# Supplementary material for: Predicting lncRNA–Protein Interactions With miRNAs as Mediators in a Heterogeneous Network Model
Source: Front Genet. 2020 Jan 22;10:1341. doi: 10.3389/fgene.2019.01341 (PMC6988623; doi:10.3389/fgene.2019.01341)
Supplement: Table S1 — 2862 experimentally verified lncRNA-miRNA interactions. [file Table_1.xlsx]

## Sheet: TableS1_LMI_TrainingSet
RAID_id	Interactor1	Category1	Id1	Species1	Interactor2	Category2	Id2	Species2	Methods	Databases_source	References	Score
RAID00001067	hsa-miR-4420	miRNA	MIMAT0018933	Homo sapiens	MALAT1	lncRNA	378938	Homo sapiens	CLIP	NPInter	23846593	0.5483
RAID00001471	hsa-miR-29b-1-5p	miRNA	MIMAT0004514	Homo sapiens	MALAT1	lncRNA	378938	Homo sapiens	CLIP	NPInter	23846593	0.5483
RAID00001721	hsa-miR-6124	miRNA	MIMAT0024597	Homo sapiens	MIR22HG	lncRNA	84981	Homo sapiens	CLIP	NPInter	23846593	0.5483
RAID00003281	hsa-miR-877-3p	miRNA	MIMAT0004950	Homo sapiens	SNHG1	lncRNA	23642	Homo sapiens	CLIP	NPInter	23846593	0.5483
RAID00005309	hsa-miR-661	miRNA	MIMAT0003324	Homo sapiens	WT1-AS	lncRNA	51352	Homo sapiens	CLIP	NPInter	23846593	0.5483
RAID00006731	hsa-miR-3662	miRNA	MIMAT0018083	Homo sapiens	OIP5-AS1	lncRNA	729082	Homo sapiens	CLIP	NPInter	23846593	0.5483
RAID00006828	hsa-miR-4639-5p	miRNA	MIMAT0019697	Homo sapiens	XIST	lncRNA	7503	Homo sapiens	CLIP	NPInter	23846593	0.5483
RAID00008245	hsa-miR-503-5p	miRNA	MIMAT0002874	Homo sapiens	ST20-AS1	lncRNA	283687	Homo sapiens	CLIP-seq//Prediction	starBase//miRanda	None	0.6308
RAID00008594	hsa-miR-4271	miRNA	MIMAT0016901	Homo sapiens	WT1-AS	lncRNA	51352	Homo sapiens	CLIP	NPInter	23846593	0.5483
RAID00010298	hsa-miR-34b-3p	miRNA	MIMAT0004676	Homo sapiens	MALAT1	lncRNA	378938	Homo sapiens	CLIP	NPInter	23846593	0.5483
RAID00011136	hsa-miR-152-3p	miRNA	MIMAT0000438	Homo sapiens	FAM201A	lncRNA	158228	Homo sapiens	CLIP-seq//Prediction	starBase//miRanda	None	0.6308
RAID00012201	hsa-miR-1303	miRNA	MIMAT0005891	Homo sapiens	SNHG1	lncRNA	23642	Homo sapiens	CLIP	NPInter	23846593	0.5483
RAID00013173	hsa-miR-203b-3p	miRNA	MIMAT0019814	Homo sapiens	MALAT1	lncRNA	378938	Homo sapiens	CLIP	NPInter	23846593	0.5483
RAID00014924	hsa-miR-4668-5p	miRNA	MIMAT0019745	Homo sapiens	OIP5-AS1	lncRNA	729082	Homo sapiens	CLIP	NPInter	23846593	0.5483
RAID00017384	hsa-miR-509-3p	miRNA	MIMAT0002881	Homo sapiens	CTBP1-AS2	lncRNA	92070	Homo sapiens	CLIP-seq	starBase	None	0.5483
RAID00017485	hsa-miR-5585-3p	miRNA	MIMAT0022286	Homo sapiens	OIP5-AS1	lncRNA	729082	Homo sapiens	CLIP	NPInter	23846593	0.5483
RAID00017499	hsa-miR-451b	miRNA	MIMAT0019840	Homo sapiens	XIST	lncRNA	7503	Homo sapiens	CLIP	NPInter	23846593	0.5483
RAID00017921	hsa-miR-4699-3p	miRNA	MIMAT0019795	Homo sapiens	LOH12CR2	lncRNA	503693	Homo sapiens	PAR-CLIP	miRTarBase	22291592//22100165	0.5483
RAID00017932	hsa-miR-3619-5p	miRNA	MIMAT0017999	Homo sapiens	MIR155HG	lncRNA	114614	Homo sapiens	CLIP	NPInter	23846593	0.5483
RAID00018510	hsa-miR-376c-3p	miRNA	MIMAT0000720	Homo sapiens	LINC00152	lncRNA	112597	Homo sapiens	CLIP-seq//Prediction	starBase//miRanda	None	0.6308
RAID00022622	hsa-miR-1255a	miRNA	MIMAT0005906	Homo sapiens	OIP5-AS1	lncRNA	729082	Homo sapiens	CLIP	NPInter	23846593	0.5483
RAID00023442	hsa-miR-6129	miRNA	MIMAT0024613	Homo sapiens	LINC00598	lncRNA	646982	Homo sapiens	PAR-CLIP	miRTarBase	23592263	0.5483
RAID00026204	hsa-miR-4763-5p	miRNA	MIMAT0019912	Homo sapiens	HOXA10-AS	lncRNA	100874323	Homo sapiens	CLIP	NPInter	23846593	0.5483
RAID00026729	hsa-miR-324-3p	miRNA	MIMAT0000762	Homo sapiens	HNRNPU	lncRNA	3192	Homo sapiens	CLIP	NPInter	23846593	0.5483
RAID00028937	hsa-miR-765	miRNA	MIMAT0003945	Homo sapiens	XIST	lncRNA	7503	Homo sapiens	CLIP	NPInter	23846593	0.5483
RAID00034428	hsa-miR-422a	miRNA	MIMAT0001339	Homo sapiens	JPX	lncRNA	554203	Homo sapiens	CLIP-seq//Prediction	starBase//miRanda	None	0.6308
RAID00034547	hsa-miR-24-3p	miRNA	MIMAT0000080	Homo sapiens	A1BG-AS1	lncRNA	503538	Homo sapiens	CLIP-seq//Prediction	starBase//miRanda	None	0.6308
RAID00034555	hsa-miR-4651	miRNA	MIMAT0019715	Homo sapiens	XIST	lncRNA	7503	Homo sapiens	CLIP	NPInter	23846593	0.5483
RAID00034802	hsa-miR-3613-3p	miRNA	MIMAT0017991	Homo sapiens	MALAT1	lncRNA	378938	Homo sapiens	CLIP	NPInter	23846593	0.5483
RAID00035091	hsa-miR-520c-3p	miRNA	MIMAT0002846	Homo sapiens	MORC2-AS1	lncRNA	150291	Homo sapiens	CLIP-seq//Prediction	starBase//miRanda	None	0.6308
RAID00040598	hsa-miR-144-3p	miRNA	MIMAT0000436	Homo sapiens	HCG11	lncRNA	493812	Homo sapiens	CLIP-seq//Prediction	starBase//miRanda	None	0.6308
RAID00042654	hsa-miR-323a-3p	miRNA	MIMAT0000755	Homo sapiens	HCP5	lncRNA	10866	Homo sapiens	CLIP-seq	starBase	None	0.5483
RAID00043708	hsa-miR-324-3p	miRNA	MIMAT0000762	Homo sapiens	HCP5	lncRNA	10866	Homo sapiens	CLIP-seq	starBase	None	0.5483
RAID00043815	hsa-miR-6510-5p	miRNA	MIMAT0025476	Homo sapiens	BCYRN1	lncRNA	618	Homo sapiens	CLIP	NPInter	23846593	0.5483
RAID00043819	hsa-miR-524-5p	miRNA	MIMAT0002849	Homo sapiens	GAS5	lncRNA	60674	Homo sapiens	CLIP	NPInter	23846593	0.5483
RAID00044776	hsa-miR-4701-3p	miRNA	MIMAT0019799	Homo sapiens	BCYRN1	lncRNA	618	Homo sapiens	CLIP	NPInter	23846593	0.5483
RAID00045669	hsa-miR-488-3p	miRNA	MIMAT0004763	Homo sapiens	SNHG4	lncRNA	724102	Homo sapiens	CLIP-seq//Prediction	starBase//miRanda	None	0.6308
RAID00046509	hsa-miR-4653-3p	miRNA	MIMAT0019719	Homo sapiens	MALAT1	lncRNA	378938	Homo sapiens	CLIP	NPInter	23846593	0.5483
RAID00049227	hsa-miR-3144-5p	miRNA	MIMAT0015014	Homo sapiens	OIP5-AS1	lncRNA	729082	Homo sapiens	CLIP	NPInter	23846593	0.5483
RAID00049475	hsa-miR-216b-5p	miRNA	MIMAT0004959	Homo sapiens	H19	lncRNA	283120	Homo sapiens	CLIP-seq//Prediction	starBase//miRanda	None	0.6308
RAID00050257	hsa-miR-548aq-3p	miRNA	MIMAT0022264	Homo sapiens	XIST	lncRNA	7503	Homo sapiens	CLIP	NPInter	23846593	0.5483
RAID00051583	hsa-miR-635	miRNA	MIMAT0003305	Homo sapiens	BCYRN1	lncRNA	618	Homo sapiens	CLIP	NPInter	23846593	0.5483
RAID00051938	hsa-miR-26a-5p	miRNA	MIMAT0000082	Homo sapiens	MCM3AP-AS1	lncRNA	114044	Homo sapiens	CLIP-seq//Prediction	starBase//miRanda	None	0.6308
RAID00053240	hsa-miR-619-3p	miRNA	MIMAT0003288	Homo sapiens	XIST	lncRNA	7503	Homo sapiens	CLIP	NPInter	23846593	0.5483
RAID00053321	hsa-miR-125a-3p	miRNA	MIMAT0004602	Homo sapiens	CDKN2B-AS1	lncRNA	100048912	Homo sapiens	CLIP-seq//Prediction	starBase//miRanda	None	0.6308
RAID00053516	hsa-miR-340-5p	miRNA	MIMAT0004692	Homo sapiens	LINC00346	lncRNA	283487	Homo sapiens	PAR-CLIP	miRTarBase	20371350	0.5483
RAID00053558	hsa-miR-20b-5p	miRNA	MIMAT0001413	Homo sapiens	LINC00598	lncRNA	646982	Homo sapiens	CLIP-seq	miRTarBase	23313552	0.5483
RAID00054687	hsa-miR-4668-5p	miRNA	MIMAT0019745	Homo sapiens	BCYRN1	lncRNA	618	Homo sapiens	CLIP	NPInter	23846593	0.5483
RAID00055228	hsa-miR-146a-5p	miRNA	MIMAT0000449	Homo sapiens	RPS10P7	lncRNA	376693	Homo sapiens	CLIP-seq//Prediction	starBase//miRanda	None	0.6308
RAID00058896	hsa-miR-3154	miRNA	MIMAT0015028	Homo sapiens	XIST	lncRNA	7503	Homo sapiens	CLIP	NPInter	23846593	0.5483
RAID00060747	hsa-miR-200c-3p	miRNA	MIMAT0000617	Homo sapiens	SUZ12P1	lncRNA	440423	Homo sapiens	CLIP-seq//Prediction	starBase//miRanda	None	0.6308
RAID00063604	hsa-miR-1277-5p	miRNA	MIMAT0022724	Homo sapiens	XIST	lncRNA	7503	Homo sapiens	CLIP	NPInter	23846593	0.5483
RAID00068903	hsa-miR-3127-3p	miRNA	MIMAT0019201	Homo sapiens	BCYRN1	lncRNA	618	Homo sapiens	CLIP	NPInter	23846593	0.5483
RAID00070116	hsa-miR-518c-5p	miRNA	MIMAT0002847	Homo sapiens	TP73-AS1	lncRNA	57212	Homo sapiens	CLIP-seq	starBase	None	0.5483
RAID00070880	hsa-miR-4496	miRNA	MIMAT0019031	Homo sapiens	WT1-AS	lncRNA	51352	Homo sapiens	CLIP	NPInter	23846593	0.5483
RAID00071595	hsa-miR-9-5p	miRNA	MIMAT0000441	Homo sapiens	ST7-OT3	lncRNA	93655	Homo sapiens	CLIP-seq//Prediction	starBase//miRanda	None	0.6308
RAID00072269	hsa-miR-106a-5p	miRNA	MIMAT0000103	Homo sapiens	DSCR9	lncRNA	257203	Homo sapiens	CLIP//Prediction	NPInter//miRanda	25531890	0.6308
RAID00072282	hsa-miR-190a-5p	miRNA	MIMAT0000458	Homo sapiens	MIR155HG	lncRNA	114614	Homo sapiens	CLIP-seq//Prediction	starBase//miRanda	None	0.6308
RAID00073215	hsa-let-7d-5p	miRNA	MIMAT0000065	Homo sapiens	KRASP1	lncRNA	3844	Homo sapiens	Reporter Assay//RT-PCR	RAID	20577206	0.8808
RAID00076391	kshv-miR-K12-10a-3p	miRNA	MIMAT0002179	Human herpesvirus 8	LRRC75A-AS1	lncRNA	125144	Homo sapiens	PAR-CLIP	ViRBase	22100165	0.5483
RAID00076502	hsa-miR-5008-3p	miRNA	MIMAT0021040	Homo sapiens	MIR22HG	lncRNA	84981	Homo sapiens	CLIP	NPInter	23846593	0.5483
RAID00076932	hsa-miR-330-5p	miRNA	MIMAT0004693	Homo sapiens	ST7-OT3	lncRNA	93655	Homo sapiens	CLIP-seq//Prediction	starBase//miRanda	None	0.6308
RAID00077171	mmu-miR-374b-5p	miRNA	MIMAT0003727	Mus musculus	AI504432	lncRNA	229694	Mus musculus	CLIP-seq//Prediction	starBase//miRanda	None	0.6308
RAID00082738	hsa-miR-193a-3p	miRNA	MIMAT0000459	Homo sapiens	JPX	lncRNA	554203	Homo sapiens	CLIP-seq//Prediction	starBase//miRanda	None	0.6308
RAID00085622	hsa-miR-5095	miRNA	MIMAT0020600	Homo sapiens	OIP5-AS1	lncRNA	729082	Homo sapiens	CLIP	NPInter	23846593	0.5483
RAID00086230	hsa-miR-524-5p	miRNA	MIMAT0002849	Homo sapiens	MIR22HG	lncRNA	84981	Homo sapiens	CLIP	NPInter	23846593	0.5483
RAID00087978	hsa-miR-125a-5p	miRNA	MIMAT0000443	Homo sapiens	INE1	lncRNA	8552	Homo sapiens	CLIP-seq//Prediction	starBase//miRanda	None	0.6308
RAID00091272	hsa-miR-4723-5p	miRNA	MIMAT0019838	Homo sapiens	BDNF-AS	lncRNA	497258	Homo sapiens	PAR-CLIP	miRTarBase	23592263	0.5483
RAID00092703	hsa-miR-371a-5p	miRNA	MIMAT0004687	Homo sapiens	PWARSN	lncRNA	347746	Homo sapiens	CLIP-seq//Prediction	starBase//miRanda	None	0.6308
RAID00092921	hsa-miR-548l	miRNA	MIMAT0005889	Homo sapiens	XIST	lncRNA	7503	Homo sapiens	CLIP	NPInter	23846593	0.5483
RAID00093987	hsa-miR-10a-5p	miRNA	MIMAT0000253	Homo sapiens	RPL13AP17	lncRNA	399670	Homo sapiens	CLIP-seq//Prediction	starBase//miRanda	None	0.6308
RAID00096296	hsa-miR-562	miRNA	MIMAT0003226	Homo sapiens	LINC00346	lncRNA	283487	Homo sapiens	PAR-CLIP	miRTarBase	23592263//20371350	0.5483
RAID00101226	hsa-miR-204-3p	miRNA	MIMAT0022693	Homo sapiens	OIP5-AS1	lncRNA	729082	Homo sapiens	CLIP	NPInter	23846593	0.5483
RAID00105296	hsa-miR-106a-5p	miRNA	MIMAT0000103	Homo sapiens	MINOS1P1	lncRNA	100462953	Homo sapiens	CLIP	NPInter	25531890	0.5483
RAID00105897	hsa-miR-143-5p	miRNA	MIMAT0004599	Homo sapiens	BCYRN1	lncRNA	618	Homo sapiens	CLIP	NPInter	23846593	0.5483
RAID00105971	hsa-miR-5584-5p	miRNA	MIMAT0022283	Homo sapiens	WT1-AS	lncRNA	51352	Homo sapiens	CLIP	NPInter	23846593	0.5483
RAID00106145	hsa-miR-424-5p	miRNA	MIMAT0001341	Homo sapiens	SNHG1	lncRNA	23642	Homo sapiens	CLIP	NPInter	23846593	0.5483
RAID00106678	hsa-miR-96-3p	miRNA	MIMAT0004510	Homo sapiens	LINC00598	lncRNA	646982	Homo sapiens	PAR-CLIP	miRTarBase	20371350//21572407	0.5483
RAID00108865	hsa-miR-370-3p	miRNA	MIMAT0000722	Homo sapiens	FAM201A	lncRNA	158228	Homo sapiens	CLIP-seq//Prediction	starBase//miRanda	None	0.6308
RAID00109580	hsa-miR-492	miRNA	MIMAT0002812	Homo sapiens	CROCCP2	lncRNA	84809	Homo sapiens	CLIP-seq	starBase	None	0.5483
RAID00109662	mmu-miR-9-5p	miRNA	MIMAT0000142	Mus musculus	AI504432	lncRNA	229694	Mus musculus	NGS (Next Generation Sequencing)//Prediction	miRTarBase//miRanda	19536157	0.6308
RAID00112891	hsa-miR-106a-5p	miRNA	MIMAT0000103	Homo sapiens	LINC00174	lncRNA	285908	Homo sapiens	CLIP	NPInter	25531890	0.5483
RAID00113380	hsa-miR-335-5p	miRNA	MIMAT0000765	Homo sapiens	BVES-AS1	lncRNA	154442	Homo sapiens	Microarray	miRTarBase	18185580	0.5483
RAID00118046	hsa-miR-762	miRNA	MIMAT0010313	Homo sapiens	MIR137HG	lncRNA	400765	Homo sapiens	CLIP	NPInter	23846593	0.5483
RAID00119003	hsa-miR-107	miRNA	MIMAT0000104	Homo sapiens	CRHR1-IT1	lncRNA	147081	Homo sapiens	CLIP-seq//Prediction	starBase//miRanda	None	0.6308
RAID00121453	hsa-miR-3667-5p	miRNA	MIMAT0018089	Homo sapiens	OIP5-AS1	lncRNA	729082	Homo sapiens	CLIP	NPInter	23846593	0.5483
RAID00122030	hsa-miR-125b-2-3p	miRNA	MIMAT0004603	Homo sapiens	XIST	lncRNA	7503	Homo sapiens	CLIP	NPInter	23846593	0.5483
RAID00125783	hsa-miR-29b-1-5p	miRNA	MIMAT0004514	Homo sapiens	HNRNPU	lncRNA	3192	Homo sapiens	CLIP	NPInter	23846593	0.5483
RAID00126011	hsa-miR-93-5p	miRNA	MIMAT0000093	Homo sapiens	SNHG20	lncRNA	654434	Homo sapiens	CLIP-seq//Prediction	starBase//miRanda	None	0.6308
RAID00126250	hsa-miR-1285-5p	miRNA	MIMAT0022719	Homo sapiens	BCYRN1	lncRNA	618	Homo sapiens	CLIP	NPInter	23846593	0.5483
RAID00129901	hsa-miR-139-5p	miRNA	MIMAT0000250	Homo sapiens	SNHG3	lncRNA	8420	Homo sapiens	CLIP	NPInter	23846593	0.5483
RAID00130089	hsa-miR-130b-5p	miRNA	MIMAT0004680	Homo sapiens	LINC00598	lncRNA	646982	Homo sapiens	CLIP-seq	miRTarBase	23824327	0.5483
RAID00134737	hsa-miR-23b-3p	miRNA	MIMAT0000418	Homo sapiens	TOP1P2	lncRNA	7152	Homo sapiens	CLIP-seq//Prediction	starBase//miRanda	None	0.6308
RAID00135906	hsa-miR-665	miRNA	MIMAT0004952	Homo sapiens	BCYRN1	lncRNA	618	Homo sapiens	CLIP	NPInter	23846593	0.5483
RAID00136060	hsa-miR-106a-5p	miRNA	MIMAT0000103	Homo sapiens	THRB-IT1	lncRNA	100874274	Homo sapiens	CLIP	NPInter	25531890	0.5483
RAID00136114	hsa-miR-145-5p	miRNA	MIMAT0000437	Homo sapiens	TUG1	lncRNA	55000	Homo sapiens	RIP (RNA Immunoprecipitation)//Reporter Assay//RT-PCR//CLIP-seq//Prediction	RAID//starBase//miRanda	26318860	0.9825
RAID00136608	hsa-miR-6870-5p	miRNA	MIMAT0027640	Homo sapiens	BDNF-AS	lncRNA	497258	Homo sapiens	PAR-CLIP	miRTarBase	23592263	0.5483
RAID00137560	hsa-miR-3937	miRNA	MIMAT0018352	Homo sapiens	HNRNPU	lncRNA	3192	Homo sapiens	CLIP	NPInter	23846593	0.5483
RAID00138346	hsa-miR-4793-5p	miRNA	MIMAT0019965	Homo sapiens	MIR22HG	lncRNA	84981	Homo sapiens	CLIP	NPInter	23846593	0.5483
RAID00139032	hsa-miR-548o-3p	miRNA	MIMAT0005919	Homo sapiens	MALAT1	lncRNA	378938	Homo sapiens	CLIP	NPInter	23846593	0.5483
RAID00139657	hsa-miR-3169	miRNA	MIMAT0015044	Homo sapiens	LRRC75A-AS1	lncRNA	125144	Homo sapiens	CLIP	NPInter	23846593	0.5483
RAID00139797	hsa-miR-204-5p	miRNA	MIMAT0000265	Homo sapiens	DGCR5	lncRNA	26220	Homo sapiens	CLIP-seq//Prediction	starBase//miRanda	None	0.6308
RAID00140015	hsa-miR-382-5p	miRNA	MIMAT0000737	Homo sapiens	LOC645166	lncRNA	645166	Homo sapiens	CLIP-seq//Prediction	starBase//miRanda	None	0.6308
RAID00141675	hsa-miR-203a-3p	miRNA	MIMAT0000264	Homo sapiens	PWARSN	lncRNA	347746	Homo sapiens	CLIP-seq//Prediction	starBase//miRanda	None	0.6308
RAID00143438	hsa-miR-106a-5p	miRNA	MIMAT0000103	Homo sapiens	HOTAIR	lncRNA	100124700	Homo sapiens	CLIP	NPInter	25531890	0.5483
RAID00152693	hsa-miR-150-5p	miRNA	MIMAT0000451	Homo sapiens	ZFAS1	lncRNA	441951	Homo sapiens	CLIP-seq//Prediction	starBase//miRanda	None	0.6308
RAID00152992	hsa-miR-149-3p	miRNA	MIMAT0004609	Homo sapiens	MIR137HG	lncRNA	400765	Homo sapiens	CLIP	NPInter	23846593	0.5483
RAID00154291	hsa-miR-149-3p	miRNA	MIMAT0004609	Homo sapiens	BDNF-AS	lncRNA	497258	Homo sapiens	PAR-CLIP	miRTarBase	23592263	0.5483
RAID00154336	hsa-miR-33a-5p	miRNA	MIMAT0000091	Homo sapiens	DANCR	lncRNA	57291	Homo sapiens	CLIP-seq//Prediction	starBase//miRanda	None	0.6308
RAID00154792	hsa-miR-6774-5p	miRNA	MIMAT0027448	Homo sapiens	LINC00632	lncRNA	286411	Homo sapiens	CLIP-seq	miRTarBase	23824327	0.5483
RAID00154900	hsa-miR-548ak	miRNA	MIMAT0019013	Homo sapiens	OIP5-AS1	lncRNA	729082	Homo sapiens	CLIP	NPInter	23846593	0.5483
RAID00158157	hsa-miR-1273f	miRNA	MIMAT0020601	Homo sapiens	BCYRN1	lncRNA	618	Homo sapiens	CLIP	NPInter	23846593	0.5483
RAID00160404	hsa-miR-422a	miRNA	MIMAT0001339	Homo sapiens	RPL23AP82	lncRNA	284942	Homo sapiens	CLIP-seq//Prediction	starBase//miRanda	None	0.6308
RAID00160421	hsa-miR-34a-5p	miRNA	MIMAT0000255	Homo sapiens	IDI2-AS1	lncRNA	55853	Homo sapiens	CLIP-seq	starBase	None	0.5483
RAID00161657	hsa-miR-578	miRNA	MIMAT0003243	Homo sapiens	XIST	lncRNA	7503	Homo sapiens	CLIP	NPInter	23846593	0.5483
RAID00162932	hsa-miR-106b-5p	miRNA	MIMAT0000680	Homo sapiens	E2F3P1	lncRNA	1872	Homo sapiens	Reporter Assay//RT-PCR	RAID	20577206	0.8808
RAID00163312	hsa-miR-4512	miRNA	MIMAT0019049	Homo sapiens	BCYRN1	lncRNA	618	Homo sapiens	CLIP	NPInter	23846593	0.5483
RAID00163547	hsa-miR-93-5p	miRNA	MIMAT0000093	Homo sapiens	LINC00598	lncRNA	646982	Homo sapiens	CLIP-seq	miRTarBase	23313552	0.5483
RAID00163950	hsa-miR-106a-5p	miRNA	MIMAT0000103	Homo sapiens	ZNF518A	lncRNA	9849	Homo sapiens	CLIP	NPInter	25531890	0.5483
RAID00166231	hsa-miR-30e-5p	miRNA	MIMAT0000692	Homo sapiens	DGCR5	lncRNA	26220	Homo sapiens	CLIP-seq//Prediction	starBase//miRanda	None	0.6308
RAID00170293	hsa-miR-33a-5p	miRNA	MIMAT0000091	Homo sapiens	ZNF503-AS2	lncRNA	100131213	Homo sapiens	CLIP-seq//Prediction	starBase//miRanda	None	0.6308
RAID00171489	hsa-miR-134-5p	miRNA	MIMAT0000447	Homo sapiens	DLEU1	lncRNA	10301	Homo sapiens	CLIP-seq//Prediction	starBase//miRanda	None	0.6308
RAID00172091	hsa-miR-224-5p	miRNA	MIMAT0000281	Homo sapiens	CRHR1-IT1	lncRNA	147081	Homo sapiens	CLIP-seq//Prediction	starBase//miRanda	None	0.6308
RAID00172482	hsa-miR-520d-3p	miRNA	MIMAT0002856	Homo sapiens	LINC00598	lncRNA	646982	Homo sapiens	CLIP-seq	miRTarBase	23313552	0.5483
RAID00172671	hsa-miR-4772-3p	miRNA	MIMAT0019927	Homo sapiens	OIP5-AS1	lncRNA	729082	Homo sapiens	CLIP	NPInter	23846593	0.5483
RAID00173383	hsa-miR-202-5p	miRNA	MIMAT0002810	Homo sapiens	LINC00472	lncRNA	79940	Homo sapiens	CLIP-seq	starBase	None	0.5483
RAID00176012	hsa-miR-106a-5p	miRNA	MIMAT0000103	Homo sapiens	GS1-124K5.4	lncRNA	100289098	Homo sapiens	CLIP	NPInter	25531890	0.5483
RAID00176301	hsa-miR-3122	miRNA	MIMAT0014984	Homo sapiens	LINC00346	lncRNA	283487	Homo sapiens	CLIP-seq	miRTarBase	23824327	0.5483
RAID00176329	hsa-miR-4684-5p	miRNA	MIMAT0019769	Homo sapiens	XIST	lncRNA	7503	Homo sapiens	CLIP	NPInter	23846593	0.5483
RAID00179761	hsa-miR-106a-5p	miRNA	MIMAT0000103	Homo sapiens	ZNF32-AS2	lncRNA	414208	Homo sapiens	CLIP	NPInter	25531890	0.5483
RAID00180379	hsa-miR-196b-5p	miRNA	MIMAT0001080	Homo sapiens	H19	lncRNA	283120	Homo sapiens	CLIP-seq	starBase	None	0.5483
RAID00180406	hsa-miR-6790-3p	miRNA	MIMAT0027481	Homo sapiens	DLEU1	lncRNA	10301	Homo sapiens	CLIP-seq	miRTarBase	23824327	0.5483
RAID00181102	hsa-miR-6892-3p	miRNA	MIMAT0027685	Homo sapiens	LINC00598	lncRNA	646982	Homo sapiens	CLIP-seq	miRTarBase	23824327	0.5483
RAID00182780	hsa-miR-548c-5p	miRNA	MIMAT0004806	Homo sapiens	XIST	lncRNA	7503	Homo sapiens	CLIP	NPInter	23846593	0.5483
RAID00183710	hsa-miR-4633-5p	miRNA	MIMAT0019689	Homo sapiens	MALAT1	lncRNA	378938	Homo sapiens	CLIP	NPInter	23846593	0.5483
RAID00185312	hsa-miR-144-3p	miRNA	MIMAT0000436	Homo sapiens	TUG1	lncRNA	55000	Homo sapiens	Reporter Assay//Prediction	RAID//miRanda	26078353	0.7802
RAID00186179	hsa-miR-4495	miRNA	MIMAT0019030	Homo sapiens	HNRNPU	lncRNA	3192	Homo sapiens	CLIP	NPInter	23846593	0.5483
RAID00186795	hsa-miR-548aa	miRNA	MIMAT0018447	Homo sapiens	LINC00461	lncRNA	645323	Homo sapiens	CLIP	NPInter	23846593	0.5483
RAID00188259	hsa-miR-1273g-3p	miRNA	MIMAT0022742	Homo sapiens	SNHG3	lncRNA	8420	Homo sapiens	CLIP	NPInter	23846593	0.5483
RAID00188680	hsa-miR-15b-5p	miRNA	MIMAT0000417	Homo sapiens	CTBP1-AS2	lncRNA	92070	Homo sapiens	CLIP-seq//Prediction	starBase//miRanda	None	0.6308
RAID00190367	hsa-miR-4677-5p	miRNA	MIMAT0019760	Homo sapiens	XIST	lncRNA	7503	Homo sapiens	CLIP	NPInter	23846593	0.5483
RAID00191463	hsa-miR-590-5p	miRNA	MIMAT0003258	Homo sapiens	TUG1	lncRNA	55000	Homo sapiens	CLIP-seq//Prediction	starBase//miRanda	None	0.6308
RAID00195769	hsa-miR-181a-5p	miRNA	MIMAT0000256	Homo sapiens	IPW	lncRNA	3653	Homo sapiens	CLIP-seq//Prediction	starBase//miRanda	None	0.6308
RAID00195885	hsa-miR-497-5p	miRNA	MIMAT0002820	Homo sapiens	ZNRD1-AS1	lncRNA	80862	Homo sapiens	CLIP-seq//Prediction	starBase//miRanda	None	0.6308
RAID00197321	hsa-miR-4775	miRNA	MIMAT0019931	Homo sapiens	OIP5-AS1	lncRNA	729082	Homo sapiens	CLIP	NPInter	23846593	0.5483
RAID00198119	hsa-miR-337-3p	miRNA	MIMAT0000754	Homo sapiens	HNRNPU	lncRNA	3192	Homo sapiens	CLIP	NPInter	23846593	0.5483
RAID00199060	hsa-miR-5096	miRNA	MIMAT0020603	Homo sapiens	SNHG3	lncRNA	8420	Homo sapiens	CLIP	NPInter	23846593	0.5483
RAID00203795	hsa-miR-18a-5p	miRNA	MIMAT0000072	Homo sapiens	CASC2	lncRNA	255082	Homo sapiens	CLIP-seq//Prediction	starBase//miRanda	None	0.6308
RAID00204833	hsa-miR-502-3p	miRNA	MIMAT0004775	Homo sapiens	LINC00632	lncRNA	286411	Homo sapiens	CLIP-seq	miRTarBase	23313552	0.5483
RAID00205630	hsa-miR-1-3p	miRNA	MIMAT0000416	Homo sapiens	MALAT1	lncRNA	378938	Homo sapiens	RT-PCR//Reporter Assay//RIP (RNA Immunoprecipitation)//CLIP-seq//CLIP//Prediction	NPInter//starBase//RAID//miRanda	26482776//23846593//26275461	0.9868
RAID00209070	mmu-miR-27a-3p	miRNA	MIMAT0000537	Mus musculus	Rnf149	lncRNA	67702	Mus musculus	CLIP-seq	starBase	None	0.5483
RAID00210115	hsa-miR-335-5p	miRNA	MIMAT0000765	Homo sapiens	LINC01600	lncRNA	154386	Homo sapiens	Microarray	miRTarBase	18185580	0.5483
RAID00210792	hsa-miR-515-5p	miRNA	MIMAT0002826	Homo sapiens	XIST	lncRNA	7503	Homo sapiens	CLIP	NPInter	23846593	0.5483
RAID00210986	hsa-miR-1224-3p	miRNA	MIMAT0005459	Homo sapiens	MALAT1	lncRNA	378938	Homo sapiens	CLIP	NPInter	23846593	0.5483
RAID00211154	hsa-miR-589-5p	miRNA	MIMAT0004799	Homo sapiens	MALAT1	lncRNA	378938	Homo sapiens	CLIP	NPInter	23846593	0.5483
RAID00213548	hsa-miR-1229-5p	miRNA	MIMAT0022942	Homo sapiens	XIST	lncRNA	7503	Homo sapiens	CLIP	NPInter	23846593	0.5483
RAID00214249	hsa-miR-101-3p	miRNA	MIMAT0000099	Homo sapiens	FAM201A	lncRNA	158228	Homo sapiens	CLIP-seq//Prediction	starBase//miRanda	None	0.6308
RAID00216674	hsa-miR-106a-5p	miRNA	MIMAT0000103	Homo sapiens	GHRLOS	lncRNA	100126793	Homo sapiens	CLIP	NPInter	25531890	0.5483
RAID00217506	hsa-miR-513c-3p	miRNA	MIMAT0022728	Homo sapiens	MALAT1	lncRNA	378938	Homo sapiens	CLIP	NPInter	23846593	0.5483
RAID00219387	hsa-miR-6072	miRNA	MIMAT0023697	Homo sapiens	GAS5	lncRNA	60674	Homo sapiens	CLIP	NPInter	23846593	0.5483
RAID00220180	hsa-miR-608	miRNA	MIMAT0003276	Homo sapiens	BCYRN1	lncRNA	618	Homo sapiens	CLIP	NPInter	23846593	0.5483
RAID00222886	hsa-miR-3159	miRNA	MIMAT0015033	Homo sapiens	XIST	lncRNA	7503	Homo sapiens	CLIP	NPInter	23846593	0.5483
RAID00222960	hsa-miR-555	miRNA	MIMAT0003219	Homo sapiens	LINC00346	lncRNA	283487	Homo sapiens	PAR-CLIP	miRTarBase	20371350	0.5483
RAID00223057	hsa-miR-3133	miRNA	MIMAT0014998	Homo sapiens	LINC00346	lncRNA	283487	Homo sapiens	PAR-CLIP	miRTarBase	20371350	0.5483
RAID00224799	hsa-miR-4716-3p	miRNA	MIMAT0019827	Homo sapiens	LINC00461	lncRNA	645323	Homo sapiens	CLIP	NPInter	23846593	0.5483
RAID00224980	hsa-miR-302c-5p	miRNA	MIMAT0000716	Homo sapiens	PI4KAP1	lncRNA	728233	Homo sapiens	CLIP-seq	starBase	None	0.5483
RAID00225967	hsa-miR-15b-5p	miRNA	MIMAT0000417	Homo sapiens	TEX41	lncRNA	401014	Homo sapiens	CLIP-seq//Prediction	starBase//miRanda	None	0.6308
RAID00228565	hsa-miR-520a-5p	miRNA	MIMAT0002833	Homo sapiens	MAPKAPK5-AS1	lncRNA	51275	Homo sapiens	CLIP-seq	starBase	None	0.5483
RAID00228990	hsa-miR-182-5p	miRNA	MIMAT0000259	Homo sapiens	ZNF252P-AS1	lncRNA	286103	Homo sapiens	CLIP-seq	starBase	None	0.5483
RAID00229329	hsa-miR-4419b	miRNA	MIMAT0019034	Homo sapiens	LINC00598	lncRNA	646982	Homo sapiens	CLIP-seq	miRTarBase	23824327	0.5483
RAID00229735	hsa-miR-18b-5p	miRNA	MIMAT0001412	Homo sapiens	SNHG20	lncRNA	654434	Homo sapiens	CLIP-seq//Prediction	starBase//miRanda	None	0.6308
RAID00230622	kshv-miR-K12-3-3p	miRNA	MIMAT0002194	Human herpesvirus 8	FOXO3B	lncRNA	2310	Homo sapiens	PAR-CLIP	ViRBase	22100165	0.5483
RAID00231468	hsa-miR-190b	miRNA	MIMAT0004929	Homo sapiens	SND1-IT1	lncRNA	27099	Homo sapiens	CLIP-seq//Prediction	starBase//miRanda	None	0.6308
RAID00232517	hsa-miR-1271-5p	miRNA	MIMAT0005796	Homo sapiens	ST7-OT3	lncRNA	93655	Homo sapiens	CLIP-seq//Prediction	starBase//miRanda	None	0.6308
RAID00237883	hsa-miR-4501	miRNA	MIMAT0019037	Homo sapiens	BCYRN1	lncRNA	618	Homo sapiens	CLIP	NPInter	23846593	0.5483
RAID00237954	hsa-miR-31-5p	miRNA	MIMAT0000089	Homo sapiens	TINCR	lncRNA	257000	Homo sapiens	CLIP-seq	starBase	None	0.5483
RAID00238128	hsa-miR-4323	miRNA	MIMAT0016875	Homo sapiens	OIP5-AS1	lncRNA	729082	Homo sapiens	CLIP	NPInter	23846593	0.5483
RAID00238689	hsa-miR-25-3p	miRNA	MIMAT0000081	Homo sapiens	IPW	lncRNA	3653	Homo sapiens	CLIP-seq//Prediction	starBase//miRanda	None	0.6308
RAID00239029	hsa-miR-203a-3p	miRNA	MIMAT0000264	Homo sapiens	LINC00598	lncRNA	646982	Homo sapiens	PAR-CLIP	miRTarBase	22100165	0.5483
RAID00239868	hsa-miR-212-3p	miRNA	MIMAT0000269	Homo sapiens	ZNRD1-AS1	lncRNA	80862	Homo sapiens	CLIP-seq//Prediction	starBase//miRanda	None	0.6308
RAID00242399	hsa-miR-4506	miRNA	MIMAT0019042	Homo sapiens	XIST	lncRNA	7503	Homo sapiens	CLIP	NPInter	23846593	0.5483
RAID00245899	hsa-miR-494-3p	miRNA	MIMAT0002816	Homo sapiens	ZNRD1-AS1	lncRNA	80862	Homo sapiens	CLIP-seq//Prediction	starBase//miRanda	None	0.6308
RAID00246325	hsa-miR-320b	miRNA	MIMAT0005792	Homo sapiens	LINC00341	lncRNA	79686	Homo sapiens	CLIP-seq//Prediction	starBase//miRanda	None	0.6308
RAID00246340	hsa-miR-519d-3p	miRNA	MIMAT0002853	Homo sapiens	PVT1	lncRNA	5820	Homo sapiens	CLIP-seq//Prediction	starBase//miRanda	None	0.6308
RAID00250799	hsa-miR-106a-5p	miRNA	MIMAT0000103	Homo sapiens	CSPG4P5	lncRNA	114817	Homo sapiens	CLIP	NPInter	25531890	0.5483
RAID00251581	hsa-miR-297	miRNA	MIMAT0004450	Homo sapiens	BCYRN1	lncRNA	618	Homo sapiens	CLIP	NPInter	23846593	0.5483
RAID00258311	ebv-miR-BHRF1-3	miRNA	MIMAT0000998	Human herpesvirus 4	PTENP1	lncRNA	11191	Homo sapiens	PAR-CLIP	ViRBase	22291592	0.5483
RAID00258334	hsa-miR-34a-5p	miRNA	MIMAT0000255	Homo sapiens	LOC645166	lncRNA	645166	Homo sapiens	CLIP-seq//Prediction	starBase//miRanda	None	0.6308
RAID00258523	hsa-miR-205-5p	miRNA	MIMAT0000266	Homo sapiens	RPS10P7	lncRNA	376693	Homo sapiens	CLIP-seq//Prediction	starBase//miRanda	None	0.6308
RAID00261222	hsa-miR-3680-3p	miRNA	MIMAT0018107	Homo sapiens	HNRNPU	lncRNA	3192	Homo sapiens	CLIP	NPInter	23846593	0.5483
RAID00262002	hsa-miR-4638-5p	miRNA	MIMAT0019695	Homo sapiens	LINC00598	lncRNA	646982	Homo sapiens	CLIP-seq	miRTarBase	23824327	0.5483
RAID00262144	hsa-miR-526b-5p	miRNA	MIMAT0002835	Homo sapiens	XIST	lncRNA	7503	Homo sapiens	CLIP	NPInter	23846593	0.5483
RAID00264204	hsa-miR-124-3p	miRNA	MIMAT0000422	Homo sapiens	DLEU1	lncRNA	10301	Homo sapiens	CLIP-seq	miRTarBase	19536157	0.5483
RAID00265477	hsa-miR-3664-5p	miRNA	MIMAT0018086	Homo sapiens	BCYRN1	lncRNA	618	Homo sapiens	CLIP	NPInter	23846593	0.5483
RAID00266060	hsa-miR-485-5p	miRNA	MIMAT0002175	Homo sapiens	FAM13A-AS1	lncRNA	285512	Homo sapiens	CLIP-seq	starBase	None	0.5483
RAID00267034	hsa-miR-22-3p	miRNA	MIMAT0000077	Homo sapiens	LRRC75A-AS1	lncRNA	125144	Homo sapiens	CLIP-seq//Prediction	starBase//miRanda	None	0.6308
RAID00267266	hsa-miR-20b-5p	miRNA	MIMAT0001413	Homo sapiens	BCYRN1	lncRNA	618	Homo sapiens	CLIP	NPInter	23846593	0.5483
RAID00267516	hsa-miR-302d-3p	miRNA	MIMAT0000718	Homo sapiens	LINC00598	lncRNA	646982	Homo sapiens	CLIP-seq	miRTarBase	23313552	0.5483
RAID00268386	hsa-miR-758-3p	miRNA	MIMAT0003879	Homo sapiens	BCYRN1	lncRNA	618	Homo sapiens	CLIP	NPInter	23846593	0.5483
RAID00270757	hsa-miR-520d-5p	miRNA	MIMAT0002855	Homo sapiens	XIST	lncRNA	7503	Homo sapiens	CLIP	NPInter	23846593	0.5483
RAID00271878	hsa-miR-106a-5p	miRNA	MIMAT0000103	Homo sapiens	ZNF718	lncRNA	255403	Homo sapiens	CLIP	NPInter	25531890	0.5483
RAID00276179	hsa-miR-29c-3p	miRNA	MIMAT0000681	Homo sapiens	CIDECP	lncRNA	152302	Homo sapiens	CLIP-seq	starBase	None	0.5483
RAID00278208	hsa-miR-5189-5p	miRNA	MIMAT0021120	Homo sapiens	OIP5-AS1	lncRNA	729082	Homo sapiens	CLIP	NPInter	23846593	0.5483
RAID00278433	hsa-miR-197-3p	miRNA	MIMAT0000227	Homo sapiens	IGF2-AS	lncRNA	51214	Homo sapiens	Microarray//Prediction	miRTarBase//miRanda	16822819	0.6308
RAID00283597	hsa-let-7c-5p	miRNA	MIMAT0000064	Homo sapiens	LINC00472	lncRNA	79940	Homo sapiens	CLIP-seq	starBase	None	0.5483
RAID00287360	hsa-miR-302d-5p	miRNA	MIMAT0004685	Homo sapiens	XIST	lncRNA	7503	Homo sapiens	CLIP	NPInter	23846593	0.5483
RAID00287670	hsa-miR-34c-5p	miRNA	MIMAT0000686	Homo sapiens	THSD1P1	lncRNA	374500	Homo sapiens	CLIP-seq	starBase	None	0.5483
RAID00289661	hsa-miR-106b-5p	miRNA	MIMAT0000680	Homo sapiens	LINC00483	lncRNA	55018	Homo sapiens	Microarray	miRTarBase	17242205	0.5483
RAID00294701	hsa-miR-194-5p	miRNA	MIMAT0000460	Homo sapiens	XIST	lncRNA	7503	Homo sapiens	CLIP	NPInter	23846593	0.5483
RAID00295764	hsa-miR-2467-3p	miRNA	MIMAT0019953	Homo sapiens	HNRNPU	lncRNA	3192	Homo sapiens	CLIP	NPInter	23846593	0.5483
RAID00297182	hsa-miR-520a-3p	miRNA	MIMAT0002834	Homo sapiens	TP73-AS1	lncRNA	57212	Homo sapiens	CLIP-seq	starBase	None	0.5483
RAID00297486	hsa-miR-153-3p	miRNA	MIMAT0000439	Homo sapiens	MIR17HG	lncRNA	407975	Homo sapiens	CLIP-seq//Prediction	starBase//miRanda	None	0.6308
RAID00298994	hsa-miR-217	miRNA	MIMAT0000274	Homo sapiens	MALAT1	lncRNA	378938	Homo sapiens	RT-PCR//Reporter Assay	RAID	26415832	0.8808
RAID00299161	hsa-miR-135a-5p	miRNA	MIMAT0000428	Homo sapiens	DANCR	lncRNA	57291	Homo sapiens	CLIP-seq//Prediction	starBase//miRanda	None	0.6308
RAID00302327	hsa-miR-20a-5p	miRNA	MIMAT0000075	Homo sapiens	WHAMMP2	lncRNA	440253	Homo sapiens	CLIP-seq//Prediction	starBase//miRanda	None	0.6308
RAID00303112	hsa-miR-519e-3p	miRNA	MIMAT0002829	Homo sapiens	WT1-AS	lncRNA	51352	Homo sapiens	CLIP	NPInter	23846593	0.5483
RAID00306421	hsa-miR-224-5p	miRNA	MIMAT0000281	Homo sapiens	OIP5-AS1	lncRNA	729082	Homo sapiens	CLIP	NPInter	23846593	0.5483
RAID00310042	hsa-miR-4519	miRNA	MIMAT0019056	Homo sapiens	BDNF-AS	lncRNA	497258	Homo sapiens	PAR-CLIP	miRTarBase	23592263	0.5483
RAID00312985	hsa-miR-544a	miRNA	MIMAT0003164	Homo sapiens	JPX	lncRNA	554203	Homo sapiens	CLIP-seq//Prediction	starBase//miRanda	None	0.6308
RAID00314839	hsa-miR-188-3p	miRNA	MIMAT0004613	Homo sapiens	MALAT1	lncRNA	378938	Homo sapiens	CLIP	NPInter	23846593	0.5483
RAID00314989	hsa-miR-551b-5p	miRNA	MIMAT0004794	Homo sapiens	BCYRN1	lncRNA	618	Homo sapiens	CLIP	NPInter	23846593	0.5483
RAID00316475	hsa-miR-19a-3p	miRNA	MIMAT0000073	Homo sapiens	LINC00094	lncRNA	266655	Homo sapiens	CLIP-seq//Prediction	starBase//miRanda	None	0.6308
RAID00316987	hsa-miR-106a-5p	miRNA	MIMAT0000103	Homo sapiens	HAS2-AS1	lncRNA	594842	Homo sapiens	CLIP	NPInter	25531890	0.5483
RAID00317011	hsa-miR-3714	miRNA	MIMAT0018165	Homo sapiens	BCYRN1	lncRNA	618	Homo sapiens	CLIP	NPInter	23846593	0.5483
RAID00319910	hsa-miR-5787	miRNA	MIMAT0023252	Homo sapiens	LINC00346	lncRNA	283487	Homo sapiens	CLIP-seq	miRTarBase	23824327	0.5483
RAID00320661	hsa-miR-377-3p	miRNA	MIMAT0000730	Homo sapiens	ZNF252P-AS1	lncRNA	286103	Homo sapiens	CLIP-seq//Prediction	starBase//miRanda	None	0.6308
RAID00320956	hsa-miR-200a-3p	miRNA	MIMAT0000682	Homo sapiens	CECR7	lncRNA	100130418	Homo sapiens	CLIP-seq//Prediction	starBase//miRanda	None	0.6308
RAID00321429	hsa-miR-526b-5p	miRNA	MIMAT0002835	Homo sapiens	LINC00598	lncRNA	646982	Homo sapiens	PAR-CLIP	miRTarBase	22100165	0.5483
RAID00322969	hsa-miR-4699-3p	miRNA	MIMAT0019795	Homo sapiens	OIP5-AS1	lncRNA	729082	Homo sapiens	CLIP	NPInter	23846593	0.5483
RAID00323373	hsa-miR-18a-5p	miRNA	MIMAT0000072	Homo sapiens	HCP5	lncRNA	10866	Homo sapiens	CLIP-seq	starBase	None	0.5483
RAID00325503	hsa-miR-4667-5p	miRNA	MIMAT0019743	Homo sapiens	BCYRN1	lncRNA	618	Homo sapiens	CLIP	NPInter	23846593	0.5483
RAID00325553	hsa-miR-106a-5p	miRNA	MIMAT0000103	Homo sapiens	FLNB-AS1	lncRNA	100506906	Homo sapiens	CLIP	NPInter	25531890	0.5483
RAID00326492	hsa-miR-106a-5p	miRNA	MIMAT0000103	Homo sapiens	CECR7	lncRNA	100130418	Homo sapiens	CLIP	NPInter	25531890	0.5483
RAID00328292	hsa-miR-200a-3p	miRNA	MIMAT0000682	Homo sapiens	H19	lncRNA	283120	Homo sapiens	Western Blot//RT-PCR	LncRNA2Target	23222811	0.8808
RAID00328659	hsa-miR-342-3p	miRNA	MIMAT0000753	Homo sapiens	LINC00339	lncRNA	29092	Homo sapiens	CLIP-seq//Prediction	starBase//miRanda	None	0.6308
RAID00331630	hsa-miR-548x-5p	miRNA	MIMAT0022733	Homo sapiens	LINC00598	lncRNA	646982	Homo sapiens	PAR-CLIP	miRTarBase	22012620	0.5483
RAID00332913	hsa-miR-502-3p	miRNA	MIMAT0004775	Homo sapiens	LINC00955	lncRNA	285492	Homo sapiens	PAR-CLIP	miRTarBase	21572407	0.5483
RAID00334733	hsa-miR-212-5p	miRNA	MIMAT0022695	Homo sapiens	OIP5-AS1	lncRNA	729082	Homo sapiens	CLIP	NPInter	23846593	0.5483
RAID00335647	hsa-miR-98-5p	miRNA	MIMAT0000096	Homo sapiens	TUG1	lncRNA	55000	Homo sapiens	CLIP-seq//Prediction	starBase//miRanda	None	0.6308
RAID00335679	hsa-miR-466	miRNA	MIMAT0015002	Homo sapiens	XIST	lncRNA	7503	Homo sapiens	CLIP	NPInter	23846593	0.5483
RAID00336154	hsa-miR-371a-3p	miRNA	MIMAT0000723	Homo sapiens	WT1-AS	lncRNA	51352	Homo sapiens	CLIP	NPInter	23846593	0.5483
RAID00336343	hsa-miR-296-3p	miRNA	MIMAT0004679	Homo sapiens	SMA4	lncRNA	11039	Homo sapiens	CLIP-seq//Prediction	starBase//miRanda	None	0.6308
RAID00336887	hsa-miR-106a-5p	miRNA	MIMAT0000103	Homo sapiens	MIR99AHG	lncRNA	388815	Homo sapiens	CLIP	NPInter	25531890	0.5483
RAID00337895	hsa-miR-18b-5p	miRNA	MIMAT0001412	Homo sapiens	XIST	lncRNA	7503	Homo sapiens	CLIP	NPInter	23846593	0.5483
RAID00340707	hsa-miR-150-5p	miRNA	MIMAT0000451	Homo sapiens	DLEU1	lncRNA	10301	Homo sapiens	CLIP-seq//Prediction	starBase//miRanda	None	0.6308
RAID00340832	hsa-miR-106b-5p	miRNA	MIMAT0000680	Homo sapiens	PTENP1	lncRNA	11191	Homo sapiens	Reporter Assay//RT-PCR//Western Blot	RAID	20577206	0.9526
RAID00340911	hsa-miR-20b-5p	miRNA	MIMAT0001413	Homo sapiens	PVT1	lncRNA	5820	Homo sapiens	CLIP-seq//Prediction	starBase//miRanda	None	0.6308
RAID00342011	hsa-miR-33b-5p	miRNA	MIMAT0003301	Homo sapiens	JPX	lncRNA	554203	Homo sapiens	CLIP-seq//Prediction	starBase//miRanda	None	0.6308
RAID00345824	hsa-miR-4666a-3p	miRNA	MIMAT0019742	Homo sapiens	XIST	lncRNA	7503	Homo sapiens	CLIP	NPInter	23846593	0.5483
RAID00348154	hsa-miR-5585-3p	miRNA	MIMAT0022286	Homo sapiens	BCYRN1	lncRNA	618	Homo sapiens	CLIP	NPInter	23846593	0.5483
RAID00350062	hsa-miR-5002-5p	miRNA	MIMAT0021023	Homo sapiens	MIR155HG	lncRNA	114614	Homo sapiens	CLIP	NPInter	23846593	0.5483
RAID00350804	hsa-miR-25-3p	miRNA	MIMAT0000081	Homo sapiens	LINC00461	lncRNA	645323	Homo sapiens	CLIP//Prediction	NPInter//miRanda	23846593	0.6308
RAID00354055	hsa-miR-302b-3p	miRNA	MIMAT0000715	Homo sapiens	LINC00472	lncRNA	79940	Homo sapiens	CLIP-seq	starBase	None	0.5483
RAID00355345	hsa-let-7a-5p	miRNA	MIMAT0000062	Homo sapiens	ARRDC1-AS1	lncRNA	85026	Homo sapiens	CLASH	miRTarBase	23622248	0.5483
RAID00358164	hsa-miR-4307	miRNA	MIMAT0016860	Homo sapiens	LINC00598	lncRNA	646982	Homo sapiens	PAR-CLIP	miRTarBase	22100165	0.5483
RAID00361471	hsa-miR-186-5p	miRNA	MIMAT0000456	Homo sapiens	DLEU1	lncRNA	10301	Homo sapiens	CLIP-seq//Prediction	starBase//miRanda	None	0.6308
RAID00362546	hsa-miR-339-5p	miRNA	MIMAT0000764	Homo sapiens	DLEU1	lncRNA	10301	Homo sapiens	CLIP-seq	starBase	None	0.5483
RAID00362906	hsa-miR-98-5p	miRNA	MIMAT0000096	Homo sapiens	TINCR	lncRNA	257000	Homo sapiens	CLIP-seq	starBase	None	0.5483
RAID00363905	hsa-miR-490-3p	miRNA	MIMAT0002806	Homo sapiens	SNHG20	lncRNA	654434	Homo sapiens	CLIP-seq//Prediction	starBase//miRanda	None	0.6308
RAID00364154	hsa-miR-335-5p	miRNA	MIMAT0000765	Homo sapiens	TUG1	lncRNA	55000	Homo sapiens	CLIP-seq//Prediction	starBase//miRanda	None	0.6308
RAID00364789	hsa-miR-124-3p	miRNA	MIMAT0000422	Homo sapiens	SND1-IT1	lncRNA	27099	Homo sapiens	CLIP-seq//Prediction	starBase//miRanda	None	0.6308
RAID00365703	hsa-miR-6788-5p	miRNA	MIMAT0027476	Homo sapiens	LINC00598	lncRNA	646982	Homo sapiens	CLIP-seq	miRTarBase	23824327	0.5483
RAID00365798	ebv-miR-BART2-5p	miRNA	MIMAT0001000	Human herpesvirus 4	PTENP1	lncRNA	11191	Homo sapiens	PAR-CLIP	ViRBase	22100165	0.5483
RAID00370550	hsa-miR-106a-5p	miRNA	MIMAT0000103	Homo sapiens	SLC25A5-AS1	lncRNA	100303728	Homo sapiens	CLIP	NPInter	25531890	0.5483
RAID00372150	hsa-miR-21-5p	miRNA	MIMAT0000076	Homo sapiens	PTENP1	lncRNA	11191	Homo sapiens	RT-PCR//Reporter Assay//Western Blot	RAID	25249556	0.9526
RAID00372664	hsa-miR-3614-3p	miRNA	MIMAT0017993	Homo sapiens	MIR155HG	lncRNA	114614	Homo sapiens	CLIP	NPInter	23846593	0.5483
RAID00373713	hsa-miR-3925-5p	miRNA	MIMAT0018200	Homo sapiens	XIST	lncRNA	7503	Homo sapiens	CLIP	NPInter	23846593	0.5483
RAID00374170	hsa-miR-612	miRNA	MIMAT0003280	Homo sapiens	LINC00346	lncRNA	283487	Homo sapiens	CLIP-seq	miRTarBase	23824327	0.5483
RAID00377900	hsa-miR-4463	miRNA	MIMAT0018987	Homo sapiens	XIST	lncRNA	7503	Homo sapiens	CLIP	NPInter	23846593	0.5483
RAID00379213	hsa-miR-106a-5p	miRNA	MIMAT0000103	Homo sapiens	PDXDC2P	lncRNA	283970	Homo sapiens	CLIP	NPInter	25531890	0.5483
RAID00379625	hsa-miR-548y	miRNA	MIMAT0018354	Homo sapiens	OIP5-AS1	lncRNA	729082	Homo sapiens	CLIP	NPInter	23846593	0.5483
RAID00380400	hsa-miR-5196-5p	miRNA	MIMAT0021128	Homo sapiens	MALAT1	lncRNA	378938	Homo sapiens	CLIP	NPInter	23846593	0.5483
RAID00381744	hsa-miR-29c-3p	miRNA	MIMAT0000681	Homo sapiens	SIRT1-AS	lncRNA	106633813	Homo sapiens	RT-PCR	RAID	26324025	0.7311
RAID00382313	hsa-miR-32-5p	miRNA	MIMAT0000090	Homo sapiens	IPW	lncRNA	3653	Homo sapiens	CLIP-seq//Prediction	starBase//miRanda	None	0.6308
RAID00383118	hsa-miR-549a	miRNA	MIMAT0003333	Homo sapiens	OIP5-AS1	lncRNA	729082	Homo sapiens	CLIP	NPInter	23846593	0.5483
RAID00383293	hsa-miR-18a-5p	miRNA	MIMAT0000072	Homo sapiens	GAS5	lncRNA	60674	Homo sapiens	CLIP	NPInter	23846593	0.5483
RAID00383742	hsa-miR-3145-3p	miRNA	MIMAT0015016	Homo sapiens	XIST	lncRNA	7503	Homo sapiens	CLIP	NPInter	23846593	0.5483
RAID00383994	hsa-miR-34c-5p	miRNA	MIMAT0000686	Homo sapiens	LINC01547	lncRNA	84536	Homo sapiens	CLIP-seq//Prediction	starBase//miRanda	None	0.6308
RAID00385715	hsa-miR-200c-3p	miRNA	MIMAT0000617	Homo sapiens	DLEU1	lncRNA	10301	Homo sapiens	CLIP-seq//Prediction	starBase//miRanda	None	0.6308
RAID00386731	mmu-miR-93-5p	miRNA	MIMAT0000540	Mus musculus	BC029722	lncRNA	613262	Mus musculus	CLIP-seq	starBase	None	0.5483
RAID00387520	hsa-miR-106a-5p	miRNA	MIMAT0000103	Homo sapiens	PABPC5-AS1	lncRNA	102724167	Homo sapiens	CLIP	NPInter	25531890	0.5483
RAID00388822	hsa-miR-382-5p	miRNA	MIMAT0000737	Homo sapiens	IPW	lncRNA	3653	Homo sapiens	CLIP-seq//Prediction	starBase//miRanda	None	0.6308
RAID00389930	hsa-miR-4300	miRNA	MIMAT0016853	Homo sapiens	LINC00346	lncRNA	283487	Homo sapiens	CLIP-seq	miRTarBase	23824327	0.5483
RAID00390253	hsa-miR-135a-5p	miRNA	MIMAT0000428	Homo sapiens	OLMALINC	lncRNA	90271	Homo sapiens	CLIP-seq//Prediction	starBase//miRanda	None	0.6308
RAID00390732	hsa-miR-204-5p	miRNA	MIMAT0000265	Homo sapiens	EPB41L4A-AS1	lncRNA	114915	Homo sapiens	CLIP-seq//Prediction	starBase//miRanda	None	0.6308
RAID00391013	hsa-miR-512-3p	miRNA	MIMAT0002823	Homo sapiens	XIST	lncRNA	7503	Homo sapiens	CLIP	NPInter	23846593	0.5483
RAID00391265	hsa-miR-4728-3p	miRNA	MIMAT0019850	Homo sapiens	MALAT1	lncRNA	378938	Homo sapiens	CLIP	NPInter	23846593	0.5483
RAID00392196	hsa-miR-92a-3p	miRNA	MIMAT0000092	Homo sapiens	MALAT1	lncRNA	378938	Homo sapiens	CLIP	NPInter	23846593	0.5483
RAID00392334	hsa-miR-3199	miRNA	MIMAT0015084	Homo sapiens	XIST	lncRNA	7503	Homo sapiens	CLIP	NPInter	23846593	0.5483
RAID00394671	hsa-miR-199a-5p	miRNA	MIMAT0000231	Homo sapiens	ZNF833P	lncRNA	401898	Homo sapiens	CLIP-seq//Prediction	starBase//miRanda	None	0.6308
RAID00397741	hsa-miR-125a-3p	miRNA	MIMAT0004602	Homo sapiens	ZNF833P	lncRNA	401898	Homo sapiens	CLIP-seq//Prediction	starBase//miRanda	None	0.6308
RAID00397813	hsa-miR-296-5p	miRNA	MIMAT0000690	Homo sapiens	TINCR	lncRNA	257000	Homo sapiens	CLIP-seq	starBase	None	0.5483
RAID00403100	hsa-miR-191-3p	miRNA	MIMAT0001618	Homo sapiens	DLEU1	lncRNA	10301	Homo sapiens	CLIP-seq	starBase	None	0.5483
RAID00403108	hsa-let-7d-5p	miRNA	MIMAT0000065	Homo sapiens	CTBP1-AS2	lncRNA	92070	Homo sapiens	CLIP-seq	starBase	None	0.5483
RAID00411968	hsa-miR-559	miRNA	MIMAT0003223	Homo sapiens	MALAT1	lncRNA	378938	Homo sapiens	CLIP	NPInter	23846593	0.5483
RAID00414339	hsa-miR-526b-3p	miRNA	MIMAT0002836	Homo sapiens	LINC00598	lncRNA	646982	Homo sapiens	CLIP-seq	miRTarBase	23313552	0.5483
RAID00415107	hsa-miR-134-5p	miRNA	MIMAT0000447	Homo sapiens	CTBP1-AS2	lncRNA	92070	Homo sapiens	CLIP-seq//Prediction	starBase//miRanda	None	0.6308
RAID00418706	hsa-miR-190b	miRNA	MIMAT0004929	Homo sapiens	PVT1	lncRNA	5820	Homo sapiens	CLIP-seq//Prediction	starBase//miRanda	None	0.6308
RAID00420680	hsa-miR-590-3p	miRNA	MIMAT0004801	Homo sapiens	LINC00632	lncRNA	286411	Homo sapiens	CLIP-seq	miRTarBase	23313552	0.5483
RAID00421206	hsa-miR-4643	miRNA	MIMAT0019703	Homo sapiens	MALAT1	lncRNA	378938	Homo sapiens	CLIP	NPInter	23846593	0.5483
RAID00422635	hsa-miR-6500-3p	miRNA	MIMAT0025455	Homo sapiens	BDNF-AS	lncRNA	497258	Homo sapiens	PAR-CLIP	miRTarBase	23592263	0.5483
RAID00422668	hsa-miR-202-3p	miRNA	MIMAT0002811	Homo sapiens	LRRC75A-AS1	lncRNA	125144	Homo sapiens	CLIP-seq	starBase	None	0.5483
RAID00425171	hsa-let-7g-5p	miRNA	MIMAT0000414	Homo sapiens	TINCR	lncRNA	257000	Homo sapiens	CLIP-seq	starBase	None	0.5483
RAID00427394	hsa-miR-621	miRNA	MIMAT0003290	Homo sapiens	HNRNPU	lncRNA	3192	Homo sapiens	CLIP	NPInter	23846593	0.5483
RAID00432138	hsa-miR-199b-5p	miRNA	MIMAT0000263	Homo sapiens	TP73-AS1	lncRNA	57212	Homo sapiens	CLIP-seq	starBase	None	0.5483
RAID00432302	mmu-miR-210-3p	miRNA	MIMAT0000658	Mus musculus	D330041H03Rik	lncRNA	654822	Mus musculus	CLIP-seq	starBase	None	0.5483
RAID00434451	hsa-let-7a-5p	miRNA	MIMAT0000062	Homo sapiens	HOXA11-AS	lncRNA	221883	Homo sapiens	CLIP-seq//Prediction	starBase//miRanda	None	0.6308
RAID00435639	hsa-miR-4789-3p	miRNA	MIMAT0019960	Homo sapiens	XIST	lncRNA	7503	Homo sapiens	CLIP	NPInter	23846593	0.5483
RAID00439027	hsa-miR-2861	miRNA	MIMAT0013802	Homo sapiens	BCYRN1	lncRNA	618	Homo sapiens	CLIP	NPInter	23846593	0.5483
RAID00439265	hsa-miR-548g-3p	miRNA	MIMAT0005912	Homo sapiens	GAS5	lncRNA	60674	Homo sapiens	CLIP	NPInter	23846593	0.5483
RAID00440087	hsa-miR-422a	miRNA	MIMAT0001339	Homo sapiens	H19	lncRNA	283120	Homo sapiens	CLIP-seq//Prediction	starBase//miRanda	None	0.6308
RAID00441753	hsa-miR-1277-5p	miRNA	MIMAT0022724	Homo sapiens	OIP5-AS1	lncRNA	729082	Homo sapiens	CLIP	NPInter	23846593	0.5483
RAID00445209	hsa-miR-518a-5p	miRNA	MIMAT0005457	Homo sapiens	MALAT1	lncRNA	378938	Homo sapiens	CLIP	NPInter	23846593	0.5483
RAID00445438	hsa-miR-98-5p	miRNA	MIMAT0000096	Homo sapiens	CDKN2B-AS1	lncRNA	100048912	Homo sapiens	CLIP-seq//Prediction	starBase//miRanda	None	0.6308
RAID00446160	hsa-miR-526b-5p	miRNA	MIMAT0002835	Homo sapiens	SNHG1	lncRNA	23642	Homo sapiens	CLIP	NPInter	23846593	0.5483
RAID00446471	hsa-miR-4706	miRNA	MIMAT0019806	Homo sapiens	WT1-AS	lncRNA	51352	Homo sapiens	CLIP	NPInter	23846593	0.5483
RAID00448172	hsa-miR-1587	miRNA	MIMAT0019077	Homo sapiens	HOXA10-AS	lncRNA	100874323	Homo sapiens	CLIP	NPInter	23846593	0.5483
RAID00448650	hsa-miR-30d-5p	miRNA	MIMAT0000245	Homo sapiens	DGCR5	lncRNA	26220	Homo sapiens	CLIP-seq//Prediction	starBase//miRanda	None	0.6308
RAID00455352	hsa-miR-526a	miRNA	MIMAT0002845	Homo sapiens	MAPKAPK5-AS1	lncRNA	51275	Homo sapiens	CLIP-seq	starBase	None	0.5483
RAID00455370	hsa-miR-27b-5p	miRNA	MIMAT0004588	Homo sapiens	BCYRN1	lncRNA	618	Homo sapiens	CLIP	NPInter	23846593	0.5483
RAID00455889	hsa-miR-539-5p	miRNA	MIMAT0003163	Homo sapiens	HNRNPU	lncRNA	3192	Homo sapiens	CLIP	NPInter	23846593	0.5483
RAID00457627	hsa-miR-145-5p	miRNA	MIMAT0000437	Homo sapiens	MALAT1	lncRNA	378938	Homo sapiens	RIP (RNA Immunoprecipitation)//RT-PCR//Pull down Assay//CLIP	RAID//NPInter	26311052//23846593	0.9786
RAID00458276	hsa-miR-2115-3p	miRNA	MIMAT0011159	Homo sapiens	HNRNPU	lncRNA	3192	Homo sapiens	CLIP	NPInter	23846593	0.5483
RAID00458722	hsa-miR-200b-3p	miRNA	MIMAT0000318	Homo sapiens	MCM3AP-AS1	lncRNA	114044	Homo sapiens	CLIP-seq//Prediction	starBase//miRanda	None	0.6308
RAID00460034	hsa-miR-4419b	miRNA	MIMAT0019034	Homo sapiens	LINC00346	lncRNA	283487	Homo sapiens	CLIP-seq	miRTarBase	23824327	0.5483
RAID00461415	hsa-miR-4671-3p	miRNA	MIMAT0019753	Homo sapiens	BCYRN1	lncRNA	618	Homo sapiens	CLIP	NPInter	23846593	0.5483
RAID00463561	hsa-miR-613	miRNA	MIMAT0003281	Homo sapiens	SNHG4	lncRNA	724102	Homo sapiens	CLIP-seq//Prediction	starBase//miRanda	None	0.6308
RAID00463667	hsa-miR-106a-5p	miRNA	MIMAT0000103	Homo sapiens	BSN-AS2	lncRNA	100132677	Homo sapiens	CLIP	NPInter	25531890	0.5483
RAID00466128	hsa-miR-135b-5p	miRNA	MIMAT0000758	Homo sapiens	DANCR	lncRNA	57291	Homo sapiens	CLIP-seq//Prediction	starBase//miRanda	None	0.6308
RAID00467308	hsa-miR-298	miRNA	MIMAT0004901	Homo sapiens	LINC00598	lncRNA	646982	Homo sapiens	PAR-CLIP	miRTarBase	22100165	0.5483
RAID00469407	mmu-miR-196b-5p	miRNA	MIMAT0001081	Mus musculus	AI504432	lncRNA	229694	Mus musculus	CLIP-seq	starBase	None	0.5483
RAID00470613	hsa-miR-150-5p	miRNA	MIMAT0000451	Homo sapiens	LINC00598	lncRNA	646982	Homo sapiens	CLIP-seq	miRTarBase	23313552	0.5483
RAID00472551	hsa-miR-7106-5p	miRNA	MIMAT0028109	Homo sapiens	LINC00598	lncRNA	646982	Homo sapiens	CLIP-seq	miRTarBase	23824327	0.5483
RAID00474048	hsa-miR-370-3p	miRNA	MIMAT0000722	Homo sapiens	FOXO3B	lncRNA	2310	Homo sapiens	CLIP-seq	starBase	None	0.5483
RAID00474480	hsa-miR-1307-3p	miRNA	MIMAT0005951	Homo sapiens	LINC00598	lncRNA	646982	Homo sapiens	CLIP-seq	miRTarBase	23824327	0.5483
RAID00480737	hsa-miR-106a-5p	miRNA	MIMAT0000103	Homo sapiens	TM4SF1-AS1	lncRNA	100874091	Homo sapiens	CLIP	NPInter	25531890	0.5483
RAID00482182	hsa-miR-548az-3p	miRNA	MIMAT0025457	Homo sapiens	MALAT1	lncRNA	378938	Homo sapiens	CLIP	NPInter	23846593	0.5483
RAID00485573	hsa-miR-497-3p	miRNA	MIMAT0004768	Homo sapiens	LINC00461	lncRNA	645323	Homo sapiens	CLIP	NPInter	23846593	0.5483
RAID00486391	hsa-miR-26a-5p	miRNA	MIMAT0000082	Homo sapiens	HEXA-AS1	lncRNA	80072	Homo sapiens	CLIP-seq	starBase	None	0.5483
RAID00489268	hsa-miR-511-5p	miRNA	MIMAT0002808	Homo sapiens	HNRNPU	lncRNA	3192	Homo sapiens	CLIP	NPInter	23846593	0.5483
RAID00490422	hsa-miR-4517	miRNA	MIMAT0019054	Homo sapiens	XIST	lncRNA	7503	Homo sapiens	CLIP	NPInter	23846593	0.5483
RAID00492246	hsa-miR-424-5p	miRNA	MIMAT0001341	Homo sapiens	PVT1	lncRNA	5820	Homo sapiens	CLIP-seq//Prediction	starBase//miRanda	None	0.6308
RAID00493347	hsa-miR-3613-3p	miRNA	MIMAT0017991	Homo sapiens	HNRNPU	lncRNA	3192	Homo sapiens	CLIP	NPInter	23846593	0.5483
RAID00493690	hsa-miR-4540	miRNA	MIMAT0019083	Homo sapiens	OIP5-AS1	lncRNA	729082	Homo sapiens	CLIP	NPInter	23846593	0.5483
RAID00494411	hsa-mir-135a-2	miRNA	MI0000453	Homo sapiens	LINCMD1	lncRNA	101154644	Homo sapiens	ChIP (chromatin immunoprecipitation assay)	NPInter	22000014	0.5483
RAID00495606	mmu-let-7d-5p	miRNA	MIMAT0000383	Mus musculus	AI504432	lncRNA	229694	Mus musculus	CLIP-seq	starBase	None	0.5483
RAID00495616	hsa-miR-23a-3p	miRNA	MIMAT0000078	Homo sapiens	BCYRN1	lncRNA	618	Homo sapiens	CLIP	NPInter	23846593	0.5483
RAID00496083	hsa-miR-149-3p	miRNA	MIMAT0004609	Homo sapiens	LINC00598	lncRNA	646982	Homo sapiens	CLIP-seq	miRTarBase	23824327	0.5483
RAID00496492	hsa-miR-4518	miRNA	MIMAT0019055	Homo sapiens	LINC00598	lncRNA	646982	Homo sapiens	CLIP-seq	miRTarBase	23824327	0.5483
RAID00497026	hsa-miR-525-5p	miRNA	MIMAT0002838	Homo sapiens	MAPKAPK5-AS1	lncRNA	51275	Homo sapiens	CLIP-seq	starBase	None	0.5483
RAID00498685	hsa-miR-196b-5p	miRNA	MIMAT0001080	Homo sapiens	HOXA10-AS	lncRNA	100874323	Homo sapiens	CLIP	NPInter	23846593	0.5483
RAID00499437	hsa-miR-34c-5p	miRNA	MIMAT0000686	Homo sapiens	IDI2-AS1	lncRNA	55853	Homo sapiens	CLIP-seq	starBase	None	0.5483
RAID00500482	hsa-miR-1224-3p	miRNA	MIMAT0005459	Homo sapiens	MIR22HG	lncRNA	84981	Homo sapiens	CLIP	NPInter	23846593	0.5483
RAID00502757	hsa-miR-520b	miRNA	MIMAT0002843	Homo sapiens	MORC2-AS1	lncRNA	150291	Homo sapiens	CLIP-seq//Prediction	starBase//miRanda	None	0.6308
RAID00504681	hsa-miR-320d	miRNA	MIMAT0006764	Homo sapiens	LINC00341	lncRNA	79686	Homo sapiens	CLIP-seq//Prediction	starBase//miRanda	None	0.6308
RAID00507470	hsa-miR-3618	miRNA	MIMAT0017998	Homo sapiens	LINC00461	lncRNA	645323	Homo sapiens	CLIP	NPInter	23846593	0.5483
RAID00507580	hsa-miR-106a-5p	miRNA	MIMAT0000103	Homo sapiens	TTTY15	lncRNA	64595	Homo sapiens	CLIP	NPInter	25531890	0.5483
RAID00507716	hsa-miR-15a-5p	miRNA	MIMAT0000068	Homo sapiens	BCYRN1	lncRNA	618	Homo sapiens	CLIP	NPInter	23846593	0.5483
RAID00510942	hsa-miR-302b-3p	miRNA	MIMAT0000715	Homo sapiens	XIST	lncRNA	7503	Homo sapiens	CLIP	NPInter	23846593	0.5483
RAID00513802	hsa-let-7f-5p	miRNA	MIMAT0000067	Homo sapiens	TUG1	lncRNA	55000	Homo sapiens	CLIP-seq//Prediction	starBase//miRanda	None	0.6308
RAID00513886	hsa-miR-3714	miRNA	MIMAT0018165	Homo sapiens	DLEU1	lncRNA	10301	Homo sapiens	CLIP-seq	miRTarBase	19536157	0.5483
RAID00514755	hsa-miR-30d-5p	miRNA	MIMAT0000245	Homo sapiens	MALAT1	lncRNA	378938	Homo sapiens	CLIP	NPInter	23846593	0.5483
RAID00516411	hsa-miR-186-5p	miRNA	MIMAT0000456	Homo sapiens	PVT1	lncRNA	5820	Homo sapiens	CLIP-seq//Prediction	starBase//miRanda	None	0.6308
RAID00518968	hsa-miR-130b-3p	miRNA	MIMAT0000691	Homo sapiens	LINC00339	lncRNA	29092	Homo sapiens	CLIP-seq//Prediction	starBase//miRanda	None	0.6308
RAID00520700	hsa-miR-3922-3p	miRNA	MIMAT0018197	Homo sapiens	LINC00598	lncRNA	646982	Homo sapiens	CLIP-seq	miRTarBase	19536157	0.5483
RAID00521279	hsa-miR-212-3p	miRNA	MIMAT0000269	Homo sapiens	XIST	lncRNA	7503	Homo sapiens	IP (immunoprecipitation)//Reporter Assay//RT-PCR	RAID	19826008	0.9526
RAID00522715	hsa-miR-335-5p	miRNA	MIMAT0000765	Homo sapiens	MIR7-3HG	lncRNA	284424	Homo sapiens	Microarray//Prediction	miRTarBase//miRanda	18185580	0.6308
RAID00522929	hsa-miR-106a-5p	miRNA	MIMAT0000103	Homo sapiens	ANKRD10-IT1	lncRNA	100505494	Homo sapiens	CLIP	NPInter	25531890	0.5483
RAID00523862	hsa-miR-550a-3p	miRNA	MIMAT0003257	Homo sapiens	OIP5-AS1	lncRNA	729082	Homo sapiens	CLIP	NPInter	23846593	0.5483
RAID00524123	hsa-miR-612	miRNA	MIMAT0003280	Homo sapiens	MIR22HG	lncRNA	84981	Homo sapiens	CLIP	NPInter	23846593	0.5483
RAID00525058	hsa-miR-7-5p	miRNA	MIMAT0000252	Homo sapiens	LINC00852	lncRNA	84657	Homo sapiens	CLIP-seq//Prediction	starBase//miRanda	None	0.6308
RAID00525966	hsa-miR-373-3p	miRNA	MIMAT0000726	Homo sapiens	TP73-AS1	lncRNA	57212	Homo sapiens	CLIP-seq	starBase	None	0.5483
RAID00529282	hsa-miR-96-5p	miRNA	MIMAT0000095	Homo sapiens	RPS10P7	lncRNA	376693	Homo sapiens	CLIP-seq//Prediction	starBase//miRanda	None	0.6308
RAID00530742	hsa-miR-767-3p	miRNA	MIMAT0003883	Homo sapiens	LINC00598	lncRNA	646982	Homo sapiens	CLIP-seq	miRTarBase	23824327	0.5483
RAID00530941	hsa-miR-5001-3p	miRNA	MIMAT0021022	Homo sapiens	LINC00598	lncRNA	646982	Homo sapiens	CLIP-seq	miRTarBase	23313552	0.5483
RAID00533605	hsa-miR-365b-5p	miRNA	MIMAT0022833	Homo sapiens	XIST	lncRNA	7503	Homo sapiens	CLIP	NPInter	23846593	0.5483
RAID00537099	hsa-miR-186-5p	miRNA	MIMAT0000456	Homo sapiens	HCP5	lncRNA	10866	Homo sapiens	CLIP-seq//Prediction	starBase//miRanda	None	0.6308
RAID00538891	hsa-miR-21-5p	miRNA	MIMAT0000076	Homo sapiens	GAS5	lncRNA	60674	Homo sapiens	Western Blot//RT-PCR	LncRNA2Target//ncRDeathDB2.0//miRTarBase	25196583//23933812	0.8808
RAID00542380	hsa-miR-519d-3p	miRNA	MIMAT0002853	Homo sapiens	WHAMMP2	lncRNA	440253	Homo sapiens	CLIP-seq//Prediction	starBase//miRanda	None	0.6308
RAID00544644	hsa-miR-5684	miRNA	MIMAT0022473	Homo sapiens	HNRNPU	lncRNA	3192	Homo sapiens	CLIP	NPInter	23846593	0.5483
RAID00544908	hsa-miR-3127-5p	miRNA	MIMAT0014990	Homo sapiens	SNHG1	lncRNA	23642	Homo sapiens	CLIP	NPInter	23846593	0.5483
RAID00547104	hsa-miR-936	miRNA	MIMAT0004979	Homo sapiens	LINC00346	lncRNA	283487	Homo sapiens	CLIP-seq	miRTarBase	23824327	0.5483
RAID00548899	hsa-miR-326	miRNA	MIMAT0000756	Homo sapiens	HOTAIR	lncRNA	100124700	Homo sapiens	RT-PCR//Reporter Assay//Western Blot	RAID	26183397	0.9526
RAID00550182	mmu-miR-196a-5p	miRNA	MIMAT0000518	Mus musculus	AI504432	lncRNA	229694	Mus musculus	CLIP-seq//Prediction	starBase//miRanda	None	0.6308
RAID00553639	hsa-miR-194-5p	miRNA	MIMAT0000460	Homo sapiens	TEX41	lncRNA	401014	Homo sapiens	CLIP-seq//Prediction	starBase//miRanda	None	0.6308
RAID00557683	hsa-miR-20b-5p	miRNA	MIMAT0001413	Homo sapiens	PTENP1	lncRNA	11191	Homo sapiens	CLIP-seq//Prediction	starBase//miRanda	None	0.6308
RAID00557822	hsa-miR-149-5p	miRNA	MIMAT0000450	Homo sapiens	LRRC75A-AS1	lncRNA	125144	Homo sapiens	CLIP-seq//Prediction	starBase//miRanda	None	0.6308
RAID00558861	hsa-miR-3192-5p	miRNA	MIMAT0015076	Homo sapiens	SNHG3	lncRNA	8420	Homo sapiens	CLIP	NPInter	23846593	0.5483
RAID00559107	hsa-miR-141-5p	miRNA	MIMAT0004598	Homo sapiens	BCYRN1	lncRNA	618	Homo sapiens	CLIP	NPInter	23846593	0.5483
RAID00560661	hsa-miR-155-5p	miRNA	MIMAT0000646	Homo sapiens	MCM3AP-AS1	lncRNA	114044	Homo sapiens	CLIP-seq//Prediction	starBase//miRanda	None	0.6308
RAID00560901	hsa-miR-106a-5p	miRNA	MIMAT0000103	Homo sapiens	PRKAR2A-AS1	lncRNA	100506637	Homo sapiens	CLIP	NPInter	25531890	0.5483
RAID00562681	hsa-miR-320a	miRNA	MIMAT0000510	Homo sapiens	LOC93622	lncRNA	93622	Homo sapiens	CLIP-seq//Prediction	starBase//miRanda	None	0.6308
RAID00562795	hsa-miR-374a-5p	miRNA	MIMAT0000727	Homo sapiens	TUG1	lncRNA	55000	Homo sapiens	CLIP-seq//Prediction	starBase//miRanda	None	0.6308
RAID00564068	hsa-miR-381-3p	miRNA	MIMAT0000736	Homo sapiens	BCYRN1	lncRNA	618	Homo sapiens	CLIP	NPInter	23846593	0.5483
RAID00565445	hsa-miR-16-5p	miRNA	MIMAT0000069	Homo sapiens	EPB41L4A-AS1	lncRNA	114915	Homo sapiens	CLIP-seq//Prediction	starBase//miRanda	None	0.6308
RAID00566128	hsa-miR-4753-5p	miRNA	MIMAT0019890	Homo sapiens	MALAT1	lncRNA	378938	Homo sapiens	CLIP	NPInter	23846593	0.5483
RAID00566755	hsa-miR-34a-5p	miRNA	MIMAT0000255	Homo sapiens	CDK4PS	lncRNA	359941	Homo sapiens	Reporter Assay//RT-PCR	RAID	20577206	0.8808
RAID00567986	hsa-miR-450a-5p	miRNA	MIMAT0001545	Homo sapiens	SND1-IT1	lncRNA	27099	Homo sapiens	CLIP-seq//Prediction	starBase//miRanda	None	0.6308
RAID00568077	hsa-miR-664b-5p	miRNA	MIMAT0022271	Homo sapiens	XIST	lncRNA	7503	Homo sapiens	CLIP	NPInter	23846593	0.5483
RAID00568685	hsa-miR-520f-3p	miRNA	MIMAT0002830	Homo sapiens	TP73-AS1	lncRNA	57212	Homo sapiens	CLIP-seq	starBase	None	0.5483
RAID00568763	hsa-miR-92b-3p	miRNA	MIMAT0003218	Homo sapiens	OIP5-AS1	lncRNA	729082	Homo sapiens	CLIP	NPInter	23846593	0.5483
RAID00570560	hsa-miR-98-5p	miRNA	MIMAT0000096	Homo sapiens	SNHG4	lncRNA	724102	Homo sapiens	CLIP-seq//Prediction	starBase//miRanda	None	0.6308
RAID00572582	hsa-miR-142-3p	miRNA	MIMAT0000434	Homo sapiens	JPX	lncRNA	554203	Homo sapiens	CLIP-seq//Prediction	starBase//miRanda	None	0.6308
RAID00573432	hsa-miR-216b-5p	miRNA	MIMAT0004959	Homo sapiens	LOC645166	lncRNA	645166	Homo sapiens	CLIP-seq//Prediction	starBase//miRanda	None	0.6308
RAID00573495	hsa-miR-19b-3p	miRNA	MIMAT0000074	Homo sapiens	LOC90246	lncRNA	90246	Homo sapiens	CLIP-seq//Prediction	starBase//miRanda	None	0.6308
RAID00573728	hsa-miR-326	miRNA	MIMAT0000756	Homo sapiens	LRRC75A-AS1	lncRNA	125144	Homo sapiens	CLIP-seq//Prediction	starBase//miRanda	None	0.6308
RAID00573797	hsa-miR-4700-5p	miRNA	MIMAT0019796	Homo sapiens	BCYRN1	lncRNA	618	Homo sapiens	CLIP	NPInter	23846593	0.5483
RAID00574578	hsa-miR-199a-3p	miRNA	MIMAT0000232	Homo sapiens	LINC00346	lncRNA	283487	Homo sapiens	CLIP-seq	miRTarBase	23824327	0.5483
RAID00574856	hsa-miR-1266-5p	miRNA	MIMAT0005920	Homo sapiens	BCYRN1	lncRNA	618	Homo sapiens	CLIP	NPInter	23846593	0.5483
RAID00575689	hsa-miR-4767	miRNA	MIMAT0019919	Homo sapiens	LOC100129973	lncRNA	100129973	Homo sapiens	RT-PCR//RIP-ChIP	RAID	26887505	0.8785
RAID00576069	hsa-miR-3197	miRNA	MIMAT0015082	Homo sapiens	WT1-AS	lncRNA	51352	Homo sapiens	CLIP	NPInter	23846593	0.5483
RAID00578693	hsa-miR-3940-5p	miRNA	MIMAT0019229	Homo sapiens	BCYRN1	lncRNA	618	Homo sapiens	CLIP	NPInter	23846593	0.5483
RAID00581880	hsa-miR-26b-5p	miRNA	MIMAT0000083	Homo sapiens	PTENP1	lncRNA	11191	Homo sapiens	Reporter Assay//RT-PCR//Western Blot	RAID	20577206	0.9526
RAID00582309	hsa-miR-6778-3p	miRNA	MIMAT0027457	Homo sapiens	LINC00598	lncRNA	646982	Homo sapiens	CLIP-seq	miRTarBase	23313552	0.5483
RAID00583433	hsa-miR-106a-5p	miRNA	MIMAT0000103	Homo sapiens	FLG-AS1	lncRNA	339400	Homo sapiens	CLIP	NPInter	25531890	0.5483
RAID00584570	hsa-miR-4691-5p	miRNA	MIMAT0019781	Homo sapiens	MALAT1	lncRNA	378938	Homo sapiens	CLIP	NPInter	23846593	0.5483
RAID00588457	hsa-miR-196a-5p	miRNA	MIMAT0000226	Homo sapiens	TP73-AS1	lncRNA	57212	Homo sapiens	CLIP-seq//Prediction	starBase//miRanda	None	0.6308
RAID00589453	hsa-miR-4784	miRNA	MIMAT0019948	Homo sapiens	BDNF-AS	lncRNA	497258	Homo sapiens	PAR-CLIP	miRTarBase	23592263	0.5483
RAID00590524	hsa-miR-106a-5p	miRNA	MIMAT0000103	Homo sapiens	ENO1-IT1	lncRNA	106480431	Homo sapiens	CLIP	NPInter	25531890	0.5483
RAID00591926	hsa-miR-30b-3p	miRNA	MIMAT0004589	Homo sapiens	SNHG3	lncRNA	8420	Homo sapiens	CLIP	NPInter	23846593	0.5483
RAID00592559	hsa-miR-203a-3p	miRNA	MIMAT0000264	Homo sapiens	LOC389641	lncRNA	389641	Homo sapiens	CLIP-seq//Prediction	starBase//miRanda	None	0.6308
RAID00594046	hsa-miR-195-5p	miRNA	MIMAT0000461	Homo sapiens	PVT1	lncRNA	5820	Homo sapiens	CLIP-seq//Prediction	starBase//miRanda	None	0.6308
RAID00598761	hsa-miR-4652-5p	miRNA	MIMAT0019716	Homo sapiens	WT1-AS	lncRNA	51352	Homo sapiens	CLIP	NPInter	23846593	0.5483
RAID00599169	hsa-miR-106a-5p	miRNA	MIMAT0000103	Homo sapiens	ALMS1-IT1	lncRNA	100874291	Homo sapiens	CLIP	NPInter	25531890	0.5483
RAID00599220	hsa-miR-449c-5p	miRNA	MIMAT0010251	Homo sapiens	HNRNPU	lncRNA	3192	Homo sapiens	CLIP	NPInter	23846593	0.5483
RAID00600916	hsa-miR-6788-5p	miRNA	MIMAT0027476	Homo sapiens	LINC00346	lncRNA	283487	Homo sapiens	CLIP-seq	miRTarBase	23824327	0.5483
RAID00601308	mmu-miR-491-5p	miRNA	MIMAT0003486	Mus musculus	Atp10d	lncRNA	231287	Mus musculus	CLIP-seq	starBase	None	0.5483
RAID00601562	hsa-miR-503-5p	miRNA	MIMAT0002874	Homo sapiens	MALAT1	lncRNA	378938	Homo sapiens	CLIP	NPInter	23846593	0.5483
RAID00601630	hsa-let-7a-5p	miRNA	MIMAT0000062	Homo sapiens	MGC12916	lncRNA	84815	Homo sapiens	CLIP-seq//Prediction	starBase//miRanda	None	0.6308
RAID00601920	hsa-miR-526b-5p	miRNA	MIMAT0002835	Homo sapiens	IDI2-AS1	lncRNA	55853	Homo sapiens	CLIP-seq	starBase	None	0.5483
RAID00602788	hsa-miR-331-3p	miRNA	MIMAT0000760	Homo sapiens	HOTAIR	lncRNA	100124700	Homo sapiens	Western Blot//FACS (fluorescence-activated cell sorting)//Reporter Assay//RT-PCR//IHC (Immunohistochemistry)	miRTarBase//NPInter	24775712	0.9933
RAID00603852	hsa-miR-4763-3p	miRNA	MIMAT0019913	Homo sapiens	XIST	lncRNA	7503	Homo sapiens	CLIP	NPInter	23846593	0.5483
RAID00606561	mmu-miR-21a-5p	miRNA	MIMAT0000530	Mus musculus	Gt(ROSA)26Sor	lncRNA	14910	Mus musculus	Reporter Assay//RT-PCR//Southern Blot//IHC (Immunohistochemistry)	miRTarBase	23238710	0.982
RAID00609864	hsa-miR-193a-3p	miRNA	MIMAT0000459	Homo sapiens	BCYRN1	lncRNA	618	Homo sapiens	CLIP	NPInter	23846593	0.5483
RAID00611636	mmu-miR-96-5p	miRNA	MIMAT0000541	Mus musculus	AI504432	lncRNA	229694	Mus musculus	CLIP-seq//Prediction	starBase//miRanda	None	0.6308
RAID00612065	hsa-miR-3690	miRNA	MIMAT0018119	Homo sapiens	MIR155HG	lncRNA	114614	Homo sapiens	CLIP	NPInter	23846593	0.5483
RAID00612954	hsa-miR-363-3p	miRNA	MIMAT0000707	Homo sapiens	DLEU1	lncRNA	10301	Homo sapiens	CLIP-seq	starBase	None	0.5483
RAID00613537	hsa-miR-221-3p	miRNA	MIMAT0000278	Homo sapiens	LINC00341	lncRNA	79686	Homo sapiens	CLIP-seq//Prediction	starBase//miRanda	None	0.6308
RAID00613892	hsa-miR-24-1-5p	miRNA	MIMAT0000079	Homo sapiens	LRRC75A-AS1	lncRNA	125144	Homo sapiens	CLIP-seq	starBase	None	0.5483
RAID00619710	hsa-miR-188-3p	miRNA	MIMAT0004613	Homo sapiens	MIR22HG	lncRNA	84981	Homo sapiens	CLIP	NPInter	23846593	0.5483
RAID00621067	hsa-miR-449a	miRNA	MIMAT0001541	Homo sapiens	LINC01547	lncRNA	84536	Homo sapiens	CLIP-seq//Prediction	starBase//miRanda	None	0.6308
RAID00624452	hsa-miR-4673	miRNA	MIMAT0019755	Homo sapiens	BCYRN1	lncRNA	618	Homo sapiens	CLIP	NPInter	23846593	0.5483
RAID00625759	hsa-miR-204-5p	miRNA	MIMAT0000265	Homo sapiens	TP73-AS1	lncRNA	57212	Homo sapiens	CLIP-seq	starBase	None	0.5483
RAID00627139	hsa-miR-17-5p	miRNA	MIMAT0000070	Homo sapiens	XIST	lncRNA	7503	Homo sapiens	CLIP	NPInter	23846593	0.5483
RAID00630216	hsa-let-7b-5p	miRNA	MIMAT0000063	Homo sapiens	KRASP1	lncRNA	3844	Homo sapiens	Reporter Assay//RT-PCR	RAID	20577206	0.8808
RAID00630797	hsa-miR-519e-3p	miRNA	MIMAT0002829	Homo sapiens	THSD1P1	lncRNA	374500	Homo sapiens	CLIP-seq	starBase	None	0.5483
RAID00631882	hsa-miR-106a-5p	miRNA	MIMAT0000103	Homo sapiens	SNAP47-AS1	lncRNA	100885800	Homo sapiens	CLIP	NPInter	25531890	0.5483
RAID00633513	hsa-let-7g-5p	miRNA	MIMAT0000414	Homo sapiens	SNHG4	lncRNA	724102	Homo sapiens	CLIP-seq//Prediction	starBase//miRanda	None	0.6308
RAID00635062	hsa-miR-509-3-5p	miRNA	MIMAT0004975	Homo sapiens	LINC00598	lncRNA	646982	Homo sapiens	PAR-CLIP	miRTarBase	22100165	0.5483
RAID00637684	hsa-miR-1255a	miRNA	MIMAT0005906	Homo sapiens	BCYRN1	lncRNA	618	Homo sapiens	CLIP	NPInter	23846593	0.5483
RAID00638655	hsa-miR-301b-3p	miRNA	MIMAT0004958	Homo sapiens	H19	lncRNA	283120	Homo sapiens	CLIP-seq//Prediction	starBase//miRanda	None	0.6308
RAID00638693	hsa-miR-762	miRNA	MIMAT0010313	Homo sapiens	XIST	lncRNA	7503	Homo sapiens	CLIP	NPInter	23846593	0.5483
RAID00643192	hsa-miR-145-3p	miRNA	MIMAT0004601	Homo sapiens	XIST	lncRNA	7503	Homo sapiens	CLIP	NPInter	23846593	0.5483
RAID00645494	hsa-miR-1207-5p	miRNA	MIMAT0005871	Homo sapiens	SNHG3	lncRNA	8420	Homo sapiens	CLIP	NPInter	23846593	0.5483
RAID00647796	hsa-miR-4273	miRNA	MIMAT0016903	Homo sapiens	MALAT1	lncRNA	378938	Homo sapiens	CLIP	NPInter	23846593	0.5483
RAID00649570	hsa-miR-6852-3p	miRNA	MIMAT0027605	Homo sapiens	LINC00598	lncRNA	646982	Homo sapiens	CLIP-seq	miRTarBase	23824327	0.5483
RAID00650890	hsa-let-7e-5p	miRNA	MIMAT0000066	Homo sapiens	MGC12916	lncRNA	84815	Homo sapiens	CLIP-seq//Prediction	starBase//miRanda	None	0.6308
RAID00650950	hsa-miR-548l	miRNA	MIMAT0005889	Homo sapiens	OIP5-AS1	lncRNA	729082	Homo sapiens	CLIP	NPInter	23846593	0.5483
RAID00652160	hsa-miR-146a-5p	miRNA	MIMAT0000449	Homo sapiens	ZNF37BP	lncRNA	100129482	Homo sapiens	CLIP-seq	starBase	None	0.5483
RAID00652199	hsa-miR-223-3p	miRNA	MIMAT0000280	Homo sapiens	EPB41L4A-AS1	lncRNA	114915	Homo sapiens	CLIP-seq//Prediction	starBase//miRanda	None	0.6308
RAID00653943	mmu-miR-141-3p	miRNA	MIMAT0000153	Mus musculus	Dnm3os	lncRNA	474332	Mus musculus	CLIP-seq	starBase	None	0.5483
RAID00654368	hsa-miR-424-5p	miRNA	MIMAT0001341	Homo sapiens	MCM3AP-AS1	lncRNA	114044	Homo sapiens	CLIP-seq//Prediction	starBase//miRanda	None	0.6308
RAID00654674	hsa-miR-3187-5p	miRNA	MIMAT0019216	Homo sapiens	LINC00346	lncRNA	283487	Homo sapiens	CLIP-seq	miRTarBase	23824327	0.5483
RAID00654691	hsa-miR-519d-3p	miRNA	MIMAT0002853	Homo sapiens	PTENP1	lncRNA	11191	Homo sapiens	CLIP-seq//Prediction	starBase//miRanda	None	0.6308
RAID00657882	hsa-miR-17-5p	miRNA	MIMAT0000070	Homo sapiens	E2F3P1	lncRNA	1872	Homo sapiens	Reporter Assay//RT-PCR	RAID	20577206	0.8808
RAID00659930	hsa-miR-29b-2-5p	miRNA	MIMAT0004515	Homo sapiens	OIP5-AS1	lncRNA	729082	Homo sapiens	CLIP	NPInter	23846593	0.5483
RAID00660257	hsa-miR-433-3p	miRNA	MIMAT0001627	Homo sapiens	CTBP1-AS2	lncRNA	92070	Homo sapiens	CLIP-seq//Prediction	starBase//miRanda	None	0.6308
RAID00664673	hsa-miR-216b-5p	miRNA	MIMAT0004959	Homo sapiens	LOC256880	lncRNA	256880	Homo sapiens	CLIP-seq//Prediction	starBase//miRanda	None	0.6308
RAID00666015	hsa-miR-22-3p	miRNA	MIMAT0000077	Homo sapiens	H19	lncRNA	283120	Homo sapiens	IP (immunoprecipitation)//Reporter Assay//RT-PCR	RAID	26853553	0.9526
RAID00669300	hsa-miR-106a-5p	miRNA	MIMAT0000103	Homo sapiens	LINC00342	lncRNA	150759	Homo sapiens	CLIP	NPInter	25531890	0.5483
RAID00670181	hsa-miR-3617-3p	miRNA	MIMAT0022966	Homo sapiens	XIST	lncRNA	7503	Homo sapiens	CLIP	NPInter	23846593	0.5483
RAID00670323	hsa-miR-5700	miRNA	MIMAT0022493	Homo sapiens	HNRNPU	lncRNA	3192	Homo sapiens	CLIP	NPInter	23846593	0.5483
RAID00674686	hsa-miR-1237-5p	miRNA	MIMAT0022946	Homo sapiens	XIST	lncRNA	7503	Homo sapiens	CLIP	NPInter	23846593	0.5483
RAID00675591	hsa-miR-141-5p	miRNA	MIMAT0004598	Homo sapiens	HNRNPU	lncRNA	3192	Homo sapiens	CLIP	NPInter	23846593	0.5483
RAID00680036	hsa-miR-6893-5p	miRNA	MIMAT0027686	Homo sapiens	DLEU1	lncRNA	10301	Homo sapiens	CLIP-seq	miRTarBase	19536157	0.5483
RAID00682374	hsa-miR-3622b-3p	miRNA	MIMAT0018006	Homo sapiens	LINC00598	lncRNA	646982	Homo sapiens	CLIP-seq	miRTarBase	23824327	0.5483
RAID00683238	hsa-miR-370-3p	miRNA	MIMAT0000722	Homo sapiens	FBXL19-AS1	lncRNA	283932	Homo sapiens	CLIP-seq//Prediction	starBase//miRanda	None	0.6308
RAID00684246	hsa-miR-26b-5p	miRNA	MIMAT0000083	Homo sapiens	WHAMMP3	lncRNA	339005	Homo sapiens	Microarray	miRTarBase	19088304	0.5483
RAID00685174	hsa-miR-495-3p	miRNA	MIMAT0002817	Homo sapiens	MIR17HG	lncRNA	407975	Homo sapiens	CLIP-seq//Prediction	starBase//miRanda	None	0.6308
RAID00686277	hsa-miR-361-3p	miRNA	MIMAT0004682	Homo sapiens	XIST	lncRNA	7503	Homo sapiens	CLIP	NPInter	23846593	0.5483
RAID00686797	hsa-miR-337-3p	miRNA	MIMAT0000754	Homo sapiens	OIP5-AS1	lncRNA	729082	Homo sapiens	CLIP	NPInter	23846593	0.5483
RAID00686918	hsa-miR-2682-5p	miRNA	MIMAT0013517	Homo sapiens	BCYRN1	lncRNA	618	Homo sapiens	CLIP	NPInter	23846593	0.5483
RAID00687346	hsa-miR-6739-5p	miRNA	MIMAT0027379	Homo sapiens	BDNF-AS	lncRNA	497258	Homo sapiens	PAR-CLIP	miRTarBase	23592263	0.5483
RAID00687632	hsa-miR-17-5p	miRNA	MIMAT0000070	Homo sapiens	PTENP1	lncRNA	11191	Homo sapiens	CLIP-seq//Prediction	ncRDeathDB2.0//starBase//miRanda	25617127	0.6308
RAID00687839	hsa-miR-501-3p	miRNA	MIMAT0004774	Homo sapiens	LINC00632	lncRNA	286411	Homo sapiens	CLIP-seq	miRTarBase	23313552	0.5483
RAID00691339	hsa-miR-412-3p	miRNA	MIMAT0002170	Homo sapiens	MALAT1	lncRNA	378938	Homo sapiens	CLIP	NPInter	23846593	0.5483
RAID00692090	hsa-miR-5584-5p	miRNA	MIMAT0022283	Homo sapiens	MIR22HG	lncRNA	84981	Homo sapiens	CLIP	NPInter	23846593	0.5483
RAID00693678	hsa-miR-20b-5p	miRNA	MIMAT0001413	Homo sapiens	WHAMMP2	lncRNA	440253	Homo sapiens	CLIP-seq//Prediction	starBase//miRanda	None	0.6308
RAID00694454	hsa-miR-16-5p	miRNA	MIMAT0000069	Homo sapiens	TEX41	lncRNA	401014	Homo sapiens	CLIP-seq//Prediction	starBase//miRanda	None	0.6308
RAID00694612	hsa-miR-4787-5p	miRNA	MIMAT0019956	Homo sapiens	HOXA10-AS	lncRNA	100874323	Homo sapiens	CLIP	NPInter	23846593	0.5483
RAID00695181	hsa-miR-4507	miRNA	MIMAT0019044	Homo sapiens	HOXA10-AS	lncRNA	100874323	Homo sapiens	CLIP	NPInter	23846593	0.5483
RAID00695521	hsa-miR-19a-3p	miRNA	MIMAT0000073	Homo sapiens	CROCCP2	lncRNA	84809	Homo sapiens	CLIP-seq	starBase	None	0.5483
RAID00696416	hsa-miR-4693-3p	miRNA	MIMAT0019785	Homo sapiens	XIST	lncRNA	7503	Homo sapiens	CLIP	NPInter	23846593	0.5483
RAID00696841	hsa-miR-301a-3p	miRNA	MIMAT0000688	Homo sapiens	XIST	lncRNA	7503	Homo sapiens	CLIP	NPInter	23846593	0.5483
RAID00696956	hsa-miR-4686	miRNA	MIMAT0019773	Homo sapiens	GAS5	lncRNA	60674	Homo sapiens	CLIP	NPInter	23846593	0.5483
RAID00697817	hsa-miR-4458	miRNA	MIMAT0018980	Homo sapiens	XIST	lncRNA	7503	Homo sapiens	CLIP	NPInter	23846593	0.5483
RAID00698040	hsa-miR-34c-5p	miRNA	MIMAT0000686	Homo sapiens	CDK4PS	lncRNA	359941	Homo sapiens	Reporter Assay//RT-PCR	RAID	20577206	0.8808
RAID00699348	hsa-miR-320a	miRNA	MIMAT0000510	Homo sapiens	LOC389641	lncRNA	389641	Homo sapiens	CLIP-seq//Prediction	starBase//miRanda	None	0.6308
RAID00700763	hsa-miR-4671-3p	miRNA	MIMAT0019753	Homo sapiens	XIST	lncRNA	7503	Homo sapiens	CLIP	NPInter	23846593	0.5483
RAID00701293	hsa-miR-578	miRNA	MIMAT0003243	Homo sapiens	LOH12CR2	lncRNA	503693	Homo sapiens	PAR-CLIP	miRTarBase	22291592//22100165	0.5483
RAID00702093	hsa-miR-6808-5p	miRNA	MIMAT0027516	Homo sapiens	LINC00598	lncRNA	646982	Homo sapiens	CLIP-seq	miRTarBase	23824327	0.5483
RAID00702337	hsa-miR-187-3p	miRNA	MIMAT0000262	Homo sapiens	LINC00869	lncRNA	57234	Homo sapiens	CLIP-seq//Prediction	starBase//miRanda	None	0.6308
RAID00702935	hsa-miR-526b-3p	miRNA	MIMAT0002836	Homo sapiens	TP73-AS1	lncRNA	57212	Homo sapiens	CLIP-seq	starBase	None	0.5483
RAID00703726	hsa-miR-6075	miRNA	MIMAT0023700	Homo sapiens	WT1-AS	lncRNA	51352	Homo sapiens	CLIP	NPInter	23846593	0.5483
RAID00704001	hsa-miR-589-3p	miRNA	MIMAT0003256	Homo sapiens	BDNF-AS	lncRNA	497258	Homo sapiens	PAR-CLIP	miRTarBase	23592263	0.5483
RAID00705091	hsa-miR-6844	miRNA	MIMAT0027589	Homo sapiens	LINC00598	lncRNA	646982	Homo sapiens	CLIP-seq	miRTarBase	23824327	0.5483
RAID00705325	hsa-let-7i-5p	miRNA	MIMAT0000415	Homo sapiens	MCM3AP-AS1	lncRNA	114044	Homo sapiens	CLIP-seq	starBase	None	0.5483
RAID00706843	hsa-miR-106a-5p	miRNA	MIMAT0000103	Homo sapiens	MAPKAPK5-AS1	lncRNA	51275	Homo sapiens	CLIP	NPInter	25531890	0.5483
RAID00708025	hsa-miR-19b-3p	miRNA	MIMAT0000074	Homo sapiens	SNHG20	lncRNA	654434	Homo sapiens	CLIP-seq//Prediction	starBase//miRanda	None	0.6308
RAID00708920	hsa-miR-1289	miRNA	MIMAT0005879	Homo sapiens	XIST	lncRNA	7503	Homo sapiens	CLIP	NPInter	23846593	0.5483
RAID00711405	hsa-miR-382-5p	miRNA	MIMAT0000737	Homo sapiens	LRRC75A-AS1	lncRNA	125144	Homo sapiens	CLIP-seq//Prediction	starBase//miRanda	None	0.6308
RAID00713379	hsa-miR-27a-3p	miRNA	MIMAT0000084	Homo sapiens	CTBP1-AS2	lncRNA	92070	Homo sapiens	CLIP-seq//Prediction	starBase//miRanda	None	0.6308
RAID00715889	hsa-miR-3677-5p	miRNA	MIMAT0019221	Homo sapiens	XIST	lncRNA	7503	Homo sapiens	CLIP	NPInter	23846593	0.5483
RAID00719080	hsa-miR-519b-3p	miRNA	MIMAT0002837	Homo sapiens	HNRNPU	lncRNA	3192	Homo sapiens	CLIP	NPInter	23846593	0.5483
RAID00721723	hsa-miR-130a-3p	miRNA	MIMAT0000425	Homo sapiens	ZNRD1-AS1	lncRNA	80862	Homo sapiens	CLIP-seq//Prediction	starBase//miRanda	None	0.6308
RAID00722229	hsa-miR-335-3p	miRNA	MIMAT0004703	Homo sapiens	GAS5	lncRNA	60674	Homo sapiens	CLIP	NPInter	23846593	0.5483
RAID00722460	hsa-miR-187-3p	miRNA	MIMAT0000262	Homo sapiens	LINC00341	lncRNA	79686	Homo sapiens	CLIP-seq//Prediction	starBase//miRanda	None	0.6308
RAID00723020	hsa-miR-548ar-5p	miRNA	MIMAT0022265	Homo sapiens	XIST	lncRNA	7503	Homo sapiens	CLIP	NPInter	23846593	0.5483
RAID00724875	hsa-miR-34b-5p	miRNA	MIMAT0000685	Homo sapiens	BCYRN1	lncRNA	618	Homo sapiens	CLIP	NPInter	23846593	0.5483
RAID00725208	hsa-miR-615-5p	miRNA	MIMAT0004804	Homo sapiens	BCYRN1	lncRNA	618	Homo sapiens	CLIP	NPInter	23846593	0.5483
RAID00728575	hsa-miR-590-3p	miRNA	MIMAT0004801	Homo sapiens	HNRNPU	lncRNA	3192	Homo sapiens	CLIP	NPInter	23846593	0.5483
RAID00729135	hsa-miR-6768-3p	miRNA	MIMAT0027437	Homo sapiens	LINC00598	lncRNA	646982	Homo sapiens	PAR-CLIP	miRTarBase	22012620	0.5483
RAID00730471	hsa-miR-372-5p	miRNA	MIMAT0026484	Homo sapiens	DLEU1	lncRNA	10301	Homo sapiens	CLIP-seq	miRTarBase	23824327	0.5483
RAID00731619	hsa-miR-106a-5p	miRNA	MIMAT0000103	Homo sapiens	LINC00265	lncRNA	349114	Homo sapiens	CLIP	NPInter	25531890	0.5483
RAID00732698	hsa-miR-1297	miRNA	MIMAT0005886	Homo sapiens	CTBP1-AS2	lncRNA	92070	Homo sapiens	CLIP-seq//Prediction	starBase//miRanda	None	0.6308
RAID00733345	hsa-miR-302c-3p	miRNA	MIMAT0000717	Homo sapiens	LINC00598	lncRNA	646982	Homo sapiens	CLIP-seq	miRTarBase	23313552	0.5483
RAID00738402	hsa-miR-5193	miRNA	MIMAT0021124	Homo sapiens	MIR22HG	lncRNA	84981	Homo sapiens	CLIP	NPInter	23846593	0.5483
RAID00738411	hsa-miR-4298	miRNA	MIMAT0016852	Homo sapiens	BCYRN1	lncRNA	618	Homo sapiens	CLIP	NPInter	23846593	0.5483
RAID00740718	hsa-miR-4446-5p	miRNA	MIMAT0019233	Homo sapiens	LINC00598	lncRNA	646982	Homo sapiens	CLIP-seq	miRTarBase	23824327	0.5483
RAID00743090	hsa-miR-3692-5p	miRNA	MIMAT0018121	Homo sapiens	BCYRN1	lncRNA	618	Homo sapiens	CLIP	NPInter	23846593	0.5483
RAID00744621	hsa-miR-586	miRNA	MIMAT0003252	Homo sapiens	XIST	lncRNA	7503	Homo sapiens	CLIP	NPInter	23846593	0.5483
RAID00761171	hsa-miR-340-5p	miRNA	MIMAT0004692	Homo sapiens	XIST	lncRNA	7503	Homo sapiens	CLIP	NPInter	23846593	0.5483
RAID00761284	hsa-miR-6515-5p	miRNA	MIMAT0025486	Homo sapiens	XIST	lncRNA	7503	Homo sapiens	CLIP	NPInter	23846593	0.5483
RAID00764389	hsa-miR-132-3p	miRNA	MIMAT0000426	Homo sapiens	FOXO3B	lncRNA	2310	Homo sapiens	CLIP-seq	starBase	None	0.5483
RAID00764967	hsa-miR-374b-5p	miRNA	MIMAT0004955	Homo sapiens	ZFAS1	lncRNA	441951	Homo sapiens	CLIP-seq//Prediction	starBase//miRanda	None	0.6308
RAID00769321	hsa-miR-1224-3p	miRNA	MIMAT0005459	Homo sapiens	XIST	lncRNA	7503	Homo sapiens	CLIP	NPInter	23846593	0.5483
RAID00769408	hsa-miR-34a-5p	miRNA	MIMAT0000255	Homo sapiens	MCM3AP-AS1	lncRNA	114044	Homo sapiens	CLIP-seq	starBase	None	0.5483
RAID00769908	hsa-miR-431-5p	miRNA	MIMAT0001625	Homo sapiens	IDI2-AS1	lncRNA	55853	Homo sapiens	CLIP-seq	starBase	None	0.5483
RAID00770853	hsa-miR-495-3p	miRNA	MIMAT0002817	Homo sapiens	MIR155HG	lncRNA	114614	Homo sapiens	CLIP-seq//CLIP//Prediction	NPInter//starBase//miRanda	23846593	0.7226
RAID00772730	hsa-miR-106a-5p	miRNA	MIMAT0000103	Homo sapiens	DIO3OS	lncRNA	64150	Homo sapiens	CLIP	NPInter	25531890	0.5483
RAID00773799	hsa-miR-182-5p	miRNA	MIMAT0000259	Homo sapiens	FOXO3B	lncRNA	2310	Homo sapiens	CLIP-seq	starBase	None	0.5483
RAID00773838	hsa-miR-708-5p	miRNA	MIMAT0004926	Homo sapiens	OIP5-AS1	lncRNA	729082	Homo sapiens	CLIP//Prediction	NPInter//miRanda	23846593	0.6308
RAID00774663	hsa-miR-4763-5p	miRNA	MIMAT0019912	Homo sapiens	OIP5-AS1	lncRNA	729082	Homo sapiens	CLIP	NPInter	23846593	0.5483
RAID00775773	hsa-miR-4668-3p	miRNA	MIMAT0019746	Homo sapiens	HNRNPU	lncRNA	3192	Homo sapiens	CLIP	NPInter	23846593	0.5483
RAID00776044	hsa-miR-106a-5p	miRNA	MIMAT0000103	Homo sapiens	RFPL1S	lncRNA	10740	Homo sapiens	CLIP	NPInter	25531890	0.5483
RAID00776149	hsa-miR-548w	miRNA	MIMAT0015060	Homo sapiens	MALAT1	lncRNA	378938	Homo sapiens	CLIP	NPInter	23846593	0.5483
RAID00776943	hsa-miR-106a-5p	miRNA	MIMAT0000103	Homo sapiens	SPAG5-AS1	lncRNA	100506436	Homo sapiens	CLIP	NPInter	25531890	0.5483
RAID00777175	hsa-miR-106a-5p	miRNA	MIMAT0000103	Homo sapiens	OTUD6B-AS1	lncRNA	100506365	Homo sapiens	CLIP	NPInter	25531890	0.5483
RAID00777786	hsa-miR-1273g-3p	miRNA	MIMAT0022742	Homo sapiens	BCYRN1	lncRNA	618	Homo sapiens	CLIP	NPInter	23846593	0.5483
RAID00781418	hsa-miR-4310	miRNA	MIMAT0016862	Homo sapiens	OIP5-AS1	lncRNA	729082	Homo sapiens	CLIP	NPInter	23846593	0.5483
RAID00782670	hsa-miR-3606-3p	miRNA	MIMAT0022965	Homo sapiens	GAS5	lncRNA	60674	Homo sapiens	CLIP	NPInter	23846593	0.5483
RAID00782685	hsa-miR-371a-5p	miRNA	MIMAT0004687	Homo sapiens	LOC389641	lncRNA	389641	Homo sapiens	CLIP-seq//Prediction	starBase//miRanda	None	0.6308
RAID00785045	hsa-miR-5700	miRNA	MIMAT0022493	Homo sapiens	MALAT1	lncRNA	378938	Homo sapiens	CLIP	NPInter	23846593	0.5483
RAID00785707	hsa-miR-520a-3p	miRNA	MIMAT0002834	Homo sapiens	MIR17HG	lncRNA	407975	Homo sapiens	CLIP-seq//Prediction	starBase//miRanda	None	0.6308
RAID00787995	hsa-miR-600	miRNA	MIMAT0003268	Homo sapiens	LINC00324	lncRNA	284029	Homo sapiens	CLIP	NPInter	23846593	0.5483
RAID00788181	hsa-miR-378a-3p	miRNA	MIMAT0000732	Homo sapiens	RPL23AP82	lncRNA	284942	Homo sapiens	CLIP-seq//Prediction	starBase//miRanda	None	0.6308
RAID00788393	hsa-miR-8057	miRNA	MIMAT0030984	Homo sapiens	LINC00632	lncRNA	286411	Homo sapiens	CLIP-seq	miRTarBase	23824327	0.5483
RAID00788658	hsa-miR-4689	miRNA	MIMAT0019778	Homo sapiens	OIP5-AS1	lncRNA	729082	Homo sapiens	CLIP	NPInter	23846593	0.5483
RAID00789982	hsa-miR-129-5p	miRNA	MIMAT0000242	Homo sapiens	ZNF37BP	lncRNA	100129482	Homo sapiens	CLIP-seq	starBase	None	0.5483
RAID00790621	hsa-miR-3916	miRNA	MIMAT0018190	Homo sapiens	WT1-AS	lncRNA	51352	Homo sapiens	CLIP	NPInter	23846593	0.5483
RAID00796525	hsa-miR-548ah-5p	miRNA	MIMAT0018972	Homo sapiens	BCYRN1	lncRNA	618	Homo sapiens	CLIP	NPInter	23846593	0.5483
RAID00798621	hsa-miR-206	miRNA	MIMAT0000462	Homo sapiens	SNHG4	lncRNA	724102	Homo sapiens	CLIP-seq//Prediction	starBase//miRanda	None	0.6308
RAID00799785	hsa-miR-5096	miRNA	MIMAT0020603	Homo sapiens	BCYRN1	lncRNA	618	Homo sapiens	CLIP	NPInter	23846593	0.5483
RAID00801451	hsa-miR-106a-5p	miRNA	MIMAT0000103	Homo sapiens	TP73-AS1	lncRNA	57212	Homo sapiens	CLIP	NPInter	25531890	0.5483
RAID00801596	hsa-miR-4254	miRNA	MIMAT0016884	Homo sapiens	XIST	lncRNA	7503	Homo sapiens	CLIP	NPInter	23846593	0.5483
RAID00803148	hsa-miR-4667-3p	miRNA	MIMAT0019744	Homo sapiens	XIST	lncRNA	7503	Homo sapiens	CLIP	NPInter	23846593	0.5483
RAID00804509	hsa-miR-145-5p	miRNA	MIMAT0000437	Homo sapiens	UCA1	lncRNA	652995	Homo sapiens	Western Blot//Reporter Assay//RT-PCR	RAID	26544536	0.9526
RAID00807407	hsa-miR-501-3p	miRNA	MIMAT0004774	Homo sapiens	LINC00955	lncRNA	285492	Homo sapiens	PAR-CLIP	miRTarBase	21572407	0.5483
RAID00810257	hsa-miR-335-5p	miRNA	MIMAT0000765	Homo sapiens	ZNRD1-AS1	lncRNA	80862	Homo sapiens	Microarray	miRTarBase	18185580	0.5483
RAID00812461	hsa-miR-499b-5p	miRNA	MIMAT0019897	Homo sapiens	SNHG3	lncRNA	8420	Homo sapiens	CLIP	NPInter	23846593	0.5483
RAID00812714	hsa-miR-203a-3p	miRNA	MIMAT0000264	Homo sapiens	XIST	lncRNA	7503	Homo sapiens	CLIP	NPInter	23846593	0.5483
RAID00815448	hsa-miR-221-3p	miRNA	MIMAT0000278	Homo sapiens	TUG1	lncRNA	55000	Homo sapiens	CLIP-seq//Prediction	starBase//miRanda	None	0.6308
RAID00815499	hsa-miR-421	miRNA	MIMAT0003339	Homo sapiens	LOC388692	lncRNA	388692	Homo sapiens	CLIP-seq//Prediction	starBase//miRanda	None	0.6308
RAID00817185	hsa-miR-6134	miRNA	MIMAT0024618	Homo sapiens	BCYRN1	lncRNA	618	Homo sapiens	CLIP	NPInter	23846593	0.5483
RAID00817691	hsa-miR-512-3p	miRNA	MIMAT0002823	Homo sapiens	LINC00472	lncRNA	79940	Homo sapiens	CLIP-seq	starBase	None	0.5483
RAID00818471	hsa-miR-204-5p	miRNA	MIMAT0000265	Homo sapiens	LINC00696	lncRNA	100128378	Homo sapiens	CLIP-seq//Prediction	starBase//miRanda	None	0.6308
RAID00819305	hsa-miR-22-3p	miRNA	MIMAT0000077	Homo sapiens	BCYRN1	lncRNA	618	Homo sapiens	CLIP	NPInter	23846593	0.5483
RAID00825096	hsa-miR-647	miRNA	MIMAT0003317	Homo sapiens	MALAT1	lncRNA	378938	Homo sapiens	CLIP	NPInter	23846593	0.5483
RAID00825572	hsa-miR-497-5p	miRNA	MIMAT0002820	Homo sapiens	CTBP1-AS2	lncRNA	92070	Homo sapiens	CLIP-seq//Prediction	starBase//miRanda	None	0.6308
RAID00825816	hsa-miR-6124	miRNA	MIMAT0024597	Homo sapiens	OIP5-AS1	lncRNA	729082	Homo sapiens	CLIP	NPInter	23846593	0.5483
RAID00826318	hsa-miR-4802-3p	miRNA	MIMAT0019982	Homo sapiens	LINC00598	lncRNA	646982	Homo sapiens	PAR-CLIP	miRTarBase	22012620	0.5483
RAID00827015	hsa-miR-365a-3p	miRNA	MIMAT0000710	Homo sapiens	LINC00869	lncRNA	57234	Homo sapiens	CLIP-seq//Prediction	starBase//miRanda	None	0.6308
RAID00827030	hsa-miR-512-3p	miRNA	MIMAT0002823	Homo sapiens	DLEU1	lncRNA	10301	Homo sapiens	CLIP-seq	starBase	None	0.5483
RAID00828124	hsa-miR-3926	miRNA	MIMAT0018201	Homo sapiens	MALAT1	lncRNA	378938	Homo sapiens	CLIP	NPInter	23846593	0.5483
RAID00829398	hsa-miR-106a-5p	miRNA	MIMAT0000103	Homo sapiens	PCAT1	lncRNA	100750225	Homo sapiens	CLIP	NPInter	25531890	0.5483
RAID00830111	hsa-miR-4728-5p	miRNA	MIMAT0019849	Homo sapiens	BDNF-AS	lncRNA	497258	Homo sapiens	PAR-CLIP	miRTarBase	23592263	0.5483
RAID00831268	hsa-miR-30a-3p	miRNA	MIMAT0000088	Homo sapiens	SNHG1	lncRNA	23642	Homo sapiens	CLIP	NPInter	23846593	0.5483
RAID00834755	hsa-miR-365a-3p	miRNA	MIMAT0000710	Homo sapiens	LINC00852	lncRNA	84657	Homo sapiens	CLIP-seq//Prediction	starBase//miRanda	None	0.6308
RAID00838923	hsa-let-7a-5p	miRNA	MIMAT0000062	Homo sapiens	CDKN2B-AS1	lncRNA	100048912	Homo sapiens	CLIP-seq//Prediction	starBase//miRanda	None	0.6308
RAID00838930	hsa-miR-6771-3p	miRNA	MIMAT0027443	Homo sapiens	LINC00598	lncRNA	646982	Homo sapiens	CLIP-seq	miRTarBase	23824327	0.5483
RAID00840131	hsa-miR-4700-3p	miRNA	MIMAT0019797	Homo sapiens	XIST	lncRNA	7503	Homo sapiens	CLIP	NPInter	23846593	0.5483
RAID00842346	hsa-miR-218-5p	miRNA	MIMAT0000275	Homo sapiens	SNHG15	lncRNA	285958	Homo sapiens	CLIP-seq	miRTarBase	23212916	0.5483
RAID00842722	hsa-miR-449a	miRNA	MIMAT0001541	Homo sapiens	THSD1P1	lncRNA	374500	Homo sapiens	CLIP-seq	starBase	None	0.5483
RAID00844076	hsa-miR-6504-3p	miRNA	MIMAT0025465	Homo sapiens	MIR22HG	lncRNA	84981	Homo sapiens	CLIP	NPInter	23846593	0.5483
RAID00844255	hsa-miR-4255	miRNA	MIMAT0016885	Homo sapiens	LINC00598	lncRNA	646982	Homo sapiens	PAR-CLIP	miRTarBase	20371350	0.5483
RAID00845254	hsa-miR-590-3p	miRNA	MIMAT0004801	Homo sapiens	XIST	lncRNA	7503	Homo sapiens	CLIP	NPInter	23846593	0.5483
RAID00845341	hsa-miR-4728-5p	miRNA	MIMAT0019849	Homo sapiens	XIST	lncRNA	7503	Homo sapiens	CLIP	NPInter	23846593	0.5483
RAID00848751	hsa-miR-200b-3p	miRNA	MIMAT0000318	Homo sapiens	H19	lncRNA	283120	Homo sapiens	Western Blot//RT-PCR	LncRNA2Target	23222811	0.8808
RAID00852060	hsa-miR-520g-3p	miRNA	MIMAT0002858	Homo sapiens	THSD1P1	lncRNA	374500	Homo sapiens	CLIP-seq	starBase	None	0.5483
RAID00852448	hsa-miR-548o-5p	miRNA	MIMAT0022738	Homo sapiens	MALAT1	lncRNA	378938	Homo sapiens	CLIP	NPInter	23846593	0.5483
RAID00852945	hsa-miR-218-5p	miRNA	MIMAT0000275	Homo sapiens	LINC00173	lncRNA	100287569	Homo sapiens	CLIP-seq//Prediction	starBase//miRanda	None	0.6308
RAID00857220	hsa-miR-3153	miRNA	MIMAT0015026	Homo sapiens	MIR22HG	lncRNA	84981	Homo sapiens	CLIP	NPInter	23846593	0.5483
RAID00857730	hsa-miR-422a	miRNA	MIMAT0001339	Homo sapiens	DANCR	lncRNA	57291	Homo sapiens	CLIP-seq//Prediction	starBase//miRanda	None	0.6308
RAID00857849	hsa-miR-526b-5p	miRNA	MIMAT0002835	Homo sapiens	MCM3AP-AS1	lncRNA	114044	Homo sapiens	CLIP-seq	starBase	None	0.5483
RAID00858258	hsa-miR-4312	miRNA	MIMAT0016864	Homo sapiens	LINC00598	lncRNA	646982	Homo sapiens	CLIP-seq	miRTarBase	23313552	0.5483
RAID00859400	hsa-miR-106a-5p	miRNA	MIMAT0000103	Homo sapiens	ITCH-IT1	lncRNA	100874302	Homo sapiens	CLIP	NPInter	25531890	0.5483
RAID00864021	hsa-miR-106a-5p	miRNA	MIMAT0000103	Homo sapiens	ZFAS1	lncRNA	441951	Homo sapiens	CLIP	NPInter	25531890	0.5483
RAID00867052	hsa-miR-125a-5p	miRNA	MIMAT0000443	Homo sapiens	XIST	lncRNA	7503	Homo sapiens	CLIP	NPInter	23846593	0.5483
RAID00868982	hsa-miR-155-5p	miRNA	MIMAT0000646	Homo sapiens	MIR17HG	lncRNA	407975	Homo sapiens	CLIP-seq//Prediction	starBase//miRanda	None	0.6308
RAID00869661	hsa-miR-501-5p	miRNA	MIMAT0002872	Homo sapiens	LINC00472	lncRNA	79940	Homo sapiens	CLIP-seq	starBase	None	0.5483
RAID00871038	hsa-miR-6127	miRNA	MIMAT0024610	Homo sapiens	BCYRN1	lncRNA	618	Homo sapiens	CLIP	NPInter	23846593	0.5483
RAID00871257	hsa-miR-548f-5p	miRNA	MIMAT0026739	Homo sapiens	LINC00598	lncRNA	646982	Homo sapiens	PAR-CLIP	miRTarBase	22012620	0.5483
RAID00871850	hsa-miR-485-5p	miRNA	MIMAT0002175	Homo sapiens	OIP5-AS1	lncRNA	729082	Homo sapiens	CLIP	NPInter	23846593	0.5483
RAID00873823	hsa-miR-106a-5p	miRNA	MIMAT0000103	Homo sapiens	UBXN8	lncRNA	7993	Homo sapiens	CLIP	NPInter	25531890	0.5483
RAID00875286	hsa-miR-383-5p	miRNA	MIMAT0000738	Homo sapiens	WT1-AS	lncRNA	51352	Homo sapiens	CLIP//Prediction	NPInter//miRanda	23846593	0.6308
RAID00876069	hsa-miR-3614-5p	miRNA	MIMAT0017992	Homo sapiens	BDNF-AS	lncRNA	497258	Homo sapiens	PAR-CLIP	miRTarBase	23592263	0.5483
RAID00877516	hsa-miR-3126-3p	miRNA	MIMAT0015377	Homo sapiens	LINC00598	lncRNA	646982	Homo sapiens	CLIP-seq	miRTarBase	19536157	0.5483
RAID00877736	hsa-miR-3914	miRNA	MIMAT0018188	Homo sapiens	XIST	lncRNA	7503	Homo sapiens	CLIP	NPInter	23846593	0.5483
RAID00880860	hsa-miR-34b-5p	miRNA	MIMAT0000685	Homo sapiens	HNRNPU	lncRNA	3192	Homo sapiens	CLIP	NPInter	23846593	0.5483
RAID00883912	hsa-miR-24-3p	miRNA	MIMAT0000080	Homo sapiens	LOC388692	lncRNA	388692	Homo sapiens	CLIP-seq//Prediction	starBase//miRanda	None	0.6308
RAID00885016	hsa-miR-130a-3p	miRNA	MIMAT0000425	Homo sapiens	FAM201A	lncRNA	158228	Homo sapiens	CLIP-seq//Prediction	starBase//miRanda	None	0.6308
RAID00889203	hsa-miR-211-5p	miRNA	MIMAT0000268	Homo sapiens	MCM3AP-AS1	lncRNA	114044	Homo sapiens	CLIP-seq//Prediction	starBase//miRanda	None	0.6308
RAID00889700	hsa-miR-548ac	miRNA	MIMAT0018938	Homo sapiens	MALAT1	lncRNA	378938	Homo sapiens	CLIP	NPInter	23846593	0.5483
RAID00891033	hsa-miR-3198	miRNA	MIMAT0015083	Homo sapiens	BCYRN1	lncRNA	618	Homo sapiens	CLIP	NPInter	23846593	0.5483
RAID00895442	hsa-miR-548aq-5p	miRNA	MIMAT0022263	Homo sapiens	MALAT1	lncRNA	378938	Homo sapiens	CLIP	NPInter	23846593	0.5483
RAID00898394	hsa-miR-517-5p	miRNA	MIMAT0002851	Homo sapiens	MAPKAPK5-AS1	lncRNA	51275	Homo sapiens	CLIP-seq	starBase	None	0.5483
RAID00905715	hsa-miR-4436b-3p	miRNA	MIMAT0019941	Homo sapiens	XIST	lncRNA	7503	Homo sapiens	CLIP	NPInter	23846593	0.5483
RAID00909740	hsa-miR-4691-5p	miRNA	MIMAT0019781	Homo sapiens	LINC00598	lncRNA	646982	Homo sapiens	CLIP-seq	miRTarBase	23824327	0.5483
RAID00910381	hsa-miR-5011-5p	miRNA	MIMAT0021045	Homo sapiens	LINC00955	lncRNA	285492	Homo sapiens	PAR-CLIP	miRTarBase	21572407	0.5483
RAID00912520	hsa-miR-4643	miRNA	MIMAT0019703	Homo sapiens	XIST	lncRNA	7503	Homo sapiens	CLIP	NPInter	23846593	0.5483
RAID00912797	hsa-miR-6133	miRNA	MIMAT0024617	Homo sapiens	LINC00598	lncRNA	646982	Homo sapiens	PAR-CLIP	miRTarBase	23592263	0.5483
RAID00913005	hsa-miR-3682-3p	miRNA	MIMAT0018110	Homo sapiens	BANCR	lncRNA	100885775	Homo sapiens	Microarray//RNA-seq	LncRNA2Target	None	0.6606
RAID00916595	hsa-miR-17-5p	miRNA	MIMAT0000070	Homo sapiens	LINC00598	lncRNA	646982	Homo sapiens	CLIP-seq	miRTarBase	23313552	0.5483
RAID00917276	hsa-miR-1273e	miRNA	MIMAT0018079	Homo sapiens	HNRNPU	lncRNA	3192	Homo sapiens	CLIP	NPInter	23846593	0.5483
RAID00918720	hsa-miR-605-5p	miRNA	MIMAT0003273	Homo sapiens	MALAT1	lncRNA	378938	Homo sapiens	CLIP	NPInter	23846593	0.5483
RAID00920824	hsa-miR-298	miRNA	MIMAT0004901	Homo sapiens	MIR22HG	lncRNA	84981	Homo sapiens	CLIP	NPInter	23846593	0.5483
RAID00921049	hsa-miR-4637	miRNA	MIMAT0019694	Homo sapiens	MIR22HG	lncRNA	84981	Homo sapiens	CLIP	NPInter	23846593	0.5483
RAID00922195	hsa-miR-4459	miRNA	MIMAT0018981	Homo sapiens	HNRNPU	lncRNA	3192	Homo sapiens	CLIP	NPInter	23846593	0.5483
RAID00925709	hsa-miR-1271-3p	miRNA	MIMAT0022712	Homo sapiens	BCYRN1	lncRNA	618	Homo sapiens	CLIP	NPInter	23846593	0.5483
RAID00926333	hsa-miR-548a-3p	miRNA	MIMAT0003251	Homo sapiens	MALAT1	lncRNA	378938	Homo sapiens	CLIP	NPInter	23846593	0.5483
RAID00927852	hsa-miR-152-3p	miRNA	MIMAT0000438	Homo sapiens	XIST	lncRNA	7503	Homo sapiens	CLIP	ncRDeathDB2.0//NPInter	23846593//25578780	0.5483
RAID00927969	mmu-miR-490-3p	miRNA	MIMAT0003780	Mus musculus	Gm11944	lncRNA	100302648	Mus musculus	CLIP-seq	starBase	None	0.5483
RAID00931624	hsa-miR-4680-5p	miRNA	MIMAT0019764	Homo sapiens	MIR137HG	lncRNA	400765	Homo sapiens	CLIP	NPInter	23846593	0.5483
RAID00932472	hsa-miR-330-3p	miRNA	MIMAT0000751	Homo sapiens	MALAT1	lncRNA	378938	Homo sapiens	CLIP	NPInter	23846593	0.5483
RAID00934994	hsa-miR-154-5p	miRNA	MIMAT0000452	Homo sapiens	PTENP1	lncRNA	11191	Homo sapiens	CLIP-seq//Prediction	starBase//miRanda	None	0.6308
RAID00937037	hsa-miR-548g-5p	miRNA	MIMAT0022722	Homo sapiens	LINC00598	lncRNA	646982	Homo sapiens	PAR-CLIP	miRTarBase	22012620	0.5483
RAID00942760	hsa-miR-3190-5p	miRNA	MIMAT0015073	Homo sapiens	LINC00598	lncRNA	646982	Homo sapiens	CLIP-seq	miRTarBase	19536157	0.5483
RAID00943046	hsa-miR-3675-3p	miRNA	MIMAT0018099	Homo sapiens	LINC00346	lncRNA	283487	Homo sapiens	CLIP-seq	miRTarBase	23313552	0.5483
RAID00944028	hsa-miR-27b-3p	miRNA	MIMAT0000419	Homo sapiens	CTBP1-AS2	lncRNA	92070	Homo sapiens	CLIP-seq//Prediction	starBase//miRanda	None	0.6308
RAID00944901	hsa-miR-199a-5p	miRNA	MIMAT0000231	Homo sapiens	TP73-AS1	lncRNA	57212	Homo sapiens	CLIP-seq	starBase	None	0.5483
RAID00945277	hsa-miR-5680	miRNA	MIMAT0022468	Homo sapiens	OIP5-AS1	lncRNA	729082	Homo sapiens	CLIP	NPInter	23846593	0.5483
RAID00945794	hsa-miR-4668-3p	miRNA	MIMAT0019746	Homo sapiens	OIP5-AS1	lncRNA	729082	Homo sapiens	CLIP	NPInter	23846593	0.5483
RAID00946572	mmu-miR-144-3p	miRNA	MIMAT0000156	Mus musculus	Rnf149	lncRNA	67702	Mus musculus	CLIP-seq	starBase	None	0.5483
RAID00947135	hsa-miR-519b-3p	miRNA	MIMAT0002837	Homo sapiens	FAM13A-AS1	lncRNA	285512	Homo sapiens	CLIP-seq	starBase	None	0.5483
RAID00948714	hsa-miR-106a-5p	miRNA	MIMAT0000103	Homo sapiens	CARMN	lncRNA	728264	Homo sapiens	CLIP	NPInter	25531890	0.5483
RAID00949584	hsa-miR-4477b	miRNA	MIMAT0019005	Homo sapiens	LINC00461	lncRNA	645323	Homo sapiens	CLIP	NPInter	23846593	0.5483
RAID00950096	hsa-miR-125a-3p	miRNA	MIMAT0004602	Homo sapiens	TP73-AS1	lncRNA	57212	Homo sapiens	CLIP-seq//Prediction	starBase//miRanda	None	0.6308
RAID00950469	hsa-miR-106a-5p	miRNA	MIMAT0000103	Homo sapiens	MEIS1-AS2	lncRNA	100873998	Homo sapiens	CLIP	NPInter	25531890	0.5483
RAID00951126	hsa-miR-135b-5p	miRNA	MIMAT0000758	Homo sapiens	LINCMD1	lncRNA	101154644	Homo sapiens	RT-PCR//RNA interference//Reporter Assay//ChIP (chromatin immunoprecipitation assay)	RAID//NPInter//MNDR	22000014//24440503	0.9786
RAID00951226	hsa-miR-130b-3p	miRNA	MIMAT0000691	Homo sapiens	MIR17HG	lncRNA	407975	Homo sapiens	CLIP-seq//Prediction	starBase//miRanda	None	0.6308
RAID00957751	hsa-miR-330-5p	miRNA	MIMAT0004693	Homo sapiens	LRRC75A-AS1	lncRNA	125144	Homo sapiens	CLIP-seq//Prediction	starBase//miRanda	None	0.6308
RAID00958287	hsa-miR-106a-5p	miRNA	MIMAT0000103	Homo sapiens	KIRREL-IT1	lncRNA	100505785	Homo sapiens	CLIP	NPInter	25531890	0.5483
RAID00959662	hsa-miR-20a-5p	miRNA	MIMAT0000075	Homo sapiens	MALAT1	lncRNA	378938	Homo sapiens	CLIP	NPInter	23846593	0.5483
RAID00960406	mmu-miR-196b-5p	miRNA	MIMAT0001081	Mus musculus	AI504432	lncRNA	229694	Mus musculus	CLIP-seq//Prediction	starBase//miRanda	None	0.6308
RAID00961268	hsa-miR-301b-3p	miRNA	MIMAT0004958	Homo sapiens	MIR17HG	lncRNA	407975	Homo sapiens	CLIP-seq//Prediction	starBase//miRanda	None	0.6308
RAID00961902	hsa-let-7a-5p	miRNA	MIMAT0000062	Homo sapiens	LINC00472	lncRNA	79940	Homo sapiens	CLIP-seq	starBase	None	0.5483
RAID00963328	hsa-miR-4757-5p	miRNA	MIMAT0019901	Homo sapiens	LINC00598	lncRNA	646982	Homo sapiens	CLIP-seq	miRTarBase	23313552	0.5483
RAID00965326	hsa-miR-509-3p	miRNA	MIMAT0002881	Homo sapiens	FAM13A-AS1	lncRNA	285512	Homo sapiens	CLIP-seq	starBase	None	0.5483
RAID00968669	hsa-miR-30e-5p	miRNA	MIMAT0000692	Homo sapiens	EPB41L4A-AS1	lncRNA	114915	Homo sapiens	CLIP-seq//Prediction	starBase//miRanda	None	0.6308
RAID00970958	hsa-miR-20a-5p	miRNA	MIMAT0000075	Homo sapiens	CCAT2	lncRNA	101805488	Homo sapiens	RT-PCR	NPInter	23796952	0.7311
RAID00971333	hsa-miR-4753-5p	miRNA	MIMAT0019890	Homo sapiens	BCYRN1	lncRNA	618	Homo sapiens	CLIP	NPInter	23846593	0.5483
RAID00971967	hsa-miR-106a-5p	miRNA	MIMAT0000103	Homo sapiens	FAM87B	lncRNA	400728	Homo sapiens	CLIP	NPInter	25531890	0.5483
RAID00971978	hsa-miR-6878-3p	miRNA	MIMAT0027657	Homo sapiens	LINC00598	lncRNA	646982	Homo sapiens	CLIP-seq	miRTarBase	23313552	0.5483
RAID00972991	hsa-miR-302c-3p	miRNA	MIMAT0000717	Homo sapiens	MIR17HG	lncRNA	407975	Homo sapiens	CLIP-seq//Prediction	starBase//miRanda	None	0.6308
RAID00974002	hsa-miR-4699-3p	miRNA	MIMAT0019795	Homo sapiens	MIR22HG	lncRNA	84981	Homo sapiens	CLIP	NPInter	23846593	0.5483
RAID00975824	hsa-miR-106a-5p	miRNA	MIMAT0000103	Homo sapiens	ZNF638-IT1	lncRNA	100507113	Homo sapiens	CLIP	NPInter	25531890	0.5483
RAID00976377	hsa-miR-106a-5p	miRNA	MIMAT0000103	Homo sapiens	LINC00324	lncRNA	284029	Homo sapiens	CLIP	NPInter	25531890	0.5483
RAID00976669	hsa-miR-29b-3p	miRNA	MIMAT0000100	Homo sapiens	SNHG20	lncRNA	654434	Homo sapiens	CLIP-seq//Prediction	starBase//miRanda	None	0.6308
RAID00977318	hsa-miR-450b-5p	miRNA	MIMAT0004909	Homo sapiens	LINC00598	lncRNA	646982	Homo sapiens	PAR-CLIP	miRTarBase	22012620	0.5483
RAID00978621	hsa-miR-378a-3p	miRNA	MIMAT0000732	Homo sapiens	JPX	lncRNA	554203	Homo sapiens	CLIP-seq//Prediction	starBase//miRanda	None	0.6308
RAID00980714	hsa-miR-448	miRNA	MIMAT0001532	Homo sapiens	LINC00955	lncRNA	285492	Homo sapiens	PAR-CLIP	miRTarBase	21572407	0.5483
RAID00981171	hsa-miR-449c-5p	miRNA	MIMAT0010251	Homo sapiens	XIST	lncRNA	7503	Homo sapiens	CLIP	NPInter	23846593	0.5483
RAID00981526	hsa-miR-203a-3p	miRNA	MIMAT0000264	Homo sapiens	HULC	lncRNA	728655	Homo sapiens	Reporter Assay//RT-PCR//Western Blot//Prediction	RAID//miRanda	26179263	0.9612
RAID00983351	hsa-miR-3064-3p	miRNA	MIMAT0019865	Homo sapiens	XIST	lncRNA	7503	Homo sapiens	CLIP	NPInter	23846593	0.5483
RAID00983902	hsa-miR-106a-5p	miRNA	MIMAT0000103	Homo sapiens	LINC00305	lncRNA	221241	Homo sapiens	CLIP	NPInter	25531890	0.5483
RAID00984648	hsa-miR-373-3p	miRNA	MIMAT0000726	Homo sapiens	CROCCP2	lncRNA	84809	Homo sapiens	CLIP-seq	starBase	None	0.5483
RAID00985352	hsa-miR-4477b	miRNA	MIMAT0019005	Homo sapiens	XIST	lncRNA	7503	Homo sapiens	CLIP	NPInter	23846593	0.5483
RAID00986292	hsa-miR-1304-3p	miRNA	MIMAT0022720	Homo sapiens	OIP5-AS1	lncRNA	729082	Homo sapiens	CLIP	NPInter	23846593	0.5483
RAID00987873	hsa-miR-548y	miRNA	MIMAT0018354	Homo sapiens	MALAT1	lncRNA	378938	Homo sapiens	CLIP	NPInter	23846593	0.5483
RAID00989326	hsa-miR-5582-3p	miRNA	MIMAT0022280	Homo sapiens	XIST	lncRNA	7503	Homo sapiens	CLIP	NPInter	23846593	0.5483
RAID00989952	hsa-let-7b-5p	miRNA	MIMAT0000063	Homo sapiens	OLMALINC	lncRNA	90271	Homo sapiens	CLIP-seq//Prediction	starBase//miRanda	None	0.6308
RAID00990295	hsa-miR-16-5p	miRNA	MIMAT0000069	Homo sapiens	XIST	lncRNA	7503	Homo sapiens	CLIP	NPInter	23846593	0.5483
RAID00990917	hsa-mir-133a-2	miRNA	MI0000451	Homo sapiens	LINCMD1	lncRNA	101154644	Homo sapiens	ChIP (chromatin immunoprecipitation assay)	NPInter	22000014	0.5483
RAID00991295	hsa-let-7f-5p	miRNA	MIMAT0000067	Homo sapiens	TTTY15	lncRNA	64595	Homo sapiens	CLIP-seq//Prediction	starBase//miRanda	None	0.6308
RAID00992759	hsa-miR-485-5p	miRNA	MIMAT0002175	Homo sapiens	UCA1	lncRNA	652995	Homo sapiens	RIP (RNA Immunoprecipitation)//RT-PCR//Reporter Assay//Prediction	RAID//miRanda	26867765	0.9612
RAID00997819	hsa-miR-4755-5p	miRNA	MIMAT0019895	Homo sapiens	LINC00598	lncRNA	646982	Homo sapiens	CLIP-seq	miRTarBase	23824327	0.5483
RAID00999638	hsa-miR-148a-3p	miRNA	MIMAT0000243	Homo sapiens	CRHR1-IT1	lncRNA	147081	Homo sapiens	CLIP-seq//Prediction	starBase//miRanda	None	0.6308
RAID01001855	hsa-miR-216a-5p	miRNA	MIMAT0000273	Homo sapiens	A1BG-AS1	lncRNA	503538	Homo sapiens	CLIP-seq//Prediction	starBase//miRanda	None	0.6308
RAID01001980	hsa-miR-205-5p	miRNA	MIMAT0000266	Homo sapiens	PAPPA-AS1	lncRNA	493913	Homo sapiens	CLIP-seq	miRTarBase	23824327	0.5483
RAID01003633	hsa-let-7i-5p	miRNA	MIMAT0000415	Homo sapiens	OLMALINC	lncRNA	90271	Homo sapiens	CLIP-seq//Prediction	starBase//miRanda	None	0.6308
RAID01005959	hsa-miR-373-3p	miRNA	MIMAT0000726	Homo sapiens	MIR17HG	lncRNA	407975	Homo sapiens	CLIP-seq//Prediction	starBase//miRanda	None	0.6308
RAID01008545	hsa-miR-182-5p	miRNA	MIMAT0000259	Homo sapiens	MCM3AP-AS1	lncRNA	114044	Homo sapiens	CLIP-seq//Prediction	starBase//miRanda	None	0.6308
RAID01011281	hsa-miR-106a-5p	miRNA	MIMAT0000103	Homo sapiens	LINC00319	lncRNA	284836	Homo sapiens	CLIP	NPInter	25531890	0.5483
RAID01014200	hsa-miR-598-3p	miRNA	MIMAT0003266	Homo sapiens	OIP5-AS1	lncRNA	729082	Homo sapiens	CLIP	NPInter	23846593	0.5483
RAID01022020	hsa-miR-93-5p	miRNA	MIMAT0000093	Homo sapiens	E2F3P1	lncRNA	1872	Homo sapiens	Reporter Assay//RT-PCR	RAID	20577206	0.8808
RAID01023414	hsa-miR-4751	miRNA	MIMAT0019888	Homo sapiens	BCYRN1	lncRNA	618	Homo sapiens	CLIP	NPInter	23846593	0.5483
RAID01023488	hsa-miR-34c-5p	miRNA	MIMAT0000686	Homo sapiens	PTENP1	lncRNA	11191	Homo sapiens	RT-PCR	miRTarBase	24367666	0.7311
RAID01024073	hsa-miR-4468	miRNA	MIMAT0018995	Homo sapiens	MIR22HG	lncRNA	84981	Homo sapiens	CLIP	NPInter	23846593	0.5483
RAID01024905	hsa-miR-186-3p	miRNA	MIMAT0004612	Homo sapiens	LINC00598	lncRNA	646982	Homo sapiens	CLIP-seq	miRTarBase	23313552	0.5483
RAID01026498	hsa-miR-431-5p	miRNA	MIMAT0001625	Homo sapiens	LOC645166	lncRNA	645166	Homo sapiens	CLIP-seq//Prediction	starBase//miRanda	None	0.6308
RAID01031238	hsa-miR-3686	miRNA	MIMAT0018114	Homo sapiens	MALAT1	lncRNA	378938	Homo sapiens	CLIP	NPInter	23846593	0.5483
RAID01031988	hsa-miR-320a	miRNA	MIMAT0000510	Homo sapiens	XIST	lncRNA	7503	Homo sapiens	CLIP	NPInter	23846593	0.5483
RAID01034425	hsa-miR-3152-5p	miRNA	MIMAT0019207	Homo sapiens	HNRNPU	lncRNA	3192	Homo sapiens	CLIP	NPInter	23846593	0.5483
RAID01034452	hsa-miR-548e-3p	miRNA	MIMAT0005874	Homo sapiens	MALAT1	lncRNA	378938	Homo sapiens	CLIP	NPInter	23846593	0.5483
RAID01037685	hsa-let-7g-5p	miRNA	MIMAT0000414	Homo sapiens	KRASP1	lncRNA	3844	Homo sapiens	Reporter Assay//RT-PCR	RAID	20577206	0.8808
RAID01038147	hsa-miR-6129	miRNA	MIMAT0024613	Homo sapiens	MALAT1	lncRNA	378938	Homo sapiens	CLIP	NPInter	23846593	0.5483
RAID01038576	hsa-miR-6780a-5p	miRNA	MIMAT0027460	Homo sapiens	LINC00598	lncRNA	646982	Homo sapiens	CLIP-seq	miRTarBase	23824327	0.5483
RAID01038853	hsa-miR-130a-3p	miRNA	MIMAT0000425	Homo sapiens	H19	lncRNA	283120	Homo sapiens	CLIP-seq//Prediction	starBase//miRanda	None	0.6308
RAID01043396	hsa-miR-218-5p	miRNA	MIMAT0000275	Homo sapiens	LINC01590	lncRNA	63914	Homo sapiens	CLIP-seq//Prediction	starBase//miRanda	None	0.6308
RAID01046344	hsa-miR-140-5p	miRNA	MIMAT0000431	Homo sapiens	SNHG20	lncRNA	654434	Homo sapiens	CLIP-seq//Prediction	starBase//miRanda	None	0.6308
RAID01051127	hsa-miR-106a-5p	miRNA	MIMAT0000103	Homo sapiens	CABIN1	lncRNA	23523	Homo sapiens	CLIP	NPInter	25531890	0.5483
RAID01051532	hsa-miR-409-3p	miRNA	MIMAT0001639	Homo sapiens	FAM13A-AS1	lncRNA	285512	Homo sapiens	CLIP-seq	starBase	None	0.5483
RAID01051703	hsa-miR-107	miRNA	MIMAT0000104	Homo sapiens	BCYRN1	lncRNA	618	Homo sapiens	CLIP	NPInter	23846593	0.5483
RAID01053832	hsa-miR-548b-3p	miRNA	MIMAT0003254	Homo sapiens	XIST	lncRNA	7503	Homo sapiens	CLIP	NPInter	23846593	0.5483
RAID01057491	hsa-miR-216a-5p	miRNA	MIMAT0000273	Homo sapiens	XIST	lncRNA	7503	Homo sapiens	CLIP	NPInter	23846593	0.5483
RAID01057507	hsa-miR-3919	miRNA	MIMAT0018193	Homo sapiens	XIST	lncRNA	7503	Homo sapiens	CLIP	NPInter	23846593	0.5483
RAID01058112	hsa-miR-19b-1-5p	miRNA	MIMAT0004491	Homo sapiens	OIP5-AS1	lncRNA	729082	Homo sapiens	CLIP	NPInter	23846593	0.5483
RAID01058384	hsa-miR-101-5p	miRNA	MIMAT0004513	Homo sapiens	WT1-AS	lncRNA	51352	Homo sapiens	CLIP	NPInter	23846593	0.5483
RAID01060294	hsa-miR-6771-3p	miRNA	MIMAT0027443	Homo sapiens	LINC00346	lncRNA	283487	Homo sapiens	CLIP-seq	miRTarBase	23313552	0.5483
RAID01061057	hsa-miR-4722-3p	miRNA	MIMAT0019837	Homo sapiens	XIST	lncRNA	7503	Homo sapiens	CLIP	NPInter	23846593	0.5483
RAID01061933	hsa-miR-106a-5p	miRNA	MIMAT0000103	Homo sapiens	RHPN1-AS1	lncRNA	78998	Homo sapiens	CLIP	NPInter	25531890	0.5483
RAID01062504	hsa-miR-4510	miRNA	MIMAT0019047	Homo sapiens	LINC00598	lncRNA	646982	Homo sapiens	PAR-CLIP	miRTarBase	23592263	0.5483
RAID01064174	hsa-miR-4743-3p	miRNA	MIMAT0022978	Homo sapiens	WT1-AS	lncRNA	51352	Homo sapiens	CLIP	NPInter	23846593	0.5483
RAID01065787	hsa-miR-4511	miRNA	MIMAT0019048	Homo sapiens	MALAT1	lncRNA	378938	Homo sapiens	CLIP	NPInter	23846593	0.5483
RAID01066545	hsa-miR-520e	miRNA	MIMAT0002825	Homo sapiens	LINC00598	lncRNA	646982	Homo sapiens	CLIP-seq	miRTarBase	23313552	0.5483
RAID01068071	hsa-miR-485-5p	miRNA	MIMAT0002175	Homo sapiens	CRHR1-IT1	lncRNA	147081	Homo sapiens	CLIP-seq//Prediction	starBase//miRanda	None	0.6308
RAID01068669	hsa-miR-3942-3p	miRNA	MIMAT0019230	Homo sapiens	BDNF-AS	lncRNA	497258	Homo sapiens	PAR-CLIP	miRTarBase	23592263	0.5483
RAID01071630	mmu-miR-27b-3p	miRNA	MIMAT0000126	Mus musculus	AI504432	lncRNA	229694	Mus musculus	CLIP-seq	starBase	None	0.5483
RAID01073433	hsa-miR-196b-5p	miRNA	MIMAT0001080	Homo sapiens	KIAA0125	lncRNA	9834	Homo sapiens	CLIP-seq	starBase	None	0.5483
RAID01073757	hsa-miR-218-5p	miRNA	MIMAT0000275	Homo sapiens	ASB16-AS1	lncRNA	339201	Homo sapiens	CLIP-seq//Prediction	starBase//miRanda	None	0.6308
RAID01074082	hsa-miR-92a-1-5p	miRNA	MIMAT0004507	Homo sapiens	XIST	lncRNA	7503	Homo sapiens	CLIP	NPInter	23846593	0.5483
RAID01074755	hsa-miR-140-5p	miRNA	MIMAT0000431	Homo sapiens	HCP5	lncRNA	10866	Homo sapiens	CLIP-seq//Prediction	starBase//miRanda	None	0.6308
RAID01074940	hsa-miR-3613-3p	miRNA	MIMAT0017991	Homo sapiens	LINC00598	lncRNA	646982	Homo sapiens	PAR-CLIP	miRTarBase	22012620	0.5483
RAID01075460	hsa-miR-193b-3p	miRNA	MIMAT0002819	Homo sapiens	JPX	lncRNA	554203	Homo sapiens	CLIP-seq//Prediction	starBase//miRanda	None	0.6308
RAID01078172	hsa-miR-33a-5p	miRNA	MIMAT0000091	Homo sapiens	JPX	lncRNA	554203	Homo sapiens	CLIP-seq//Prediction	starBase//miRanda	None	0.6308
RAID01078179	hsa-miR-875-5p	miRNA	MIMAT0004922	Homo sapiens	CTBP1-AS2	lncRNA	92070	Homo sapiens	CLIP-seq//Prediction	starBase//miRanda	None	0.6308
RAID01079948	hsa-miR-543	miRNA	MIMAT0004954	Homo sapiens	IPW	lncRNA	3653	Homo sapiens	CLIP-seq//Prediction	starBase//miRanda	None	0.6308
RAID01080175	hsa-miR-3686	miRNA	MIMAT0018114	Homo sapiens	WT1-AS	lncRNA	51352	Homo sapiens	CLIP	NPInter	23846593	0.5483
RAID01080272	hsa-let-7b-5p	miRNA	MIMAT0000063	Homo sapiens	CTBP1-AS2	lncRNA	92070	Homo sapiens	CLIP-seq//Prediction	starBase//miRanda	None	0.6308
RAID01081694	hsa-miR-96-5p	miRNA	MIMAT0000095	Homo sapiens	XIST	lncRNA	7503	Homo sapiens	CLIP	NPInter	23846593	0.5483
RAID01085432	hsa-miR-590-3p	miRNA	MIMAT0004801	Homo sapiens	URB1-AS1	lncRNA	84996	Homo sapiens	CLIP-seq//Prediction	starBase//miRanda	None	0.6308
RAID01087156	hsa-miR-216b-5p	miRNA	MIMAT0004959	Homo sapiens	TUG1	lncRNA	55000	Homo sapiens	CLIP-seq//Prediction	starBase//miRanda	None	0.6308
RAID01087187	hsa-miR-30c-5p	miRNA	MIMAT0000244	Homo sapiens	EPB41L4A-AS1	lncRNA	114915	Homo sapiens	CLIP-seq//Prediction	starBase//miRanda	None	0.6308
RAID01087282	hsa-miR-148b-3p	miRNA	MIMAT0000759	Homo sapiens	LINC00521	lncRNA	256369	Homo sapiens	Microarray	miRTarBase	17612493	0.5483
RAID01087475	hsa-miR-106a-5p	miRNA	MIMAT0000103	Homo sapiens	SMAD5-AS1	lncRNA	9597	Homo sapiens	CLIP	NPInter	25531890	0.5483
RAID01088018	hsa-let-7g-5p	miRNA	MIMAT0000414	Homo sapiens	MGC12916	lncRNA	84815	Homo sapiens	CLIP-seq//Prediction	starBase//miRanda	None	0.6308
RAID01092870	hsa-miR-550b-2-5p	miRNA	MIMAT0022737	Homo sapiens	BCYRN1	lncRNA	618	Homo sapiens	CLIP	NPInter	23846593	0.5483
RAID01094205	hsa-miR-30a-5p	miRNA	MIMAT0000087	Homo sapiens	EPB41L4A-AS1	lncRNA	114915	Homo sapiens	CLIP-seq//Prediction	starBase//miRanda	None	0.6308
RAID01095553	hsa-miR-548aj-5p	miRNA	MIMAT0022739	Homo sapiens	LINC00598	lncRNA	646982	Homo sapiens	PAR-CLIP	miRTarBase	22012620	0.5483
RAID01096354	hsa-miR-122-5p	miRNA	MIMAT0000421	Homo sapiens	CDKN2B-AS1	lncRNA	100048912	Homo sapiens	CLIP-seq//Prediction	starBase//miRanda	None	0.6308
RAID01096985	hsa-miR-6881-3p	miRNA	MIMAT0027663	Homo sapiens	LINC00598	lncRNA	646982	Homo sapiens	CLIP-seq	miRTarBase	23824327	0.5483
RAID01097768	hsa-miR-27b-3p	miRNA	MIMAT0000419	Homo sapiens	BDNF-AS	lncRNA	497258	Homo sapiens	PAR-CLIP	miRTarBase	23592263	0.5483
RAID01100763	hsa-miR-548as-3p	miRNA	MIMAT0022268	Homo sapiens	MALAT1	lncRNA	378938	Homo sapiens	CLIP	NPInter	23846593	0.5483
RAID01102016	hsa-miR-4463	miRNA	MIMAT0018987	Homo sapiens	SNHG1	lncRNA	23642	Homo sapiens	CLIP	NPInter	23846593	0.5483
RAID01102407	hsa-miR-497-5p	miRNA	MIMAT0002820	Homo sapiens	TEX41	lncRNA	401014	Homo sapiens	CLIP-seq//Prediction	starBase//miRanda	None	0.6308
RAID01102604	hsa-miR-199b-5p	miRNA	MIMAT0000263	Homo sapiens	ST7-OT3	lncRNA	93655	Homo sapiens	CLIP-seq//Prediction	starBase//miRanda	None	0.6308
RAID01103482	hsa-miR-4518	miRNA	MIMAT0019055	Homo sapiens	OIP5-AS1	lncRNA	729082	Homo sapiens	CLIP	NPInter	23846593	0.5483
RAID01104172	hsa-miR-129-5p	miRNA	MIMAT0000242	Homo sapiens	MGC12916	lncRNA	84815	Homo sapiens	CLIP-seq//Prediction	starBase//miRanda	None	0.6308
RAID01104561	hsa-miR-106a-5p	miRNA	MIMAT0000103	Homo sapiens	WHAMMP2	lncRNA	440253	Homo sapiens	CLIP-seq//Prediction	starBase//miRanda	None	0.6308
RAID01106455	hsa-miR-199a-3p	miRNA	MIMAT0000232	Homo sapiens	LOC93622	lncRNA	93622	Homo sapiens	CLIP-seq	starBase	None	0.5483
RAID01107169	hsa-miR-4640-3p	miRNA	MIMAT0019700	Homo sapiens	MALAT1	lncRNA	378938	Homo sapiens	CLIP	NPInter	23846593	0.5483
RAID01107933	hsa-miR-3653-5p	miRNA	MIMAT0032110	Homo sapiens	DLEU1	lncRNA	10301	Homo sapiens	CLIP-seq	miRTarBase	23824327	0.5483
RAID01109638	hsa-miR-363-3p	miRNA	MIMAT0000707	Homo sapiens	IPW	lncRNA	3653	Homo sapiens	CLIP-seq//Prediction	starBase//miRanda	None	0.6308
RAID01109877	hsa-miR-106a-5p	miRNA	MIMAT0000103	Homo sapiens	CROCCP2	lncRNA	84809	Homo sapiens	CLIP-seq//CLIP	NPInter//starBase	25531890	0.6606
RAID01110347	mmu-let-7i-5p	miRNA	MIMAT0000122	Mus musculus	Rab10os	lncRNA	74173	Mus musculus	CLIP-seq	starBase	None	0.5483
RAID01110763	hsa-miR-7977	miRNA	MIMAT0031180	Homo sapiens	LINC00598	lncRNA	646982	Homo sapiens	CLIP-seq	miRTarBase	23824327	0.5483
RAID01111656	hsa-miR-135a-5p	miRNA	MIMAT0000428	Homo sapiens	OIP5-AS1	lncRNA	729082	Homo sapiens	CLIP	NPInter	23846593	0.5483
RAID01112039	hsa-miR-520f-3p	miRNA	MIMAT0002830	Homo sapiens	XIST	lncRNA	7503	Homo sapiens	CLIP	NPInter	23846593	0.5483
RAID01112588	hsa-miR-30c-5p	miRNA	MIMAT0000244	Homo sapiens	CTBP1-AS2	lncRNA	92070	Homo sapiens	CLIP-seq//Prediction	starBase//miRanda	None	0.6308
RAID01114810	hsa-miR-616-3p	miRNA	MIMAT0004805	Homo sapiens	HNRNPU	lncRNA	3192	Homo sapiens	CLIP	NPInter	23846593	0.5483
RAID01115732	hsa-miR-330-5p	miRNA	MIMAT0004693	Homo sapiens	MALAT1	lncRNA	378938	Homo sapiens	CLIP	NPInter	23846593	0.5483
RAID01118571	hsa-miR-93-5p	miRNA	MIMAT0000093	Homo sapiens	PTENP1	lncRNA	11191	Homo sapiens	CLIP-seq//Prediction	starBase//miRanda	None	0.6308
RAID01118769	hsa-miR-4438	miRNA	MIMAT0018956	Homo sapiens	MIR155HG	lncRNA	114614	Homo sapiens	CLIP	NPInter	23846593	0.5483
RAID01121292	hsa-miR-647	miRNA	MIMAT0003317	Homo sapiens	MIR22HG	lncRNA	84981	Homo sapiens	CLIP	NPInter	23846593	0.5483
RAID01122119	hsa-miR-4264	miRNA	MIMAT0016899	Homo sapiens	DLEU1	lncRNA	10301	Homo sapiens	CLIP-seq	miRTarBase	23824327	0.5483
RAID01122943	hsa-miR-22-3p	miRNA	MIMAT0000077	Homo sapiens	MALAT1	lncRNA	378938	Homo sapiens	RIP (RNA Immunoprecipitation)//RT-PCR//Reporter Assay	RAID	26364720	0.9526
RAID01123414	hsa-miR-3613-3p	miRNA	MIMAT0017991	Homo sapiens	XIST	lncRNA	7503	Homo sapiens	CLIP	NPInter	23846593	0.5483
RAID01128734	hsa-miR-4728-3p	miRNA	MIMAT0019850	Homo sapiens	HNRNPU	lncRNA	3192	Homo sapiens	CLIP	NPInter	23846593	0.5483
RAID01128974	hsa-miR-134-5p	miRNA	MIMAT0000447	Homo sapiens	LINC00852	lncRNA	84657	Homo sapiens	CLIP-seq//Prediction	starBase//miRanda	None	0.6308
RAID01129352	hsa-miR-6794-5p	miRNA	MIMAT0027488	Homo sapiens	BDNF-AS	lncRNA	497258	Homo sapiens	PAR-CLIP	miRTarBase	23592263	0.5483
RAID01130244	hsa-miR-301b-3p	miRNA	MIMAT0004958	Homo sapiens	XIST	lncRNA	7503	Homo sapiens	CLIP	NPInter	23846593	0.5483
RAID01130399	hsa-miR-136-5p	miRNA	MIMAT0000448	Homo sapiens	TP73-AS1	lncRNA	57212	Homo sapiens	CLIP-seq	starBase	None	0.5483
RAID01131627	hsa-miR-497-5p	miRNA	MIMAT0002820	Homo sapiens	EPB41L4A-AS1	lncRNA	114915	Homo sapiens	CLIP-seq//Prediction	starBase//miRanda	None	0.6308
RAID01132982	hsa-miR-6860	miRNA	MIMAT0027622	Homo sapiens	LINC00346	lncRNA	283487	Homo sapiens	CLIP-seq	miRTarBase	23824327	0.5483
RAID01133039	hsa-miR-4768-3p	miRNA	MIMAT0019921	Homo sapiens	LINC00598	lncRNA	646982	Homo sapiens	CLIP-seq	miRTarBase	23824327	0.5483
RAID01136988	hsa-miR-6811-3p	miRNA	MIMAT0027523	Homo sapiens	LINC00346	lncRNA	283487	Homo sapiens	CLIP-seq	miRTarBase	23824327	0.5483
RAID01138940	hsa-miR-5684	miRNA	MIMAT0022473	Homo sapiens	OIP5-AS1	lncRNA	729082	Homo sapiens	CLIP	NPInter	23846593	0.5483
RAID01142211	hsa-miR-16-5p	miRNA	MIMAT0000069	Homo sapiens	LINC00339	lncRNA	29092	Homo sapiens	CLIP-seq//Prediction	starBase//miRanda	None	0.6308
RAID01142805	hsa-miR-4758-3p	miRNA	MIMAT0019904	Homo sapiens	MALAT1	lncRNA	378938	Homo sapiens	CLIP	NPInter	23846593	0.5483
RAID01142923	hsa-miR-135a-5p	miRNA	MIMAT0000428	Homo sapiens	HNRNPU	lncRNA	3192	Homo sapiens	CLIP	NPInter	23846593	0.5483
RAID01143117	mmu-miR-130b-3p	miRNA	MIMAT0000387	Mus musculus	Trp53cor1	lncRNA	100504267	Mus musculus	RIP (RNA Immunoprecipitation)//RT-PCR//Reporter Assay	RAID	26273737	0.9526
RAID01143867	hsa-miR-4526	miRNA	MIMAT0019065	Homo sapiens	LINC00324	lncRNA	284029	Homo sapiens	CLIP	NPInter	23846593	0.5483
RAID01144269	hsa-miR-548h-5p	miRNA	MIMAT0005928	Homo sapiens	XIST	lncRNA	7503	Homo sapiens	CLIP	NPInter	23846593	0.5483
RAID01144522	hsa-miR-30b-3p	miRNA	MIMAT0004589	Homo sapiens	LINC00598	lncRNA	646982	Homo sapiens	CLIP-seq	miRTarBase	23824327	0.5483
RAID01145522	hsa-miR-93-5p	miRNA	MIMAT0000093	Homo sapiens	HCP5	lncRNA	10866	Homo sapiens	CLIP-seq//Prediction	miRTarBase//miRanda	22473208	0.6308
RAID01147694	hsa-miR-6128	miRNA	MIMAT0024611	Homo sapiens	WT1-AS	lncRNA	51352	Homo sapiens	CLIP	NPInter	23846593	0.5483
RAID01147709	hsa-miR-3120-5p	miRNA	MIMAT0019198	Homo sapiens	WT1-AS	lncRNA	51352	Homo sapiens	CLIP	NPInter	23846593	0.5483
RAID01148724	hsa-miR-4672	miRNA	MIMAT0019754	Homo sapiens	XIST	lncRNA	7503	Homo sapiens	CLIP	NPInter	23846593	0.5483
RAID01150519	hsa-miR-301b-3p	miRNA	MIMAT0004958	Homo sapiens	LINC00339	lncRNA	29092	Homo sapiens	CLIP-seq//Prediction	starBase//miRanda	None	0.6308
RAID01151900	hsa-miR-204-3p	miRNA	MIMAT0022693	Homo sapiens	XIST	lncRNA	7503	Homo sapiens	CLIP	NPInter	23846593	0.5483
RAID01152447	mmu-miR-471-5p	miRNA	MIMAT0002112	Mus musculus	D030047H15Rik	lncRNA	100037396	Mus musculus	CLIP-seq	starBase	None	0.5483
RAID01153081	hsa-miR-30a-5p	miRNA	MIMAT0000087	Homo sapiens	CTBP1-AS2	lncRNA	92070	Homo sapiens	CLIP-seq//Prediction	starBase//miRanda	None	0.6308
RAID01154688	hsa-miR-211-5p	miRNA	MIMAT0000268	Homo sapiens	LINC00472	lncRNA	79940	Homo sapiens	CLIP-seq	starBase	None	0.5483
RAID01154974	hsa-miR-5582-5p	miRNA	MIMAT0022279	Homo sapiens	XIST	lncRNA	7503	Homo sapiens	CLIP	NPInter	23846593	0.5483
RAID01158744	hsa-miR-6127	miRNA	MIMAT0024610	Homo sapiens	LRRC75A-AS1	lncRNA	125144	Homo sapiens	CLIP	NPInter	23846593	0.5483
RAID01159793	hsa-miR-25-3p	miRNA	MIMAT0000081	Homo sapiens	MALAT1	lncRNA	378938	Homo sapiens	CLIP	NPInter	23846593	0.5483
RAID01160233	hsa-miR-5582-3p	miRNA	MIMAT0022280	Homo sapiens	BCYRN1	lncRNA	618	Homo sapiens	CLIP	NPInter	23846593	0.5483
RAID01160429	mmu-miR-32-5p	miRNA	MIMAT0000654	Mus musculus	6330403K07Rik	lncRNA	103712	Mus musculus	CLIP-seq	starBase	None	0.5483
RAID01162281	hsa-miR-9-5p	miRNA	MIMAT0000441	Homo sapiens	MALAT1	lncRNA	378938	Homo sapiens	IP (immunoprecipitation)//ISH (In Situ Hybridization)//Western Blot//Reporter Assay//RT-PCR//NGS (Next Generation Sequencing)	ncRDeathDB2.0//miRTarBase	25592968//23985560	0.997
RAID01163368	hsa-miR-195-5p	miRNA	MIMAT0000461	Homo sapiens	LINC00339	lncRNA	29092	Homo sapiens	CLIP-seq//Prediction	starBase//miRanda	None	0.6308
RAID01163469	hsa-miR-106a-5p	miRNA	MIMAT0000103	Homo sapiens	FMR1-IT1	lncRNA	106478973	Homo sapiens	CLIP	NPInter	25531890	0.5483
RAID01164027	hsa-miR-761	miRNA	MIMAT0010364	Homo sapiens	HNRNPU	lncRNA	3192	Homo sapiens	CLIP	NPInter	23846593	0.5483
RAID01164078	hsa-miR-128-3p	miRNA	MIMAT0000424	Homo sapiens	LINC00339	lncRNA	29092	Homo sapiens	CLIP-seq//Prediction	starBase//miRanda	None	0.6308
RAID01165131	hsa-miR-23b-3p	miRNA	MIMAT0000418	Homo sapiens	LINC00173	lncRNA	100287569	Homo sapiens	CLIP-seq//Prediction	starBase//miRanda	None	0.6308
RAID01168130	hsa-miR-106a-5p	miRNA	MIMAT0000103	Homo sapiens	SYNJ2-IT1	lncRNA	100874300	Homo sapiens	CLIP	NPInter	25531890	0.5483
RAID01168951	hsa-miR-485-5p	miRNA	MIMAT0002175	Homo sapiens	LINC00598	lncRNA	646982	Homo sapiens	CLIP-seq	miRTarBase	23824327	0.5483
RAID01169163	hsa-miR-185-5p	miRNA	MIMAT0000455	Homo sapiens	LOC93622	lncRNA	93622	Homo sapiens	CLIP-seq	starBase	None	0.5483
RAID01171862	hsa-miR-362-5p	miRNA	MIMAT0000705	Homo sapiens	XIST	lncRNA	7503	Homo sapiens	CLIP	NPInter	23846593	0.5483
RAID01176482	hsa-miR-548az-5p	miRNA	MIMAT0025456	Homo sapiens	MALAT1	lncRNA	378938	Homo sapiens	CLIP	NPInter	23846593	0.5483
RAID01176977	hsa-miR-212-5p	miRNA	MIMAT0022695	Homo sapiens	LINC00598	lncRNA	646982	Homo sapiens	CLIP-seq	miRTarBase	23313552	0.5483
RAID01177775	hsa-miR-106a-5p	miRNA	MIMAT0000103	Homo sapiens	LMO7-AS1	lncRNA	101927155	Homo sapiens	CLIP	NPInter	25531890	0.5483
RAID01177838	hsa-miR-5682	miRNA	MIMAT0022470	Homo sapiens	XIST	lncRNA	7503	Homo sapiens	CLIP	NPInter	23846593	0.5483
RAID01178317	hsa-miR-214-3p	miRNA	MIMAT0000271	Homo sapiens	LINC00339	lncRNA	29092	Homo sapiens	CLIP-seq//Prediction	starBase//miRanda	None	0.6308
RAID01178706	hsa-miR-548c-3p	miRNA	MIMAT0003285	Homo sapiens	SNHG1	lncRNA	23642	Homo sapiens	CLIP	NPInter	23846593	0.5483
RAID01179795	hsa-miR-4284	miRNA	MIMAT0016915	Homo sapiens	LINC00632	lncRNA	286411	Homo sapiens	CLIP-seq	miRTarBase	23824327	0.5483
RAID01182092	hsa-miR-4716-3p	miRNA	MIMAT0019827	Homo sapiens	OIP5-AS1	lncRNA	729082	Homo sapiens	CLIP	NPInter	23846593	0.5483
RAID01182094	hsa-miR-425-5p	miRNA	MIMAT0003393	Homo sapiens	MIR22HG	lncRNA	84981	Homo sapiens	CLIP//Prediction	NPInter//miRanda	23846593	0.6308
RAID01183337	hsa-miR-1255b-5p	miRNA	MIMAT0005945	Homo sapiens	OIP5-AS1	lncRNA	729082	Homo sapiens	CLIP	NPInter	23846593	0.5483
RAID01186133	hsa-miR-520a-5p	miRNA	MIMAT0002833	Homo sapiens	TP73-AS1	lncRNA	57212	Homo sapiens	CLIP-seq	starBase	None	0.5483
RAID01191073	hsa-miR-5006-3p	miRNA	MIMAT0021034	Homo sapiens	LINC00598	lncRNA	646982	Homo sapiens	CLIP-seq	miRTarBase	23824327	0.5483
RAID01197302	hsa-miR-216a-5p	miRNA	MIMAT0000273	Homo sapiens	HCP5	lncRNA	10866	Homo sapiens	CLIP-seq//Prediction	starBase//miRanda	None	0.6308
RAID01197757	hsa-miR-30d-5p	miRNA	MIMAT0000245	Homo sapiens	EPB41L4A-AS1	lncRNA	114915	Homo sapiens	CLIP-seq//Prediction	starBase//miRanda	None	0.6308
RAID01198089	hsa-miR-3192-5p	miRNA	MIMAT0015076	Homo sapiens	BCYRN1	lncRNA	618	Homo sapiens	CLIP	NPInter	23846593	0.5483
RAID01198317	hsa-miR-760	miRNA	MIMAT0004957	Homo sapiens	SNHG1	lncRNA	23642	Homo sapiens	CLIP	NPInter	23846593	0.5483
RAID01198806	hsa-miR-93-5p	miRNA	MIMAT0000093	Homo sapiens	XIST	lncRNA	7503	Homo sapiens	CLIP	NPInter	23846593	0.5483
RAID01200545	hsa-miR-145-5p	miRNA	MIMAT0000437	Homo sapiens	POU5F1P3	lncRNA	642559	Homo sapiens	Reporter Assay//RT-PCR	RAID	20577206	0.8808
RAID01207177	hsa-let-7d-5p	miRNA	MIMAT0000065	Homo sapiens	TTTY15	lncRNA	64595	Homo sapiens	CLIP-seq//Prediction	starBase//miRanda	None	0.6308
RAID01207813	hsa-miR-106a-5p	miRNA	MIMAT0000103	Homo sapiens	MIR210HG	lncRNA	100506211	Homo sapiens	CLIP	NPInter	25531890	0.5483
RAID01208910	hsa-miR-4703-3p	miRNA	MIMAT0019802	Homo sapiens	MALAT1	lncRNA	378938	Homo sapiens	CLIP	NPInter	23846593	0.5483
RAID01210790	hsa-miR-372-3p	miRNA	MIMAT0000724	Homo sapiens	HULC	lncRNA	728655	Homo sapiens	RT-PCR//EMSA (electrophoretic mobility shift assay)//Reporter Assay//Western Blot	RAID//NPInter//MNDR//LncRNADisease	21802130//21256239//20423907	0.982
RAID01211602	hsa-miR-217	miRNA	MIMAT0000274	Homo sapiens	XIST	lncRNA	7503	Homo sapiens	CLIP	NPInter	23846593	0.5483
RAID01212774	hsa-miR-532-3p	miRNA	MIMAT0004780	Homo sapiens	DLEU1	lncRNA	10301	Homo sapiens	CLIP-seq	miRTarBase	19536157	0.5483
RAID01212974	mmu-miR-434-3p	miRNA	MIMAT0001422	Mus musculus	5430405H02Rik	lncRNA	74487	Mus musculus	CLIP-seq	starBase	None	0.5483
RAID01213086	hsa-miR-214-5p	miRNA	MIMAT0004564	Homo sapiens	LINC00346	lncRNA	283487	Homo sapiens	CLIP-seq	miRTarBase	23824327	0.5483
RAID01214201	hsa-miR-652-5p	miRNA	MIMAT0022709	Homo sapiens	LRRC75A-AS1	lncRNA	125144	Homo sapiens	CLIP	NPInter	23846593	0.5483
RAID01219836	hsa-miR-20a-5p	miRNA	MIMAT0000075	Homo sapiens	HCP5	lncRNA	10866	Homo sapiens	CLIP-seq//Prediction	miRTarBase//miRanda	22473208	0.6308
RAID01220535	hsa-miR-653-5p	miRNA	MIMAT0003328	Homo sapiens	HCP5	lncRNA	10866	Homo sapiens	CLIP-seq//Prediction	starBase//miRanda	None	0.6308
RAID01224457	hsa-miR-9-5p	miRNA	MIMAT0000441	Homo sapiens	TUG1	lncRNA	55000	Homo sapiens	CLIP-seq//Prediction	starBase//miRanda	None	0.6308
RAID01224469	hsa-miR-6780a-5p	miRNA	MIMAT0027460	Homo sapiens	LINC00346	lncRNA	283487	Homo sapiens	CLIP-seq	miRTarBase	23824327	0.5483
RAID01225748	hsa-miR-22-5p	miRNA	MIMAT0004495	Homo sapiens	MIR22HG	lncRNA	84981	Homo sapiens	CLIP	NPInter	23846593	0.5483
RAID01226562	hsa-miR-509-5p	miRNA	MIMAT0004779	Homo sapiens	OIP5-AS1	lncRNA	729082	Homo sapiens	CLIP	NPInter	23846593	0.5483
RAID01227010	hsa-miR-106a-5p	miRNA	MIMAT0000103	Homo sapiens	C11orf95	lncRNA	65998	Homo sapiens	CLIP	NPInter	25531890	0.5483
RAID01227991	hsa-miR-106b-5p	miRNA	MIMAT0000680	Homo sapiens	BCYRN1	lncRNA	618	Homo sapiens	CLIP	NPInter	23846593	0.5483
RAID01231095	hsa-miR-3660	miRNA	MIMAT0018081	Homo sapiens	OIP5-AS1	lncRNA	729082	Homo sapiens	CLIP	NPInter	23846593	0.5483
RAID01231130	hsa-miR-4507	miRNA	MIMAT0019044	Homo sapiens	LINC00632	lncRNA	286411	Homo sapiens	CLIP-seq	miRTarBase	23824327	0.5483
RAID01231187	hsa-miR-373-3p	miRNA	MIMAT0000726	Homo sapiens	LINC00598	lncRNA	646982	Homo sapiens	CLIP-seq	miRTarBase	23313552	0.5483
RAID01231462	hsa-miR-196b-5p	miRNA	MIMAT0001080	Homo sapiens	TUG1	lncRNA	55000	Homo sapiens	CLIP-seq//Prediction	starBase//miRanda	None	0.6308
RAID01235654	hsa-miR-30b-3p	miRNA	MIMAT0004589	Homo sapiens	BCYRN1	lncRNA	618	Homo sapiens	CLIP	NPInter	23846593	0.5483
RAID01235810	hsa-miR-1304-3p	miRNA	MIMAT0022720	Homo sapiens	LINC00598	lncRNA	646982	Homo sapiens	CLIP-seq	miRTarBase	23824327	0.5483
RAID01237538	hsa-miR-34a-3p	miRNA	MIMAT0004557	Homo sapiens	XIST	lncRNA	7503	Homo sapiens	CLIP	NPInter	23846593	0.5483
RAID01237732	hsa-miR-552-3p	miRNA	MIMAT0003215	Homo sapiens	LINC00598	lncRNA	646982	Homo sapiens	CLIP-seq	miRTarBase	23313552	0.5483
RAID01238553	hsa-miR-196a-5p	miRNA	MIMAT0000226	Homo sapiens	H19	lncRNA	283120	Homo sapiens	CLIP-seq	starBase	None	0.5483
RAID01243101	hsa-miR-2681-3p	miRNA	MIMAT0013516	Homo sapiens	OIP5-AS1	lncRNA	729082	Homo sapiens	CLIP	NPInter	23846593	0.5483
RAID01243531	mmu-let-7b-5p	miRNA	MIMAT0000522	Mus musculus	Rab10os	lncRNA	74173	Mus musculus	CLIP-seq	starBase	None	0.5483
RAID01246578	hsa-miR-514a-5p	miRNA	MIMAT0022702	Homo sapiens	XIST	lncRNA	7503	Homo sapiens	CLIP	NPInter	23846593	0.5483
RAID01248359	hsa-miR-106a-5p	miRNA	MIMAT0000103	Homo sapiens	STK4-AS1	lncRNA	100505826	Homo sapiens	CLIP	NPInter	25531890	0.5483
RAID01248394	hsa-miR-518a-5p	miRNA	MIMAT0005457	Homo sapiens	TINCR	lncRNA	257000	Homo sapiens	CLIP-seq	starBase	None	0.5483
RAID01250013	hsa-miR-141-3p	miRNA	MIMAT0000432	Homo sapiens	H19	lncRNA	283120	Homo sapiens	IP (immunoprecipitation)//Reporter Assay//RT-PCR//Western Blot	RAID//LncRNA2Target	26853553//26160158//23222811	0.982
RAID01252688	hsa-miR-541-5p	miRNA	MIMAT0004919	Homo sapiens	BCYRN1	lncRNA	618	Homo sapiens	CLIP	NPInter	23846593	0.5483
RAID01255887	hsa-let-7e-3p	miRNA	MIMAT0004485	Homo sapiens	LINC00598	lncRNA	646982	Homo sapiens	CLIP-seq	miRTarBase	19536157	0.5483
RAID01259204	hsa-miR-3672	miRNA	MIMAT0018095	Homo sapiens	LINC00461	lncRNA	645323	Homo sapiens	CLIP	NPInter	23846593	0.5483
RAID01260206	hsa-miR-338-3p	miRNA	MIMAT0000763	Homo sapiens	ST7-OT3	lncRNA	93655	Homo sapiens	CLIP-seq//Prediction	starBase//miRanda	None	0.6308
RAID01265702	hsa-let-7c-5p	miRNA	MIMAT0000064	Homo sapiens	CDKN2B-AS1	lncRNA	100048912	Homo sapiens	CLIP-seq//Prediction	starBase//miRanda	None	0.6308
RAID01265810	hsa-let-7i-5p	miRNA	MIMAT0000415	Homo sapiens	TTTY15	lncRNA	64595	Homo sapiens	CLIP-seq//Prediction	starBase//miRanda	None	0.6308
RAID01266349	hsa-miR-485-3p	miRNA	MIMAT0002176	Homo sapiens	LINC00598	lncRNA	646982	Homo sapiens	PAR-CLIP	miRTarBase	20371350	0.5483
RAID01267366	hsa-miR-221-3p	miRNA	MIMAT0000278	Homo sapiens	LINC00339	lncRNA	29092	Homo sapiens	CLIP-seq//Prediction	starBase//miRanda	None	0.6308
RAID01269425	hsa-miR-1273e	miRNA	MIMAT0018079	Homo sapiens	LINC00346	lncRNA	283487	Homo sapiens	PAR-CLIP	miRTarBase	23592263//20371350	0.5483
RAID01271855	hsa-miR-106a-5p	miRNA	MIMAT0000103	Homo sapiens	MIR17HG	lncRNA	407975	Homo sapiens	CLIP	NPInter	25531890	0.5483
RAID01273534	hsa-miR-429	miRNA	MIMAT0001536	Homo sapiens	H19	lncRNA	283120	Homo sapiens	Western Blot//RT-PCR	LncRNA2Target	23222811	0.8808
RAID01274349	hsa-miR-182-5p	miRNA	MIMAT0000259	Homo sapiens	TEX41	lncRNA	401014	Homo sapiens	CLIP-seq//Prediction	starBase//miRanda	None	0.6308
RAID01276626	hsa-miR-1297	miRNA	MIMAT0005886	Homo sapiens	TUG1	lncRNA	55000	Homo sapiens	CLIP-seq//Prediction	starBase//miRanda	None	0.6308
RAID01277243	hsa-let-7f-5p	miRNA	MIMAT0000067	Homo sapiens	LINC00472	lncRNA	79940	Homo sapiens	CLIP-seq	starBase	None	0.5483
RAID01277685	hsa-miR-548c-5p	miRNA	MIMAT0004806	Homo sapiens	MALAT1	lncRNA	378938	Homo sapiens	CLIP	NPInter	23846593	0.5483
RAID01279501	hsa-miR-106a-5p	miRNA	MIMAT0000103	Homo sapiens	TTTY9A	lncRNA	83864	Homo sapiens	CLIP	NPInter	25531890	0.5483
RAID01280158	hsa-miR-4662a-5p	miRNA	MIMAT0019731	Homo sapiens	LINC00461	lncRNA	645323	Homo sapiens	CLIP	NPInter	23846593	0.5483
RAID01283631	hsa-miR-26b-5p	miRNA	MIMAT0000083	Homo sapiens	RAMP2-AS1	lncRNA	100190938	Homo sapiens	Microarray	miRTarBase	19088304	0.5483
RAID01284473	hsa-miR-619-5p	miRNA	MIMAT0026622	Homo sapiens	LINC00598	lncRNA	646982	Homo sapiens	CLIP-seq	miRTarBase	23313552	0.5483
RAID01285251	hsa-miR-26a-5p	miRNA	MIMAT0000082	Homo sapiens	HCG11	lncRNA	493812	Homo sapiens	CLIP-seq//Prediction	starBase//miRanda	None	0.6308
RAID01285646	hsa-miR-106a-5p	miRNA	MIMAT0000103	Homo sapiens	HYI-AS1	lncRNA	100873923	Homo sapiens	CLIP	NPInter	25531890	0.5483
RAID01286204	hsa-miR-515-5p	miRNA	MIMAT0002826	Homo sapiens	BCYRN1	lncRNA	618	Homo sapiens	CLIP	NPInter	23846593	0.5483
RAID01289244	hsa-miR-106a-5p	miRNA	MIMAT0000103	Homo sapiens	PINK1-AS	lncRNA	100861548	Homo sapiens	CLIP	NPInter	25531890	0.5483
RAID01290819	hsa-miR-4698	miRNA	MIMAT0019793	Homo sapiens	MIR155HG	lncRNA	114614	Homo sapiens	CLIP	NPInter	23846593	0.5483
RAID01291888	hsa-miR-5193	miRNA	MIMAT0021124	Homo sapiens	BCYRN1	lncRNA	618	Homo sapiens	CLIP	NPInter	23846593	0.5483
RAID01292538	hsa-miR-5004-3p	miRNA	MIMAT0021028	Homo sapiens	MALAT1	lncRNA	378938	Homo sapiens	CLIP	NPInter	23846593	0.5483
RAID01293350	hsa-miR-28-5p	miRNA	MIMAT0000085	Homo sapiens	LINC00346	lncRNA	283487	Homo sapiens	PAR-CLIP	miRTarBase	23592263//20371350	0.5483
RAID01293593	hsa-miR-5189-5p	miRNA	MIMAT0021120	Homo sapiens	SNHG3	lncRNA	8420	Homo sapiens	CLIP	NPInter	23846593	0.5483
RAID01294246	hsa-miR-383-5p	miRNA	MIMAT0000738	Homo sapiens	LINC00162	lncRNA	378825	Homo sapiens	Reporter Assay//Northern Blot//RT-PCR	RAID	26539909	0.9526
RAID01297430	hsa-miR-154-3p	miRNA	MIMAT0000453	Homo sapiens	MIR155HG	lncRNA	114614	Homo sapiens	CLIP	NPInter	23846593	0.5483
RAID01297456	hsa-miR-490-3p	miRNA	MIMAT0002806	Homo sapiens	MIR155HG	lncRNA	114614	Homo sapiens	CLIP-seq//Prediction	starBase//miRanda	None	0.6308
RAID01297561	hsa-miR-135b-5p	miRNA	MIMAT0000758	Homo sapiens	HNRNPU	lncRNA	3192	Homo sapiens	CLIP	NPInter	23846593	0.5483
RAID01298031	hsa-miR-4452	miRNA	MIMAT0018974	Homo sapiens	GAS5	lncRNA	60674	Homo sapiens	CLIP	NPInter	23846593	0.5483
RAID01300307	hsa-miR-1271-5p	miRNA	MIMAT0005796	Homo sapiens	MALAT1	lncRNA	378938	Homo sapiens	CLIP	NPInter	23846593	0.5483
RAID01303227	hsa-miR-887-5p	miRNA	MIMAT0026720	Homo sapiens	LINC00598	lncRNA	646982	Homo sapiens	CLIP-seq	miRTarBase	23824327	0.5483
RAID01303951	hsa-miR-6847-3p	miRNA	MIMAT0027595	Homo sapiens	LINC00346	lncRNA	283487	Homo sapiens	CLIP-seq	miRTarBase	23824327	0.5483
RAID01305591	hsa-miR-335-5p	miRNA	MIMAT0000765	Homo sapiens	LINC00487	lncRNA	400941	Homo sapiens	Microarray	miRTarBase	18185580	0.5483
RAID01306661	hsa-miR-3929	miRNA	MIMAT0018206	Homo sapiens	SNHG3	lncRNA	8420	Homo sapiens	CLIP	NPInter	23846593	0.5483
RAID01310308	hsa-miR-7977	miRNA	MIMAT0031180	Homo sapiens	LINC00346	lncRNA	283487	Homo sapiens	CLIP-seq	miRTarBase	23824327	0.5483
RAID01311647	hsa-miR-132-3p	miRNA	MIMAT0000426	Homo sapiens	ZNRD1-AS1	lncRNA	80862	Homo sapiens	CLIP-seq//Prediction	starBase//miRanda	None	0.6308
RAID01312286	hsa-miR-126-5p	miRNA	MIMAT0000444	Homo sapiens	MIR17HG	lncRNA	407975	Homo sapiens	CLIP-seq	starBase	None	0.5483
RAID01312571	hsa-let-7i-5p	miRNA	MIMAT0000415	Homo sapiens	CDKN2B-AS1	lncRNA	100048912	Homo sapiens	CLIP-seq//Prediction	starBase//miRanda	None	0.6308
RAID01319130	hsa-miR-520a-3p	miRNA	MIMAT0002834	Homo sapiens	LINC00598	lncRNA	646982	Homo sapiens	CLIP-seq	miRTarBase	23313552	0.5483
RAID01319547	hsa-miR-3145-3p	miRNA	MIMAT0015016	Homo sapiens	LINC00461	lncRNA	645323	Homo sapiens	CLIP	NPInter	23846593	0.5483
RAID01322037	hsa-miR-3682-5p	miRNA	MIMAT0019222	Homo sapiens	LINC00598	lncRNA	646982	Homo sapiens	CLIP-seq	miRTarBase	19536157	0.5483
RAID01325376	hsa-miR-106a-5p	miRNA	MIMAT0000103	Homo sapiens	ADAM20P1	lncRNA	317760	Homo sapiens	CLIP	NPInter	25531890	0.5483
RAID01327235	hsa-miR-4421	miRNA	MIMAT0018934	Homo sapiens	DLEU1	lncRNA	10301	Homo sapiens	CLIP-seq	miRTarBase	23824327	0.5483
RAID01327608	hsa-miR-181c-5p	miRNA	MIMAT0000258	Homo sapiens	LOC93622	lncRNA	93622	Homo sapiens	CLIP-seq//Prediction	starBase//miRanda	None	0.6308
RAID01329230	hsa-miR-1306-5p	miRNA	MIMAT0022726	Homo sapiens	BCYRN1	lncRNA	618	Homo sapiens	CLIP	NPInter	23846593	0.5483
RAID01329760	hsa-miR-136-5p	miRNA	MIMAT0000448	Homo sapiens	OIP5-AS1	lncRNA	729082	Homo sapiens	CLIP	NPInter	23846593	0.5483
RAID01332351	hsa-miR-1268b	miRNA	MIMAT0018925	Homo sapiens	SNHG3	lncRNA	8420	Homo sapiens	CLIP	NPInter	23846593	0.5483
RAID01332706	hsa-miR-371b-5p	miRNA	MIMAT0019892	Homo sapiens	DLEU1	lncRNA	10301	Homo sapiens	CLIP-seq	miRTarBase	23824327	0.5483
RAID01337898	hsa-miR-106a-5p	miRNA	MIMAT0000103	Homo sapiens	EPB41L4A-AS1	lncRNA	114915	Homo sapiens	CLIP	NPInter	25531890	0.5483
RAID01338664	hsa-miR-511-5p	miRNA	MIMAT0002808	Homo sapiens	BCYRN1	lncRNA	618	Homo sapiens	CLIP	NPInter	23846593	0.5483
RAID01340183	hsa-miR-374a-5p	miRNA	MIMAT0000727	Homo sapiens	ST20-AS1	lncRNA	283687	Homo sapiens	CLIP-seq//Prediction	starBase//miRanda	None	0.6308
RAID01343585	hsa-miR-29b-1-5p	miRNA	MIMAT0004514	Homo sapiens	BCYRN1	lncRNA	618	Homo sapiens	CLIP	NPInter	23846593	0.5483
RAID01346262	hsa-miR-6165	miRNA	MIMAT0024782	Homo sapiens	BCYRN1	lncRNA	618	Homo sapiens	CLIP	NPInter	23846593	0.5483
RAID01347952	hsa-miR-144-3p	miRNA	MIMAT0000436	Homo sapiens	WHAMMP2	lncRNA	440253	Homo sapiens	CLIP-seq//Prediction	starBase//miRanda	None	0.6308
RAID01349586	hsa-miR-194-5p	miRNA	MIMAT0000460	Homo sapiens	MCM3AP-AS1	lncRNA	114044	Homo sapiens	CLIP-seq//Prediction	starBase//miRanda	None	0.6308
RAID01349680	hsa-miR-5584-5p	miRNA	MIMAT0022283	Homo sapiens	OIP5-AS1	lncRNA	729082	Homo sapiens	CLIP	NPInter	23846593	0.5483
RAID01349836	hsa-miR-4699-5p	miRNA	MIMAT0019794	Homo sapiens	MALAT1	lncRNA	378938	Homo sapiens	CLIP	NPInter	23846593	0.5483
RAID01353387	hsa-miR-3609	miRNA	MIMAT0017986	Homo sapiens	GAS5	lncRNA	60674	Homo sapiens	CLIP	NPInter	23846593	0.5483
RAID01355615	hsa-miR-106a-5p	miRNA	MIMAT0000103	Homo sapiens	SNHG3	lncRNA	8420	Homo sapiens	CLIP	NPInter	25531890	0.5483
RAID01356979	hsa-miR-203a-3p	miRNA	MIMAT0000264	Homo sapiens	FAM201A	lncRNA	158228	Homo sapiens	CLIP-seq//Prediction	starBase//miRanda	None	0.6308
RAID01359173	hsa-miR-4704-5p	miRNA	MIMAT0019803	Homo sapiens	XIST	lncRNA	7503	Homo sapiens	CLIP	NPInter	23846593	0.5483
RAID01360629	hsa-miR-299-3p	miRNA	MIMAT0000687	Homo sapiens	PTENP1	lncRNA	11191	Homo sapiens	CLIP-seq	starBase	None	0.5483
RAID01362303	hsa-miR-217	miRNA	MIMAT0000274	Homo sapiens	CDKN2B-AS1	lncRNA	100048912	Homo sapiens	CLIP-seq//Prediction	starBase//miRanda	None	0.6308
RAID01363913	hsa-miR-30b-3p	miRNA	MIMAT0004589	Homo sapiens	LINC00346	lncRNA	283487	Homo sapiens	CLIP-seq	miRTarBase	23824327	0.5483
RAID01364339	hsa-miR-4453	miRNA	MIMAT0018975	Homo sapiens	MIR22HG	lncRNA	84981	Homo sapiens	CLIP	NPInter	23846593	0.5483
RAID01365939	hsa-miR-15a-5p	miRNA	MIMAT0000068	Homo sapiens	CTBP1-AS2	lncRNA	92070	Homo sapiens	CLIP-seq//Prediction	starBase//miRanda	None	0.6308
RAID01366135	hsa-miR-664a-3p	miRNA	MIMAT0005949	Homo sapiens	BCYRN1	lncRNA	618	Homo sapiens	CLIP	NPInter	23846593	0.5483
RAID01366976	hsa-miR-518f-5p	miRNA	MIMAT0002841	Homo sapiens	TP73-AS1	lncRNA	57212	Homo sapiens	CLIP-seq	starBase	None	0.5483
RAID01367221	hsa-miR-1297	miRNA	MIMAT0005886	Homo sapiens	MCM3AP-AS1	lncRNA	114044	Homo sapiens	CLIP-seq//Prediction	starBase//miRanda	None	0.6308
RAID01368045	hsa-miR-335-5p	miRNA	MIMAT0000765	Homo sapiens	LINC00266-1	lncRNA	140849	Homo sapiens	Microarray	miRTarBase	18185580	0.5483
RAID01369350	hsa-miR-301b-3p	miRNA	MIMAT0004958	Homo sapiens	CRHR1-IT1	lncRNA	147081	Homo sapiens	CLIP-seq//Prediction	starBase//miRanda	None	0.6308
RAID01371983	hsa-let-7b-5p	miRNA	MIMAT0000063	Homo sapiens	TTTY15	lncRNA	64595	Homo sapiens	CLIP-seq//Prediction	starBase//miRanda	None	0.6308
RAID01372078	hsa-miR-106a-5p	miRNA	MIMAT0000103	Homo sapiens	PART1	lncRNA	25859	Homo sapiens	CLIP	NPInter	25531890	0.5483
RAID01374145	hsa-miR-133b	miRNA	MIMAT0000770	Homo sapiens	LINCMD1	lncRNA	101154644	Homo sapiens	RT-PCR//RNA interference//Reporter Assay//ChIP (chromatin immunoprecipitation assay)	RAID//NPInter//MNDR	24440503//22000014	0.9786
RAID01374920	hsa-miR-24-3p	miRNA	MIMAT0000080	Homo sapiens	LINC00632	lncRNA	286411	Homo sapiens	CLIP-seq	miRTarBase	23824327	0.5483
RAID01375071	hsa-miR-210-3p	miRNA	MIMAT0000267	Homo sapiens	XIST	lncRNA	7503	Homo sapiens	IP (immunoprecipitation)//Reporter Assay//RT-PCR//Microarray	miRTarBase	19826008	0.9786
RAID01376843	hsa-miR-3916	miRNA	MIMAT0018190	Homo sapiens	XIST	lncRNA	7503	Homo sapiens	CLIP	NPInter	23846593	0.5483
RAID01378720	hsa-miR-5196-3p	miRNA	MIMAT0021129	Homo sapiens	OIP5-AS1	lncRNA	729082	Homo sapiens	CLIP	NPInter	23846593	0.5483
RAID01379274	hsa-miR-6506-5p	miRNA	MIMAT0025468	Homo sapiens	LINC00598	lncRNA	646982	Homo sapiens	CLIP-seq	miRTarBase	23313552	0.5483
RAID01382626	hsa-miR-106a-5p	miRNA	MIMAT0000103	Homo sapiens	LINC00473	lncRNA	90632	Homo sapiens	CLIP	NPInter	25531890	0.5483
RAID01384017	hsa-miR-15a-3p	miRNA	MIMAT0004488	Homo sapiens	MALAT1	lncRNA	378938	Homo sapiens	CLIP	NPInter	23846593	0.5483
RAID01384395	hsa-miR-378a-3p	miRNA	MIMAT0000732	Homo sapiens	DANCR	lncRNA	57291	Homo sapiens	CLIP-seq//Prediction	starBase//miRanda	None	0.6308
RAID01385666	hsa-miR-185-5p	miRNA	MIMAT0000455	Homo sapiens	SND1-IT1	lncRNA	27099	Homo sapiens	CLIP-seq//Prediction	starBase//miRanda	None	0.6308
RAID01390577	hsa-miR-5095	miRNA	MIMAT0020600	Homo sapiens	BCYRN1	lncRNA	618	Homo sapiens	CLIP	NPInter	23846593	0.5483
RAID01391319	hsa-miR-1278	miRNA	MIMAT0005936	Homo sapiens	XIST	lncRNA	7503	Homo sapiens	CLIP	NPInter	23846593	0.5483
RAID01393494	hsa-miR-4736	miRNA	MIMAT0019862	Homo sapiens	DLEU1	lncRNA	10301	Homo sapiens	CLIP-seq	miRTarBase	19536157	0.5483
RAID01396355	hsa-miR-4668-5p	miRNA	MIMAT0019745	Homo sapiens	MALAT1	lncRNA	378938	Homo sapiens	CLIP	NPInter	23846593	0.5483
RAID01398154	hsa-miR-660-3p	miRNA	MIMAT0022711	Homo sapiens	OIP5-AS1	lncRNA	729082	Homo sapiens	CLIP	NPInter	23846593	0.5483
RAID01398344	hsa-miR-106a-5p	miRNA	MIMAT0000103	Homo sapiens	FGD5-AS1	lncRNA	100505641	Homo sapiens	CLIP	NPInter	25531890	0.5483
RAID01398972	hsa-miR-4684-5p	miRNA	MIMAT0019769	Homo sapiens	OIP5-AS1	lncRNA	729082	Homo sapiens	CLIP	NPInter	23846593	0.5483
RAID01399828	hsa-miR-3591-5p	miRNA	MIMAT0019876	Homo sapiens	LINC00598	lncRNA	646982	Homo sapiens	PAR-CLIP	miRTarBase	20371350	0.5483
RAID01402015	hsa-miR-375	miRNA	MIMAT0000728	Homo sapiens	SUZ12P1	lncRNA	440423	Homo sapiens	CLIP-seq//Prediction	starBase//miRanda	None	0.6308
RAID01402341	hsa-miR-382-5p	miRNA	MIMAT0000737	Homo sapiens	TUG1	lncRNA	55000	Homo sapiens	CLIP-seq//Prediction	starBase//miRanda	None	0.6308
RAID01402402	hsa-miR-106a-5p	miRNA	MIMAT0000103	Homo sapiens	KLF7-IT1	lncRNA	100874272	Homo sapiens	CLIP	NPInter	25531890	0.5483
RAID01404792	hsa-miR-106a-5p	miRNA	MIMAT0000103	Homo sapiens	JPX	lncRNA	554203	Homo sapiens	CLIP	NPInter	25531890	0.5483
RAID01406178	hsa-miR-4476	miRNA	MIMAT0019003	Homo sapiens	LINC00598	lncRNA	646982	Homo sapiens	PAR-CLIP	miRTarBase	23592263	0.5483
RAID01406382	hsa-miR-511-5p	miRNA	MIMAT0002808	Homo sapiens	HOXA10-AS	lncRNA	100874323	Homo sapiens	CLIP	NPInter	23846593	0.5483
RAID01409900	hsa-let-7e-5p	miRNA	MIMAT0000066	Homo sapiens	OLMALINC	lncRNA	90271	Homo sapiens	CLIP-seq//Prediction	starBase//miRanda	None	0.6308
RAID01409968	hsa-miR-421	miRNA	MIMAT0003339	Homo sapiens	WHAMMP2	lncRNA	440253	Homo sapiens	CLIP-seq//Prediction	starBase//miRanda	None	0.6308
RAID01412697	hsa-miR-26a-2-3p	miRNA	MIMAT0004681	Homo sapiens	BCYRN1	lncRNA	618	Homo sapiens	CLIP	NPInter	23846593	0.5483
RAID01413844	hsa-miR-23a-3p	miRNA	MIMAT0000078	Homo sapiens	URB1-AS1	lncRNA	84996	Homo sapiens	CLIP-seq	starBase	None	0.5483
RAID01415761	hsa-miR-4722-5p	miRNA	MIMAT0019836	Homo sapiens	LINC00598	lncRNA	646982	Homo sapiens	CLIP-seq	miRTarBase	23824327	0.5483
RAID01415953	hsa-miR-29a-3p	miRNA	MIMAT0000086	Homo sapiens	CIDECP	lncRNA	152302	Homo sapiens	CLIP-seq	starBase	None	0.5483
RAID01417298	hsa-miR-106a-5p	miRNA	MIMAT0000103	Homo sapiens	CBR3-AS1	lncRNA	100506428	Homo sapiens	CLIP	NPInter	25531890	0.5483
RAID01417705	hsa-miR-381-3p	miRNA	MIMAT0000736	Homo sapiens	TUG1	lncRNA	55000	Homo sapiens	CLIP-seq//Prediction	starBase//miRanda	None	0.6308
RAID01417816	hsa-miR-433-3p	miRNA	MIMAT0001627	Homo sapiens	XIST	lncRNA	7503	Homo sapiens	CLIP	NPInter	23846593	0.5483
RAID01419751	hsa-miR-17-5p	miRNA	MIMAT0000070	Homo sapiens	WHAMMP2	lncRNA	440253	Homo sapiens	CLIP-seq//Prediction	starBase//miRanda	None	0.6308
RAID01420115	hsa-miR-32-3p	miRNA	MIMAT0004505	Homo sapiens	LINC00346	lncRNA	283487	Homo sapiens	PAR-CLIP	miRTarBase	20371350	0.5483
RAID01421057	hsa-miR-450a-1-3p	miRNA	MIMAT0022700	Homo sapiens	BCYRN1	lncRNA	618	Homo sapiens	CLIP	NPInter	23846593	0.5483
RAID01423491	hsa-miR-338-3p	miRNA	MIMAT0000763	Homo sapiens	LINC00339	lncRNA	29092	Homo sapiens	CLIP-seq//Prediction	starBase//miRanda	None	0.6308
RAID01426090	hsa-miR-4290	miRNA	MIMAT0016921	Homo sapiens	BCYRN1	lncRNA	618	Homo sapiens	CLIP	NPInter	23846593	0.5483
RAID01430206	hsa-miR-9-5p	miRNA	MIMAT0000441	Homo sapiens	LINC00483	lncRNA	55018	Homo sapiens	Microarray	miRTarBase	17612493	0.5483
RAID01430913	hsa-miR-212-5p	miRNA	MIMAT0022695	Homo sapiens	BCYRN1	lncRNA	618	Homo sapiens	CLIP	NPInter	23846593	0.5483
RAID01431189	hsa-miR-335-5p	miRNA	MIMAT0000765	Homo sapiens	CECR5-AS1	lncRNA	100130717	Homo sapiens	Microarray	miRTarBase	18185580	0.5483
RAID01432328	mmu-miR-340-5p	miRNA	MIMAT0004651	Mus musculus	AI504432	lncRNA	229694	Mus musculus	CLIP-seq//Prediction	starBase//miRanda	None	0.6308
RAID01433206	hsa-miR-217	miRNA	MIMAT0000274	Homo sapiens	DLEU1	lncRNA	10301	Homo sapiens	CLIP-seq//Prediction	starBase//miRanda	None	0.6308
RAID01433446	hsa-miR-491-5p	miRNA	MIMAT0002807	Homo sapiens	A1BG-AS1	lncRNA	503538	Homo sapiens	CLIP-seq//Prediction	starBase//miRanda	None	0.6308
RAID01437691	hsa-miR-513a-5p	miRNA	MIMAT0002877	Homo sapiens	BDNF-AS	lncRNA	497258	Homo sapiens	PAR-CLIP	miRTarBase	23592263	0.5483
RAID01438443	hsa-miR-542-3p	miRNA	MIMAT0003389	Homo sapiens	LINC01547	lncRNA	84536	Homo sapiens	CLIP-seq//Prediction	starBase//miRanda	None	0.6308
RAID01439103	hsa-miR-106a-5p	miRNA	MIMAT0000103	Homo sapiens	LINC00612	lncRNA	253128	Homo sapiens	CLIP	NPInter	25531890	0.5483
RAID01439631	hsa-miR-1234-3p	miRNA	MIMAT0005589	Homo sapiens	WT1-AS	lncRNA	51352	Homo sapiens	CLIP	NPInter	23846593	0.5483
RAID01440267	hsa-miR-377-5p	miRNA	MIMAT0004689	Homo sapiens	GAS5	lncRNA	60674	Homo sapiens	CLIP	NPInter	23846593	0.5483
RAID01442458	hsa-miR-374b-5p	miRNA	MIMAT0004955	Homo sapiens	LOC730101	lncRNA	730101	Homo sapiens	CLIP-seq//Prediction	starBase//miRanda	None	0.6308
RAID01443155	hsa-miR-6827-5p	miRNA	MIMAT0027554	Homo sapiens	LINC00346	lncRNA	283487	Homo sapiens	CLIP-seq	miRTarBase	23824327	0.5483
RAID01447372	hsa-miR-1295b-5p	miRNA	MIMAT0022293	Homo sapiens	SNHG3	lncRNA	8420	Homo sapiens	CLIP	NPInter	23846593	0.5483
RAID01449531	hsa-miR-191-5p	miRNA	MIMAT0000440	Homo sapiens	ZNF833P	lncRNA	401898	Homo sapiens	CLIP-seq//Prediction	starBase//miRanda	None	0.6308
RAID01453969	hsa-miR-4505	miRNA	MIMAT0019041	Homo sapiens	LINC00346	lncRNA	283487	Homo sapiens	CLIP-seq	miRTarBase	23824327	0.5483
RAID01454068	hsa-miR-299-3p	miRNA	MIMAT0000687	Homo sapiens	BCYRN1	lncRNA	618	Homo sapiens	CLIP	NPInter	23846593	0.5483
RAID01455572	hsa-miR-155-5p	miRNA	MIMAT0000646	Homo sapiens	LOC93622	lncRNA	93622	Homo sapiens	CLIP-seq//Prediction	starBase//miRanda	None	0.6308
RAID01458997	hsa-miR-513a-3p	miRNA	MIMAT0004777	Homo sapiens	MALAT1	lncRNA	378938	Homo sapiens	CLIP	NPInter	23846593	0.5483
RAID01461089	hsa-miR-106a-5p	miRNA	MIMAT0000103	Homo sapiens	TSSC1-IT1	lncRNA	100874301	Homo sapiens	CLIP	NPInter	25531890	0.5483
RAID01463675	mmu-let-7f-5p	miRNA	MIMAT0000525	Mus musculus	Rab10os	lncRNA	74173	Mus musculus	CLIP-seq	starBase	None	0.5483
RAID01463986	hsa-miR-217	miRNA	MIMAT0000274	Homo sapiens	LRRC75A-AS1	lncRNA	125144	Homo sapiens	CLIP-seq//Prediction	starBase//miRanda	None	0.6308
RAID01468839	hsa-miR-182-5p	miRNA	MIMAT0000259	Homo sapiens	LINC00173	lncRNA	100287569	Homo sapiens	CLIP-seq//Prediction	starBase//miRanda	None	0.6308
RAID01471844	hsa-miR-3622a-3p	miRNA	MIMAT0018004	Homo sapiens	LINC00598	lncRNA	646982	Homo sapiens	CLIP-seq	miRTarBase	23824327	0.5483
RAID01472904	mmu-miR-204-5p	miRNA	MIMAT0000237	Mus musculus	D030047H15Rik	lncRNA	100037396	Mus musculus	CLIP-seq	starBase	None	0.5483
RAID01473968	hsa-miR-9-5p	miRNA	MIMAT0000441	Homo sapiens	SNHG7	lncRNA	84973	Homo sapiens	CLIP-seq	starBase	None	0.5483
RAID01475358	hsa-miR-1297	miRNA	MIMAT0005886	Homo sapiens	HCG11	lncRNA	493812	Homo sapiens	CLIP-seq//Prediction	starBase//miRanda	None	0.6308
RAID01477726	hsa-miR-26b-5p	miRNA	MIMAT0000083	Homo sapiens	CTBP1-AS2	lncRNA	92070	Homo sapiens	CLIP-seq//Prediction	starBase//miRanda	None	0.6308
RAID01479806	hsa-miR-4668-5p	miRNA	MIMAT0019745	Homo sapiens	WT1-AS	lncRNA	51352	Homo sapiens	CLIP	NPInter	23846593	0.5483
RAID01481075	hsa-miR-9-5p	miRNA	MIMAT0000441	Homo sapiens	ZNF252P-AS1	lncRNA	286103	Homo sapiens	CLIP-seq//Prediction	starBase//miRanda	None	0.6308
RAID01482304	hsa-miR-6744-5p	miRNA	MIMAT0027389	Homo sapiens	LINC00598	lncRNA	646982	Homo sapiens	CLIP-seq	miRTarBase	23313552	0.5483
RAID01484554	hsa-let-7e-5p	miRNA	MIMAT0000066	Homo sapiens	TINCR	lncRNA	257000	Homo sapiens	CLIP-seq	starBase	None	0.5483
RAID01486449	hsa-miR-3613-3p	miRNA	MIMAT0017991	Homo sapiens	BCYRN1	lncRNA	618	Homo sapiens	CLIP	NPInter	23846593	0.5483
RAID01488597	hsa-miR-338-3p	miRNA	MIMAT0000763	Homo sapiens	EPB41L4A-AS1	lncRNA	114915	Homo sapiens	CLIP-seq	starBase	None	0.5483
RAID01488861	hsa-miR-5011-3p	miRNA	MIMAT0021046	Homo sapiens	XIST	lncRNA	7503	Homo sapiens	CLIP	NPInter	23846593	0.5483
RAID01489084	hsa-miR-4461	miRNA	MIMAT0018983	Homo sapiens	HNRNPU	lncRNA	3192	Homo sapiens	CLIP	NPInter	23846593	0.5483
RAID01489821	hsa-miR-4769-3p	miRNA	MIMAT0019923	Homo sapiens	BCYRN1	lncRNA	618	Homo sapiens	CLIP	NPInter	23846593	0.5483
RAID01494133	hsa-miR-491-5p	miRNA	MIMAT0002807	Homo sapiens	FAM13A-AS1	lncRNA	285512	Homo sapiens	CLIP-seq	starBase	None	0.5483
RAID01494165	hsa-miR-30c-5p	miRNA	MIMAT0000244	Homo sapiens	MALAT1	lncRNA	378938	Homo sapiens	CLIP	NPInter	23846593	0.5483
RAID01494736	hsa-miR-3120-3p	miRNA	MIMAT0014982	Homo sapiens	OIP5-AS1	lncRNA	729082	Homo sapiens	CLIP	NPInter	23846593	0.5483
RAID01497282	hsa-miR-1245a	miRNA	MIMAT0005897	Homo sapiens	XIST	lncRNA	7503	Homo sapiens	CLIP	NPInter	23846593	0.5483
RAID01498502	hsa-miR-887-5p	miRNA	MIMAT0026720	Homo sapiens	LINC00346	lncRNA	283487	Homo sapiens	CLIP-seq	miRTarBase	23824327	0.5483
RAID01501861	hsa-miR-17-5p	miRNA	MIMAT0000070	Homo sapiens	LINC00472	lncRNA	79940	Homo sapiens	CLIP-seq	starBase	None	0.5483
RAID01502734	hsa-miR-3160-3p	miRNA	MIMAT0015034	Homo sapiens	LINC00346	lncRNA	283487	Homo sapiens	CLIP-seq	miRTarBase	23824327	0.5483
RAID01502758	hsa-miR-548c-3p	miRNA	MIMAT0003285	Homo sapiens	WT1-AS	lncRNA	51352	Homo sapiens	CLIP	NPInter	23846593	0.5483
RAID01503748	hsa-miR-17-5p	miRNA	MIMAT0000070	Homo sapiens	BCYRN1	lncRNA	618	Homo sapiens	CLIP	NPInter	23846593	0.5483
RAID01505694	hsa-miR-205-5p	miRNA	MIMAT0000266	Homo sapiens	MCM3AP-AS1	lncRNA	114044	Homo sapiens	CLIP-seq//Prediction	starBase//miRanda	None	0.6308
RAID01505750	hsa-miR-155-5p	miRNA	MIMAT0000646	Homo sapiens	CTBP1-AS2	lncRNA	92070	Homo sapiens	CLIP-seq//Prediction	starBase//miRanda	None	0.6308
RAID01506954	hsa-miR-98-5p	miRNA	MIMAT0000096	Homo sapiens	OLMALINC	lncRNA	90271	Homo sapiens	CLIP-seq//Prediction	starBase//miRanda	None	0.6308
RAID01507592	hsa-miR-302a-3p	miRNA	MIMAT0000684	Homo sapiens	MIR17HG	lncRNA	407975	Homo sapiens	CLIP-seq//Prediction	starBase//miRanda	None	0.6308
RAID01508310	hsa-miR-6807-5p	miRNA	MIMAT0027514	Homo sapiens	LINC00598	lncRNA	646982	Homo sapiens	PAR-CLIP	miRTarBase	22100165	0.5483
RAID01511059	hsa-miR-1277-5p	miRNA	MIMAT0022724	Homo sapiens	BCYRN1	lncRNA	618	Homo sapiens	CLIP	NPInter	23846593	0.5483
RAID01515919	hsa-miR-139-5p	miRNA	MIMAT0000250	Homo sapiens	FAM201A	lncRNA	158228	Homo sapiens	CLIP-seq//Prediction	starBase//miRanda	None	0.6308
RAID01516033	hsa-miR-6510-5p	miRNA	MIMAT0025476	Homo sapiens	OIP5-AS1	lncRNA	729082	Homo sapiens	CLIP	NPInter	23846593	0.5483
RAID01516266	hsa-miR-19b-3p	miRNA	MIMAT0000074	Homo sapiens	MCM3AP-AS1	lncRNA	114044	Homo sapiens	CLIP-seq//Prediction	miRTarBase//starBase//miRanda	22473208	0.6308
RAID01516857	hsa-miR-300	miRNA	MIMAT0004903	Homo sapiens	LOC93622	lncRNA	93622	Homo sapiens	CLIP-seq//Prediction	starBase//miRanda	None	0.6308
RAID01517323	hsa-miR-513a-3p	miRNA	MIMAT0004777	Homo sapiens	LOH12CR2	lncRNA	503693	Homo sapiens	PAR-CLIP	miRTarBase	22291592//22100165	0.5483
RAID01517578	hsa-miR-548am-5p	miRNA	MIMAT0022740	Homo sapiens	MALAT1	lncRNA	378938	Homo sapiens	CLIP	NPInter	23846593	0.5483
RAID01518610	hsa-miR-335-5p	miRNA	MIMAT0000765	Homo sapiens	FAM167A-AS1	lncRNA	83656	Homo sapiens	Microarray	miRTarBase	18185580	0.5483
RAID01519215	hsa-miR-4728-5p	miRNA	MIMAT0019849	Homo sapiens	MALAT1	lncRNA	378938	Homo sapiens	CLIP	NPInter	23846593	0.5483
RAID01520253	hsa-miR-15b-5p	miRNA	MIMAT0000417	Homo sapiens	LINC00339	lncRNA	29092	Homo sapiens	CLIP-seq//Prediction	starBase//miRanda	None	0.6308
RAID01524974	hsa-miR-196a-5p	miRNA	MIMAT0000226	Homo sapiens	XIST	lncRNA	7503	Homo sapiens	CLIP	NPInter	23846593	0.5483
RAID01530426	hsa-miR-335-5p	miRNA	MIMAT0000765	Homo sapiens	LINC00862	lncRNA	554279	Homo sapiens	Microarray	miRTarBase	18185580	0.5483
RAID01530600	hsa-miR-1233-5p	miRNA	MIMAT0022943	Homo sapiens	BCYRN1	lncRNA	618	Homo sapiens	CLIP	NPInter	23846593	0.5483
RAID01531568	hsa-miR-1268a	miRNA	MIMAT0005922	Homo sapiens	OIP5-AS1	lncRNA	729082	Homo sapiens	CLIP	NPInter	23846593	0.5483
RAID01532426	hsa-miR-517c-3p	miRNA	MIMAT0002866	Homo sapiens	IDI2-AS1	lncRNA	55853	Homo sapiens	CLIP-seq	starBase	None	0.5483
RAID01534864	hsa-miR-3675-3p	miRNA	MIMAT0018099	Homo sapiens	XIST	lncRNA	7503	Homo sapiens	CLIP	NPInter	23846593	0.5483
RAID01535106	hsa-miR-106a-5p	miRNA	MIMAT0000103	Homo sapiens	SNHG14	lncRNA	104472715	Homo sapiens	CLIP	NPInter	25531890	0.5483
RAID01535265	hsa-miR-203a-3p	miRNA	MIMAT0000264	Homo sapiens	LOC730101	lncRNA	730101	Homo sapiens	CLIP-seq//Prediction	starBase//miRanda	None	0.6308
RAID01535334	hsa-miR-106a-5p	miRNA	MIMAT0000103	Homo sapiens	SNHG1	lncRNA	23642	Homo sapiens	CLIP	NPInter	25531890	0.5483
RAID01535875	hsa-miR-1271-5p	miRNA	MIMAT0005796	Homo sapiens	LINC00173	lncRNA	100287569	Homo sapiens	CLIP-seq//Prediction	starBase//miRanda	None	0.6308
RAID01537385	hsa-miR-2054	miRNA	MIMAT0009979	Homo sapiens	BCYRN1	lncRNA	618	Homo sapiens	CLIP	NPInter	23846593	0.5483
RAID01539120	hsa-miR-106a-5p	miRNA	MIMAT0000103	Homo sapiens	MIR137HG	lncRNA	400765	Homo sapiens	CLIP	NPInter	25531890	0.5483
RAID01539267	hsa-miR-106a-5p	miRNA	MIMAT0000103	Homo sapiens	MAGI2-AS3	lncRNA	100505881	Homo sapiens	CLIP	NPInter	25531890	0.5483
RAID01540154	hsa-miR-302b-3p	miRNA	MIMAT0000715	Homo sapiens	LINC00598	lncRNA	646982	Homo sapiens	CLIP-seq	miRTarBase	23313552	0.5483
RAID01540797	ebv-miR-BART21-3p	miRNA	MIMAT0010131	Human herpesvirus 4	PTENP1	lncRNA	11191	Homo sapiens	PAR-CLIP	ViRBase	22100165	0.5483
RAID01541086	hsa-miR-3180	miRNA	MIMAT0018178	Homo sapiens	BCYRN1	lncRNA	618	Homo sapiens	CLIP	NPInter	23846593	0.5483
RAID01543430	hsa-miR-7-5p	miRNA	MIMAT0000252	Homo sapiens	OIP5-AS1	lncRNA	729082	Homo sapiens	CLIP//Prediction	NPInter//miRanda	23846593	0.6308
RAID01548105	hsa-miR-3065-5p	miRNA	MIMAT0015066	Homo sapiens	XIST	lncRNA	7503	Homo sapiens	CLIP	NPInter	23846593	0.5483
RAID01548724	hsa-miR-106b-5p	miRNA	MIMAT0000680	Homo sapiens	SNHG20	lncRNA	654434	Homo sapiens	CLIP-seq//Prediction	starBase//miRanda	None	0.6308
RAID01551240	hsa-let-7i-5p	miRNA	MIMAT0000415	Homo sapiens	CTBP1-AS2	lncRNA	92070	Homo sapiens	CLIP-seq	starBase	None	0.5483
RAID01551495	hsa-miR-548y	miRNA	MIMAT0018354	Homo sapiens	XIST	lncRNA	7503	Homo sapiens	CLIP	NPInter	23846593	0.5483
RAID01552011	hsa-miR-193b-3p	miRNA	MIMAT0002819	Homo sapiens	DLEU2	lncRNA	8847	Homo sapiens	Microarray	miRTarBase	20304954	0.5483
RAID01552576	hsa-miR-106a-5p	miRNA	MIMAT0000103	Homo sapiens	LL0XNC01-250H12.3	lncRNA	100506901	Homo sapiens	CLIP	NPInter	25531890	0.5483
RAID01552793	hsa-miR-206	miRNA	MIMAT0000462	Homo sapiens	MALAT1	lncRNA	378938	Homo sapiens	CLIP-seq//Prediction	starBase//miRanda	None	0.6308
RAID01555130	hsa-miR-200b-3p	miRNA	MIMAT0000318	Homo sapiens	CRHR1-IT1	lncRNA	147081	Homo sapiens	CLIP-seq//Prediction	starBase//miRanda	None	0.6308
RAID01556187	hsa-miR-519d-3p	miRNA	MIMAT0002853	Homo sapiens	XIST	lncRNA	7503	Homo sapiens	CLIP	NPInter	23846593	0.5483
RAID01558208	hsa-miR-548h-3p	miRNA	MIMAT0022723	Homo sapiens	MIR155HG	lncRNA	114614	Homo sapiens	CLIP	NPInter	23846593	0.5483
RAID01559797	hsa-miR-587	miRNA	MIMAT0003253	Homo sapiens	HNRNPU	lncRNA	3192	Homo sapiens	CLIP	NPInter	23846593	0.5483
RAID01559977	hsa-miR-3960	miRNA	MIMAT0019337	Homo sapiens	HOXA10-AS	lncRNA	100874323	Homo sapiens	CLIP	NPInter	23846593	0.5483
RAID01560554	hsa-miR-185-5p	miRNA	MIMAT0000455	Homo sapiens	MGC12916	lncRNA	84815	Homo sapiens	CLIP-seq//Prediction	starBase//miRanda	None	0.6308
RAID01561823	hsa-miR-340-5p	miRNA	MIMAT0004692	Homo sapiens	MORC2-AS1	lncRNA	150291	Homo sapiens	CLIP-seq//Prediction	starBase//miRanda	None	0.6308
RAID01564818	hsa-miR-3120-3p	miRNA	MIMAT0014982	Homo sapiens	XIST	lncRNA	7503	Homo sapiens	CLIP	NPInter	23846593	0.5483
RAID01565543	hsa-miR-448	miRNA	MIMAT0001532	Homo sapiens	HNRNPU	lncRNA	3192	Homo sapiens	CLIP	NPInter	23846593	0.5483
RAID01566048	hsa-miR-497-5p	miRNA	MIMAT0002820	Homo sapiens	MALAT1	lncRNA	378938	Homo sapiens	CLIP	NPInter	23846593	0.5483
RAID01567477	hsa-miR-325	miRNA	MIMAT0000771	Homo sapiens	TP73-AS1	lncRNA	57212	Homo sapiens	CLIP-seq	starBase	None	0.5483
RAID01567665	hsa-miR-106a-5p	miRNA	MIMAT0000103	Homo sapiens	PCBP1-AS1	lncRNA	400960	Homo sapiens	CLIP	NPInter	25531890	0.5483
RAID01567881	hsa-miR-98-5p	miRNA	MIMAT0000096	Homo sapiens	KRASP1	lncRNA	3844	Homo sapiens	Reporter Assay//RT-PCR	RAID	20577206	0.8808
RAID01568537	hsa-miR-512-5p	miRNA	MIMAT0002822	Homo sapiens	MALAT1	lncRNA	378938	Homo sapiens	CLIP	NPInter	23846593	0.5483
RAID01569123	hsa-miR-204-5p	miRNA	MIMAT0000265	Homo sapiens	LINC00472	lncRNA	79940	Homo sapiens	CLIP-seq	starBase	None	0.5483
RAID01571290	hsa-miR-150-5p	miRNA	MIMAT0000451	Homo sapiens	DLEU1	lncRNA	10301	Homo sapiens	CLIP-seq	miRTarBase	19536157	0.5483
RAID01571398	hsa-miR-4716-3p	miRNA	MIMAT0019827	Homo sapiens	BDNF-AS	lncRNA	497258	Homo sapiens	PAR-CLIP	miRTarBase	23592263	0.5483
RAID01573027	hsa-miR-3190-3p	miRNA	MIMAT0022839	Homo sapiens	LINC00461	lncRNA	645323	Homo sapiens	CLIP	NPInter	23846593	0.5483
RAID01576391	hsa-miR-6726-5p	miRNA	MIMAT0027353	Homo sapiens	LINC00346	lncRNA	283487	Homo sapiens	CLIP-seq	miRTarBase	23824327	0.5483
RAID01576561	hsa-miR-452-5p	miRNA	MIMAT0001635	Homo sapiens	XIST	lncRNA	7503	Homo sapiens	CLIP	NPInter	23846593	0.5483
RAID01582196	hsa-miR-4498	miRNA	MIMAT0019033	Homo sapiens	XIST	lncRNA	7503	Homo sapiens	CLIP	NPInter	23846593	0.5483
RAID01584575	hsa-miR-4731-5p	miRNA	MIMAT0019853	Homo sapiens	MIR22HG	lncRNA	84981	Homo sapiens	CLIP	NPInter	23846593	0.5483
RAID01585758	hsa-miR-548au-5p	miRNA	MIMAT0022291	Homo sapiens	MALAT1	lncRNA	378938	Homo sapiens	CLIP	NPInter	23846593	0.5483
RAID01586331	hsa-miR-23a-3p	miRNA	MIMAT0000078	Homo sapiens	CRHR1-IT1	lncRNA	147081	Homo sapiens	CLIP-seq//Prediction	starBase//miRanda	None	0.6308
RAID01586968	hsa-miR-216b-5p	miRNA	MIMAT0004959	Homo sapiens	DANCR	lncRNA	57291	Homo sapiens	CLIP-seq//Prediction	starBase//miRanda	None	0.6308
RAID01588095	hsa-miR-214-3p	miRNA	MIMAT0000271	Homo sapiens	PTENP1	lncRNA	11191	Homo sapiens	Reporter Assay//RT-PCR//Western Blot	RAID	20577206	0.9526
RAID01588417	hsa-miR-19a-3p	miRNA	MIMAT0000073	Homo sapiens	LOC90246	lncRNA	90246	Homo sapiens	CLIP-seq//Prediction	starBase//miRanda	None	0.6308
RAID01589422	hsa-miR-6808-5p	miRNA	MIMAT0027516	Homo sapiens	DLEU1	lncRNA	10301	Homo sapiens	CLIP-seq	miRTarBase	19536157	0.5483
RAID01590324	hsa-miR-519d-3p	miRNA	MIMAT0002853	Homo sapiens	LINC00598	lncRNA	646982	Homo sapiens	CLIP-seq	miRTarBase	23313552	0.5483
RAID01590748	hsa-miR-20b-5p	miRNA	MIMAT0001413	Homo sapiens	XIST	lncRNA	7503	Homo sapiens	CLIP	NPInter	23846593	0.5483
RAID01591601	hsa-miR-186-5p	miRNA	MIMAT0000456	Homo sapiens	LOC100132077	lncRNA	100132077	Homo sapiens	CLIP-seq//Prediction	starBase//miRanda	None	0.6308
RAID01596799	hsa-miR-8084	miRNA	MIMAT0031011	Homo sapiens	LINC00598	lncRNA	646982	Homo sapiens	PAR-CLIP	miRTarBase	20371350//21572407	0.5483
RAID01597111	hsa-miR-4707-5p	miRNA	MIMAT0019807	Homo sapiens	LOC100129973	lncRNA	100129973	Homo sapiens	RT-PCR//RIP-ChIP	RAID	26887505	0.8785
RAID01601771	hsa-miR-5004-3p	miRNA	MIMAT0021028	Homo sapiens	BCYRN1	lncRNA	618	Homo sapiens	CLIP	NPInter	23846593	0.5483
RAID01602165	mmu-miR-221-3p	miRNA	MIMAT0000669	Mus musculus	AI504432	lncRNA	229694	Mus musculus	CLIP-seq//Prediction	starBase//miRanda	None	0.6308
RAID01605731	hsa-miR-3175	miRNA	MIMAT0015052	Homo sapiens	GAS5	lncRNA	60674	Homo sapiens	CLIP	NPInter	23846593	0.5483
RAID01606799	hsa-miR-30e-3p	miRNA	MIMAT0000693	Homo sapiens	SNHG1	lncRNA	23642	Homo sapiens	CLIP	NPInter	23846593	0.5483
RAID01607246	hsa-miR-16-5p	miRNA	MIMAT0000069	Homo sapiens	SNHG1	lncRNA	23642	Homo sapiens	CLIP	NPInter	23846593	0.5483
RAID01607586	hsa-miR-6090	miRNA	MIMAT0023715	Homo sapiens	LINC00346	lncRNA	283487	Homo sapiens	CLIP-seq	miRTarBase	23824327	0.5483
RAID01608839	hsa-miR-1226-5p	miRNA	MIMAT0005576	Homo sapiens	SNHG3	lncRNA	8420	Homo sapiens	CLIP	NPInter	23846593	0.5483
RAID01610378	mmu-miR-27a-3p	miRNA	MIMAT0000537	Mus musculus	AI504432	lncRNA	229694	Mus musculus	CLIP-seq//Prediction	starBase//miRanda	None	0.6308
RAID01610898	hsa-miR-373-5p	miRNA	MIMAT0000725	Homo sapiens	XIST	lncRNA	7503	Homo sapiens	CLIP	NPInter	23846593	0.5483
RAID01613022	hsa-miR-106a-5p	miRNA	MIMAT0000103	Homo sapiens	HCG17	lncRNA	414778	Homo sapiens	CLIP	NPInter	25531890	0.5483
RAID01615646	hsa-miR-15b-5p	miRNA	MIMAT0000417	Homo sapiens	EPB41L4A-AS1	lncRNA	114915	Homo sapiens	CLIP-seq//Prediction	starBase//miRanda	None	0.6308
RAID01620185	hsa-miR-33b-3p	miRNA	MIMAT0004811	Homo sapiens	LINC00324	lncRNA	284029	Homo sapiens	CLIP	NPInter	23846593	0.5483
RAID01622168	hsa-miR-150-5p	miRNA	MIMAT0000451	Homo sapiens	LINC00869	lncRNA	57234	Homo sapiens	CLIP-seq//Prediction	starBase//miRanda	None	0.6308
RAID01623407	hsa-miR-384	miRNA	MIMAT0001075	Homo sapiens	TUG1	lncRNA	55000	Homo sapiens	CLIP-seq//Prediction	starBase//miRanda	None	0.6308
RAID01623747	hsa-miR-4446-5p	miRNA	MIMAT0019233	Homo sapiens	HNRNPU	lncRNA	3192	Homo sapiens	CLIP	NPInter	23846593	0.5483
RAID01624400	hsa-miR-23a-5p	miRNA	MIMAT0004496	Homo sapiens	LINC00632	lncRNA	286411	Homo sapiens	CLIP-seq	miRTarBase	23824327	0.5483
RAID01624499	hsa-let-7e-5p	miRNA	MIMAT0000066	Homo sapiens	FLJ22447	lncRNA	400221	Homo sapiens	CLIP-seq//Prediction	starBase//miRanda	None	0.6308
RAID01624938	hsa-miR-767-5p	miRNA	MIMAT0003882	Homo sapiens	OIP5-AS1	lncRNA	729082	Homo sapiens	CLIP	NPInter	23846593	0.5483
RAID01625394	hsa-miR-17-5p	miRNA	MIMAT0000070	Homo sapiens	OIP5-AS1	lncRNA	729082	Homo sapiens	CLIP//Prediction	NPInter//miRanda	23846593	0.6308
RAID01625437	hsa-miR-145-5p	miRNA	MIMAT0000437	Homo sapiens	POU5F1B	lncRNA	5462	Homo sapiens	Reporter Assay//RT-PCR	RAID	20577206	0.8808
RAID01626322	hsa-miR-449b-5p	miRNA	MIMAT0003327	Homo sapiens	LOC645166	lncRNA	645166	Homo sapiens	CLIP-seq//Prediction	starBase//miRanda	None	0.6308
RAID01626669	hsa-miR-574-3p	miRNA	MIMAT0003239	Homo sapiens	LINC00324	lncRNA	284029	Homo sapiens	CLIP	NPInter	23846593	0.5483
RAID01628784	hsa-miR-199a-5p	miRNA	MIMAT0000231	Homo sapiens	ST7-OT3	lncRNA	93655	Homo sapiens	CLIP-seq//Prediction	starBase//miRanda	None	0.6308
RAID01629189	hsa-miR-4287	miRNA	MIMAT0016917	Homo sapiens	LINC00598	lncRNA	646982	Homo sapiens	CLIP-seq	miRTarBase	23824327	0.5483
RAID01629460	hsa-miR-4728-5p	miRNA	MIMAT0019849	Homo sapiens	LINC00598	lncRNA	646982	Homo sapiens	CLIP-seq	miRTarBase	23824327	0.5483
RAID01631630	hsa-miR-4714-3p	miRNA	MIMAT0019823	Homo sapiens	OIP5-AS1	lncRNA	729082	Homo sapiens	CLIP	NPInter	23846593	0.5483
RAID01631951	hsa-miR-9-5p	miRNA	MIMAT0000441	Homo sapiens	TP73-AS1	lncRNA	57212	Homo sapiens	CLIP-seq	starBase	None	0.5483
RAID01632204	hsa-miR-361-5p	miRNA	MIMAT0000703	Homo sapiens	LINC01465	lncRNA	283416	Homo sapiens	CLIP-seq//Prediction	starBase//miRanda	None	0.6308
RAID01635030	hsa-miR-506-3p	miRNA	MIMAT0002878	Homo sapiens	SND1-IT1	lncRNA	27099	Homo sapiens	CLIP-seq//Prediction	starBase//miRanda	None	0.6308
RAID01635805	hsa-miR-767-5p	miRNA	MIMAT0003882	Homo sapiens	LINC00461	lncRNA	645323	Homo sapiens	CLIP	NPInter	23846593	0.5483
RAID01639396	hsa-miR-106a-5p	miRNA	MIMAT0000103	Homo sapiens	LINC00467	lncRNA	84791	Homo sapiens	CLIP	NPInter	25531890	0.5483
RAID01640112	hsa-miR-4774-5p	miRNA	MIMAT0019929	Homo sapiens	HNRNPU	lncRNA	3192	Homo sapiens	CLIP	NPInter	23846593	0.5483
RAID01640225	hsa-miR-143-3p	miRNA	MIMAT0000435	Homo sapiens	MCM3AP-AS1	lncRNA	114044	Homo sapiens	CLIP-seq//Prediction	starBase//miRanda	None	0.6308
RAID01640830	hsa-let-7d-5p	miRNA	MIMAT0000065	Homo sapiens	MGC12916	lncRNA	84815	Homo sapiens	CLIP-seq//Prediction	starBase//miRanda	None	0.6308
RAID01640965	hsa-miR-454-3p	miRNA	MIMAT0003885	Homo sapiens	H19	lncRNA	283120	Homo sapiens	CLIP-seq//Prediction	starBase//miRanda	None	0.6308
RAID01641195	hsa-miR-4659a-5p	miRNA	MIMAT0019726	Homo sapiens	OIP5-AS1	lncRNA	729082	Homo sapiens	CLIP	NPInter	23846593	0.5483
RAID01641672	hsa-miR-3941	miRNA	MIMAT0018357	Homo sapiens	MALAT1	lncRNA	378938	Homo sapiens	CLIP	NPInter	23846593	0.5483
RAID01643939	hsa-miR-19a-3p	miRNA	MIMAT0000073	Homo sapiens	ZNRD1-AS1	lncRNA	80862	Homo sapiens	CLIP-seq//Prediction	starBase//miRanda	None	0.6308
RAID01645269	hsa-let-7b-5p	miRNA	MIMAT0000063	Homo sapiens	WT1-AS	lncRNA	51352	Homo sapiens	CLIP//Prediction	NPInter//miRanda	23846593	0.6308
RAID01648930	hsa-miR-525-3p	miRNA	MIMAT0002839	Homo sapiens	MALAT1	lncRNA	378938	Homo sapiens	CLIP	NPInter	23846593	0.5483
RAID01653326	hsa-miR-3126-5p	miRNA	MIMAT0014989	Homo sapiens	LINC00598	lncRNA	646982	Homo sapiens	PAR-CLIP	miRTarBase	23592263	0.5483
RAID01655467	hsa-let-7c-5p	miRNA	MIMAT0000064	Homo sapiens	TINCR	lncRNA	257000	Homo sapiens	CLIP-seq	starBase	None	0.5483
RAID01655658	hsa-miR-3129-5p	miRNA	MIMAT0014992	Homo sapiens	LINC00346	lncRNA	283487	Homo sapiens	CLIP-seq	miRTarBase	23824327	0.5483
RAID01656596	hsa-miR-320c	miRNA	MIMAT0005793	Homo sapiens	LINC00341	lncRNA	79686	Homo sapiens	CLIP-seq//Prediction	starBase//miRanda	None	0.6308
RAID01659247	hsa-miR-370-3p	miRNA	MIMAT0000722	Homo sapiens	H19	lncRNA	283120	Homo sapiens	CLIP-seq//Prediction	starBase//miRanda	None	0.6308
RAID01659624	hsa-miR-576-5p	miRNA	MIMAT0003241	Homo sapiens	MALAT1	lncRNA	378938	Homo sapiens	CLIP	NPInter	23846593	0.5483
RAID01661870	hsa-miR-3681-3p	miRNA	MIMAT0018109	Homo sapiens	SNHG1	lncRNA	23642	Homo sapiens	CLIP	NPInter	23846593	0.5483
RAID01662113	hsa-miR-223-3p	miRNA	MIMAT0000280	Homo sapiens	MIR17HG	lncRNA	407975	Homo sapiens	CLIP-seq//Prediction	starBase//miRanda	None	0.6308
RAID01662393	hsa-miR-937-3p	miRNA	MIMAT0004980	Homo sapiens	WT1-AS	lncRNA	51352	Homo sapiens	CLIP	NPInter	23846593	0.5483
RAID01664238	mmu-miR-98-5p	miRNA	MIMAT0000545	Mus musculus	Rab10os	lncRNA	74173	Mus musculus	CLIP-seq	starBase	None	0.5483
RAID01664457	hsa-miR-608	miRNA	MIMAT0003276	Homo sapiens	MALAT1	lncRNA	378938	Homo sapiens	CLIP	NPInter	23846593	0.5483
RAID01665423	hsa-miR-5095	miRNA	MIMAT0020600	Homo sapiens	LINC00598	lncRNA	646982	Homo sapiens	CLIP-seq	miRTarBase	23313552	0.5483
RAID01665487	hsa-let-7e-5p	miRNA	MIMAT0000066	Homo sapiens	CDKN2B-AS1	lncRNA	100048912	Homo sapiens	CLIP-seq//Prediction	starBase//miRanda	None	0.6308
RAID01669309	hsa-miR-324-5p	miRNA	MIMAT0000761	Homo sapiens	NUTM2D	lncRNA	728130	Homo sapiens	CLIP-seq//Prediction	starBase//miRanda	None	0.6308
RAID01673900	hsa-miR-331-3p	miRNA	MIMAT0000760	Homo sapiens	BCYRN1	lncRNA	618	Homo sapiens	CLIP	NPInter	23846593	0.5483
RAID01674817	hsa-miR-106a-5p	miRNA	MIMAT0000103	Homo sapiens	CASP8AP2	lncRNA	9994	Homo sapiens	CLIP	NPInter	25531890	0.5483
RAID01675800	hsa-let-7e-5p	miRNA	MIMAT0000066	Homo sapiens	SNHG4	lncRNA	724102	Homo sapiens	CLIP-seq//Prediction	starBase//miRanda	None	0.6308
RAID01676351	hsa-miR-138-2-3p	miRNA	MIMAT0004596	Homo sapiens	LINC00598	lncRNA	646982	Homo sapiens	CLIP-seq	miRTarBase	19536157	0.5483
RAID01676799	hsa-miR-186-5p	miRNA	MIMAT0000456	Homo sapiens	WT1-AS	lncRNA	51352	Homo sapiens	CLIP	NPInter	23846593	0.5483
RAID01677438	hsa-miR-449b-5p	miRNA	MIMAT0003327	Homo sapiens	XIST	lncRNA	7503	Homo sapiens	CLIP	NPInter	23846593	0.5483
RAID01678311	hsa-miR-433-3p	miRNA	MIMAT0001627	Homo sapiens	ZNF833P	lncRNA	401898	Homo sapiens	CLIP-seq//Prediction	starBase//miRanda	None	0.6308
RAID01679788	hsa-miR-181a-5p	miRNA	MIMAT0000256	Homo sapiens	MEG3	lncRNA	55384	Homo sapiens	RIP (RNA Immunoprecipitation)//Reporter Assay//RT-PCR//Prediction	RAID//miRanda	26253106	0.9612
RAID01681966	hsa-miR-202-3p	miRNA	MIMAT0002811	Homo sapiens	LOC143188	lncRNA	143188	Homo sapiens	CLIP-seq//Prediction	starBase//miRanda	None	0.6308
RAID01683670	hsa-miR-299-5p	miRNA	MIMAT0002890	Homo sapiens	URB1-AS1	lncRNA	84996	Homo sapiens	CLIP-seq	starBase	None	0.5483
RAID01685114	hsa-miR-1182	miRNA	MIMAT0005827	Homo sapiens	MIR22HG	lncRNA	84981	Homo sapiens	CLIP	NPInter	23846593	0.5483
RAID01687041	hsa-miR-106a-5p	miRNA	MIMAT0000103	Homo sapiens	GNAS-AS1	lncRNA	149775	Homo sapiens	CLIP	NPInter	25531890	0.5483
RAID01688393	hsa-miR-6124	miRNA	MIMAT0024597	Homo sapiens	BCYRN1	lncRNA	618	Homo sapiens	CLIP	NPInter	23846593	0.5483
RAID01689769	hsa-miR-96-5p	miRNA	MIMAT0000095	Homo sapiens	ST7-OT3	lncRNA	93655	Homo sapiens	CLIP-seq//Prediction	starBase//miRanda//TargetScan	None	0.6478
RAID01689949	hsa-miR-372-3p	miRNA	MIMAT0000724	Homo sapiens	DLEU1	lncRNA	10301	Homo sapiens	CLIP-seq	starBase	None	0.5483
RAID01690934	hsa-miR-1-3p	miRNA	MIMAT0000416	Homo sapiens	LINC00869	lncRNA	57234	Homo sapiens	CLIP-seq//Prediction	starBase//miRanda	None	0.6308
RAID01691044	hsa-miR-4802-5p	miRNA	MIMAT0019981	Homo sapiens	MIR22HG	lncRNA	84981	Homo sapiens	CLIP	NPInter	23846593	0.5483
RAID01691559	hsa-miR-924	miRNA	MIMAT0004974	Homo sapiens	BCYRN1	lncRNA	618	Homo sapiens	CLIP	NPInter	23846593	0.5483
RAID01691635	hsa-miR-153-3p	miRNA	MIMAT0000439	Homo sapiens	TUG1	lncRNA	55000	Homo sapiens	CLIP-seq//Prediction	starBase//miRanda	None	0.6308
RAID01692076	hsa-miR-6506-5p	miRNA	MIMAT0025468	Homo sapiens	SNHG3	lncRNA	8420	Homo sapiens	CLIP	NPInter	23846593	0.5483
RAID01694676	hsa-miR-19a-3p	miRNA	MIMAT0000073	Homo sapiens	SNHG20	lncRNA	654434	Homo sapiens	CLIP-seq//Prediction	starBase//miRanda	None	0.6308
RAID01697607	hsa-miR-346	miRNA	MIMAT0000773	Homo sapiens	RPS10P7	lncRNA	376693	Homo sapiens	CLIP-seq//Prediction	starBase//miRanda	None	0.6308
RAID01697890	hsa-miR-106a-5p	miRNA	MIMAT0000103	Homo sapiens	LINC00630	lncRNA	100287765	Homo sapiens	CLIP	NPInter	25531890	0.5483
RAID01699512	hsa-miR-3690	miRNA	MIMAT0018119	Homo sapiens	XIST	lncRNA	7503	Homo sapiens	CLIP	NPInter	23846593	0.5483
RAID01699664	hsa-miR-4699-3p	miRNA	MIMAT0019795	Homo sapiens	WT1-AS	lncRNA	51352	Homo sapiens	CLIP	NPInter	23846593	0.5483
RAID01703021	hsa-miR-103a-3p	miRNA	MIMAT0000101	Homo sapiens	BCYRN1	lncRNA	618	Homo sapiens	CLIP	NPInter	23846593	0.5483
RAID01703993	hsa-miR-106a-5p	miRNA	MIMAT0000103	Homo sapiens	HAGLR	lncRNA	401022	Homo sapiens	CLIP	NPInter	25531890	0.5483
RAID01706188	hsa-miR-1224-3p	miRNA	MIMAT0005459	Homo sapiens	SNHG3	lncRNA	8420	Homo sapiens	CLIP	NPInter	23846593	0.5483
RAID01707027	hsa-miR-4772-3p	miRNA	MIMAT0019927	Homo sapiens	LINC00632	lncRNA	286411	Homo sapiens	CLIP-seq	miRTarBase	23824327	0.5483
RAID01707216	hsa-let-7d-3p	miRNA	MIMAT0004484	Homo sapiens	LINC00598	lncRNA	646982	Homo sapiens	CLIP-seq	miRTarBase	19536157	0.5483
RAID01707560	hsa-miR-29b-3p	miRNA	MIMAT0000100	Homo sapiens	XIST	lncRNA	7503	Homo sapiens	CLIP	NPInter	23846593	0.5483
RAID01708347	hsa-miR-340-3p	miRNA	MIMAT0000750	Homo sapiens	CLUHP3	lncRNA	100132341	Homo sapiens	CLIP-seq	starBase	None	0.5483
RAID01709029	hsa-miR-1304-3p	miRNA	MIMAT0022720	Homo sapiens	BCYRN1	lncRNA	618	Homo sapiens	CLIP	NPInter	23846593	0.5483
RAID01711687	hsa-miR-873-5p	miRNA	MIMAT0004953	Homo sapiens	LINC00598	lncRNA	646982	Homo sapiens	PAR-CLIP	miRTarBase	23592263	0.5483
RAID01711950	hsa-miR-335-5p	miRNA	MIMAT0000765	Homo sapiens	CECR7	lncRNA	100130418	Homo sapiens	CLIP-seq//Prediction	starBase//miRanda	None	0.6308
RAID01715443	hsa-miR-522-3p	miRNA	MIMAT0002868	Homo sapiens	XIST	lncRNA	7503	Homo sapiens	CLIP	NPInter	23846593	0.5483
RAID01717587	hsa-miR-4766-5p	miRNA	MIMAT0019917	Homo sapiens	MALAT1	lncRNA	378938	Homo sapiens	CLIP	NPInter	23846593	0.5483
RAID01717943	hsa-miR-875-5p	miRNA	MIMAT0004922	Homo sapiens	JPX	lncRNA	554203	Homo sapiens	CLIP-seq//Prediction	starBase//miRanda	None	0.6308
RAID01719201	hsa-miR-3606-3p	miRNA	MIMAT0022965	Homo sapiens	LOH12CR2	lncRNA	503693	Homo sapiens	PAR-CLIP	miRTarBase	22291592//22100165	0.5483
RAID01722580	hsa-miR-429	miRNA	MIMAT0001536	Homo sapiens	CRHR1-IT1	lncRNA	147081	Homo sapiens	CLIP-seq//Prediction	starBase//miRanda	None	0.6308
RAID01724258	hsa-miR-155-5p	miRNA	MIMAT0000646	Homo sapiens	LOC90246	lncRNA	90246	Homo sapiens	CLIP-seq//Prediction	starBase//miRanda	None	0.6308
RAID01727399	hsa-miR-584-5p	miRNA	MIMAT0003249	Homo sapiens	WT1-AS	lncRNA	51352	Homo sapiens	CLIP	NPInter	23846593	0.5483
RAID01728169	hsa-miR-4743-5p	miRNA	MIMAT0019874	Homo sapiens	XIST	lncRNA	7503	Homo sapiens	CLIP	NPInter	23846593	0.5483
RAID01728212	hsa-miR-335-5p	miRNA	MIMAT0000765	Homo sapiens	LINC00238	lncRNA	440184	Homo sapiens	Microarray	miRTarBase	18185580	0.5483
RAID01730182	hsa-miR-888-3p	miRNA	MIMAT0004917	Homo sapiens	WT1-AS	lncRNA	51352	Homo sapiens	CLIP	NPInter	23846593	0.5483
RAID01730917	hsa-miR-5689	miRNA	MIMAT0022481	Homo sapiens	MIR22HG	lncRNA	84981	Homo sapiens	CLIP	NPInter	23846593	0.5483
RAID01734502	hsa-miR-4775	miRNA	MIMAT0019931	Homo sapiens	WT1-AS	lncRNA	51352	Homo sapiens	CLIP	NPInter	23846593	0.5483
RAID01740092	mmu-miR-592-5p	miRNA	MIMAT0003730	Mus musculus	AI504432	lncRNA	229694	Mus musculus	CLIP-seq//Prediction	starBase//miRanda	None	0.6308
RAID01743461	hsa-miR-548w	miRNA	MIMAT0015060	Homo sapiens	OIP5-AS1	lncRNA	729082	Homo sapiens	CLIP	NPInter	23846593	0.5483
RAID01744138	hsa-miR-20a-5p	miRNA	MIMAT0000075	Homo sapiens	PVT1	lncRNA	5820	Homo sapiens	CLIP-seq//Prediction	starBase//miRanda	None	0.6308
RAID01744419	hsa-miR-21-5p	miRNA	MIMAT0000076	Homo sapiens	MCM3AP-AS1	lncRNA	114044	Homo sapiens	CLIP-seq//Prediction	starBase//miRanda	None	0.6308
RAID01745093	mmu-miR-449a-5p	miRNA	MIMAT0001542	Mus musculus	Rab10os	lncRNA	74173	Mus musculus	CLIP-seq//Prediction	starBase//miRanda	None	0.6308
RAID01746740	hsa-miR-106a-5p	miRNA	MIMAT0000103	Homo sapiens	LINC00518	lncRNA	221718	Homo sapiens	CLIP	NPInter	25531890	0.5483
RAID01749844	hsa-miR-4644	miRNA	MIMAT0019704	Homo sapiens	OIP5-AS1	lncRNA	729082	Homo sapiens	CLIP	NPInter	23846593	0.5483
RAID01749848	hsa-miR-3148	miRNA	MIMAT0015021	Homo sapiens	OIP5-AS1	lncRNA	729082	Homo sapiens	CLIP	NPInter	23846593	0.5483
RAID01750263	hsa-miR-4524a-3p	miRNA	MIMAT0019063	Homo sapiens	BCYRN1	lncRNA	618	Homo sapiens	CLIP	NPInter	23846593	0.5483
RAID01751447	hsa-miR-1283	miRNA	MIMAT0005799	Homo sapiens	LINC00461	lncRNA	645323	Homo sapiens	CLIP	NPInter	23846593	0.5483
RAID01752740	hsa-miR-664a-3p	miRNA	MIMAT0005949	Homo sapiens	LINC00598	lncRNA	646982	Homo sapiens	PAR-CLIP	miRTarBase	20371350	0.5483
RAID01752845	mmu-miR-20a-5p	miRNA	MIMAT0000529	Mus musculus	BC029722	lncRNA	613262	Mus musculus	CLIP-seq	starBase	None	0.5483
RAID01752851	hsa-miR-3129-5p	miRNA	MIMAT0014992	Homo sapiens	XIST	lncRNA	7503	Homo sapiens	CLIP	NPInter	23846593	0.5483
RAID01752860	hsa-miR-6507-3p	miRNA	MIMAT0025471	Homo sapiens	XIST	lncRNA	7503	Homo sapiens	CLIP	NPInter	23846593	0.5483
RAID01756484	hsa-miR-346	miRNA	MIMAT0000773	Homo sapiens	BCYRN1	lncRNA	618	Homo sapiens	CLIP	NPInter	23846593	0.5483
RAID01757706	hsa-miR-21-5p	miRNA	MIMAT0000076	Homo sapiens	PTENP1	lncRNA	11191	Homo sapiens	Reporter Assay//RT-PCR//Western Blot	RAID	20577206	0.9526
RAID01758453	hsa-miR-485-5p	miRNA	MIMAT0002175	Homo sapiens	BCYRN1	lncRNA	618	Homo sapiens	CLIP	NPInter	23846593	0.5483
RAID01758947	hsa-miR-432-5p	miRNA	MIMAT0002814	Homo sapiens	BCYRN1	lncRNA	618	Homo sapiens	CLIP	NPInter	23846593	0.5483
RAID01759095	hsa-miR-335-5p	miRNA	MIMAT0000765	Homo sapiens	LINC01545	lncRNA	724087	Homo sapiens	Microarray	miRTarBase	18185580	0.5483
RAID01762183	hsa-miR-525-5p	miRNA	MIMAT0002838	Homo sapiens	TP73-AS1	lncRNA	57212	Homo sapiens	CLIP-seq	starBase	None	0.5483
RAID01763077	hsa-miR-1182	miRNA	MIMAT0005827	Homo sapiens	XIST	lncRNA	7503	Homo sapiens	CLIP	NPInter	23846593	0.5483
RAID01766284	hsa-miR-5096	miRNA	MIMAT0020603	Homo sapiens	OIP5-AS1	lncRNA	729082	Homo sapiens	CLIP	NPInter	23846593	0.5483
RAID01767523	hsa-miR-182-5p	miRNA	MIMAT0000259	Homo sapiens	ST7-OT3	lncRNA	93655	Homo sapiens	CLIP-seq//Prediction	starBase//miRanda	None	0.6308
RAID01768337	hsa-miR-539-3p	miRNA	MIMAT0022705	Homo sapiens	LINC00598	lncRNA	646982	Homo sapiens	PAR-CLIP	miRTarBase	20371350	0.5483
RAID01768465	hsa-miR-377-3p	miRNA	MIMAT0000730	Homo sapiens	TP73-AS1	lncRNA	57212	Homo sapiens	CLIP-seq//Prediction	starBase//miRanda	None	0.6308
RAID01769636	hsa-miR-4726-3p	miRNA	MIMAT0019846	Homo sapiens	XIST	lncRNA	7503	Homo sapiens	CLIP	NPInter	23846593	0.5483
RAID01770032	hsa-miR-106b-5p	miRNA	MIMAT0000680	Homo sapiens	LINC00598	lncRNA	646982	Homo sapiens	CLIP-seq	miRTarBase	23313552	0.5483
RAID01770435	hsa-miR-155-5p	miRNA	MIMAT0000646	Homo sapiens	INE1	lncRNA	8552	Homo sapiens	CLIP-seq//Prediction	starBase//miRanda	None	0.6308
RAID01770522	hsa-miR-106a-5p	miRNA	MIMAT0000103	Homo sapiens	ASH1L-IT1	lncRNA	106478976	Homo sapiens	CLIP	NPInter	25531890	0.5483
RAID01770752	hsa-miR-1248	miRNA	MIMAT0005900	Homo sapiens	LINC00598	lncRNA	646982	Homo sapiens	CLIP-seq	miRTarBase	23824327	0.5483
RAID01772736	hsa-miR-106a-5p	miRNA	MIMAT0000103	Homo sapiens	ZMYND10-AS1	lncRNA	100874210	Homo sapiens	CLIP	NPInter	25531890	0.5483
RAID01773399	hsa-miR-6890-3p	miRNA	MIMAT0027681	Homo sapiens	LINC00598	lncRNA	646982	Homo sapiens	CLIP-seq	miRTarBase	23824327	0.5483
RAID01779909	hsa-miR-454-3p	miRNA	MIMAT0003885	Homo sapiens	XIST	lncRNA	7503	Homo sapiens	CLIP	NPInter	23846593	0.5483
RAID01780103	hsa-miR-129-5p	miRNA	MIMAT0000242	Homo sapiens	CROCCP2	lncRNA	84809	Homo sapiens	CLIP-seq	starBase	None	0.5483
RAID01781087	hsa-miR-455-5p	miRNA	MIMAT0003150	Homo sapiens	OIP5-AS1	lncRNA	729082	Homo sapiens	CLIP//Prediction	NPInter//miRanda	23846593	0.6308
RAID01782236	hsa-miR-6785-5p	miRNA	MIMAT0027470	Homo sapiens	BDNF-AS	lncRNA	497258	Homo sapiens	PAR-CLIP	miRTarBase	23592263	0.5483
RAID01782333	hsa-miR-378a-5p	miRNA	MIMAT0000731	Homo sapiens	BCYRN1	lncRNA	618	Homo sapiens	CLIP	NPInter	23846593	0.5483
RAID01783662	hsa-miR-335-5p	miRNA	MIMAT0000765	Homo sapiens	LINC00334	lncRNA	114042	Homo sapiens	Microarray	miRTarBase	18185580	0.5483
RAID01786179	hsa-miR-338-3p	miRNA	MIMAT0000763	Homo sapiens	OIP5-AS1	lncRNA	729082	Homo sapiens	CLIP	NPInter	23846593	0.5483
RAID01790662	hsa-miR-449a	miRNA	MIMAT0001541	Homo sapiens	XIST	lncRNA	7503	Homo sapiens	CLIP	NPInter	23846593	0.5483
RAID01791787	hsa-miR-370-3p	miRNA	MIMAT0000722	Homo sapiens	XIST	lncRNA	7503	Homo sapiens	CLIP	NPInter	23846593	0.5483
RAID01792396	hsa-miR-4504	miRNA	MIMAT0019040	Homo sapiens	XIST	lncRNA	7503	Homo sapiens	CLIP	NPInter	23846593	0.5483
RAID01795096	hsa-miR-106a-5p	miRNA	MIMAT0000103	Homo sapiens	H19	lncRNA	283120	Homo sapiens	CLIP	NPInter	25531890	0.5483
RAID01795277	hsa-miR-1207-5p	miRNA	MIMAT0005871	Homo sapiens	CTD-3080P12.3	lncRNA	101928857	Homo sapiens	Western Blot//Reporter Assay//FISH (Fluorescence In Situ Hybridization)//RT-PCR	RAID	26549025	0.982
RAID01796065	hsa-miR-142-3p	miRNA	MIMAT0000434	Homo sapiens	DANCR	lncRNA	57291	Homo sapiens	CLIP-seq//Prediction	starBase//miRanda	None	0.6308
RAID01797832	hsa-miR-4769-5p	miRNA	MIMAT0019922	Homo sapiens	XIST	lncRNA	7503	Homo sapiens	CLIP	NPInter	23846593	0.5483
RAID01799408	hsa-miR-9-5p	miRNA	MIMAT0000441	Homo sapiens	HEXA-AS1	lncRNA	80072	Homo sapiens	CLIP-seq//Prediction	starBase//miRanda	None	0.6308
RAID01799427	hsa-miR-424-5p	miRNA	MIMAT0001341	Homo sapiens	XIST	lncRNA	7503	Homo sapiens	CLIP	NPInter	23846593	0.5483
RAID01800881	hsa-miR-301a-3p	miRNA	MIMAT0000688	Homo sapiens	CRHR1-IT1	lncRNA	147081	Homo sapiens	CLIP-seq//Prediction	starBase//miRanda	None	0.6308
RAID01806971	hsa-miR-106a-5p	miRNA	MIMAT0000103	Homo sapiens	AMMECR1-IT1	lncRNA	100874352	Homo sapiens	CLIP	NPInter	25531890	0.5483
RAID01807034	mmu-miR-367-3p	miRNA	MIMAT0003181	Mus musculus	6330403K07Rik	lncRNA	103712	Mus musculus	CLIP-seq	starBase	None	0.5483
RAID01807778	hsa-miR-106a-5p	miRNA	MIMAT0000103	Homo sapiens	DHRS4-AS1	lncRNA	55449	Homo sapiens	CLIP	NPInter	25531890	0.5483
RAID01809195	hsa-miR-32-5p	miRNA	MIMAT0000090	Homo sapiens	WHAMMP2	lncRNA	440253	Homo sapiens	CLIP-seq//Prediction	starBase//miRanda	None	0.6308
RAID01810112	hsa-miR-24-2-5p	miRNA	MIMAT0004497	Homo sapiens	HNRNPU	lncRNA	3192	Homo sapiens	CLIP	NPInter	23846593	0.5483
RAID01813593	hsa-miR-130a-3p	miRNA	MIMAT0000425	Homo sapiens	LINC00339	lncRNA	29092	Homo sapiens	CLIP-seq//Prediction	starBase//miRanda	None	0.6308
RAID01815974	hsa-miR-300	miRNA	MIMAT0004903	Homo sapiens	BCYRN1	lncRNA	618	Homo sapiens	CLIP	NPInter	23846593	0.5483
RAID01816336	hsa-miR-1911-3p	miRNA	MIMAT0007886	Homo sapiens	XIST	lncRNA	7503	Homo sapiens	CLIP	NPInter	23846593	0.5483
RAID01819425	hsa-miR-7151-3p	miRNA	MIMAT0028213	Homo sapiens	LINC00598	lncRNA	646982	Homo sapiens	CLIP-seq	miRTarBase	23313552	0.5483
RAID01821216	hsa-miR-6127	miRNA	MIMAT0024610	Homo sapiens	LINC00598	lncRNA	646982	Homo sapiens	PAR-CLIP	miRTarBase	23592263	0.5483
RAID01822639	hsa-miR-2682-3p	miRNA	MIMAT0013518	Homo sapiens	LINC00632	lncRNA	286411	Homo sapiens	CLIP-seq	miRTarBase	23824327	0.5483
RAID01822800	hsa-miR-431-5p	miRNA	MIMAT0001625	Homo sapiens	TP73-AS1	lncRNA	57212	Homo sapiens	CLIP-seq	starBase	None	0.5483
RAID01823236	hsa-miR-584-5p	miRNA	MIMAT0003249	Homo sapiens	MIR22HG	lncRNA	84981	Homo sapiens	CLIP	NPInter	23846593	0.5483
RAID01823644	hsa-miR-548z	miRNA	MIMAT0018446	Homo sapiens	HNRNPU	lncRNA	3192	Homo sapiens	CLIP	NPInter	23846593	0.5483
RAID01825890	hsa-miR-548p	miRNA	MIMAT0005934	Homo sapiens	XIST	lncRNA	7503	Homo sapiens	CLIP	NPInter	23846593	0.5483
RAID01826355	hsa-miR-19a-3p	miRNA	MIMAT0000073	Homo sapiens	FAM201A	lncRNA	158228	Homo sapiens	CLIP-seq//Prediction	starBase//miRanda	None	0.6308
RAID01826440	mmu-miR-25-3p	miRNA	MIMAT0000652	Mus musculus	6330403K07Rik	lncRNA	103712	Mus musculus	CLIP-seq	starBase	None	0.5483
RAID01828182	hsa-miR-4645-5p	miRNA	MIMAT0019705	Homo sapiens	BCYRN1	lncRNA	618	Homo sapiens	CLIP	NPInter	23846593	0.5483
RAID01830014	hsa-miR-524-5p	miRNA	MIMAT0002849	Homo sapiens	XIST	lncRNA	7503	Homo sapiens	CLIP	NPInter	23846593	0.5483
RAID01830763	hsa-miR-519d-3p	miRNA	MIMAT0002853	Homo sapiens	SNHG20	lncRNA	654434	Homo sapiens	CLIP-seq//Prediction	starBase//miRanda	None	0.6308
RAID01831105	hsa-miR-302b-3p	miRNA	MIMAT0000715	Homo sapiens	MIR17HG	lncRNA	407975	Homo sapiens	CLIP-seq//Prediction	starBase//miRanda	None	0.6308
RAID01832517	hsa-miR-371a-5p	miRNA	MIMAT0004687	Homo sapiens	DLEU1	lncRNA	10301	Homo sapiens	CLIP-seq	miRTarBase	23824327	0.5483
RAID01832793	hsa-miR-197-3p	miRNA	MIMAT0000227	Homo sapiens	CTBP1-AS2	lncRNA	92070	Homo sapiens	CLIP-seq//Prediction	starBase//miRanda	None	0.6308
RAID01833526	hsa-miR-5586-3p	miRNA	MIMAT0022288	Homo sapiens	OIP5-AS1	lncRNA	729082	Homo sapiens	CLIP	NPInter	23846593	0.5483
RAID01836293	hsa-miR-9-5p	miRNA	MIMAT0000441	Homo sapiens	LINC00461	lncRNA	645323	Homo sapiens	CLIP	NPInter	23846593	0.5483
RAID01836948	hsa-miR-33b-5p	miRNA	MIMAT0003301	Homo sapiens	DANCR	lncRNA	57291	Homo sapiens	CLIP-seq//Prediction	starBase//miRanda	None	0.6308
RAID01837414	hsa-miR-186-5p	miRNA	MIMAT0000456	Homo sapiens	XIST	lncRNA	7503	Homo sapiens	CLIP	NPInter	23846593	0.5483
RAID01839353	hsa-miR-103a-2-5p	miRNA	MIMAT0009196	Homo sapiens	BCYRN1	lncRNA	618	Homo sapiens	CLIP	NPInter	23846593	0.5483
RAID01840681	hsa-miR-505-3p	miRNA	MIMAT0002876	Homo sapiens	LOC645166	lncRNA	645166	Homo sapiens	CLIP-seq//Prediction	starBase//miRanda	None	0.6308
RAID01846513	mmu-miR-196a-5p	miRNA	MIMAT0000518	Mus musculus	Dnm3os	lncRNA	474332	Mus musculus	CLIP-seq	starBase	None	0.5483
RAID01848197	hsa-let-7e-5p	miRNA	MIMAT0000066	Homo sapiens	KRASP1	lncRNA	3844	Homo sapiens	Reporter Assay//RT-PCR	RAID	20577206	0.8808
RAID01850969	hsa-miR-4712-5p	miRNA	MIMAT0019818	Homo sapiens	BCYRN1	lncRNA	618	Homo sapiens	CLIP	NPInter	23846593	0.5483
RAID01854040	hsa-miR-495-3p	miRNA	MIMAT0002817	Homo sapiens	MGC12916	lncRNA	84815	Homo sapiens	CLIP-seq//Prediction	starBase//miRanda	None	0.6308
RAID01855460	hsa-miR-4793-5p	miRNA	MIMAT0019965	Homo sapiens	BCYRN1	lncRNA	618	Homo sapiens	CLIP	NPInter	23846593	0.5483
RAID01859636	hsa-miR-3672	miRNA	MIMAT0018095	Homo sapiens	HNRNPU	lncRNA	3192	Homo sapiens	CLIP	NPInter	23846593	0.5483
RAID01860019	hsa-let-7a-5p	miRNA	MIMAT0000062	Homo sapiens	TINCR	lncRNA	257000	Homo sapiens	CLIP-seq	starBase	None	0.5483
RAID01862366	hsa-miR-4510	miRNA	MIMAT0019047	Homo sapiens	XIST	lncRNA	7503	Homo sapiens	CLIP	NPInter	23846593	0.5483
RAID01862835	hsa-miR-365a-3p	miRNA	MIMAT0000710	Homo sapiens	PVT1	lncRNA	5820	Homo sapiens	CLIP-seq//Prediction	starBase//miRanda	None	0.6308
RAID01863214	hsa-miR-3176	miRNA	MIMAT0015053	Homo sapiens	BCYRN1	lncRNA	618	Homo sapiens	CLIP	NPInter	23846593	0.5483
RAID01864814	hsa-miR-495-3p	miRNA	MIMAT0002817	Homo sapiens	JPX	lncRNA	554203	Homo sapiens	CLIP-seq//Prediction	starBase//miRanda	None	0.6308
RAID01865364	hsa-miR-372-3p	miRNA	MIMAT0000724	Homo sapiens	MIR17HG	lncRNA	407975	Homo sapiens	CLIP-seq//Prediction	starBase//miRanda	None	0.6308
RAID01866884	hsa-miR-106a-5p	miRNA	MIMAT0000103	Homo sapiens	H1FX-AS1	lncRNA	339942	Homo sapiens	CLIP	NPInter	25531890	0.5483
RAID01866950	hsa-miR-24-3p	miRNA	MIMAT0000080	Homo sapiens	TUG1	lncRNA	55000	Homo sapiens	CLIP-seq	starBase	None	0.5483
RAID01869281	hsa-miR-335-5p	miRNA	MIMAT0000765	Homo sapiens	LINC00470	lncRNA	56651	Homo sapiens	Microarray	miRTarBase	18185580	0.5483
RAID01870044	hsa-miR-21-3p	miRNA	MIMAT0004494	Homo sapiens	MALAT1	lncRNA	378938	Homo sapiens	CLIP	NPInter	23846593	0.5483
RAID01871791	hsa-miR-106a-5p	miRNA	MIMAT0000103	Homo sapiens	WWTR1-AS1	lncRNA	100128025	Homo sapiens	CLIP	NPInter	25531890	0.5483
RAID01872939	hsa-let-7c-5p	miRNA	MIMAT0000064	Homo sapiens	SNHG4	lncRNA	724102	Homo sapiens	CLIP-seq//Prediction	starBase//miRanda	None	0.6308
RAID01874139	hsa-miR-363-5p	miRNA	MIMAT0003385	Homo sapiens	BCYRN1	lncRNA	618	Homo sapiens	CLIP	NPInter	23846593	0.5483
RAID01875520	hsa-miR-138-1-3p	miRNA	MIMAT0004607	Homo sapiens	OIP5-AS1	lncRNA	729082	Homo sapiens	CLIP	NPInter	23846593	0.5483
RAID01879151	hsa-miR-302e	miRNA	MIMAT0005931	Homo sapiens	MIR17HG	lncRNA	407975	Homo sapiens	CLIP-seq//Prediction	starBase//miRanda	None	0.6308
RAID01884598	hsa-miR-106a-5p	miRNA	MIMAT0000103	Homo sapiens	HOTTIP	lncRNA	100316868	Homo sapiens	CLIP	NPInter	25531890	0.5483
RAID01885029	hsa-miR-548s	miRNA	MIMAT0014987	Homo sapiens	OIP5-AS1	lncRNA	729082	Homo sapiens	CLIP	NPInter	23846593	0.5483
RAID01886002	hsa-miR-3913-5p	miRNA	MIMAT0018187	Homo sapiens	XIST	lncRNA	7503	Homo sapiens	CLIP	NPInter	23846593	0.5483
RAID01888638	hsa-miR-195-5p	miRNA	MIMAT0000461	Homo sapiens	XIST	lncRNA	7503	Homo sapiens	CLIP	NPInter	23846593	0.5483
RAID01888953	hsa-miR-4711-3p	miRNA	MIMAT0019817	Homo sapiens	BCYRN1	lncRNA	618	Homo sapiens	CLIP	NPInter	23846593	0.5483
RAID01892167	hsa-miR-4459	miRNA	MIMAT0018981	Homo sapiens	BCYRN1	lncRNA	618	Homo sapiens	CLIP	NPInter	23846593	0.5483
RAID01892194	mmu-miR-27b-3p	miRNA	MIMAT0000126	Mus musculus	AI504432	lncRNA	229694	Mus musculus	CLIP-seq//Prediction	starBase//miRanda	None	0.6308
RAID01892533	hsa-miR-6880-3p	miRNA	MIMAT0027661	Homo sapiens	LINC00598	lncRNA	646982	Homo sapiens	CLIP-seq	miRTarBase	23824327	0.5483
RAID01892724	hsa-miR-4760-3p	miRNA	MIMAT0019907	Homo sapiens	OIP5-AS1	lncRNA	729082	Homo sapiens	CLIP	NPInter	23846593	0.5483
RAID01894037	hsa-miR-665	miRNA	MIMAT0004952	Homo sapiens	LINC00598	lncRNA	646982	Homo sapiens	CLIP-seq	miRTarBase	23824327	0.5483
RAID01894946	hsa-miR-15a-5p	miRNA	MIMAT0000068	Homo sapiens	PVT1	lncRNA	5820	Homo sapiens	CLIP-seq//Prediction	starBase//miRanda	None	0.6308
RAID01895228	hsa-miR-192-5p	miRNA	MIMAT0000222	Homo sapiens	DGCR11	lncRNA	25786	Homo sapiens	Microarray	miRTarBase	19074876	0.5483
RAID01896413	hsa-miR-26b-5p	miRNA	MIMAT0000083	Homo sapiens	C1QTNF9B-AS1	lncRNA	542767	Homo sapiens	Microarray	miRTarBase	19088304	0.5483
RAID01897684	hsa-miR-106a-5p	miRNA	MIMAT0000103	Homo sapiens	DLEU2	lncRNA	8847	Homo sapiens	CLIP	NPInter	25531890	0.5483
RAID01899224	hsa-miR-6507-3p	miRNA	MIMAT0025471	Homo sapiens	LINC00598	lncRNA	646982	Homo sapiens	CLIP-seq	miRTarBase	23824327	0.5483
RAID01903721	hsa-miR-5787	miRNA	MIMAT0023252	Homo sapiens	OIP5-AS1	lncRNA	729082	Homo sapiens	CLIP	NPInter	23846593	0.5483
RAID01904039	hsa-miR-515-3p	miRNA	MIMAT0002827	Homo sapiens	TUG1	lncRNA	55000	Homo sapiens	CLIP-seq	starBase	None	0.5483
RAID01904861	mmu-miR-363-3p	miRNA	MIMAT0000708	Mus musculus	6330403K07Rik	lncRNA	103712	Mus musculus	CLIP-seq	starBase	None	0.5483
RAID01906518	hsa-miR-3689c	miRNA	MIMAT0019007	Homo sapiens	BCYRN1	lncRNA	618	Homo sapiens	CLIP	NPInter	23846593	0.5483
RAID01907245	hsa-miR-4421	miRNA	MIMAT0018934	Homo sapiens	MALAT1	lncRNA	378938	Homo sapiens	CLIP	NPInter	23846593	0.5483
RAID01908661	hsa-miR-219a-5p	miRNA	MIMAT0000276	Homo sapiens	LINC00339	lncRNA	29092	Homo sapiens	CLIP-seq//Prediction	starBase//miRanda	None	0.6308
RAID01909255	mmu-let-7c-5p	miRNA	MIMAT0000523	Mus musculus	Trp53cor1	lncRNA	100504267	Mus musculus	Chromatography technology	NPInter	22813890	0.7311
RAID01910318	hsa-miR-4799-3p	miRNA	MIMAT0019977	Homo sapiens	MALAT1	lncRNA	378938	Homo sapiens	CLIP	NPInter	23846593	0.5483
RAID01911841	hsa-miR-4707-3p	miRNA	MIMAT0019808	Homo sapiens	MIR137HG	lncRNA	400765	Homo sapiens	CLIP	NPInter	23846593	0.5483
RAID01912500	hsa-miR-186-5p	miRNA	MIMAT0000456	Homo sapiens	BDNF-AS	lncRNA	497258	Homo sapiens	PAR-CLIP//Prediction	miRTarBase//miRanda	23592263	0.6308
RAID01915793	hsa-miR-3116	miRNA	MIMAT0014978	Homo sapiens	GAS5	lncRNA	60674	Homo sapiens	CLIP	NPInter	23846593	0.5483
RAID01919710	hsa-miR-544a	miRNA	MIMAT0003164	Homo sapiens	PVT1	lncRNA	5820	Homo sapiens	CLIP-seq//Prediction	starBase//miRanda	None	0.6308
RAID01922441	hsa-miR-29a-3p	miRNA	MIMAT0000086	Homo sapiens	BREA2	lncRNA	286076	Homo sapiens	CLIP-seq//Prediction	starBase//miRanda	None	0.6308
RAID01922891	hsa-miR-513b-5p	miRNA	MIMAT0005788	Homo sapiens	MALAT1	lncRNA	378938	Homo sapiens	CLIP	NPInter	23846593	0.5483
RAID01925497	hsa-miR-320d	miRNA	MIMAT0006764	Homo sapiens	XIST	lncRNA	7503	Homo sapiens	CLIP	NPInter	23846593	0.5483
RAID01925893	hsa-miR-2115-5p	miRNA	MIMAT0011158	Homo sapiens	MALAT1	lncRNA	378938	Homo sapiens	CLIP	NPInter	23846593	0.5483
RAID01927312	hsa-miR-4786-5p	miRNA	MIMAT0019954	Homo sapiens	BDNF-AS	lncRNA	497258	Homo sapiens	PAR-CLIP	miRTarBase	23592263	0.5483
RAID01928501	hsa-miR-519a-3p	miRNA	MIMAT0002869	Homo sapiens	THSD1P1	lncRNA	374500	Homo sapiens	CLIP-seq	starBase	None	0.5483
RAID01931853	hsa-miR-340-5p	miRNA	MIMAT0004692	Homo sapiens	MCM3AP-AS1	lncRNA	114044	Homo sapiens	CLIP-seq//Prediction	starBase//miRanda	None	0.6308
RAID01931927	hsa-miR-4482-3p	miRNA	MIMAT0020958	Homo sapiens	OIP5-AS1	lncRNA	729082	Homo sapiens	CLIP	NPInter	23846593	0.5483
RAID01935818	hsa-miR-3156-5p	miRNA	MIMAT0015030	Homo sapiens	OIP5-AS1	lncRNA	729082	Homo sapiens	CLIP	NPInter	23846593	0.5483
RAID01936076	hsa-miR-106a-5p	miRNA	MIMAT0000103	Homo sapiens	PRRT3-AS1	lncRNA	100874032	Homo sapiens	CLIP	NPInter	25531890	0.5483
RAID01938090	hsa-miR-7111-5p	miRNA	MIMAT0028119	Homo sapiens	BDNF-AS	lncRNA	497258	Homo sapiens	PAR-CLIP	miRTarBase	23592263	0.5483
RAID01941578	hsa-miR-15a-5p	miRNA	MIMAT0000068	Homo sapiens	TEX41	lncRNA	401014	Homo sapiens	CLIP-seq//Prediction	starBase//miRanda	None	0.6308
RAID01944840	hsa-miR-216b-5p	miRNA	MIMAT0004959	Homo sapiens	DLEU1	lncRNA	10301	Homo sapiens	CLIP-seq//Prediction	starBase//miRanda	None	0.6308
RAID01945600	hsa-miR-320b	miRNA	MIMAT0005792	Homo sapiens	LOC389641	lncRNA	389641	Homo sapiens	CLIP-seq//Prediction	starBase//miRanda	None	0.6308
RAID01948618	hsa-miR-383-3p	miRNA	MIMAT0026485	Homo sapiens	LINC00598	lncRNA	646982	Homo sapiens	CLIP-seq	miRTarBase	23824327	0.5483
RAID01949056	hsa-miR-3929	miRNA	MIMAT0018206	Homo sapiens	BCYRN1	lncRNA	618	Homo sapiens	CLIP	NPInter	23846593	0.5483
RAID01949657	hsa-miR-1285-3p	miRNA	MIMAT0005876	Homo sapiens	OIP5-AS1	lncRNA	729082	Homo sapiens	CLIP	NPInter	23846593	0.5483
RAID01953173	hsa-miR-29c-3p	miRNA	MIMAT0000681	Homo sapiens	BREA2	lncRNA	286076	Homo sapiens	CLIP-seq//Prediction	starBase//miRanda	None	0.6308
RAID01953197	hsa-miR-1268b	miRNA	MIMAT0018925	Homo sapiens	BCYRN1	lncRNA	618	Homo sapiens	CLIP	NPInter	23846593	0.5483
RAID01953219	hsa-miR-1270	miRNA	MIMAT0005924	Homo sapiens	OIP5-AS1	lncRNA	729082	Homo sapiens	CLIP	NPInter	23846593	0.5483
RAID01953926	hsa-miR-335-5p	miRNA	MIMAT0000765	Homo sapiens	ADORA2A-AS1	lncRNA	646023	Homo sapiens	Microarray	miRTarBase	18185580	0.5483
RAID01957321	hsa-miR-639	miRNA	MIMAT0003309	Homo sapiens	MIR137HG	lncRNA	400765	Homo sapiens	CLIP	NPInter	23846593	0.5483
RAID01959363	hsa-miR-762	miRNA	MIMAT0010313	Homo sapiens	HOXA10-AS	lncRNA	100874323	Homo sapiens	CLIP	NPInter	23846593	0.5483
RAID01960930	hsa-miR-548aw	miRNA	MIMAT0022471	Homo sapiens	LINC00598	lncRNA	646982	Homo sapiens	PAR-CLIP	miRTarBase	22012620	0.5483
RAID01965383	hsa-miR-454-3p	miRNA	MIMAT0003885	Homo sapiens	LINC00339	lncRNA	29092	Homo sapiens	CLIP-seq//Prediction	starBase//miRanda	None	0.6308
RAID01965882	hsa-miR-346	miRNA	MIMAT0000773	Homo sapiens	SERHL	lncRNA	94009	Homo sapiens	Microarray	miRTarBase	16822819	0.5483
RAID01970376	hsa-miR-6839-3p	miRNA	MIMAT0027581	Homo sapiens	LINC00632	lncRNA	286411	Homo sapiens	CLIP-seq	miRTarBase	23824327	0.5483
RAID01970494	hsa-miR-146b-5p	miRNA	MIMAT0002809	Homo sapiens	RPS10P7	lncRNA	376693	Homo sapiens	CLIP-seq//Prediction	starBase//miRanda	None	0.6308
RAID01970585	hsa-miR-5591-5p	miRNA	MIMAT0022301	Homo sapiens	LINC00346	lncRNA	283487	Homo sapiens	CLIP-seq	miRTarBase	23824327	0.5483
RAID01971230	hsa-miR-5196-5p	miRNA	MIMAT0021128	Homo sapiens	XIST	lncRNA	7503	Homo sapiens	CLIP	NPInter	23846593	0.5483
RAID01971432	hsa-miR-758-3p	miRNA	MIMAT0003879	Homo sapiens	DLEU1	lncRNA	10301	Homo sapiens	CLIP-seq//Prediction	starBase//miRanda	None	0.6308
RAID01972073	hsa-miR-106a-5p	miRNA	MIMAT0000103	Homo sapiens	SRGAP3-AS2	lncRNA	100507660	Homo sapiens	CLIP	NPInter	25531890	0.5483
RAID01972726	hsa-miR-4656	miRNA	MIMAT0019723	Homo sapiens	BCYRN1	lncRNA	618	Homo sapiens	CLIP	NPInter	23846593	0.5483
RAID01975265	hsa-miR-5583-5p	miRNA	MIMAT0022281	Homo sapiens	MALAT1	lncRNA	378938	Homo sapiens	CLIP	NPInter	23846593	0.5483
RAID01976699	hsa-miR-1268a	miRNA	MIMAT0005922	Homo sapiens	SNHG3	lncRNA	8420	Homo sapiens	CLIP	NPInter	23846593	0.5483
RAID01978298	hsa-miR-3198	miRNA	MIMAT0015083	Homo sapiens	WT1-AS	lncRNA	51352	Homo sapiens	CLIP	NPInter	23846593	0.5483
RAID01981523	hsa-miR-3978	miRNA	MIMAT0019363	Homo sapiens	XIST	lncRNA	7503	Homo sapiens	CLIP	NPInter	23846593	0.5483
RAID01981607	hsa-miR-1273f	miRNA	MIMAT0020601	Homo sapiens	MALAT1	lncRNA	378938	Homo sapiens	CLIP	NPInter	23846593	0.5483
RAID01983563	hsa-miR-4677-3p	miRNA	MIMAT0019761	Homo sapiens	XIST	lncRNA	7503	Homo sapiens	CLIP	NPInter	23846593	0.5483
RAID01987428	hsa-miR-106a-5p	miRNA	MIMAT0000103	Homo sapiens	FAM41AY1	lncRNA	340618	Homo sapiens	CLIP	NPInter	25531890	0.5483
RAID01987455	hsa-miR-130b-3p	miRNA	MIMAT0000691	Homo sapiens	CRHR1-IT1	lncRNA	147081	Homo sapiens	CLIP-seq//Prediction	starBase//miRanda	None	0.6308
RAID01987601	hsa-miR-940	miRNA	MIMAT0004983	Homo sapiens	DLEU1	lncRNA	10301	Homo sapiens	CLIP-seq	miRTarBase	19536157	0.5483
RAID01987776	hsa-miR-106a-5p	miRNA	MIMAT0000103	Homo sapiens	BCYRN1	lncRNA	618	Homo sapiens	CLIP	NPInter	25531890//23846593	0.5483
RAID01991013	hsa-miR-5589-5p	miRNA	MIMAT0022297	Homo sapiens	LINC00324	lncRNA	284029	Homo sapiens	CLIP	NPInter	23846593	0.5483
RAID01991595	hsa-miR-137	miRNA	MIMAT0000429	Homo sapiens	OIP5-AS1	lncRNA	729082	Homo sapiens	CLIP	NPInter	23846593	0.5483
RAID01992258	hsa-miR-23a-5p	miRNA	MIMAT0004496	Homo sapiens	LINC00324	lncRNA	284029	Homo sapiens	CLIP	NPInter	23846593	0.5483
RAID01993632	hsa-miR-34a-5p	miRNA	MIMAT0000255	Homo sapiens	LINC00341	lncRNA	79686	Homo sapiens	CLIP-seq//Prediction	starBase//miRanda	None	0.6308
RAID01994135	hsa-miR-199a-5p	miRNA	MIMAT0000231	Homo sapiens	LRRC75A-AS1	lncRNA	125144	Homo sapiens	CLIP-seq//Prediction	starBase//miRanda	None	0.6308
RAID01994346	hsa-miR-135a-5p	miRNA	MIMAT0000428	Homo sapiens	LINC00461	lncRNA	645323	Homo sapiens	CLIP//Prediction	NPInter//miRanda	23846593	0.6308
RAID01994623	hsa-miR-23a-3p	miRNA	MIMAT0000078	Homo sapiens	THSD1P1	lncRNA	374500	Homo sapiens	CLIP-seq	starBase	None	0.5483
RAID01995271	hsa-miR-200a-5p	miRNA	MIMAT0001620	Homo sapiens	XIST	lncRNA	7503	Homo sapiens	CLIP	NPInter	23846593	0.5483
RAID01996484	hsa-miR-4538	miRNA	MIMAT0019081	Homo sapiens	BCYRN1	lncRNA	618	Homo sapiens	CLIP	NPInter	23846593	0.5483
RAID01998442	hsa-miR-381-3p	miRNA	MIMAT0000736	Homo sapiens	CTBP1-AS2	lncRNA	92070	Homo sapiens	CLIP-seq//Prediction	starBase//miRanda	None	0.6308
RAID01999335	hsa-miR-433-3p	miRNA	MIMAT0001627	Homo sapiens	LINC00339	lncRNA	29092	Homo sapiens	CLIP-seq//Prediction	starBase//miRanda	None	0.6308
RAID02001432	hsa-miR-130b-3p	miRNA	MIMAT0000691	Homo sapiens	ZNRD1-AS1	lncRNA	80862	Homo sapiens	CLIP-seq//Prediction	starBase//miRanda	None	0.6308
RAID02001455	hsa-miR-424-5p	miRNA	MIMAT0001341	Homo sapiens	EPB41L4A-AS1	lncRNA	114915	Homo sapiens	CLIP-seq//Prediction	starBase//miRanda	None	0.6308
RAID02004206	hsa-miR-186-3p	miRNA	MIMAT0004612	Homo sapiens	MIR22HG	lncRNA	84981	Homo sapiens	CLIP	NPInter	23846593	0.5483
RAID02006652	hsa-miR-497-3p	miRNA	MIMAT0004768	Homo sapiens	XIST	lncRNA	7503	Homo sapiens	CLIP	NPInter	23846593	0.5483
RAID02008873	hsa-miR-423-5p	miRNA	MIMAT0004748	Homo sapiens	BCYRN1	lncRNA	618	Homo sapiens	CLIP	NPInter	23846593	0.5483
RAID02009611	hsa-miR-383-5p	miRNA	MIMAT0000738	Homo sapiens	CRHR1-IT1	lncRNA	147081	Homo sapiens	CLIP-seq//Prediction	starBase//miRanda	None	0.6308
RAID02009700	hsa-miR-3620-5p	miRNA	MIMAT0022967	Homo sapiens	XIST	lncRNA	7503	Homo sapiens	CLIP	NPInter	23846593	0.5483
RAID02010008	hsa-miR-126-5p	miRNA	MIMAT0000444	Homo sapiens	LINC00461	lncRNA	645323	Homo sapiens	CLIP	NPInter	23846593	0.5483
RAID02011066	hsa-miR-301b-3p	miRNA	MIMAT0004958	Homo sapiens	ZNRD1-AS1	lncRNA	80862	Homo sapiens	CLIP-seq//Prediction	starBase//miRanda	None	0.6308
RAID02014152	hsa-miR-24-3p	miRNA	MIMAT0000080	Homo sapiens	LOC389641	lncRNA	389641	Homo sapiens	CLIP-seq//Prediction	starBase//miRanda	None	0.6308
RAID02015139	hsa-miR-372-3p	miRNA	MIMAT0000724	Homo sapiens	LINC00598	lncRNA	646982	Homo sapiens	CLIP-seq	miRTarBase	23313552	0.5483
RAID02016680	hsa-miR-26b-5p	miRNA	MIMAT0000083	Homo sapiens	MCM3AP-AS1	lncRNA	114044	Homo sapiens	CLIP-seq//Prediction	starBase//miRanda	None	0.6308
RAID02016854	hsa-miR-19a-3p	miRNA	MIMAT0000073	Homo sapiens	LINC00339	lncRNA	29092	Homo sapiens	CLIP-seq//Prediction	starBase//miRanda	None	0.6308
RAID02017692	hsa-miR-3664-3p	miRNA	MIMAT0019220	Homo sapiens	MALAT1	lncRNA	378938	Homo sapiens	CLIP	NPInter	23846593	0.5483
RAID02018370	hsa-miR-93-5p	miRNA	MIMAT0000093	Homo sapiens	LINC00472	lncRNA	79940	Homo sapiens	CLIP-seq	starBase	None	0.5483
RAID02019716	hsa-miR-4418	miRNA	MIMAT0018930	Homo sapiens	LINC00598	lncRNA	646982	Homo sapiens	PAR-CLIP	miRTarBase	22100165	0.5483
RAID02019722	hsa-miR-548az-5p	miRNA	MIMAT0025456	Homo sapiens	XIST	lncRNA	7503	Homo sapiens	CLIP	NPInter	23846593	0.5483
RAID02020811	hsa-miR-98-5p	miRNA	MIMAT0000096	Homo sapiens	TTTY15	lncRNA	64595	Homo sapiens	CLIP-seq//Prediction	starBase//miRanda	None	0.6308
RAID02025196	hsa-miR-1273a	miRNA	MIMAT0005926	Homo sapiens	SNHG3	lncRNA	8420	Homo sapiens	CLIP	NPInter	23846593	0.5483
RAID02029162	hsa-miR-142-3p	miRNA	MIMAT0000434	Homo sapiens	TUG1	lncRNA	55000	Homo sapiens	CLIP-seq//Prediction	starBase//miRanda	None	0.6308
RAID02029449	hsa-miR-4768-5p	miRNA	MIMAT0019920	Homo sapiens	BCYRN1	lncRNA	618	Homo sapiens	CLIP	NPInter	23846593	0.5483
RAID02030358	hsa-miR-216a-5p	miRNA	MIMAT0000273	Homo sapiens	DANCR	lncRNA	57291	Homo sapiens	CLIP-seq//Prediction	starBase//miRanda	None	0.6308
RAID02030362	kshv-miR-K12-7-3p	miRNA	MIMAT0002187	Human herpesvirus 8	TUG1	lncRNA	55000	Homo sapiens	PAR-CLIP	ViRBase	22100165	0.5483
RAID02032482	hsa-miR-548ab	miRNA	MIMAT0018928	Homo sapiens	OIP5-AS1	lncRNA	729082	Homo sapiens	CLIP	NPInter	23846593	0.5483
RAID02036353	hsa-miR-6514-3p	miRNA	MIMAT0025485	Homo sapiens	BCYRN1	lncRNA	618	Homo sapiens	CLIP	NPInter	23846593	0.5483
RAID02036617	hsa-miR-429	miRNA	MIMAT0001536	Homo sapiens	OIP5-AS1	lncRNA	729082	Homo sapiens	CLIP//Prediction	NPInter//miRanda	23846593	0.6308
RAID02037565	hsa-miR-1283	miRNA	MIMAT0005799	Homo sapiens	XIST	lncRNA	7503	Homo sapiens	CLIP	NPInter	23846593	0.5483
RAID02037671	mmu-miR-142a-3p	miRNA	MIMAT0000155	Mus musculus	AI504432	lncRNA	229694	Mus musculus	CLIP-seq	starBase	None	0.5483
RAID02038185	hsa-miR-922	miRNA	MIMAT0004972	Homo sapiens	MIR22HG	lncRNA	84981	Homo sapiens	CLIP	NPInter	23846593	0.5483
RAID02038324	hsa-miR-136-5p	miRNA	MIMAT0000448	Homo sapiens	BCYRN1	lncRNA	618	Homo sapiens	CLIP	NPInter	23846593	0.5483
RAID02040285	hsa-miR-15b-5p	miRNA	MIMAT0000417	Homo sapiens	LOC93622	lncRNA	93622	Homo sapiens	CLIP-seq//Prediction	starBase//miRanda	None	0.6308
RAID02045488	hsa-miR-4515	miRNA	MIMAT0019052	Homo sapiens	BCYRN1	lncRNA	618	Homo sapiens	CLIP	NPInter	23846593	0.5483
RAID02045609	hsa-miR-3158-5p	miRNA	MIMAT0019211	Homo sapiens	LINC00598	lncRNA	646982	Homo sapiens	PAR-CLIP	miRTarBase	22100165	0.5483
RAID02046655	hsa-miR-106a-5p	miRNA	MIMAT0000103	Homo sapiens	GS1-124K5.11	lncRNA	493754	Homo sapiens	CLIP	NPInter	25531890	0.5483
RAID02046861	hsa-miR-1228-3p	miRNA	MIMAT0005583	Homo sapiens	BCYRN1	lncRNA	618	Homo sapiens	CLIP	NPInter	23846593	0.5483
RAID02050504	hsa-miR-19a-3p	miRNA	MIMAT0000073	Homo sapiens	PTENP1	lncRNA	11191	Homo sapiens	Reporter Assay//RT-PCR//Western Blot	RAID	20577206	0.9526
RAID02052633	hsa-miR-367-3p	miRNA	MIMAT0000719	Homo sapiens	HNRNPU	lncRNA	3192	Homo sapiens	CLIP	NPInter	23846593	0.5483
RAID02052935	hsa-miR-4715-3p	miRNA	MIMAT0019825	Homo sapiens	GAS5	lncRNA	60674	Homo sapiens	CLIP	NPInter	23846593	0.5483
RAID02054556	hsa-miR-23a-3p	miRNA	MIMAT0000078	Homo sapiens	MCM3AP-AS1	lncRNA	114044	Homo sapiens	CLIP-seq//Prediction	starBase//miRanda	None	0.6308
RAID02054781	hsa-miR-7-1-3p	miRNA	MIMAT0004553	Homo sapiens	XIST	lncRNA	7503	Homo sapiens	CLIP	NPInter	23846593	0.5483
RAID02055441	hsa-miR-186-5p	miRNA	MIMAT0000456	Homo sapiens	LINC00598	lncRNA	646982	Homo sapiens	PAR-CLIP	miRTarBase	20371350//21572407	0.5483
RAID02055508	hsa-miR-320b	miRNA	MIMAT0005792	Homo sapiens	LOC93622	lncRNA	93622	Homo sapiens	CLIP-seq//Prediction	starBase//miRanda	None	0.6308
RAID02055733	hsa-miR-34a-5p	miRNA	MIMAT0000255	Homo sapiens	FOXO3B	lncRNA	2310	Homo sapiens	CLIP-seq	starBase	None	0.5483
RAID02056278	hsa-miR-106b-5p	miRNA	MIMAT0000680	Homo sapiens	PVT1	lncRNA	5820	Homo sapiens	CLIP-seq//Prediction	starBase//miRanda	None	0.6308
RAID02057515	hsa-miR-515-5p	miRNA	MIMAT0002826	Homo sapiens	MALAT1	lncRNA	378938	Homo sapiens	CLIP	NPInter	23846593	0.5483
RAID02057811	hsa-miR-29c-3p	miRNA	MIMAT0000681	Homo sapiens	SNHG20	lncRNA	654434	Homo sapiens	CLIP-seq//Prediction	starBase//miRanda	None	0.6308
RAID02060688	hsa-miR-642a-5p	miRNA	MIMAT0003312	Homo sapiens	LINC00598	lncRNA	646982	Homo sapiens	CLIP-seq	miRTarBase	23824327	0.5483
RAID02061002	hsa-miR-335-3p	miRNA	MIMAT0004703	Homo sapiens	HNRNPU	lncRNA	3192	Homo sapiens	CLIP	NPInter	23846593	0.5483
RAID02061567	hsa-let-7a-5p	miRNA	MIMAT0000062	Homo sapiens	SNHG4	lncRNA	724102	Homo sapiens	CLIP-seq//Prediction	starBase//miRanda	None	0.6308
RAID02061717	hsa-miR-106a-5p	miRNA	MIMAT0000103	Homo sapiens	HOTAIRM1	lncRNA	100506311	Homo sapiens	CLIP	NPInter	25531890	0.5483
RAID02062688	hsa-miR-590-3p	miRNA	MIMAT0004801	Homo sapiens	PTENP1	lncRNA	11191	Homo sapiens	CLIP-seq//Prediction	starBase//miRanda	None	0.6308
RAID02062870	hsa-miR-1236-3p	miRNA	MIMAT0005591	Homo sapiens	XIST	lncRNA	7503	Homo sapiens	CLIP	NPInter	23846593	0.5483
RAID02062914	hsa-miR-335-5p	miRNA	MIMAT0000765	Homo sapiens	LINC00174	lncRNA	285908	Homo sapiens	Microarray	miRTarBase	18185580	0.5483
RAID02064481	mmu-miR-26b-5p	miRNA	MIMAT0000534	Mus musculus	AI504432	lncRNA	229694	Mus musculus	CLIP-seq//Prediction	starBase//miRanda	None	0.6308
RAID02065258	hsa-miR-454-3p	miRNA	MIMAT0003885	Homo sapiens	CRHR1-IT1	lncRNA	147081	Homo sapiens	CLIP-seq//Prediction	starBase//miRanda	None	0.6308
RAID02066072	hsa-miR-766-5p	miRNA	MIMAT0022714	Homo sapiens	XIST	lncRNA	7503	Homo sapiens	CLIP	NPInter	23846593	0.5483
RAID02066106	hsa-miR-5582-5p	miRNA	MIMAT0022279	Homo sapiens	BCYRN1	lncRNA	618	Homo sapiens	CLIP	NPInter	23846593	0.5483
RAID02067639	hsa-miR-19b-1-5p	miRNA	MIMAT0004491	Homo sapiens	XIST	lncRNA	7503	Homo sapiens	CLIP	NPInter	23846593	0.5483
RAID02070382	hsa-miR-325	miRNA	MIMAT0000771	Homo sapiens	BCYRN1	lncRNA	618	Homo sapiens	CLIP	NPInter	23846593	0.5483
RAID02070508	mmu-miR-448-3p	miRNA	MIMAT0001533	Mus musculus	D030047H15Rik	lncRNA	100037396	Mus musculus	CLIP-seq	starBase	None	0.5483
RAID02073584	mmu-miR-291a-5p	miRNA	MIMAT0000367	Mus musculus	Peg3os	lncRNA	100169889	Mus musculus	CLIP-seq	starBase	None	0.5483
RAID02074700	hsa-miR-3913-5p	miRNA	MIMAT0018187	Homo sapiens	LINC00598	lncRNA	646982	Homo sapiens	CLIP-seq	miRTarBase	23824327	0.5483
RAID02078616	hsa-miR-381-5p	miRNA	MIMAT0022862	Homo sapiens	WT1-AS	lncRNA	51352	Homo sapiens	CLIP	NPInter	23846593	0.5483
RAID02079547	hsa-miR-335-5p	miRNA	MIMAT0000765	Homo sapiens	FAM99A	lncRNA	387742	Homo sapiens	Microarray	miRTarBase	18185580	0.5483
RAID02080100	hsa-miR-376c-3p	miRNA	MIMAT0000720	Homo sapiens	LOC730101	lncRNA	730101	Homo sapiens	CLIP-seq//Prediction	starBase//miRanda	None	0.6308
RAID02080435	hsa-miR-17-5p	miRNA	MIMAT0000070	Homo sapiens	PTENP1	lncRNA	11191	Homo sapiens	Reporter Assay//RT-PCR//Western Blot	RAID//MNDR	20577206	0.9526
RAID02082483	hsa-miR-9-5p	miRNA	MIMAT0000441	Homo sapiens	MCM3AP-AS1	lncRNA	114044	Homo sapiens	CLIP-seq//Prediction	starBase//miRanda	None	0.6308
RAID02084694	hsa-miR-106a-5p	miRNA	MIMAT0000103	Homo sapiens	LINC00313	lncRNA	114038	Homo sapiens	CLIP	NPInter	25531890	0.5483
RAID02085125	hsa-miR-130b-3p	miRNA	MIMAT0000691	Homo sapiens	H19	lncRNA	283120	Homo sapiens	CLIP-seq//Prediction	starBase//miRanda	None	0.6308
RAID02085793	hsa-miR-106a-5p	miRNA	MIMAT0000103	Homo sapiens	DNAJC3-AS1	lncRNA	100289274	Homo sapiens	CLIP	NPInter	25531890	0.5483
RAID02086833	hsa-let-7g-5p	miRNA	MIMAT0000414	Homo sapiens	TTTY15	lncRNA	64595	Homo sapiens	CLIP-seq//Prediction	starBase//miRanda	None	0.6308
RAID02087567	hsa-miR-920	miRNA	MIMAT0004970	Homo sapiens	LINC00346	lncRNA	283487	Homo sapiens	CLIP-seq	miRTarBase	23824327	0.5483
RAID02090234	hsa-miR-513c-3p	miRNA	MIMAT0022728	Homo sapiens	BCYRN1	lncRNA	618	Homo sapiens	CLIP	NPInter	23846593	0.5483
RAID02090890	hsa-miR-383-5p	miRNA	MIMAT0000738	Homo sapiens	LINC00472	lncRNA	79940	Homo sapiens	CLIP-seq	starBase	None	0.5483
RAID02092810	hsa-miR-106a-5p	miRNA	MIMAT0000103	Homo sapiens	MED14OS	lncRNA	100873985	Homo sapiens	CLIP	NPInter	25531890	0.5483
RAID02092964	hsa-miR-6074	miRNA	MIMAT0023699	Homo sapiens	LINC00598	lncRNA	646982	Homo sapiens	PAR-CLIP	miRTarBase	20371350	0.5483
RAID02093127	hsa-miR-107	miRNA	MIMAT0000104	Homo sapiens	HULC	lncRNA	728655	Homo sapiens	Reporter Assay//RT-PCR	RAID	26540633	0.8808
RAID02094214	hsa-miR-23a-3p	miRNA	MIMAT0000078	Homo sapiens	LINC00173	lncRNA	100287569	Homo sapiens	CLIP-seq//Prediction	starBase//miRanda	None	0.6308
RAID02094477	hsa-miR-3929	miRNA	MIMAT0018206	Homo sapiens	LINC00598	lncRNA	646982	Homo sapiens	CLIP-seq	miRTarBase	23824327	0.5483
RAID02094566	hsa-miR-30c-1-3p	miRNA	MIMAT0004674	Homo sapiens	LINC00598	lncRNA	646982	Homo sapiens	CLIP-seq	miRTarBase	23824327	0.5483
RAID02096159	hsa-miR-107	miRNA	MIMAT0000104	Homo sapiens	ST7-OT3	lncRNA	93655	Homo sapiens	CLIP-seq//Prediction	starBase//miRanda	None	0.6308
RAID02096167	hsa-miR-542-3p	miRNA	MIMAT0003389	Homo sapiens	OIP5-AS1	lncRNA	729082	Homo sapiens	CLIP	NPInter	23846593	0.5483
RAID02099412	hsa-miR-106a-5p	miRNA	MIMAT0000103	Homo sapiens	SNHG6	lncRNA	641638	Homo sapiens	CLIP	NPInter	25531890	0.5483
RAID02099702	hsa-miR-520d-3p	miRNA	MIMAT0002856	Homo sapiens	THSD1P1	lncRNA	374500	Homo sapiens	CLIP-seq	starBase	None	0.5483
RAID02100376	hsa-miR-106a-5p	miRNA	MIMAT0000103	Homo sapiens	SNHG20	lncRNA	654434	Homo sapiens	CLIP-seq//CLIP//Prediction	NPInter//starBase//miRanda	25531890	0.7226
RAID02103276	hsa-miR-544b	miRNA	MIMAT0015004	Homo sapiens	BCYRN1	lncRNA	618	Homo sapiens	CLIP	NPInter	23846593	0.5483
RAID02103613	hsa-miR-613	miRNA	MIMAT0003281	Homo sapiens	MALAT1	lncRNA	378938	Homo sapiens	CLIP-seq//CLIP//Prediction	NPInter//starBase//miRanda	23846593	0.7226
RAID02106805	hsa-miR-4699-3p	miRNA	MIMAT0019795	Homo sapiens	HNRNPU	lncRNA	3192	Homo sapiens	CLIP	NPInter	23846593	0.5483
RAID02107305	hsa-miR-6506-5p	miRNA	MIMAT0025468	Homo sapiens	MALAT1	lncRNA	378938	Homo sapiens	CLIP	NPInter	23846593	0.5483
RAID02109202	hsa-miR-1273d	miRNA	MIMAT0015090	Homo sapiens	OIP5-AS1	lncRNA	729082	Homo sapiens	CLIP	NPInter	23846593	0.5483
RAID02112333	hsa-miR-106a-5p	miRNA	MIMAT0000103	Homo sapiens	THAP7-AS1	lncRNA	439931	Homo sapiens	CLIP//Prediction	NPInter//miRanda	25531890	0.6308
RAID02112463	hsa-miR-141-3p	miRNA	MIMAT0000432	Homo sapiens	MEG3	lncRNA	55384	Homo sapiens	RT-PCR	RAID	26233544	0.7311
RAID02114606	hsa-miR-150-5p	miRNA	MIMAT0000451	Homo sapiens	LOC645166	lncRNA	645166	Homo sapiens	CLIP-seq//Prediction	starBase//miRanda	None	0.6308
RAID02115806	hsa-miR-3187-5p	miRNA	MIMAT0019216	Homo sapiens	BCYRN1	lncRNA	618	Homo sapiens	CLIP	NPInter	23846593	0.5483
RAID02116228	hsa-miR-378a-5p	miRNA	MIMAT0000731	Homo sapiens	DLEU1	lncRNA	10301	Homo sapiens	CLIP-seq	miRTarBase	23824327	0.5483
RAID02119206	hsa-miR-106a-5p	miRNA	MIMAT0000103	Homo sapiens	LINC00520	lncRNA	645687	Homo sapiens	CLIP	NPInter	25531890	0.5483
RAID02120162	hsa-miR-6735-3p	miRNA	MIMAT0027372	Homo sapiens	LINC00598	lncRNA	646982	Homo sapiens	CLIP-seq	miRTarBase	19536157	0.5483
RAID02127427	hsa-miR-138-5p	miRNA	MIMAT0000430	Homo sapiens	CTBP1-AS2	lncRNA	92070	Homo sapiens	CLIP-seq//Prediction	starBase//miRanda	None	0.6308
RAID02135428	hsa-miR-4711-5p	miRNA	MIMAT0019816	Homo sapiens	BCYRN1	lncRNA	618	Homo sapiens	CLIP	NPInter	23846593	0.5483
RAID02135825	hsa-miR-20b-5p	miRNA	MIMAT0001413	Homo sapiens	HCP5	lncRNA	10866	Homo sapiens	CLIP-seq//Prediction	miRTarBase//miRanda	22473208	0.6308
RAID02139180	hsa-miR-382-5p	miRNA	MIMAT0000737	Homo sapiens	LOC730101	lncRNA	730101	Homo sapiens	CLIP-seq//Prediction	starBase//miRanda	None	0.6308
RAID02140311	hsa-miR-4428	miRNA	MIMAT0018943	Homo sapiens	XIST	lncRNA	7503	Homo sapiens	CLIP	NPInter	23846593	0.5483
RAID02141220	hsa-miR-30e-5p	miRNA	MIMAT0000692	Homo sapiens	CTBP1-AS2	lncRNA	92070	Homo sapiens	CLIP-seq//Prediction	starBase//miRanda	None	0.6308
RAID02141246	hsa-miR-19a-3p	miRNA	MIMAT0000073	Homo sapiens	H19	lncRNA	283120	Homo sapiens	CLIP-seq//Prediction	starBase//miRanda	None	0.6308
RAID02142097	hsa-miR-323b-5p	miRNA	MIMAT0001630	Homo sapiens	HNRNPU	lncRNA	3192	Homo sapiens	CLIP	NPInter	23846593	0.5483
RAID02146176	hsa-miR-146a-3p	miRNA	MIMAT0004608	Homo sapiens	BCYRN1	lncRNA	618	Homo sapiens	CLIP	NPInter	23846593	0.5483
RAID02146615	hsa-miR-5684	miRNA	MIMAT0022473	Homo sapiens	BCYRN1	lncRNA	618	Homo sapiens	CLIP	NPInter	23846593	0.5483
RAID02146959	hsa-miR-383-3p	miRNA	MIMAT0026485	Homo sapiens	LINC00346	lncRNA	283487	Homo sapiens	CLIP-seq	miRTarBase	23824327	0.5483
RAID02147082	hsa-miR-15b-5p	miRNA	MIMAT0000417	Homo sapiens	MCM3AP-AS1	lncRNA	114044	Homo sapiens	CLIP-seq//Prediction	miRTarBase//starBase//miRanda	22473208	0.6308
RAID02148131	hsa-miR-3934-5p	miRNA	MIMAT0018349	Homo sapiens	MIR22HG	lncRNA	84981	Homo sapiens	CLIP	NPInter	23846593	0.5483
RAID02149714	hsa-miR-93-5p	miRNA	MIMAT0000093	Homo sapiens	OIP5-AS1	lncRNA	729082	Homo sapiens	CLIP//Prediction	NPInter//miRanda	23846593	0.6308
RAID02152285	hsa-miR-130b-3p	miRNA	MIMAT0000691	Homo sapiens	FAM201A	lncRNA	158228	Homo sapiens	CLIP-seq//Prediction	starBase//miRanda	None	0.6308
RAID02153850	hsa-miR-382-5p	miRNA	MIMAT0000737	Homo sapiens	PTENP1	lncRNA	11191	Homo sapiens	CLIP-seq//Prediction	starBase//miRanda	None	0.6308
RAID02154418	hsa-miR-202-3p	miRNA	MIMAT0002811	Homo sapiens	HCP5	lncRNA	10866	Homo sapiens	CLIP-seq	starBase	None	0.5483
RAID02155818	hsa-miR-1285-5p	miRNA	MIMAT0022719	Homo sapiens	OIP5-AS1	lncRNA	729082	Homo sapiens	CLIP	NPInter	23846593	0.5483
RAID02157972	hsa-miR-4644	miRNA	MIMAT0019704	Homo sapiens	XIST	lncRNA	7503	Homo sapiens	CLIP	NPInter	23846593	0.5483
RAID02158086	hsa-miR-106a-5p	miRNA	MIMAT0000103	Homo sapiens	ZNF883	lncRNA	169834	Homo sapiens	CLIP	NPInter	25531890	0.5483
RAID02161266	hsa-miR-20a-5p	miRNA	MIMAT0000075	Homo sapiens	PTENP1	lncRNA	11191	Homo sapiens	CLIP-seq//Prediction	ncRDeathDB2.0//starBase//miRanda	25617127	0.6308
RAID02161809	hsa-miR-3664-3p	miRNA	MIMAT0019220	Homo sapiens	LINC00598	lncRNA	646982	Homo sapiens	CLIP-seq	miRTarBase	23824327	0.5483
RAID02163671	hsa-let-7f-5p	miRNA	MIMAT0000067	Homo sapiens	HOXA11-AS	lncRNA	221883	Homo sapiens	CLIP-seq//Prediction	starBase//miRanda	None	0.6308
RAID02166243	hsa-miR-371a-5p	miRNA	MIMAT0004687	Homo sapiens	PTENP1	lncRNA	11191	Homo sapiens	RT-PCR	miRTarBase	24367666	0.7311
RAID02166852	hsa-miR-106a-5p	miRNA	MIMAT0000103	Homo sapiens	LINC00337	lncRNA	148645	Homo sapiens	CLIP//Prediction	NPInter//miRanda	25531890	0.6308
RAID02167403	hsa-miR-454-3p	miRNA	MIMAT0003885	Homo sapiens	MIR17HG	lncRNA	407975	Homo sapiens	CLIP-seq//Prediction	starBase//miRanda	None	0.6308
RAID02167774	hsa-miR-5003-5p	miRNA	MIMAT0021025	Homo sapiens	MIR155HG	lncRNA	114614	Homo sapiens	CLIP	NPInter	23846593	0.5483
RAID02168146	hsa-miR-3692-5p	miRNA	MIMAT0018121	Homo sapiens	HNRNPU	lncRNA	3192	Homo sapiens	CLIP	NPInter	23846593	0.5483
RAID02169612	hsa-miR-554	miRNA	MIMAT0003217	Homo sapiens	OIP5-AS1	lncRNA	729082	Homo sapiens	CLIP	NPInter	23846593	0.5483
RAID02170055	mmu-miR-183-5p	miRNA	MIMAT0000212	Mus musculus	AI504432	lncRNA	229694	Mus musculus	CLIP-seq	starBase	None	0.5483
RAID02171148	hsa-miR-4311	miRNA	MIMAT0016863	Homo sapiens	OIP5-AS1	lncRNA	729082	Homo sapiens	CLIP	NPInter	23846593	0.5483
RAID02172506	hsa-miR-323b-5p	miRNA	MIMAT0001630	Homo sapiens	PI4KAP1	lncRNA	728233	Homo sapiens	CLIP-seq	starBase	None	0.5483
RAID02173797	hsa-miR-376c-3p	miRNA	MIMAT0000720	Homo sapiens	HCG11	lncRNA	493812	Homo sapiens	CLIP-seq//Prediction	starBase//miRanda	None	0.6308
RAID02174219	hsa-miR-524-5p	miRNA	MIMAT0002849	Homo sapiens	BCYRN1	lncRNA	618	Homo sapiens	CLIP	NPInter	23846593	0.5483
RAID02176016	hsa-miR-6503-3p	miRNA	MIMAT0025463	Homo sapiens	SNHG1	lncRNA	23642	Homo sapiens	CLIP	NPInter	23846593	0.5483
RAID02178135	hsa-miR-301b-3p	miRNA	MIMAT0004958	Homo sapiens	FAM201A	lncRNA	158228	Homo sapiens	CLIP-seq//Prediction	starBase//miRanda	None	0.6308
RAID02178467	hsa-miR-204-3p	miRNA	MIMAT0022693	Homo sapiens	BCYRN1	lncRNA	618	Homo sapiens	CLIP	NPInter	23846593	0.5483
RAID02178471	hsa-miR-342-3p	miRNA	MIMAT0000753	Homo sapiens	H19	lncRNA	283120	Homo sapiens	CLIP-seq//Prediction	starBase//miRanda	None	0.6308
RAID02179415	hsa-miR-186-5p	miRNA	MIMAT0000456	Homo sapiens	ST7-OT3	lncRNA	93655	Homo sapiens	CLIP-seq//Prediction	starBase//miRanda	None	0.6308
RAID02179456	mmu-miR-101a-3p	miRNA	MIMAT0000133	Mus musculus	AI504432	lncRNA	229694	Mus musculus	CLIP-seq//Prediction	starBase//miRanda	None	0.6308
RAID02180312	hsa-miR-429	miRNA	MIMAT0001536	Homo sapiens	SUZ12P1	lncRNA	440423	Homo sapiens	CLIP-seq//Prediction	starBase//miRanda	None	0.6308
RAID02180579	hsa-miR-942-5p	miRNA	MIMAT0004985	Homo sapiens	BCYRN1	lncRNA	618	Homo sapiens	CLIP	NPInter	23846593	0.5483
RAID02182116	hsa-miR-5787	miRNA	MIMAT0023252	Homo sapiens	XIST	lncRNA	7503	Homo sapiens	CLIP	NPInter	23846593	0.5483
RAID02182633	hsa-miR-3159	miRNA	MIMAT0015033	Homo sapiens	BCYRN1	lncRNA	618	Homo sapiens	CLIP	NPInter	23846593	0.5483
RAID02183123	hsa-miR-4673	miRNA	MIMAT0019755	Homo sapiens	LINC00598	lncRNA	646982	Homo sapiens	PAR-CLIP	miRTarBase	20371350	0.5483
RAID02183197	hsa-miR-19b-2-5p	miRNA	MIMAT0004492	Homo sapiens	MALAT1	lncRNA	378938	Homo sapiens	CLIP	NPInter	23846593	0.5483
RAID02183400	hsa-miR-497-5p	miRNA	MIMAT0002820	Homo sapiens	LINC00339	lncRNA	29092	Homo sapiens	CLIP-seq//Prediction	starBase//miRanda	None	0.6308
RAID02185508	kshv-miR-K12-2-5p	miRNA	MIMAT0002183	Human herpesvirus 8	FOXO3B	lncRNA	2310	Homo sapiens	PAR-CLIP	ViRBase	22100165	0.5483
RAID02186274	hsa-miR-6776-3p	miRNA	MIMAT0027453	Homo sapiens	LINC00598	lncRNA	646982	Homo sapiens	PAR-CLIP	miRTarBase	23592263	0.5483
RAID02188275	hsa-miR-29b-3p	miRNA	MIMAT0000100	Homo sapiens	BREA2	lncRNA	286076	Homo sapiens	CLIP-seq//Prediction	starBase//miRanda	None	0.6308
RAID02188606	hsa-miR-7854-3p	miRNA	MIMAT0030429	Homo sapiens	PAPPA-AS1	lncRNA	493913	Homo sapiens	CLIP-seq	miRTarBase	23824327	0.5483
RAID02195194	hsa-miR-526a	miRNA	MIMAT0002845	Homo sapiens	XIST	lncRNA	7503	Homo sapiens	CLIP	NPInter	23846593	0.5483
RAID02195673	hsa-miR-320d	miRNA	MIMAT0006764	Homo sapiens	LOC389641	lncRNA	389641	Homo sapiens	CLIP-seq//Prediction	starBase//miRanda	None	0.6308
RAID02199520	hsa-miR-3140-3p	miRNA	MIMAT0015008	Homo sapiens	LINC00598	lncRNA	646982	Homo sapiens	CLIP-seq	miRTarBase	19536157	0.5483
RAID02199837	hsa-miR-1260a	miRNA	MIMAT0005911	Homo sapiens	XIST	lncRNA	7503	Homo sapiens	CLIP	NPInter	23846593	0.5483
RAID02201241	hsa-miR-767-5p	miRNA	MIMAT0003882	Homo sapiens	LINC00632	lncRNA	286411	Homo sapiens	CLIP-seq	miRTarBase	23313552	0.5483
RAID02202945	hsa-miR-6872-3p	miRNA	MIMAT0027645	Homo sapiens	LINC00632	lncRNA	286411	Homo sapiens	CLIP-seq	miRTarBase	23313552	0.5483
RAID02203297	hsa-miR-4758-5p	miRNA	MIMAT0019903	Homo sapiens	XIST	lncRNA	7503	Homo sapiens	CLIP	NPInter	23846593	0.5483
RAID02203804	hsa-miR-520c-3p	miRNA	MIMAT0002846	Homo sapiens	THSD1P1	lncRNA	374500	Homo sapiens	CLIP-seq	starBase	None	0.5483
RAID02205936	hsa-miR-106a-5p	miRNA	MIMAT0000103	Homo sapiens	MIR181A2HG	lncRNA	100379345	Homo sapiens	CLIP	NPInter	25531890	0.5483
RAID02207039	hsa-miR-3149	miRNA	MIMAT0015022	Homo sapiens	LINC00632	lncRNA	286411	Homo sapiens	CLIP-seq	miRTarBase	23313552	0.5483
RAID02208479	hsa-miR-424-5p	miRNA	MIMAT0001341	Homo sapiens	HNRNPU	lncRNA	3192	Homo sapiens	CLIP	NPInter	23846593	0.5483
RAID02208518	hsa-miR-371a-3p	miRNA	MIMAT0000723	Homo sapiens	BCYRN1	lncRNA	618	Homo sapiens	CLIP	NPInter	23846593	0.5483
RAID02208743	hsa-miR-502-5p	miRNA	MIMAT0002873	Homo sapiens	THSD1P1	lncRNA	374500	Homo sapiens	CLIP-seq	starBase	None	0.5483
RAID02209504	ebv-miR-BART2-5p	miRNA	MIMAT0001000	Human herpesvirus 4	EFCAB14-AS1	lncRNA	100130197	Homo sapiens	PAR-CLIP	ViRBase	22291592	0.5483
RAID02209627	hsa-miR-4485-5p	miRNA	MIMAT0032116	Homo sapiens	LINC00598	lncRNA	646982	Homo sapiens	CLIP-seq	miRTarBase	23824327	0.5483
RAID02209657	hsa-miR-326	miRNA	MIMAT0000756	Homo sapiens	ST7-OT3	lncRNA	93655	Homo sapiens	CLIP-seq//Prediction	starBase//miRanda	None	0.6308
RAID02210299	mmu-miR-92a-3p	miRNA	MIMAT0000539	Mus musculus	6330403K07Rik	lncRNA	103712	Mus musculus	CLIP-seq	starBase	None	0.5483
RAID02213695	hsa-miR-106a-5p	miRNA	MIMAT0000103	Homo sapiens	MEIS1-AS3	lncRNA	730198	Homo sapiens	CLIP	NPInter	25531890	0.5483
RAID02217911	hsa-miR-130a-3p	miRNA	MIMAT0000425	Homo sapiens	CRHR1-IT1	lncRNA	147081	Homo sapiens	CLIP-seq//Prediction	starBase//miRanda	None	0.6308
RAID02219088	mmu-miR-499-5p	miRNA	MIMAT0003482	Mus musculus	B930036N10Rik	lncRNA	100048917	Mus musculus	CLIP-seq	starBase	None	0.5483
RAID02224491	hsa-miR-106a-5p	miRNA	MIMAT0000103	Homo sapiens	LINC00341	lncRNA	79686	Homo sapiens	CLIP	NPInter	25531890	0.5483
RAID02227146	hsa-miR-3620-5p	miRNA	MIMAT0022967	Homo sapiens	MIR137HG	lncRNA	400765	Homo sapiens	CLIP	NPInter	23846593	0.5483
RAID02228047	hsa-miR-1238-3p	miRNA	MIMAT0005593	Homo sapiens	WT1-AS	lncRNA	51352	Homo sapiens	CLIP	NPInter	23846593	0.5483
RAID02229420	hsa-miR-154-5p	miRNA	MIMAT0000452	Homo sapiens	SNHG11	lncRNA	128439	Homo sapiens	CLIP-seq//Prediction	starBase//miRanda	None	0.6308
RAID02231732	mmu-miR-218-5p	miRNA	MIMAT0000663	Mus musculus	AI504432	lncRNA	229694	Mus musculus	CLIP-seq//Prediction	starBase//miRanda	None	0.6308
RAID02233775	hsa-miR-1226-5p	miRNA	MIMAT0005576	Homo sapiens	BCYRN1	lncRNA	618	Homo sapiens	CLIP	NPInter	23846593	0.5483
RAID02233867	hsa-miR-3164	miRNA	MIMAT0015038	Homo sapiens	XIST	lncRNA	7503	Homo sapiens	CLIP	NPInter	23846593	0.5483
RAID02234879	hsa-miR-197-5p	miRNA	MIMAT0022691	Homo sapiens	BCYRN1	lncRNA	618	Homo sapiens	CLIP	NPInter	23846593	0.5483
RAID02240633	hsa-miR-186-5p	miRNA	MIMAT0000456	Homo sapiens	LINC00346	lncRNA	283487	Homo sapiens	PAR-CLIP	miRTarBase	20371350	0.5483
RAID02240843	mmu-miR-34a-5p	miRNA	MIMAT0000542	Mus musculus	Rab10os	lncRNA	74173	Mus musculus	CLIP-seq//Prediction	starBase//miRanda	None	0.6308
RAID02242121	hsa-miR-1224-5p	miRNA	MIMAT0005458	Homo sapiens	WT1-AS	lncRNA	51352	Homo sapiens	CLIP	NPInter	23846593	0.5483
RAID02242590	hsa-miR-146a-5p	miRNA	MIMAT0000449	Homo sapiens	LINC00304	lncRNA	283860	Homo sapiens	Microarray	miRTarBase	18057241	0.5483
RAID02243000	hsa-miR-96-5p	miRNA	MIMAT0000095	Homo sapiens	LINC00173	lncRNA	100287569	Homo sapiens	CLIP-seq//Prediction	starBase//miRanda	None	0.6308
RAID02244741	hsa-miR-485-5p	miRNA	MIMAT0002175	Homo sapiens	SNHG20	lncRNA	654434	Homo sapiens	CLIP-seq//Prediction	starBase//miRanda	None	0.6308
RAID02246354	hsa-miR-4281	miRNA	MIMAT0016907	Homo sapiens	WT1-AS	lncRNA	51352	Homo sapiens	CLIP	NPInter	23846593	0.5483
RAID02249574	hsa-miR-320a	miRNA	MIMAT0000510	Homo sapiens	LINC00162	lncRNA	378825	Homo sapiens	Reporter Assay//Northern Blot//RT-PCR	RAID	26539909	0.9526
RAID02251348	hsa-miR-548aa	miRNA	MIMAT0018447	Homo sapiens	OIP5-AS1	lncRNA	729082	Homo sapiens	CLIP	NPInter	23846593	0.5483
RAID02253030	hsa-miR-518c-5p	miRNA	MIMAT0002847	Homo sapiens	XIST	lncRNA	7503	Homo sapiens	CLIP	NPInter	23846593	0.5483
RAID02254440	hsa-miR-4758-3p	miRNA	MIMAT0019904	Homo sapiens	BCYRN1	lncRNA	618	Homo sapiens	CLIP	NPInter	23846593	0.5483
RAID02255674	hsa-miR-548a-3p	miRNA	MIMAT0003251	Homo sapiens	WT1-AS	lncRNA	51352	Homo sapiens	CLIP	NPInter	23846593	0.5483
RAID02255899	hsa-miR-524-5p	miRNA	MIMAT0002849	Homo sapiens	LINC00461	lncRNA	645323	Homo sapiens	CLIP	NPInter	23846593	0.5483
RAID02260312	hsa-miR-143-3p	miRNA	MIMAT0000435	Homo sapiens	BCYRN1	lncRNA	618	Homo sapiens	CLIP	NPInter	23846593	0.5483
RAID02260335	hsa-miR-4667-5p	miRNA	MIMAT0019743	Homo sapiens	OIP5-AS1	lncRNA	729082	Homo sapiens	CLIP	NPInter	23846593	0.5483
RAID02263501	hsa-miR-613	miRNA	MIMAT0003281	Homo sapiens	LINC00869	lncRNA	57234	Homo sapiens	CLIP-seq//Prediction	starBase//miRanda	None	0.6308
RAID02264186	hsa-miR-106a-5p	miRNA	MIMAT0000103	Homo sapiens	LINC00854	lncRNA	100874261	Homo sapiens	CLIP	NPInter	25531890	0.5483
RAID02264695	hsa-miR-4679	miRNA	MIMAT0019763	Homo sapiens	BCYRN1	lncRNA	618	Homo sapiens	CLIP	NPInter	23846593	0.5483
RAID02264872	hsa-miR-30c-1-3p	miRNA	MIMAT0004674	Homo sapiens	LINC00346	lncRNA	283487	Homo sapiens	CLIP-seq	miRTarBase	23824327	0.5483
RAID02265986	hsa-miR-130b-3p	miRNA	MIMAT0000691	Homo sapiens	BCYRN1	lncRNA	618	Homo sapiens	CLIP	NPInter	23846593	0.5483
RAID02266491	hsa-miR-3929	miRNA	MIMAT0018206	Homo sapiens	LINC00346	lncRNA	283487	Homo sapiens	CLIP-seq	miRTarBase	23824327	0.5483
RAID02268828	hsa-miR-3913-5p	miRNA	MIMAT0018187	Homo sapiens	LINC00346	lncRNA	283487	Homo sapiens	CLIP-seq	miRTarBase	23824327	0.5483
RAID02269482	hsa-miR-1-3p	miRNA	MIMAT0000416	Homo sapiens	MGC27345	lncRNA	157247	Homo sapiens	Microarray	miRTarBase	15685193	0.5483
RAID02269673	hsa-miR-578	miRNA	MIMAT0003243	Homo sapiens	LINC00598	lncRNA	646982	Homo sapiens	PAR-CLIP	miRTarBase	22100165	0.5483
RAID02270490	hsa-miR-4684-5p	miRNA	MIMAT0019769	Homo sapiens	LINC00346	lncRNA	283487	Homo sapiens	CLIP-seq	miRTarBase	23313552	0.5483
RAID02271771	hsa-miR-524-3p	miRNA	MIMAT0002850	Homo sapiens	ST20-AS1	lncRNA	283687	Homo sapiens	CLIP-seq	starBase	None	0.5483
RAID02273123	hsa-miR-106a-5p	miRNA	MIMAT0000103	Homo sapiens	NAV2-AS5	lncRNA	100874012	Homo sapiens	CLIP	NPInter	25531890	0.5483
RAID02274881	hsa-miR-3187-5p	miRNA	MIMAT0019216	Homo sapiens	OIP5-AS1	lncRNA	729082	Homo sapiens	CLIP	NPInter	23846593	0.5483
RAID02281932	hsa-miR-3622b-3p	miRNA	MIMAT0018006	Homo sapiens	BCYRN1	lncRNA	618	Homo sapiens	CLIP	NPInter	23846593	0.5483
RAID02282499	hsa-miR-335-3p	miRNA	MIMAT0004703	Homo sapiens	LINC00598	lncRNA	646982	Homo sapiens	CLIP-seq	miRTarBase	19536157	0.5483
RAID02283437	hsa-miR-23a-3p	miRNA	MIMAT0000078	Homo sapiens	TOP1P2	lncRNA	7152	Homo sapiens	CLIP-seq//Prediction	starBase//miRanda	None	0.6308
RAID02283725	hsa-miR-106a-5p	miRNA	MIMAT0000103	Homo sapiens	LINC00852	lncRNA	84657	Homo sapiens	CLIP	NPInter	25531890	0.5483
RAID02287159	hsa-miR-196a-5p	miRNA	MIMAT0000226	Homo sapiens	TUG1	lncRNA	55000	Homo sapiens	CLIP-seq//Prediction	starBase//miRanda	None	0.6308
RAID02289493	hsa-miR-92b-3p	miRNA	MIMAT0003218	Homo sapiens	MALAT1	lncRNA	378938	Homo sapiens	CLIP	NPInter	23846593	0.5483
RAID02290771	hsa-miR-542-3p	miRNA	MIMAT0003389	Homo sapiens	HNRNPU	lncRNA	3192	Homo sapiens	CLIP	NPInter	23846593	0.5483
RAID02291534	hsa-miR-548aq-5p	miRNA	MIMAT0022263	Homo sapiens	XIST	lncRNA	7503	Homo sapiens	CLIP	NPInter	23846593	0.5483
RAID02293613	hsa-miR-1207-5p	miRNA	MIMAT0005871	Homo sapiens	XIST	lncRNA	7503	Homo sapiens	CLIP	NPInter	23846593	0.5483
RAID02293771	hsa-miR-4667-3p	miRNA	MIMAT0019744	Homo sapiens	MALAT1	lncRNA	378938	Homo sapiens	CLIP	NPInter	23846593	0.5483
RAID02297161	hsa-miR-4644	miRNA	MIMAT0019704	Homo sapiens	MALAT1	lncRNA	378938	Homo sapiens	CLIP	NPInter	23846593	0.5483
RAID02300638	hsa-miR-146a-5p	miRNA	MIMAT0000449	Homo sapiens	MCM3AP-AS1	lncRNA	114044	Homo sapiens	CLIP-seq	starBase	None	0.5483
RAID02301045	hsa-miR-211-3p	miRNA	MIMAT0022694	Homo sapiens	XIST	lncRNA	7503	Homo sapiens	CLIP	NPInter	23846593	0.5483
RAID02301372	hsa-miR-373-5p	miRNA	MIMAT0000725	Homo sapiens	OIP5-AS1	lncRNA	729082	Homo sapiens	CLIP	NPInter	23846593	0.5483
RAID02301553	hsa-miR-4761-3p	miRNA	MIMAT0019909	Homo sapiens	BCYRN1	lncRNA	618	Homo sapiens	CLIP	NPInter	23846593	0.5483
RAID02304154	hsa-miR-6834-5p	miRNA	MIMAT0027568	Homo sapiens	LINC00598	lncRNA	646982	Homo sapiens	PAR-CLIP	miRTarBase	23592263	0.5483
RAID02306547	hsa-miR-1273g-3p	miRNA	MIMAT0022742	Homo sapiens	OIP5-AS1	lncRNA	729082	Homo sapiens	CLIP	NPInter	23846593	0.5483
RAID02308092	hsa-miR-194-3p	miRNA	MIMAT0004671	Homo sapiens	OIP5-AS1	lncRNA	729082	Homo sapiens	CLIP	NPInter	23846593	0.5483
RAID02308790	hsa-miR-20a-5p	miRNA	MIMAT0000075	Homo sapiens	LINC00598	lncRNA	646982	Homo sapiens	CLIP-seq	miRTarBase	23313552	0.5483
RAID02309165	hsa-miR-106a-5p	miRNA	MIMAT0000103	Homo sapiens	SNHG11	lncRNA	128439	Homo sapiens	CLIP	NPInter	25531890	0.5483
RAID02311562	hsa-miR-193b-3p	miRNA	MIMAT0002819	Homo sapiens	MIR31HG	lncRNA	554202	Homo sapiens	RIP (RNA Immunoprecipitation)//Reporter Assay//RT-PCR	RAID	26549028	0.9526
RAID02314790	hsa-miR-3663-5p	miRNA	MIMAT0018084	Homo sapiens	MALAT1	lncRNA	378938	Homo sapiens	CLIP	NPInter	23846593	0.5483
RAID02321047	hsa-miR-6514-5p	miRNA	MIMAT0025484	Homo sapiens	XIST	lncRNA	7503	Homo sapiens	CLIP	NPInter	23846593	0.5483
RAID02321646	hsa-miR-376b-3p	miRNA	MIMAT0002172	Homo sapiens	RPS10P7	lncRNA	376693	Homo sapiens	CLIP-seq	starBase	None	0.5483
RAID02322491	hsa-miR-1255b-2-3p	miRNA	MIMAT0022725	Homo sapiens	MALAT1	lncRNA	378938	Homo sapiens	CLIP	NPInter	23846593	0.5483
RAID02323423	mmu-miR-298-5p	miRNA	MIMAT0000376	Mus musculus	Rab10os	lncRNA	74173	Mus musculus	CLIP-seq	starBase	None	0.5483
RAID02326060	hsa-miR-1252-5p	miRNA	MIMAT0005944	Homo sapiens	MALAT1	lncRNA	378938	Homo sapiens	CLIP	NPInter	23846593	0.5483
RAID02326874	hsa-miR-9-5p	miRNA	MIMAT0000441	Homo sapiens	LOC730101	lncRNA	730101	Homo sapiens	CLIP-seq//Prediction	starBase//miRanda	None	0.6308
RAID02328564	hsa-miR-106a-5p	miRNA	MIMAT0000103	Homo sapiens	LINC00152	lncRNA	112597	Homo sapiens	CLIP	NPInter	25531890	0.5483
RAID02330740	hsa-miR-603	miRNA	MIMAT0003271	Homo sapiens	HNRNPU	lncRNA	3192	Homo sapiens	CLIP	NPInter	23846593	0.5483
RAID02331046	hsa-miR-424-5p	miRNA	MIMAT0001341	Homo sapiens	CTBP1-AS2	lncRNA	92070	Homo sapiens	CLIP-seq//Prediction	starBase//miRanda	None	0.6308
RAID02331835	hsa-miR-196b-5p	miRNA	MIMAT0001080	Homo sapiens	SNHG4	lncRNA	724102	Homo sapiens	CLIP-seq//Prediction	starBase//miRanda	None	0.6308
RAID02333337	hsa-miR-106a-5p	miRNA	MIMAT0000103	Homo sapiens	SNHG5	lncRNA	387066	Homo sapiens	CLIP	NPInter	25531890	0.5483
RAID02337068	mmu-mir-130a	miRNA	MI0000156	Mus musculus	Trp53cor1	lncRNA	100504267	Mus musculus	Chromatography technology	NPInter	22813890	0.7311
RAID02338690	mmu-miR-106b-5p	miRNA	MIMAT0000386	Mus musculus	BC029722	lncRNA	613262	Mus musculus	CLIP-seq	starBase	None	0.5483
RAID02339840	hsa-miR-106a-5p	miRNA	MIMAT0000103	Homo sapiens	ZNRD1-AS1	lncRNA	80862	Homo sapiens	CLIP	NPInter	25531890	0.5483
RAID02340051	hsa-miR-299-3p	miRNA	MIMAT0000687	Homo sapiens	TUG1	lncRNA	55000	Homo sapiens	CLIP-seq//Prediction	starBase//miRanda	None	0.6308
RAID02340615	hsa-miR-449a	miRNA	MIMAT0001541	Homo sapiens	LOC645166	lncRNA	645166	Homo sapiens	CLIP-seq//Prediction	starBase//miRanda	None	0.6308
RAID02341753	hsa-miR-1224-3p	miRNA	MIMAT0005459	Homo sapiens	BCYRN1	lncRNA	618	Homo sapiens	CLIP	NPInter	23846593	0.5483
RAID02343813	hsa-miR-106a-5p	miRNA	MIMAT0000103	Homo sapiens	PVT1	lncRNA	5820	Homo sapiens	CLIP-seq//CLIP//Prediction	NPInter//starBase//miRanda	25531890	0.7226
RAID02345548	hsa-miR-3135b	miRNA	MIMAT0018985	Homo sapiens	MIR22HG	lncRNA	84981	Homo sapiens	CLIP	NPInter	23846593	0.5483
RAID02348682	hsa-miR-518c-5p	miRNA	MIMAT0002847	Homo sapiens	DGCR5	lncRNA	26220	Homo sapiens	CLIP-seq	starBase	None	0.5483
RAID02351116	hsa-miR-1587	miRNA	MIMAT0019077	Homo sapiens	MIR137HG	lncRNA	400765	Homo sapiens	CLIP	NPInter	23846593	0.5483
RAID02351479	hsa-miR-519a-3p	miRNA	MIMAT0002869	Homo sapiens	FAM13A-AS1	lncRNA	285512	Homo sapiens	CLIP-seq	starBase	None	0.5483
RAID02353745	hsa-miR-892b	miRNA	MIMAT0004918	Homo sapiens	SNHG3	lncRNA	8420	Homo sapiens	CLIP	NPInter	23846593	0.5483
RAID02355929	hsa-miR-4469	miRNA	MIMAT0018996	Homo sapiens	LINC00598	lncRNA	646982	Homo sapiens	CLIP-seq	miRTarBase	23824327	0.5483
RAID02358799	hsa-miR-106a-5p	miRNA	MIMAT0000103	Homo sapiens	FTX	lncRNA	100302692	Homo sapiens	CLIP	NPInter	25531890	0.5483
RAID02358857	hsa-miR-937-5p	miRNA	MIMAT0022938	Homo sapiens	BCYRN1	lncRNA	618	Homo sapiens	CLIP	NPInter	23846593	0.5483
RAID02362907	hsa-miR-125a-3p	miRNA	MIMAT0004602	Homo sapiens	DLEU1	lncRNA	10301	Homo sapiens	CLIP-seq	miRTarBase	23824327	0.5483
RAID02363784	hsa-miR-106a-5p	miRNA	MIMAT0000103	Homo sapiens	LINC00476	lncRNA	100128782	Homo sapiens	CLIP	NPInter	25531890	0.5483
RAID02368133	hsa-miR-106a-5p	miRNA	MIMAT0000103	Homo sapiens	FOXP1-IT1	lncRNA	100506815	Homo sapiens	CLIP	NPInter	25531890	0.5483
RAID02368187	hsa-miR-106a-5p	miRNA	MIMAT0000103	Homo sapiens	LIFR-AS1	lncRNA	100506495	Homo sapiens	CLIP	NPInter	25531890	0.5483
RAID02368974	hsa-miR-4673	miRNA	MIMAT0019755	Homo sapiens	LINC00346	lncRNA	283487	Homo sapiens	PAR-CLIP	miRTarBase	23592263	0.5483
RAID02369164	hsa-miR-6715b-3p	miRNA	MIMAT0025843	Homo sapiens	XIST	lncRNA	7503	Homo sapiens	CLIP	NPInter	23846593	0.5483
RAID02369698	hsa-miR-1229-3p	miRNA	MIMAT0005584	Homo sapiens	MALAT1	lncRNA	378938	Homo sapiens	CLIP	NPInter	23846593	0.5483
RAID02369970	hsa-miR-3127-5p	miRNA	MIMAT0014990	Homo sapiens	SNHG3	lncRNA	8420	Homo sapiens	CLIP	NPInter	23846593	0.5483
RAID02371712	hsa-miR-4711-5p	miRNA	MIMAT0019816	Homo sapiens	WT1-AS	lncRNA	51352	Homo sapiens	CLIP	NPInter	23846593	0.5483
RAID02371787	hsa-miR-124-3p	miRNA	MIMAT0000422	Homo sapiens	HOXA11-AS	lncRNA	221883	Homo sapiens	CLIP-seq//Prediction	starBase//miRanda	None	0.6308
RAID02372128	hsa-miR-4749-3p	miRNA	MIMAT0019886	Homo sapiens	WT1-AS	lncRNA	51352	Homo sapiens	CLIP	NPInter	23846593	0.5483
RAID02373298	hsa-miR-92a-3p	miRNA	MIMAT0000092	Homo sapiens	OIP5-AS1	lncRNA	729082	Homo sapiens	CLIP	NPInter	23846593	0.5483
RAID02377143	hsa-miR-496	miRNA	MIMAT0002818	Homo sapiens	DANCR	lncRNA	57291	Homo sapiens	CLIP-seq//Prediction	starBase//miRanda	None	0.6308
RAID02377270	hsa-miR-181c-5p	miRNA	MIMAT0000258	Homo sapiens	CRHR1-IT1	lncRNA	147081	Homo sapiens	CLIP-seq//Prediction	starBase//miRanda	None	0.6308
RAID02379584	hsa-miR-892b	miRNA	MIMAT0004918	Homo sapiens	XIST	lncRNA	7503	Homo sapiens	CLIP	NPInter	23846593	0.5483
RAID02382349	hsa-miR-34a-5p	miRNA	MIMAT0000255	Homo sapiens	LINC01547	lncRNA	84536	Homo sapiens	CLIP-seq//Prediction	starBase//miRanda	None	0.6308
RAID02383877	hsa-miR-629-3p	miRNA	MIMAT0003298	Homo sapiens	LINC00598	lncRNA	646982	Homo sapiens	CLIP-seq	miRTarBase	23824327//19536157	0.5483
RAID02384461	hsa-miR-489-3p	miRNA	MIMAT0002805	Homo sapiens	TP73-AS1	lncRNA	57212	Homo sapiens	CLIP-seq	starBase	None	0.5483
RAID02386977	hsa-miR-1293	miRNA	MIMAT0005883	Homo sapiens	BCYRN1	lncRNA	618	Homo sapiens	CLIP	NPInter	23846593	0.5483
RAID02388381	mmu-miR-144-3p	miRNA	MIMAT0000156	Mus musculus	AI504432	lncRNA	229694	Mus musculus	CLIP-seq//Prediction	starBase//miRanda	None	0.6308
RAID02389486	hsa-miR-15a-5p	miRNA	MIMAT0000068	Homo sapiens	MCM3AP-AS1	lncRNA	114044	Homo sapiens	CLIP-seq//Prediction	miRTarBase//starBase//miRanda	22473208	0.6308
RAID02390320	hsa-miR-32-5p	miRNA	MIMAT0000090	Homo sapiens	DLEU1	lncRNA	10301	Homo sapiens	CLIP-seq	starBase	None	0.5483
RAID02396274	hsa-miR-5196-5p	miRNA	MIMAT0021128	Homo sapiens	LINC00461	lncRNA	645323	Homo sapiens	CLIP	NPInter	23846593	0.5483
RAID02399908	hsa-miR-152-3p	miRNA	MIMAT0000438	Homo sapiens	CRHR1-IT1	lncRNA	147081	Homo sapiens	CLIP-seq//Prediction	starBase//miRanda	None	0.6308
RAID02401081	hsa-miR-548o-5p	miRNA	MIMAT0022738	Homo sapiens	XIST	lncRNA	7503	Homo sapiens	CLIP	NPInter	23846593	0.5483
RAID02401689	hsa-miR-520c-3p	miRNA	MIMAT0002846	Homo sapiens	LINC00598	lncRNA	646982	Homo sapiens	CLIP-seq	miRTarBase	23313552	0.5483
RAID02403100	hsa-miR-181a-5p	miRNA	MIMAT0000256	Homo sapiens	LOC93622	lncRNA	93622	Homo sapiens	CLIP-seq//Prediction	starBase//miRanda	None	0.6308
RAID02403560	hsa-miR-148a-3p	miRNA	MIMAT0000243	Homo sapiens	HOTAIR	lncRNA	100124700	Homo sapiens	Reporter Assay//RT-PCR	RAID	25928008	0.8808
RAID02406639	hsa-miR-340-5p	miRNA	MIMAT0004692	Homo sapiens	LINC00869	lncRNA	57234	Homo sapiens	CLIP-seq//Prediction	starBase//miRanda	None	0.6308
RAID02408704	hsa-let-7c-5p	miRNA	MIMAT0000064	Homo sapiens	KRASP1	lncRNA	3844	Homo sapiens	Reporter Assay//RT-PCR	RAID	20577206	0.8808
RAID02409161	hsa-miR-211-5p	miRNA	MIMAT0000268	Homo sapiens	DGCR5	lncRNA	26220	Homo sapiens	CLIP-seq//Prediction	starBase//miRanda	None	0.6308
RAID02412982	hsa-miR-7160-5p	miRNA	MIMAT0028230	Homo sapiens	LINC00598	lncRNA	646982	Homo sapiens	CLIP-seq	miRTarBase	23824327	0.5483
RAID02413415	hsa-miR-20b-5p	miRNA	MIMAT0001413	Homo sapiens	LINC00472	lncRNA	79940	Homo sapiens	CLIP-seq	starBase	None	0.5483
RAID02414176	hsa-miR-3658	miRNA	MIMAT0018078	Homo sapiens	GAS5	lncRNA	60674	Homo sapiens	CLIP	NPInter	23846593	0.5483
RAID02415308	hsa-miR-93-5p	miRNA	MIMAT0000093	Homo sapiens	THSD1P1	lncRNA	374500	Homo sapiens	CLIP-seq	starBase	None	0.5483
RAID02416592	hsa-miR-185-5p	miRNA	MIMAT0000455	Homo sapiens	SUZ12P1	lncRNA	440423	Homo sapiens	CLIP-seq//Prediction	starBase//miRanda	None	0.6308
RAID02420183	hsa-miR-19a-3p	miRNA	MIMAT0000073	Homo sapiens	SUZ12P1	lncRNA	440423	Homo sapiens	CLIP-seq//Prediction	starBase//miRanda	None	0.6308
RAID02420461	hsa-miR-500b-5p	miRNA	MIMAT0016925	Homo sapiens	BCYRN1	lncRNA	618	Homo sapiens	CLIP	NPInter	23846593	0.5483
RAID02423317	rno-miR-222-3p	miRNA	MIMAT0000891	Rattus norvegicus	Gas5	lncRNA	81714	Rattus norvegicus	Reporter Assay//RT-PCR	RAID	26446789	0.8808
RAID02423708	hsa-miR-4727-5p	miRNA	MIMAT0019847	Homo sapiens	LINC00598	lncRNA	646982	Homo sapiens	CLIP-seq	miRTarBase	23824327	0.5483
RAID02424678	hsa-miR-135a-5p	miRNA	MIMAT0000428	Homo sapiens	LINCMD1	lncRNA	101154644	Homo sapiens	RT-PCR//RNA interference//Reporter Assay	RAID//MNDR//NPInter	22000014//24440503	0.9526
RAID02426754	hsa-miR-30e-3p	miRNA	MIMAT0000693	Homo sapiens	MIR22HG	lncRNA	84981	Homo sapiens	CLIP	NPInter	23846593	0.5483
RAID02427875	hsa-miR-106a-5p	miRNA	MIMAT0000103	Homo sapiens	LINC00116	lncRNA	205251	Homo sapiens	CLIP	NPInter	25531890	0.5483
RAID02427930	hsa-miR-549a	miRNA	MIMAT0003333	Homo sapiens	WT1-AS	lncRNA	51352	Homo sapiens	CLIP	NPInter	23846593	0.5483
RAID02428674	rno-miR-103-3p	miRNA	MIMAT0000824	Rattus norvegicus	H19	lncRNA	309122	Rattus norvegicus	RT-PCR//Pull down Assay	RAID	26038570	0.8808
RAID02429549	hsa-miR-4731-5p	miRNA	MIMAT0019853	Homo sapiens	LINC00598	lncRNA	646982	Homo sapiens	CLIP-seq	miRTarBase	23313552	0.5483
RAID02430393	hsa-miR-548c-3p	miRNA	MIMAT0003285	Homo sapiens	LINC00461	lncRNA	645323	Homo sapiens	CLIP	NPInter	23846593	0.5483
RAID02431928	hsa-miR-125a-3p	miRNA	MIMAT0004602	Homo sapiens	SNHG4	lncRNA	724102	Homo sapiens	CLIP-seq//Prediction	starBase//miRanda	None	0.6308
RAID02432539	hsa-miR-1236-3p	miRNA	MIMAT0005591	Homo sapiens	WT1-AS	lncRNA	51352	Homo sapiens	CLIP	NPInter	23846593	0.5483
RAID02433153	hsa-miR-6876-5p	miRNA	MIMAT0027652	Homo sapiens	LINC00598	lncRNA	646982	Homo sapiens	PAR-CLIP	miRTarBase	23592263	0.5483
RAID02433700	hsa-miR-5001-3p	miRNA	MIMAT0021022	Homo sapiens	BCYRN1	lncRNA	618	Homo sapiens	CLIP	NPInter	23846593	0.5483
RAID02434579	hsa-miR-5000-5p	miRNA	MIMAT0021019	Homo sapiens	HNRNPU	lncRNA	3192	Homo sapiens	CLIP	NPInter	23846593	0.5483
RAID02438132	hsa-miR-4649-3p	miRNA	MIMAT0019712	Homo sapiens	LINC00598	lncRNA	646982	Homo sapiens	CLIP-seq	miRTarBase	23824327	0.5483
RAID02441259	hsa-miR-17-3p	miRNA	MIMAT0000071	Homo sapiens	XIST	lncRNA	7503	Homo sapiens	CLIP	NPInter	23846593	0.5483
RAID02443686	hsa-miR-151a-3p	miRNA	MIMAT0000757	Homo sapiens	WT1-AS	lncRNA	51352	Homo sapiens	CLIP	NPInter	23846593	0.5483
RAID02443705	hsa-miR-3934-5p	miRNA	MIMAT0018349	Homo sapiens	LINC00598	lncRNA	646982	Homo sapiens	CLIP-seq	miRTarBase	23313552	0.5483
RAID02443809	mmu-miR-124-3p	miRNA	MIMAT0000134	Mus musculus	Tmem134	lncRNA	66990	Mus musculus	CLIP-seq	starBase	None	0.5483
RAID02444845	mmu-miR-381-3p	miRNA	MIMAT0000746	Mus musculus	AI504432	lncRNA	229694	Mus musculus	CLIP-seq//Prediction	starBase//miRanda	None	0.6308
RAID02445121	hsa-miR-6508-5p	miRNA	MIMAT0025472	Homo sapiens	XIST	lncRNA	7503	Homo sapiens	CLIP	NPInter	23846593	0.5483
RAID02448899	hsa-miR-577	miRNA	MIMAT0003242	Homo sapiens	BCYRN1	lncRNA	618	Homo sapiens	CLIP	NPInter	23846593	0.5483
RAID02449868	hsa-miR-29b-2-5p	miRNA	MIMAT0004515	Homo sapiens	XIST	lncRNA	7503	Homo sapiens	CLIP	NPInter	23846593	0.5483
RAID02450873	hsa-miR-3173-3p	miRNA	MIMAT0015048	Homo sapiens	MIR22HG	lncRNA	84981	Homo sapiens	CLIP	NPInter	23846593	0.5483
RAID02453920	hsa-miR-3646	miRNA	MIMAT0018065	Homo sapiens	LINC00461	lncRNA	645323	Homo sapiens	CLIP	NPInter	23846593	0.5483
RAID02456542	hsa-miR-4279	miRNA	MIMAT0016909	Homo sapiens	LINC00598	lncRNA	646982	Homo sapiens	CLIP-seq	miRTarBase	23824327//19536157	0.5483
RAID02458225	hsa-miR-5187-3p	miRNA	MIMAT0021118	Homo sapiens	MALAT1	lncRNA	378938	Homo sapiens	CLIP	NPInter	23846593	0.5483
RAID02462599	hsa-miR-33b-5p	miRNA	MIMAT0003301	Homo sapiens	ST7-OT3	lncRNA	93655	Homo sapiens	CLIP-seq//Prediction	starBase//miRanda	None	0.6308
RAID02466366	hsa-miR-335-5p	miRNA	MIMAT0000765	Homo sapiens	SRRM2-AS1	lncRNA	100128788	Homo sapiens	Microarray	miRTarBase	18185580	0.5483
RAID02470860	hsa-miR-302d-3p	miRNA	MIMAT0000718	Homo sapiens	MIR17HG	lncRNA	407975	Homo sapiens	CLIP-seq//Prediction	starBase//miRanda	None	0.6308
RAID02471507	hsa-miR-1178-3p	miRNA	MIMAT0005823	Homo sapiens	LINC00598	lncRNA	646982	Homo sapiens	CLIP-seq	miRTarBase	23824327	0.5483
RAID02475893	hsa-miR-146a-5p	miRNA	MIMAT0000449	Homo sapiens	CCAT2	lncRNA	101805488	Homo sapiens	RT-PCR	NPInter	23796952	0.7311
RAID02476206	hsa-miR-4467	miRNA	MIMAT0018994	Homo sapiens	HOXA10-AS	lncRNA	100874323	Homo sapiens	CLIP	NPInter	23846593	0.5483
RAID02476552	hsa-miR-940	miRNA	MIMAT0004983	Homo sapiens	LINC00598	lncRNA	646982	Homo sapiens	CLIP-seq	miRTarBase	23824327	0.5483
RAID02479739	hsa-miR-124-3p	miRNA	MIMAT0000422	Homo sapiens	MALAT1	lncRNA	378938	Homo sapiens	Reporter Assay//RT-PCR//CLIP	RAID//NPInter	26918449//26242259//23846593	0.9462
RAID02480190	hsa-miR-526a	miRNA	MIMAT0002845	Homo sapiens	TP73-AS1	lncRNA	57212	Homo sapiens	CLIP-seq	starBase	None	0.5483
RAID02482236	hsa-miR-761	miRNA	MIMAT0010364	Homo sapiens	MIR155HG	lncRNA	114614	Homo sapiens	CLIP	NPInter	23846593	0.5483
RAID02482742	hsa-miR-148a-3p	miRNA	MIMAT0000243	Homo sapiens	ZNRD1-AS1	lncRNA	80862	Homo sapiens	CLIP-seq//Prediction	starBase//miRanda	None	0.6308
RAID02483915	hsa-miR-455-5p	miRNA	MIMAT0003150	Homo sapiens	LOC389641	lncRNA	389641	Homo sapiens	CLIP-seq//Prediction	starBase//miRanda	None	0.6308
RAID02485247	hsa-miR-125a-3p	miRNA	MIMAT0004602	Homo sapiens	MIR22HG	lncRNA	84981	Homo sapiens	CLIP	NPInter	23846593	0.5483
RAID02485474	hsa-miR-346	miRNA	MIMAT0000773	Homo sapiens	CROCCP2	lncRNA	84809	Homo sapiens	CLIP-seq	starBase	None	0.5483
RAID02485744	hsa-miR-93-5p	miRNA	MIMAT0000093	Homo sapiens	PTENP1	lncRNA	11191	Homo sapiens	Reporter Assay//RT-PCR//Western Blot	RAID	20577206	0.9526
RAID02488106	hsa-miR-4705	miRNA	MIMAT0019805	Homo sapiens	OIP5-AS1	lncRNA	729082	Homo sapiens	CLIP	NPInter	23846593	0.5483
RAID02488154	hsa-miR-942-5p	miRNA	MIMAT0004985	Homo sapiens	LINC00598	lncRNA	646982	Homo sapiens	CLIP-seq	miRTarBase	23824327	0.5483
RAID02488626	hsa-miR-302a-3p	miRNA	MIMAT0000684	Homo sapiens	LINC00472	lncRNA	79940	Homo sapiens	CLIP-seq	starBase	None	0.5483
RAID02492541	hsa-miR-485-5p	miRNA	MIMAT0002175	Homo sapiens	FTX	lncRNA	100302692	Homo sapiens	CLIP-seq	starBase	None	0.5483
RAID02493403	hsa-miR-520d-3p	miRNA	MIMAT0002856	Homo sapiens	CROCCP2	lncRNA	84809	Homo sapiens	CLIP-seq	starBase	None	0.5483
RAID02493408	hsa-miR-195-5p	miRNA	MIMAT0000461	Homo sapiens	TEX41	lncRNA	401014	Homo sapiens	CLIP-seq//Prediction	starBase//miRanda	None	0.6308
RAID02496194	hsa-miR-6733-5p	miRNA	MIMAT0027367	Homo sapiens	BDNF-AS	lncRNA	497258	Homo sapiens	PAR-CLIP	miRTarBase	23592263	0.5483
RAID02498086	hsa-miR-365a-5p	miRNA	MIMAT0009199	Homo sapiens	XIST	lncRNA	7503	Homo sapiens	CLIP	NPInter	23846593	0.5483
RAID02498553	hsa-miR-194-5p	miRNA	MIMAT0000460	Homo sapiens	ZFAS1	lncRNA	441951	Homo sapiens	CLIP-seq//Prediction	starBase//miRanda	None	0.6308
RAID02499321	hsa-miR-199b-5p	miRNA	MIMAT0000263	Homo sapiens	NUTM2D	lncRNA	728130	Homo sapiens	CLIP-seq	starBase	None	0.5483
RAID02499393	hsa-miR-3122	miRNA	MIMAT0014984	Homo sapiens	BCYRN1	lncRNA	618	Homo sapiens	CLIP	NPInter	23846593	0.5483
RAID02500258	hsa-miR-513a-3p	miRNA	MIMAT0004777	Homo sapiens	BCYRN1	lncRNA	618	Homo sapiens	CLIP	NPInter	23846593	0.5483
RAID02500981	hsa-miR-502-5p	miRNA	MIMAT0002873	Homo sapiens	BCYRN1	lncRNA	618	Homo sapiens	CLIP	NPInter	23846593	0.5483
RAID02501119	ebv-miR-BART14-5p	miRNA	MIMAT0003425	Human herpesvirus 4	PTENP1	lncRNA	11191	Homo sapiens	PAR-CLIP	ViRBase	22100165	0.5483
RAID02501580	hsa-miR-378g	miRNA	MIMAT0018937	Homo sapiens	HOXA10-AS	lncRNA	100874323	Homo sapiens	CLIP	NPInter	23846593	0.5483
RAID02502584	hsa-miR-106a-5p	miRNA	MIMAT0000103	Homo sapiens	DIP2A-IT1	lncRNA	100862692	Homo sapiens	CLIP	NPInter	25531890	0.5483
RAID02503564	hsa-let-7c-5p	miRNA	MIMAT0000064	Homo sapiens	OLMALINC	lncRNA	90271	Homo sapiens	CLIP-seq//Prediction	starBase//miRanda	None	0.6308
RAID02504090	hsa-miR-106b-5p	miRNA	MIMAT0000680	Homo sapiens	MALAT1	lncRNA	378938	Homo sapiens	CLIP	NPInter	23846593	0.5483
RAID02508587	hsa-miR-6781-3p	miRNA	MIMAT0027463	Homo sapiens	LINC00632	lncRNA	286411	Homo sapiens	CLIP-seq	miRTarBase	23824327	0.5483
RAID02512190	hsa-miR-103a-3p	miRNA	MIMAT0000101	Homo sapiens	CTBP1-AS2	lncRNA	92070	Homo sapiens	CLIP-seq//Prediction	starBase//miRanda	None	0.6308
RAID02516255	hsa-miR-150-5p	miRNA	MIMAT0000451	Homo sapiens	H19	lncRNA	283120	Homo sapiens	CLIP-seq//Prediction	starBase//miRanda	None	0.6308
RAID02518255	mmu-miR-411-5p	miRNA	MIMAT0004747	Mus musculus	Rnf149	lncRNA	67702	Mus musculus	CLIP-seq	starBase	None	0.5483
RAID02518915	hsa-miR-153-3p	miRNA	MIMAT0000439	Homo sapiens	ASB16-AS1	lncRNA	339201	Homo sapiens	CLIP-seq//Prediction	starBase//miRanda	None	0.6308
RAID02519566	hsa-miR-181d-5p	miRNA	MIMAT0002821	Homo sapiens	HCP5	lncRNA	10866	Homo sapiens	CLIP-seq//Prediction	starBase//miRanda	None	0.6308
RAID02520081	hsa-miR-3614-3p	miRNA	MIMAT0017993	Homo sapiens	MALAT1	lncRNA	378938	Homo sapiens	CLIP	NPInter	23846593	0.5483
RAID02521756	hsa-miR-26b-5p	miRNA	MIMAT0000083	Homo sapiens	MIR22HG	lncRNA	84981	Homo sapiens	Microarray	miRTarBase	19088304	0.5483
RAID02522224	hsa-miR-206	miRNA	MIMAT0000462	Homo sapiens	LINC00869	lncRNA	57234	Homo sapiens	CLIP-seq//Prediction	starBase//miRanda	None	0.6308
RAID02523676	hsa-miR-4662a-3p	miRNA	MIMAT0019732	Homo sapiens	OIP5-AS1	lncRNA	729082	Homo sapiens	CLIP	NPInter	23846593	0.5483
RAID02524143	hsa-miR-574-5p	miRNA	MIMAT0004795	Homo sapiens	BCYRN1	lncRNA	618	Homo sapiens	CLIP	NPInter	23846593	0.5483
RAID02524377	hsa-miR-548o-3p	miRNA	MIMAT0005919	Homo sapiens	GAS5	lncRNA	60674	Homo sapiens	CLIP	NPInter	23846593	0.5483
RAID02525034	hsa-miR-106a-5p	miRNA	MIMAT0000103	Homo sapiens	HOXA10-AS	lncRNA	100874323	Homo sapiens	CLIP	NPInter	25531890	0.5483
RAID02528468	hsa-miR-566	miRNA	MIMAT0003230	Homo sapiens	BCYRN1	lncRNA	618	Homo sapiens	CLIP	NPInter	23846593	0.5483
RAID02529894	hsa-miR-20b-5p	miRNA	MIMAT0001413	Homo sapiens	OIP5-AS1	lncRNA	729082	Homo sapiens	CLIP//Prediction	NPInter//miRanda	23846593	0.6308
RAID02529906	hsa-mir-135a-1	miRNA	MI0000452	Homo sapiens	LINCMD1	lncRNA	101154644	Homo sapiens	ChIP (chromatin immunoprecipitation assay)	NPInter	22000014	0.5483
RAID02530353	hsa-miR-4797-3p	miRNA	MIMAT0019973	Homo sapiens	LINC00346	lncRNA	283487	Homo sapiens	CLIP-seq	miRTarBase	23824327	0.5483
RAID02532062	hsa-miR-6134	miRNA	MIMAT0024618	Homo sapiens	PAPPA-AS1	lncRNA	493913	Homo sapiens	CLIP-seq	miRTarBase	23824327	0.5483
RAID02533055	hsa-miR-4659b-5p	miRNA	MIMAT0019733	Homo sapiens	OIP5-AS1	lncRNA	729082	Homo sapiens	CLIP	NPInter	23846593	0.5483
RAID02534495	hsa-miR-30a-3p	miRNA	MIMAT0000088	Homo sapiens	TP73-AS1	lncRNA	57212	Homo sapiens	CLIP-seq	starBase	None	0.5483
RAID02535497	hsa-miR-3682-5p	miRNA	MIMAT0019222	Homo sapiens	LINC00461	lncRNA	645323	Homo sapiens	CLIP	NPInter	23846593	0.5483
RAID02535588	hsa-miR-1243	miRNA	MIMAT0005894	Homo sapiens	MALAT1	lncRNA	378938	Homo sapiens	CLIP	NPInter	23846593	0.5483
RAID02535958	hsa-miR-890	miRNA	MIMAT0004912	Homo sapiens	LINC00598	lncRNA	646982	Homo sapiens	CLIP-seq	miRTarBase	23824327	0.5483
RAID02536650	hsa-miR-498	miRNA	MIMAT0002824	Homo sapiens	FAM13A-AS1	lncRNA	285512	Homo sapiens	CLIP-seq	starBase	None	0.5483
RAID02538546	hsa-miR-1229-3p	miRNA	MIMAT0005584	Homo sapiens	SNHG3	lncRNA	8420	Homo sapiens	CLIP	NPInter	23846593	0.5483
RAID02539173	hsa-miR-942-3p	miRNA	MIMAT0026734	Homo sapiens	LINC00598	lncRNA	646982	Homo sapiens	PAR-CLIP	miRTarBase	22012620	0.5483
RAID02539421	hsa-miR-581	miRNA	MIMAT0003246	Homo sapiens	MALAT1	lncRNA	378938	Homo sapiens	CLIP	NPInter	23846593	0.5483
RAID02540594	hsa-miR-1268b	miRNA	MIMAT0018925	Homo sapiens	HNRNPU	lncRNA	3192	Homo sapiens	CLIP	NPInter	23846593	0.5483
RAID02543595	hsa-miR-3065-3p	miRNA	MIMAT0015378	Homo sapiens	OIP5-AS1	lncRNA	729082	Homo sapiens	CLIP	NPInter	23846593	0.5483
RAID02543756	hsa-miR-3126-5p	miRNA	MIMAT0014989	Homo sapiens	BCYRN1	lncRNA	618	Homo sapiens	CLIP	NPInter	23846593	0.5483
RAID02546315	hsa-miR-1267	miRNA	MIMAT0005921	Homo sapiens	XIST	lncRNA	7503	Homo sapiens	CLIP	NPInter	23846593	0.5483
RAID02549508	mmu-miR-135b-5p	miRNA	MIMAT0000612	Mus musculus	AI504432	lncRNA	229694	Mus musculus	CLIP-seq	starBase	None	0.5483
RAID02550437	hsa-miR-526b-5p	miRNA	MIMAT0002835	Homo sapiens	HNRNPU	lncRNA	3192	Homo sapiens	CLIP	NPInter	23846593	0.5483
RAID02550527	mmu-miR-30e-5p	miRNA	MIMAT0000248	Mus musculus	C130071C03Rik	lncRNA	320203	Mus musculus	NGS (Next Generation Sequencing)//Prediction	miRTarBase//miRanda	19536157	0.6308
RAID02551013	hsa-miR-211-5p	miRNA	MIMAT0000268	Homo sapiens	LINC00598	lncRNA	646982	Homo sapiens	CLIP-seq	miRTarBase	23824327	0.5483
RAID02551683	hsa-miR-492	miRNA	MIMAT0002812	Homo sapiens	TP73-AS1	lncRNA	57212	Homo sapiens	CLIP-seq	starBase	None	0.5483
RAID02552267	mmu-miR-18a-5p	miRNA	MIMAT0000528	Mus musculus	BC029722	lncRNA	613262	Mus musculus	CLIP-seq	starBase	None	0.5483
RAID02552361	hsa-miR-106a-5p	miRNA	MIMAT0000103	Homo sapiens	FTO-IT1	lncRNA	100505692	Homo sapiens	CLIP	NPInter	25531890	0.5483
RAID02553392	hsa-miR-106a-5p	miRNA	MIMAT0000103	Homo sapiens	ALG9-IT1	lncRNA	100874303	Homo sapiens	CLIP	NPInter	25531890	0.5483
RAID02554151	hsa-miR-185-3p	miRNA	MIMAT0004611	Homo sapiens	WT1-AS	lncRNA	51352	Homo sapiens	CLIP	NPInter	23846593	0.5483
RAID02554386	hsa-miR-3622a-3p	miRNA	MIMAT0018004	Homo sapiens	BCYRN1	lncRNA	618	Homo sapiens	CLIP	NPInter	23846593	0.5483
RAID02554926	hsa-miR-506-3p	miRNA	MIMAT0002878	Homo sapiens	DLEU1	lncRNA	10301	Homo sapiens	CLIP-seq	miRTarBase	19536157	0.5483
RAID02556540	hsa-miR-187-3p	miRNA	MIMAT0000262	Homo sapiens	HOXA10-AS	lncRNA	100874323	Homo sapiens	CLIP	NPInter	23846593	0.5483
RAID02557711	hsa-miR-337-3p	miRNA	MIMAT0000754	Homo sapiens	TP73-AS1	lncRNA	57212	Homo sapiens	CLIP-seq	starBase	None	0.5483
RAID02562469	hsa-miR-3161	miRNA	MIMAT0015035	Homo sapiens	XIST	lncRNA	7503	Homo sapiens	CLIP	NPInter	23846593	0.5483
RAID02563480	hsa-miR-1913	miRNA	MIMAT0007888	Homo sapiens	MIR137HG	lncRNA	400765	Homo sapiens	CLIP	NPInter	23846593	0.5483
RAID02563849	hsa-miR-190a-5p	miRNA	MIMAT0000458	Homo sapiens	PVT1	lncRNA	5820	Homo sapiens	CLIP-seq//Prediction	starBase//miRanda	None	0.6308
RAID02563935	hsa-miR-193a-3p	miRNA	MIMAT0000459	Homo sapiens	LINC00152	lncRNA	112597	Homo sapiens	CLIP-seq//Prediction	starBase//miRanda	None	0.6308
RAID02564041	hsa-miR-214-3p	miRNA	MIMAT0000271	Homo sapiens	EPB41L4A-AS1	lncRNA	114915	Homo sapiens	CLIP-seq//Prediction	starBase//miRanda	None	0.6308
RAID02564346	hsa-miR-4503	miRNA	MIMAT0019039	Homo sapiens	XIST	lncRNA	7503	Homo sapiens	CLIP	NPInter	23846593	0.5483
RAID02564763	hsa-miR-200c-3p	miRNA	MIMAT0000617	Homo sapiens	H19	lncRNA	283120	Homo sapiens	Western Blot//RT-PCR	LncRNA2Target	23222811	0.8808
RAID02566655	hsa-miR-18b-5p	miRNA	MIMAT0001412	Homo sapiens	HCP5	lncRNA	10866	Homo sapiens	CLIP-seq	starBase	None	0.5483
RAID02571065	hsa-miR-658	miRNA	MIMAT0003336	Homo sapiens	HNRNPU	lncRNA	3192	Homo sapiens	CLIP	NPInter	23846593	0.5483
RAID02572765	hsa-miR-34b-3p	miRNA	MIMAT0004676	Homo sapiens	OIP5-AS1	lncRNA	729082	Homo sapiens	CLIP	NPInter	23846593	0.5483
RAID02573079	hsa-miR-3176	miRNA	MIMAT0015053	Homo sapiens	LINC00598	lncRNA	646982	Homo sapiens	CLIP-seq	miRTarBase	19536157	0.5483
RAID02573535	hsa-miR-583	miRNA	MIMAT0003248	Homo sapiens	LINC00346	lncRNA	283487	Homo sapiens	PAR-CLIP	miRTarBase	20371350	0.5483
RAID02574313	hsa-miR-1305	miRNA	MIMAT0005893	Homo sapiens	OIP5-AS1	lncRNA	729082	Homo sapiens	CLIP	NPInter	23846593	0.5483
RAID02575426	hsa-miR-3652	miRNA	MIMAT0018072	Homo sapiens	MIR22HG	lncRNA	84981	Homo sapiens	CLIP	NPInter	23846593	0.5483
RAID02575923	hsa-miR-4632-3p	miRNA	MIMAT0019688	Homo sapiens	LINC00598	lncRNA	646982	Homo sapiens	CLIP-seq	miRTarBase	23313552	0.5483
RAID02576742	hsa-miR-544a	miRNA	MIMAT0003164	Homo sapiens	DLEU1	lncRNA	10301	Homo sapiens	CLIP-seq//Prediction	starBase//miRanda	None	0.6308
RAID02580376	hsa-miR-7160-5p	miRNA	MIMAT0028230	Homo sapiens	LINC00346	lncRNA	283487	Homo sapiens	CLIP-seq	miRTarBase	23824327	0.5483
RAID02582483	hsa-miR-1237-3p	miRNA	MIMAT0005592	Homo sapiens	LINC00598	lncRNA	646982	Homo sapiens	CLIP-seq	miRTarBase	23824327	0.5483
RAID02583034	hsa-miR-4685-3p	miRNA	MIMAT0019772	Homo sapiens	LINC00598	lncRNA	646982	Homo sapiens	CLIP-seq	miRTarBase	23824327	0.5483
RAID02584141	hsa-miR-1303	miRNA	MIMAT0005891	Homo sapiens	BCYRN1	lncRNA	618	Homo sapiens	CLIP	NPInter	23846593	0.5483
RAID02584594	hsa-miR-4667-3p	miRNA	MIMAT0019744	Homo sapiens	MIR22HG	lncRNA	84981	Homo sapiens	CLIP	NPInter	23846593	0.5483
RAID02588920	hsa-miR-154-5p	miRNA	MIMAT0000452	Homo sapiens	JPX	lncRNA	554203	Homo sapiens	CLIP-seq//Prediction	starBase//miRanda	None	0.6308
RAID02592671	hsa-miR-558	miRNA	MIMAT0003222	Homo sapiens	MALAT1	lncRNA	378938	Homo sapiens	CLIP	NPInter	23846593	0.5483
RAID02592835	hsa-miR-190a-5p	miRNA	MIMAT0000458	Homo sapiens	ZFAS1	lncRNA	441951	Homo sapiens	CLIP-seq//Prediction	starBase//miRanda	None	0.6308
RAID02596127	hsa-miR-497-5p	miRNA	MIMAT0002820	Homo sapiens	MCM3AP-AS1	lncRNA	114044	Homo sapiens	CLIP-seq//Prediction	starBase//miRanda	None	0.6308
RAID02596532	hsa-miR-4735-5p	miRNA	MIMAT0019860	Homo sapiens	LINC00632	lncRNA	286411	Homo sapiens	CLIP-seq	miRTarBase	23313552	0.5483
RAID02597875	hsa-miR-106a-5p	miRNA	MIMAT0000103	Homo sapiens	KIRREL3-AS3	lncRNA	283165	Homo sapiens	CLIP	NPInter	25531890	0.5483
RAID02598994	hsa-miR-1268a	miRNA	MIMAT0005922	Homo sapiens	BCYRN1	lncRNA	618	Homo sapiens	CLIP	NPInter	23846593	0.5483
RAID02602279	hsa-miR-3159	miRNA	MIMAT0015033	Homo sapiens	OIP5-AS1	lncRNA	729082	Homo sapiens	CLIP	NPInter	23846593	0.5483
RAID02602910	hsa-miR-33a-5p	miRNA	MIMAT0000091	Homo sapiens	ST7-OT3	lncRNA	93655	Homo sapiens	CLIP-seq//Prediction	starBase//miRanda	None	0.6308
RAID02605394	hsa-miR-211-5p	miRNA	MIMAT0000268	Homo sapiens	EPB41L4A-AS1	lncRNA	114915	Homo sapiens	CLIP-seq//Prediction	starBase//miRanda	None	0.6308
RAID02605882	hsa-miR-3909	miRNA	MIMAT0018183	Homo sapiens	LINC00598	lncRNA	646982	Homo sapiens	CLIP-seq	miRTarBase	23824327	0.5483
RAID02606361	hsa-miR-675-5p	miRNA	MIMAT0004284	Homo sapiens	H19	lncRNA	283120	Homo sapiens	Western Blot//Reporter Assay//RT-PCR	LncRNA2Target//NPInter//LncRNADisease//RAID	24466011//19239885//26853553	0.9526
RAID02610101	hsa-miR-3689b-3p	miRNA	MIMAT0018181	Homo sapiens	LINC00598	lncRNA	646982	Homo sapiens	CLIP-seq	miRTarBase	23824327	0.5483
RAID02610157	hsa-miR-373-5p	miRNA	MIMAT0000725	Homo sapiens	DLEU1	lncRNA	10301	Homo sapiens	CLIP-seq	miRTarBase	23824327	0.5483
RAID02612175	hsa-miR-376b-3p	miRNA	MIMAT0002172	Homo sapiens	TUG1	lncRNA	55000	Homo sapiens	CLIP-seq//Prediction	starBase//miRanda	None	0.6308
RAID02617399	hsa-miR-193b-3p	miRNA	MIMAT0002819	Homo sapiens	LINC00152	lncRNA	112597	Homo sapiens	CLIP-seq//Prediction	starBase//miRanda	None	0.6308
RAID02617735	hsa-miR-18b-5p	miRNA	MIMAT0001412	Homo sapiens	GAS5	lncRNA	60674	Homo sapiens	CLIP	NPInter	23846593	0.5483
RAID02618285	hsa-miR-576-3p	miRNA	MIMAT0004796	Homo sapiens	XIST	lncRNA	7503	Homo sapiens	CLIP	NPInter	23846593	0.5483
RAID02618351	hsa-miR-383-5p	miRNA	MIMAT0000738	Homo sapiens	ASB16-AS1	lncRNA	339201	Homo sapiens	CLIP-seq//Prediction	starBase//miRanda	None	0.6308
RAID02618565	hsa-miR-148b-3p	miRNA	MIMAT0000759	Homo sapiens	H19	lncRNA	283120	Homo sapiens	CLIP-seq//Prediction	starBase//miRanda	None	0.6308
RAID02619495	hsa-miR-4649-3p	miRNA	MIMAT0019712	Homo sapiens	LINC00346	lncRNA	283487	Homo sapiens	CLIP-seq	miRTarBase	23824327	0.5483
RAID02620093	hsa-miR-6511a-5p	miRNA	MIMAT0025478	Homo sapiens	HNRNPU	lncRNA	3192	Homo sapiens	CLIP	NPInter	23846593	0.5483
RAID02622778	hsa-miR-33a-3p	miRNA	MIMAT0004506	Homo sapiens	LINC00598	lncRNA	646982	Homo sapiens	PAR-CLIP	miRTarBase	22100165	0.5483
RAID02623998	hsa-miR-133a-3p	miRNA	MIMAT0000427	Homo sapiens	LINCMD1	lncRNA	101154644	Homo sapiens	RT-PCR//RNA interference//Reporter Assay	RAID//MNDR//NPInter	24440503//22000014	0.9526
RAID02624470	hsa-miR-1323	miRNA	MIMAT0005795	Homo sapiens	PTENP1	lncRNA	11191	Homo sapiens	RT-PCR	miRTarBase	24367666	0.7311
RAID02625312	hsa-miR-508-3p	miRNA	MIMAT0002880	Homo sapiens	MALAT1	lncRNA	378938	Homo sapiens	CLIP	NPInter	23846593	0.5483
RAID02625854	hsa-miR-4494	miRNA	MIMAT0019029	Homo sapiens	XIST	lncRNA	7503	Homo sapiens	CLIP	NPInter	23846593	0.5483
RAID02627004	hsa-miR-33b-5p	miRNA	MIMAT0003301	Homo sapiens	DLEU1	lncRNA	10301	Homo sapiens	CLIP-seq//Prediction	starBase//miRanda	None	0.6308
RAID02628177	hsa-miR-3127-5p	miRNA	MIMAT0014990	Homo sapiens	XIST	lncRNA	7503	Homo sapiens	CLIP	NPInter	23846593	0.5483
RAID02640410	hsa-miR-512-5p	miRNA	MIMAT0002822	Homo sapiens	XIST	lncRNA	7503	Homo sapiens	CLIP	NPInter	23846593	0.5483
RAID02641852	hsa-let-7b-5p	miRNA	MIMAT0000063	Homo sapiens	LINC00472	lncRNA	79940	Homo sapiens	CLIP-seq	starBase	None	0.5483
RAID02641893	hsa-miR-30a-3p	miRNA	MIMAT0000088	Homo sapiens	MIR22HG	lncRNA	84981	Homo sapiens	CLIP	NPInter	23846593	0.5483
RAID02642331	hsa-miR-378g	miRNA	MIMAT0018937	Homo sapiens	LINC00324	lncRNA	284029	Homo sapiens	CLIP	NPInter	23846593	0.5483
RAID02642361	hsa-let-7i-5p	miRNA	MIMAT0000415	Homo sapiens	HOXA11-AS	lncRNA	221883	Homo sapiens	CLIP-seq//Prediction	starBase//miRanda	None	0.6308
RAID02643764	hsa-miR-378a-3p	miRNA	MIMAT0000732	Homo sapiens	ASB16-AS1	lncRNA	339201	Homo sapiens	CLASH	miRTarBase	23622248	0.5483
RAID02644522	hsa-let-7e-5p	miRNA	MIMAT0000066	Homo sapiens	HOXA11-AS	lncRNA	221883	Homo sapiens	CLIP-seq//Prediction	starBase//miRanda	None	0.6308
RAID02644680	hsa-miR-297	miRNA	MIMAT0004450	Homo sapiens	XIST	lncRNA	7503	Homo sapiens	CLIP	NPInter	23846593	0.5483
RAID02644901	hsa-miR-1913	miRNA	MIMAT0007888	Homo sapiens	MALAT1	lncRNA	378938	Homo sapiens	CLIP	NPInter	23846593	0.5483
RAID02647826	hsa-miR-4745-5p	miRNA	MIMAT0019878	Homo sapiens	XIST	lncRNA	7503	Homo sapiens	CLIP	NPInter	23846593	0.5483
RAID02650276	hsa-miR-148a-3p	miRNA	MIMAT0000243	Homo sapiens	FAM201A	lncRNA	158228	Homo sapiens	CLIP-seq//Prediction	starBase//miRanda	None	0.6308
RAID02651273	hsa-miR-3145-3p	miRNA	MIMAT0015016	Homo sapiens	OIP5-AS1	lncRNA	729082	Homo sapiens	CLIP	NPInter	23846593	0.5483
RAID02651462	hsa-miR-302e	miRNA	MIMAT0005931	Homo sapiens	LINC00598	lncRNA	646982	Homo sapiens	CLIP-seq	miRTarBase	23313552	0.5483
RAID02653220	hsa-miR-106a-5p	miRNA	MIMAT0000103	Homo sapiens	MEG3	lncRNA	55384	Homo sapiens	CLIP	NPInter	25531890	0.5483
RAID02653240	hsa-miR-3927-3p	miRNA	MIMAT0018202	Homo sapiens	WT1-AS	lncRNA	51352	Homo sapiens	CLIP	NPInter	23846593	0.5483
RAID02654610	hsa-miR-17-5p	miRNA	MIMAT0000070	Homo sapiens	SNHG20	lncRNA	654434	Homo sapiens	CLIP-seq//Prediction	starBase//miRanda	None	0.6308
RAID02655727	hsa-miR-1260b	miRNA	MIMAT0015041	Homo sapiens	XIST	lncRNA	7503	Homo sapiens	CLIP	NPInter	23846593	0.5483
RAID02656993	hsa-miR-758-3p	miRNA	MIMAT0003879	Homo sapiens	DANCR	lncRNA	57291	Homo sapiens	CLIP-seq//Prediction	starBase//miRanda	None	0.6308
RAID02657457	hsa-miR-512-5p	miRNA	MIMAT0002822	Homo sapiens	TP73-AS1	lncRNA	57212	Homo sapiens	CLIP-seq	starBase	None	0.5483
RAID02659191	hsa-let-7c-5p	miRNA	MIMAT0000064	Homo sapiens	MGC12916	lncRNA	84815	Homo sapiens	CLIP-seq//Prediction	starBase//miRanda	None	0.6308
RAID02660667	hsa-miR-1273a	miRNA	MIMAT0005926	Homo sapiens	BCYRN1	lncRNA	618	Homo sapiens	CLIP	NPInter	23846593	0.5483
RAID02660973	hsa-miR-20a-5p	miRNA	MIMAT0000075	Homo sapiens	E2F3P1	lncRNA	1872	Homo sapiens	Reporter Assay//RT-PCR	RAID	20577206	0.8808
RAID02661977	hsa-miR-212-3p	miRNA	MIMAT0000269	Homo sapiens	FOXO3B	lncRNA	2310	Homo sapiens	CLIP-seq	starBase	None	0.5483
RAID02662771	hsa-miR-6133	miRNA	MIMAT0024617	Homo sapiens	BCYRN1	lncRNA	618	Homo sapiens	CLIP	NPInter	23846593	0.5483
RAID02662810	hsa-miR-4774-5p	miRNA	MIMAT0019929	Homo sapiens	XIST	lncRNA	7503	Homo sapiens	CLIP	NPInter	23846593	0.5483
RAID02664953	hsa-miR-155-5p	miRNA	MIMAT0000646	Homo sapiens	MIR155HG	lncRNA	114614	Homo sapiens	CLIP-seq//CLIP//Prediction	NPInter//starBase//miRanda	23846593	0.7226
RAID02666008	hsa-miR-139-5p	miRNA	MIMAT0000250	Homo sapiens	HCP5	lncRNA	10866	Homo sapiens	CLIP-seq//Prediction	starBase//miRanda	None	0.6308
RAID02666397	hsa-miR-3135b	miRNA	MIMAT0018985	Homo sapiens	SNHG3	lncRNA	8420	Homo sapiens	CLIP	NPInter	23846593	0.5483
RAID02667217	hsa-miR-539-5p	miRNA	MIMAT0003163	Homo sapiens	PTENP1	lncRNA	11191	Homo sapiens	CLIP-seq//Prediction	starBase//miRanda	None	0.6308
RAID02670597	hsa-miR-520c-5p	miRNA	MIMAT0005455	Homo sapiens	XIST	lncRNA	7503	Homo sapiens	CLIP	NPInter	23846593	0.5483
RAID02671200	hsa-miR-106a-5p	miRNA	MIMAT0000103	Homo sapiens	KCNQ1OT1	lncRNA	10984	Homo sapiens	CLIP	NPInter	25531890	0.5483
RAID02675420	hsa-miR-15a-5p	miRNA	MIMAT0000068	Homo sapiens	LINC00339	lncRNA	29092	Homo sapiens	CLIP-seq//Prediction	starBase//miRanda	None	0.6308
RAID02677559	hsa-miR-106a-5p	miRNA	MIMAT0000103	Homo sapiens	FER1L4	lncRNA	80307	Homo sapiens	RT-PCR	RAID	26224446	0.7311
RAID02680418	hsa-miR-5001-5p	miRNA	MIMAT0021021	Homo sapiens	BCYRN1	lncRNA	618	Homo sapiens	CLIP	NPInter	23846593	0.5483
RAID02681521	hsa-miR-590-3p	miRNA	MIMAT0004801	Homo sapiens	SNHG1	lncRNA	23642	Homo sapiens	CLIP	NPInter	23846593	0.5483
RAID02683937	hsa-miR-190b	miRNA	MIMAT0004929	Homo sapiens	MIR155HG	lncRNA	114614	Homo sapiens	CLIP-seq//Prediction	starBase//miRanda	None	0.6308
RAID02684895	hsa-miR-6884-5p	miRNA	MIMAT0027668	Homo sapiens	LINC00598	lncRNA	646982	Homo sapiens	CLIP-seq	miRTarBase	23824327	0.5483
RAID02685759	hsa-miR-15a-3p	miRNA	MIMAT0004488	Homo sapiens	XIST	lncRNA	7503	Homo sapiens	CLIP	NPInter	23846593	0.5483
RAID02686575	hsa-miR-551b-5p	miRNA	MIMAT0004794	Homo sapiens	XIST	lncRNA	7503	Homo sapiens	CLIP	NPInter	23846593	0.5483
RAID02687257	hsa-miR-548a-3p	miRNA	MIMAT0003251	Homo sapiens	GAS5	lncRNA	60674	Homo sapiens	CLIP	NPInter	23846593	0.5483
RAID02688531	hsa-miR-539-5p	miRNA	MIMAT0003163	Homo sapiens	TP73-AS1	lncRNA	57212	Homo sapiens	CLIP-seq//Prediction	starBase//miRanda	None	0.6308
RAID02688773	hsa-miR-4653-3p	miRNA	MIMAT0019719	Homo sapiens	OIP5-AS1	lncRNA	729082	Homo sapiens	CLIP	NPInter	23846593	0.5483
RAID02689615	hsa-miR-337-3p	miRNA	MIMAT0000754	Homo sapiens	XIST	lncRNA	7503	Homo sapiens	CLIP	NPInter	23846593	0.5483
RAID02691069	hsa-miR-3152-5p	miRNA	MIMAT0019207	Homo sapiens	BCYRN1	lncRNA	618	Homo sapiens	CLIP	NPInter	23846593	0.5483
RAID02692393	hsa-miR-98-5p	miRNA	MIMAT0000096	Homo sapiens	HOXA11-AS	lncRNA	221883	Homo sapiens	CLIP-seq//Prediction	starBase//miRanda	None	0.6308
RAID02693271	hsa-miR-34c-5p	miRNA	MIMAT0000686	Homo sapiens	TUG1	lncRNA	55000	Homo sapiens	CLIP-seq	starBase	None	0.5483
RAID02693979	hsa-miR-300	miRNA	MIMAT0004903	Homo sapiens	TUG1	lncRNA	55000	Homo sapiens	CLIP-seq//Prediction	starBase//miRanda	None	0.6308
RAID02695046	hsa-miR-548ar-3p	miRNA	MIMAT0022266	Homo sapiens	MALAT1	lncRNA	378938	Homo sapiens	CLIP	NPInter	23846593	0.5483
RAID02695881	hsa-miR-4666b	miRNA	MIMAT0022485	Homo sapiens	OIP5-AS1	lncRNA	729082	Homo sapiens	CLIP	NPInter	23846593	0.5483
RAID02697039	hsa-miR-429	miRNA	MIMAT0001536	Homo sapiens	MCM3AP-AS1	lncRNA	114044	Homo sapiens	CLIP-seq//Prediction	starBase//miRanda	None	0.6308
RAID02697835	mmu-miR-223-3p	miRNA	MIMAT0000665	Mus musculus	Pvt1	lncRNA	19296	Mus musculus	NGS (Next Generation Sequencing)	miRTarBase	19536157	0.5483
RAID02698940	hsa-miR-4498	miRNA	MIMAT0019033	Homo sapiens	BCYRN1	lncRNA	618	Homo sapiens	CLIP	NPInter	23846593	0.5483
RAID02701255	hsa-miR-106a-5p	miRNA	MIMAT0000103	Homo sapiens	OLMALINC	lncRNA	90271	Homo sapiens	CLIP	NPInter	25531890	0.5483
RAID02701261	hsa-miR-26a-5p	miRNA	MIMAT0000082	Homo sapiens	PTENP1	lncRNA	11191	Homo sapiens	Reporter Assay//RT-PCR//Western Blot	RAID	20577206	0.9526
RAID02702940	hsa-miR-664a-3p	miRNA	MIMAT0005949	Homo sapiens	XIST	lncRNA	7503	Homo sapiens	CLIP	NPInter	23846593	0.5483
RAID02705501	hsa-miR-564	miRNA	MIMAT0003228	Homo sapiens	LINC00346	lncRNA	283487	Homo sapiens	CLIP-seq	miRTarBase	23824327	0.5483
RAID02706018	hsa-miR-1273c	miRNA	MIMAT0015017	Homo sapiens	BCYRN1	lncRNA	618	Homo sapiens	CLIP	NPInter	23846593	0.5483
RAID02706121	hsa-miR-200b-3p	miRNA	MIMAT0000318	Homo sapiens	DLEU1	lncRNA	10301	Homo sapiens	CLIP-seq//Prediction	starBase//miRanda	None	0.6308
RAID02706474	kshv-miR-K12-4-5p	miRNA	MIMAT0002191	Human herpesvirus 8	PTENP1	lncRNA	11191	Homo sapiens	PAR-CLIP	ViRBase	22100165	0.5483
RAID02706934	hsa-miR-625-5p	miRNA	MIMAT0003294	Homo sapiens	MIR155HG	lncRNA	114614	Homo sapiens	CLIP	NPInter	23846593	0.5483
RAID02706993	hsa-miR-4647	miRNA	MIMAT0019709	Homo sapiens	MALAT1	lncRNA	378938	Homo sapiens	CLIP	NPInter	23846593	0.5483
RAID02708653	hsa-miR-4729	miRNA	MIMAT0019851	Homo sapiens	XIST	lncRNA	7503	Homo sapiens	CLIP	NPInter	23846593	0.5483
RAID02710470	hsa-miR-155-5p	miRNA	MIMAT0000646	Homo sapiens	URB1-AS1	lncRNA	84996	Homo sapiens	CLIP-seq//Prediction	starBase//miRanda	None	0.6308
RAID02711940	hsa-miR-301a-3p	miRNA	MIMAT0000688	Homo sapiens	MIR17HG	lncRNA	407975	Homo sapiens	CLIP-seq//Prediction	starBase//miRanda	None	0.6308
RAID02714178	kshv-miR-K12-4-5p	miRNA	MIMAT0002191	Human herpesvirus 8	LRRC75A-AS1	lncRNA	125144	Homo sapiens	PAR-CLIP	ViRBase	22100165	0.5483
RAID02717327	hsa-miR-548am-3p	miRNA	MIMAT0019076	Homo sapiens	OIP5-AS1	lncRNA	729082	Homo sapiens	CLIP	NPInter	23846593	0.5483
RAID02719400	hsa-miR-1260a	miRNA	MIMAT0005911	Homo sapiens	BCYRN1	lncRNA	618	Homo sapiens	CLIP	NPInter	23846593	0.5483
RAID02720117	hsa-miR-488-3p	miRNA	MIMAT0004763	Homo sapiens	LINC00339	lncRNA	29092	Homo sapiens	CLIP-seq//Prediction	starBase//miRanda	None	0.6308
RAID02721607	hsa-miR-335-5p	miRNA	MIMAT0000765	Homo sapiens	NUTM2D	lncRNA	728130	Homo sapiens	Microarray	miRTarBase	18185580	0.5483
RAID02724438	hsa-miR-196a-5p	miRNA	MIMAT0000226	Homo sapiens	HOXA10-AS	lncRNA	100874323	Homo sapiens	CLIP	NPInter	23846593	0.5483
RAID02724921	hsa-miR-4778-3p	miRNA	MIMAT0019937	Homo sapiens	SNHG3	lncRNA	8420	Homo sapiens	CLIP	NPInter	23846593	0.5483
RAID02724957	hsa-miR-370-3p	miRNA	MIMAT0000722	Homo sapiens	TUG1	lncRNA	55000	Homo sapiens	CLIP-seq//Prediction	starBase//miRanda	None	0.6308
RAID02727051	hsa-miR-155-5p	miRNA	MIMAT0000646	Homo sapiens	LOC152225	lncRNA	152225	Homo sapiens	CLIP-seq//Prediction	starBase//miRanda	None	0.6308
RAID02728975	hsa-miR-22-3p	miRNA	MIMAT0000077	Homo sapiens	HCP5	lncRNA	10866	Homo sapiens	CLIP-seq//Prediction	starBase//miRanda	None	0.6308
RAID02732391	mmu-miR-206-3p	miRNA	MIMAT0000239	Mus musculus	Rnf149	lncRNA	67702	Mus musculus	CLIP-seq	starBase	None	0.5483
RAID02733386	hsa-miR-212-3p	miRNA	MIMAT0000269	Homo sapiens	LINC00869	lncRNA	57234	Homo sapiens	CLIP-seq//Prediction	starBase//miRanda	None	0.6308
RAID02735136	hsa-miR-320b	miRNA	MIMAT0005792	Homo sapiens	XIST	lncRNA	7503	Homo sapiens	CLIP	NPInter	23846593	0.5483
RAID02737161	hsa-miR-374a-3p	miRNA	MIMAT0004688	Homo sapiens	LRRC75A-AS1	lncRNA	125144	Homo sapiens	CLIP	NPInter	23846593	0.5483
RAID02737953	hsa-miR-4786-5p	miRNA	MIMAT0019954	Homo sapiens	GAS5	lncRNA	60674	Homo sapiens	CLIP	NPInter	23846593	0.5483
RAID02739357	hsa-miR-520c-3p	miRNA	MIMAT0002846	Homo sapiens	XIST	lncRNA	7503	Homo sapiens	CLIP	NPInter	23846593	0.5483
RAID02740868	hsa-miR-4646-5p	miRNA	MIMAT0019707	Homo sapiens	OIP5-AS1	lncRNA	729082	Homo sapiens	CLIP	NPInter	23846593	0.5483
RAID02745474	hsa-miR-2054	miRNA	MIMAT0009979	Homo sapiens	OIP5-AS1	lncRNA	729082	Homo sapiens	CLIP	NPInter	23846593	0.5483
RAID02746129	hsa-miR-1273g-3p	miRNA	MIMAT0022742	Homo sapiens	GAS5	lncRNA	60674	Homo sapiens	CLIP	NPInter	23846593	0.5483
RAID02747736	hsa-miR-3200-5p	miRNA	MIMAT0017392	Homo sapiens	BCYRN1	lncRNA	618	Homo sapiens	CLIP	NPInter	23846593	0.5483
RAID02748252	hsa-miR-96-5p	miRNA	MIMAT0000095	Homo sapiens	MALAT1	lncRNA	378938	Homo sapiens	CLIP	NPInter	23846593	0.5483
RAID02749540	hsa-miR-6785-5p	miRNA	MIMAT0027470	Homo sapiens	LINC00598	lncRNA	646982	Homo sapiens	CLIP-seq	miRTarBase	23824327	0.5483
RAID02749987	hsa-miR-9-5p	miRNA	MIMAT0000441	Homo sapiens	LINC00324	lncRNA	284029	Homo sapiens	CLIP	NPInter	23846593	0.5483
RAID02751553	hsa-let-7c-5p	miRNA	MIMAT0000064	Homo sapiens	CTBP1-AS2	lncRNA	92070	Homo sapiens	CLIP-seq	starBase	None	0.5483
RAID02754359	hsa-miR-144-3p	miRNA	MIMAT0000436	Homo sapiens	FAM201A	lncRNA	158228	Homo sapiens	CLIP-seq//Prediction	starBase//miRanda	None	0.6308
RAID02754444	hsa-miR-98-5p	miRNA	MIMAT0000096	Homo sapiens	MGC12916	lncRNA	84815	Homo sapiens	CLIP-seq//Prediction	starBase//miRanda	None	0.6308
RAID02756063	hsa-miR-421	miRNA	MIMAT0003339	Homo sapiens	XIST	lncRNA	7503	Homo sapiens	CLIP	NPInter	23846593	0.5483
RAID02759190	hsa-miR-4707-3p	miRNA	MIMAT0019808	Homo sapiens	LINC00598	lncRNA	646982	Homo sapiens	CLIP-seq	miRTarBase	23313552	0.5483
RAID02759408	hsa-miR-488-3p	miRNA	MIMAT0004763	Homo sapiens	PVT1	lncRNA	5820	Homo sapiens	CLIP-seq//Prediction	starBase//miRanda	None	0.6308
RAID02763798	hsa-miR-548ak	miRNA	MIMAT0019013	Homo sapiens	MALAT1	lncRNA	378938	Homo sapiens	CLIP	NPInter	23846593	0.5483
RAID02766273	mmu-miR-92b-3p	miRNA	MIMAT0004899	Mus musculus	6330403K07Rik	lncRNA	103712	Mus musculus	CLIP-seq	starBase	None	0.5483
RAID02766592	hsa-miR-5586-3p	miRNA	MIMAT0022288	Homo sapiens	XIST	lncRNA	7503	Homo sapiens	CLIP	NPInter	23846593	0.5483
RAID02767088	hsa-miR-145-5p	miRNA	MIMAT0000437	Homo sapiens	JPX	lncRNA	554203	Homo sapiens	CLIP-seq//Prediction	starBase//miRanda	None	0.6308
RAID02768860	hsa-miR-450a-1-3p	miRNA	MIMAT0022700	Homo sapiens	LINC00598	lncRNA	646982	Homo sapiens	CLIP-seq	miRTarBase	23824327	0.5483
RAID02769172	hsa-miR-106a-5p	miRNA	MIMAT0000103	Homo sapiens	LRRC75A-AS1	lncRNA	125144	Homo sapiens	CLIP	NPInter	25531890	0.5483
RAID02770707	hsa-miR-106a-5p	miRNA	MIMAT0000103	Homo sapiens	SNHG9	lncRNA	735301	Homo sapiens	CLIP	NPInter	25531890	0.5483
RAID02771133	hsa-miR-6744-3p	miRNA	MIMAT0027390	Homo sapiens	LINC00598	lncRNA	646982	Homo sapiens	CLIP-seq	miRTarBase	23313552	0.5483
RAID02771671	hsa-miR-670-5p	miRNA	MIMAT0010357	Homo sapiens	MALAT1	lncRNA	378938	Homo sapiens	CLIP	NPInter	23846593	0.5483
RAID02771917	hsa-miR-520e	miRNA	MIMAT0002825	Homo sapiens	TP73-AS1	lncRNA	57212	Homo sapiens	CLIP-seq	starBase	None	0.5483
RAID02775081	hsa-miR-145-5p	miRNA	MIMAT0000437	Homo sapiens	FAM201A	lncRNA	158228	Homo sapiens	CLIP-seq//Prediction	starBase//miRanda	None	0.6308
RAID02775086	hsa-miR-515-3p	miRNA	MIMAT0002827	Homo sapiens	WT1-AS	lncRNA	51352	Homo sapiens	CLIP	NPInter	23846593	0.5483
RAID02776230	hsa-miR-181c-5p	miRNA	MIMAT0000258	Homo sapiens	IPW	lncRNA	3653	Homo sapiens	CLIP-seq//Prediction	starBase//miRanda	None	0.6308
RAID02781072	hsa-miR-30d-5p	miRNA	MIMAT0000245	Homo sapiens	CTBP1-AS2	lncRNA	92070	Homo sapiens	CLIP-seq//Prediction	starBase//miRanda	None	0.6308
RAID02785280	hsa-miR-494-3p	miRNA	MIMAT0002816	Homo sapiens	TP73-AS1	lncRNA	57212	Homo sapiens	CLIP-seq//Prediction	starBase//miRanda	None	0.6308
RAID02788678	hsa-miR-1972	miRNA	MIMAT0009447	Homo sapiens	XIST	lncRNA	7503	Homo sapiens	CLIP	NPInter	23846593	0.5483
RAID02789358	hsa-miR-142-5p	miRNA	MIMAT0000433	Homo sapiens	OIP5-AS1	lncRNA	729082	Homo sapiens	CLIP	NPInter	23846593	0.5483
RAID02790469	hsa-miR-876-5p	miRNA	MIMAT0004924	Homo sapiens	MCM3AP-AS1	lncRNA	114044	Homo sapiens	CLIP-seq//Prediction	starBase//miRanda	None	0.6308
RAID02790705	hsa-miR-4717-5p	miRNA	MIMAT0019829	Homo sapiens	MALAT1	lncRNA	378938	Homo sapiens	CLIP	NPInter	23846593	0.5483
RAID02791327	hsa-miR-939-5p	miRNA	MIMAT0004982	Homo sapiens	LINC00346	lncRNA	283487	Homo sapiens	CLIP-seq	miRTarBase	23824327	0.5483
RAID02792133	hsa-miR-4509	miRNA	MIMAT0019046	Homo sapiens	WT1-AS	lncRNA	51352	Homo sapiens	CLIP	NPInter	23846593	0.5483
RAID02793848	mmu-let-7c-5p	miRNA	MIMAT0000523	Mus musculus	Rab10os	lncRNA	74173	Mus musculus	CLIP-seq	starBase	None	0.5483
RAID02797898	hsa-miR-4756-3p	miRNA	MIMAT0019900	Homo sapiens	BCYRN1	lncRNA	618	Homo sapiens	CLIP	NPInter	23846593	0.5483
RAID02798089	hsa-miR-4649-5p	miRNA	MIMAT0019711	Homo sapiens	BCYRN1	lncRNA	618	Homo sapiens	CLIP	NPInter	23846593	0.5483
RAID02798770	hsa-miR-146b-5p	miRNA	MIMAT0002809	Homo sapiens	ZNF37BP	lncRNA	100129482	Homo sapiens	CLIP-seq	starBase	None	0.5483
RAID02799395	hsa-miR-149-5p	miRNA	MIMAT0000450	Homo sapiens	HNRNPU	lncRNA	3192	Homo sapiens	CLIP	NPInter	23846593	0.5483
RAID02802065	hsa-miR-4649-5p	miRNA	MIMAT0019711	Homo sapiens	WT1-AS	lncRNA	51352	Homo sapiens	CLIP	NPInter	23846593	0.5483
RAID02809000	hsa-miR-106a-5p	miRNA	MIMAT0000103	Homo sapiens	RASA2-IT1	lncRNA	100874298	Homo sapiens	CLIP	NPInter	25531890	0.5483
RAID02809255	hsa-miR-4690-5p	miRNA	MIMAT0019779	Homo sapiens	OIP5-AS1	lncRNA	729082	Homo sapiens	CLIP	NPInter	23846593	0.5483
RAID02809938	hsa-miR-340-5p	miRNA	MIMAT0004692	Homo sapiens	IPW	lncRNA	3653	Homo sapiens	CLIP-seq//Prediction	starBase//miRanda	None	0.6308
RAID02811451	hsa-miR-4779	miRNA	MIMAT0019938	Homo sapiens	XIST	lncRNA	7503	Homo sapiens	CLIP	NPInter	23846593	0.5483
RAID02813899	hsa-miR-377-3p	miRNA	MIMAT0000730	Homo sapiens	SNHG4	lncRNA	724102	Homo sapiens	CLIP-seq//Prediction	starBase//miRanda	None	0.6308
RAID02816771	hsa-miR-4736	miRNA	MIMAT0019862	Homo sapiens	LINC00598	lncRNA	646982	Homo sapiens	CLIP-seq	miRTarBase	23824327	0.5483
RAID02819048	hsa-miR-449b-3p	miRNA	MIMAT0009203	Homo sapiens	GAS5	lncRNA	60674	Homo sapiens	CLIP	NPInter	23846593	0.5483
RAID02819420	hsa-miR-376b-3p	miRNA	MIMAT0002172	Homo sapiens	OIP5-AS1	lncRNA	729082	Homo sapiens	CLIP	NPInter	23846593	0.5483
RAID02819424	hsa-miR-4688	miRNA	MIMAT0019777	Homo sapiens	XIST	lncRNA	7503	Homo sapiens	CLIP	NPInter	23846593	0.5483
RAID02819468	hsa-miR-3153	miRNA	MIMAT0015026	Homo sapiens	BDNF-AS	lncRNA	497258	Homo sapiens	PAR-CLIP	miRTarBase	23592263	0.5483
RAID02819624	hsa-miR-4714-3p	miRNA	MIMAT0019823	Homo sapiens	LRRC75A-AS1	lncRNA	125144	Homo sapiens	CLIP	NPInter	23846593	0.5483
RAID02820834	hsa-miR-181b-5p	miRNA	MIMAT0000257	Homo sapiens	CRHR1-IT1	lncRNA	147081	Homo sapiens	CLIP-seq//Prediction	starBase//miRanda	None	0.6308
RAID02820959	hsa-miR-30e-5p	miRNA	MIMAT0000692	Homo sapiens	MALAT1	lncRNA	378938	Homo sapiens	CLIP	NPInter	23846593	0.5483
RAID02821717	hsa-miR-520b	miRNA	MIMAT0002843	Homo sapiens	LINC00598	lncRNA	646982	Homo sapiens	CLIP-seq	miRTarBase	23313552	0.5483
RAID02822348	hsa-miR-106a-5p	miRNA	MIMAT0000103	Homo sapiens	COX10-AS1	lncRNA	100874058	Homo sapiens	CLIP	NPInter	25531890	0.5483
RAID02823404	hsa-miR-764	miRNA	MIMAT0010367	Homo sapiens	DLEU1	lncRNA	10301	Homo sapiens	CLIP-seq	miRTarBase	23824327	0.5483
RAID02826293	hsa-let-7e-5p	miRNA	MIMAT0000066	Homo sapiens	LRRC75A-AS1	lncRNA	125144	Homo sapiens	CLIP-seq	starBase	None	0.5483
RAID02828631	hsa-miR-1-3p	miRNA	MIMAT0000416	Homo sapiens	GJA1	lncRNA	2697	Homo sapiens	Reporter Assay//RT-PCR	RAID	20577206	0.8808
RAID02829670	hsa-miR-2276-5p	miRNA	MIMAT0026921	Homo sapiens	LINC00598	lncRNA	646982	Homo sapiens	CLIP-seq	miRTarBase	23824327	0.5483
RAID02830069	hsa-miR-6715b-3p	miRNA	MIMAT0025843	Homo sapiens	SNHG3	lncRNA	8420	Homo sapiens	CLIP	NPInter	23846593	0.5483
RAID02831137	hsa-miR-374b-5p	miRNA	MIMAT0004955	Homo sapiens	MCM3AP-AS1	lncRNA	114044	Homo sapiens	CLIP-seq//Prediction	starBase//miRanda	None	0.6308
RAID02832121	hsa-miR-335-3p	miRNA	MIMAT0004703	Homo sapiens	BCYRN1	lncRNA	618	Homo sapiens	CLIP	NPInter	23846593	0.5483
RAID02832189	hsa-let-7i-5p	miRNA	MIMAT0000415	Homo sapiens	KRASP1	lncRNA	3844	Homo sapiens	Reporter Assay//RT-PCR	RAID	20577206	0.8808
RAID02835159	hsa-miR-1268a	miRNA	MIMAT0005922	Homo sapiens	HNRNPU	lncRNA	3192	Homo sapiens	CLIP	NPInter	23846593	0.5483
RAID02835257	hsa-miR-218-5p	miRNA	MIMAT0000275	Homo sapiens	LRRC75A-AS1	lncRNA	125144	Homo sapiens	CLIP-seq//Prediction	starBase//miRanda	None	0.6308
RAID02838725	hsa-miR-3689a-3p	miRNA	MIMAT0018118	Homo sapiens	LINC00598	lncRNA	646982	Homo sapiens	CLIP-seq	miRTarBase	23824327	0.5483
RAID02841312	hsa-miR-106a-5p	miRNA	MIMAT0000103	Homo sapiens	TUG1	lncRNA	55000	Homo sapiens	CLIP	NPInter	25531890	0.5483
RAID02841317	hsa-miR-497-5p	miRNA	MIMAT0002820	Homo sapiens	PVT1	lncRNA	5820	Homo sapiens	CLIP-seq//Prediction	starBase//miRanda	None	0.6308
RAID02842459	hsa-let-7g-5p	miRNA	MIMAT0000414	Homo sapiens	MCM3AP-AS1	lncRNA	114044	Homo sapiens	CLIP-seq	starBase	None	0.5483
RAID02843681	hsa-miR-3689b-3p	miRNA	MIMAT0018181	Homo sapiens	LINC00346	lncRNA	283487	Homo sapiens	CLIP-seq	miRTarBase	23824327	0.5483
RAID02844502	hsa-miR-675-3p	miRNA	MIMAT0006790	Homo sapiens	LINC00955	lncRNA	285492	Homo sapiens	PAR-CLIP	miRTarBase	21572407	0.5483
RAID02845425	hsa-miR-639	miRNA	MIMAT0003309	Homo sapiens	MALAT1	lncRNA	378938	Homo sapiens	CLIP	NPInter	23846593	0.5483
RAID02848484	hsa-miR-106a-5p	miRNA	MIMAT0000103	Homo sapiens	DANCR	lncRNA	57291	Homo sapiens	CLIP	NPInter	25531890	0.5483
RAID02848600	hsa-miR-106a-5p	miRNA	MIMAT0000103	Homo sapiens	KCNH1-IT1	lncRNA	100874296	Homo sapiens	CLIP	NPInter	25531890	0.5483
RAID02850272	hsa-miR-505-3p	miRNA	MIMAT0002876	Homo sapiens	RPL23AP82	lncRNA	284942	Homo sapiens	CLIP-seq//Prediction	starBase//miRanda	None	0.6308
RAID02854789	hsa-miR-340-3p	miRNA	MIMAT0000750	Homo sapiens	TP73-AS1	lncRNA	57212	Homo sapiens	CLIP-seq	starBase	None	0.5483
RAID02858233	mmu-miR-340-5p	miRNA	MIMAT0004651	Mus musculus	AI504432	lncRNA	229694	Mus musculus	CLIP-seq	starBase	None	0.5483
RAID02859953	hsa-miR-5590-3p	miRNA	MIMAT0022300	Homo sapiens	LINC00346	lncRNA	283487	Homo sapiens	PAR-CLIP	miRTarBase	20371350	0.5483
RAID02860411	hsa-miR-148b-3p	miRNA	MIMAT0000759	Homo sapiens	ZNRD1-AS1	lncRNA	80862	Homo sapiens	CLIP-seq//Prediction	starBase//miRanda	None	0.6308
RAID02865920	hsa-miR-324-3p	miRNA	MIMAT0000762	Homo sapiens	MIR17HG	lncRNA	407975	Homo sapiens	CLIP-seq	starBase	None	0.5483
RAID02866385	hsa-miR-301a-3p	miRNA	MIMAT0000688	Homo sapiens	LINC00339	lncRNA	29092	Homo sapiens	CLIP-seq//Prediction	starBase//miRanda	None	0.6308
RAID02866639	hsa-miR-190b	miRNA	MIMAT0004929	Homo sapiens	ZFAS1	lncRNA	441951	Homo sapiens	CLIP-seq//Prediction	starBase//miRanda	None	0.6308
RAID02868922	hsa-miR-513b-5p	miRNA	MIMAT0005788	Homo sapiens	OIP5-AS1	lncRNA	729082	Homo sapiens	CLIP	NPInter	23846593	0.5483
[truncated: 863 more rows]
