# Supplementary material for: Predicting lncRNA–Protein Interactions With miRNAs as Mediators in a Heterogeneous Network Model
Source: Front Genet. 2020 Jan 22;10:1341. doi: 10.3389/fgene.2019.01341 (PMC6988623; doi:10.3389/fgene.2019.01341)
Supplement: Table S2 — 2521 experimentally verified protein-miRNA interactions. [file Table_2.xlsx]

## Sheet: TableS2_MPI_TrainingSet
RAID_id	Interactor1	Category1	Id1	Species1	Interactor2	Category2	Id2	Species2	Methods	Databases_source	References	Score
RAID00003358	hsa-miR-96-5p	miRNA	MIMAT0000095	Homo sapiens	LIN28B	protein	389421	Homo sapiens	CLIP-seq	starBase	None	0.5483
RAID00011142	hsa-miR-27a-3p	miRNA	MIMAT0000084	Homo sapiens	FMR1	protein	2332	Homo sapiens	CLIP-seq	starBase	None	0.5483
RAID00012801	hsa-mir-125b-2	miRNA	MI0000470	Homo sapiens	DGCR8	protein	54487	Homo sapiens	CLIP-seq	starBase	None	0.5483
RAID00018496	mmu-miR-1983	miRNA	MIMAT0009455	Mus musculus	Ptbp2	protein	56195	Mus musculus	CLIP-seq	starBase	None	0.5483
RAID00021014	hsa-mir-3607	miRNA	MI0015997	Homo sapiens	TNRC6A	protein	27327	Homo sapiens	CLIP-seq	starBase	None	0.5483
RAID00022238	hsa-miR-449b-5p	miRNA	MIMAT0003327	Homo sapiens	DGCR8	protein	54487	Homo sapiens	CLIP-seq	starBase	None	0.5483
RAID00022838	hsa-miR-148a-3p	miRNA	MIMAT0000243	Homo sapiens	TGIF2	protein	60436	Homo sapiens	Western Blot//Reporter Assay	RAID	18768788	0.8808
RAID00023290	hsa-mir-3613	miRNA	MI0016003	Homo sapiens	QKI	protein	9444	Homo sapiens	CLIP-seq	starBase	None	0.5483
RAID00023503	hsa-miR-3691-5p	miRNA	MIMAT0018120	Homo sapiens	DGCR8	protein	54487	Homo sapiens	CLIP-seq	starBase	None	0.5483
RAID00026105	mmu-mir-19b-2	miRNA	MI0000546	Mus musculus	Fus	protein	233908	Mus musculus	CLIP-seq	starBase	None	0.5483
RAID00026340	hsa-miR-3122	miRNA	MIMAT0014984	Homo sapiens	EIF4A3	protein	9775	Homo sapiens	CLIP-seq	starBase	None	0.5483
RAID00028403	hsa-miR-1301-3p	miRNA	MIMAT0005797	Homo sapiens	FMR1	protein	2332	Homo sapiens	CLIP-seq	starBase	None	0.5483
RAID00028624	hsa-mir-3648-1	miRNA	MI0016048	Homo sapiens	EWSR1	protein	2130	Homo sapiens	CLIP-seq	starBase	None	0.5483
RAID00028890	hsa-mir-340	miRNA	MI0000802	Homo sapiens	DGCR8	protein	54487	Homo sapiens	CLIP-seq	starBase	None	0.5483
RAID00030721	hsa-mir-129-2	miRNA	MI0000473	Homo sapiens	FUS	protein	2521	Homo sapiens	CLIP-seq	starBase	None	0.5483
RAID00030993	hsa-miR-3655	miRNA	MIMAT0018075	Homo sapiens	ELAVL1	protein	1994	Homo sapiens	CLIP-seq	starBase	None	0.5483
RAID00032922	mmu-mir-1906-1	miRNA	MI0008321	Mus musculus	Ptbp2	protein	56195	Mus musculus	CLIP-seq	starBase	None	0.5483
RAID00033534	hsa-miR-3127-5p	miRNA	MIMAT0014990	Homo sapiens	DGCR8	protein	54487	Homo sapiens	CLIP-seq	starBase	None	0.5483
RAID00033666	hsa-miR-548k	miRNA	MIMAT0005882	Homo sapiens	DGCR8	protein	54487	Homo sapiens	CLIP-seq	starBase	None	0.5483
RAID00035665	hsa-let-7a-2	miRNA	MI0000061	Homo sapiens	LIN28B	protein	389421	Homo sapiens	CLIP-seq	starBase	None	0.5483
RAID00038346	hsa-miR-3173-3p	miRNA	MIMAT0015048	Homo sapiens	DGCR8	protein	54487	Homo sapiens	CLIP-seq	starBase	None	0.5483
RAID00039037	hsa-miR-551a	miRNA	MIMAT0003214	Homo sapiens	DGCR8	protein	54487	Homo sapiens	CLIP-seq	starBase	None	0.5483
RAID00040685	mmu-miR-135b-5p	miRNA	MIMAT0000612	Mus musculus	Fus	protein	233908	Mus musculus	CLIP-seq	starBase	None	0.5483
RAID00043680	hsa-miR-204-5p	miRNA	MIMAT0000265	Homo sapiens	DGCR8	protein	54487	Homo sapiens	CLIP-seq	starBase	None	0.5483
RAID00045237	hsa-miR-1304-5p	miRNA	MIMAT0005892	Homo sapiens	U2AF2	protein	11338	Homo sapiens	CLIP-seq	starBase	None	0.5483
RAID00050362	hsa-miR-126-3p	miRNA	MIMAT0000445	Homo sapiens	RTCB	protein	51493	Homo sapiens	CLIP-seq	starBase	None	0.5483
RAID00050705	hsa-mir-7-1	miRNA	MI0000263	Homo sapiens	FUS	protein	2521	Homo sapiens	CLIP-seq	starBase	None	0.5483
RAID00052460	hsa-miR-20a-5p	miRNA	MIMAT0000075	Homo sapiens	PTBP1	protein	5725	Homo sapiens	CLIP-seq	starBase	None	0.5483
RAID00053125	hsa-miR-130b-3p	miRNA	MIMAT0000691	Homo sapiens	NRP1	protein	8829	Homo sapiens	Microarray	RAID	26573160	0.5483
RAID00054629	hsa-mir-219a-1	miRNA	MI0000296	Homo sapiens	FUS	protein	2521	Homo sapiens	CLIP-seq	starBase	None	0.5483
RAID00054963	hsa-miR-1180-3p	miRNA	MIMAT0005825	Homo sapiens	DGCR8	protein	54487	Homo sapiens	CLIP-seq	starBase	None	0.5483
RAID00056027	mmu-miR-448-3p	miRNA	MIMAT0001533	Mus musculus	Fus	protein	233908	Mus musculus	CLIP-seq	starBase	None	0.5483
RAID00059308	hsa-mir-371b	miRNA	MI0017393	Homo sapiens	DGCR8	protein	54487	Homo sapiens	CLIP-seq	starBase	None	0.5483
RAID00064498	hsa-miR-501-5p	miRNA	MIMAT0002872	Homo sapiens	FUS	protein	2521	Homo sapiens	CLIP-seq	starBase	None	0.5483
RAID00065849	hsa-miR-663b	miRNA	MIMAT0005867	Homo sapiens	EIF4A3	protein	9775	Homo sapiens	CLIP-seq	starBase	None	0.5483
RAID00068491	hsa-miR-555	miRNA	MIMAT0003219	Homo sapiens	ELAVL1	protein	1994	Homo sapiens	CLIP-seq	starBase	None	0.5483
RAID00068741	hsa-miR-1909-3p	miRNA	MIMAT0007883	Homo sapiens	EIF4A3	protein	9775	Homo sapiens	CLIP-seq	starBase	None	0.5483
RAID00076067	hsa-mir-3179-1	miRNA	MI0014213	Homo sapiens	UPF1	protein	5976	Homo sapiens	CLIP-seq	starBase	None	0.5483
RAID00083062	hsa-miR-374b-5p	miRNA	MIMAT0004955	Homo sapiens	LIN28B	protein	389421	Homo sapiens	CLIP-seq	starBase	None	0.5483
RAID00084119	hsa-miR-23a-3p	miRNA	MIMAT0000078	Homo sapiens	MYC	protein	4609	Homo sapiens	Northern Blot//RT-PCR	RAID	19219026	0.8808
RAID00085167	hsa-miR-192-5p	miRNA	MIMAT0000222	Homo sapiens	DGCR8	protein	54487	Homo sapiens	CLIP-seq	starBase	None	0.5483
RAID00085232	hsa-mir-4667	miRNA	MI0017297	Homo sapiens	U2AF2	protein	11338	Homo sapiens	CLIP-seq	starBase	None	0.5483
RAID00089200	hsa-let-7a-5p	miRNA	MIMAT0000062	Homo sapiens	LIN28A	protein	79727	Homo sapiens	IP (immunoprecipitation)//EMSA (electrophoretic mobility shift assay)//RT-PCR//Western Blot//CLIP	NPInter//RAID	18951094//20178735//22959275//26440890	0.9919
RAID00090820	hsa-mir-3687-1	miRNA	MI0016088	Homo sapiens	EIF4A3	protein	9775	Homo sapiens	CLIP-seq	starBase	None	0.5483
RAID00091044	hsa-miR-224-5p	miRNA	MIMAT0000281	Homo sapiens	EIF4A3	protein	9775	Homo sapiens	CLIP-seq	starBase	None	0.5483
RAID00091058	mmu-miR-30a-5p	miRNA	MIMAT0000128	Mus musculus	Ptbp2	protein	56195	Mus musculus	CLIP-seq	starBase	None	0.5483
RAID00092160	hsa-miR-4511	miRNA	MIMAT0019048	Homo sapiens	DGCR8	protein	54487	Homo sapiens	CLIP-seq	starBase	None	0.5483
RAID00093968	hsa-miR-145-5p	miRNA	MIMAT0000437	Homo sapiens	LIN28A	protein	79727	Homo sapiens	CLIP-seq	starBase	None	0.5483
RAID00096255	hsa-mir-3687-1	miRNA	MI0016088	Homo sapiens	RTCB	protein	51493	Homo sapiens	CLIP-seq	starBase	None	0.5483
RAID00096681	hsa-miR-26b-5p	miRNA	MIMAT0000083	Homo sapiens	DGCR8	protein	54487	Homo sapiens	CLIP-seq	starBase	None	0.5483
RAID00097647	hsa-miR-4479	miRNA	MIMAT0019011	Homo sapiens	EIF4A3	protein	9775	Homo sapiens	CLIP-seq	starBase	None	0.5483
RAID00103232	hsa-miR-4489	miRNA	MIMAT0019023	Homo sapiens	EIF4A3	protein	9775	Homo sapiens	CLIP-seq	starBase	None	0.5483
RAID00103767	hsa-mir-3607	miRNA	MI0015997	Homo sapiens	RTCB	protein	51493	Homo sapiens	CLIP-seq	starBase	None	0.5483
RAID00104266	hsa-miR-663a	miRNA	MIMAT0003326	Homo sapiens	ALKBH5	protein	54890	Homo sapiens	CLIP-seq	starBase	None	0.5483
RAID00104577	hsa-mir-103a-1	miRNA	MI0000109	Homo sapiens	DGCR8	protein	54487	Homo sapiens	CLIP-seq	starBase	None	0.5483
RAID00106027	hsa-miR-708-5p	miRNA	MIMAT0004926	Homo sapiens	DGCR8	protein	54487	Homo sapiens	CLIP-seq	starBase	None	0.5483
RAID00107196	cel-let-7-5p	miRNA	MIMAT0000001	Caenorhabditis elegans	vig-1	protein	173512	Caenorhabditis elegans	RNA interference//IP (immunoprecipitation)	NPInter	14508492	0.8808
RAID00108992	hsa-mir-4446	miRNA	MI0016789	Homo sapiens	DGCR8	protein	54487	Homo sapiens	CLIP-seq	starBase	None	0.5483
RAID00110899	hsa-miR-193b-3p	miRNA	MIMAT0002819	Homo sapiens	LIN28A	protein	79727	Homo sapiens	CLIP-seq//CLIP	NPInter//starBase	22959275	0.6606
RAID00112035	hsa-miR-4473	miRNA	MIMAT0019000	Homo sapiens	DGCR8	protein	54487	Homo sapiens	CLIP-seq	starBase	None	0.5483
RAID00112917	hsa-miR-21-5p	miRNA	MIMAT0000076	Homo sapiens	DGCR8	protein	54487	Homo sapiens	CLIP-seq	starBase	None	0.5483
RAID00118910	hsa-miR-652-3p	miRNA	MIMAT0003322	Homo sapiens	LIN28B	protein	389421	Homo sapiens	CLIP-seq	starBase	None	0.5483
RAID00118995	hsa-miR-96-5p	miRNA	MIMAT0000095	Homo sapiens	FMR1	protein	2332	Homo sapiens	CLIP-seq	starBase	None	0.5483
RAID00119236	hsa-mir-4720	miRNA	MI0017355	Homo sapiens	EWSR1	protein	2130	Homo sapiens	CLIP-seq	starBase	None	0.5483
RAID00123365	hsa-miR-660-5p	miRNA	MIMAT0003338	Homo sapiens	LIN28A	protein	79727	Homo sapiens	CLIP-seq	starBase	None	0.5483
RAID00124341	hsa-miR-3620-3p	miRNA	MIMAT0018001	Homo sapiens	IGF2BP2	protein	10644	Homo sapiens	CLIP-seq	starBase	None	0.5483
RAID00124813	mmu-miR-193a-3p	miRNA	MIMAT0000223	Mus musculus	Fus	protein	233908	Mus musculus	CLIP-seq	starBase	None	0.5483
RAID00126666	hsa-miR-107	miRNA	MIMAT0000104	Homo sapiens	HNRNPA1	protein	3178	Homo sapiens	IP (immunoprecipitation)//RT-PCR	RAID	26494299	0.8808
RAID00127446	hsa-miR-30d-5p	miRNA	MIMAT0000245	Homo sapiens	FXR1	protein	8087	Homo sapiens	CLIP-seq	starBase	None	0.5483
RAID00127639	hsa-miR-23a-3p	miRNA	MIMAT0000078	Homo sapiens	LIN28A	protein	79727	Homo sapiens	CLIP-seq	starBase	None	0.5483
RAID00132191	mmu-miR-184-3p	miRNA	MIMAT0000213	Mus musculus	Slc25a22	protein	68267	Mus musculus	Western Blot//RT-PCR	RAID	26152724	0.8808
RAID00132512	mmu-miR-505-3p	miRNA	MIMAT0003513	Mus musculus	Fus	protein	233908	Mus musculus	CLIP-seq	starBase	None	0.5483
RAID00135985	hsa-miR-200c-3p	miRNA	MIMAT0000617	Homo sapiens	LIN28B	protein	389421	Homo sapiens	CLIP-seq	starBase	None	0.5483
RAID00138569	hsa-mir-92a-1	miRNA	MI0000093	Homo sapiens	FXR1	protein	8087	Homo sapiens	CLIP-seq	starBase	None	0.5483
RAID00141437	hsa-mir-222	miRNA	MI0000299	Homo sapiens	ADARB1	protein	104	Homo sapiens	RT-PCR//Northern Blot	RAID	25582055	0.8808
RAID00142829	hsa-miR-320e	miRNA	MIMAT0015072	Homo sapiens	IGF2BP1	protein	10642	Homo sapiens	CLIP-seq	starBase	None	0.5483
RAID00143307	hsa-mir-425	miRNA	MI0001448	Homo sapiens	FXR1	protein	8087	Homo sapiens	CLIP-seq	starBase	None	0.5483
RAID00145738	hsa-miR-4306	miRNA	MIMAT0016858	Homo sapiens	EIF4A3	protein	9775	Homo sapiens	CLIP-seq	starBase	None	0.5483
RAID00148972	hsa-mir-769	miRNA	MI0003834	Homo sapiens	EIF4A3	protein	9775	Homo sapiens	CLIP-seq	starBase	None	0.5483
RAID00149155	hsa-miR-193b-3p	miRNA	MIMAT0002819	Homo sapiens	RTCB	protein	51493	Homo sapiens	CLIP-seq	starBase	None	0.5483
RAID00150488	hsa-miR-1287-5p	miRNA	MIMAT0005878	Homo sapiens	FUS	protein	2521	Homo sapiens	CLIP-seq	starBase	None	0.5483
RAID00151994	hsa-miR-125a-5p	miRNA	MIMAT0000443	Homo sapiens	LIN28A	protein	79727	Homo sapiens	CLIP-seq//CLIP	NPInter//starBase	22959275	0.6606
RAID00160933	mmu-let-7d	miRNA	MI0000405	Mus musculus	Lin28a	protein	83557	Mus musculus	Western Blot//EMSA (electrophoretic mobility shift assay)//RT-PCR//Nuclear magnetic resonance	RAID	22078496	0.982
RAID00162382	hsa-miR-873-5p	miRNA	MIMAT0004953	Homo sapiens	FUS	protein	2521	Homo sapiens	CLIP-seq	starBase	None	0.5483
RAID00162732	hsa-miR-191-5p	miRNA	MIMAT0000440	Homo sapiens	FMR1	protein	2332	Homo sapiens	CLIP-seq	starBase	None	0.5483
RAID00162930	hsa-miR-1231	miRNA	MIMAT0005586	Homo sapiens	EIF4A3	protein	9775	Homo sapiens	CLIP-seq	starBase	None	0.5483
RAID00170473	hsa-miR-762	miRNA	MIMAT0010313	Homo sapiens	EIF4A3	protein	9775	Homo sapiens	CLIP-seq	starBase	None	0.5483
RAID00170851	hsa-miR-638	miRNA	MIMAT0003308	Homo sapiens	DGCR8	protein	54487	Homo sapiens	CLIP-seq	starBase	None	0.5483
RAID00172667	hsa-miR-23a-3p	miRNA	MIMAT0000078	Homo sapiens	FUS	protein	2521	Homo sapiens	CLIP-seq	starBase	None	0.5483
RAID00180039	hsa-miR-877-5p	miRNA	MIMAT0004949	Homo sapiens	LIN28A	protein	79727	Homo sapiens	CLIP	NPInter	22959275	0.5483
RAID00180086	hsa-mir-365a	miRNA	MI0000767	Homo sapiens	EIF4A3	protein	9775	Homo sapiens	CLIP-seq	starBase	None	0.5483
RAID00181836	hsa-miR-31-5p	miRNA	MIMAT0000089	Homo sapiens	EWSR1	protein	2130	Homo sapiens	CLIP	NPInter	24813895	0.5483
RAID00182015	mmu-miR-100-5p	miRNA	MIMAT0000655	Mus musculus	Cirbp	protein	12696	Mus musculus	CLIP-seq	starBase	None	0.5483
RAID00186759	hsa-miR-27b-3p	miRNA	MIMAT0000419	Homo sapiens	FXR1	protein	8087	Homo sapiens	CLIP-seq	starBase	None	0.5483
RAID00188714	hsa-mir-4732	miRNA	MI0017369	Homo sapiens	LIN28B	protein	389421	Homo sapiens	CLIP-seq	starBase	None	0.5483
RAID00190500	hsa-mir-4687	miRNA	MI0017319	Homo sapiens	DGCR8	protein	54487	Homo sapiens	CLIP-seq	starBase	None	0.5483
RAID00191180	hsa-miR-185-5p	miRNA	MIMAT0000455	Homo sapiens	LIN28B	protein	389421	Homo sapiens	CLIP-seq	starBase	None	0.5483
RAID00192784	hsa-mir-3614	miRNA	MI0016004	Homo sapiens	TIAL1	protein	7073	Homo sapiens	CLIP-seq	starBase	None	0.5483
RAID00196838	hsa-miR-302a-5p	miRNA	MIMAT0000683	Homo sapiens	LIN28A	protein	79727	Homo sapiens	CLIP	NPInter	22959275	0.5483
RAID00199351	hsa-miR-3175	miRNA	MIMAT0015052	Homo sapiens	EIF4A3	protein	9775	Homo sapiens	CLIP-seq	starBase	None	0.5483
RAID00199894	hsa-miR-3200-3p	miRNA	MIMAT0015085	Homo sapiens	IGF2BP2	protein	10644	Homo sapiens	CLIP-seq	starBase	None	0.5483
RAID00202454	hsa-miR-1281	miRNA	MIMAT0005939	Homo sapiens	LIN28A	protein	79727	Homo sapiens	CLIP-seq	starBase	None	0.5483
RAID00202843	hsa-miR-3916	miRNA	MIMAT0018190	Homo sapiens	U2AF2	protein	11338	Homo sapiens	CLIP-seq	starBase	None	0.5483
RAID00206927	hsa-miR-221-3p	miRNA	MIMAT0000278	Homo sapiens	DDIT4	protein	54541	Homo sapiens	Reporter Assay//RT-PCR//Western Blot//Microarray	RAID	20018759	0.9786
RAID00207003	hsa-miR-374b-5p	miRNA	MIMAT0004955	Homo sapiens	FUS	protein	2521	Homo sapiens	CLIP-seq	starBase	None	0.5483
RAID00208610	hsa-miR-1248	miRNA	MIMAT0005900	Homo sapiens	LIN28A	protein	79727	Homo sapiens	CLIP	NPInter	22959275	0.5483
RAID00209260	mmu-mir-103-2	miRNA	MI0000588	Mus musculus	Fus	protein	233908	Mus musculus	CLIP-seq	starBase	None	0.5483
RAID00211175	hsa-miR-195-5p	miRNA	MIMAT0000461	Homo sapiens	FUS	protein	2521	Homo sapiens	CLIP-seq	starBase	None	0.5483
RAID00212432	hsa-mir-6723	miRNA	MI0022558	Homo sapiens	IGF2BP3	protein	10643	Homo sapiens	CLIP-seq	starBase	None	0.5483
RAID00213929	hsa-miR-1-3p	miRNA	MIMAT0000416	Homo sapiens	PIM1	protein	5292	Homo sapiens	RT-PCR//Reporter Assay//Western Blot	RAID	18818206	0.9526
RAID00222451	mmu-miR-541-5p	miRNA	MIMAT0003170	Mus musculus	Fus	protein	233908	Mus musculus	CLIP-seq	starBase	None	0.5483
RAID00224165	hsa-miR-652-3p	miRNA	MIMAT0003322	Homo sapiens	FXR1	protein	8087	Homo sapiens	CLIP-seq	starBase	None	0.5483
RAID00224624	hsa-miR-3176	miRNA	MIMAT0015053	Homo sapiens	FMR1	protein	2332	Homo sapiens	CLIP-seq	starBase	None	0.5483
RAID00225802	hsa-let-7g-5p	miRNA	MIMAT0000414	Homo sapiens	FXR1	protein	8087	Homo sapiens	CLIP-seq	starBase	None	0.5483
RAID00228452	hsa-miR-17-5p	miRNA	MIMAT0000070	Homo sapiens	UPF1	protein	5976	Homo sapiens	CLIP-seq	starBase	None	0.5483
RAID00231511	hsa-miR-106b-5p	miRNA	MIMAT0000680	Homo sapiens	DGCR8	protein	54487	Homo sapiens	CLIP-seq	starBase	None	0.5483
RAID00234324	hsa-let-7f-1	miRNA	MI0000067	Homo sapiens	LIN28A	protein	79727	Homo sapiens	CLIP-seq	starBase	None	0.5483
RAID00235079	hsa-miR-136-5p	miRNA	MIMAT0000448	Homo sapiens	LIN28B	protein	389421	Homo sapiens	CLIP-seq	starBase	None	0.5483
RAID00235939	hsa-miR-33a-5p	miRNA	MIMAT0000091	Homo sapiens	LIN28A	protein	79727	Homo sapiens	CLIP-seq	starBase	None	0.5483
RAID00239198	hsa-mir-4709	miRNA	MI0017342	Homo sapiens	FUS	protein	2521	Homo sapiens	CLIP-seq	starBase	None	0.5483
RAID00240184	hsa-miR-378i	miRNA	MIMAT0019074	Homo sapiens	DGCR8	protein	54487	Homo sapiens	CLIP-seq	starBase	None	0.5483
RAID00241285	hsa-mir-194-2	miRNA	MI0000732	Homo sapiens	DGCR8	protein	54487	Homo sapiens	CLIP-seq	starBase	None	0.5483
RAID00241576	mmu-miR-19a-3p	miRNA	MIMAT0000651	Mus musculus	Fus	protein	233908	Mus musculus	CLIP-seq	starBase	None	0.5483
RAID00245868	mmu-mir-434	miRNA	MI0001526	Mus musculus	Fus	protein	233908	Mus musculus	CLIP-seq	starBase	None	0.5483
RAID00245922	hsa-miR-21-5p	miRNA	MIMAT0000076	Homo sapiens	RTCB	protein	51493	Homo sapiens	CLIP-seq	starBase	None	0.5483
RAID00249512	hsa-miR-221-3p	miRNA	MIMAT0000278	Homo sapiens	ZFP36	protein	7538	Homo sapiens	RIP (RNA Immunoprecipitation)//Western Blot//Reporter Assay//RT-PCR	RAID	20435889	0.982
RAID00249700	hsa-miR-22-3p	miRNA	MIMAT0000077	Homo sapiens	DGCR8	protein	54487	Homo sapiens	CLIP-seq	starBase	None	0.5483
RAID00251006	hsa-miR-186-5p	miRNA	MIMAT0000456	Homo sapiens	U2AF2	protein	11338	Homo sapiens	CLIP-seq	starBase	None	0.5483
RAID00253624	hsa-miR-221-3p	miRNA	MIMAT0000278	Homo sapiens	EIF4A3	protein	9775	Homo sapiens	CLIP-seq	starBase	None	0.5483
RAID00253795	hsa-miR-34c-5p	miRNA	MIMAT0000686	Homo sapiens	LIN28A	protein	79727	Homo sapiens	CLIP	NPInter	22959275	0.5483
RAID00254424	hsa-miR-29b-3p	miRNA	MIMAT0000100	Homo sapiens	CDK6	protein	1021	Homo sapiens	Reporter Assay//RT-PCR//Western Blot	RAID	20086245	0.9526
RAID00256163	hsa-miR-6080	miRNA	MIMAT0023705	Homo sapiens	IGF2BP3	protein	10643	Homo sapiens	CLIP-seq	starBase	None	0.5483
RAID00256966	hsa-miR-106b-3p	miRNA	MIMAT0004672	Homo sapiens	LIN28A	protein	79727	Homo sapiens	CLIP	NPInter	22959275	0.5483
RAID00257338	hsa-miR-1304-5p	miRNA	MIMAT0005892	Homo sapiens	HNRNPC	protein	3183	Homo sapiens	CLIP-seq	starBase	None	0.5483
RAID00259385	hsa-miR-4453	miRNA	MIMAT0018975	Homo sapiens	EIF4A3	protein	9775	Homo sapiens	CLIP-seq	starBase	None	0.5483
RAID00260683	hsa-miR-584-5p	miRNA	MIMAT0003249	Homo sapiens	HNRNPA1	protein	3178	Homo sapiens	IP (immunoprecipitation)//RT-PCR	RAID	26494299	0.8808
RAID00263981	hsa-mir-135a-2	miRNA	MI0000453	Homo sapiens	FUS	protein	2521	Homo sapiens	CLIP-seq	starBase	None	0.5483
RAID00264483	hsa-mir-4761	miRNA	MI0017402	Homo sapiens	FMR1	protein	2332	Homo sapiens	CLIP-seq	starBase	None	0.5483
RAID00264800	hsa-miR-30a-5p	miRNA	MIMAT0000087	Homo sapiens	PTBP1	protein	5725	Homo sapiens	CLIP-seq	starBase	None	0.5483
RAID00265627	hsa-miR-298	miRNA	MIMAT0004901	Homo sapiens	DGCR8	protein	54487	Homo sapiens	CLIP-seq	starBase	None	0.5483
RAID00268035	hsa-mir-181a-1	miRNA	MI0000289	Homo sapiens	LIN28A	protein	79727	Homo sapiens	CLIP-seq	starBase	None	0.5483
RAID00268770	hsa-miR-582-5p	miRNA	MIMAT0003247	Homo sapiens	EIF4A3	protein	9775	Homo sapiens	CLIP-seq	starBase	None	0.5483
RAID00269912	hsa-miR-3652	miRNA	MIMAT0018072	Homo sapiens	UPF1	protein	5976	Homo sapiens	CLIP-seq	starBase	None	0.5483
RAID00270623	hsa-miR-615-5p	miRNA	MIMAT0004804	Homo sapiens	LIN28A	protein	79727	Homo sapiens	CLIP	NPInter	22959275	0.5483
RAID00270772	hsa-mir-194-1	miRNA	MI0000488	Homo sapiens	DGCR8	protein	54487	Homo sapiens	CLIP-seq	starBase	None	0.5483
RAID00270895	hsa-miR-106b-5p	miRNA	MIMAT0000680	Homo sapiens	FMR1	protein	2332	Homo sapiens	CLIP-seq	starBase	None	0.5483
RAID00272459	hsa-mir-30c-1	miRNA	MI0000736	Homo sapiens	FUS	protein	2521	Homo sapiens	CLIP-seq	starBase	None	0.5483
RAID00273061	hsa-miR-210-3p	miRNA	MIMAT0000267	Homo sapiens	LIN28A	protein	79727	Homo sapiens	CLIP-seq	starBase	None	0.5483
RAID00277328	hsa-mir-181a-2	miRNA	MI0000269	Homo sapiens	PTBP1	protein	5725	Homo sapiens	CLIP-seq	starBase	None	0.5483
RAID00278777	hsa-miR-93-5p	miRNA	MIMAT0000093	Homo sapiens	FMR1	protein	2332	Homo sapiens	CLIP-seq	starBase	None	0.5483
RAID00281167	hsa-miR-3917	miRNA	MIMAT0018191	Homo sapiens	FUS	protein	2521	Homo sapiens	CLIP-seq	starBase	None	0.5483
RAID00281689	hsa-miR-503-5p	miRNA	MIMAT0002874	Homo sapiens	LIN28A	protein	79727	Homo sapiens	CLIP-seq	starBase	None	0.5483
RAID00284698	hsa-miR-375	miRNA	MIMAT0000728	Homo sapiens	FXR1	protein	8087	Homo sapiens	CLIP-seq	starBase	None	0.5483
RAID00285025	hsa-miR-877-5p	miRNA	MIMAT0004949	Homo sapiens	EIF4A3	protein	9775	Homo sapiens	CLIP-seq	starBase	None	0.5483
RAID00286242	hsa-miR-611	miRNA	MIMAT0003279	Homo sapiens	EIF4A3	protein	9775	Homo sapiens	CLIP-seq	starBase	None	0.5483
RAID00288891	hsa-miR-1227-3p	miRNA	MIMAT0005580	Homo sapiens	U2AF2	protein	11338	Homo sapiens	CLIP-seq	starBase	None	0.5483
RAID00290273	hsa-miR-3609	miRNA	MIMAT0017986	Homo sapiens	QKI	protein	9444	Homo sapiens	CLIP-seq	starBase	None	0.5483
RAID00292401	hsa-miR-320a	miRNA	MIMAT0000510	Homo sapiens	FMR1	protein	2332	Homo sapiens	CLIP-seq	starBase	None	0.5483
RAID00292819	hsa-miR-1292-5p	miRNA	MIMAT0005943	Homo sapiens	EIF4A3	protein	9775	Homo sapiens	CLIP-seq	starBase	None	0.5483
RAID00292867	mmu-miR-125b-5p	miRNA	MIMAT0000136	Mus musculus	Tial1	protein	21843	Mus musculus	RIP (RNA Immunoprecipitation)//Western Blot//Reporter Assay//RT-PCR	RAID	20435889	0.982
RAID00295357	ath-MIR172b	miRNA	MI0000216	Arabidopsis thaliana	DCL1	protein	839574	Arabidopsis thaliana	RIP (RNA Immunoprecipitation)//EMSA (electrophoretic mobility shift assay)//RT-PCR	RAID	26473486	0.9526
RAID00298424	hsa-miR-564	miRNA	MIMAT0003228	Homo sapiens	IGF2BP1	protein	10642	Homo sapiens	CLIP-seq	starBase	None	0.5483
RAID00298603	hsa-mir-30c-2	miRNA	MI0000254	Homo sapiens	EIF4A3	protein	9775	Homo sapiens	CLIP-seq	starBase	None	0.5483
RAID00300409	hsa-miR-663a	miRNA	MIMAT0003326	Homo sapiens	RTCB	protein	51493	Homo sapiens	CLIP-seq	starBase	None	0.5483
RAID00302328	hsa-mir-340	miRNA	MI0000802	Homo sapiens	FUS	protein	2521	Homo sapiens	CLIP-seq	starBase	None	0.5483
RAID00303666	hsa-miR-301a-3p	miRNA	MIMAT0000688	Homo sapiens	FMR1	protein	2332	Homo sapiens	CLIP-seq	starBase	None	0.5483
RAID00304295	hsa-miR-27a-3p	miRNA	MIMAT0000084	Homo sapiens	TIAL1	protein	7073	Homo sapiens	CLIP-seq	starBase	None	0.5483
RAID00304686	hsa-miR-22-3p	miRNA	MIMAT0000077	Homo sapiens	FMR1	protein	2332	Homo sapiens	CLIP-seq	starBase	None	0.5483
RAID00306350	ath-miR398a-3p	miRNA	MIMAT0000948	Arabidopsis thaliana	FCA	protein	827323	Arabidopsis thaliana	RIP (RNA Immunoprecipitation)//EMSA (electrophoretic mobility shift assay)//RT-PCR//Pull down Assay	RAID	22431732	0.982
RAID00308819	hsa-miR-93-5p	miRNA	MIMAT0000093	Homo sapiens	TIAL1	protein	7073	Homo sapiens	CLIP-seq	starBase	None	0.5483
RAID00310348	hsa-let-7a-2	miRNA	MI0000061	Homo sapiens	DGCR8	protein	54487	Homo sapiens	CLIP-seq	starBase	None	0.5483
RAID00312206	hsa-mir-7-3	miRNA	MI0000265	Homo sapiens	FUS	protein	2521	Homo sapiens	CLIP-seq	starBase	None	0.5483
RAID00312709	hsa-miR-3609	miRNA	MIMAT0017986	Homo sapiens	EIF4A3	protein	9775	Homo sapiens	CLIP-seq	starBase	None	0.5483
RAID00313509	hsa-miR-4657	miRNA	MIMAT0019724	Homo sapiens	ELAVL1	protein	1994	Homo sapiens	CLIP-seq	starBase	None	0.5483
RAID00315438	hsa-miR-222-3p	miRNA	MIMAT0000279	Homo sapiens	EIF4A3	protein	9775	Homo sapiens	CLIP-seq	starBase	None	0.5483
RAID00322123	hsa-mir-3198-2	miRNA	MI0017335	Homo sapiens	ELAVL1	protein	1994	Homo sapiens	CLIP-seq	starBase	None	0.5483
RAID00324797	hsa-miR-301b-3p	miRNA	MIMAT0004958	Homo sapiens	NCBP3	protein	55421	Homo sapiens	CLIP-seq	starBase	None	0.5483
RAID00325079	hsa-miR-4517	miRNA	MIMAT0019054	Homo sapiens	U2AF2	protein	11338	Homo sapiens	CLIP-seq	starBase	None	0.5483
RAID00327735	hsa-miR-199b-5p	miRNA	MIMAT0000263	Homo sapiens	LIN28A	protein	79727	Homo sapiens	CLIP-seq	starBase	None	0.5483
RAID00329505	hsa-miR-3609	miRNA	MIMAT0017986	Homo sapiens	FUS	protein	2521	Homo sapiens	CLIP-seq	starBase	None	0.5483
RAID00330666	hsa-miR-103a-2-5p	miRNA	MIMAT0009196	Homo sapiens	LIN28A	protein	79727	Homo sapiens	CLIP	NPInter	22959275	0.5483
RAID00333745	hsa-miR-28-5p	miRNA	MIMAT0000085	Homo sapiens	LIN28A	protein	79727	Homo sapiens	CLIP-seq	starBase	None	0.5483
RAID00336425	hsa-miR-1307-3p	miRNA	MIMAT0005951	Homo sapiens	FMR1	protein	2332	Homo sapiens	CLIP-seq	starBase	None	0.5483
RAID00345268	hsa-miR-4286	miRNA	MIMAT0016916	Homo sapiens	DGCR8	protein	54487	Homo sapiens	CLIP-seq	starBase	None	0.5483
RAID00345677	hsa-mir-488	miRNA	MI0003123	Homo sapiens	DGCR8	protein	54487	Homo sapiens	CLIP-seq	starBase	None	0.5483
RAID00345981	hsa-miR-224-5p	miRNA	MIMAT0000281	Homo sapiens	DGCR8	protein	54487	Homo sapiens	CLIP-seq	starBase	None	0.5483
RAID00347366	hsa-miR-125a-5p	miRNA	MIMAT0000443	Homo sapiens	RTCB	protein	51493	Homo sapiens	CLIP-seq	starBase	None	0.5483
RAID00349810	hsa-miR-34c-5p	miRNA	MIMAT0000686	Homo sapiens	FUS	protein	2521	Homo sapiens	CLIP-seq	starBase	None	0.5483
RAID00350635	hsa-mir-4720	miRNA	MI0017355	Homo sapiens	FMR1	protein	2332	Homo sapiens	CLIP-seq	starBase	None	0.5483
RAID00353246	hsa-mir-3607	miRNA	MI0015997	Homo sapiens	EIF4A3	protein	9775	Homo sapiens	CLIP-seq	starBase	None	0.5483
RAID00355072	hsa-miR-4532	miRNA	MIMAT0019071	Homo sapiens	EIF4A3	protein	9775	Homo sapiens	CLIP-seq	starBase	None	0.5483
RAID00355827	hsa-miR-454-3p	miRNA	MIMAT0003885	Homo sapiens	FMR1	protein	2332	Homo sapiens	CLIP-seq	starBase	None	0.5483
RAID00357016	hsa-miR-30e-5p	miRNA	MIMAT0000692	Homo sapiens	EIF4A3	protein	9775	Homo sapiens	CLIP-seq	starBase	None	0.5483
RAID00358045	hsa-miR-3615	miRNA	MIMAT0017994	Homo sapiens	ELAVL1	protein	1994	Homo sapiens	CLIP-seq	starBase	None	0.5483
RAID00361653	xtr-let-7a	miRNA	MI0004908	Xenopus (Silurana) tropicalis	lin28a	protein	548523	Xenopus (Silurana) tropicalis	EMSA (electrophoretic mobility shift assay)	RAID	22570413	0.7311
RAID00361905	mmu-miR-93-5p	miRNA	MIMAT0000540	Mus musculus	Fus	protein	233908	Mus musculus	CLIP-seq	starBase	None	0.5483
RAID00364655	hsa-mir-181a-1	miRNA	MI0000289	Homo sapiens	FMR1	protein	2332	Homo sapiens	CLIP-seq	starBase	None	0.5483
RAID00366569	hsa-miR-27a-3p	miRNA	MIMAT0000084	Homo sapiens	AGO2	protein	27161	Homo sapiens	Northern Blot//IP (immunoprecipitation)	RAID	22844086	0.8808
RAID00368314	hsa-mir-4697	miRNA	MI0017330	Homo sapiens	FXR2	protein	9513	Homo sapiens	CLIP-seq	starBase	None	0.5483
RAID00368505	hsa-miR-539-5p	miRNA	MIMAT0003163	Homo sapiens	FUS	protein	2521	Homo sapiens	CLIP-seq	starBase	None	0.5483
RAID00377612	hsa-miR-3655	miRNA	MIMAT0018075	Homo sapiens	EIF4A3	protein	9775	Homo sapiens	CLIP-seq	starBase	None	0.5483
RAID00381683	hsa-miR-615-3p	miRNA	MIMAT0003283	Homo sapiens	RTCB	protein	51493	Homo sapiens	CLIP-seq	starBase	None	0.5483
RAID00385199	hsa-mir-769	miRNA	MI0003834	Homo sapiens	DGCR8	protein	54487	Homo sapiens	CLIP-seq	starBase	None	0.5483
RAID00385403	xtr-let-7g	miRNA	MI0004888	Xenopus (Silurana) tropicalis	lin28a	protein	548523	Xenopus (Silurana) tropicalis	EMSA (electrophoretic mobility shift assay)	RAID	22570413	0.7311
RAID00385852	hsa-mir-128-1	miRNA	MI0000447	Homo sapiens	DGCR8	protein	54487	Homo sapiens	CLIP-seq	starBase	None	0.5483
RAID00388409	mmu-mir-190a	miRNA	MI0000232	Mus musculus	Fus	protein	233908	Mus musculus	CLIP-seq	starBase	None	0.5483
RAID00390152	hsa-miR-29a-3p	miRNA	MIMAT0000086	Homo sapiens	FXR1	protein	8087	Homo sapiens	CLIP-seq	starBase	None	0.5483
RAID00391288	hsa-miR-4641	miRNA	MIMAT0019701	Homo sapiens	EIF4A3	protein	9775	Homo sapiens	CLIP-seq	starBase	None	0.5483
RAID00393174	hsa-miR-130a-3p	miRNA	MIMAT0000425	Homo sapiens	LIN28A	protein	79727	Homo sapiens	CLIP-seq	starBase	None	0.5483
RAID00393807	hsa-mir-548f-2	miRNA	MI0006375	Homo sapiens	FUS	protein	2521	Homo sapiens	CLIP-seq	starBase	None	0.5483
RAID00396615	hsa-miR-3618	miRNA	MIMAT0017998	Homo sapiens	PTBP1	protein	5725	Homo sapiens	CLIP-seq	starBase	None	0.5483
RAID00397844	hsa-mir-4700	miRNA	MI0017333	Homo sapiens	IGF2BP3	protein	10643	Homo sapiens	CLIP-seq	starBase	None	0.5483
RAID00398713	hsa-mir-125b-1	miRNA	MI0000446	Homo sapiens	FUS	protein	2521	Homo sapiens	CLIP-seq	starBase	None	0.5483
RAID00399543	hsa-miR-93-3p	miRNA	MIMAT0004509	Homo sapiens	LIN28A	protein	79727	Homo sapiens	CLIP	NPInter	22959275	0.5483
RAID00400012	mmu-miR-701-5p	miRNA	MIMAT0003491	Mus musculus	Fus	protein	233908	Mus musculus	CLIP-seq	starBase	None	0.5483
RAID00402044	hsa-miR-130b-3p	miRNA	MIMAT0000691	Homo sapiens	PTBP1	protein	5725	Homo sapiens	CLIP-seq	starBase	None	0.5483
RAID00402067	hsa-miR-301a-3p	miRNA	MIMAT0000688	Homo sapiens	FUS	protein	2521	Homo sapiens	CLIP-seq	starBase	None	0.5483
RAID00405236	ath-MIR172b	miRNA	MI0000216	Arabidopsis thaliana	CDF2	protein	833962	Arabidopsis thaliana	RIP (RNA Immunoprecipitation)//RT-PCR//EMSA (electrophoretic mobility shift assay)//Northern Blot	RAID	26473486	0.982
RAID00408068	hsa-miR-877-5p	miRNA	MIMAT0004949	Homo sapiens	IGF2BP1	protein	10642	Homo sapiens	CLIP-seq	starBase	None	0.5483
RAID00408360	hsa-miR-3650	miRNA	MIMAT0018070	Homo sapiens	EWSR1	protein	2130	Homo sapiens	CLIP	NPInter	24813895	0.5483
RAID00408806	hsa-miR-2110	miRNA	MIMAT0010133	Homo sapiens	FMR1	protein	2332	Homo sapiens	CLIP-seq	starBase	None	0.5483
RAID00410147	hsa-miR-424-5p	miRNA	MIMAT0001341	Homo sapiens	FMR1	protein	2332	Homo sapiens	CLIP-seq	starBase	None	0.5483
RAID00410518	hsa-mir-3614	miRNA	MI0016004	Homo sapiens	FMR1	protein	2332	Homo sapiens	CLIP-seq	starBase	None	0.5483
RAID00413999	hsa-miR-663a	miRNA	MIMAT0003326	Homo sapiens	FMR1	protein	2332	Homo sapiens	CLIP-seq	starBase	None	0.5483
RAID00417087	hsa-miR-5699-3p	miRNA	MIMAT0022492	Homo sapiens	DGCR8	protein	54487	Homo sapiens	CLIP-seq	starBase	None	0.5483
RAID00423262	hsa-miR-20a-5p	miRNA	MIMAT0000075	Homo sapiens	LIN28A	protein	79727	Homo sapiens	CLIP-seq//CLIP	NPInter//starBase	22959275	0.6606
RAID00424762	hsa-mir-103a-2	miRNA	MI0000108	Homo sapiens	EIF4A3	protein	9775	Homo sapiens	CLIP-seq	starBase	None	0.5483
RAID00425259	hsa-miR-3940-3p	miRNA	MIMAT0018356	Homo sapiens	PTBP1	protein	5725	Homo sapiens	CLIP-seq	starBase	None	0.5483
RAID00430281	rno-miR-107-3p	miRNA	MIMAT0000826	Rattus norvegicus	Cav1	protein	25404	Rattus norvegicus	Western Blot	RAID	26038570	0.7311
RAID00432357	hsa-mir-196a-2	miRNA	MI0000279	Homo sapiens	FMR1	protein	2332	Homo sapiens	CLIP-seq	starBase	None	0.5483
RAID00433110	hsa-miR-1976	miRNA	MIMAT0009451	Homo sapiens	TNRC6A	protein	27327	Homo sapiens	CLIP-seq	starBase	None	0.5483
RAID00435522	hsa-miR-555	miRNA	MIMAT0003219	Homo sapiens	EIF4A3	protein	9775	Homo sapiens	CLIP-seq	starBase	None	0.5483
RAID00435542	hsa-mir-3064	miRNA	MI0017375	Homo sapiens	DGCR8	protein	54487	Homo sapiens	CLIP-seq	starBase	None	0.5483
RAID00435656	mmu-miR-2137	miRNA	MIMAT0011213	Mus musculus	Srsf2	protein	20382	Mus musculus	CLIP-seq	starBase	None	0.5483
RAID00436675	hsa-miR-3609	miRNA	MIMAT0017986	Homo sapiens	LIN28A	protein	79727	Homo sapiens	CLIP-seq	starBase	None	0.5483
RAID00437489	hsa-miR-585-3p	miRNA	MIMAT0003250	Homo sapiens	DGCR8	protein	54487	Homo sapiens	CLIP-seq	starBase	None	0.5483
RAID00438037	hsa-miR-580-3p	miRNA	MIMAT0003245	Homo sapiens	DGCR8	protein	54487	Homo sapiens	CLIP-seq	starBase	None	0.5483
RAID00438103	hsa-mir-3616	miRNA	MI0016006	Homo sapiens	IGF2BP1	protein	10642	Homo sapiens	CLIP-seq	starBase	None	0.5483
RAID00438934	hsa-mir-1254-2	miRNA	MI0016747	Homo sapiens	DGCR8	protein	54487	Homo sapiens	CLIP-seq	starBase	None	0.5483
RAID00440570	hsa-miR-1234-3p	miRNA	MIMAT0005589	Homo sapiens	UPF1	protein	5976	Homo sapiens	CLIP-seq	starBase	None	0.5483
RAID00440779	hsa-mir-3613	miRNA	MI0016003	Homo sapiens	EIF4A3	protein	9775	Homo sapiens	CLIP-seq	starBase	None	0.5483
RAID00441733	hsa-miR-2355-5p	miRNA	MIMAT0016895	Homo sapiens	IGF2BP1	protein	10642	Homo sapiens	CLIP-seq	starBase	None	0.5483
RAID00442463	hsa-miR-3131	miRNA	MIMAT0014996	Homo sapiens	DGCR8	protein	54487	Homo sapiens	CLIP-seq	starBase	None	0.5483
RAID00443412	mmu-mir-138-2	miRNA	MI0000164	Mus musculus	Fus	protein	233908	Mus musculus	CLIP-seq	starBase	None	0.5483
RAID00443543	hsa-miR-10a-5p	miRNA	MIMAT0000253	Homo sapiens	IGF2BP1	protein	10642	Homo sapiens	CLIP-seq	starBase	None	0.5483
RAID00447303	mmu-miR-690	miRNA	MIMAT0003469	Mus musculus	Fus	protein	233908	Mus musculus	CLIP-seq	starBase	None	0.5483
RAID00447381	hsa-miR-29c-3p	miRNA	MIMAT0000681	Homo sapiens	EIF4A3	protein	9775	Homo sapiens	CLIP-seq	starBase	None	0.5483
RAID00448946	mmu-mir-3471-1	miRNA	MI0014699	Mus musculus	Ptbp2	protein	56195	Mus musculus	CLIP-seq	starBase	None	0.5483
RAID00450866	mmu-miR-5099	miRNA	MIMAT0020606	Mus musculus	Srsf1	protein	110809	Mus musculus	CLIP-seq	starBase	None	0.5483
RAID00451824	mmu-mir-21a	miRNA	MI0000569	Mus musculus	Srsf2	protein	20382	Mus musculus	CLIP-seq	starBase	None	0.5483
RAID00451908	hsa-miR-3610	miRNA	MIMAT0017987	Homo sapiens	EIF4A3	protein	9775	Homo sapiens	CLIP-seq	starBase	None	0.5483
RAID00454593	hsa-let-7i-5p	miRNA	MIMAT0000415	Homo sapiens	FMR1	protein	2332	Homo sapiens	CLIP-seq	starBase	None	0.5483
RAID00456048	hsa-miR-4516	miRNA	MIMAT0019053	Homo sapiens	FUS	protein	2521	Homo sapiens	CLIP-seq	starBase	None	0.5483
RAID00457041	hsa-miR-615-3p	miRNA	MIMAT0003283	Homo sapiens	FXR1	protein	8087	Homo sapiens	CLIP-seq	starBase	None	0.5483
RAID00460732	hsa-miR-186-5p	miRNA	MIMAT0000456	Homo sapiens	HNRNPC	protein	3183	Homo sapiens	CLIP-seq	starBase	None	0.5483
RAID00462608	hsa-mir-138-1	miRNA	MI0000476	Homo sapiens	PTBP1	protein	5725	Homo sapiens	CLIP-seq	starBase	None	0.5483
RAID00463041	hsa-miR-455-5p	miRNA	MIMAT0003150	Homo sapiens	FUS	protein	2521	Homo sapiens	CLIP-seq	starBase	None	0.5483
RAID00464064	hsa-miR-3618	miRNA	MIMAT0017998	Homo sapiens	EIF4A3	protein	9775	Homo sapiens	CLIP-seq	starBase	None	0.5483
RAID00464217	mmu-miR-186-5p	miRNA	MIMAT0000215	Mus musculus	Fus	protein	233908	Mus musculus	CLIP-seq	starBase	None	0.5483
RAID00464521	hsa-mir-3605	miRNA	MI0015995	Homo sapiens	TNRC6A	protein	27327	Homo sapiens	CLIP-seq	starBase	None	0.5483
RAID00468025	mmu-miR-410-3p	miRNA	MIMAT0001091	Mus musculus	Fus	protein	233908	Mus musculus	CLIP-seq	starBase	None	0.5483
RAID00470736	hsa-miR-181a-5p	miRNA	MIMAT0000256	Homo sapiens	PTPN11	protein	5781	Homo sapiens	Western Blot//Reporter Assay//RT-PCR	RAID	17382377	0.9526
RAID00472384	hsa-miR-186-5p	miRNA	MIMAT0000456	Homo sapiens	ELAVL1	protein	1994	Homo sapiens	CLIP-seq	starBase	None	0.5483
RAID00472561	hsa-miR-654-5p	miRNA	MIMAT0003330	Homo sapiens	FUS	protein	2521	Homo sapiens	CLIP-seq	starBase	None	0.5483
RAID00473186	hsa-miR-221-3p	miRNA	MIMAT0000278	Homo sapiens	CAPRIN1	protein	4076	Homo sapiens	CLIP-seq	starBase	None	0.5483
RAID00474606	hsa-miR-184	miRNA	MIMAT0000454	Homo sapiens	LIN28A	protein	79727	Homo sapiens	CLIP-seq	starBase	None	0.5483
RAID00475137	hsa-mir-4746	miRNA	MI0017385	Homo sapiens	EIF4A3	protein	9775	Homo sapiens	CLIP-seq	starBase	None	0.5483
RAID00477350	hsa-miR-200b-3p	miRNA	MIMAT0000318	Homo sapiens	LIN28B	protein	389421	Homo sapiens	CLIP-seq	starBase	None	0.5483
RAID00478049	hsa-mir-16-2	miRNA	MI0000115	Homo sapiens	PTBP1	protein	5725	Homo sapiens	CLIP-seq	starBase	None	0.5483
RAID00478577	hsa-miR-448	miRNA	MIMAT0001532	Homo sapiens	LIN28A	protein	79727	Homo sapiens	CLIP	NPInter	22959275	0.5483
RAID00480131	hsa-miR-1-3p	miRNA	MIMAT0000416	Homo sapiens	LIN28A	protein	79727	Homo sapiens	CLIP	NPInter	22959275	0.5483
RAID00483030	hsa-miR-130a-3p	miRNA	MIMAT0000425	Homo sapiens	NCBP3	protein	55421	Homo sapiens	CLIP-seq	starBase	None	0.5483
RAID00485977	hsa-miR-374a-3p	miRNA	MIMAT0004688	Homo sapiens	LIN28A	protein	79727	Homo sapiens	CLIP	NPInter	22959275	0.5483
RAID00486889	hsa-miR-197-3p	miRNA	MIMAT0000227	Homo sapiens	DGCR8	protein	54487	Homo sapiens	CLIP-seq	starBase	None	0.5483
RAID00488939	mmu-mir-16-2	miRNA	MI0000566	Mus musculus	Fus	protein	233908	Mus musculus	CLIP-seq	starBase	None	0.5483
RAID00493437	hsa-miR-221-3p	miRNA	MIMAT0000278	Homo sapiens	DGCR8	protein	54487	Homo sapiens	CLIP-seq	starBase	None	0.5483
RAID00493461	hsa-miR-361-5p	miRNA	MIMAT0000703	Homo sapiens	LIN28B	protein	389421	Homo sapiens	CLIP-seq	starBase	None	0.5483
RAID00494176	hsa-miR-23a-3p	miRNA	MIMAT0000078	Homo sapiens	LIN28B	protein	389421	Homo sapiens	CLIP-seq	starBase	None	0.5483
RAID00495324	hsa-miR-93-5p	miRNA	MIMAT0000093	Homo sapiens	LIN28B	protein	389421	Homo sapiens	CLIP-seq	starBase	None	0.5483
RAID00495886	hsa-let-7c-5p	miRNA	MIMAT0000064	Homo sapiens	LIN28A	protein	79727	Homo sapiens	IP (immunoprecipitation)//EMSA (electrophoretic mobility shift assay)//Western Blot//RT-PCR//CLIP-seq//CLIP	NPInter//starBase//RAID	20178735//22959275//26440890	0.9939
RAID00498048	hsa-miR-4257	miRNA	MIMAT0016878	Homo sapiens	EIF4A3	protein	9775	Homo sapiens	CLIP-seq	starBase	None	0.5483
RAID00498725	hsa-let-7a-1	miRNA	MI0000060	Homo sapiens	FUS	protein	2521	Homo sapiens	CLIP-seq	starBase	None	0.5483
RAID00499384	hsa-mir-4782	miRNA	MI0017427	Homo sapiens	ELAVL1	protein	1994	Homo sapiens	CLIP-seq	starBase	None	0.5483
RAID00499436	hsa-miR-30a-5p	miRNA	MIMAT0000087	Homo sapiens	EIF4A3	protein	9775	Homo sapiens	CLIP-seq	starBase	None	0.5483
RAID00499617	hsa-mir-128-2	miRNA	MI0000727	Homo sapiens	DGCR8	protein	54487	Homo sapiens	CLIP-seq	starBase	None	0.5483
RAID00500896	mmu-mir-142a	miRNA	MI0000167	Mus musculus	Fus	protein	233908	Mus musculus	CLIP-seq	starBase	None	0.5483
RAID00503273	hsa-miR-93-5p	miRNA	MIMAT0000093	Homo sapiens	ZC3H7B	protein	23264	Homo sapiens	CLIP-seq	starBase	None	0.5483
RAID00506571	hsa-mir-181a-1	miRNA	MI0000289	Homo sapiens	LIN28B	protein	389421	Homo sapiens	CLIP-seq	starBase	None	0.5483
RAID00508575	hsa-miR-3157-5p	miRNA	MIMAT0015031	Homo sapiens	DGCR8	protein	54487	Homo sapiens	CLIP-seq	starBase	None	0.5483
RAID00509690	hsa-miR-130b-3p	miRNA	MIMAT0000691	Homo sapiens	DGCR8	protein	54487	Homo sapiens	CLIP-seq	starBase	None	0.5483
RAID00510290	hsa-miR-145-5p	miRNA	MIMAT0000437	Homo sapiens	FUS	protein	2521	Homo sapiens	CLIP-seq	starBase	None	0.5483
RAID00510676	hsa-miR-330-3p	miRNA	MIMAT0000751	Homo sapiens	EIF4A3	protein	9775	Homo sapiens	CLIP-seq	starBase	None	0.5483
RAID00514525	hsa-mir-3064	miRNA	MI0017375	Homo sapiens	LIN28A	protein	79727	Homo sapiens	CLIP-seq	starBase	None	0.5483
RAID00514963	mmu-miR-5122	miRNA	MIMAT0020630	Mus musculus	Srsf1	protein	110809	Mus musculus	CLIP-seq	starBase	None	0.5483
RAID00521070	hsa-miR-186-5p	miRNA	MIMAT0000456	Homo sapiens	FUS	protein	2521	Homo sapiens	CLIP-seq	starBase	None	0.5483
RAID00523000	hsa-miR-1249-3p	miRNA	MIMAT0005901	Homo sapiens	EIF4A3	protein	9775	Homo sapiens	CLIP-seq	starBase	None	0.5483
RAID00524696	hsa-miR-1227-3p	miRNA	MIMAT0005580	Homo sapiens	ELAVL1	protein	1994	Homo sapiens	CLIP-seq	starBase	None	0.5483
RAID00525521	hsa-mir-1-2	miRNA	MI0000437	Homo sapiens	EIF4A3	protein	9775	Homo sapiens	CLIP-seq	starBase	None	0.5483
RAID00530536	hsa-miR-582-5p	miRNA	MIMAT0003247	Homo sapiens	DGCR8	protein	54487	Homo sapiens	CLIP-seq	starBase	None	0.5483
RAID00531155	hsa-miR-34a-5p	miRNA	MIMAT0000255	Homo sapiens	FMR1	protein	2332	Homo sapiens	CLIP-seq	starBase	None	0.5483
RAID00532276	hsa-mir-4712	miRNA	MI0017346	Homo sapiens	EWSR1	protein	2130	Homo sapiens	CLIP-seq	starBase	None	0.5483
RAID00534992	mmu-miR-879-5p	miRNA	MIMAT0004842	Mus musculus	Fus	protein	233908	Mus musculus	CLIP-seq	starBase	None	0.5483
RAID00535731	hsa-miR-301a-3p	miRNA	MIMAT0000688	Homo sapiens	LIN28A	protein	79727	Homo sapiens	CLIP-seq//CLIP	NPInter//starBase	22959275	0.6606
RAID00538923	hsa-mir-142	miRNA	MI0000458	Homo sapiens	FUS	protein	2521	Homo sapiens	CLIP-seq	starBase	None	0.5483
RAID00540737	hsa-miR-222-3p	miRNA	MIMAT0000279	Homo sapiens	DGCR8	protein	54487	Homo sapiens	CLIP-seq	starBase	None	0.5483
RAID00540880	hsa-let-7d	miRNA	MI0000065	Homo sapiens	LIN28A	protein	79727	Homo sapiens	Nuclear magnetic resonance//EMSA (electrophoretic mobility shift assay)	RAID	26045559	0.8808
RAID00541902	hsa-mir-548ag-2	miRNA	MI0016794	Homo sapiens	DGCR8	protein	54487	Homo sapiens	CLIP-seq	starBase	None	0.5483
RAID00545583	hsa-mir-3064	miRNA	MI0017375	Homo sapiens	FUS	protein	2521	Homo sapiens	CLIP-seq	starBase	None	0.5483
RAID00551161	hsa-mir-4687	miRNA	MI0017319	Homo sapiens	UPF1	protein	5976	Homo sapiens	CLIP-seq	starBase	None	0.5483
RAID00551562	hsa-miR-324-3p	miRNA	MIMAT0000762	Homo sapiens	LIN28A	protein	79727	Homo sapiens	CLIP	NPInter	22959275	0.5483
RAID00552406	hsa-miR-186-5p	miRNA	MIMAT0000456	Homo sapiens	LIN28B	protein	389421	Homo sapiens	CLIP-seq	starBase	None	0.5483
RAID00552582	hsa-miR-636	miRNA	MIMAT0003306	Homo sapiens	IGF2BP1	protein	10642	Homo sapiens	CLIP-seq	starBase	None	0.5483
RAID00553274	hsa-miR-3620-3p	miRNA	MIMAT0018001	Homo sapiens	IGF2BP1	protein	10642	Homo sapiens	CLIP-seq	starBase	None	0.5483
RAID00554685	hsa-miR-5094	miRNA	MIMAT0021086	Homo sapiens	DGCR8	protein	54487	Homo sapiens	CLIP-seq	starBase	None	0.5483
RAID00554730	hsa-let-7d-5p	miRNA	MIMAT0000065	Homo sapiens	FXR1	protein	8087	Homo sapiens	CLIP-seq	starBase	None	0.5483
RAID00557847	hsa-mir-30c-2	miRNA	MI0000254	Homo sapiens	DGCR8	protein	54487	Homo sapiens	CLIP-seq	starBase	None	0.5483
RAID00558416	hsa-mir-6723	miRNA	MI0022558	Homo sapiens	U2AF2	protein	11338	Homo sapiens	CLIP-seq	starBase	None	0.5483
RAID00559018	mmu-miR-665-3p	miRNA	MIMAT0003733	Mus musculus	Fus	protein	233908	Mus musculus	CLIP-seq	starBase	None	0.5483
RAID00566023	mmu-miR-296-5p	miRNA	MIMAT0000374	Mus musculus	Fus	protein	233908	Mus musculus	CLIP-seq	starBase	None	0.5483
RAID00566161	hsa-let-7i-5p	miRNA	MIMAT0000415	Homo sapiens	LIN28A	protein	79727	Homo sapiens	RIP (RNA Immunoprecipitation)//IP (immunoprecipitation)//Northern Blot//EMSA (electrophoretic mobility shift assay)//Western Blot//RT-PCR//CLIP-seq//CLIP//ChIP (chromatin immunoprecipitation assay)	NPInter//starBase//RAID	20178735//22959275//26440890//21297634	0.9993
RAID00568475	hsa-miR-30e-5p	miRNA	MIMAT0000692	Homo sapiens	LIN28B	protein	389421	Homo sapiens	CLIP-seq	starBase	None	0.5483
RAID00571357	hsa-miR-3609	miRNA	MIMAT0017986	Homo sapiens	DGCR8	protein	54487	Homo sapiens	CLIP-seq	starBase	None	0.5483
RAID00571611	mmu-miR-760-3p	miRNA	MIMAT0003898	Mus musculus	Fus	protein	233908	Mus musculus	CLIP-seq	starBase	None	0.5483
RAID00573018	hsa-miR-125a-5p	miRNA	MIMAT0000443	Homo sapiens	NTRK3	protein	4916	Homo sapiens	Western Blot//Reporter Assay//RT-PCR	RAID	17483472	0.9526
RAID00574860	hsa-miR-30d-5p	miRNA	MIMAT0000245	Homo sapiens	EIF4A3	protein	9775	Homo sapiens	CLIP-seq	starBase	None	0.5483
RAID00578283	hsa-mir-340	miRNA	MI0000802	Homo sapiens	LIN28A	protein	79727	Homo sapiens	CLIP-seq	starBase	None	0.5483
RAID00584529	mmu-miR-1929-5p	miRNA	MIMAT0009392	Mus musculus	Fus	protein	233908	Mus musculus	CLIP-seq	starBase	None	0.5483
RAID00586185	hsa-miR-4321	miRNA	MIMAT0016874	Homo sapiens	EIF4A3	protein	9775	Homo sapiens	CLIP-seq	starBase	None	0.5483
RAID00589310	hsa-mir-142	miRNA	MI0000458	Homo sapiens	FMR1	protein	2332	Homo sapiens	CLIP-seq	starBase	None	0.5483
RAID00591637	hsa-miR-3143	miRNA	MIMAT0015012	Homo sapiens	EIF4A3	protein	9775	Homo sapiens	CLIP-seq	starBase	None	0.5483
RAID00592432	hsa-mir-6723	miRNA	MI0022558	Homo sapiens	IGF2BP2	protein	10644	Homo sapiens	CLIP-seq	starBase	None	0.5483
RAID00598363	mmu-miR-323-3p	miRNA	MIMAT0000551	Mus musculus	Fus	protein	233908	Mus musculus	CLIP-seq	starBase	None	0.5483
RAID00599119	hsa-miR-34a-5p	miRNA	MIMAT0000255	Homo sapiens	DGCR8	protein	54487	Homo sapiens	CLIP-seq	starBase	None	0.5483
RAID00599663	hsa-miR-4429	miRNA	MIMAT0018944	Homo sapiens	FUS	protein	2521	Homo sapiens	CLIP-seq	starBase	None	0.5483
RAID00604601	hsa-miR-383-5p	miRNA	MIMAT0000738	Homo sapiens	FUS	protein	2521	Homo sapiens	CLIP-seq	starBase	None	0.5483
RAID00604646	hsa-let-7f-1	miRNA	MI0000067	Homo sapiens	FUS	protein	2521	Homo sapiens	CLIP-seq	starBase	None	0.5483
RAID00605070	hsa-mir-6723	miRNA	MI0022558	Homo sapiens	FUS	protein	2521	Homo sapiens	CLIP-seq	starBase	None	0.5483
RAID00608082	hsa-miR-1295a	miRNA	MIMAT0005885	Homo sapiens	DGCR8	protein	54487	Homo sapiens	CLIP-seq	starBase	None	0.5483
RAID00609901	hsa-miR-661	miRNA	MIMAT0003324	Homo sapiens	EIF4A3	protein	9775	Homo sapiens	CLIP-seq	starBase	None	0.5483
RAID00610626	hsa-miR-3200-3p	miRNA	MIMAT0015085	Homo sapiens	IGF2BP1	protein	10642	Homo sapiens	CLIP-seq	starBase	None	0.5483
RAID00611108	hsa-mir-4680	miRNA	MI0017312	Homo sapiens	FMR1	protein	2332	Homo sapiens	CLIP-seq	starBase	None	0.5483
RAID00617444	hsa-miR-21-5p	miRNA	MIMAT0000076	Homo sapiens	TIA1	protein	7072	Homo sapiens	CLIP-seq	starBase	None	0.5483
RAID00617735	hsa-miR-30e-5p	miRNA	MIMAT0000692	Homo sapiens	DGCR8	protein	54487	Homo sapiens	CLIP-seq	starBase	None	0.5483
RAID00620546	ath-MIR156a	miRNA	MI0000178	Arabidopsis thaliana	DCL1	protein	839574	Arabidopsis thaliana	RIP (RNA Immunoprecipitation)//EMSA (electrophoretic mobility shift assay)//RT-PCR	RAID	26473486	0.9526
RAID00620594	hsa-mir-199a-1	miRNA	MI0000280	Homo sapiens	ELAVL1	protein	1994	Homo sapiens	RIP (RNA Immunoprecipitation)//RT-PCR//Northern Blot	RAID	26346275	0.9526
RAID00627736	hsa-miR-296-5p	miRNA	MIMAT0000690	Homo sapiens	EIF4A3	protein	9775	Homo sapiens	CLIP-seq	starBase	None	0.5483
RAID00629271	hsa-miR-19a-3p	miRNA	MIMAT0000073	Homo sapiens	SOCS3	protein	9021	Homo sapiens	RT-PCR//Reporter Assay	NPInter	23894411	0.8808
RAID00632858	hsa-miR-29a-3p	miRNA	MIMAT0000086	Homo sapiens	EIF4A3	protein	9775	Homo sapiens	CLIP-seq	starBase	None	0.5483
RAID00632861	hsa-mir-3607	miRNA	MI0015997	Homo sapiens	DGCR8	protein	54487	Homo sapiens	CLIP-seq	starBase	None	0.5483
RAID00637773	hsa-miR-3607-3p	miRNA	MIMAT0017985	Homo sapiens	LIN28A	protein	79727	Homo sapiens	CLIP	NPInter	22959275	0.5483
RAID00641300	hsa-mir-4713	miRNA	MI0017347	Homo sapiens	DGCR8	protein	54487	Homo sapiens	CLIP-seq	starBase	None	0.5483
RAID00641486	hsa-miR-2117	miRNA	MIMAT0011162	Homo sapiens	FUS	protein	2521	Homo sapiens	CLIP-seq	starBase	None	0.5483
RAID00652659	hsa-miR-647	miRNA	MIMAT0003317	Homo sapiens	FUS	protein	2521	Homo sapiens	CLIP-seq	starBase	None	0.5483
RAID00654059	mmu-miR-301a-3p	miRNA	MIMAT0000379	Mus musculus	Fus	protein	233908	Mus musculus	CLIP-seq	starBase	None	0.5483
RAID00654533	hsa-miR-449c-5p	miRNA	MIMAT0010251	Homo sapiens	DGCR8	protein	54487	Homo sapiens	CLIP-seq	starBase	None	0.5483
RAID00654534	hsa-miR-454-3p	miRNA	MIMAT0003885	Homo sapiens	FUS	protein	2521	Homo sapiens	CLIP-seq	starBase	None	0.5483
RAID00654649	hsa-miR-107	miRNA	MIMAT0000104	Homo sapiens	FMR1	protein	2332	Homo sapiens	CLIP-seq	starBase	None	0.5483
RAID00660838	hsa-miR-1304-5p	miRNA	MIMAT0005892	Homo sapiens	EIF4A3	protein	9775	Homo sapiens	CLIP-seq	starBase	None	0.5483
RAID00665397	hsa-miR-4657	miRNA	MIMAT0019724	Homo sapiens	EIF4A3	protein	9775	Homo sapiens	CLIP-seq	starBase	None	0.5483
RAID00665765	hsa-miR-1301-3p	miRNA	MIMAT0005797	Homo sapiens	FUS	protein	2521	Homo sapiens	CLIP-seq	starBase	None	0.5483
RAID00667420	hsa-miR-4424	miRNA	MIMAT0018939	Homo sapiens	DGCR8	protein	54487	Homo sapiens	CLIP-seq	starBase	None	0.5483
RAID00668121	hsa-mir-125b-1	miRNA	MI0000446	Homo sapiens	DGCR8	protein	54487	Homo sapiens	CLIP-seq	starBase	None	0.5483
RAID00669095	hsa-miR-200c-5p	miRNA	MIMAT0004657	Homo sapiens	LIN28A	protein	79727	Homo sapiens	CLIP	NPInter	22959275	0.5483
RAID00669830	hsa-mir-7-1	miRNA	MI0000263	Homo sapiens	ELAVL1	protein	1994	Homo sapiens	Western Blot//IP (immunoprecipitation)//Pull down Assay//RT-PCR	RAID	23307866	0.982
RAID00671448	hsa-miR-614	miRNA	MIMAT0003282	Homo sapiens	EIF4A3	protein	9775	Homo sapiens	CLIP-seq	starBase	None	0.5483
RAID00671536	hsa-miR-101-5p	miRNA	MIMAT0004513	Homo sapiens	LIN28A	protein	79727	Homo sapiens	CLIP	NPInter	22959275	0.5483
RAID00673880	hsa-miR-33a-5p	miRNA	MIMAT0000091	Homo sapiens	TAF15	protein	8148	Homo sapiens	CLIP-seq	starBase	None	0.5483
RAID00673888	mmu-let-7i-5p	miRNA	MIMAT0000122	Mus musculus	Rbm3	protein	19652	Mus musculus	CLIP-seq	starBase	None	0.5483
RAID00676040	hsa-miR-374a-5p	miRNA	MIMAT0000727	Homo sapiens	LIN28A	protein	79727	Homo sapiens	CLIP-seq//CLIP	NPInter//starBase	22959275	0.6606
RAID00678227	mmu-miR-21a-5p	miRNA	MIMAT0000530	Mus musculus	Tlr7	protein	170743	Mus musculus	Immunoassay//RT-PCR	RAID	25917529	0.8808
RAID00678978	hsa-let-7g-5p	miRNA	MIMAT0000414	Homo sapiens	IGF2BP1	protein	10642	Homo sapiens	RIP (RNA Immunoprecipitation)//PAR-CLIP	RAID	23069990	0.8785
RAID00682398	hsa-miR-186-5p	miRNA	MIMAT0000456	Homo sapiens	LIN28A	protein	79727	Homo sapiens	CLIP-seq//CLIP	NPInter//starBase	22959275	0.6606
RAID00685048	mmu-miR-485-5p	miRNA	MIMAT0003128	Mus musculus	Fus	protein	233908	Mus musculus	CLIP-seq	starBase	None	0.5483
RAID00685276	hsa-miR-3664-5p	miRNA	MIMAT0018086	Homo sapiens	TNRC6A	protein	27327	Homo sapiens	CLIP-seq	starBase	None	0.5483
RAID00685720	hsa-let-7b-5p	miRNA	MIMAT0000063	Homo sapiens	FXR1	protein	8087	Homo sapiens	CLIP-seq	starBase	None	0.5483
RAID00687789	hsa-miR-3944-3p	miRNA	MIMAT0018360	Homo sapiens	U2AF2	protein	11338	Homo sapiens	CLIP-seq	starBase	None	0.5483
RAID00690846	hsa-miR-93-5p	miRNA	MIMAT0000093	Homo sapiens	LIN28A	protein	79727	Homo sapiens	CLIP-seq//CLIP	NPInter//starBase	22959275	0.6606
RAID00691088	hsa-miR-23b-3p	miRNA	MIMAT0000418	Homo sapiens	FXR1	protein	8087	Homo sapiens	CLIP-seq	starBase	None	0.5483
RAID00691717	hsa-miR-4647	miRNA	MIMAT0019709	Homo sapiens	FUS	protein	2521	Homo sapiens	CLIP-seq	starBase	None	0.5483
RAID00693003	hsa-mir-103a-1	miRNA	MI0000109	Homo sapiens	FMR1	protein	2332	Homo sapiens	CLIP-seq	starBase	None	0.5483
RAID00696037	hsa-mir-4667	miRNA	MI0017297	Homo sapiens	EIF4A3	protein	9775	Homo sapiens	CLIP-seq	starBase	None	0.5483
RAID00696923	hsa-miR-34a-5p	miRNA	MIMAT0000255	Homo sapiens	LIN28B	protein	389421	Homo sapiens	CLIP-seq	starBase	None	0.5483
RAID00700184	mmu-let-7d-5p	miRNA	MIMAT0000383	Mus musculus	Srsf2	protein	20382	Mus musculus	CLIP-seq	starBase	None	0.5483
RAID00700752	hsa-miR-569	miRNA	MIMAT0003234	Homo sapiens	EIF4A3	protein	9775	Homo sapiens	CLIP-seq	starBase	None	0.5483
RAID00703561	hsa-miR-126-3p	miRNA	MIMAT0000445	Homo sapiens	FXR1	protein	8087	Homo sapiens	CLIP-seq	starBase	None	0.5483
RAID00704014	hsa-mir-493	miRNA	MI0003132	Homo sapiens	FUS	protein	2521	Homo sapiens	CLIP-seq	starBase	None	0.5483
RAID00704164	hsa-miR-363-3p	miRNA	MIMAT0000707	Homo sapiens	LIN28A	protein	79727	Homo sapiens	CLIP-seq	starBase	None	0.5483
RAID00706167	hsa-miR-449a	miRNA	MIMAT0001541	Homo sapiens	DGCR8	protein	54487	Homo sapiens	CLIP-seq	starBase	None	0.5483
RAID00707273	mmu-mir-30c-2	miRNA	MI0000548	Mus musculus	Srsf1	protein	110809	Mus musculus	CLIP-seq	starBase	None	0.5483
RAID00708243	hsa-miR-3615	miRNA	MIMAT0017994	Homo sapiens	EIF4A3	protein	9775	Homo sapiens	CLIP-seq	starBase	None	0.5483
RAID00709216	hsa-mir-103a-2	miRNA	MI0000108	Homo sapiens	DGCR8	protein	54487	Homo sapiens	CLIP-seq	starBase	None	0.5483
RAID00712332	hsa-let-7g-5p	miRNA	MIMAT0000414	Homo sapiens	PTBP1	protein	5725	Homo sapiens	CLIP-seq	starBase	None	0.5483
RAID00713839	hsa-miR-1305	miRNA	MIMAT0005893	Homo sapiens	DGCR8	protein	54487	Homo sapiens	CLIP-seq	starBase	None	0.5483
RAID00715260	hsa-mir-1-2	miRNA	MI0000437	Homo sapiens	FMR1	protein	2332	Homo sapiens	CLIP-seq	starBase	None	0.5483
RAID00716937	hsa-mir-425	miRNA	MI0001448	Homo sapiens	FUS	protein	2521	Homo sapiens	CLIP-seq	starBase	None	0.5483
RAID00718154	hsa-miR-5090	miRNA	MIMAT0021082	Homo sapiens	EIF4A3	protein	9775	Homo sapiens	CLIP-seq	starBase	None	0.5483
RAID00718249	hsa-mir-4746	miRNA	MI0017385	Homo sapiens	DGCR8	protein	54487	Homo sapiens	CLIP-seq	starBase	None	0.5483
RAID00718317	ath-MIR156a	miRNA	MI0000178	Arabidopsis thaliana	CDF2	protein	833962	Arabidopsis thaliana	RIP (RNA Immunoprecipitation)//RT-PCR//EMSA (electrophoretic mobility shift assay)//Northern Blot	RAID	26473486	0.982
RAID00720725	hsa-mir-3198-2	miRNA	MI0017335	Homo sapiens	EIF4A3	protein	9775	Homo sapiens	CLIP-seq	starBase	None	0.5483
RAID00726475	hsa-mir-378a	miRNA	MI0000786	Homo sapiens	PTBP1	protein	5725	Homo sapiens	CLIP-seq	starBase	None	0.5483
RAID00727824	hsa-miR-182-5p	miRNA	MIMAT0000259	Homo sapiens	PTBP1	protein	5725	Homo sapiens	CLIP-seq	starBase	None	0.5483
RAID00728941	hsa-mir-4720	miRNA	MI0017355	Homo sapiens	U2AF2	protein	11338	Homo sapiens	CLIP-seq	starBase	None	0.5483
RAID00729027	hsa-miR-29c-3p	miRNA	MIMAT0000681	Homo sapiens	DGCR8	protein	54487	Homo sapiens	CLIP-seq	starBase	None	0.5483
RAID00734524	hsa-let-7b-5p	miRNA	MIMAT0000063	Homo sapiens	AGO2	protein	27161	Homo sapiens	RIP (RNA Immunoprecipitation)//RT-PCR//Northern Blot//Western Blot	RAID	26253535	0.982
RAID00735076	hsa-miR-3200-3p	miRNA	MIMAT0015085	Homo sapiens	FUS	protein	2521	Homo sapiens	CLIP-seq	starBase	None	0.5483
RAID00735779	hsa-miR-3917	miRNA	MIMAT0018191	Homo sapiens	FMR1	protein	2332	Homo sapiens	CLIP-seq	starBase	None	0.5483
RAID00736828	hsa-miR-4534	miRNA	MIMAT0019073	Homo sapiens	FUS	protein	2521	Homo sapiens	CLIP-seq	starBase	None	0.5483
RAID00737869	hsa-miR-331-3p	miRNA	MIMAT0000760	Homo sapiens	DGCR8	protein	54487	Homo sapiens	CLIP-seq	starBase	None	0.5483
RAID00742080	hsa-let-7a-3	miRNA	MI0000062	Homo sapiens	FUS	protein	2521	Homo sapiens	CLIP-seq	starBase	None	0.5483
RAID00742630	hsa-mir-4664	miRNA	MI0017294	Homo sapiens	EIF4A3	protein	9775	Homo sapiens	CLIP-seq	starBase	None	0.5483
RAID00744682	hsa-mir-19b-1	miRNA	MI0000074	Homo sapiens	LIN28A	protein	79727	Homo sapiens	CLIP-seq	starBase	None	0.5483
RAID00745692	hsa-miR-30a-5p	miRNA	MIMAT0000087	Homo sapiens	DGCR8	protein	54487	Homo sapiens	CLIP-seq	starBase	None	0.5483
RAID00747125	hsa-miR-127-3p	miRNA	MIMAT0000446	Homo sapiens	MMP13	protein	4322	Homo sapiens	Reporter Assay//RT-PCR//Western Blot	RAID	23762330	0.9526
RAID00748932	hsa-mir-9-2	miRNA	MI0000467	Homo sapiens	FUS	protein	2521	Homo sapiens	CLIP-seq	starBase	None	0.5483
RAID00749220	hsa-miR-182-5p	miRNA	MIMAT0000259	Homo sapiens	FMR1	protein	2332	Homo sapiens	CLIP-seq	starBase	None	0.5483
RAID00750579	hsa-miR-578	miRNA	MIMAT0003243	Homo sapiens	FUS	protein	2521	Homo sapiens	CLIP-seq	starBase	None	0.5483
RAID00751701	hsa-miR-146b-5p	miRNA	MIMAT0002809	Homo sapiens	LIN28A	protein	79727	Homo sapiens	CLIP-seq	starBase	None	0.5483
RAID00753944	hsa-miR-374a-5p	miRNA	MIMAT0000727	Homo sapiens	FUS	protein	2521	Homo sapiens	CLIP-seq	starBase	None	0.5483
RAID00754279	hsa-miR-185-5p	miRNA	MIMAT0000455	Homo sapiens	EIF4A3	protein	9775	Homo sapiens	CLIP-seq	starBase	None	0.5483
RAID00754904	hsa-miR-1247-5p	miRNA	MIMAT0005899	Homo sapiens	LIN28A	protein	79727	Homo sapiens	CLIP	NPInter	22959275	0.5483
RAID00757415	hsa-miR-24-3p	miRNA	MIMAT0000080	Homo sapiens	H2AFX	protein	3014	Homo sapiens	RT-PCR	RAID	25319395	0.7311
RAID00759030	hsa-mir-4709	miRNA	MI0017342	Homo sapiens	PTBP1	protein	5725	Homo sapiens	CLIP-seq	starBase	None	0.5483
RAID00759686	hsa-miR-3940-3p	miRNA	MIMAT0018356	Homo sapiens	U2AF2	protein	11338	Homo sapiens	CLIP-seq	starBase	None	0.5483
RAID00766879	mmu-mir-125b-2	miRNA	MI0000152	Mus musculus	Fus	protein	233908	Mus musculus	CLIP-seq	starBase	None	0.5483
RAID00767069	hsa-miR-203a-3p	miRNA	MIMAT0000264	Homo sapiens	EIF4A3	protein	9775	Homo sapiens	CLIP-seq	starBase	None	0.5483
RAID00767319	hsa-mir-6723	miRNA	MI0022558	Homo sapiens	ELAVL1	protein	1994	Homo sapiens	CLIP-seq	starBase	None	0.5483
RAID00767388	hsa-miR-615-3p	miRNA	MIMAT0003283	Homo sapiens	DGCR8	protein	54487	Homo sapiens	CLIP-seq	starBase	None	0.5483
RAID00770317	hsa-miR-642a-5p	miRNA	MIMAT0003312	Homo sapiens	DGCR8	protein	54487	Homo sapiens	CLIP-seq	starBase	None	0.5483
RAID00770451	hsa-miR-301a-5p	miRNA	MIMAT0022696	Homo sapiens	LIN28A	protein	79727	Homo sapiens	CLIP	NPInter	22959275	0.5483
RAID00770762	hsa-miR-26b-5p	miRNA	MIMAT0000083	Homo sapiens	LIN28B	protein	389421	Homo sapiens	CLIP-seq	starBase	None	0.5483
RAID00774977	ath-MIR172e	miRNA	MI0001089	Arabidopsis thaliana	FCA	protein	827323	Arabidopsis thaliana	RIP (RNA Immunoprecipitation)//EMSA (electrophoretic mobility shift assay)//RT-PCR//Pull down Assay	RAID	22431732	0.982
RAID00775279	hsa-miR-1249-3p	miRNA	MIMAT0005901	Homo sapiens	DGCR8	protein	54487	Homo sapiens	CLIP-seq	starBase	None	0.5483
RAID00775455	hsa-miR-4641	miRNA	MIMAT0019701	Homo sapiens	UPF1	protein	5976	Homo sapiens	CLIP-seq	starBase	None	0.5483
RAID00776132	hsa-mir-6723	miRNA	MI0022558	Homo sapiens	HNRNPC	protein	3183	Homo sapiens	CLIP-seq	starBase	None	0.5483
RAID00778032	hsa-miR-182-5p	miRNA	MIMAT0000259	Homo sapiens	ALKBH5	protein	54890	Homo sapiens	CLIP-seq	starBase	None	0.5483
RAID00780176	hsa-miR-130a-3p	miRNA	MIMAT0000425	Homo sapiens	FMR1	protein	2332	Homo sapiens	CLIP-seq	starBase	None	0.5483
RAID00781003	hsa-mir-24-2	miRNA	MI0000081	Homo sapiens	EIF4A3	protein	9775	Homo sapiens	CLIP-seq	starBase	None	0.5483
RAID00781398	hsa-mir-4700	miRNA	MI0017333	Homo sapiens	IGF2BP2	protein	10644	Homo sapiens	CLIP-seq	starBase	None	0.5483
RAID00781445	hsa-miR-423-3p	miRNA	MIMAT0001340	Homo sapiens	U2AF2	protein	11338	Homo sapiens	CLIP-seq	starBase	None	0.5483
RAID00781508	hsa-miR-4427	miRNA	MIMAT0018942	Homo sapiens	EIF4A3	protein	9775	Homo sapiens	CLIP-seq	starBase	None	0.5483
RAID00781597	hsa-miR-330-3p	miRNA	MIMAT0000751	Homo sapiens	DGCR8	protein	54487	Homo sapiens	CLIP-seq	starBase	None	0.5483
RAID00782512	hsa-let-7e-5p	miRNA	MIMAT0000066	Homo sapiens	FMR1	protein	2332	Homo sapiens	CLIP-seq	starBase	None	0.5483
RAID00784659	hsa-miR-497-5p	miRNA	MIMAT0002820	Homo sapiens	DGCR8	protein	54487	Homo sapiens	CLIP-seq	starBase	None	0.5483
RAID00791462	mmu-miR-210-3p	miRNA	MIMAT0000658	Mus musculus	Fus	protein	233908	Mus musculus	CLIP-seq	starBase	None	0.5483
RAID00794940	hsa-mir-1-2	miRNA	MI0000437	Homo sapiens	DGCR8	protein	54487	Homo sapiens	CLIP-seq	starBase	None	0.5483
RAID00795590	mmu-mir-291a	miRNA	MI0000389	Mus musculus	Ezh2	protein	14056	Mus musculus	CLIP-seq	starBase	None	0.5483
RAID00797618	hsa-mir-4646	miRNA	MI0017273	Homo sapiens	FUS	protein	2521	Homo sapiens	CLIP-seq	starBase	None	0.5483
RAID00797988	hsa-miR-346	miRNA	MIMAT0000773	Homo sapiens	DGCR8	protein	54487	Homo sapiens	CLIP-seq	starBase	None	0.5483
RAID00798187	hsa-miR-23b-3p	miRNA	MIMAT0000418	Homo sapiens	LIN28B	protein	389421	Homo sapiens	CLIP-seq	starBase	None	0.5483
RAID00799507	hsa-miR-1909-3p	miRNA	MIMAT0007883	Homo sapiens	FMR1	protein	2332	Homo sapiens	CLIP-seq	starBase	None	0.5483
RAID00803530	hsa-miR-130a-3p	miRNA	MIMAT0000425	Homo sapiens	FUS	protein	2521	Homo sapiens	CLIP-seq	starBase	None	0.5483
RAID00806787	hsa-miR-27a-3p	miRNA	MIMAT0000084	Homo sapiens	AGO1	protein	26523	Homo sapiens	Northern Blot//IP (immunoprecipitation)	RAID	22844086	0.8808
RAID00807211	mmu-miR-3068-5p	miRNA	MIMAT0014842	Mus musculus	Fus	protein	233908	Mus musculus	CLIP-seq	starBase	None	0.5483
RAID00809525	mmu-let-7i-5p	miRNA	MIMAT0000122	Mus musculus	Fus	protein	233908	Mus musculus	CLIP-seq	starBase	None	0.5483
RAID00812950	hsa-miR-4751	miRNA	MIMAT0019888	Homo sapiens	FUS	protein	2521	Homo sapiens	CLIP-seq	starBase	None	0.5483
RAID00813151	hsa-miR-454-3p	miRNA	MIMAT0003885	Homo sapiens	PTBP1	protein	5725	Homo sapiens	CLIP-seq	starBase	None	0.5483
RAID00813231	hsa-miR-30e-5p	miRNA	MIMAT0000692	Homo sapiens	FXR1	protein	8087	Homo sapiens	CLIP-seq	starBase	None	0.5483
RAID00814002	hsa-miR-184	miRNA	MIMAT0000454	Homo sapiens	DGCR8	protein	54487	Homo sapiens	CLIP-seq	starBase	None	0.5483
RAID00814200	hsa-miR-6080	miRNA	MIMAT0023705	Homo sapiens	PTBP1	protein	5725	Homo sapiens	CLIP-seq	starBase	None	0.5483
RAID00818866	hsa-miR-186-5p	miRNA	MIMAT0000456	Homo sapiens	PTBP1	protein	5725	Homo sapiens	CLIP-seq	starBase	None	0.5483
RAID00819862	hsa-miR-125a-5p	miRNA	MIMAT0000443	Homo sapiens	LIN28B	protein	389421	Homo sapiens	CLIP-seq	starBase	None	0.5483
RAID00824947	hsa-miR-20a-5p	miRNA	MIMAT0000075	Homo sapiens	FUS	protein	2521	Homo sapiens	CLIP-seq	starBase	None	0.5483
RAID00826837	hsa-miR-19a-5p	miRNA	MIMAT0004490	Homo sapiens	LIN28A	protein	79727	Homo sapiens	CLIP	NPInter	22959275	0.5483
RAID00827784	hsa-miR-503-5p	miRNA	MIMAT0002874	Homo sapiens	FXR1	protein	8087	Homo sapiens	CLIP-seq	starBase	None	0.5483
RAID00828086	hsa-miR-2276-3p	miRNA	MIMAT0011775	Homo sapiens	DGCR8	protein	54487	Homo sapiens	CLIP-seq	starBase	None	0.5483
RAID00828122	cel-lin-4-5p	miRNA	MIMAT0000002	Caenorhabditis elegans	flh-2	protein	175670	Caenorhabditis elegans	Yeast two-hybrid analysis	NPInter	18794349	0.7311
RAID00829139	hsa-miR-125a-5p	miRNA	MIMAT0000443	Homo sapiens	FMR1	protein	2332	Homo sapiens	CLIP-seq	starBase	None	0.5483
RAID00831924	hsa-miR-4779	miRNA	MIMAT0019938	Homo sapiens	EIF4A3	protein	9775	Homo sapiens	CLIP-seq	starBase	None	0.5483
RAID00835265	hsa-mir-34b	miRNA	MI0000742	Homo sapiens	CDK6	protein	1021	Homo sapiens	Western Blot//Reporter Assay	RAID	18768788	0.8808
RAID00836151	hsa-miR-449a	miRNA	MIMAT0001541	Homo sapiens	LIN28B	protein	389421	Homo sapiens	CLIP-seq	starBase	None	0.5483
RAID00836471	hsa-miR-4426	miRNA	MIMAT0018941	Homo sapiens	MOV10	protein	4343	Homo sapiens	CLIP-seq	starBase	None	0.5483
RAID00836866	mmu-mir-30c-2	miRNA	MI0000548	Mus musculus	Srsf2	protein	20382	Mus musculus	CLIP-seq	starBase	None	0.5483
RAID00845405	hsa-miR-20a-5p	miRNA	MIMAT0000075	Homo sapiens	FMR1	protein	2332	Homo sapiens	CLIP-seq	starBase	None	0.5483
RAID00845661	hsa-miR-30d-5p	miRNA	MIMAT0000245	Homo sapiens	DGCR8	protein	54487	Homo sapiens	CLIP-seq	starBase	None	0.5483
RAID00846565	mmu-miR-375-3p	miRNA	MIMAT0000739	Mus musculus	Il10	protein	16153	Mus musculus	RT-PCR	RAID	26235810	0.7311
RAID00849704	hsa-miR-206	miRNA	MIMAT0000462	Homo sapiens	FMR1	protein	2332	Homo sapiens	CLIP-seq	starBase	None	0.5483
RAID00852543	hsa-let-7a-1	miRNA	MI0000060	Homo sapiens	U2AF2	protein	11338	Homo sapiens	CLIP-seq	starBase	None	0.5483
RAID00852661	hsa-miR-147a	miRNA	MIMAT0000251	Homo sapiens	EIF4A3	protein	9775	Homo sapiens	CLIP-seq	starBase	None	0.5483
RAID00853463	hsa-miR-186-5p	miRNA	MIMAT0000456	Homo sapiens	EIF4A3	protein	9775	Homo sapiens	CLIP-seq	starBase	None	0.5483
RAID00855867	xtr-let-7c	miRNA	MI0004886	Xenopus (Silurana) tropicalis	lin28a	protein	548523	Xenopus (Silurana) tropicalis	EMSA (electrophoretic mobility shift assay)	RAID	22570413	0.7311
RAID00858909	hsa-mir-4732	miRNA	MI0017369	Homo sapiens	FUS	protein	2521	Homo sapiens	CLIP-seq	starBase	None	0.5483
RAID00859410	hsa-miR-658	miRNA	MIMAT0003336	Homo sapiens	FMR1	protein	2332	Homo sapiens	CLIP-seq	starBase	None	0.5483
RAID00861097	hsa-miR-29a-3p	miRNA	MIMAT0000086	Homo sapiens	CDK6	protein	1021	Homo sapiens	Reporter Assay//RT-PCR//Western Blot	RAID	20086245	0.9526
RAID00861613	hsa-mir-4782	miRNA	MI0017427	Homo sapiens	EIF4A3	protein	9775	Homo sapiens	CLIP-seq	starBase	None	0.5483
RAID00862395	hsa-mir-30c-2	miRNA	MI0000254	Homo sapiens	FUS	protein	2521	Homo sapiens	CLIP-seq	starBase	None	0.5483
RAID00862642	hsa-miR-223-3p	miRNA	MIMAT0000280	Homo sapiens	LIN28A	protein	79727	Homo sapiens	CLIP-seq	starBase	None	0.5483
RAID00862788	hsa-miR-3618	miRNA	MIMAT0017998	Homo sapiens	FMR1	protein	2332	Homo sapiens	CLIP-seq	starBase	None	0.5483
RAID00868918	hsa-miR-3938	miRNA	MIMAT0018353	Homo sapiens	DGCR8	protein	54487	Homo sapiens	CLIP-seq	starBase	None	0.5483
RAID00870485	hsa-miR-423-3p	miRNA	MIMAT0001340	Homo sapiens	LIN28A	protein	79727	Homo sapiens	CLIP-seq	starBase	None	0.5483
RAID00872182	hsa-mir-103a-2	miRNA	MI0000108	Homo sapiens	FUS	protein	2521	Homo sapiens	CLIP-seq	starBase	None	0.5483
RAID00872930	hsa-miR-296-5p	miRNA	MIMAT0000690	Homo sapiens	DGCR8	protein	54487	Homo sapiens	CLIP-seq	starBase	None	0.5483
RAID00875696	hsa-mir-5004	miRNA	MI0017870	Homo sapiens	U2AF2	protein	11338	Homo sapiens	CLIP-seq	starBase	None	0.5483
RAID00876158	mmu-mir-669p-2	miRNA	MI0014071	Mus musculus	Fus	protein	233908	Mus musculus	CLIP-seq	starBase	None	0.5483
RAID00879334	hsa-miR-3184-5p	miRNA	MIMAT0015064	Homo sapiens	EIF4A3	protein	9775	Homo sapiens	CLIP-seq	starBase	None	0.5483
RAID00879990	hsa-miR-23a-3p	miRNA	MIMAT0000078	Homo sapiens	PTBP1	protein	5725	Homo sapiens	CLIP-seq	starBase	None	0.5483
RAID00884018	hsa-let-7a-5p	miRNA	MIMAT0000062	Homo sapiens	AGO2	protein	27161	Homo sapiens	Northern Blot//IP (immunoprecipitation)	RAID	22844086	0.8808
RAID00886646	hsa-miR-338-3p	miRNA	MIMAT0000763	Homo sapiens	EIF4A3	protein	9775	Homo sapiens	CLIP-seq	starBase	None	0.5483
RAID00887381	hsa-miR-200b-3p	miRNA	MIMAT0000318	Homo sapiens	EIF4A3	protein	9775	Homo sapiens	CLIP-seq	starBase	None	0.5483
RAID00888086	hsa-miR-100-5p	miRNA	MIMAT0000098	Homo sapiens	EIF4A3	protein	9775	Homo sapiens	CLIP-seq	starBase	None	0.5483
RAID00889246	hsa-miR-601	miRNA	MIMAT0003269	Homo sapiens	UPF1	protein	5976	Homo sapiens	CLIP-seq	starBase	None	0.5483
RAID00890094	mmu-miR-23b-3p	miRNA	MIMAT0000125	Mus musculus	Fus	protein	233908	Mus musculus	CLIP-seq	starBase	None	0.5483
RAID00890153	mmu-mir-199a-2	miRNA	MI0000713	Mus musculus	Fus	protein	233908	Mus musculus	CLIP-seq	starBase	None	0.5483
RAID00892555	hsa-let-7e-5p	miRNA	MIMAT0000066	Homo sapiens	LIN28A	protein	79727	Homo sapiens	IP (immunoprecipitation)//EMSA (electrophoretic mobility shift assay)//RT-PCR//Western Blot//CLIP	NPInter//RAID	18951094//20178735//22959275//26440890	0.9919
RAID00894768	cel-let-7-5p	miRNA	MIMAT0000001	Caenorhabditis elegans	dcr-1	protein	176138	Caenorhabditis elegans	RNA interference	NPInter	11461699	0.7311
RAID00895369	hsa-miR-657	miRNA	MIMAT0003335	Homo sapiens	EIF4A3	protein	9775	Homo sapiens	CLIP-seq	starBase	None	0.5483
RAID00895973	hsa-miR-143-3p	miRNA	MIMAT0000435	Homo sapiens	LIN28A	protein	79727	Homo sapiens	CLIP-seq	starBase	None	0.5483
RAID00898528	hsa-mir-4638	miRNA	MI0017265	Homo sapiens	EIF4A3	protein	9775	Homo sapiens	CLIP-seq	starBase	None	0.5483
RAID00900541	hsa-miR-6080	miRNA	MIMAT0023705	Homo sapiens	U2AF2	protein	11338	Homo sapiens	CLIP-seq	starBase	None	0.5483
RAID00903409	hsa-miR-3188	miRNA	MIMAT0015070	Homo sapiens	FUS	protein	2521	Homo sapiens	CLIP-seq	starBase	None	0.5483
RAID00906794	hsa-mir-181b-2	miRNA	MI0000683	Homo sapiens	FUS	protein	2521	Homo sapiens	CLIP-seq	starBase	None	0.5483
RAID00907996	hsa-miR-761	miRNA	MIMAT0010364	Homo sapiens	ELAVL1	protein	1994	Homo sapiens	CLIP-seq	starBase	None	0.5483
RAID00910987	hsa-miR-1287-5p	miRNA	MIMAT0005878	Homo sapiens	EIF4A3	protein	9775	Homo sapiens	CLIP-seq	starBase	None	0.5483
RAID00912283	hsa-mir-153-2	miRNA	MI0000464	Homo sapiens	FUS	protein	2521	Homo sapiens	CLIP-seq	starBase	None	0.5483
RAID00913434	hsa-miR-1181	miRNA	MIMAT0005826	Homo sapiens	ELAVL1	protein	1994	Homo sapiens	CLIP-seq	starBase	None	0.5483
RAID00913840	mmu-mir-669a-6	miRNA	MI0014058	Mus musculus	Fus	protein	233908	Mus musculus	CLIP-seq	starBase	None	0.5483
RAID00914358	hsa-miR-29a-3p	miRNA	MIMAT0000086	Homo sapiens	DGCR8	protein	54487	Homo sapiens	CLIP-seq	starBase	None	0.5483
RAID00914822	mmu-mir-181a-2	miRNA	MI0000223	Mus musculus	Fus	protein	233908	Mus musculus	CLIP-seq	starBase	None	0.5483
RAID00919702	hsa-miR-3124-5p	miRNA	MIMAT0014986	Homo sapiens	EIF4A3	protein	9775	Homo sapiens	CLIP-seq	starBase	None	0.5483
RAID00919994	mmu-miR-188-5p	miRNA	MIMAT0000217	Mus musculus	Fus	protein	233908	Mus musculus	CLIP-seq	starBase	None	0.5483
RAID00921429	hsa-mir-4691	miRNA	MI0017324	Homo sapiens	EIF4A3	protein	9775	Homo sapiens	CLIP-seq	starBase	None	0.5483
RAID00921699	hsa-miR-4517	miRNA	MIMAT0019054	Homo sapiens	EIF4A3	protein	9775	Homo sapiens	CLIP-seq	starBase	None	0.5483
RAID00922208	hsa-miR-1304-5p	miRNA	MIMAT0005892	Homo sapiens	DGCR8	protein	54487	Homo sapiens	CLIP-seq	starBase	None	0.5483
RAID00924505	hsa-miR-185-5p	miRNA	MIMAT0000455	Homo sapiens	PTBP1	protein	5725	Homo sapiens	CLIP-seq	starBase	None	0.5483
RAID00924633	hsa-miR-1306-3p	miRNA	MIMAT0005950	Homo sapiens	IGF2BP1	protein	10642	Homo sapiens	CLIP-seq	starBase	None	0.5483
RAID00926038	hsa-mir-34b	miRNA	MI0000742	Homo sapiens	HSPA5	protein	3309	Homo sapiens	RT-PCR	NPInter	23305226	0.7311
RAID00926382	hsa-mir-19b-1	miRNA	MI0000074	Homo sapiens	FUS	protein	2521	Homo sapiens	CLIP-seq	starBase	None	0.5483
RAID00928135	hsa-miR-3176	miRNA	MIMAT0015053	Homo sapiens	IGF2BP2	protein	10644	Homo sapiens	CLIP-seq	starBase	None	0.5483
RAID00928940	hsa-miR-4467	miRNA	MIMAT0018994	Homo sapiens	DGCR8	protein	54487	Homo sapiens	CLIP-seq	starBase	None	0.5483
RAID00929562	hsa-mir-16-1	miRNA	MI0000070	Homo sapiens	TIA1	protein	7072	Homo sapiens	CLIP-seq	starBase	None	0.5483
RAID00931212	hsa-miR-217	miRNA	MIMAT0000274	Homo sapiens	DGCR8	protein	54487	Homo sapiens	CLIP-seq	starBase	None	0.5483
RAID00933791	hsa-mir-4720	miRNA	MI0017355	Homo sapiens	HNRNPC	protein	3183	Homo sapiens	CLIP-seq	starBase	None	0.5483
RAID00935627	hsa-miR-1298-5p	miRNA	MIMAT0005800	Homo sapiens	FUS	protein	2521	Homo sapiens	CLIP-seq	starBase	None	0.5483
RAID00937835	hsa-miR-4751	miRNA	MIMAT0019888	Homo sapiens	IGF2BP3	protein	10643	Homo sapiens	CLIP-seq	starBase	None	0.5483
RAID00938647	hsa-miR-33a-5p	miRNA	MIMAT0000091	Homo sapiens	EIF4A3	protein	9775	Homo sapiens	CLIP-seq	starBase	None	0.5483
RAID00941194	hsa-miR-939-5p	miRNA	MIMAT0004982	Homo sapiens	FMR1	protein	2332	Homo sapiens	CLIP-seq	starBase	None	0.5483
RAID00941693	hsa-mir-4700	miRNA	MI0017333	Homo sapiens	FMR1	protein	2332	Homo sapiens	CLIP-seq	starBase	None	0.5483
RAID00941759	hsa-miR-4473	miRNA	MIMAT0019000	Homo sapiens	TNRC6A	protein	27327	Homo sapiens	CLIP-seq	starBase	None	0.5483
RAID00944187	hsa-let-7c-5p	miRNA	MIMAT0000064	Homo sapiens	FMR1	protein	2332	Homo sapiens	CLIP-seq	starBase	None	0.5483
RAID00946330	mmu-miR-383-5p	miRNA	MIMAT0000748	Mus musculus	Fus	protein	233908	Mus musculus	CLIP-seq	starBase	None	0.5483
RAID00946366	hsa-mir-5009	miRNA	MI0017877	Homo sapiens	DGCR8	protein	54487	Homo sapiens	CLIP-seq	starBase	None	0.5483
RAID00948434	hsa-miR-940	miRNA	MIMAT0004983	Homo sapiens	FUS	protein	2521	Homo sapiens	CLIP-seq	starBase	None	0.5483
RAID00953211	hsa-miR-451a	miRNA	MIMAT0001631	Homo sapiens	FUS	protein	2521	Homo sapiens	CLIP-seq	starBase	None	0.5483
RAID00957415	hsa-mir-92a-1	miRNA	MI0000093	Homo sapiens	FUS	protein	2521	Homo sapiens	CLIP-seq	starBase	None	0.5483
RAID00957945	hsa-miR-25-3p	miRNA	MIMAT0000081	Homo sapiens	LIN28A	protein	79727	Homo sapiens	CLIP-seq//CLIP	NPInter//starBase	22959275	0.6606
RAID00960221	hsa-miR-148b-3p	miRNA	MIMAT0000759	Homo sapiens	FXR1	protein	8087	Homo sapiens	CLIP-seq	starBase	None	0.5483
RAID00964661	mmu-miR-298-5p	miRNA	MIMAT0000376	Mus musculus	Fus	protein	233908	Mus musculus	CLIP-seq	starBase	None	0.5483
RAID00965033	hsa-miR-181c-5p	miRNA	MIMAT0000258	Homo sapiens	FUS	protein	2521	Homo sapiens	CLIP-seq	starBase	None	0.5483
RAID00965682	hsa-miR-3615	miRNA	MIMAT0017994	Homo sapiens	DGCR8	protein	54487	Homo sapiens	CLIP-seq	starBase	None	0.5483
RAID00967480	hsa-miR-492	miRNA	MIMAT0002812	Homo sapiens	FMR1	protein	2332	Homo sapiens	CLIP-seq	starBase	None	0.5483
RAID00972137	hsa-miR-21-5p	miRNA	MIMAT0000076	Homo sapiens	CAPRIN1	protein	4076	Homo sapiens	CLIP-seq	starBase	None	0.5483
RAID00973356	mmu-let-7f-1	miRNA	MI0000562	Mus musculus	Lin28a	protein	83557	Mus musculus	Western Blot//EMSA (electrophoretic mobility shift assay)//RT-PCR//Nuclear magnetic resonance	RAID	22078496	0.982
RAID00974392	hsa-mir-4732	miRNA	MI0017369	Homo sapiens	ALKBH5	protein	54890	Homo sapiens	CLIP-seq	starBase	None	0.5483
RAID00976850	hsa-miR-212-3p	miRNA	MIMAT0000269	Homo sapiens	PTBP1	protein	5725	Homo sapiens	CLIP-seq	starBase	None	0.5483
RAID00978540	hsa-mir-181a-2	miRNA	MI0000269	Homo sapiens	EIF4A3	protein	9775	Homo sapiens	CLIP-seq	starBase	None	0.5483
RAID00980657	hsa-miR-3940-3p	miRNA	MIMAT0018356	Homo sapiens	ELAVL1	protein	1994	Homo sapiens	CLIP-seq	starBase	None	0.5483
RAID00987195	hsa-miR-6080	miRNA	MIMAT0023705	Homo sapiens	LIN28A	protein	79727	Homo sapiens	CLIP-seq	starBase	None	0.5483
RAID00988250	hsa-miR-185-5p	miRNA	MIMAT0000455	Homo sapiens	DGCR8	protein	54487	Homo sapiens	CLIP-seq	starBase	None	0.5483
RAID00990391	hsa-miR-671-5p	miRNA	MIMAT0003880	Homo sapiens	FUS	protein	2521	Homo sapiens	CLIP-seq	starBase	None	0.5483
RAID00991284	hsa-miR-671-5p	miRNA	MIMAT0003880	Homo sapiens	LIN28A	protein	79727	Homo sapiens	CLIP-seq//CLIP	NPInter//starBase	22959275	0.6606
RAID00992410	hsa-miR-4636	miRNA	MIMAT0019693	Homo sapiens	TNRC6A	protein	27327	Homo sapiens	CLIP-seq	starBase	None	0.5483
RAID00992826	hsa-mir-4768	miRNA	MI0017409	Homo sapiens	EIF4A3	protein	9775	Homo sapiens	CLIP-seq	starBase	None	0.5483
RAID00994170	hsa-mir-16-1	miRNA	MI0000070	Homo sapiens	PTBP1	protein	5725	Homo sapiens	CLIP-seq	starBase	None	0.5483
RAID00994218	hsa-mir-1207	miRNA	MI0006340	Homo sapiens	EIF4A3	protein	9775	Homo sapiens	CLIP-seq	starBase	None	0.5483
RAID00994260	hsa-let-7b	miRNA	MI0000063	Homo sapiens	LIN28A	protein	79727	Homo sapiens	Nuclear magnetic resonance//EMSA (electrophoretic mobility shift assay)	RAID	26045559	0.8808
RAID00996627	hsa-miR-185-5p	miRNA	MIMAT0000455	Homo sapiens	FUS	protein	2521	Homo sapiens	CLIP-seq	starBase	None	0.5483
RAID00997050	hsa-miR-222-3p	miRNA	MIMAT0000279	Homo sapiens	LIN28A	protein	79727	Homo sapiens	CLIP-seq	starBase	None	0.5483
RAID00997125	hsa-miR-10a-5p	miRNA	MIMAT0000253	Homo sapiens	FMR1	protein	2332	Homo sapiens	CLIP-seq	starBase	None	0.5483
RAID00998289	hsa-miR-657	miRNA	MIMAT0003335	Homo sapiens	FUS	protein	2521	Homo sapiens	CLIP-seq	starBase	None	0.5483
RAID01000544	hsa-miR-1296-5p	miRNA	MIMAT0005794	Homo sapiens	FUS	protein	2521	Homo sapiens	CLIP-seq	starBase	None	0.5483
RAID01001372	mmu-let-7d-5p	miRNA	MIMAT0000383	Mus musculus	Srsf1	protein	110809	Mus musculus	CLIP-seq	starBase	None	0.5483
RAID01003362	hsa-miR-30d-5p	miRNA	MIMAT0000245	Homo sapiens	LIN28A	protein	79727	Homo sapiens	CLIP-seq	starBase	None	0.5483
RAID01006338	hsa-miR-15b-5p	miRNA	MIMAT0000417	Homo sapiens	EIF4A3	protein	9775	Homo sapiens	CLIP-seq	starBase	None	0.5483
RAID01009793	hsa-miR-152-3p	miRNA	MIMAT0000438	Homo sapiens	FUS	protein	2521	Homo sapiens	CLIP-seq	starBase	None	0.5483
RAID01011208	hsa-miR-663a	miRNA	MIMAT0003326	Homo sapiens	LIN28A	protein	79727	Homo sapiens	CLIP-seq//CLIP	NPInter//starBase	22959275	0.6606
RAID01012220	hsa-let-7f-2	miRNA	MI0000068	Homo sapiens	EIF4A3	protein	9775	Homo sapiens	CLIP-seq	starBase	None	0.5483
RAID01012421	hsa-mir-218-2	miRNA	MI0000295	Homo sapiens	DGCR8	protein	54487	Homo sapiens	CLIP-seq	starBase	None	0.5483
RAID01012983	hsa-miR-31-5p	miRNA	MIMAT0000089	Homo sapiens	PTBP1	protein	5725	Homo sapiens	CLIP-seq	starBase	None	0.5483
RAID01013248	hsa-miR-181c-5p	miRNA	MIMAT0000258	Homo sapiens	PTBP1	protein	5725	Homo sapiens	CLIP-seq	starBase	None	0.5483
RAID01013416	hsa-miR-7-5p	miRNA	MIMAT0000252	Homo sapiens	HOXD10	protein	3236	Homo sapiens	Western Blot//Reporter Assay	RAID	18922890	0.8808
RAID01014130	hsa-mir-6723	miRNA	MI0022558	Homo sapiens	IGF2BP1	protein	10642	Homo sapiens	CLIP-seq	starBase	None	0.5483
RAID01014959	mmu-let-7c-2	miRNA	MI0000560	Mus musculus	Fus	protein	233908	Mus musculus	CLIP-seq	starBase	None	0.5483
RAID01019049	hsa-mir-196a-1	miRNA	MI0000238	Homo sapiens	PTBP1	protein	5725	Homo sapiens	CLIP-seq	starBase	None	0.5483
RAID01019633	hsa-miR-29a-3p	miRNA	MIMAT0000086	Homo sapiens	LIN28B	protein	389421	Homo sapiens	CLIP-seq	starBase	None	0.5483
RAID01020996	hsa-miR-5690	miRNA	MIMAT0022482	Homo sapiens	EIF4A3	protein	9775	Homo sapiens	CLIP-seq	starBase	None	0.5483
RAID01023245	hsa-mir-101-1	miRNA	MI0000103	Homo sapiens	FUS	protein	2521	Homo sapiens	CLIP-seq	starBase	None	0.5483
RAID01023619	hsa-miR-374a-5p	miRNA	MIMAT0000727	Homo sapiens	LIN28B	protein	389421	Homo sapiens	CLIP-seq	starBase	None	0.5483
RAID01023682	hsa-mir-129-1	miRNA	MI0000252	Homo sapiens	FUS	protein	2521	Homo sapiens	CLIP-seq	starBase	None	0.5483
RAID01024535	hsa-miR-1468-5p	miRNA	MIMAT0006789	Homo sapiens	DGCR8	protein	54487	Homo sapiens	CLIP-seq	starBase	None	0.5483
RAID01025078	hsa-miR-187-3p	miRNA	MIMAT0000262	Homo sapiens	DGCR8	protein	54487	Homo sapiens	CLIP-seq	starBase	None	0.5483
RAID01025191	hsa-miR-3176	miRNA	MIMAT0015053	Homo sapiens	FUS	protein	2521	Homo sapiens	CLIP-seq	starBase	None	0.5483
RAID01025893	hsa-miR-25-3p	miRNA	MIMAT0000081	Homo sapiens	FMR1	protein	2332	Homo sapiens	CLIP-seq	starBase	None	0.5483
RAID01026860	hsa-miR-222-3p	miRNA	MIMAT0000279	Homo sapiens	PTBP1	protein	5725	Homo sapiens	CLIP-seq	starBase	None	0.5483
RAID01028893	hsa-mir-29b-2	miRNA	MI0000107	Homo sapiens	FUS	protein	2521	Homo sapiens	CLIP-seq	starBase	None	0.5483
RAID01028995	hsa-mir-24-2	miRNA	MI0000081	Homo sapiens	DGCR8	protein	54487	Homo sapiens	CLIP-seq	starBase	None	0.5483
RAID01030532	hsa-mir-4664	miRNA	MI0017294	Homo sapiens	DGCR8	protein	54487	Homo sapiens	CLIP-seq	starBase	None	0.5483
RAID01031262	hsa-miR-20b-3p	miRNA	MIMAT0004752	Homo sapiens	LIN28A	protein	79727	Homo sapiens	CLIP	NPInter	22959275	0.5483
RAID01031348	hsa-miR-18a-5p	miRNA	MIMAT0000072	Homo sapiens	LIN28A	protein	79727	Homo sapiens	CLIP-seq	starBase	None	0.5483
RAID01031611	mmu-mir-181b-2	miRNA	MI0000823	Mus musculus	Fus	protein	233908	Mus musculus	CLIP-seq	starBase	None	0.5483
RAID01033620	hsa-miR-192-5p	miRNA	MIMAT0000222	Homo sapiens	FMR1	protein	2332	Homo sapiens	CLIP-seq	starBase	None	0.5483
RAID01037134	hsa-miR-146a-5p	miRNA	MIMAT0000449	Homo sapiens	LIN28B	protein	389421	Homo sapiens	CLIP-seq	starBase	None	0.5483
RAID01037404	mmu-mir-3091	miRNA	MI0014084	Mus musculus	Fus	protein	233908	Mus musculus	CLIP-seq	starBase	None	0.5483
RAID01038670	hsa-miR-200c-3p	miRNA	MIMAT0000617	Homo sapiens	FXR1	protein	8087	Homo sapiens	CLIP-seq	starBase	None	0.5483
RAID01041025	hsa-miR-222-3p	miRNA	MIMAT0000279	Homo sapiens	FXR1	protein	8087	Homo sapiens	CLIP-seq	starBase	None	0.5483
RAID01041195	hsa-miR-3654	miRNA	MIMAT0018074	Homo sapiens	LIN28A	protein	79727	Homo sapiens	CLIP	NPInter	22959275	0.5483
RAID01043111	hsa-miR-564	miRNA	MIMAT0003228	Homo sapiens	FUS	protein	2521	Homo sapiens	CLIP-seq	starBase	None	0.5483
RAID01045882	hsa-let-7a-1	miRNA	MI0000060	Homo sapiens	LIN28B	protein	389421	Homo sapiens	RT-PCR//CLIP-seq	starBase//RAID	21853155	0.8785
RAID01047262	hsa-miR-191-5p	miRNA	MIMAT0000440	Homo sapiens	LIN28A	protein	79727	Homo sapiens	CLIP-seq	starBase	None	0.5483
RAID01047805	hsa-miR-27b-3p	miRNA	MIMAT0000419	Homo sapiens	LIN28A	protein	79727	Homo sapiens	CLIP-seq	starBase	None	0.5483
RAID01048493	hsa-miR-25-5p	miRNA	MIMAT0004498	Homo sapiens	LIN28A	protein	79727	Homo sapiens	CLIP	NPInter	22959275	0.5483
RAID01049639	hsa-let-7e-5p	miRNA	MIMAT0000066	Homo sapiens	FUS	protein	2521	Homo sapiens	CLIP-seq	starBase	None	0.5483
RAID01051957	hsa-miR-221-3p	miRNA	MIMAT0000278	Homo sapiens	BNIP3L	protein	665	Homo sapiens	Reporter Assay//RT-PCR//Western Blot//Microarray	RAID	20018759	0.9786
RAID01052635	hsa-miR-939-5p	miRNA	MIMAT0004982	Homo sapiens	FUS	protein	2521	Homo sapiens	CLIP-seq	starBase	None	0.5483
RAID01054228	hsa-let-7i-5p	miRNA	MIMAT0000415	Homo sapiens	FUS	protein	2521	Homo sapiens	CLIP-seq	starBase	None	0.5483
RAID01054766	hsa-miR-634	miRNA	MIMAT0003304	Homo sapiens	FUS	protein	2521	Homo sapiens	CLIP-seq	starBase	None	0.5483
RAID01059479	hsa-miR-18a-5p	miRNA	MIMAT0000072	Homo sapiens	FMR1	protein	2332	Homo sapiens	CLIP-seq	starBase	None	0.5483
RAID01059678	hsa-miR-155-5p	miRNA	MIMAT0000646	Homo sapiens	MEIS1	protein	4211	Homo sapiens	Reporter Assay//RT-PCR//Western Blot	RAID	18950466	0.9526
RAID01060052	mmu-mir-30c-1	miRNA	MI0000547	Mus musculus	Fus	protein	233908	Mus musculus	CLIP-seq	starBase	None	0.5483
RAID01060170	hsa-miR-301b-3p	miRNA	MIMAT0004958	Homo sapiens	LIN28B	protein	389421	Homo sapiens	CLIP-seq	starBase	None	0.5483
RAID01063949	hsa-let-7e-3p	miRNA	MIMAT0004485	Homo sapiens	LIN28A	protein	79727	Homo sapiens	CLIP	NPInter	22959275	0.5483
RAID01068596	hsa-miR-423-3p	miRNA	MIMAT0001340	Homo sapiens	TIAL1	protein	7073	Homo sapiens	CLIP-seq	starBase	None	0.5483
RAID01068787	hsa-mir-7-1	miRNA	MI0000263	Homo sapiens	EIF4A3	protein	9775	Homo sapiens	CLIP-seq	starBase	None	0.5483
RAID01072470	mmu-miR-877-5p	miRNA	MIMAT0004861	Mus musculus	Fus	protein	233908	Mus musculus	CLIP-seq	starBase	None	0.5483
RAID01076534	hsa-mir-26a-1	miRNA	MI0000083	Homo sapiens	DGCR8	protein	54487	Homo sapiens	CLIP-seq	starBase	None	0.5483
RAID01076767	hsa-miR-26a-5p	miRNA	MIMAT0000082	Homo sapiens	LIN28A	protein	79727	Homo sapiens	CLIP	NPInter	22959275	0.5483
RAID01077136	hsa-miR-561-3p	miRNA	MIMAT0003225	Homo sapiens	DGCR8	protein	54487	Homo sapiens	CLIP-seq	starBase	None	0.5483
RAID01079258	mmu-miR-5114	miRNA	MIMAT0020622	Mus musculus	Mbnl1	protein	56758	Mus musculus	CLIP-seq	starBase	None	0.5483
RAID01082053	hsa-miR-1291	miRNA	MIMAT0005881	Homo sapiens	LIN28A	protein	79727	Homo sapiens	CLIP	NPInter	22959275	0.5483
RAID01082531	hsa-miR-29b-2-5p	miRNA	MIMAT0004515	Homo sapiens	LIN28A	protein	79727	Homo sapiens	CLIP	NPInter	22959275	0.5483
RAID01083331	hsa-miR-99b-5p	miRNA	MIMAT0000689	Homo sapiens	FMR1	protein	2332	Homo sapiens	CLIP-seq	starBase	None	0.5483
RAID01085280	mmu-miR-30a-5p	miRNA	MIMAT0000128	Mus musculus	Fus	protein	233908	Mus musculus	CLIP-seq	starBase	None	0.5483
RAID01085543	hsa-miR-652-5p	miRNA	MIMAT0022709	Homo sapiens	LIN28A	protein	79727	Homo sapiens	CLIP	NPInter	22959275	0.5483
RAID01086285	hsa-miR-423-3p	miRNA	MIMAT0001340	Homo sapiens	FXR1	protein	8087	Homo sapiens	CLIP-seq	starBase	None	0.5483
RAID01088134	hsa-miR-4637	miRNA	MIMAT0019694	Homo sapiens	EIF4A3	protein	9775	Homo sapiens	CLIP-seq	starBase	None	0.5483
RAID01090293	hsa-let-7i-5p	miRNA	MIMAT0000415	Homo sapiens	LIN28B	protein	389421	Homo sapiens	Western Blot//EMSA (electrophoretic mobility shift assay)//RT-PCR//CLIP-seq	starBase//RAID	26440890	0.9786
RAID01091936	cel-lin-4-5p	miRNA	MIMAT0000002	Caenorhabditis elegans	flh-1	protein	177749	Caenorhabditis elegans	Yeast two-hybrid analysis	NPInter	18794349	0.7311
RAID01093021	hsa-miR-1236-3p	miRNA	MIMAT0005591	Homo sapiens	EIF4A3	protein	9775	Homo sapiens	CLIP-seq	starBase	None	0.5483
RAID01093973	hsa-miR-361-5p	miRNA	MIMAT0000703	Homo sapiens	FMR1	protein	2332	Homo sapiens	CLIP-seq	starBase	None	0.5483
RAID01098322	hsa-miR-614	miRNA	MIMAT0003282	Homo sapiens	UPF1	protein	5976	Homo sapiens	CLIP-seq	starBase	None	0.5483
RAID01099569	hsa-miR-186-5p	miRNA	MIMAT0000456	Homo sapiens	DGCR8	protein	54487	Homo sapiens	CLIP-seq	starBase	None	0.5483
RAID01100124	hsa-miR-3134	miRNA	MIMAT0015000	Homo sapiens	VEGFA	protein	7422	Homo sapiens	RT-PCR//Reporter Assay	NPInter	23823647	0.8808
RAID01102088	hsa-mir-3198-2	miRNA	MI0017335	Homo sapiens	FXR2	protein	9513	Homo sapiens	CLIP-seq	starBase	None	0.5483
RAID01102919	mmu-miR-101b-3p	miRNA	MIMAT0000616	Mus musculus	Fus	protein	233908	Mus musculus	CLIP-seq	starBase	None	0.5483
RAID01103006	hsa-mir-92a-2	miRNA	MI0000094	Homo sapiens	MOV10	protein	4343	Homo sapiens	CLIP-seq	starBase	None	0.5483
RAID01104235	hsa-miR-3200-3p	miRNA	MIMAT0015085	Homo sapiens	DGCR8	protein	54487	Homo sapiens	CLIP-seq	starBase	None	0.5483
RAID01104447	hsa-mir-101-1	miRNA	MI0000103	Homo sapiens	EIF4A3	protein	9775	Homo sapiens	CLIP-seq	starBase	None	0.5483
RAID01107634	mmu-mir-145a	miRNA	MI0000169	Mus musculus	Fus	protein	233908	Mus musculus	CLIP-seq	starBase	None	0.5483
RAID01107808	hsa-miR-27a-3p	miRNA	MIMAT0000084	Homo sapiens	LIN28A	protein	79727	Homo sapiens	CLIP-seq	starBase	None	0.5483
RAID01109845	hsa-mir-3648-1	miRNA	MI0016048	Homo sapiens	FXR2	protein	9513	Homo sapiens	CLIP-seq	starBase	None	0.5483
RAID01111616	hsa-miR-671-3p	miRNA	MIMAT0004819	Homo sapiens	LIN28A	protein	79727	Homo sapiens	CLIP	NPInter	22959275	0.5483
RAID01113387	hsa-mir-4697	miRNA	MI0017330	Homo sapiens	FUS	protein	2521	Homo sapiens	CLIP-seq	starBase	None	0.5483
RAID01114406	hsa-miR-196b-5p	miRNA	MIMAT0001080	Homo sapiens	LIN28B	protein	389421	Homo sapiens	CLIP-seq	starBase	None	0.5483
RAID01117052	hsa-miR-149-5p	miRNA	MIMAT0000450	Homo sapiens	DGCR8	protein	54487	Homo sapiens	CLIP-seq	starBase	None	0.5483
RAID01121578	hsa-mir-3687-1	miRNA	MI0016088	Homo sapiens	ALKBH5	protein	54890	Homo sapiens	CLIP-seq	starBase	None	0.5483
RAID01121670	hsa-mir-92a-1	miRNA	MI0000093	Homo sapiens	LIN28A	protein	79727	Homo sapiens	CLIP-seq	starBase	None	0.5483
RAID01124354	hsa-miR-577	miRNA	MIMAT0003242	Homo sapiens	DGCR8	protein	54487	Homo sapiens	CLIP-seq	starBase	None	0.5483
RAID01126292	hsa-miR-3165	miRNA	MIMAT0015039	Homo sapiens	HNRNPC	protein	3183	Homo sapiens	CLIP-seq	starBase	None	0.5483
RAID01127009	hsa-mir-16-1	miRNA	MI0000070	Homo sapiens	IGF2BP2	protein	10644	Homo sapiens	CLIP-seq	starBase	None	0.5483
RAID01127522	mmu-miR-326-3p	miRNA	MIMAT0000559	Mus musculus	Fus	protein	233908	Mus musculus	CLIP-seq	starBase	None	0.5483
RAID01127812	hsa-miR-342-3p	miRNA	MIMAT0000753	Homo sapiens	DGCR8	protein	54487	Homo sapiens	CLIP-seq	starBase	None	0.5483
RAID01128496	hsa-miR-4523	miRNA	MIMAT0019061	Homo sapiens	FMR1	protein	2332	Homo sapiens	CLIP-seq	starBase	None	0.5483
RAID01130187	hsa-miR-4741	miRNA	MIMAT0019871	Homo sapiens	FMR1	protein	2332	Homo sapiens	CLIP-seq	starBase	None	0.5483
RAID01131817	mmu-miR-362-5p	miRNA	MIMAT0000706	Mus musculus	Fus	protein	233908	Mus musculus	CLIP-seq	starBase	None	0.5483
RAID01136654	hsa-mir-1185-2	miRNA	MI0003821	Homo sapiens	FUS	protein	2521	Homo sapiens	CLIP-seq	starBase	None	0.5483
RAID01136803	hsa-miR-6080	miRNA	MIMAT0023705	Homo sapiens	ELAVL1	protein	1994	Homo sapiens	CLIP-seq	starBase	None	0.5483
RAID01136982	hsa-miR-652-3p	miRNA	MIMAT0003322	Homo sapiens	DGCR8	protein	54487	Homo sapiens	CLIP-seq	starBase	None	0.5483
RAID01137213	mmu-miR-5114	miRNA	MIMAT0020622	Mus musculus	Ptbp2	protein	56195	Mus musculus	CLIP-seq	starBase	None	0.5483
RAID01137236	hsa-miR-3618	miRNA	MIMAT0017998	Homo sapiens	ZC3H7B	protein	23264	Homo sapiens	CLIP-seq	starBase	None	0.5483
RAID01137916	hsa-miR-100-5p	miRNA	MIMAT0000098	Homo sapiens	DGCR8	protein	54487	Homo sapiens	CLIP-seq	starBase	None	0.5483
RAID01138348	hsa-mir-4680	miRNA	MI0017312	Homo sapiens	ELAVL1	protein	1994	Homo sapiens	CLIP-seq	starBase	None	0.5483
RAID01140426	mmu-miR-222-3p	miRNA	MIMAT0000670	Mus musculus	Cdx2	protein	12591	Mus musculus	RT-PCR	NPInter	23933602	0.7311
RAID01142788	hsa-miR-338-3p	miRNA	MIMAT0000763	Homo sapiens	DGCR8	protein	54487	Homo sapiens	CLIP-seq	starBase	None	0.5483
RAID01144153	hsa-let-7a-5p	miRNA	MIMAT0000062	Homo sapiens	IGF2BP1	protein	10642	Homo sapiens	RIP (RNA Immunoprecipitation)//PAR-CLIP	RAID	23069990	0.8785
RAID01146082	hsa-miR-345-5p	miRNA	MIMAT0000772	Homo sapiens	DGCR8	protein	54487	Homo sapiens	CLIP-seq	starBase	None	0.5483
RAID01148580	hsa-miR-1237-3p	miRNA	MIMAT0005592	Homo sapiens	EIF4A3	protein	9775	Homo sapiens	CLIP-seq	starBase	None	0.5483
RAID01148924	hsa-mir-5006	miRNA	MI0017873	Homo sapiens	U2AF2	protein	11338	Homo sapiens	CLIP-seq	starBase	None	0.5483
RAID01149982	hsa-mir-4804	miRNA	MI0017452	Homo sapiens	TNRC6A	protein	27327	Homo sapiens	CLIP-seq	starBase	None	0.5483
RAID01150407	hsa-mir-21	miRNA	MI0000077	Homo sapiens	ADARB1	protein	104	Homo sapiens	RT-PCR//Northern Blot	RAID	25582055	0.8808
RAID01151072	hsa-miR-221-3p	miRNA	MIMAT0000278	Homo sapiens	PTBP1	protein	5725	Homo sapiens	CLIP-seq	starBase	None	0.5483
RAID01152019	hsa-miR-4683	miRNA	MIMAT0019768	Homo sapiens	FMR1	protein	2332	Homo sapiens	CLIP-seq	starBase	None	0.5483
RAID01152398	hsa-miR-4492	miRNA	MIMAT0019027	Homo sapiens	EIF4A3	protein	9775	Homo sapiens	CLIP-seq	starBase	None	0.5483
RAID01152624	mmu-mir-21a	miRNA	MI0000569	Mus musculus	Srsf1	protein	110809	Mus musculus	CLIP-seq	starBase	None	0.5483
RAID01152778	hsa-miR-339-5p	miRNA	MIMAT0000764	Homo sapiens	DGCR8	protein	54487	Homo sapiens	CLIP-seq	starBase	None	0.5483
RAID01152997	hsa-mir-4727	miRNA	MI0017364	Homo sapiens	UPF1	protein	5976	Homo sapiens	CLIP-seq	starBase	None	0.5483
RAID01153208	hsa-miR-3176	miRNA	MIMAT0015053	Homo sapiens	TNRC6A	protein	27327	Homo sapiens	CLIP-seq	starBase	None	0.5483
RAID01154265	hsa-miR-191-5p	miRNA	MIMAT0000440	Homo sapiens	FUS	protein	2521	Homo sapiens	CLIP-seq	starBase	None	0.5483
RAID01154611	hsa-miR-27a-3p	miRNA	MIMAT0000084	Homo sapiens	SMAD5	protein	4090	Homo sapiens	RT-PCR	RAID	25265485	0.7311
RAID01156931	hsa-miR-17-5p	miRNA	MIMAT0000070	Homo sapiens	MOV10	protein	4343	Homo sapiens	CLIP-seq	starBase	None	0.5483
RAID01170458	hsa-miR-184	miRNA	MIMAT0000454	Homo sapiens	FMR1	protein	2332	Homo sapiens	CLIP-seq	starBase	None	0.5483
RAID01171955	hsa-mir-219a-2	miRNA	MI0000740	Homo sapiens	FUS	protein	2521	Homo sapiens	CLIP-seq	starBase	None	0.5483
RAID01172095	hsa-mir-128-2	miRNA	MI0000727	Homo sapiens	FUS	protein	2521	Homo sapiens	CLIP-seq	starBase	None	0.5483
RAID01174721	mmu-mir-128-1	miRNA	MI0000155	Mus musculus	Fus	protein	233908	Mus musculus	CLIP-seq	starBase	None	0.5483
RAID01176131	hsa-mir-128-1	miRNA	MI0000447	Homo sapiens	FUS	protein	2521	Homo sapiens	CLIP-seq	starBase	None	0.5483
RAID01176678	hsa-miR-10a-5p	miRNA	MIMAT0000253	Homo sapiens	ZC3H7B	protein	23264	Homo sapiens	CLIP-seq	starBase	None	0.5483
RAID01178151	hsa-miR-181b-3p	miRNA	MIMAT0022692	Homo sapiens	LIN28A	protein	79727	Homo sapiens	CLIP	NPInter	22959275	0.5483
RAID01178341	hsa-miR-4654	miRNA	MIMAT0019720	Homo sapiens	DGCR8	protein	54487	Homo sapiens	CLIP-seq	starBase	None	0.5483
RAID01179742	mmu-miR-337-3p	miRNA	MIMAT0000578	Mus musculus	Fus	protein	233908	Mus musculus	CLIP-seq	starBase	None	0.5483
RAID01179869	hsa-miR-34c-5p	miRNA	MIMAT0000686	Homo sapiens	E2F3	protein	1871	Homo sapiens	Western Blot//Reporter Assay	RAID	18768788	0.8808
RAID01184065	hsa-miR-33a-5p	miRNA	MIMAT0000091	Homo sapiens	DGCR8	protein	54487	Homo sapiens	CLIP-seq	starBase	None	0.5483
RAID01185788	dme-let-7-5p	miRNA	MIMAT0000396	Drosophila melanogaster	br	protein	44505	Drosophila melanogaster	Mutation analysis	NPInter	11900466	0.7311
RAID01188440	hsa-miR-34a-5p	miRNA	MIMAT0000255	Homo sapiens	FUS	protein	2521	Homo sapiens	CLIP-seq	starBase	None	0.5483
RAID01189198	hsa-miR-1286	miRNA	MIMAT0005877	Homo sapiens	DGCR8	protein	54487	Homo sapiens	CLIP-seq	starBase	None	0.5483
RAID01191581	hsa-miR-29a-3p	miRNA	MIMAT0000086	Homo sapiens	PTBP1	protein	5725	Homo sapiens	CLIP-seq	starBase	None	0.5483
RAID01192690	hsa-miR-34a-5p	miRNA	MIMAT0000255	Homo sapiens	LIN28A	protein	79727	Homo sapiens	CLIP	NPInter	22959275	0.5483
RAID01193962	hsa-miR-135b-5p	miRNA	MIMAT0000758	Homo sapiens	FMR1	protein	2332	Homo sapiens	CLIP-seq	starBase	None	0.5483
RAID01195991	hsa-miR-4683	miRNA	MIMAT0019768	Homo sapiens	EIF4A3	protein	9775	Homo sapiens	CLIP-seq	starBase	None	0.5483
RAID01196680	hsa-mir-4762	miRNA	MI0017403	Homo sapiens	EIF4A3	protein	9775	Homo sapiens	CLIP-seq	starBase	None	0.5483
RAID01196732	hsa-mir-885	miRNA	MI0005560	Homo sapiens	FUS	protein	2521	Homo sapiens	CLIP-seq	starBase	None	0.5483
RAID01198557	hsa-mir-4747	miRNA	MI0017386	Homo sapiens	TNRC6A	protein	27327	Homo sapiens	CLIP-seq	starBase	None	0.5483
RAID01198969	hsa-mir-4700	miRNA	MI0017333	Homo sapiens	IGF2BP1	protein	10642	Homo sapiens	CLIP-seq	starBase	None	0.5483
RAID01201487	hsa-let-7f-1	miRNA	MI0000067	Homo sapiens	EWSR1	protein	2130	Homo sapiens	CLIP-seq	starBase	None	0.5483
RAID01201722	hsa-miR-1281	miRNA	MIMAT0005939	Homo sapiens	EIF4A3	protein	9775	Homo sapiens	CLIP-seq	starBase	None	0.5483
RAID01203334	hsa-mir-4691	miRNA	MI0017324	Homo sapiens	DGCR8	protein	54487	Homo sapiens	CLIP-seq	starBase	None	0.5483
RAID01203613	hsa-miR-630	miRNA	MIMAT0003299	Homo sapiens	FMR1	protein	2332	Homo sapiens	CLIP-seq	starBase	None	0.5483
RAID01204487	hsa-miR-3684	miRNA	MIMAT0018112	Homo sapiens	DGCR8	protein	54487	Homo sapiens	CLIP-seq	starBase	None	0.5483
RAID01205663	hsa-miR-4647	miRNA	MIMAT0019709	Homo sapiens	FMR1	protein	2332	Homo sapiens	CLIP-seq	starBase	None	0.5483
RAID01206715	hsa-mir-3198-2	miRNA	MI0017335	Homo sapiens	IGF2BP3	protein	10643	Homo sapiens	CLIP-seq	starBase	None	0.5483
RAID01208995	hsa-mir-7-1	miRNA	MI0000263	Homo sapiens	LIN28B	protein	389421	Homo sapiens	CLIP-seq	starBase	None	0.5483
RAID01209499	hsa-miR-1180-3p	miRNA	MIMAT0005825	Homo sapiens	LIN28A	protein	79727	Homo sapiens	CLIP-seq	starBase	None	0.5483
RAID01209939	hsa-miR-663b	miRNA	MIMAT0005867	Homo sapiens	UPF1	protein	5976	Homo sapiens	CLIP-seq	starBase	None	0.5483
RAID01210353	hsa-mir-4667	miRNA	MI0017297	Homo sapiens	IGF2BP3	protein	10643	Homo sapiens	CLIP-seq	starBase	None	0.5483
RAID01215771	hsa-miR-141-3p	miRNA	MIMAT0000432	Homo sapiens	LIN28B	protein	389421	Homo sapiens	CLIP-seq	starBase	None	0.5483
RAID01219800	mmu-mir-7a-1	miRNA	MI0000728	Mus musculus	Cirbp	protein	12696	Mus musculus	CLIP-seq	starBase	None	0.5483
RAID01223961	hsa-mir-4724	miRNA	MI0017361	Homo sapiens	FMR1	protein	2332	Homo sapiens	CLIP-seq	starBase	None	0.5483
RAID01227046	hsa-miR-193a-3p	miRNA	MIMAT0000459	Homo sapiens	PTBP1	protein	5725	Homo sapiens	CLIP-seq	starBase	None	0.5483
RAID01227328	mmu-miR-130b-3p	miRNA	MIMAT0000387	Mus musculus	Fus	protein	233908	Mus musculus	CLIP-seq	starBase	None	0.5483
RAID01228121	hsa-mir-218-2	miRNA	MI0000295	Homo sapiens	FUS	protein	2521	Homo sapiens	CLIP-seq	starBase	None	0.5483
RAID01231276	hsa-mir-181a-2	miRNA	MI0000269	Homo sapiens	DGCR8	protein	54487	Homo sapiens	CLIP-seq	starBase	None	0.5483
RAID01231842	hsa-mir-92a-1	miRNA	MI0000093	Homo sapiens	EWSR1	protein	2130	Homo sapiens	CLIP-seq	starBase	None	0.5483
RAID01237335	hsa-miR-132-3p	miRNA	MIMAT0000426	Homo sapiens	PTBP1	protein	5725	Homo sapiens	CLIP-seq	starBase	None	0.5483
RAID01237541	hsa-miR-33a-5p	miRNA	MIMAT0000091	Homo sapiens	FMR1	protein	2332	Homo sapiens	CLIP-seq	starBase	None	0.5483
RAID01237562	hsa-miR-210-3p	miRNA	MIMAT0000267	Homo sapiens	PTBP1	protein	5725	Homo sapiens	CLIP-seq	starBase	None	0.5483
RAID01237771	hsa-miR-5047	miRNA	MIMAT0020541	Homo sapiens	SRSF1	protein	6426	Homo sapiens	CLIP-seq	starBase	None	0.5483
RAID01243631	hsa-miR-29c-3p	miRNA	MIMAT0000681	Homo sapiens	CDK6	protein	1021	Homo sapiens	Reporter Assay//RT-PCR//Western Blot	RAID	20086245	0.9526
RAID01245268	hsa-miR-1281	miRNA	MIMAT0005939	Homo sapiens	UPF1	protein	5976	Homo sapiens	CLIP-seq	starBase	None	0.5483
RAID01245911	mmu-miR-31-5p	miRNA	MIMAT0000538	Mus musculus	Fus	protein	233908	Mus musculus	CLIP-seq	starBase	None	0.5483
RAID01248851	mmu-mir-467b	miRNA	MI0004671	Mus musculus	Fus	protein	233908	Mus musculus	CLIP-seq	starBase	None	0.5483
RAID01250432	hsa-miR-1181	miRNA	MIMAT0005826	Homo sapiens	EIF4A3	protein	9775	Homo sapiens	CLIP-seq	starBase	None	0.5483
RAID01250871	hsa-miR-221-3p	miRNA	MIMAT0000278	Homo sapiens	HNRNPD	protein	3184	Homo sapiens	RIP (RNA Immunoprecipitation)//Western Blot//Reporter Assay//RT-PCR	RAID	20435889	0.982
RAID01252957	hsa-mir-3179-1	miRNA	MI0014213	Homo sapiens	EIF4A3	protein	9775	Homo sapiens	CLIP-seq	starBase	None	0.5483
RAID01253789	mmu-miR-370-3p	miRNA	MIMAT0001095	Mus musculus	Fus	protein	233908	Mus musculus	CLIP-seq	starBase	None	0.5483
RAID01255121	mmu-miR-1903	miRNA	MIMAT0007868	Mus musculus	Srsf2	protein	20382	Mus musculus	CLIP-seq	starBase	None	0.5483
RAID01255194	hsa-miR-761	miRNA	MIMAT0010364	Homo sapiens	EIF4A3	protein	9775	Homo sapiens	CLIP-seq	starBase	None	0.5483
RAID01255851	hsa-mir-4700	miRNA	MI0017333	Homo sapiens	LIN28A	protein	79727	Homo sapiens	CLIP-seq	starBase	None	0.5483
RAID01256191	hsa-miR-532-5p	miRNA	MIMAT0002888	Homo sapiens	DGCR8	protein	54487	Homo sapiens	CLIP-seq	starBase	None	0.5483
RAID01256900	hsa-miR-491-5p	miRNA	MIMAT0002807	Homo sapiens	FUS	protein	2521	Homo sapiens	CLIP-seq	starBase	None	0.5483
RAID01257748	hsa-mir-4720	miRNA	MI0017355	Homo sapiens	LIN28B	protein	389421	Homo sapiens	CLIP-seq	starBase	None	0.5483
RAID01258451	hsa-miR-152-3p	miRNA	MIMAT0000438	Homo sapiens	LIN28B	protein	389421	Homo sapiens	CLIP-seq	starBase	None	0.5483
RAID01261176	hsa-let-7f-2	miRNA	MI0000068	Homo sapiens	DGCR8	protein	54487	Homo sapiens	CLIP-seq	starBase	None	0.5483
RAID01261823	hsa-miR-149-5p	miRNA	MIMAT0000450	Homo sapiens	FXR1	protein	8087	Homo sapiens	CLIP-seq	starBase	None	0.5483
RAID01264150	hsa-let-7i	miRNA	MI0000434	Homo sapiens	LIN28A	protein	79727	Homo sapiens	Nuclear magnetic resonance//EMSA (electrophoretic mobility shift assay)	RAID	26045559	0.8808
RAID01269754	hsa-miR-205-5p	miRNA	MIMAT0000266	Homo sapiens	FMR1	protein	2332	Homo sapiens	CLIP-seq	starBase	None	0.5483
RAID01271273	hsa-miR-15b-5p	miRNA	MIMAT0000417	Homo sapiens	DGCR8	protein	54487	Homo sapiens	CLIP-seq	starBase	None	0.5483
RAID01271687	hsa-miR-181c-5p	miRNA	MIMAT0000258	Homo sapiens	LIN28B	protein	389421	Homo sapiens	CLIP-seq	starBase	None	0.5483
RAID01272303	hsa-miR-96-5p	miRNA	MIMAT0000095	Homo sapiens	PTBP1	protein	5725	Homo sapiens	CLIP-seq	starBase	None	0.5483
RAID01273351	hsa-let-7a-5p	miRNA	MIMAT0000062	Homo sapiens	AGO1	protein	26523	Homo sapiens	Northern Blot//IP (immunoprecipitation)	RAID	22844086	0.8808
RAID01273596	hsa-mir-4774	miRNA	MI0017417	Homo sapiens	FUS	protein	2521	Homo sapiens	CLIP-seq	starBase	None	0.5483
RAID01273981	hsa-miR-411-5p	miRNA	MIMAT0003329	Homo sapiens	FUS	protein	2521	Homo sapiens	CLIP-seq	starBase	None	0.5483
RAID01275885	hsa-miR-660-5p	miRNA	MIMAT0003338	Homo sapiens	FMR1	protein	2332	Homo sapiens	CLIP-seq	starBase	None	0.5483
RAID01280037	mmu-mir-425	miRNA	MI0001447	Mus musculus	Rbm3	protein	19652	Mus musculus	CLIP-seq	starBase	None	0.5483
RAID01281832	hsa-miR-4508	miRNA	MIMAT0019045	Homo sapiens	FUS	protein	2521	Homo sapiens	CLIP-seq	starBase	None	0.5483
RAID01282105	hsa-miR-299-3p	miRNA	MIMAT0000687	Homo sapiens	LIN28B	protein	389421	Homo sapiens	CLIP-seq	starBase	None	0.5483
RAID01290746	mmu-miR-221-3p	miRNA	MIMAT0000669	Mus musculus	Cdx2	protein	12591	Mus musculus	RT-PCR	NPInter	23933602	0.7311
RAID01293438	hsa-miR-302b-3p	miRNA	MIMAT0000715	Homo sapiens	LIN28A	protein	79727	Homo sapiens	CLIP	NPInter	22959275	0.5483
RAID01296259	mmu-mir-9-3	miRNA	MI0000721	Mus musculus	Fus	protein	233908	Mus musculus	CLIP-seq	starBase	None	0.5483
RAID01298117	hsa-miR-4426	miRNA	MIMAT0018941	Homo sapiens	U2AF2	protein	11338	Homo sapiens	CLIP-seq	starBase	None	0.5483
RAID01299956	hsa-miR-1178-3p	miRNA	MIMAT0005823	Homo sapiens	U2AF2	protein	11338	Homo sapiens	CLIP-seq	starBase	None	0.5483
RAID01300416	mmu-mir-290a	miRNA	MI0000388	Mus musculus	Ezh2	protein	14056	Mus musculus	CLIP-seq	starBase	None	0.5483
RAID01301744	hsa-miR-659-3p	miRNA	MIMAT0003337	Homo sapiens	EIF4A3	protein	9775	Homo sapiens	CLIP-seq	starBase	None	0.5483
RAID01304260	hsa-mir-7-1	miRNA	MI0000263	Homo sapiens	DGCR8	protein	54487	Homo sapiens	CLIP-seq	starBase	None	0.5483
RAID01304794	hsa-miR-874-3p	miRNA	MIMAT0004911	Homo sapiens	FUS	protein	2521	Homo sapiens	CLIP-seq	starBase	None	0.5483
RAID01305764	hsa-miR-3619-5p	miRNA	MIMAT0017999	Homo sapiens	EIF4A3	protein	9775	Homo sapiens	CLIP-seq	starBase	None	0.5483
RAID01308554	hsa-miR-30d-5p	miRNA	MIMAT0000245	Homo sapiens	PTBP1	protein	5725	Homo sapiens	CLIP-seq	starBase	None	0.5483
RAID01308577	mmu-mir-344d-2	miRNA	MI0004619	Mus musculus	Fus	protein	233908	Mus musculus	CLIP-seq	starBase	None	0.5483
RAID01310616	hsa-miR-424-5p	miRNA	MIMAT0001341	Homo sapiens	FUS	protein	2521	Homo sapiens	CLIP-seq	starBase	None	0.5483
RAID01310671	hsa-miR-1205	miRNA	MIMAT0005869	Homo sapiens	EIF4A3	protein	9775	Homo sapiens	CLIP-seq	starBase	None	0.5483
RAID01311761	hsa-miR-4748	miRNA	MIMAT0019884	Homo sapiens	EIF4A3	protein	9775	Homo sapiens	CLIP-seq	starBase	None	0.5483
RAID01314160	cel-miR-53-5p	miRNA	MIMAT0000024	Caenorhabditis elegans	flh-1	protein	177749	Caenorhabditis elegans	Yeast two-hybrid analysis	NPInter	18794349	0.7311
RAID01314959	hsa-mir-4640	miRNA	MI0017267	Homo sapiens	U2AF2	protein	11338	Homo sapiens	CLIP-seq	starBase	None	0.5483
RAID01318944	hsa-miR-181d-5p	miRNA	MIMAT0002821	Homo sapiens	LIN28B	protein	389421	Homo sapiens	CLIP-seq	starBase	None	0.5483
RAID01318956	hsa-mir-770	miRNA	MI0005118	Homo sapiens	FUS	protein	2521	Homo sapiens	CLIP-seq	starBase	None	0.5483
RAID01319897	hsa-mir-4720	miRNA	MI0017355	Homo sapiens	EIF4A3	protein	9775	Homo sapiens	CLIP-seq	starBase	None	0.5483
RAID01323882	mmu-miR-17-5p	miRNA	MIMAT0000649	Mus musculus	Adcy5	protein	224129	Mus musculus	Reporter Assay	RAID	25077541	0.7311
RAID01324533	hsa-miR-210-3p	miRNA	MIMAT0000267	Homo sapiens	FXR1	protein	8087	Homo sapiens	CLIP-seq	starBase	None	0.5483
RAID01325164	hsa-miR-3940-3p	miRNA	MIMAT0018356	Homo sapiens	EIF4A3	protein	9775	Homo sapiens	CLIP-seq	starBase	None	0.5483
RAID01325250	hsa-miR-18b-5p	miRNA	MIMAT0001412	Homo sapiens	PTBP1	protein	5725	Homo sapiens	CLIP-seq	starBase	None	0.5483
RAID01326243	hsa-miR-96-5p	miRNA	MIMAT0000095	Homo sapiens	LIN28A	protein	79727	Homo sapiens	CLIP-seq	starBase	None	0.5483
RAID01328015	hsa-miR-106a-5p	miRNA	MIMAT0000103	Homo sapiens	MYC	protein	4609	Homo sapiens	Reporter Assay//Northern Blot//Western Blot	RAID	15944709	0.9526
RAID01328640	hsa-mir-181a-1	miRNA	MI0000289	Homo sapiens	FUS	protein	2521	Homo sapiens	CLIP-seq	starBase	None	0.5483
RAID01330541	mmu-miR-671-5p	miRNA	MIMAT0003731	Mus musculus	Fus	protein	233908	Mus musculus	CLIP-seq	starBase	None	0.5483
RAID01332042	hsa-miR-4488	miRNA	MIMAT0019022	Homo sapiens	LIN28A	protein	79727	Homo sapiens	CLIP-seq	starBase	None	0.5483
RAID01332125	mmu-mir-764	miRNA	MI0004310	Mus musculus	Fus	protein	233908	Mus musculus	CLIP-seq	starBase	None	0.5483
RAID01333168	hsa-mir-486-1	miRNA	MI0002470	Homo sapiens	DGCR8	protein	54487	Homo sapiens	CLIP-seq	starBase	None	0.5483
RAID01334852	hsa-miR-1180-3p	miRNA	MIMAT0005825	Homo sapiens	FUS	protein	2521	Homo sapiens	CLIP-seq	starBase	None	0.5483
RAID01335130	mmu-mir-199b	miRNA	MI0000714	Mus musculus	Fus	protein	233908	Mus musculus	CLIP-seq	starBase	None	0.5483
RAID01335751	hsa-miR-4751	miRNA	MIMAT0019888	Homo sapiens	IGF2BP2	protein	10644	Homo sapiens	CLIP-seq	starBase	None	0.5483
RAID01337077	hsa-mir-181a-1	miRNA	MI0000289	Homo sapiens	EIF4A3	protein	9775	Homo sapiens	CLIP-seq	starBase	None	0.5483
RAID01339104	hsa-miR-30a-3p	miRNA	MIMAT0000088	Homo sapiens	LIN28A	protein	79727	Homo sapiens	CLIP	NPInter	22959275	0.5483
RAID01339813	hsa-miR-3151-5p	miRNA	MIMAT0015024	Homo sapiens	FUS	protein	2521	Homo sapiens	CLIP-seq	starBase	None	0.5483
RAID01340383	hsa-miR-324-5p	miRNA	MIMAT0000761	Homo sapiens	LIN28A	protein	79727	Homo sapiens	CLIP	NPInter	22959275	0.5483
RAID01342128	hsa-miR-942-5p	miRNA	MIMAT0004985	Homo sapiens	DGCR8	protein	54487	Homo sapiens	CLIP-seq	starBase	None	0.5483
RAID01343050	hsa-mir-101-1	miRNA	MI0000103	Homo sapiens	DGCR8	protein	54487	Homo sapiens	CLIP-seq	starBase	None	0.5483
RAID01344501	hsa-miR-126-3p	miRNA	MIMAT0000445	Homo sapiens	LIN28A	protein	79727	Homo sapiens	CLIP-seq	starBase	None	0.5483
RAID01349810	hsa-miR-3176	miRNA	MIMAT0015053	Homo sapiens	IGF2BP1	protein	10642	Homo sapiens	CLIP-seq	starBase	None	0.5483
RAID01352972	hsa-miR-423-3p	miRNA	MIMAT0001340	Homo sapiens	EIF4A3	protein	9775	Homo sapiens	CLIP-seq	starBase	None	0.5483
RAID01354728	hsa-miR-33a-5p	miRNA	MIMAT0000091	Homo sapiens	FUS	protein	2521	Homo sapiens	CLIP-seq	starBase	None	0.5483
RAID01355705	hsa-miR-10a-5p	miRNA	MIMAT0000253	Homo sapiens	LIN28A	protein	79727	Homo sapiens	CLIP-seq//CLIP	NPInter//starBase	22959275	0.6606
RAID01356188	hsa-miR-190b	miRNA	MIMAT0004929	Homo sapiens	FUS	protein	2521	Homo sapiens	CLIP-seq	starBase	None	0.5483
RAID01359125	hsa-mir-3687-1	miRNA	MI0016088	Homo sapiens	LIN28B	protein	389421	Homo sapiens	CLIP-seq	starBase	None	0.5483
RAID01364243	hsa-mir-124-1	miRNA	MI0000443	Homo sapiens	FUS	protein	2521	Homo sapiens	CLIP-seq	starBase	None	0.5483
RAID01370142	hsa-mir-6723	miRNA	MI0022558	Homo sapiens	DGCR8	protein	54487	Homo sapiens	CLIP-seq	starBase	None	0.5483
RAID01372862	cel-lin-4-5p	miRNA	MIMAT0000002	Caenorhabditis elegans	dcr-1	protein	176138	Caenorhabditis elegans	RNA interference	NPInter	11461699	0.7311
RAID01374866	hsa-miR-424-5p	miRNA	MIMAT0001341	Homo sapiens	EIF4A3	protein	9775	Homo sapiens	CLIP-seq	starBase	None	0.5483
RAID01377863	hsa-miR-4657	miRNA	MIMAT0019724	Homo sapiens	TNRC6A	protein	27327	Homo sapiens	CLIP-seq	starBase	None	0.5483
RAID01377950	hsa-mir-329-2	miRNA	MI0001726	Homo sapiens	FUS	protein	2521	Homo sapiens	CLIP-seq	starBase	None	0.5483
RAID01379950	hsa-miR-200a-3p	miRNA	MIMAT0000682	Homo sapiens	LIN28B	protein	389421	Homo sapiens	CLIP-seq	starBase	None	0.5483
RAID01382238	mmu-miR-320-3p	miRNA	MIMAT0000666	Mus musculus	Fus	protein	233908	Mus musculus	CLIP-seq	starBase	None	0.5483
RAID01383284	hsa-miR-345-5p	miRNA	MIMAT0000772	Homo sapiens	FXR1	protein	8087	Homo sapiens	CLIP-seq	starBase	None	0.5483
RAID01385646	hsa-miR-23c	miRNA	MIMAT0018000	Homo sapiens	FUS	protein	2521	Homo sapiens	CLIP-seq	starBase	None	0.5483
RAID01389419	hsa-miR-451a	miRNA	MIMAT0001631	Homo sapiens	FMR1	protein	2332	Homo sapiens	CLIP-seq	starBase	None	0.5483
RAID01395413	hsa-miR-23a-3p	miRNA	MIMAT0000078	Homo sapiens	NCBP3	protein	55421	Homo sapiens	CLIP-seq	starBase	None	0.5483
RAID01399230	hsa-miR-144-3p	miRNA	MIMAT0000436	Homo sapiens	FUS	protein	2521	Homo sapiens	CLIP-seq	starBase	None	0.5483
RAID01402631	hsa-miR-25-3p	miRNA	MIMAT0000081	Homo sapiens	LIN28B	protein	389421	Homo sapiens	CLIP-seq	starBase	None	0.5483
RAID01403469	hsa-miR-106a-5p	miRNA	MIMAT0000103	Homo sapiens	FUS	protein	2521	Homo sapiens	CLIP-seq	starBase	None	0.5483
RAID01403493	hsa-mir-3198-1	miRNA	MI0014246	Homo sapiens	FMR1	protein	2332	Homo sapiens	CLIP-seq	starBase	None	0.5483
RAID01405199	hsa-miR-3621	miRNA	MIMAT0018002	Homo sapiens	U2AF2	protein	11338	Homo sapiens	CLIP-seq	starBase	None	0.5483
RAID01406157	hsa-miR-17-5p	miRNA	MIMAT0000070	Homo sapiens	LIN28B	protein	389421	Homo sapiens	CLIP-seq	starBase	None	0.5483
RAID01409099	hsa-miR-922	miRNA	MIMAT0004972	Homo sapiens	UPF1	protein	5976	Homo sapiens	CLIP-seq	starBase	None	0.5483
RAID01409946	hsa-mir-516b-1	miRNA	MI0003172	Homo sapiens	LIN28A	protein	79727	Homo sapiens	CLIP-seq	starBase	None	0.5483
RAID01413288	hsa-mir-5010	miRNA	MI0017878	Homo sapiens	IGF2BP1	protein	10642	Homo sapiens	CLIP-seq	starBase	None	0.5483
RAID01413512	hsa-miR-18a-5p	miRNA	MIMAT0000072	Homo sapiens	HNRNPA1	protein	3178	Homo sapiens	RIP (RNA Immunoprecipitation)//Cross-Linking assay//RT-PCR	RAID	17558416	0.9526
RAID01415132	hsa-miR-20a-5p	miRNA	MIMAT0000075	Homo sapiens	LIN28B	protein	389421	Homo sapiens	CLIP-seq	starBase	None	0.5483
RAID01416021	mmu-mir-425	miRNA	MI0001447	Mus musculus	Fus	protein	233908	Mus musculus	CLIP-seq	starBase	None	0.5483
RAID01416132	hsa-mir-4646	miRNA	MI0017273	Homo sapiens	EIF4A3	protein	9775	Homo sapiens	CLIP-seq	starBase	None	0.5483
RAID01416733	hsa-mir-425	miRNA	MI0001448	Homo sapiens	LIN28A	protein	79727	Homo sapiens	CLIP-seq	starBase	None	0.5483
RAID01418693	hsa-miR-3134	miRNA	MIMAT0015000	Homo sapiens	SOX9	protein	6662	Homo sapiens	RT-PCR//Reporter Assay	NPInter	23823647	0.8808
RAID01421577	hsa-mir-4786	miRNA	MI0017433	Homo sapiens	DGCR8	protein	54487	Homo sapiens	CLIP-seq	starBase	None	0.5483
RAID01424141	hsa-miR-122-5p	miRNA	MIMAT0000421	Homo sapiens	FMR1	protein	2332	Homo sapiens	CLIP-seq	starBase	None	0.5483
RAID01425843	hsa-let-7a-2	miRNA	MI0000061	Homo sapiens	PTBP1	protein	5725	Homo sapiens	CLIP-seq	starBase	None	0.5483
RAID01428342	hsa-miR-221-3p	miRNA	MIMAT0000278	Homo sapiens	FMR1	protein	2332	Homo sapiens	CLIP-seq	starBase	None	0.5483
RAID01428946	hsa-miR-4307	miRNA	MIMAT0016860	Homo sapiens	HNRNPC	protein	3183	Homo sapiens	CLIP-seq	starBase	None	0.5483
RAID01429155	mmu-miR-706	miRNA	MIMAT0003496	Mus musculus	Fus	protein	233908	Mus musculus	CLIP-seq	starBase	None	0.5483
RAID01431057	hsa-mir-4762	miRNA	MI0017403	Homo sapiens	DGCR8	protein	54487	Homo sapiens	CLIP-seq	starBase	None	0.5483
RAID01435018	hsa-miR-3942-5p	miRNA	MIMAT0018358	Homo sapiens	EIF4A3	protein	9775	Homo sapiens	CLIP-seq	starBase	None	0.5483
RAID01435652	hsa-miR-4792	miRNA	MIMAT0019964	Homo sapiens	FUS	protein	2521	Homo sapiens	CLIP-seq	starBase	None	0.5483
RAID01438883	hsa-let-7b-5p	miRNA	MIMAT0000063	Homo sapiens	IGF2BP1	protein	10642	Homo sapiens	RIP (RNA Immunoprecipitation)//PAR-CLIP	RAID	23069990	0.8785
RAID01438935	hsa-miR-19b-1-5p	miRNA	MIMAT0004491	Homo sapiens	LIN28A	protein	79727	Homo sapiens	CLIP	NPInter	22959275	0.5483
RAID01439968	hsa-miR-3607-5p	miRNA	MIMAT0017984	Homo sapiens	LIN28A	protein	79727	Homo sapiens	CLIP	NPInter	22959275	0.5483
RAID01441381	hsa-miR-711	miRNA	MIMAT0012734	Homo sapiens	EIF4A3	protein	9775	Homo sapiens	CLIP-seq	starBase	None	0.5483
RAID01444825	hsa-miR-433-3p	miRNA	MIMAT0001627	Homo sapiens	FUS	protein	2521	Homo sapiens	CLIP-seq	starBase	None	0.5483
RAID01447685	hsa-miR-3615	miRNA	MIMAT0017994	Homo sapiens	LIN28A	protein	79727	Homo sapiens	CLIP-seq	starBase	None	0.5483
RAID01447819	hsa-miR-29c-3p	miRNA	MIMAT0000681	Homo sapiens	PTBP1	protein	5725	Homo sapiens	CLIP-seq	starBase	None	0.5483
RAID01448281	hsa-mir-5004	miRNA	MI0017870	Homo sapiens	EIF4A3	protein	9775	Homo sapiens	CLIP-seq	starBase	None	0.5483
RAID01449152	mmu-miR-23b-3p	miRNA	MIMAT0000125	Mus musculus	Celf1	protein	13046	Mus musculus	Western Blot//Northern Blot//Reporter Assay//RT-PCR	RAID	20299448	0.982
RAID01451885	hsa-miR-125a-5p	miRNA	MIMAT0000443	Homo sapiens	FUS	protein	2521	Homo sapiens	CLIP-seq	starBase	None	0.5483
RAID01452799	hsa-miR-196b-5p	miRNA	MIMAT0001080	Homo sapiens	FMR1	protein	2332	Homo sapiens	CLIP-seq	starBase	None	0.5483
RAID01454598	hsa-miR-26a-5p	miRNA	MIMAT0000082	Homo sapiens	HNRNPA1	protein	3178	Homo sapiens	IP (immunoprecipitation)//RT-PCR	RAID	26494299	0.8808
RAID01458082	hsa-miR-362-5p	miRNA	MIMAT0000705	Homo sapiens	EIF4A3	protein	9775	Homo sapiens	CLIP-seq	starBase	None	0.5483
RAID01458378	hsa-mir-101-1	miRNA	MI0000103	Homo sapiens	RTCB	protein	51493	Homo sapiens	CLIP-seq	starBase	None	0.5483
RAID01463416	hsa-mir-4720	miRNA	MI0017355	Homo sapiens	FXR2	protein	9513	Homo sapiens	CLIP-seq	starBase	None	0.5483
RAID01467658	hsa-miR-21-5p	miRNA	MIMAT0000076	Homo sapiens	FMR1	protein	2332	Homo sapiens	CLIP-seq	starBase	None	0.5483
RAID01469224	hsa-mir-4680	miRNA	MI0017312	Homo sapiens	EIF4A3	protein	9775	Homo sapiens	CLIP-seq	starBase	None	0.5483
RAID01469820	hsa-miR-21-5p	miRNA	MIMAT0000076	Homo sapiens	LIN28B	protein	389421	Homo sapiens	CLIP-seq	starBase	None	0.5483
RAID01471448	hsa-miR-302c-3p	miRNA	MIMAT0000717	Homo sapiens	LIN28A	protein	79727	Homo sapiens	CLIP	NPInter	22959275	0.5483
RAID01471642	mmu-mir-344-2	miRNA	MI0005495	Mus musculus	Fus	protein	233908	Mus musculus	CLIP-seq	starBase	None	0.5483
RAID01477990	hsa-miR-3145-3p	miRNA	MIMAT0015016	Homo sapiens	DGCR8	protein	54487	Homo sapiens	CLIP-seq	starBase	None	0.5483
RAID01481759	hsa-mir-4446	miRNA	MI0016789	Homo sapiens	FXR1	protein	8087	Homo sapiens	CLIP-seq	starBase	None	0.5483
RAID01482026	hsa-miR-3177-3p	miRNA	MIMAT0015054	Homo sapiens	TNRC6A	protein	27327	Homo sapiens	CLIP-seq	starBase	None	0.5483
RAID01482142	hsa-mir-181b-1	miRNA	MI0000270	Homo sapiens	PTBP1	protein	5725	Homo sapiens	CLIP-seq	starBase	None	0.5483
RAID01485071	hsa-mir-3687-1	miRNA	MI0016088	Homo sapiens	FMR1	protein	2332	Homo sapiens	CLIP-seq	starBase	None	0.5483
RAID01486644	hsa-miR-4453	miRNA	MIMAT0018975	Homo sapiens	UPF1	protein	5976	Homo sapiens	CLIP-seq	starBase	None	0.5483
RAID01487457	hsa-miR-6080	miRNA	MIMAT0023705	Homo sapiens	EIF4A3	protein	9775	Homo sapiens	CLIP-seq	starBase	None	0.5483
RAID01487787	hsa-miR-632	miRNA	MIMAT0003302	Homo sapiens	ZC3H7B	protein	23264	Homo sapiens	CLIP-seq	starBase	None	0.5483
RAID01488712	hsa-miR-671-5p	miRNA	MIMAT0003880	Homo sapiens	EIF4A3	protein	9775	Homo sapiens	CLIP-seq	starBase	None	0.5483
RAID01490058	hsa-miR-193b-3p	miRNA	MIMAT0002819	Homo sapiens	EIF4A3	protein	9775	Homo sapiens	CLIP-seq	starBase	None	0.5483
RAID01490737	hsa-miR-379-5p	miRNA	MIMAT0000733	Homo sapiens	FUS	protein	2521	Homo sapiens	CLIP-seq	starBase	None	0.5483
RAID01491909	hsa-miR-126-3p	miRNA	MIMAT0000445	Homo sapiens	LIN28B	protein	389421	Homo sapiens	CLIP-seq	starBase	None	0.5483
RAID01494164	mmu-mir-126a	miRNA	MI0000153	Mus musculus	Fus	protein	233908	Mus musculus	CLIP-seq	starBase	None	0.5483
RAID01496846	mmu-mir-3061	miRNA	MI0014023	Mus musculus	Fus	protein	233908	Mus musculus	CLIP-seq	starBase	None	0.5483
RAID01497853	hsa-miR-4296	miRNA	MIMAT0016845	Homo sapiens	ZC3H7B	protein	23264	Homo sapiens	CLIP-seq	starBase	None	0.5483
RAID01498523	hsa-miR-4488	miRNA	MIMAT0019022	Homo sapiens	FMR1	protein	2332	Homo sapiens	CLIP-seq	starBase	None	0.5483
RAID01498885	hsa-let-7d-5p	miRNA	MIMAT0000065	Homo sapiens	FUS	protein	2521	Homo sapiens	CLIP-seq	starBase	None	0.5483
RAID01501786	mmu-miR-500-3p	miRNA	MIMAT0003507	Mus musculus	Fus	protein	233908	Mus musculus	CLIP-seq	starBase	None	0.5483
RAID01501843	hsa-miR-4296	miRNA	MIMAT0016845	Homo sapiens	EIF4A3	protein	9775	Homo sapiens	CLIP-seq	starBase	None	0.5483
RAID01504457	mmu-mir-26a-2	miRNA	MI0000706	Mus musculus	Ptbp2	protein	56195	Mus musculus	CLIP-seq	starBase	None	0.5483
RAID01506222	mmu-mir-222	miRNA	MI0000710	Mus musculus	Adarb1	protein	110532	Mus musculus	RT-PCR//Northern Blot	RAID	25582055	0.8808
RAID01512808	hsa-mir-542	miRNA	MI0003686	Homo sapiens	DGCR8	protein	54487	Homo sapiens	CLIP-seq	starBase	None	0.5483
RAID01512904	mmu-miR-25-3p	miRNA	MIMAT0000652	Mus musculus	Rbm3	protein	19652	Mus musculus	CLIP-seq	starBase	None	0.5483
RAID01515551	mmu-miR-674-5p	miRNA	MIMAT0003740	Mus musculus	Fus	protein	233908	Mus musculus	CLIP-seq	starBase	None	0.5483
RAID01516399	mmu-let-7b-5p	miRNA	MIMAT0000522	Mus musculus	Cirbp	protein	12696	Mus musculus	CLIP-seq	starBase	None	0.5483
RAID01517710	hsa-miR-30a-5p	miRNA	MIMAT0000087	Homo sapiens	FUS	protein	2521	Homo sapiens	CLIP-seq	starBase	None	0.5483
RAID01526797	hsa-miR-548k	miRNA	MIMAT0005882	Homo sapiens	LIN28A	protein	79727	Homo sapiens	CLIP	NPInter	22959275	0.5483
RAID01527696	mmu-miR-1950	miRNA	MIMAT0009417	Mus musculus	Ptbp2	protein	56195	Mus musculus	CLIP-seq	starBase	None	0.5483
RAID01528337	hsa-mir-6723	miRNA	MI0022558	Homo sapiens	UPF1	protein	5976	Homo sapiens	CLIP-seq	starBase	None	0.5483
RAID01529068	hsa-miR-659-3p	miRNA	MIMAT0003337	Homo sapiens	DGCR8	protein	54487	Homo sapiens	CLIP-seq	starBase	None	0.5483
RAID01533027	hsa-miR-19a-3p	miRNA	MIMAT0000073	Homo sapiens	STAT3	protein	6774	Homo sapiens	Nucleic acid transfection//Reporter Assay//IP (immunoprecipitation)//RT-PCR	NPInter	23894411	0.982
RAID01533410	hsa-miR-320a	miRNA	MIMAT0000510	Homo sapiens	ALKBH5	protein	54890	Homo sapiens	CLIP-seq	starBase	None	0.5483
RAID01534989	hsa-miR-744-5p	miRNA	MIMAT0004945	Homo sapiens	EIF4A3	protein	9775	Homo sapiens	CLIP-seq	starBase	None	0.5483
RAID01536541	hsa-miR-335-5p	miRNA	MIMAT0000765	Homo sapiens	MMP2	protein	4313	Homo sapiens	RT-PCR//Reporter Assay	NPInter	23708561	0.8808
RAID01539594	hsa-miR-3944-3p	miRNA	MIMAT0018360	Homo sapiens	DGCR8	protein	54487	Homo sapiens	CLIP-seq	starBase	None	0.5483
RAID01541728	mmu-miR-342-3p	miRNA	MIMAT0000590	Mus musculus	Ezh2	protein	14056	Mus musculus	CLIP-seq	starBase	None	0.5483
RAID01546517	hsa-miR-1276	miRNA	MIMAT0005930	Homo sapiens	DGCR8	protein	54487	Homo sapiens	CLIP-seq	starBase	None	0.5483
RAID01546552	hsa-miR-661	miRNA	MIMAT0003324	Homo sapiens	FUS	protein	2521	Homo sapiens	CLIP-seq	starBase	None	0.5483
RAID01547064	hsa-miR-99a-5p	miRNA	MIMAT0000097	Homo sapiens	EIF4A3	protein	9775	Homo sapiens	CLIP-seq	starBase	None	0.5483
RAID01547213	hsa-miR-1236-3p	miRNA	MIMAT0005591	Homo sapiens	FUS	protein	2521	Homo sapiens	CLIP-seq	starBase	None	0.5483
RAID01551826	hsa-miR-331-3p	miRNA	MIMAT0000760	Homo sapiens	LIN28B	protein	389421	Homo sapiens	CLIP-seq	starBase	None	0.5483
RAID01562886	hsa-miR-27a-3p	miRNA	MIMAT0000084	Homo sapiens	LIN28B	protein	389421	Homo sapiens	CLIP-seq	starBase	None	0.5483
RAID01565220	mmu-let-7c-1	miRNA	MI0000559	Mus musculus	Fus	protein	233908	Mus musculus	CLIP-seq	starBase	None	0.5483
RAID01566193	hsa-mir-4640	miRNA	MI0017267	Homo sapiens	ELAVL1	protein	1994	Homo sapiens	CLIP-seq	starBase	None	0.5483
RAID01567513	hsa-mir-3064	miRNA	MI0017375	Homo sapiens	FMR1	protein	2332	Homo sapiens	CLIP-seq	starBase	None	0.5483
RAID01567664	hsa-miR-96-5p	miRNA	MIMAT0000095	Homo sapiens	NCBP3	protein	55421	Homo sapiens	CLIP-seq	starBase	None	0.5483
RAID01569924	mmu-mir-9-2	miRNA	MI0000157	Mus musculus	Fus	protein	233908	Mus musculus	CLIP-seq	starBase	None	0.5483
RAID01574694	hsa-miR-183-5p	miRNA	MIMAT0000261	Homo sapiens	EIF4A3	protein	9775	Homo sapiens	CLIP-seq	starBase	None	0.5483
RAID01575454	mmu-mir-669p-1	miRNA	MI0014064	Mus musculus	Fus	protein	233908	Mus musculus	CLIP-seq	starBase	None	0.5483
RAID01577572	hsa-miR-320a	miRNA	MIMAT0000510	Homo sapiens	FUS	protein	2521	Homo sapiens	CLIP-seq	starBase	None	0.5483
RAID01577679	hsa-miR-3174	miRNA	MIMAT0015051	Homo sapiens	DGCR8	protein	54487	Homo sapiens	CLIP-seq	starBase	None	0.5483
RAID01579859	hsa-miR-135b-5p	miRNA	MIMAT0000758	Homo sapiens	GSK3B	protein	2932	Homo sapiens	Western Blot//RT-PCR	RAID	26437223	0.8808
RAID01580201	hsa-miR-487b-3p	miRNA	MIMAT0003180	Homo sapiens	FUS	protein	2521	Homo sapiens	CLIP-seq	starBase	None	0.5483
RAID01580669	hsa-mir-3614	miRNA	MI0016004	Homo sapiens	IGF2BP3	protein	10643	Homo sapiens	CLIP-seq	starBase	None	0.5483
RAID01580846	hsa-miR-652-3p	miRNA	MIMAT0003322	Homo sapiens	LIN28A	protein	79727	Homo sapiens	CLIP-seq//CLIP	NPInter//starBase	22959275	0.6606
RAID01583443	hsa-miR-922	miRNA	MIMAT0004972	Homo sapiens	EIF4A3	protein	9775	Homo sapiens	CLIP-seq	starBase	None	0.5483
RAID01588329	hsa-miR-636	miRNA	MIMAT0003306	Homo sapiens	U2AF2	protein	11338	Homo sapiens	CLIP-seq	starBase	None	0.5483
RAID01589118	hsa-miR-203a-3p	miRNA	MIMAT0000264	Homo sapiens	LMP1	protein	3783750	Human herpesvirus 4	ISH (In Situ Hybridization)//RT-PCR//IHC (Immunohistochemistry)	RAID	22205737	0.9526
RAID01590340	hsa-miR-573	miRNA	MIMAT0003238	Homo sapiens	EIF4A3	protein	9775	Homo sapiens	CLIP-seq	starBase	None	0.5483
RAID01591221	hsa-miR-135b-5p	miRNA	MIMAT0000758	Homo sapiens	SMAD5	protein	4090	Homo sapiens	Western Blot//RT-PCR	RAID	26437223	0.8808
RAID01594185	hsa-mir-1185-1	miRNA	MI0003844	Homo sapiens	FUS	protein	2521	Homo sapiens	CLIP-seq	starBase	None	0.5483
RAID01595848	hsa-mir-4728	miRNA	MI0017365	Homo sapiens	IGF2BP3	protein	10643	Homo sapiens	CLIP-seq	starBase	None	0.5483
RAID01596380	hsa-miR-423-3p	miRNA	MIMAT0001340	Homo sapiens	DGCR8	protein	54487	Homo sapiens	CLIP-seq	starBase	None	0.5483
RAID01597690	hsa-miR-183-5p	miRNA	MIMAT0000261	Homo sapiens	FMR1	protein	2332	Homo sapiens	CLIP-seq	starBase	None	0.5483
RAID01600183	hsa-miR-296-5p	miRNA	MIMAT0000690	Homo sapiens	FMR1	protein	2332	Homo sapiens	CLIP-seq	starBase	None	0.5483
RAID01601937	hsa-mir-4758	miRNA	MI0017399	Homo sapiens	EIF4A3	protein	9775	Homo sapiens	CLIP-seq	starBase	None	0.5483
RAID01602026	hsa-mir-3648-1	miRNA	MI0016048	Homo sapiens	RTCB	protein	51493	Homo sapiens	CLIP-seq	starBase	None	0.5483
RAID01602305	hsa-miR-20a-5p	miRNA	MIMAT0000075	Homo sapiens	EIF4A3	protein	9775	Homo sapiens	CLIP-seq	starBase	None	0.5483
RAID01602416	hsa-miR-181a-5p	miRNA	MIMAT0000256	Homo sapiens	HSPA5	protein	3309	Homo sapiens	Reporter Assay//RT-PCR//Western Blot	RAID	23085757	0.9526
RAID01602557	mmu-miR-149-5p	miRNA	MIMAT0000159	Mus musculus	Fus	protein	233908	Mus musculus	CLIP-seq	starBase	None	0.5483
RAID01602720	hsa-miR-708-5p	miRNA	MIMAT0004926	Homo sapiens	FMR1	protein	2332	Homo sapiens	CLIP-seq	starBase	None	0.5483
RAID01604712	hsa-miR-3940-3p	miRNA	MIMAT0018356	Homo sapiens	CAPRIN1	protein	4076	Homo sapiens	CLIP-seq	starBase	None	0.5483
RAID01606873	hsa-mir-3607	miRNA	MI0015997	Homo sapiens	IGF2BP3	protein	10643	Homo sapiens	CLIP-seq	starBase	None	0.5483
RAID01607760	hsa-miR-4519	miRNA	MIMAT0019056	Homo sapiens	UPF1	protein	5976	Homo sapiens	CLIP-seq	starBase	None	0.5483
RAID01607961	hsa-mir-124-3	miRNA	MI0000445	Homo sapiens	FUS	protein	2521	Homo sapiens	CLIP-seq	starBase	None	0.5483
RAID01609631	mmu-mir-3082	miRNA	MI0014045	Mus musculus	Tardbp	protein	230908	Mus musculus	CLIP-seq	starBase	None	0.5483
RAID01611483	hsa-miR-423-3p	miRNA	MIMAT0001340	Homo sapiens	SRSF1	protein	6426	Homo sapiens	CLIP-seq	starBase	None	0.5483
RAID01612554	hsa-miR-1587	miRNA	MIMAT0019077	Homo sapiens	FUS	protein	2521	Homo sapiens	CLIP-seq	starBase	None	0.5483
RAID01613794	hsa-miR-641	miRNA	MIMAT0003311	Homo sapiens	EIF4A3	protein	9775	Homo sapiens	CLIP-seq	starBase	None	0.5483
RAID01614982	hsa-miR-190a-5p	miRNA	MIMAT0000458	Homo sapiens	FUS	protein	2521	Homo sapiens	CLIP-seq	starBase	None	0.5483
RAID01617793	hsa-mir-3198-2	miRNA	MI0017335	Homo sapiens	IGF2BP2	protein	10644	Homo sapiens	CLIP-seq	starBase	None	0.5483
RAID01620130	hsa-mir-181a-1	miRNA	MI0000289	Homo sapiens	DGCR8	protein	54487	Homo sapiens	CLIP-seq	starBase	None	0.5483
RAID01624260	hsa-miR-448	miRNA	MIMAT0001532	Homo sapiens	FUS	protein	2521	Homo sapiens	CLIP-seq	starBase	None	0.5483
RAID01626378	hsa-miR-877-5p	miRNA	MIMAT0004949	Homo sapiens	LIN28B	protein	389421	Homo sapiens	CLIP-seq	starBase	None	0.5483
RAID01626828	hsa-miR-532-5p	miRNA	MIMAT0002888	Homo sapiens	FMR1	protein	2332	Homo sapiens	CLIP-seq	starBase	None	0.5483
RAID01629107	mmu-miR-540-3p	miRNA	MIMAT0003167	Mus musculus	Fus	protein	233908	Mus musculus	CLIP-seq	starBase	None	0.5483
RAID01630349	mmu-miR-673-5p	miRNA	MIMAT0003739	Mus musculus	Fus	protein	233908	Mus musculus	CLIP-seq	starBase	None	0.5483
RAID01631449	hsa-miR-424-5p	miRNA	MIMAT0001341	Homo sapiens	LIN28B	protein	389421	Homo sapiens	CLIP-seq	starBase	None	0.5483
RAID01631889	mmu-miR-25-3p	miRNA	MIMAT0000652	Mus musculus	Fus	protein	233908	Mus musculus	CLIP-seq	starBase	None	0.5483
RAID01634029	hsa-mir-4446	miRNA	MI0016789	Homo sapiens	QKI	protein	9444	Homo sapiens	CLIP-seq	starBase	None	0.5483
RAID01634660	hsa-miR-505-3p	miRNA	MIMAT0002876	Homo sapiens	FXR1	protein	8087	Homo sapiens	CLIP-seq	starBase	None	0.5483
RAID01636411	hsa-miR-4705	miRNA	MIMAT0019805	Homo sapiens	FUS	protein	2521	Homo sapiens	CLIP-seq	starBase	None	0.5483
RAID01636425	hsa-miR-429	miRNA	MIMAT0001536	Homo sapiens	LIN28A	protein	79727	Homo sapiens	CLIP-seq	starBase	None	0.5483
RAID01637346	hsa-miR-412-3p	miRNA	MIMAT0002170	Homo sapiens	LIN28A	protein	79727	Homo sapiens	CLIP-seq	starBase	None	0.5483
RAID01640768	hsa-mir-29b-1	miRNA	MI0000105	Homo sapiens	EIF4A3	protein	9775	Homo sapiens	CLIP-seq	starBase	None	0.5483
RAID01642854	hsa-let-7g-5p	miRNA	MIMAT0000414	Homo sapiens	FUS	protein	2521	Homo sapiens	CLIP-seq	starBase	None	0.5483
RAID01645399	mmu-miR-421-3p	miRNA	MIMAT0004869	Mus musculus	Fus	protein	233908	Mus musculus	CLIP-seq	starBase	None	0.5483
RAID01649161	hsa-miR-424-5p	miRNA	MIMAT0001341	Homo sapiens	DGCR8	protein	54487	Homo sapiens	CLIP-seq	starBase	None	0.5483
RAID01652097	hsa-miR-29b-3p	miRNA	MIMAT0000100	Homo sapiens	HNRNPA1	protein	3178	Homo sapiens	IP (immunoprecipitation)//RT-PCR	RAID	26494299	0.8808
RAID01653344	mmu-let-7a-2	miRNA	MI0000557	Mus musculus	Fus	protein	233908	Mus musculus	CLIP-seq	starBase	None	0.5483
RAID01654055	hsa-miR-197-3p	miRNA	MIMAT0000227	Homo sapiens	FUS	protein	2521	Homo sapiens	CLIP-seq	starBase	None	0.5483
RAID01658886	hsa-mir-1233-2	miRNA	MI0015973	Homo sapiens	EIF4A3	protein	9775	Homo sapiens	CLIP-seq	starBase	None	0.5483
RAID01661346	hsa-miR-26a-5p	miRNA	MIMAT0000082	Homo sapiens	SMAD1	protein	4086	Homo sapiens	Western Blot//Reporter Assay	RAID	18197755	0.8808
RAID01663834	hsa-miR-30d-5p	miRNA	MIMAT0000245	Homo sapiens	HSPA5	protein	3309	Homo sapiens	Reporter Assay//RT-PCR//Western Blot	RAID	23085757	0.9526
RAID01673159	hsa-miR-95-3p	miRNA	MIMAT0000094	Homo sapiens	PTBP1	protein	5725	Homo sapiens	CLIP-seq	starBase	None	0.5483
RAID01674041	hsa-miR-182-5p	miRNA	MIMAT0000259	Homo sapiens	LIN28A	protein	79727	Homo sapiens	CLIP-seq//CLIP	NPInter//starBase	22959275	0.6606
RAID01676970	hsa-miR-4498	miRNA	MIMAT0019033	Homo sapiens	U2AF2	protein	11338	Homo sapiens	CLIP-seq	starBase	None	0.5483
RAID01677242	hsa-miR-199a-5p	miRNA	MIMAT0000231	Homo sapiens	HSPA5	protein	3309	Homo sapiens	Reporter Assay//RT-PCR//Western Blot	RAID	23085757	0.9526
RAID01679558	hsa-miR-21-5p	miRNA	MIMAT0000076	Homo sapiens	TIAL1	protein	7073	Homo sapiens	CLIP-seq	starBase	None	0.5483
RAID01680348	hsa-miR-204-5p	miRNA	MIMAT0000265	Homo sapiens	FUS	protein	2521	Homo sapiens	CLIP-seq	starBase	None	0.5483
RAID01681899	hsa-let-7b-5p	miRNA	MIMAT0000063	Homo sapiens	EIF4A3	protein	9775	Homo sapiens	CLIP-seq	starBase	None	0.5483
RAID01682381	hsa-miR-3941	miRNA	MIMAT0018357	Homo sapiens	EIF4A3	protein	9775	Homo sapiens	CLIP-seq	starBase	None	0.5483
RAID01682545	hsa-miR-454-3p	miRNA	MIMAT0003885	Homo sapiens	EIF4A3	protein	9775	Homo sapiens	CLIP-seq	starBase	None	0.5483
RAID01682940	hsa-miR-598-3p	miRNA	MIMAT0003266	Homo sapiens	FMR1	protein	2332	Homo sapiens	CLIP-seq	starBase	None	0.5483
RAID01686909	hsa-miR-3916	miRNA	MIMAT0018190	Homo sapiens	SRSF1	protein	6426	Homo sapiens	CLIP-seq	starBase	None	0.5483
RAID01690326	hsa-miR-3940-3p	miRNA	MIMAT0018356	Homo sapiens	UPF1	protein	5976	Homo sapiens	CLIP-seq	starBase	None	0.5483
RAID01691446	hsa-miR-10a-5p	miRNA	MIMAT0000253	Homo sapiens	LIN28B	protein	389421	Homo sapiens	CLIP-seq	starBase	None	0.5483
RAID01691542	hsa-miR-2355-5p	miRNA	MIMAT0016895	Homo sapiens	LIN28B	protein	389421	Homo sapiens	CLIP-seq	starBase	None	0.5483
RAID01691637	hsa-miR-9-5p	miRNA	MIMAT0000441	Homo sapiens	MMP2	protein	4313	Homo sapiens	Western Blot//CLIP-seq	NPInter	24038734	0.8785
RAID01691720	mmu-miR-27a-3p	miRNA	MIMAT0000537	Mus musculus	Fus	protein	233908	Mus musculus	CLIP-seq	starBase	None	0.5483
RAID01694543	hsa-miR-3615	miRNA	MIMAT0017994	Homo sapiens	FMR1	protein	2332	Homo sapiens	CLIP-seq	starBase	None	0.5483
RAID01695080	hsa-let-7a-1	miRNA	MI0000060	Homo sapiens	DGCR8	protein	54487	Homo sapiens	CLIP-seq	starBase	None	0.5483
RAID01700424	hsa-miR-193b-3p	miRNA	MIMAT0002819	Homo sapiens	FUS	protein	2521	Homo sapiens	CLIP-seq	starBase	None	0.5483
RAID01704251	mmu-miR-1224-5p	miRNA	MIMAT0005460	Mus musculus	Fus	protein	233908	Mus musculus	CLIP-seq	starBase	None	0.5483
RAID01705528	mmu-mir-1839	miRNA	MI0009991	Mus musculus	Fus	protein	233908	Mus musculus	CLIP-seq	starBase	None	0.5483
RAID01706348	hsa-miR-4292	miRNA	MIMAT0016919	Homo sapiens	EIF4A3	protein	9775	Homo sapiens	CLIP-seq	starBase	None	0.5483
RAID01707155	hsa-miR-99b-5p	miRNA	MIMAT0000689	Homo sapiens	LIN28A	protein	79727	Homo sapiens	CLIP-seq	starBase	None	0.5483
RAID01708680	hsa-mir-499a	miRNA	MI0003183	Homo sapiens	FUS	protein	2521	Homo sapiens	CLIP-seq	starBase	None	0.5483
RAID01709807	hsa-miR-362-5p	miRNA	MIMAT0000705	Homo sapiens	DGCR8	protein	54487	Homo sapiens	CLIP-seq	starBase	None	0.5483
RAID01711016	hsa-miR-3188	miRNA	MIMAT0015070	Homo sapiens	EIF4A3	protein	9775	Homo sapiens	CLIP-seq	starBase	None	0.5483
RAID01715491	hsa-miR-3942-5p	miRNA	MIMAT0018358	Homo sapiens	DGCR8	protein	54487	Homo sapiens	CLIP-seq	starBase	None	0.5483
RAID01716288	hsa-miR-374a-5p	miRNA	MIMAT0000727	Homo sapiens	EIF4A3	protein	9775	Homo sapiens	CLIP-seq	starBase	None	0.5483
RAID01716479	hsa-mir-3064	miRNA	MI0017375	Homo sapiens	IGF2BP3	protein	10643	Homo sapiens	CLIP-seq	starBase	None	0.5483
RAID01717414	hsa-miR-17-5p	miRNA	MIMAT0000070	Homo sapiens	ZC3H7B	protein	23264	Homo sapiens	CLIP-seq	starBase	None	0.5483
RAID01724052	hsa-miR-326	miRNA	MIMAT0000756	Homo sapiens	EIF4A3	protein	9775	Homo sapiens	CLIP-seq	starBase	None	0.5483
RAID01724883	mmu-miR-127-3p	miRNA	MIMAT0000139	Mus musculus	Fus	protein	233908	Mus musculus	CLIP-seq	starBase	None	0.5483
RAID01725867	mmu-miR-137-3p	miRNA	MIMAT0000149	Mus musculus	Ptbp2	protein	56195	Mus musculus	CLIP-seq	starBase	None	0.5483
RAID01729007	hsa-miR-25-3p	miRNA	MIMAT0000081	Homo sapiens	FUS	protein	2521	Homo sapiens	CLIP-seq	starBase	None	0.5483
RAID01729879	hsa-miR-21-5p	miRNA	MIMAT0000076	Homo sapiens	AGO2	protein	27161	Homo sapiens	Northern Blot//IP (immunoprecipitation)	RAID	22844086	0.8808
RAID01731010	hsa-mir-4690	miRNA	MI0017323	Homo sapiens	U2AF2	protein	11338	Homo sapiens	CLIP-seq	starBase	None	0.5483
RAID01731940	hsa-miR-193b-3p	miRNA	MIMAT0002819	Homo sapiens	DGCR8	protein	54487	Homo sapiens	CLIP-seq	starBase	None	0.5483
RAID01738656	hsa-mir-3180-4	miRNA	MI0016408	Homo sapiens	FUS	protein	2521	Homo sapiens	CLIP-seq	starBase	None	0.5483
RAID01739274	hsa-miR-1294	miRNA	MIMAT0005884	Homo sapiens	HNRNPC	protein	3183	Homo sapiens	CLIP-seq	starBase	None	0.5483
RAID01741096	hsa-mir-3158-1	miRNA	MI0014186	Homo sapiens	DGCR8	protein	54487	Homo sapiens	CLIP-seq	starBase	None	0.5483
RAID01743149	hsa-let-7c-5p	miRNA	MIMAT0000064	Homo sapiens	EIF4A3	protein	9775	Homo sapiens	CLIP-seq	starBase	None	0.5483
RAID01743296	hsa-miR-579-3p	miRNA	MIMAT0003244	Homo sapiens	TIAL1	protein	7073	Homo sapiens	RIP (RNA Immunoprecipitation)//Western Blot//Reporter Assay//RT-PCR	RAID	20435889	0.982
RAID01743531	hsa-mir-340	miRNA	MI0000802	Homo sapiens	LIN28B	protein	389421	Homo sapiens	CLIP-seq	starBase	None	0.5483
RAID01743958	hsa-miR-5696	miRNA	MIMAT0022489	Homo sapiens	DGCR8	protein	54487	Homo sapiens	CLIP-seq	starBase	None	0.5483
RAID01749910	hsa-miR-19a-3p	miRNA	MIMAT0000073	Homo sapiens	MOV10	protein	4343	Homo sapiens	CLIP-seq	starBase	None	0.5483
RAID01750389	hsa-miR-130a-3p	miRNA	MIMAT0000425	Homo sapiens	PTBP1	protein	5725	Homo sapiens	CLIP-seq	starBase	None	0.5483
RAID01750688	hsa-miR-551b-3p	miRNA	MIMAT0003233	Homo sapiens	DGCR8	protein	54487	Homo sapiens	CLIP-seq	starBase	None	0.5483
RAID01753076	mmu-mir-669a-9	miRNA	MI0014068	Mus musculus	Fus	protein	233908	Mus musculus	CLIP-seq	starBase	None	0.5483
RAID01755524	hsa-miR-4751	miRNA	MIMAT0019888	Homo sapiens	IGF2BP1	protein	10642	Homo sapiens	CLIP-seq	starBase	None	0.5483
RAID01756122	mmu-miR-381-3p	miRNA	MIMAT0000746	Mus musculus	Fus	protein	233908	Mus musculus	CLIP-seq	starBase	None	0.5483
RAID01756413	hsa-miR-944	miRNA	MIMAT0004987	Homo sapiens	LIN28B	protein	389421	Homo sapiens	CLIP-seq	starBase	None	0.5483
RAID01758704	hsa-miR-663a	miRNA	MIMAT0003326	Homo sapiens	EIF4A3	protein	9775	Homo sapiens	CLIP-seq	starBase	None	0.5483
RAID01759988	hsa-mir-324	miRNA	MI0000813	Homo sapiens	FMR1	protein	2332	Homo sapiens	CLIP-seq	starBase	None	0.5483
RAID01760063	hsa-miR-5703	miRNA	MIMAT0022496	Homo sapiens	U2AF2	protein	11338	Homo sapiens	CLIP-seq	starBase	None	0.5483
RAID01761197	mmu-mir-1839	miRNA	MI0009991	Mus musculus	Srsf1	protein	110809	Mus musculus	CLIP-seq	starBase	None	0.5483
RAID01761245	hsa-mir-5006	miRNA	MI0017873	Homo sapiens	EIF4A3	protein	9775	Homo sapiens	CLIP-seq	starBase	None	0.5483
RAID01761606	mmu-mir-344-1	miRNA	MI0000630	Mus musculus	Fus	protein	233908	Mus musculus	CLIP-seq	starBase	None	0.5483
RAID01762591	hsa-mir-2467	miRNA	MI0017432	Homo sapiens	EIF4A3	protein	9775	Homo sapiens	CLIP-seq	starBase	None	0.5483
RAID01763982	mmu-miR-615-3p	miRNA	MIMAT0003783	Mus musculus	Fus	protein	233908	Mus musculus	CLIP-seq	starBase	None	0.5483
RAID01764451	hsa-miR-196b-5p	miRNA	MIMAT0001080	Homo sapiens	PTBP1	protein	5725	Homo sapiens	CLIP-seq	starBase	None	0.5483
RAID01770626	hsa-miR-4743-5p	miRNA	MIMAT0019874	Homo sapiens	U2AF2	protein	11338	Homo sapiens	CLIP-seq	starBase	None	0.5483
RAID01771745	hsa-miR-10b-5p	miRNA	MIMAT0000254	Homo sapiens	NCBP3	protein	55421	Homo sapiens	CLIP-seq	starBase	None	0.5483
RAID01771753	hsa-miR-26b-5p	miRNA	MIMAT0000083	Homo sapiens	FMR1	protein	2332	Homo sapiens	CLIP-seq	starBase	None	0.5483
RAID01772517	hsa-mir-101-2	miRNA	MI0000739	Homo sapiens	EIF4A3	protein	9775	Homo sapiens	CLIP-seq	starBase	None	0.5483
RAID01772917	hsa-miR-1301-3p	miRNA	MIMAT0005797	Homo sapiens	FXR1	protein	8087	Homo sapiens	CLIP-seq	starBase	None	0.5483
RAID01772999	hsa-miR-5088-5p	miRNA	MIMAT0021080	Homo sapiens	EIF4A3	protein	9775	Homo sapiens	CLIP-seq	starBase	None	0.5483
RAID01773099	hsa-miR-671-5p	miRNA	MIMAT0003880	Homo sapiens	DGCR8	protein	54487	Homo sapiens	CLIP-seq	starBase	None	0.5483
RAID01773518	hsa-mir-629	miRNA	MI0003643	Homo sapiens	FUS	protein	2521	Homo sapiens	CLIP-seq	starBase	None	0.5483
RAID01773797	hsa-mir-9-3	miRNA	MI0000468	Homo sapiens	DGCR8	protein	54487	Homo sapiens	CLIP-seq	starBase	None	0.5483
RAID01778448	hsa-miR-6080	miRNA	MIMAT0023705	Homo sapiens	DGCR8	protein	54487	Homo sapiens	CLIP-seq	starBase	None	0.5483
RAID01778572	hsa-miR-5047	miRNA	MIMAT0020541	Homo sapiens	U2AF2	protein	11338	Homo sapiens	CLIP-seq	starBase	None	0.5483
RAID01780568	hsa-miR-636	miRNA	MIMAT0003306	Homo sapiens	ELAVL1	protein	1994	Homo sapiens	CLIP-seq	starBase	None	0.5483
RAID01781629	hsa-miR-99a-5p	miRNA	MIMAT0000097	Homo sapiens	DGCR8	protein	54487	Homo sapiens	CLIP-seq	starBase	None	0.5483
RAID01784428	hsa-let-7c-5p	miRNA	MIMAT0000064	Homo sapiens	IGF2BP1	protein	10642	Homo sapiens	RIP (RNA Immunoprecipitation)//PAR-CLIP	RAID	23069990	0.8785
RAID01785421	hsa-miR-4281	miRNA	MIMAT0016907	Homo sapiens	EIF4A3	protein	9775	Homo sapiens	CLIP-seq	starBase	None	0.5483
RAID01786834	hsa-mir-4763	miRNA	MI0017404	Homo sapiens	QKI	protein	9444	Homo sapiens	CLIP-seq	starBase	None	0.5483
RAID01790896	mmu-mir-425	miRNA	MI0001447	Mus musculus	Cirbp	protein	12696	Mus musculus	CLIP-seq	starBase	None	0.5483
RAID01791273	hsa-miR-23a-3p	miRNA	MIMAT0000078	Homo sapiens	FMR1	protein	2332	Homo sapiens	CLIP-seq	starBase	None	0.5483
RAID01792311	hsa-miR-320a	miRNA	MIMAT0000510	Homo sapiens	EIF4A3	protein	9775	Homo sapiens	CLIP-seq	starBase	None	0.5483
RAID01792847	hsa-miR-1306-5p	miRNA	MIMAT0022726	Homo sapiens	LIN28A	protein	79727	Homo sapiens	CLIP	NPInter	22959275	0.5483
RAID01794706	mmu-miR-34b-5p	miRNA	MIMAT0000382	Mus musculus	Fus	protein	233908	Mus musculus	CLIP-seq	starBase	None	0.5483
RAID01796221	hsa-mir-4761	miRNA	MI0017402	Homo sapiens	IGF2BP1	protein	10642	Homo sapiens	CLIP-seq	starBase	None	0.5483
RAID01798980	mmu-miR-3475-3p	miRNA	MIMAT0015219	Mus musculus	Fus	protein	233908	Mus musculus	CLIP-seq	starBase	None	0.5483
RAID01802610	mmu-mir-26a-2	miRNA	MI0000706	Mus musculus	Fus	protein	233908	Mus musculus	CLIP-seq	starBase	None	0.5483
RAID01802751	hsa-miR-632	miRNA	MIMAT0003302	Homo sapiens	FMR1	protein	2332	Homo sapiens	CLIP-seq	starBase	None	0.5483
RAID01803132	hsa-miR-744-5p	miRNA	MIMAT0004945	Homo sapiens	DGCR8	protein	54487	Homo sapiens	CLIP-seq	starBase	None	0.5483
RAID01803135	hsa-mir-4712	miRNA	MI0017346	Homo sapiens	EIF4A3	protein	9775	Homo sapiens	CLIP-seq	starBase	None	0.5483
RAID01810708	mmu-let-7d-5p	miRNA	MIMAT0000383	Mus musculus	Lin28b	protein	380669	Mus musculus	RT-PCR	RAID	23811688	0.7311
RAID01813483	hsa-miR-183-5p	miRNA	MIMAT0000261	Homo sapiens	DGCR8	protein	54487	Homo sapiens	CLIP-seq	starBase	None	0.5483
RAID01813876	mmu-miR-200c-3p	miRNA	MIMAT0000657	Mus musculus	Rbm3	protein	19652	Mus musculus	CLIP-seq	starBase	None	0.5483
RAID01816050	hsa-let-7d-5p	miRNA	MIMAT0000065	Homo sapiens	EIF4A3	protein	9775	Homo sapiens	CLIP-seq	starBase	None	0.5483
RAID01818992	hsa-miR-3671	miRNA	MIMAT0018094	Homo sapiens	EIF4A3	protein	9775	Homo sapiens	CLIP-seq	starBase	None	0.5483
RAID01821573	hsa-mir-4763	miRNA	MI0017404	Homo sapiens	FUS	protein	2521	Homo sapiens	CLIP-seq	starBase	None	0.5483
RAID01822395	hsa-miR-222-3p	miRNA	MIMAT0000279	Homo sapiens	RTCB	protein	51493	Homo sapiens	CLIP-seq	starBase	None	0.5483
RAID01825353	hsa-miR-3691-5p	miRNA	MIMAT0018120	Homo sapiens	TNRC6A	protein	27327	Homo sapiens	CLIP-seq	starBase	None	0.5483
RAID01827166	hsa-mir-4707	miRNA	MI0017340	Homo sapiens	EIF4A3	protein	9775	Homo sapiens	CLIP-seq	starBase	None	0.5483
RAID01827717	mmu-miR-10a-5p	miRNA	MIMAT0000648	Mus musculus	Fus	protein	233908	Mus musculus	CLIP-seq	starBase	None	0.5483
RAID01830483	hsa-mir-4732	miRNA	MI0017369	Homo sapiens	LIN28A	protein	79727	Homo sapiens	CLIP-seq	starBase	None	0.5483
RAID01831786	ath-MIR172d	miRNA	MI0000992	Arabidopsis thaliana	FCA	protein	827323	Arabidopsis thaliana	RIP (RNA Immunoprecipitation)//EMSA (electrophoretic mobility shift assay)//RT-PCR//Pull down Assay	RAID	22431732	0.982
RAID01832222	mmu-miR-1197-3p	miRNA	MIMAT0005858	Mus musculus	Fus	protein	233908	Mus musculus	CLIP-seq	starBase	None	0.5483
RAID01832852	hsa-mir-4709	miRNA	MI0017342	Homo sapiens	UPF1	protein	5976	Homo sapiens	CLIP-seq	starBase	None	0.5483
RAID01833508	hsa-miR-337-3p	miRNA	MIMAT0000754	Homo sapiens	FUS	protein	2521	Homo sapiens	CLIP-seq	starBase	None	0.5483
RAID01839243	hsa-mir-4800	miRNA	MI0017448	Homo sapiens	FMR1	protein	2332	Homo sapiens	CLIP-seq	starBase	None	0.5483
RAID01839282	hsa-miR-30b-5p	miRNA	MIMAT0000420	Homo sapiens	FMR1	protein	2332	Homo sapiens	CLIP-seq	starBase	None	0.5483
RAID01840666	hsa-miR-374b-5p	miRNA	MIMAT0004955	Homo sapiens	EIF4A3	protein	9775	Homo sapiens	CLIP-seq	starBase	None	0.5483
RAID01840701	hsa-mir-138-2	miRNA	MI0000455	Homo sapiens	FUS	protein	2521	Homo sapiens	CLIP-seq	starBase	None	0.5483
RAID01842911	hsa-mir-1233-1	miRNA	MI0006323	Homo sapiens	EIF4A3	protein	9775	Homo sapiens	CLIP-seq	starBase	None	0.5483
RAID01850183	hsa-miR-20a-5p	miRNA	MIMAT0000075	Homo sapiens	DGCR8	protein	54487	Homo sapiens	CLIP-seq	starBase	None	0.5483
RAID01850494	hsa-mir-4745	miRNA	MI0017384	Homo sapiens	EIF4A3	protein	9775	Homo sapiens	CLIP-seq	starBase	None	0.5483
RAID01851564	hsa-miR-766-3p	miRNA	MIMAT0003888	Homo sapiens	DGCR8	protein	54487	Homo sapiens	CLIP-seq	starBase	None	0.5483
RAID01854701	hsa-miR-3657	miRNA	MIMAT0018077	Homo sapiens	HNRNPC	protein	3183	Homo sapiens	CLIP-seq	starBase	None	0.5483
RAID01857636	hsa-miR-143-3p	miRNA	MIMAT0000435	Homo sapiens	FUS	protein	2521	Homo sapiens	CLIP-seq	starBase	None	0.5483
RAID01861662	hsa-miR-137	miRNA	MIMAT0000429	Homo sapiens	FUS	protein	2521	Homo sapiens	CLIP-seq	starBase	None	0.5483
RAID01862774	hsa-mir-5001	miRNA	MI0017867	Homo sapiens	EIF4A3	protein	9775	Homo sapiens	CLIP-seq	starBase	None	0.5483
RAID01863976	hsa-miR-331-3p	miRNA	MIMAT0000760	Homo sapiens	FUS	protein	2521	Homo sapiens	CLIP-seq	starBase	None	0.5483
RAID01864929	hsa-miR-15b-5p	miRNA	MIMAT0000417	Homo sapiens	FMR1	protein	2332	Homo sapiens	CLIP-seq	starBase	None	0.5483
RAID01865673	hsa-miR-5047	miRNA	MIMAT0020541	Homo sapiens	FMR1	protein	2332	Homo sapiens	CLIP-seq	starBase	None	0.5483
RAID01867147	hsa-miR-200b-3p	miRNA	MIMAT0000318	Homo sapiens	LIN28A	protein	79727	Homo sapiens	CLIP-seq	starBase	None	0.5483
RAID01868799	hsa-mir-19b-2	miRNA	MI0000075	Homo sapiens	PTBP1	protein	5725	Homo sapiens	CLIP-seq	starBase	None	0.5483
RAID01869750	gga-let-7b	miRNA	MIMAT0001102	Gallus gallus	LIN28B	protein	421786	Gallus gallus	RT-PCR	RAID	22995917	0.7311
RAID01872164	hsa-miR-1909-3p	miRNA	MIMAT0007883	Homo sapiens	FUS	protein	2521	Homo sapiens	CLIP-seq	starBase	None	0.5483
RAID01872198	hsa-miR-641	miRNA	MIMAT0003311	Homo sapiens	DGCR8	protein	54487	Homo sapiens	CLIP-seq	starBase	None	0.5483
RAID01873995	hsa-miR-3197	miRNA	MIMAT0015082	Homo sapiens	EIF4A3	protein	9775	Homo sapiens	CLIP-seq	starBase	None	0.5483
RAID01874009	hsa-miR-30a-5p	miRNA	MIMAT0000087	Homo sapiens	CBX3	protein	11335	Homo sapiens	Western Blot//Reporter Assay//RT-PCR	RAID	26333808	0.9526
RAID01875135	hsa-miR-27b-3p	miRNA	MIMAT0000419	Homo sapiens	FUS	protein	2521	Homo sapiens	CLIP-seq	starBase	None	0.5483
RAID01877077	hsa-mir-6723	miRNA	MI0022558	Homo sapiens	ZC3H7B	protein	23264	Homo sapiens	CLIP-seq	starBase	None	0.5483
RAID01877750	mmu-miR-183-5p	miRNA	MIMAT0000212	Mus musculus	Fus	protein	233908	Mus musculus	CLIP-seq	starBase	None	0.5483
RAID01878187	mmu-miR-5125	miRNA	MIMAT0020635	Mus musculus	Srsf1	protein	110809	Mus musculus	CLIP-seq	starBase	None	0.5483
RAID01882591	hsa-mir-181b-1	miRNA	MI0000270	Homo sapiens	DGCR8	protein	54487	Homo sapiens	CLIP-seq	starBase	None	0.5483
RAID01884918	hsa-miR-621	miRNA	MIMAT0003290	Homo sapiens	FMR1	protein	2332	Homo sapiens	CLIP-seq	starBase	None	0.5483
RAID01885754	hsa-miR-30b-5p	miRNA	MIMAT0000420	Homo sapiens	FUS	protein	2521	Homo sapiens	CLIP-seq	starBase	None	0.5483
RAID01885975	mmu-mir-16-2	miRNA	MI0000566	Mus musculus	Ptbp2	protein	56195	Mus musculus	CLIP-seq	starBase	None	0.5483
RAID01886788	hsa-miR-4648	miRNA	MIMAT0019710	Homo sapiens	U2AF2	protein	11338	Homo sapiens	CLIP-seq	starBase	None	0.5483
RAID01888086	hsa-miR-186-3p	miRNA	MIMAT0004612	Homo sapiens	LIN28A	protein	79727	Homo sapiens	CLIP	NPInter	22959275	0.5483
RAID01889871	hsa-miR-489-3p	miRNA	MIMAT0002805	Homo sapiens	DGCR8	protein	54487	Homo sapiens	CLIP-seq	starBase	None	0.5483
RAID01890192	hsa-miR-205-5p	miRNA	MIMAT0000266	Homo sapiens	NCBP3	protein	55421	Homo sapiens	CLIP-seq	starBase	None	0.5483
RAID01890571	hsa-miR-598-3p	miRNA	MIMAT0003266	Homo sapiens	LIN28A	protein	79727	Homo sapiens	CLIP-seq//CLIP	NPInter//starBase	22959275	0.6606
RAID01891131	hsa-miR-146b-5p	miRNA	MIMAT0002809	Homo sapiens	EIF4A3	protein	9775	Homo sapiens	CLIP-seq	starBase	None	0.5483
RAID01893769	hsa-mir-196a-2	miRNA	MI0000279	Homo sapiens	LIN28A	protein	79727	Homo sapiens	CLIP-seq	starBase	None	0.5483
RAID01894619	mmu-mir-181b-1	miRNA	MI0000723	Mus musculus	Ptbp2	protein	56195	Mus musculus	CLIP-seq	starBase	None	0.5483
RAID01895555	hsa-miR-17-5p	miRNA	MIMAT0000070	Homo sapiens	LIN28A	protein	79727	Homo sapiens	CLIP-seq	starBase	None	0.5483
RAID01896278	hsa-miR-424-5p	miRNA	MIMAT0001341	Homo sapiens	LIN28A	protein	79727	Homo sapiens	CLIP-seq	starBase	None	0.5483
RAID01896377	hsa-let-7e-5p	miRNA	MIMAT0000066	Homo sapiens	EIF4A3	protein	9775	Homo sapiens	CLIP-seq	starBase	None	0.5483
RAID01897137	hsa-mir-1302-2	miRNA	MI0006363	Homo sapiens	FUS	protein	2521	Homo sapiens	CLIP-seq	starBase	None	0.5483
RAID01897955	hsa-miR-191-5p	miRNA	MIMAT0000440	Homo sapiens	FXR1	protein	8087	Homo sapiens	CLIP-seq	starBase	None	0.5483
RAID01899484	hsa-mir-769	miRNA	MI0003834	Homo sapiens	FUS	protein	2521	Homo sapiens	CLIP-seq	starBase	None	0.5483
RAID01900198	hsa-miR-2355-5p	miRNA	MIMAT0016895	Homo sapiens	DGCR8	protein	54487	Homo sapiens	CLIP-seq	starBase	None	0.5483
RAID01901960	hsa-miR-143-3p	miRNA	MIMAT0000435	Homo sapiens	EIF4A3	protein	9775	Homo sapiens	CLIP-seq	starBase	None	0.5483
RAID01902916	hsa-mir-4712	miRNA	MI0017346	Homo sapiens	IGF2BP3	protein	10643	Homo sapiens	CLIP-seq	starBase	None	0.5483
RAID01909001	hsa-miR-454-3p	miRNA	MIMAT0003885	Homo sapiens	DGCR8	protein	54487	Homo sapiens	CLIP-seq	starBase	None	0.5483
RAID01909102	hsa-let-7g-5p	miRNA	MIMAT0000414	Homo sapiens	EIF4A3	protein	9775	Homo sapiens	CLIP-seq	starBase	None	0.5483
RAID01909488	hsa-miR-1306-3p	miRNA	MIMAT0005950	Homo sapiens	ELAVL1	protein	1994	Homo sapiens	CLIP-seq	starBase	None	0.5483
RAID01914106	hsa-miR-193a-3p	miRNA	MIMAT0000459	Homo sapiens	LIN28B	protein	389421	Homo sapiens	CLIP-seq	starBase	None	0.5483
RAID01915540	hsa-miR-132-3p	miRNA	MIMAT0000426	Homo sapiens	DGCR8	protein	54487	Homo sapiens	CLIP-seq	starBase	None	0.5483
RAID01916698	hsa-let-7g-5p	miRNA	MIMAT0000414	Homo sapiens	LIN28B	protein	389421	Homo sapiens	Reporter Assay//IP (immunoprecipitation)//EMSA (electrophoretic mobility shift assay)//Western Blot//RT-PCR//CLIP-seq	NPInter//starBase//RAID	23063642//26440890//20525879//18951094	0.997
RAID01922740	hsa-mir-19b-2	miRNA	MI0000075	Homo sapiens	DGCR8	protein	54487	Homo sapiens	CLIP-seq	starBase	None	0.5483
RAID01922860	hsa-miR-378c	miRNA	MIMAT0016847	Homo sapiens	DGCR8	protein	54487	Homo sapiens	CLIP-seq	starBase	None	0.5483
RAID01923769	hsa-mir-1224	miRNA	MI0003764	Homo sapiens	DGCR8	protein	54487	Homo sapiens	CLIP-seq	starBase	None	0.5483
RAID01924832	mmu-mir-221	miRNA	MI0000709	Mus musculus	Adarb1	protein	110532	Mus musculus	RT-PCR//Northern Blot	RAID	25582055	0.8808
RAID01926333	hsa-miR-614	miRNA	MIMAT0003282	Homo sapiens	IGF2BP3	protein	10643	Homo sapiens	CLIP-seq	starBase	None	0.5483
RAID01926884	hsa-miR-181a-5p	miRNA	MIMAT0000256	Homo sapiens	DUSP5	protein	1847	Homo sapiens	Western Blot//Reporter Assay//RT-PCR	RAID	17382377	0.9526
RAID01927292	hsa-miR-1269a	miRNA	MIMAT0005923	Homo sapiens	DGCR8	protein	54487	Homo sapiens	CLIP-seq	starBase	None	0.5483
RAID01928252	hsa-miR-5194	miRNA	MIMAT0021125	Homo sapiens	HNRNPC	protein	3183	Homo sapiens	CLIP-seq	starBase	None	0.5483
RAID01928521	mmu-miR-23a-3p	miRNA	MIMAT0000532	Mus musculus	Celf1	protein	13046	Mus musculus	Western Blot//Northern Blot//Reporter Assay//RT-PCR	RAID	20299448	0.982
RAID01930643	hsa-miR-15b-5p	miRNA	MIMAT0000417	Homo sapiens	LIN28A	protein	79727	Homo sapiens	CLIP-seq	starBase	None	0.5483
RAID01932100	hsa-miR-648	miRNA	MIMAT0003318	Homo sapiens	EIF4A3	protein	9775	Homo sapiens	CLIP-seq	starBase	None	0.5483
RAID01933358	hsa-let-7b-5p	miRNA	MIMAT0000063	Homo sapiens	DGCR8	protein	54487	Homo sapiens	CLIP-seq	starBase	None	0.5483
RAID01933716	hsa-miR-148b-3p	miRNA	MIMAT0000759	Homo sapiens	FUS	protein	2521	Homo sapiens	CLIP-seq	starBase	None	0.5483
RAID01935323	hsa-miR-125b-5p	miRNA	MIMAT0000423	Homo sapiens	NTRK3	protein	4916	Homo sapiens	Western Blot//Reporter Assay//RT-PCR	RAID	17483472	0.9526
RAID01939185	hsa-miR-210-3p	miRNA	MIMAT0000267	Homo sapiens	FUS	protein	2521	Homo sapiens	CLIP-seq	starBase	None	0.5483
RAID01939359	hsa-miR-30a-5p	miRNA	MIMAT0000087	Homo sapiens	LIN28B	protein	389421	Homo sapiens	CLIP-seq	starBase	None	0.5483
RAID01939364	hsa-let-7g	miRNA	MI0000433	Homo sapiens	LIN28B	protein	389421	Homo sapiens	EMSA (electrophoretic mobility shift assay)	RAID	23063642	0.7311
RAID01939443	hsa-miR-762	miRNA	MIMAT0010313	Homo sapiens	FUS	protein	2521	Homo sapiens	CLIP-seq	starBase	None	0.5483
RAID01940611	cel-miR-358-3p	miRNA	MIMAT0000700	Caenorhabditis elegans	flh-1	protein	177749	Caenorhabditis elegans	Yeast two-hybrid analysis	NPInter	18794349	0.7311
RAID01941285	hsa-miR-146a-5p	miRNA	MIMAT0000449	Homo sapiens	ZBTB16	protein	7704	Homo sapiens	RT-PCR//Reporter Assay//Western Blot	RAID	18568019	0.9526
RAID01944044	hsa-miR-381-3p	miRNA	MIMAT0000736	Homo sapiens	FUS	protein	2521	Homo sapiens	CLIP-seq	starBase	None	0.5483
RAID01945067	mmu-miR-23b-3p	miRNA	MIMAT0000125	Mus musculus	Celf2	protein	14007	Mus musculus	Western Blot//Northern Blot//Reporter Assay//RT-PCR	RAID	20299448	0.982
RAID01948999	hsa-mir-3614	miRNA	MI0016004	Homo sapiens	IGF2BP2	protein	10644	Homo sapiens	CLIP-seq	starBase	None	0.5483
RAID01950224	hsa-mir-3648-1	miRNA	MI0016048	Homo sapiens	UPF1	protein	5976	Homo sapiens	CLIP-seq	starBase	None	0.5483
RAID01953463	hsa-mir-542	miRNA	MI0003686	Homo sapiens	LIN28A	protein	79727	Homo sapiens	CLIP-seq	starBase	None	0.5483
RAID01956526	hsa-miR-412-3p	miRNA	MIMAT0002170	Homo sapiens	LIN28B	protein	389421	Homo sapiens	CLIP-seq	starBase	None	0.5483
RAID01957167	ath-miR398b-3p	miRNA	MIMAT0000949	Arabidopsis thaliana	FCA	protein	827323	Arabidopsis thaliana	RIP (RNA Immunoprecipitation)//EMSA (electrophoretic mobility shift assay)//RT-PCR//Pull down Assay	RAID	22431732	0.982
RAID01957590	hsa-miR-4657	miRNA	MIMAT0019724	Homo sapiens	FMR1	protein	2332	Homo sapiens	CLIP-seq	starBase	None	0.5483
RAID01959655	hsa-miR-4254	miRNA	MIMAT0016884	Homo sapiens	TNRC6A	protein	27327	Homo sapiens	CLIP-seq	starBase	None	0.5483
RAID01961808	hsa-miR-29a-3p	miRNA	MIMAT0000086	Homo sapiens	RTCB	protein	51493	Homo sapiens	CLIP-seq	starBase	None	0.5483
RAID01963805	hsa-miR-431-5p	miRNA	MIMAT0001625	Homo sapiens	FUS	protein	2521	Homo sapiens	CLIP-seq	starBase	None	0.5483
RAID01968234	hsa-miR-1281	miRNA	MIMAT0005939	Homo sapiens	LIN28B	protein	389421	Homo sapiens	CLIP-seq	starBase	None	0.5483
RAID01968714	hsa-miR-1909-3p	miRNA	MIMAT0007883	Homo sapiens	FXR2	protein	9513	Homo sapiens	CLIP-seq	starBase	None	0.5483
RAID01969985	hsa-miR-221-3p	miRNA	MIMAT0000278	Homo sapiens	RTCB	protein	51493	Homo sapiens	CLIP-seq	starBase	None	0.5483
RAID01970901	mmu-miR-331-3p	miRNA	MIMAT0000571	Mus musculus	Fus	protein	233908	Mus musculus	CLIP-seq	starBase	None	0.5483
RAID01972637	hsa-miR-1231	miRNA	MIMAT0005586	Homo sapiens	UPF1	protein	5976	Homo sapiens	CLIP-seq	starBase	None	0.5483
RAID01973219	hsa-miR-3619-5p	miRNA	MIMAT0017999	Homo sapiens	TNRC6A	protein	27327	Homo sapiens	CLIP-seq	starBase	None	0.5483
RAID01973432	hsa-mir-4789	miRNA	MI0017436	Homo sapiens	IGF2BP1	protein	10642	Homo sapiens	CLIP-seq	starBase	None	0.5483
RAID01979778	hsa-miR-210-3p	miRNA	MIMAT0000267	Homo sapiens	EIF4A3	protein	9775	Homo sapiens	CLIP-seq	starBase	None	0.5483
RAID01980176	hsa-miR-1910-5p	miRNA	MIMAT0007884	Homo sapiens	EIF4A3	protein	9775	Homo sapiens	CLIP-seq	starBase	None	0.5483
RAID01982555	mmu-miR-99b-5p	miRNA	MIMAT0000132	Mus musculus	Fus	protein	233908	Mus musculus	CLIP-seq	starBase	None	0.5483
RAID01982569	hsa-miR-5047	miRNA	MIMAT0020541	Homo sapiens	HNRNPC	protein	3183	Homo sapiens	CLIP-seq	starBase	None	0.5483
RAID01984215	hsa-mir-196a-2	miRNA	MI0000279	Homo sapiens	LIN28B	protein	389421	Homo sapiens	CLIP-seq	starBase	None	0.5483
RAID01985844	hsa-miR-378f	miRNA	MIMAT0018932	Homo sapiens	DGCR8	protein	54487	Homo sapiens	CLIP-seq	starBase	None	0.5483
RAID01986767	hsa-miR-1825	miRNA	MIMAT0006765	Homo sapiens	FMR1	protein	2332	Homo sapiens	CLIP-seq	starBase	None	0.5483
RAID01989015	hsa-miR-3912-3p	miRNA	MIMAT0018186	Homo sapiens	DGCR8	protein	54487	Homo sapiens	CLIP-seq	starBase	None	0.5483
RAID01989383	hsa-miR-215-5p	miRNA	MIMAT0000272	Homo sapiens	EIF4A3	protein	9775	Homo sapiens	CLIP-seq	starBase	None	0.5483
RAID01989779	mmu-miR-22-3p	miRNA	MIMAT0000531	Mus musculus	Fus	protein	233908	Mus musculus	CLIP-seq	starBase	None	0.5483
RAID01990122	hsa-mir-4761	miRNA	MI0017402	Homo sapiens	U2AF2	protein	11338	Homo sapiens	CLIP-seq	starBase	None	0.5483
RAID01990442	hsa-miR-106b-5p	miRNA	MIMAT0000680	Homo sapiens	FXR1	protein	8087	Homo sapiens	CLIP-seq	starBase	None	0.5483
RAID01993192	hsa-mir-3607	miRNA	MI0015997	Homo sapiens	IGF2BP2	protein	10644	Homo sapiens	CLIP-seq	starBase	None	0.5483
RAID01995067	hsa-miR-5047	miRNA	MIMAT0020541	Homo sapiens	ELAVL1	protein	1994	Homo sapiens	CLIP-seq	starBase	None	0.5483
RAID01995250	hsa-let-7c-5p	miRNA	MIMAT0000064	Homo sapiens	DGCR8	protein	54487	Homo sapiens	CLIP-seq	starBase	None	0.5483
RAID01998088	hsa-miR-93-5p	miRNA	MIMAT0000093	Homo sapiens	FXR1	protein	8087	Homo sapiens	CLIP-seq	starBase	None	0.5483
RAID01998930	hsa-miR-326	miRNA	MIMAT0000756	Homo sapiens	DGCR8	protein	54487	Homo sapiens	CLIP-seq	starBase	None	0.5483
RAID01999504	hsa-miR-3188	miRNA	MIMAT0015070	Homo sapiens	DGCR8	protein	54487	Homo sapiens	CLIP-seq	starBase	None	0.5483
RAID01999629	hsa-miR-632	miRNA	MIMAT0003302	Homo sapiens	U2AF2	protein	11338	Homo sapiens	CLIP-seq	starBase	None	0.5483
RAID02000163	hsa-miR-106b-5p	miRNA	MIMAT0000680	Homo sapiens	ALKBH5	protein	54890	Homo sapiens	CLIP-seq	starBase	None	0.5483
RAID02000255	hsa-let-7c-5p	miRNA	MIMAT0000064	Homo sapiens	FUS	protein	2521	Homo sapiens	CLIP-seq	starBase	None	0.5483
RAID02000557	hsa-miR-28-5p	miRNA	MIMAT0000085	Homo sapiens	LIN28B	protein	389421	Homo sapiens	CLIP-seq	starBase	None	0.5483
RAID02003350	hsa-miR-30b-5p	miRNA	MIMAT0000420	Homo sapiens	PTBP1	protein	5725	Homo sapiens	CLIP-seq	starBase	None	0.5483
RAID02003788	mmu-mir-669a-8	miRNA	MI0014066	Mus musculus	Fus	protein	233908	Mus musculus	CLIP-seq	starBase	None	0.5483
RAID02004022	hsa-miR-10b-5p	miRNA	MIMAT0000254	Homo sapiens	LIN28B	protein	389421	Homo sapiens	CLIP-seq	starBase	None	0.5483
RAID02004207	hsa-miR-181a-5p	miRNA	MIMAT0000256	Homo sapiens	PTPN22	protein	26191	Homo sapiens	Western Blot//Reporter Assay//RT-PCR	RAID	17382377	0.9526
RAID02005473	hsa-miR-23b-3p	miRNA	MIMAT0000418	Homo sapiens	PTBP1	protein	5725	Homo sapiens	CLIP-seq	starBase	None	0.5483
RAID02006549	hsa-miR-639	miRNA	MIMAT0003309	Homo sapiens	FMR1	protein	2332	Homo sapiens	CLIP-seq	starBase	None	0.5483
RAID02006655	hsa-miR-3620-3p	miRNA	MIMAT0018001	Homo sapiens	LIN28A	protein	79727	Homo sapiens	CLIP-seq//CLIP	NPInter//starBase	22959275	0.6606
RAID02007237	hsa-miR-573	miRNA	MIMAT0003238	Homo sapiens	FMR1	protein	2332	Homo sapiens	CLIP-seq	starBase	None	0.5483
RAID02007515	hsa-miR-4657	miRNA	MIMAT0019724	Homo sapiens	FUS	protein	2521	Homo sapiens	CLIP-seq	starBase	None	0.5483
RAID02007771	hsa-miR-532-5p	miRNA	MIMAT0002888	Homo sapiens	LIN28B	protein	389421	Homo sapiens	CLIP-seq	starBase	None	0.5483
RAID02007996	rno-miR-16-5p	miRNA	MIMAT0000785	Rattus norvegicus	Ptgs2	protein	29527	Rattus norvegicus	ELISA (enzyme linked immunosorbent assay)//Western Blot//RT-PCR	RAID	25196524	0.9526
RAID02009513	hsa-miR-181c-5p	miRNA	MIMAT0000258	Homo sapiens	LIN28A	protein	79727	Homo sapiens	CLIP-seq	starBase	None	0.5483
RAID02010990	hsa-miR-581	miRNA	MIMAT0003246	Homo sapiens	DGCR8	protein	54487	Homo sapiens	CLIP-seq	starBase	None	0.5483
RAID02011212	hsa-miR-320a	miRNA	MIMAT0000510	Homo sapiens	LIN28B	protein	389421	Homo sapiens	CLIP-seq	starBase	None	0.5483
RAID02011662	hsa-miR-663a	miRNA	MIMAT0003326	Homo sapiens	DGCR8	protein	54487	Homo sapiens	CLIP-seq	starBase	None	0.5483
RAID02013319	hsa-miR-133b	miRNA	MIMAT0000770	Homo sapiens	KCNH2	protein	3757	Homo sapiens	Reporter Assay//RT-PCR//Western Blot	RAID	17344217	0.9526
RAID02013809	hsa-miR-367-5p	miRNA	MIMAT0004686	Homo sapiens	LIN28A	protein	79727	Homo sapiens	CLIP	NPInter	22959275	0.5483
RAID02016247	hsa-miR-497-5p	miRNA	MIMAT0002820	Homo sapiens	LIN28B	protein	389421	Homo sapiens	CLIP-seq	starBase	None	0.5483
RAID02019419	hsa-mir-2467	miRNA	MI0017432	Homo sapiens	DGCR8	protein	54487	Homo sapiens	CLIP-seq	starBase	None	0.5483
RAID02019717	hsa-miR-628-3p	miRNA	MIMAT0003297	Homo sapiens	EIF4A3	protein	9775	Homo sapiens	CLIP-seq	starBase	None	0.5483
RAID02020128	mmu-let-7b-5p	miRNA	MIMAT0000522	Mus musculus	Lin28b	protein	380669	Mus musculus	RT-PCR	RAID	23811688//21512136	0.7311
RAID02021086	hsa-let-7f-1	miRNA	MI0000067	Homo sapiens	PTBP1	protein	5725	Homo sapiens	CLIP-seq	starBase	None	0.5483
RAID02021241	hsa-mir-101-2	miRNA	MI0000739	Homo sapiens	DGCR8	protein	54487	Homo sapiens	CLIP-seq	starBase	None	0.5483
RAID02021610	hsa-miR-4751	miRNA	MIMAT0019888	Homo sapiens	ELAVL1	protein	1994	Homo sapiens	CLIP-seq	starBase	None	0.5483
RAID02022691	hsa-mir-3198-2	miRNA	MI0017335	Homo sapiens	IGF2BP1	protein	10642	Homo sapiens	CLIP-seq	starBase	None	0.5483
RAID02023711	hsa-miR-374a-5p	miRNA	MIMAT0000727	Homo sapiens	DGCR8	protein	54487	Homo sapiens	CLIP-seq	starBase	None	0.5483
RAID02024714	hsa-miR-16-5p	miRNA	MIMAT0000069	Homo sapiens	LIN28A	protein	79727	Homo sapiens	CLIP	NPInter	22959275	0.5483
RAID02027554	hsa-mir-3687-1	miRNA	MI0016088	Homo sapiens	LIN28A	protein	79727	Homo sapiens	CLIP-seq	starBase	None	0.5483
RAID02030600	hsa-miR-3621	miRNA	MIMAT0018002	Homo sapiens	EIF4A3	protein	9775	Homo sapiens	CLIP-seq	starBase	None	0.5483
RAID02032197	hsa-miR-615-3p	miRNA	MIMAT0003283	Homo sapiens	LIN28B	protein	389421	Homo sapiens	CLIP-seq	starBase	None	0.5483
RAID02033622	hsa-miR-146a-5p	miRNA	MIMAT0000449	Homo sapiens	FMR1	protein	2332	Homo sapiens	CLIP-seq	starBase	None	0.5483
RAID02033643	mmu-mir-124-1	miRNA	MI0000716	Mus musculus	Fus	protein	233908	Mus musculus	CLIP-seq	starBase	None	0.5483
RAID02033817	hsa-let-7f-2	miRNA	MI0000068	Homo sapiens	LIN28A	protein	79727	Homo sapiens	CLIP-seq	starBase	None	0.5483
RAID02039392	hsa-miR-197-3p	miRNA	MIMAT0000227	Homo sapiens	LIN28B	protein	389421	Homo sapiens	CLIP-seq	starBase	None	0.5483
RAID02041430	hsa-miR-320a	miRNA	MIMAT0000510	Homo sapiens	FXR1	protein	8087	Homo sapiens	CLIP-seq	starBase	None	0.5483
RAID02042080	hsa-miR-320a	miRNA	MIMAT0000510	Homo sapiens	DGCR8	protein	54487	Homo sapiens	CLIP-seq	starBase	None	0.5483
RAID02042383	hsa-miR-574-3p	miRNA	MIMAT0003239	Homo sapiens	FUS	protein	2521	Homo sapiens	CLIP-seq	starBase	None	0.5483
RAID02043783	hsa-mir-4712	miRNA	MI0017346	Homo sapiens	DGCR8	protein	54487	Homo sapiens	CLIP-seq	starBase	None	0.5483
RAID02044804	hsa-miR-3661	miRNA	MIMAT0018082	Homo sapiens	DGCR8	protein	54487	Homo sapiens	CLIP-seq	starBase	None	0.5483
RAID02048120	hsa-miR-148a-3p	miRNA	MIMAT0000243	Homo sapiens	EIF4A3	protein	9775	Homo sapiens	CLIP-seq	starBase	None	0.5483
RAID02050523	mmu-mir-21a	miRNA	MI0000569	Mus musculus	Mbnl1	protein	56758	Mus musculus	CLIP-seq	starBase	None	0.5483
RAID02051230	hsa-miR-130b-3p	miRNA	MIMAT0000691	Homo sapiens	LIN28B	protein	389421	Homo sapiens	CLIP-seq	starBase	None	0.5483
RAID02052175	mmu-miR-137-3p	miRNA	MIMAT0000149	Mus musculus	Fus	protein	233908	Mus musculus	CLIP-seq	starBase	None	0.5483
RAID02052885	hsa-miR-1307-3p	miRNA	MIMAT0005951	Homo sapiens	FXR1	protein	8087	Homo sapiens	CLIP-seq	starBase	None	0.5483
RAID02055254	hsa-mir-4732	miRNA	MI0017369	Homo sapiens	FMR1	protein	2332	Homo sapiens	CLIP-seq	starBase	None	0.5483
RAID02055510	hsa-miR-33b-5p	miRNA	MIMAT0003301	Homo sapiens	PTBP1	protein	5725	Homo sapiens	CLIP-seq	starBase	None	0.5483
RAID02056106	hsa-mir-6723	miRNA	MI0022558	Homo sapiens	LIN28A	protein	79727	Homo sapiens	CLIP-seq	starBase	None	0.5483
RAID02061565	mmu-let-7c-5p	miRNA	MIMAT0000523	Mus musculus	Tlr7	protein	170743	Mus musculus	Immunoassay//RT-PCR	RAID	25917529	0.8808
RAID02061883	hsa-miR-1181	miRNA	MIMAT0005826	Homo sapiens	FMR1	protein	2332	Homo sapiens	CLIP-seq	starBase	None	0.5483
RAID02062270	hsa-miR-136-5p	miRNA	MIMAT0000448	Homo sapiens	FUS	protein	2521	Homo sapiens	CLIP-seq	starBase	None	0.5483
RAID02068830	mmu-miR-301b-3p	miRNA	MIMAT0004186	Mus musculus	Fus	protein	233908	Mus musculus	CLIP-seq	starBase	None	0.5483
RAID02068892	hsa-miR-618	miRNA	MIMAT0003287	Homo sapiens	FUS	protein	2521	Homo sapiens	CLIP-seq	starBase	None	0.5483
RAID02069007	mmu-miR-1306-3p	miRNA	MIMAT0009411	Mus musculus	Rbm3	protein	19652	Mus musculus	CLIP-seq	starBase	None	0.5483
RAID02070531	hsa-mir-3614	miRNA	MI0016004	Homo sapiens	LIN28A	protein	79727	Homo sapiens	CLIP-seq	starBase	None	0.5483
RAID02070793	hsa-miR-423-3p	miRNA	MIMAT0001340	Homo sapiens	EWSR1	protein	2130	Homo sapiens	CLIP-seq	starBase	None	0.5483
RAID02071645	mmu-miR-669f-3p	miRNA	MIMAT0005839	Mus musculus	Fus	protein	233908	Mus musculus	CLIP-seq	starBase	None	0.5483
RAID02073046	hsa-miR-4326	miRNA	MIMAT0016888	Homo sapiens	EIF4A3	protein	9775	Homo sapiens	CLIP-seq	starBase	None	0.5483
RAID02078011	hsa-mir-4720	miRNA	MI0017355	Homo sapiens	FXR1	protein	8087	Homo sapiens	CLIP-seq	starBase	None	0.5483
RAID02078012	mmu-miR-217-5p	miRNA	MIMAT0000679	Mus musculus	Fus	protein	233908	Mus musculus	CLIP-seq	starBase	None	0.5483
RAID02079988	hsa-mir-181a-1	miRNA	MI0000289	Homo sapiens	FXR1	protein	8087	Homo sapiens	CLIP-seq	starBase	None	0.5483
RAID02080314	mmu-miR-10a-5p	miRNA	MIMAT0000648	Mus musculus	Cirbp	protein	12696	Mus musculus	CLIP-seq	starBase	None	0.5483
RAID02083033	hsa-miR-30e-3p	miRNA	MIMAT0000693	Homo sapiens	LIN28A	protein	79727	Homo sapiens	CLIP	NPInter	22959275	0.5483
RAID02084415	hsa-mir-4804	miRNA	MI0017452	Homo sapiens	EIF4A3	protein	9775	Homo sapiens	CLIP-seq	starBase	None	0.5483
RAID02085985	hsa-miR-363-3p	miRNA	MIMAT0000707	Homo sapiens	LIN28B	protein	389421	Homo sapiens	CLIP-seq	starBase	None	0.5483
RAID02086569	hsa-mir-92a-2	miRNA	MI0000094	Homo sapiens	DGCR8	protein	54487	Homo sapiens	CLIP-seq	starBase	None	0.5483
RAID02087531	hsa-miR-374b-5p	miRNA	MIMAT0004955	Homo sapiens	DGCR8	protein	54487	Homo sapiens	CLIP-seq	starBase	None	0.5483
RAID02088005	hsa-mir-4700	miRNA	MI0017333	Homo sapiens	FXR2	protein	9513	Homo sapiens	CLIP-seq	starBase	None	0.5483
RAID02091387	hsa-miR-3187-3p	miRNA	MIMAT0015069	Homo sapiens	LIN28B	protein	389421	Homo sapiens	CLIP-seq	starBase	None	0.5483
RAID02096812	hsa-let-7d-5p	miRNA	MIMAT0000065	Homo sapiens	DGCR8	protein	54487	Homo sapiens	CLIP-seq	starBase	None	0.5483
RAID02097577	mmu-miR-143-3p	miRNA	MIMAT0000247	Mus musculus	Fus	protein	233908	Mus musculus	CLIP-seq	starBase	None	0.5483
RAID02097636	hsa-mir-3064	miRNA	MI0017375	Homo sapiens	IGF2BP2	protein	10644	Homo sapiens	CLIP-seq	starBase	None	0.5483
RAID02098055	hsa-miR-3177-3p	miRNA	MIMAT0015054	Homo sapiens	DGCR8	protein	54487	Homo sapiens	CLIP-seq	starBase	None	0.5483
RAID02100447	hsa-mir-4685	miRNA	MI0017317	Homo sapiens	U2AF2	protein	11338	Homo sapiens	CLIP-seq	starBase	None	0.5483
RAID02105410	hsa-mir-3687-1	miRNA	MI0016088	Homo sapiens	NCBP3	protein	55421	Homo sapiens	CLIP-seq	starBase	None	0.5483
RAID02105442	hsa-mir-103a-1	miRNA	MI0000109	Homo sapiens	FUS	protein	2521	Homo sapiens	CLIP-seq	starBase	None	0.5483
RAID02110144	mmu-mir-21a	miRNA	MI0000569	Mus musculus	Ptbp2	protein	56195	Mus musculus	CLIP-seq	starBase	None	0.5483
RAID02116897	hsa-miR-6080	miRNA	MIMAT0023705	Homo sapiens	MOV10	protein	4343	Homo sapiens	CLIP-seq	starBase	None	0.5483
RAID02117443	hsa-miR-4647	miRNA	MIMAT0019709	Homo sapiens	IGF2BP2	protein	10644	Homo sapiens	CLIP-seq	starBase	None	0.5483
RAID02118057	hsa-mir-4714	miRNA	MI0017348	Homo sapiens	FUS	protein	2521	Homo sapiens	CLIP-seq	starBase	None	0.5483
RAID02120047	hsa-miR-302b-5p	miRNA	MIMAT0000714	Homo sapiens	LIN28A	protein	79727	Homo sapiens	CLIP	NPInter	22959275	0.5483
RAID02123694	mmu-miR-148a-3p	miRNA	MIMAT0000516	Mus musculus	Cirbp	protein	12696	Mus musculus	CLIP-seq	starBase	None	0.5483
RAID02126409	hsa-mir-4745	miRNA	MI0017384	Homo sapiens	DGCR8	protein	54487	Homo sapiens	CLIP-seq	starBase	None	0.5483
RAID02128064	hsa-miR-3615	miRNA	MIMAT0017994	Homo sapiens	IGF2BP2	protein	10644	Homo sapiens	CLIP-seq	starBase	None	0.5483
RAID02129603	hsa-miR-328-3p	miRNA	MIMAT0000752	Homo sapiens	LIN28B	protein	389421	Homo sapiens	CLIP-seq	starBase	None	0.5483
RAID02129710	hsa-mir-4720	miRNA	MI0017355	Homo sapiens	TAF15	protein	8148	Homo sapiens	CLIP-seq	starBase	None	0.5483
RAID02130348	hsa-miR-143-3p	miRNA	MIMAT0000435	Homo sapiens	DGCR8	protein	54487	Homo sapiens	CLIP-seq	starBase	None	0.5483
RAID02131291	hsa-miR-4642	miRNA	MIMAT0019702	Homo sapiens	EWSR1	protein	2130	Homo sapiens	CLIP-seq	starBase	None	0.5483
RAID02132171	mmu-miR-27b-3p	miRNA	MIMAT0000126	Mus musculus	Rbm3	protein	19652	Mus musculus	CLIP-seq	starBase	None	0.5483
RAID02133221	hsa-miR-30a-5p	miRNA	MIMAT0000087	Homo sapiens	LIN28A	protein	79727	Homo sapiens	CLIP-seq//CLIP	NPInter//starBase	22959275	0.6606
RAID02133569	hsa-miR-32-5p	miRNA	MIMAT0000090	Homo sapiens	FMR1	protein	2332	Homo sapiens	CLIP-seq	starBase	None	0.5483
RAID02135446	hsa-miR-744-5p	miRNA	MIMAT0004945	Homo sapiens	FUS	protein	2521	Homo sapiens	CLIP-seq	starBase	None	0.5483
RAID02135747	hsa-mir-5001	miRNA	MI0017867	Homo sapiens	DGCR8	protein	54487	Homo sapiens	CLIP-seq	starBase	None	0.5483
RAID02137078	hsa-let-7d-5p	miRNA	MIMAT0000065	Homo sapiens	IGF2BP1	protein	10642	Homo sapiens	RIP (RNA Immunoprecipitation)//PAR-CLIP	RAID	23069990	0.8785
RAID02141327	hsa-miR-27a-3p	miRNA	MIMAT0000084	Homo sapiens	PTBP1	protein	5725	Homo sapiens	CLIP-seq	starBase	None	0.5483
RAID02141685	hsa-miR-146b-5p	miRNA	MIMAT0002809	Homo sapiens	DGCR8	protein	54487	Homo sapiens	CLIP-seq	starBase	None	0.5483
RAID02142125	hsa-miR-19a-3p	miRNA	MIMAT0000073	Homo sapiens	U2AF2	protein	11338	Homo sapiens	CLIP-seq	starBase	None	0.5483
RAID02143631	hsa-miR-375	miRNA	MIMAT0000728	Homo sapiens	DGCR8	protein	54487	Homo sapiens	CLIP-seq	starBase	None	0.5483
RAID02144196	hsa-let-7e-5p	miRNA	MIMAT0000066	Homo sapiens	PTBP1	protein	5725	Homo sapiens	CLIP-seq	starBase	None	0.5483
RAID02144629	hsa-let-7b-5p	miRNA	MIMAT0000063	Homo sapiens	ZC3H7B	protein	23264	Homo sapiens	CLIP-seq	starBase	None	0.5483
RAID02145855	hsa-miR-490-3p	miRNA	MIMAT0002806	Homo sapiens	FUS	protein	2521	Homo sapiens	CLIP-seq	starBase	None	0.5483
RAID02146064	hsa-miR-145-5p	miRNA	MIMAT0000437	Homo sapiens	LIN28B	protein	389421	Homo sapiens	CLIP-seq	starBase	None	0.5483
RAID02146868	hsa-miR-424-5p	miRNA	MIMAT0001341	Homo sapiens	FXR1	protein	8087	Homo sapiens	CLIP-seq	starBase	None	0.5483
RAID02147842	hsa-miR-27a-3p	miRNA	MIMAT0000084	Homo sapiens	EIF4A3	protein	9775	Homo sapiens	CLIP-seq	starBase	None	0.5483
RAID02148270	hsa-mir-1-2	miRNA	MI0000437	Homo sapiens	MBNL1	protein	4154	Homo sapiens	Northern Blot//EMSA (electrophoretic mobility shift assay)//RT-PCR//Nucleic acid uv cross-linking assay	RAID	21685920	0.982
RAID02148493	hsa-mir-5002	miRNA	MI0017868	Homo sapiens	FUS	protein	2521	Homo sapiens	CLIP-seq	starBase	None	0.5483
RAID02149819	cel-miR-48-5p	miRNA	MIMAT0000019	Caenorhabditis elegans	flh-2	protein	175670	Caenorhabditis elegans	Yeast two-hybrid analysis	NPInter	18794349	0.7311
RAID02150584	hsa-mir-450a-2	miRNA	MI0003187	Homo sapiens	DGCR8	protein	54487	Homo sapiens	CLIP-seq	starBase	None	0.5483
RAID02152080	hsa-miR-10a-5p	miRNA	MIMAT0000253	Homo sapiens	FXR2	protein	9513	Homo sapiens	CLIP-seq	starBase	None	0.5483
RAID02153326	hsa-miR-451a	miRNA	MIMAT0001631	Homo sapiens	LIN28B	protein	389421	Homo sapiens	CLIP-seq	starBase	None	0.5483
RAID02153353	hsa-miR-4673	miRNA	MIMAT0019755	Homo sapiens	EIF4A3	protein	9775	Homo sapiens	CLIP-seq	starBase	None	0.5483
RAID02153564	hsa-miR-93-5p	miRNA	MIMAT0000093	Homo sapiens	PTBP1	protein	5725	Homo sapiens	CLIP-seq	starBase	None	0.5483
RAID02153771	hsa-let-7e-5p	miRNA	MIMAT0000066	Homo sapiens	DGCR8	protein	54487	Homo sapiens	CLIP-seq	starBase	None	0.5483
RAID02153890	mmu-mir-770	miRNA	MI0004203	Mus musculus	Fus	protein	233908	Mus musculus	CLIP-seq	starBase	None	0.5483
RAID02154193	hsa-mir-181b-2	miRNA	MI0000683	Homo sapiens	FXR1	protein	8087	Homo sapiens	CLIP-seq	starBase	None	0.5483
RAID02154561	hsa-mir-629	miRNA	MI0003643	Homo sapiens	FMR1	protein	2332	Homo sapiens	CLIP-seq	starBase	None	0.5483
RAID02155723	hsa-mir-365b	miRNA	MI0000769	Homo sapiens	DGCR8	protein	54487	Homo sapiens	CLIP-seq	starBase	None	0.5483
RAID02157085	hsa-let-7g-5p	miRNA	MIMAT0000414	Homo sapiens	LIN28A	protein	79727	Homo sapiens	RIP (RNA Immunoprecipitation)//IP (immunoprecipitation)//Northern Blot//EMSA (electrophoretic mobility shift assay)//Western Blot//RT-PCR//CLIP-seq//CLIP//ChIP (chromatin immunoprecipitation assay)	NPInter//RAID//starBase	18951094//20178735//22959275//26440890//21297634	0.9993
RAID02159397	hsa-miR-487a-3p	miRNA	MIMAT0002178	Homo sapiens	FUS	protein	2521	Homo sapiens	CLIP-seq	starBase	None	0.5483
RAID02160467	hsa-mir-3613	miRNA	MI0016003	Homo sapiens	TNRC6A	protein	27327	Homo sapiens	CLIP-seq	starBase	None	0.5483
RAID02163843	hsa-miR-2110	miRNA	MIMAT0010133	Homo sapiens	QKI	protein	9444	Homo sapiens	CLIP-seq	starBase	None	0.5483
RAID02164423	mmu-miR-335-5p	miRNA	MIMAT0000766	Mus musculus	Fus	protein	233908	Mus musculus	CLIP-seq	starBase	None	0.5483
RAID02167655	hsa-miR-133b	miRNA	MIMAT0000770	Homo sapiens	LIN28A	protein	79727	Homo sapiens	CLIP-seq	starBase	None	0.5483
RAID02168800	hsa-mir-4444-1	miRNA	MI0016787	Homo sapiens	SRSF1	protein	6426	Homo sapiens	CLIP-seq	starBase	None	0.5483
RAID02171187	hsa-miR-1296-5p	miRNA	MIMAT0005794	Homo sapiens	LIN28B	protein	389421	Homo sapiens	CLIP-seq	starBase	None	0.5483
RAID02172087	mmu-miR-21a-5p	miRNA	MIMAT0000530	Mus musculus	Stat5a	protein	20850	Mus musculus	Western Blot//RT-PCR//ChIP (chromatin immunoprecipitation assay)	RAID	21469086	0.9462
RAID02172944	hsa-miR-152-3p	miRNA	MIMAT0000438	Homo sapiens	EIF4A3	protein	9775	Homo sapiens	CLIP-seq	starBase	None	0.5483
RAID02173370	hsa-let-7i-5p	miRNA	MIMAT0000415	Homo sapiens	FXR1	protein	8087	Homo sapiens	CLIP-seq	starBase	None	0.5483
RAID02173667	hsa-mir-135a-1	miRNA	MI0000452	Homo sapiens	FUS	protein	2521	Homo sapiens	CLIP-seq	starBase	None	0.5483
RAID02175377	hsa-miR-148b-3p	miRNA	MIMAT0000759	Homo sapiens	LIN28A	protein	79727	Homo sapiens	CLIP-seq	starBase	None	0.5483
RAID02180883	hsa-miR-122-5p	miRNA	MIMAT0000421	Homo sapiens	LIN28B	protein	389421	Homo sapiens	CLIP-seq	starBase	None	0.5483
RAID02182391	mmu-miR-208a-3p	miRNA	MIMAT0000520	Mus musculus	Med13	protein	327987	Mus musculus	Northern Blot//Reporter Assay//RT-PCR//Western Blot	RAID	17379774	0.982
RAID02183047	mmu-miR-706	miRNA	MIMAT0003496	Mus musculus	Ptbp2	protein	56195	Mus musculus	CLIP-seq	starBase	None	0.5483
RAID02183160	hsa-miR-636	miRNA	MIMAT0003306	Homo sapiens	EIF4A3	protein	9775	Homo sapiens	CLIP-seq	starBase	None	0.5483
RAID02192361	hsa-let-7g-5p	miRNA	MIMAT0000414	Homo sapiens	DGCR8	protein	54487	Homo sapiens	CLIP-seq	starBase	None	0.5483
RAID02192605	hsa-mir-5587	miRNA	MI0019144	Homo sapiens	EIF4A3	protein	9775	Homo sapiens	CLIP-seq	starBase	None	0.5483
RAID02193302	hsa-miR-4532	miRNA	MIMAT0019071	Homo sapiens	FUS	protein	2521	Homo sapiens	CLIP-seq	starBase	None	0.5483
RAID02198773	hsa-miR-188-5p	miRNA	MIMAT0000457	Homo sapiens	DGCR8	protein	54487	Homo sapiens	CLIP-seq	starBase	None	0.5483
RAID02199833	hsa-miR-632	miRNA	MIMAT0003302	Homo sapiens	ELAVL1	protein	1994	Homo sapiens	CLIP-seq	starBase	None	0.5483
RAID02199978	hsa-mir-7-2	miRNA	MI0000264	Homo sapiens	FUS	protein	2521	Homo sapiens	CLIP-seq	starBase	None	0.5483
RAID02200009	hsa-miR-149-5p	miRNA	MIMAT0000450	Homo sapiens	FUS	protein	2521	Homo sapiens	CLIP-seq	starBase	None	0.5483
RAID02203699	hsa-mir-34b	miRNA	MI0000742	Homo sapiens	MYC	protein	4609	Homo sapiens	Western Blot//Reporter Assay	RAID	18768788	0.8808
RAID02203761	hsa-miR-30d-5p	miRNA	MIMAT0000245	Homo sapiens	LIN28B	protein	389421	Homo sapiens	CLIP-seq	starBase	None	0.5483
RAID02204230	mmu-miR-1306-3p	miRNA	MIMAT0009411	Mus musculus	Fus	protein	233908	Mus musculus	CLIP-seq	starBase	None	0.5483
RAID02206529	hsa-miR-106b-5p	miRNA	MIMAT0000680	Homo sapiens	PTBP1	protein	5725	Homo sapiens	CLIP-seq	starBase	None	0.5483
RAID02207226	hsa-miR-181d-5p	miRNA	MIMAT0002821	Homo sapiens	DGCR8	protein	54487	Homo sapiens	CLIP-seq	starBase	None	0.5483
RAID02208350	xtr-let-7i	miRNA	MI0004889	Xenopus (Silurana) tropicalis	lin28a	protein	548523	Xenopus (Silurana) tropicalis	EMSA (electrophoretic mobility shift assay)	RAID	22570413	0.7311
RAID02212807	hsa-miR-410-3p	miRNA	MIMAT0002171	Homo sapiens	FUS	protein	2521	Homo sapiens	CLIP-seq	starBase	None	0.5483
RAID02214187	hsa-miR-184	miRNA	MIMAT0000454	Homo sapiens	LIN28B	protein	389421	Homo sapiens	CLIP-seq	starBase	None	0.5483
RAID02217687	hsa-miR-33b-5p	miRNA	MIMAT0003301	Homo sapiens	FUS	protein	2521	Homo sapiens	CLIP-seq	starBase	None	0.5483
RAID02217785	hsa-miR-22-3p	miRNA	MIMAT0000077	Homo sapiens	PPARA	protein	5465	Homo sapiens	RT-PCR//Reporter Assay//Western Blot	RAID	19011694	0.9526
RAID02221246	hsa-miR-135b-5p	miRNA	MIMAT0000758	Homo sapiens	LIN28A	protein	79727	Homo sapiens	CLIP-seq	starBase	None	0.5483
RAID02222724	hsa-miR-423-3p	miRNA	MIMAT0001340	Homo sapiens	FUS	protein	2521	Homo sapiens	CLIP-seq	starBase	None	0.5483
RAID02222991	hsa-miR-6080	miRNA	MIMAT0023705	Homo sapiens	FUS	protein	2521	Homo sapiens	CLIP-seq	starBase	None	0.5483
RAID02227537	hsa-miR-20a-5p	miRNA	MIMAT0000075	Homo sapiens	TIAL1	protein	7073	Homo sapiens	CLIP-seq	starBase	None	0.5483
RAID02228033	hsa-mir-3648-1	miRNA	MI0016048	Homo sapiens	EIF4A3	protein	9775	Homo sapiens	CLIP-seq	starBase	None	0.5483
RAID02228649	mmu-mir-21	miRNA	MI0000569	Mus musculus	Adarb1	protein	110532	Mus musculus	RT-PCR//Northern Blot	RAID	25582055	0.8808
RAID02228841	mmu-miR-33-5p	miRNA	MIMAT0000667	Mus musculus	Fus	protein	233908	Mus musculus	CLIP-seq	starBase	None	0.5483
RAID02229157	hsa-miR-215-5p	miRNA	MIMAT0000272	Homo sapiens	DGCR8	protein	54487	Homo sapiens	CLIP-seq	starBase	None	0.5483
RAID02230336	hsa-miR-2110	miRNA	MIMAT0010133	Homo sapiens	FUS	protein	2521	Homo sapiens	CLIP-seq	starBase	None	0.5483
RAID02231212	hsa-mir-142	miRNA	MI0000458	Homo sapiens	LIN28B	protein	389421	Homo sapiens	CLIP-seq	starBase	None	0.5483
RAID02237070	hsa-mir-30c-1	miRNA	MI0000736	Homo sapiens	EIF4A3	protein	9775	Homo sapiens	CLIP-seq	starBase	None	0.5483
RAID02237812	hsa-miR-23b-3p	miRNA	MIMAT0000418	Homo sapiens	MYC	protein	4609	Homo sapiens	Northern Blot//RT-PCR	RAID	19219026	0.8808
RAID02237976	hsa-miR-107	miRNA	MIMAT0000104	Homo sapiens	DGCR8	protein	54487	Homo sapiens	CLIP-seq	starBase	None	0.5483
RAID02238574	hsa-miR-4498	miRNA	MIMAT0019033	Homo sapiens	EIF4A3	protein	9775	Homo sapiens	CLIP-seq	starBase	None	0.5483
RAID02239159	hsa-miR-210-3p	miRNA	MIMAT0000267	Homo sapiens	DGCR8	protein	54487	Homo sapiens	CLIP-seq	starBase	None	0.5483
RAID02239262	hsa-mir-542	miRNA	MI0003686	Homo sapiens	FUS	protein	2521	Homo sapiens	CLIP-seq	starBase	None	0.5483
RAID02245738	hsa-miR-181d-5p	miRNA	MIMAT0002821	Homo sapiens	FUS	protein	2521	Homo sapiens	CLIP-seq	starBase	None	0.5483
RAID02246698	hsa-mir-92a-1	miRNA	MI0000093	Homo sapiens	LIN28B	protein	389421	Homo sapiens	CLIP-seq	starBase	None	0.5483
RAID02251479	hsa-miR-1910-5p	miRNA	MIMAT0007884	Homo sapiens	DGCR8	protein	54487	Homo sapiens	CLIP-seq	starBase	None	0.5483
RAID02252811	hsa-mir-4793	miRNA	MI0017440	Homo sapiens	FMR1	protein	2332	Homo sapiens	CLIP-seq	starBase	None	0.5483
RAID02252929	hsa-mir-4720	miRNA	MI0017355	Homo sapiens	MOV10	protein	4343	Homo sapiens	CLIP-seq	starBase	None	0.5483
RAID02253219	hsa-miR-200c-3p	miRNA	MIMAT0000617	Homo sapiens	LIN28A	protein	79727	Homo sapiens	CLIP-seq//CLIP	NPInter//starBase	22959275	0.6606
RAID02255560	hsa-miR-22-3p	miRNA	MIMAT0000077	Homo sapiens	FUS	protein	2521	Homo sapiens	CLIP-seq	starBase	None	0.5483
RAID02257007	hsa-let-7d-5p	miRNA	MIMAT0000065	Homo sapiens	PTBP1	protein	5725	Homo sapiens	CLIP-seq	starBase	None	0.5483
RAID02258043	hsa-miR-3155a	miRNA	MIMAT0015029	Homo sapiens	DGCR8	protein	54487	Homo sapiens	CLIP-seq	starBase	None	0.5483
RAID02258844	hsa-mir-7-1	miRNA	MI0000263	Homo sapiens	MSI2	protein	124540	Homo sapiens	Western Blot//IP (immunoprecipitation)//Pull down Assay//RT-PCR	RAID	23307866	0.982
RAID02259017	hsa-miR-744-5p	miRNA	MIMAT0004945	Homo sapiens	FMR1	protein	2332	Homo sapiens	CLIP-seq	starBase	None	0.5483
RAID02260577	hsa-mir-629	miRNA	MI0003643	Homo sapiens	LIN28B	protein	389421	Homo sapiens	CLIP-seq	starBase	None	0.5483
RAID02262224	hsa-miR-34a-5p	miRNA	MIMAT0000255	Homo sapiens	FXR1	protein	8087	Homo sapiens	CLIP-seq	starBase	None	0.5483
RAID02264405	hsa-miR-5194	miRNA	MIMAT0021125	Homo sapiens	EIF4A3	protein	9775	Homo sapiens	CLIP-seq	starBase	None	0.5483
RAID02267028	hsa-miR-146a-5p	miRNA	MIMAT0000449	Homo sapiens	FUS	protein	2521	Homo sapiens	CLIP-seq	starBase	None	0.5483
RAID02267206	mmu-miR-27b-3p	miRNA	MIMAT0000126	Mus musculus	Fus	protein	233908	Mus musculus	CLIP-seq	starBase	None	0.5483
RAID02267414	hsa-mir-6723	miRNA	MI0022558	Homo sapiens	LIN28B	protein	389421	Homo sapiens	CLIP-seq	starBase	None	0.5483
RAID02267732	hsa-mir-16-1	miRNA	MI0000070	Homo sapiens	FUS	protein	2521	Homo sapiens	CLIP-seq	starBase	None	0.5483
RAID02268632	hsa-miR-412-3p	miRNA	MIMAT0002170	Homo sapiens	FUS	protein	2521	Homo sapiens	CLIP-seq	starBase	None	0.5483
RAID02268936	hsa-miR-21-5p	miRNA	MIMAT0000076	Homo sapiens	FUS	protein	2521	Homo sapiens	CLIP-seq	starBase	None	0.5483
RAID02271262	hsa-miR-628-3p	miRNA	MIMAT0003297	Homo sapiens	DGCR8	protein	54487	Homo sapiens	CLIP-seq	starBase	None	0.5483
RAID02274882	hsa-miR-2110	miRNA	MIMAT0010133	Homo sapiens	EIF4A3	protein	9775	Homo sapiens	CLIP-seq	starBase	None	0.5483
RAID02276459	mmu-mir-9-3	miRNA	MI0000721	Mus musculus	Ptbp2	protein	56195	Mus musculus	CLIP-seq	starBase	None	0.5483
RAID02278544	hsa-miR-200a-3p	miRNA	MIMAT0000682	Homo sapiens	LIN28A	protein	79727	Homo sapiens	CLIP-seq	starBase	None	0.5483
RAID02278896	hsa-miR-1306-3p	miRNA	MIMAT0005950	Homo sapiens	EIF4A3	protein	9775	Homo sapiens	CLIP-seq	starBase	None	0.5483
RAID02282997	mmu-mir-181a-2	miRNA	MI0000223	Mus musculus	Ptbp2	protein	56195	Mus musculus	CLIP-seq	starBase	None	0.5483
RAID02283080	hsa-miR-122-5p	miRNA	MIMAT0000421	Homo sapiens	EIF4A3	protein	9775	Homo sapiens	CLIP-seq	starBase	None	0.5483
RAID02283454	hsa-miR-4426	miRNA	MIMAT0018941	Homo sapiens	SRSF1	protein	6426	Homo sapiens	CLIP-seq	starBase	None	0.5483
RAID02287192	hsa-miR-574-3p	miRNA	MIMAT0003239	Homo sapiens	EIF4A3	protein	9775	Homo sapiens	CLIP-seq	starBase	None	0.5483
RAID02287722	hsa-miR-1262	miRNA	MIMAT0005914	Homo sapiens	DGCR8	protein	54487	Homo sapiens	CLIP-seq	starBase	None	0.5483
RAID02288543	hsa-miR-5699-3p	miRNA	MIMAT0022492	Homo sapiens	TNRC6A	protein	27327	Homo sapiens	CLIP-seq	starBase	None	0.5483
RAID02289741	hsa-miR-605-5p	miRNA	MIMAT0003273	Homo sapiens	EIF4A3	protein	9775	Homo sapiens	CLIP-seq	starBase	None	0.5483
RAID02293496	mmu-mir-3064	miRNA	MI0014026	Mus musculus	Cirbp	protein	12696	Mus musculus	CLIP-seq	starBase	None	0.5483
RAID02294282	hsa-mir-425	miRNA	MI0001448	Homo sapiens	DGCR8	protein	54487	Homo sapiens	CLIP-seq	starBase	None	0.5483
RAID02295880	hsa-mir-4690	miRNA	MI0017323	Homo sapiens	EIF4A3	protein	9775	Homo sapiens	CLIP-seq	starBase	None	0.5483
RAID02296157	hsa-miR-17-5p	miRNA	MIMAT0000070	Homo sapiens	FMR1	protein	2332	Homo sapiens	CLIP-seq	starBase	None	0.5483
RAID02297432	hsa-miR-34a-3p	miRNA	MIMAT0004557	Homo sapiens	LIN28A	protein	79727	Homo sapiens	CLIP	NPInter	22959275	0.5483
RAID02298797	mmu-miR-125a-5p	miRNA	MIMAT0000135	Mus musculus	Fus	protein	233908	Mus musculus	CLIP-seq	starBase	None	0.5483
RAID02299814	mmu-miR-546	miRNA	MIMAT0003166	Mus musculus	Fus	protein	233908	Mus musculus	CLIP-seq	starBase	None	0.5483
RAID02300264	hsa-mir-320b-2	miRNA	MI0003839	Homo sapiens	HNRNPC	protein	3183	Homo sapiens	CLIP-seq	starBase	None	0.5483
RAID02300672	hsa-miR-3137	miRNA	MIMAT0015005	Homo sapiens	LIN28A	protein	79727	Homo sapiens	CLIP	NPInter	22959275	0.5483
RAID02303930	hsa-mir-4653	miRNA	MI0017281	Homo sapiens	EIF4A3	protein	9775	Homo sapiens	CLIP-seq	starBase	None	0.5483
RAID02303933	mmu-miR-221-3p	miRNA	MIMAT0000669	Mus musculus	Zfp36	protein	22695	Mus musculus	RIP (RNA Immunoprecipitation)//Western Blot//Reporter Assay//RT-PCR	RAID	20435889	0.982
RAID02304001	hsa-mir-196a-2	miRNA	MI0000279	Homo sapiens	EIF4A3	protein	9775	Homo sapiens	CLIP-seq	starBase	None	0.5483
RAID02304862	hsa-miR-4324	miRNA	MIMAT0016876	Homo sapiens	EIF4A3	protein	9775	Homo sapiens	CLIP-seq	starBase	None	0.5483
RAID02304936	hsa-miR-346	miRNA	MIMAT0000773	Homo sapiens	FUS	protein	2521	Homo sapiens	CLIP-seq	starBase	None	0.5483
RAID02305292	hsa-miR-302c-5p	miRNA	MIMAT0000716	Homo sapiens	LIN28A	protein	79727	Homo sapiens	CLIP	NPInter	22959275	0.5483
RAID02307458	hsa-miR-1825	miRNA	MIMAT0006765	Homo sapiens	DGCR8	protein	54487	Homo sapiens	CLIP-seq	starBase	None	0.5483
RAID02307516	hsa-miR-148a-3p	miRNA	MIMAT0000243	Homo sapiens	DGCR8	protein	54487	Homo sapiens	CLIP-seq	starBase	None	0.5483
RAID02307669	hsa-let-7b-5p	miRNA	MIMAT0000063	Homo sapiens	LIN28A	protein	79727	Homo sapiens	IP (immunoprecipitation)//EMSA (electrophoretic mobility shift assay)//Western Blot//RT-PCR//CLIP-seq//CLIP	NPInter//starBase//RAID	18951094//20178735//22959275//26440890	0.9939
RAID02307824	mmu-mir-24-2	miRNA	MI0000572	Mus musculus	Fus	protein	233908	Mus musculus	CLIP-seq	starBase	None	0.5483
RAID02308222	hsa-miR-576-5p	miRNA	MIMAT0003241	Homo sapiens	DGCR8	protein	54487	Homo sapiens	CLIP-seq	starBase	None	0.5483
RAID02312471	hsa-miR-23b-3p	miRNA	MIMAT0000418	Homo sapiens	FUS	protein	2521	Homo sapiens	CLIP-seq	starBase	None	0.5483
RAID02315277	hsa-miR-30a-5p	miRNA	MIMAT0000087	Homo sapiens	FMR1	protein	2332	Homo sapiens	CLIP-seq	starBase	None	0.5483
RAID02315363	hsa-miR-663a	miRNA	MIMAT0003326	Homo sapiens	LIN28B	protein	389421	Homo sapiens	CLIP-seq	starBase	None	0.5483
RAID02315549	hsa-miR-193b-3p	miRNA	MIMAT0002819	Homo sapiens	FXR1	protein	8087	Homo sapiens	CLIP-seq	starBase	None	0.5483
RAID02315565	mmu-miR-185-5p	miRNA	MIMAT0000214	Mus musculus	Fus	protein	233908	Mus musculus	CLIP-seq	starBase	None	0.5483
RAID02316507	hsa-miR-4523	miRNA	MIMAT0019061	Homo sapiens	EIF4A3	protein	9775	Homo sapiens	CLIP-seq	starBase	None	0.5483
RAID02320424	hsa-mir-4724	miRNA	MI0017361	Homo sapiens	FXR2	protein	9513	Homo sapiens	CLIP-seq	starBase	None	0.5483
RAID02321718	hsa-miR-1307-3p	miRNA	MIMAT0005951	Homo sapiens	EIF4A3	protein	9775	Homo sapiens	CLIP-seq	starBase	None	0.5483
RAID02325408	hsa-mir-101-2	miRNA	MI0000739	Homo sapiens	FUS	protein	2521	Homo sapiens	CLIP-seq	starBase	None	0.5483
RAID02325445	mmu-mir-1906-2	miRNA	MI0015984	Mus musculus	Ptbp2	protein	56195	Mus musculus	CLIP-seq	starBase	None	0.5483
RAID02327611	hsa-miR-148a-3p	miRNA	MIMAT0000243	Homo sapiens	LIN28A	protein	79727	Homo sapiens	CLIP-seq	starBase	None	0.5483
RAID02328142	hsa-miR-644a	miRNA	MIMAT0003314	Homo sapiens	U2AF2	protein	11338	Homo sapiens	CLIP-seq	starBase	None	0.5483
RAID02328190	hsa-miR-19a-3p	miRNA	MIMAT0000073	Homo sapiens	FUS	protein	2521	Homo sapiens	CLIP-seq	starBase	None	0.5483
RAID02328554	hsa-mir-4701	miRNA	MI0017334	Homo sapiens	EIF4A3	protein	9775	Homo sapiens	CLIP-seq	starBase	None	0.5483
RAID02328827	hsa-miR-5047	miRNA	MIMAT0020541	Homo sapiens	EIF4A3	protein	9775	Homo sapiens	CLIP-seq	starBase	None	0.5483
RAID02329389	hsa-miR-146b-5p	miRNA	MIMAT0002809	Homo sapiens	FUS	protein	2521	Homo sapiens	CLIP-seq	starBase	None	0.5483
RAID02329606	hsa-mir-4742	miRNA	MI0017380	Homo sapiens	U2AF2	protein	11338	Homo sapiens	CLIP-seq	starBase	None	0.5483
RAID02332875	hsa-miR-361-5p	miRNA	MIMAT0000703	Homo sapiens	EIF4A3	protein	9775	Homo sapiens	CLIP-seq	starBase	None	0.5483
RAID02333141	mmu-mir-467a-10	miRNA	MI0014076	Mus musculus	Fus	protein	233908	Mus musculus	CLIP-seq	starBase	None	0.5483
RAID02337984	hsa-miR-145-5p	miRNA	MIMAT0000437	Homo sapiens	UPF1	protein	5976	Homo sapiens	CLIP-seq	starBase	None	0.5483
RAID02338583	hsa-miR-4326	miRNA	MIMAT0016888	Homo sapiens	DGCR8	protein	54487	Homo sapiens	CLIP-seq	starBase	None	0.5483
RAID02338804	hsa-miR-612	miRNA	MIMAT0003280	Homo sapiens	U2AF2	protein	11338	Homo sapiens	CLIP-seq	starBase	None	0.5483
RAID02339940	hsa-miR-3652	miRNA	MIMAT0018072	Homo sapiens	FMR1	protein	2332	Homo sapiens	CLIP-seq	starBase	None	0.5483
RAID02342115	hsa-miR-4519	miRNA	MIMAT0019056	Homo sapiens	FUS	protein	2521	Homo sapiens	CLIP-seq	starBase	None	0.5483
RAID02342197	hsa-miR-5703	miRNA	MIMAT0022496	Homo sapiens	EIF4A3	protein	9775	Homo sapiens	CLIP-seq	starBase	None	0.5483
RAID02342444	hsa-miR-100-5p	miRNA	MIMAT0000098	Homo sapiens	LIN28A	protein	79727	Homo sapiens	CLIP-seq//CLIP	NPInter//starBase	22959275	0.6606
RAID02343529	hsa-let-7e	miRNA	MI0000066	Homo sapiens	LIN28A	protein	79727	Homo sapiens	Nuclear magnetic resonance//EMSA (electrophoretic mobility shift assay)	RAID	26045559	0.8808
RAID02346847	hsa-mir-378a	miRNA	MI0000786	Homo sapiens	DGCR8	protein	54487	Homo sapiens	CLIP-seq	starBase	None	0.5483
RAID02346934	mmu-mir-322	miRNA	MI0000590	Mus musculus	Fus	protein	233908	Mus musculus	CLIP-seq	starBase	None	0.5483
RAID02351441	hsa-miR-4743-5p	miRNA	MIMAT0019874	Homo sapiens	EIF4A3	protein	9775	Homo sapiens	CLIP-seq	starBase	None	0.5483
RAID02352487	hsa-mir-142	miRNA	MI0000458	Homo sapiens	DGCR8	protein	54487	Homo sapiens	CLIP-seq	starBase	None	0.5483
RAID02352909	mmu-miR-3078-5p	miRNA	MIMAT0014864	Mus musculus	Hnrnpk	protein	15387	Mus musculus	CLIP-seq	starBase	None	0.5483
RAID02352922	mmu-mir-369	miRNA	MI0003535	Mus musculus	Fus	protein	233908	Mus musculus	CLIP-seq	starBase	None	0.5483
RAID02354892	hsa-miR-4785	miRNA	MIMAT0019949	Homo sapiens	EIF4A3	protein	9775	Homo sapiens	CLIP-seq	starBase	None	0.5483
RAID02357810	hsa-miR-4751	miRNA	MIMAT0019888	Homo sapiens	EIF4A3	protein	9775	Homo sapiens	CLIP-seq	starBase	None	0.5483
RAID02357944	hsa-miR-2116-5p	miRNA	MIMAT0011160	Homo sapiens	EIF4A3	protein	9775	Homo sapiens	CLIP-seq	starBase	None	0.5483
RAID02358606	hsa-miR-4296	miRNA	MIMAT0016845	Homo sapiens	FUS	protein	2521	Homo sapiens	CLIP-seq	starBase	None	0.5483
RAID02361705	hsa-mir-7-3	miRNA	MI0000265	Homo sapiens	EIF4A3	protein	9775	Homo sapiens	CLIP-seq	starBase	None	0.5483
RAID02363223	hsa-miR-24-3p	miRNA	MIMAT0000080	Homo sapiens	TOP1	protein	7150	Homo sapiens	Western Blot	RAID	26748253	0.7311
RAID02364795	hsa-miR-328-3p	miRNA	MIMAT0000752	Homo sapiens	FUS	protein	2521	Homo sapiens	CLIP-seq	starBase	None	0.5483
RAID02367898	hsa-mir-4720	miRNA	MI0017355	Homo sapiens	UPF1	protein	5976	Homo sapiens	CLIP-seq	starBase	None	0.5483
RAID02369113	hsa-mir-4753	miRNA	MI0017392	Homo sapiens	EIF4A3	protein	9775	Homo sapiens	CLIP-seq	starBase	None	0.5483
RAID02370615	cel-miR-48-5p	miRNA	MIMAT0000019	Caenorhabditis elegans	flh-1	protein	177749	Caenorhabditis elegans	Yeast two-hybrid analysis	NPInter	18794349	0.7311
RAID02371497	hsa-miR-30b-5p	miRNA	MIMAT0000420	Homo sapiens	EIF4A3	protein	9775	Homo sapiens	CLIP-seq	starBase	None	0.5483
RAID02372571	ath-MIR172c	miRNA	MI0000991	Arabidopsis thaliana	FCA	protein	827323	Arabidopsis thaliana	RIP (RNA Immunoprecipitation)//EMSA (electrophoretic mobility shift assay)//RT-PCR//Pull down Assay	RAID	22431732	0.982
RAID02373017	hsa-miR-3138	miRNA	MIMAT0015006	Homo sapiens	DGCR8	protein	54487	Homo sapiens	CLIP-seq	starBase	None	0.5483
RAID02373735	hsa-let-7a-5p	miRNA	MIMAT0000062	Homo sapiens	LIN28B	protein	389421	Homo sapiens	RT-PCR//EMSA (electrophoretic mobility shift assay)//Reporter Assay//IP (immunoprecipitation)//Western Blot	RAID	20525879//26440890//18951094	0.9933
RAID02373793	hsa-miR-107	miRNA	MIMAT0000104	Homo sapiens	FXR1	protein	8087	Homo sapiens	CLIP-seq	starBase	None	0.5483
RAID02376863	hsa-miR-30e-5p	miRNA	MIMAT0000692	Homo sapiens	PTBP1	protein	5725	Homo sapiens	CLIP-seq	starBase	None	0.5483
RAID02377539	mmu-mir-26a-1	miRNA	MI0000573	Mus musculus	Fus	protein	233908	Mus musculus	CLIP-seq	starBase	None	0.5483
RAID02378604	mmu-miR-148b-3p	miRNA	MIMAT0000580	Mus musculus	Rbm3	protein	19652	Mus musculus	CLIP-seq	starBase	None	0.5483
RAID02379111	hsa-miR-34a-5p	miRNA	MIMAT0000255	Homo sapiens	PTBP1	protein	5725	Homo sapiens	CLIP-seq	starBase	None	0.5483
RAID02379363	hsa-miR-223-3p	miRNA	MIMAT0000280	Homo sapiens	LIN28B	protein	389421	Homo sapiens	CLIP-seq	starBase	None	0.5483
RAID02380927	hsa-miR-671-5p	miRNA	MIMAT0003880	Homo sapiens	LIN28B	protein	389421	Homo sapiens	CLIP-seq	starBase	None	0.5483
RAID02381768	hsa-mir-3607	miRNA	MI0015997	Homo sapiens	NCBP3	protein	55421	Homo sapiens	CLIP-seq	starBase	None	0.5483
RAID02383604	hsa-miR-28-5p	miRNA	MIMAT0000085	Homo sapiens	DGCR8	protein	54487	Homo sapiens	CLIP-seq	starBase	None	0.5483
RAID02385440	mmu-miR-148b-3p	miRNA	MIMAT0000580	Mus musculus	Cirbp	protein	12696	Mus musculus	CLIP-seq	starBase	None	0.5483
RAID02388440	hsa-miR-19a-3p	miRNA	MIMAT0000073	Homo sapiens	ELAVL1	protein	1994	Homo sapiens	CLIP-seq	starBase	None	0.5483
RAID02389477	hsa-miR-27a-3p	miRNA	MIMAT0000084	Homo sapiens	DGCR8	protein	54487	Homo sapiens	CLIP-seq	starBase	None	0.5483
RAID02390998	hsa-miR-15b-5p	miRNA	MIMAT0000417	Homo sapiens	LIN28B	protein	389421	Homo sapiens	CLIP-seq	starBase	None	0.5483
RAID02391648	hsa-let-7c-5p	miRNA	MIMAT0000064	Homo sapiens	PTBP1	protein	5725	Homo sapiens	CLIP-seq	starBase	None	0.5483
RAID02391755	hsa-miR-500a-5p	miRNA	MIMAT0004773	Homo sapiens	FUS	protein	2521	Homo sapiens	CLIP-seq	starBase	None	0.5483
RAID02392088	hsa-miR-601	miRNA	MIMAT0003269	Homo sapiens	EIF4A3	protein	9775	Homo sapiens	CLIP-seq	starBase	None	0.5483
RAID02392581	rno-miR-21-5p	miRNA	MIMAT0000790	Rattus norvegicus	Faslg	protein	25385	Rattus norvegicus	Western Blot//Reporter Assay//RT-PCR	RAID	22907769	0.9526
RAID02393070	hsa-mir-218-1	miRNA	MI0000294	Homo sapiens	DGCR8	protein	54487	Homo sapiens	CLIP-seq	starBase	None	0.5483
RAID02398831	hsa-let-7f-2	miRNA	MI0000068	Homo sapiens	LIN28B	protein	389421	Homo sapiens	CLIP-seq	starBase	None	0.5483
RAID02402128	hsa-miR-27a-3p	miRNA	MIMAT0000084	Homo sapiens	PPP2R4	protein	5524	Homo sapiens	RT-PCR	RAID	21460851	0.7311
RAID02402372	hsa-miR-27b-3p	miRNA	MIMAT0000419	Homo sapiens	EIF4A3	protein	9775	Homo sapiens	CLIP-seq	starBase	None	0.5483
RAID02404091	hsa-mir-5001	miRNA	MI0017867	Homo sapiens	TNRC6A	protein	27327	Homo sapiens	CLIP-seq	starBase	None	0.5483
RAID02410155	hsa-mir-221	miRNA	MI0000298	Homo sapiens	ADARB1	protein	104	Homo sapiens	RT-PCR//Northern Blot	RAID	25582055	0.8808
RAID02410536	hsa-miR-93-5p	miRNA	MIMAT0000093	Homo sapiens	EIF4A3	protein	9775	Homo sapiens	CLIP-seq	starBase	None	0.5483
RAID02411309	hsa-let-7f-1	miRNA	MI0000067	Homo sapiens	EIF4A3	protein	9775	Homo sapiens	CLIP-seq	starBase	None	0.5483
RAID02411475	hsa-mir-3614	miRNA	MI0016004	Homo sapiens	UPF1	protein	5976	Homo sapiens	CLIP-seq	starBase	None	0.5483
RAID02411700	mmu-miR-5099	miRNA	MIMAT0020606	Mus musculus	Srsf2	protein	20382	Mus musculus	CLIP-seq	starBase	None	0.5483
RAID02414205	hsa-miR-4673	miRNA	MIMAT0019755	Homo sapiens	DGCR8	protein	54487	Homo sapiens	CLIP-seq	starBase	None	0.5483
RAID02414440	hsa-mir-3614	miRNA	MI0016004	Homo sapiens	IGF2BP1	protein	10642	Homo sapiens	CLIP-seq	starBase	None	0.5483
RAID02416247	hsa-miR-620	miRNA	MIMAT0003289	Homo sapiens	EIF4A3	protein	9775	Homo sapiens	CLIP-seq	starBase	None	0.5483
RAID02418190	mmu-miR-23a-3p	miRNA	MIMAT0000532	Mus musculus	Celf2	protein	14007	Mus musculus	Western Blot//Northern Blot//Reporter Assay//RT-PCR	RAID	20299448	0.982
RAID02421380	hsa-miR-130b-3p	miRNA	MIMAT0000691	Homo sapiens	FMR1	protein	2332	Homo sapiens	CLIP-seq	starBase	None	0.5483
RAID02428802	hsa-miR-636	miRNA	MIMAT0003306	Homo sapiens	DGCR8	protein	54487	Homo sapiens	CLIP-seq	starBase	None	0.5483
RAID02428849	mmu-mir-467a-6	miRNA	MI0014065	Mus musculus	Fus	protein	233908	Mus musculus	CLIP-seq	starBase	None	0.5483
RAID02430776	mmu-let-7g-5p	miRNA	MIMAT0000121	Mus musculus	Fus	protein	233908	Mus musculus	CLIP-seq	starBase	None	0.5483
RAID02431024	hsa-miR-1204	miRNA	MIMAT0005868	Homo sapiens	EIF4A3	protein	9775	Homo sapiens	CLIP-seq	starBase	None	0.5483
RAID02431878	hsa-mir-219a-1	miRNA	MI0000296	Homo sapiens	FMR1	protein	2332	Homo sapiens	CLIP-seq	starBase	None	0.5483
RAID02436573	hsa-miR-1306-3p	miRNA	MIMAT0005950	Homo sapiens	FMR1	protein	2332	Homo sapiens	CLIP-seq	starBase	None	0.5483
RAID02437362	hsa-miR-320a	miRNA	MIMAT0000510	Homo sapiens	LIN28A	protein	79727	Homo sapiens	CLIP-seq	starBase	None	0.5483
RAID02437375	cel-let-7-5p	miRNA	MIMAT0000001	Caenorhabditis elegans	alg-2	protein	173468	Caenorhabditis elegans	RNA interference	NPInter	11461699	0.7311
RAID02439095	hsa-miR-152-3p	miRNA	MIMAT0000438	Homo sapiens	DGCR8	protein	54487	Homo sapiens	CLIP-seq	starBase	None	0.5483
RAID02441815	hsa-let-7b-5p	miRNA	MIMAT0000063	Homo sapiens	FUS	protein	2521	Homo sapiens	CLIP-seq	starBase	None	0.5483
RAID02441909	ath-miR398c-3p	miRNA	MIMAT0000950	Arabidopsis thaliana	FCA	protein	827323	Arabidopsis thaliana	RIP (RNA Immunoprecipitation)//EMSA (electrophoretic mobility shift assay)//RT-PCR//Pull down Assay	RAID	22431732	0.982
RAID02442820	mmu-miR-17-5p	miRNA	MIMAT0000649	Mus musculus	Fus	protein	233908	Mus musculus	CLIP-seq	starBase	None	0.5483
RAID02442991	hsa-miR-3146	miRNA	MIMAT0015018	Homo sapiens	EIF4A3	protein	9775	Homo sapiens	CLIP-seq	starBase	None	0.5483
RAID02445079	hsa-mir-4728	miRNA	MI0017365	Homo sapiens	IGF2BP1	protein	10642	Homo sapiens	CLIP-seq	starBase	None	0.5483
RAID02445579	hsa-miR-429	miRNA	MIMAT0001536	Homo sapiens	LIN28B	protein	389421	Homo sapiens	CLIP-seq	starBase	None	0.5483
RAID02446183	hsa-miR-760	miRNA	MIMAT0004957	Homo sapiens	DGCR8	protein	54487	Homo sapiens	CLIP-seq	starBase	None	0.5483
RAID02450239	hsa-miR-10a-3p	miRNA	MIMAT0004555	Homo sapiens	LIN28A	protein	79727	Homo sapiens	CLIP	NPInter	22959275	0.5483
RAID02451161	mmu-miR-5124a	miRNA	MIMAT0020634	Mus musculus	Mbnl1	protein	56758	Mus musculus	CLIP-seq	starBase	None	0.5483
RAID02451661	hsa-miR-1296-5p	miRNA	MIMAT0005794	Homo sapiens	EIF4A3	protein	9775	Homo sapiens	CLIP-seq	starBase	None	0.5483
RAID02452249	hsa-miR-30d-5p	miRNA	MIMAT0000245	Homo sapiens	FMR1	protein	2332	Homo sapiens	CLIP-seq	starBase	None	0.5483
RAID02454890	hsa-let-7e-5p	miRNA	MIMAT0000066	Homo sapiens	IGF2BP1	protein	10642	Homo sapiens	RIP (RNA Immunoprecipitation)//PAR-CLIP	RAID	23069990	0.8785
RAID02455034	mmu-let-7f-5p	miRNA	MIMAT0000525	Mus musculus	Lin28b	protein	380669	Mus musculus	RT-PCR	RAID	23811688	0.7311
RAID02455533	hsa-miR-4321	miRNA	MIMAT0016874	Homo sapiens	FMR1	protein	2332	Homo sapiens	CLIP-seq	starBase	None	0.5483
RAID02456271	hsa-miR-130a-3p	miRNA	MIMAT0000425	Homo sapiens	NRP1	protein	8829	Homo sapiens	Microarray	RAID	26573160	0.5483
RAID02459676	mmu-mir-344d-3	miRNA	MI0004227	Mus musculus	Fus	protein	233908	Mus musculus	CLIP-seq	starBase	None	0.5483
RAID02461246	hsa-miR-663b	miRNA	MIMAT0005867	Homo sapiens	FUS	protein	2521	Homo sapiens	CLIP-seq	starBase	None	0.5483
RAID02463823	hsa-miR-548b-3p	miRNA	MIMAT0003254	Homo sapiens	LIN28A	protein	79727	Homo sapiens	CLIP-seq	starBase	None	0.5483
RAID02463871	hsa-miR-299-3p	miRNA	MIMAT0000687	Homo sapiens	FUS	protein	2521	Homo sapiens	CLIP-seq	starBase	None	0.5483
RAID02464857	mmu-miR-221-3p	miRNA	MIMAT0000669	Mus musculus	Hnrnpd	protein	11991	Mus musculus	RIP (RNA Immunoprecipitation)//Western Blot//Reporter Assay//RT-PCR	RAID	20435889	0.982
RAID02466560	hsa-miR-30a-5p	miRNA	MIMAT0000087	Homo sapiens	TIAL1	protein	7073	Homo sapiens	CLIP-seq	starBase	None	0.5483
RAID02471311	hsa-miR-192-5p	miRNA	MIMAT0000222	Homo sapiens	LIN28B	protein	389421	Homo sapiens	CLIP-seq	starBase	None	0.5483
RAID02473123	mmu-mir-103-1	miRNA	MI0000587	Mus musculus	Fus	protein	233908	Mus musculus	CLIP-seq	starBase	None	0.5483
RAID02474018	hsa-miR-4648	miRNA	MIMAT0019710	Homo sapiens	EIF4A3	protein	9775	Homo sapiens	CLIP-seq	starBase	None	0.5483
RAID02476385	hsa-miR-92a-3p	miRNA	MIMAT0000092	Homo sapiens	ESR2	protein	2100	Homo sapiens	RT-PCR//IHC (Immunohistochemistry)	RAID	26437339	0.8808
RAID02478487	hsa-mir-5010	miRNA	MI0017878	Homo sapiens	U2AF2	protein	11338	Homo sapiens	CLIP-seq	starBase	None	0.5483
RAID02481706	hsa-miR-939-5p	miRNA	MIMAT0004982	Homo sapiens	U2AF2	protein	11338	Homo sapiens	CLIP-seq	starBase	None	0.5483
RAID02481783	hsa-miR-16-2-3p	miRNA	MIMAT0004518	Homo sapiens	LIN28A	protein	79727	Homo sapiens	CLIP	NPInter	22959275	0.5483
RAID02482841	hsa-miR-185-5p	miRNA	MIMAT0000455	Homo sapiens	LIN28A	protein	79727	Homo sapiens	CLIP-seq	starBase	None	0.5483
RAID02484233	hsa-miR-3188	miRNA	MIMAT0015070	Homo sapiens	UPF1	protein	5976	Homo sapiens	CLIP-seq	starBase	None	0.5483
RAID02487335	hsa-miR-222-3p	miRNA	MIMAT0000279	Homo sapiens	TIA1	protein	7072	Homo sapiens	CLIP-seq	starBase	None	0.5483
RAID02488230	hsa-miR-205-5p	miRNA	MIMAT0000266	Homo sapiens	LIN28B	protein	389421	Homo sapiens	CLIP-seq	starBase	None	0.5483
RAID02489757	hsa-mir-425	miRNA	MI0001448	Homo sapiens	FMR1	protein	2332	Homo sapiens	CLIP-seq	starBase	None	0.5483
RAID02489914	mmu-miR-26b-5p	miRNA	MIMAT0000534	Mus musculus	Cirbp	protein	12696	Mus musculus	CLIP-seq	starBase	None	0.5483
RAID02494362	hsa-mir-92a-1	miRNA	MI0000093	Homo sapiens	FMR1	protein	2332	Homo sapiens	CLIP-seq	starBase	None	0.5483
RAID02497218	hsa-mir-103a-2	miRNA	MI0000108	Homo sapiens	SRSF1	protein	6426	Homo sapiens	CLIP-seq	starBase	None	0.5483
RAID02497381	hsa-miR-23b-3p	miRNA	MIMAT0000418	Homo sapiens	EIF4A3	protein	9775	Homo sapiens	CLIP-seq	starBase	None	0.5483
RAID02501548	hsa-mir-30c-1	miRNA	MI0000736	Homo sapiens	DGCR8	protein	54487	Homo sapiens	CLIP-seq	starBase	None	0.5483
RAID02506000	mmu-miR-148b-3p	miRNA	MIMAT0000580	Mus musculus	Fus	protein	233908	Mus musculus	CLIP-seq	starBase	None	0.5483
RAID02506072	hsa-miR-1909-3p	miRNA	MIMAT0007883	Homo sapiens	IGF2BP2	protein	10644	Homo sapiens	CLIP-seq	starBase	None	0.5483
RAID02508284	hsa-mir-320c-1	miRNA	MI0003778	Homo sapiens	FUS	protein	2521	Homo sapiens	CLIP-seq	starBase	None	0.5483
RAID02509498	hsa-miR-296-5p	miRNA	MIMAT0000690	Homo sapiens	LIN28B	protein	389421	Homo sapiens	CLIP-seq	starBase	None	0.5483
RAID02509836	hsa-mir-3064	miRNA	MI0017375	Homo sapiens	PTBP1	protein	5725	Homo sapiens	CLIP-seq	starBase	None	0.5483
RAID02510766	mmu-miR-100-5p	miRNA	MIMAT0000655	Mus musculus	Fus	protein	233908	Mus musculus	CLIP-seq	starBase	None	0.5483
RAID02511911	hsa-miR-632	miRNA	MIMAT0003302	Homo sapiens	FUS	protein	2521	Homo sapiens	CLIP-seq	starBase	None	0.5483
RAID02515179	hsa-miR-1307-3p	miRNA	MIMAT0005951	Homo sapiens	LIN28B	protein	389421	Homo sapiens	CLIP-seq	starBase	None	0.5483
RAID02516295	hsa-miR-554	miRNA	MIMAT0003217	Homo sapiens	EIF4A3	protein	9775	Homo sapiens	CLIP-seq	starBase	None	0.5483
RAID02516634	hsa-miR-4750-5p	miRNA	MIMAT0019887	Homo sapiens	EIF4A3	protein	9775	Homo sapiens	CLIP-seq	starBase	None	0.5483
RAID02517746	hsa-miR-761	miRNA	MIMAT0010364	Homo sapiens	SRSF1	protein	6426	Homo sapiens	CLIP-seq	starBase	None	0.5483
RAID02521393	hsa-miR-1306-3p	miRNA	MIMAT0005950	Homo sapiens	DGCR8	protein	54487	Homo sapiens	CLIP-seq	starBase	None	0.5483
RAID02521548	hsa-miR-30a-5p	miRNA	MIMAT0000087	Homo sapiens	AGO2	protein	27161	Homo sapiens	Northern Blot//IP (immunoprecipitation)	RAID	22844086	0.8808
RAID02521823	hsa-miR-671-5p	miRNA	MIMAT0003880	Homo sapiens	PTBP1	protein	5725	Homo sapiens	CLIP-seq	starBase	None	0.5483
RAID02525036	hsa-miR-2110	miRNA	MIMAT0010133	Homo sapiens	DGCR8	protein	54487	Homo sapiens	CLIP-seq	starBase	None	0.5483
RAID02526475	hsa-miR-424-5p	miRNA	MIMAT0001341	Homo sapiens	PTBP1	protein	5725	Homo sapiens	CLIP-seq	starBase	None	0.5483
RAID02526669	ath-MIR167b	miRNA	MI0000209	Arabidopsis thaliana	DCL1	protein	839574	Arabidopsis thaliana	RIP (RNA Immunoprecipitation)//EMSA (electrophoretic mobility shift assay)//RT-PCR	RAID	26473486	0.9526
RAID02526784	mmu-mir-3064	miRNA	MI0014026	Mus musculus	Mbnl1	protein	56758	Mus musculus	CLIP-seq	starBase	None	0.5483
RAID02527357	hsa-miR-647	miRNA	MIMAT0003317	Homo sapiens	UPF1	protein	5976	Homo sapiens	CLIP-seq	starBase	None	0.5483
RAID02527585	hsa-let-7b-5p	miRNA	MIMAT0000063	Homo sapiens	PTBP1	protein	5725	Homo sapiens	CLIP-seq	starBase	None	0.5483
RAID02527894	hsa-miR-221-3p	miRNA	MIMAT0000278	Homo sapiens	LIN28B	protein	389421	Homo sapiens	CLIP-seq	starBase	None	0.5483
RAID02528931	hsa-mir-181b-2	miRNA	MI0000683	Homo sapiens	DGCR8	protein	54487	Homo sapiens	CLIP-seq	starBase	None	0.5483
RAID02530056	hsa-miR-141-3p	miRNA	MIMAT0000432	Homo sapiens	LIN28A	protein	79727	Homo sapiens	CLIP-seq	starBase	None	0.5483
RAID02530706	hsa-let-7e-5p	miRNA	MIMAT0000066	Homo sapiens	FXR1	protein	8087	Homo sapiens	CLIP-seq	starBase	None	0.5483
RAID02533336	hsa-miR-4651	miRNA	MIMAT0019715	Homo sapiens	EIF4A3	protein	9775	Homo sapiens	CLIP-seq	starBase	None	0.5483
RAID02536636	hsa-mir-3605	miRNA	MI0015995	Homo sapiens	U2AF2	protein	11338	Homo sapiens	CLIP-seq	starBase	None	0.5483
RAID02537264	hsa-miR-27b-3p	miRNA	MIMAT0000419	Homo sapiens	FMR1	protein	2332	Homo sapiens	CLIP-seq	starBase	None	0.5483
RAID02539312	mmu-miR-30d-5p	miRNA	MIMAT0000515	Mus musculus	Fus	protein	233908	Mus musculus	CLIP-seq	starBase	None	0.5483
RAID02541107	mmu-miR-501-5p	miRNA	MIMAT0003508	Mus musculus	Fus	protein	233908	Mus musculus	CLIP-seq	starBase	None	0.5483
RAID02543144	hsa-mir-3613	miRNA	MI0016003	Homo sapiens	IGF2BP3	protein	10643	Homo sapiens	CLIP-seq	starBase	None	0.5483
RAID02543277	mmu-miR-146a-5p	miRNA	MIMAT0000158	Mus musculus	Fus	protein	233908	Mus musculus	CLIP-seq	starBase	None	0.5483
RAID02543793	hsa-mir-4747	miRNA	MI0017386	Homo sapiens	U2AF2	protein	11338	Homo sapiens	CLIP-seq	starBase	None	0.5483
RAID02543802	hsa-miR-579-3p	miRNA	MIMAT0003244	Homo sapiens	DGCR8	protein	54487	Homo sapiens	CLIP-seq	starBase	None	0.5483
RAID02545476	hsa-miR-3615	miRNA	MIMAT0017994	Homo sapiens	IGF2BP1	protein	10642	Homo sapiens	CLIP-seq	starBase	None	0.5483
RAID02545562	mmu-miR-184-3p	miRNA	MIMAT0000213	Mus musculus	Cirbp	protein	12696	Mus musculus	CLIP-seq	starBase	None	0.5483
RAID02546174	hsa-mir-196a-2	miRNA	MI0000279	Homo sapiens	DGCR8	protein	54487	Homo sapiens	CLIP-seq	starBase	None	0.5483
RAID02547951	hsa-miR-125a-5p	miRNA	MIMAT0000443	Homo sapiens	FXR1	protein	8087	Homo sapiens	CLIP-seq	starBase	None	0.5483
RAID02549388	hsa-miR-887-3p	miRNA	MIMAT0004951	Homo sapiens	DGCR8	protein	54487	Homo sapiens	CLIP-seq	starBase	None	0.5483
RAID02550893	hsa-miR-4523	miRNA	MIMAT0019061	Homo sapiens	DGCR8	protein	54487	Homo sapiens	CLIP-seq	starBase	None	0.5483
RAID02552273	hsa-miR-632	miRNA	MIMAT0003302	Homo sapiens	EIF4A3	protein	9775	Homo sapiens	CLIP-seq	starBase	None	0.5483
RAID02552566	hsa-miR-1180-3p	miRNA	MIMAT0005825	Homo sapiens	FXR1	protein	8087	Homo sapiens	CLIP-seq	starBase	None	0.5483
RAID02555489	hsa-mir-320b-2	miRNA	MI0003839	Homo sapiens	PTBP1	protein	5725	Homo sapiens	CLIP-seq	starBase	None	0.5483
RAID02556808	hsa-miR-5047	miRNA	MIMAT0020541	Homo sapiens	ZC3H7B	protein	23264	Homo sapiens	CLIP-seq	starBase	None	0.5483
RAID02558400	mmu-miR-677-5p	miRNA	MIMAT0003451	Mus musculus	Ptbp2	protein	56195	Mus musculus	CLIP-seq	starBase	None	0.5483
RAID02559809	hsa-mir-4761	miRNA	MI0017402	Homo sapiens	EIF4A3	protein	9775	Homo sapiens	CLIP-seq	starBase	None	0.5483
RAID02561382	hsa-miR-2110	miRNA	MIMAT0010133	Homo sapiens	IGF2BP1	protein	10642	Homo sapiens	CLIP-seq	starBase	None	0.5483
RAID02565024	hsa-mir-3687-1	miRNA	MI0016088	Homo sapiens	EWSR1	protein	2130	Homo sapiens	CLIP-seq	starBase	None	0.5483
RAID02566830	hsa-mir-450b	miRNA	MI0005531	Homo sapiens	DGCR8	protein	54487	Homo sapiens	CLIP-seq	starBase	None	0.5483
RAID02571625	hsa-miR-423-3p	miRNA	MIMAT0001340	Homo sapiens	TIA1	protein	7072	Homo sapiens	CLIP-seq	starBase	None	0.5483
RAID02572119	hsa-miR-335-5p	miRNA	MIMAT0000765	Homo sapiens	BCL2L2	protein	599	Homo sapiens	RT-PCR//Reporter Assay	NPInter	23708561	0.8808
RAID02572862	hsa-mir-3607	miRNA	MI0015997	Homo sapiens	EWSR1	protein	2130	Homo sapiens	CLIP-seq	starBase	None	0.5483
RAID02572875	hsa-miR-3145-3p	miRNA	MIMAT0015016	Homo sapiens	TNRC6A	protein	27327	Homo sapiens	CLIP-seq	starBase	None	0.5483
RAID02574673	hsa-miR-455-5p	miRNA	MIMAT0003150	Homo sapiens	PTBP1	protein	5725	Homo sapiens	CLIP-seq	starBase	None	0.5483
RAID02576974	hsa-mir-3180-1	miRNA	MI0014214	Homo sapiens	FUS	protein	2521	Homo sapiens	CLIP-seq	starBase	None	0.5483
RAID02577250	mmu-let-7g	miRNA	MI0000137	Mus musculus	Lin28a	protein	83557	Mus musculus	Western Blot//EMSA (electrophoretic mobility shift assay)//RT-PCR//Nuclear magnetic resonance	RAID	22078496//22013165	0.982
RAID02579660	mmu-miR-1188-5p	miRNA	MIMAT0005843	Mus musculus	Fus	protein	233908	Mus musculus	CLIP-seq	starBase	None	0.5483
RAID02583713	mmu-miR-93-5p	miRNA	MIMAT0000540	Mus musculus	Ptbp2	protein	56195	Mus musculus	CLIP-seq	starBase	None	0.5483
RAID02584859	hsa-miR-1307-3p	miRNA	MIMAT0005951	Homo sapiens	DGCR8	protein	54487	Homo sapiens	CLIP-seq	starBase	None	0.5483
RAID02586911	hsa-miR-5047	miRNA	MIMAT0020541	Homo sapiens	DGCR8	protein	54487	Homo sapiens	CLIP-seq	starBase	None	0.5483
RAID02591096	hsa-miR-452-5p	miRNA	MIMAT0001635	Homo sapiens	EIF4A3	protein	9775	Homo sapiens	CLIP-seq	starBase	None	0.5483
RAID02591756	hsa-miR-423-3p	miRNA	MIMAT0001340	Homo sapiens	CAPRIN1	protein	4076	Homo sapiens	CLIP-seq	starBase	None	0.5483
RAID02592110	ath-MIR167b	miRNA	MI0000209	Arabidopsis thaliana	CDF2	protein	833962	Arabidopsis thaliana	RIP (RNA Immunoprecipitation)//RT-PCR//EMSA (electrophoretic mobility shift assay)//Northern Blot	RAID	26473486	0.982
RAID02592129	hsa-miR-605-5p	miRNA	MIMAT0003273	Homo sapiens	DGCR8	protein	54487	Homo sapiens	CLIP-seq	starBase	None	0.5483
RAID02592585	hsa-mir-3663	miRNA	MI0016064	Homo sapiens	DGCR8	protein	54487	Homo sapiens	CLIP-seq	starBase	None	0.5483
RAID02593041	hsa-let-7a-3	miRNA	MI0000062	Homo sapiens	LIN28A	protein	79727	Homo sapiens	Western Blot//RT-PCR	RAID	26440890	0.8808
RAID02596102	mmu-let-7f-2	miRNA	MI0000563	Mus musculus	Fus	protein	233908	Mus musculus	CLIP-seq	starBase	None	0.5483
RAID02597042	hsa-mir-4722	miRNA	MI0017357	Homo sapiens	EIF4A3	protein	9775	Homo sapiens	CLIP-seq	starBase	None	0.5483
RAID02597817	hsa-let-7g-5p	miRNA	MIMAT0000414	Homo sapiens	FMR1	protein	2332	Homo sapiens	CLIP-seq	starBase	None	0.5483
RAID02597883	hsa-miR-22-3p	miRNA	MIMAT0000077	Homo sapiens	ZC3H7B	protein	23264	Homo sapiens	CLIP-seq	starBase	None	0.5483
RAID02598459	cel-let-7-5p	miRNA	MIMAT0000001	Caenorhabditis elegans	lin-28	protein	172626	Caenorhabditis elegans	RIP (RNA Immunoprecipitation)//Northern Blot//Western Blot//RT-PCR//ChIP (chromatin immunoprecipitation assay)	RAID	21297634	0.9919
RAID02599467	hsa-mir-624	miRNA	MI0003638	Homo sapiens	EIF4A3	protein	9775	Homo sapiens	CLIP-seq	starBase	None	0.5483
RAID02600878	hsa-miR-644a	miRNA	MIMAT0003314	Homo sapiens	HNRNPC	protein	3183	Homo sapiens	CLIP-seq	starBase	None	0.5483
RAID02603820	hsa-miR-193a-3p	miRNA	MIMAT0000459	Homo sapiens	DGCR8	protein	54487	Homo sapiens	CLIP-seq	starBase	None	0.5483
RAID02604442	hsa-miR-374b-5p	miRNA	MIMAT0004955	Homo sapiens	FMR1	protein	2332	Homo sapiens	CLIP-seq	starBase	None	0.5483
RAID02608957	hsa-mir-92a-1	miRNA	MI0000093	Homo sapiens	U2AF2	protein	11338	Homo sapiens	CLIP-seq	starBase	None	0.5483
RAID02613171	hsa-miR-3918	miRNA	MIMAT0018192	Homo sapiens	EIF4A3	protein	9775	Homo sapiens	CLIP-seq	starBase	None	0.5483
RAID02614204	hsa-miR-30b-5p	miRNA	MIMAT0000420	Homo sapiens	DGCR8	protein	54487	Homo sapiens	CLIP-seq	starBase	None	0.5483
RAID02614645	hsa-miR-140-5p	miRNA	MIMAT0000431	Homo sapiens	EIF4A3	protein	9775	Homo sapiens	CLIP-seq	starBase	None	0.5483
RAID02615252	hsa-mir-4680	miRNA	MI0017312	Homo sapiens	UPF1	protein	5976	Homo sapiens	CLIP-seq	starBase	None	0.5483
RAID02616590	hsa-miR-361-5p	miRNA	MIMAT0000703	Homo sapiens	DGCR8	protein	54487	Homo sapiens	CLIP-seq	starBase	None	0.5483
RAID02616643	xtr-let-7b	miRNA	MIMAT0003550	Xenopus (Silurana) tropicalis	lin28a	protein	548523	Xenopus (Silurana) tropicalis	EMSA (electrophoretic mobility shift assay)	RAID	22570413	0.7311
RAID02617212	hsa-mir-3687-1	miRNA	MI0016088	Homo sapiens	FXR2	protein	9513	Homo sapiens	CLIP-seq	starBase	None	0.5483
RAID02619744	mmu-let-7c-2	miRNA	MI0000560	Mus musculus	Lin28a	protein	83557	Mus musculus	Western Blot//EMSA (electrophoretic mobility shift assay)//RT-PCR	RAID	26440890	0.9526
RAID02619766	hsa-mir-4753	miRNA	MI0017392	Homo sapiens	DGCR8	protein	54487	Homo sapiens	CLIP-seq	starBase	None	0.5483
RAID02619886	hsa-miR-20a-3p	miRNA	MIMAT0004493	Homo sapiens	LIN28A	protein	79727	Homo sapiens	CLIP	NPInter	22959275	0.5483
RAID02619963	hsa-miR-4295	miRNA	MIMAT0016844	Homo sapiens	EIF4A3	protein	9775	Homo sapiens	CLIP-seq	starBase	None	0.5483
RAID02626069	hsa-miR-937-3p	miRNA	MIMAT0004980	Homo sapiens	ELAVL1	protein	1994	Homo sapiens	CLIP-seq	starBase	None	0.5483
RAID02627160	hsa-miR-302d-5p	miRNA	MIMAT0004685	Homo sapiens	LIN28A	protein	79727	Homo sapiens	CLIP	NPInter	22959275	0.5483
RAID02628160	mmu-miR-3078-5p	miRNA	MIMAT0014864	Mus musculus	Fus	protein	233908	Mus musculus	CLIP-seq	starBase	None	0.5483
RAID02633290	hsa-miR-556-5p	miRNA	MIMAT0003220	Homo sapiens	EIF4A3	protein	9775	Homo sapiens	CLIP-seq	starBase	None	0.5483
RAID02633808	hsa-miR-663b	miRNA	MIMAT0005867	Homo sapiens	PTBP1	protein	5725	Homo sapiens	CLIP-seq	starBase	None	0.5483
RAID02641579	mmu-miR-433-3p	miRNA	MIMAT0001420	Mus musculus	Fus	protein	233908	Mus musculus	CLIP-seq	starBase	None	0.5483
RAID02642299	hsa-mir-6723	miRNA	MI0022558	Homo sapiens	SRSF1	protein	6426	Homo sapiens	CLIP-seq	starBase	None	0.5483
RAID02642762	hsa-miR-301b-3p	miRNA	MIMAT0004958	Homo sapiens	DGCR8	protein	54487	Homo sapiens	CLIP-seq	starBase	None	0.5483
RAID02643549	mmu-miR-503-5p	miRNA	MIMAT0003188	Mus musculus	Fus	protein	233908	Mus musculus	CLIP-seq	starBase	None	0.5483
RAID02644389	hsa-miR-152-3p	miRNA	MIMAT0000438	Homo sapiens	FMR1	protein	2332	Homo sapiens	CLIP-seq	starBase	None	0.5483
RAID02644635	hsa-mir-4755	miRNA	MI0017395	Homo sapiens	EIF4A3	protein	9775	Homo sapiens	CLIP-seq	starBase	None	0.5483
RAID02645895	hsa-miR-125a-5p	miRNA	MIMAT0000443	Homo sapiens	EIF4A3	protein	9775	Homo sapiens	CLIP-seq	starBase	None	0.5483
RAID02647317	hsa-miR-2110	miRNA	MIMAT0010133	Homo sapiens	TNRC6A	protein	27327	Homo sapiens	CLIP-seq	starBase	None	0.5483
RAID02649719	hsa-miR-3911	miRNA	MIMAT0018185	Homo sapiens	EIF4A3	protein	9775	Homo sapiens	CLIP-seq	starBase	None	0.5483
RAID02650939	hsa-let-7a-2	miRNA	MI0000061	Homo sapiens	FUS	protein	2521	Homo sapiens	CLIP-seq	starBase	None	0.5483
RAID02651834	hsa-miR-148b-3p	miRNA	MIMAT0000759	Homo sapiens	LIN28B	protein	389421	Homo sapiens	CLIP-seq	starBase	None	0.5483
RAID02653502	rno-miR-103-3p	miRNA	MIMAT0000824	Rattus norvegicus	Cav1	protein	25404	Rattus norvegicus	Western Blot	RAID	26038570	0.7311
RAID02653597	hsa-let-7c-5p	miRNA	MIMAT0000064	Homo sapiens	FXR1	protein	8087	Homo sapiens	CLIP-seq	starBase	None	0.5483
RAID02653824	hsa-let-7f-1	miRNA	MI0000067	Homo sapiens	DGCR8	protein	54487	Homo sapiens	CLIP-seq	starBase	None	0.5483
RAID02656902	hsa-miR-93-5p	miRNA	MIMAT0000093	Homo sapiens	DGCR8	protein	54487	Homo sapiens	CLIP-seq	starBase	None	0.5483
RAID02658602	hsa-miR-4449	miRNA	MIMAT0018968	Homo sapiens	EIF4A3	protein	9775	Homo sapiens	CLIP-seq	starBase	None	0.5483
RAID02661574	hsa-miR-454-3p	miRNA	MIMAT0003885	Homo sapiens	LIN28A	protein	79727	Homo sapiens	CLIP-seq	starBase	None	0.5483
RAID02662281	hsa-miR-671-5p	miRNA	MIMAT0003880	Homo sapiens	FMR1	protein	2332	Homo sapiens	CLIP-seq	starBase	None	0.5483
RAID02663318	mmu-miR-136-5p	miRNA	MIMAT0000148	Mus musculus	Fus	protein	233908	Mus musculus	CLIP-seq	starBase	None	0.5483
RAID02664769	ath-MIR164a	miRNA	MI0000197	Arabidopsis thaliana	DCL1	protein	839574	Arabidopsis thaliana	RIP (RNA Immunoprecipitation)//EMSA (electrophoretic mobility shift assay)//RT-PCR	RAID	26473486	0.9526
RAID02665086	hsa-miR-1296-5p	miRNA	MIMAT0005794	Homo sapiens	FMR1	protein	2332	Homo sapiens	CLIP-seq	starBase	None	0.5483
RAID02666562	hsa-miR-301a-3p	miRNA	MIMAT0000688	Homo sapiens	EIF4A3	protein	9775	Homo sapiens	CLIP-seq	starBase	None	0.5483
RAID02667326	hsa-miR-4326	miRNA	MIMAT0016888	Homo sapiens	IGF2BP2	protein	10644	Homo sapiens	CLIP-seq	starBase	None	0.5483
RAID02669412	hsa-miR-29a-3p	miRNA	MIMAT0000086	Homo sapiens	FUS	protein	2521	Homo sapiens	CLIP-seq	starBase	None	0.5483
RAID02671623	hsa-miR-944	miRNA	MIMAT0004987	Homo sapiens	DGCR8	protein	54487	Homo sapiens	CLIP-seq	starBase	None	0.5483
RAID02671991	mmu-miR-1942	miRNA	MIMAT0009407	Mus musculus	Fus	protein	233908	Mus musculus	CLIP-seq	starBase	None	0.5483
RAID02672615	hsa-mir-4685	miRNA	MI0017317	Homo sapiens	EIF4A3	protein	9775	Homo sapiens	CLIP-seq	starBase	None	0.5483
RAID02673138	hsa-miR-497-5p	miRNA	MIMAT0002820	Homo sapiens	FUS	protein	2521	Homo sapiens	CLIP-seq	starBase	None	0.5483
RAID02674373	hsa-mir-521-2	miRNA	MI0003163	Homo sapiens	FUS	protein	2521	Homo sapiens	CLIP-seq	starBase	None	0.5483
RAID02674413	hsa-miR-27b-3p	miRNA	MIMAT0000419	Homo sapiens	DGCR8	protein	54487	Homo sapiens	CLIP-seq	starBase	None	0.5483
RAID02680123	hsa-miR-4313	miRNA	MIMAT0016865	Homo sapiens	FUS	protein	2521	Homo sapiens	CLIP-seq	starBase	None	0.5483
RAID02684417	hsa-miR-27b-3p	miRNA	MIMAT0000419	Homo sapiens	PTBP1	protein	5725	Homo sapiens	CLIP-seq	starBase	None	0.5483
RAID02684759	hsa-miR-148b-3p	miRNA	MIMAT0000759	Homo sapiens	PTBP1	protein	5725	Homo sapiens	CLIP-seq	starBase	None	0.5483
RAID02686502	hsa-let-7b-5p	miRNA	MIMAT0000063	Homo sapiens	HNRNPD	protein	3184	Homo sapiens	RT-PCR//EMSA (electrophoretic mobility shift assay)//Northern Blot//Western Blot	RAID	26253535	0.982
RAID02687783	mmu-miR-293-3p	miRNA	MIMAT0000371	Mus musculus	Ezh2	protein	14056	Mus musculus	CLIP-seq	starBase	None	0.5483
RAID02690451	hsa-miR-21-5p	miRNA	MIMAT0000076	Homo sapiens	EWSR1	protein	2130	Homo sapiens	CLIP	NPInter	24813895	0.5483
RAID02690784	hsa-mir-548f-1	miRNA	MI0006374	Homo sapiens	DGCR8	protein	54487	Homo sapiens	CLIP-seq	starBase	None	0.5483
RAID02691826	hsa-mir-488	miRNA	MI0003123	Homo sapiens	FUS	protein	2521	Homo sapiens	CLIP-seq	starBase	None	0.5483
RAID02691878	hsa-mir-320b-2	miRNA	MI0003839	Homo sapiens	EIF4A3	protein	9775	Homo sapiens	CLIP-seq	starBase	None	0.5483
RAID02693974	hsa-mir-450a-2	miRNA	MI0003187	Homo sapiens	FUS	protein	2521	Homo sapiens	CLIP-seq	starBase	None	0.5483
RAID02696690	hsa-mir-4732	miRNA	MI0017369	Homo sapiens	DGCR8	protein	54487	Homo sapiens	CLIP-seq	starBase	None	0.5483
RAID02698655	hsa-mir-125b-2	miRNA	MI0000470	Homo sapiens	FUS	protein	2521	Homo sapiens	CLIP-seq	starBase	None	0.5483
RAID02698916	hsa-mir-519a-2	miRNA	MI0003182	Homo sapiens	UPF1	protein	5976	Homo sapiens	CLIP-seq	starBase	None	0.5483
RAID02700482	hsa-mir-767	miRNA	MI0003763	Homo sapiens	FUS	protein	2521	Homo sapiens	CLIP-seq	starBase	None	0.5483
RAID02701826	hsa-miR-18a-5p	miRNA	MIMAT0000072	Homo sapiens	PTBP1	protein	5725	Homo sapiens	CLIP-seq	starBase	None	0.5483
RAID02702629	cel-let-7-5p	miRNA	MIMAT0000001	Caenorhabditis elegans	alg-1	protein	181504	Caenorhabditis elegans	RNA interference	NPInter	11461699	0.7311
RAID02702642	hsa-miR-148b-3p	miRNA	MIMAT0000759	Homo sapiens	EIF4A3	protein	9775	Homo sapiens	CLIP-seq	starBase	None	0.5483
RAID02704236	hsa-miR-3134	miRNA	MIMAT0015000	Homo sapiens	EGFR	protein	1956	Homo sapiens	RT-PCR//Reporter Assay	NPInter	23823647	0.8808
RAID02705036	hsa-miR-141-3p	miRNA	MIMAT0000432	Homo sapiens	EIF4A3	protein	9775	Homo sapiens	CLIP-seq	starBase	None	0.5483
RAID02706486	hsa-miR-29a-3p	miRNA	MIMAT0000086	Homo sapiens	FMR1	protein	2332	Homo sapiens	CLIP-seq	starBase	None	0.5483
RAID02706894	hsa-miR-548ax	miRNA	MIMAT0022474	Homo sapiens	IGF2BP1	protein	10642	Homo sapiens	CLIP-seq	starBase	None	0.5483
RAID02708381	mmu-miR-5114	miRNA	MIMAT0020622	Mus musculus	Tardbp	protein	230908	Mus musculus	CLIP-seq	starBase	None	0.5483
RAID02708478	hsa-mir-3064	miRNA	MI0017375	Homo sapiens	FXR2	protein	9513	Homo sapiens	CLIP-seq	starBase	None	0.5483
RAID02709645	hsa-let-7d-5p	miRNA	MIMAT0000065	Homo sapiens	LIN28A	protein	79727	Homo sapiens	IP (immunoprecipitation)//EMSA (electrophoretic mobility shift assay)//Western Blot//RT-PCR//CLIP-seq//CLIP	NPInter//starBase//RAID	18951094//20178735//22959275//26440890	0.9939
RAID02710244	hsa-let-7b-5p	miRNA	MIMAT0000063	Homo sapiens	LIN28B	protein	389421	Homo sapiens	Reporter Assay//IP (immunoprecipitation)//EMSA (electrophoretic mobility shift assay)//Western Blot//RT-PCR//CLIP-seq	RAID//starBase	26440890//20525879//18951094	0.997
RAID02718269	hsa-mir-19b-1	miRNA	MI0000074	Homo sapiens	ELAVL1	protein	1994	Homo sapiens	CLIP-seq	starBase	None	0.5483
RAID02718533	hsa-let-7a-3	miRNA	MI0000062	Homo sapiens	EIF4A3	protein	9775	Homo sapiens	CLIP-seq	starBase	None	0.5483
RAID02719286	hsa-miR-1296-5p	miRNA	MIMAT0005794	Homo sapiens	DGCR8	protein	54487	Homo sapiens	CLIP-seq	starBase	None	0.5483
RAID02720417	hsa-miR-3200-3p	miRNA	MIMAT0015085	Homo sapiens	TNRC6A	protein	27327	Homo sapiens	CLIP-seq	starBase	None	0.5483
RAID02725486	hsa-mir-376a-1	miRNA	MI0000784	Homo sapiens	FUS	protein	2521	Homo sapiens	CLIP-seq	starBase	None	0.5483
RAID02728623	hsa-miR-612	miRNA	MIMAT0003280	Homo sapiens	FUS	protein	2521	Homo sapiens	CLIP-seq	starBase	None	0.5483
RAID02728652	mmu-let-7d-5p	miRNA	MIMAT0000383	Mus musculus	Fus	protein	233908	Mus musculus	CLIP-seq	starBase	None	0.5483
RAID02729408	hsa-mir-4714	miRNA	MI0017348	Homo sapiens	HNRNPC	protein	3183	Homo sapiens	CLIP-seq	starBase	None	0.5483
RAID02731085	hsa-miR-572	miRNA	MIMAT0003237	Homo sapiens	EIF4A3	protein	9775	Homo sapiens	CLIP-seq	starBase	None	0.5483
RAID02733337	hsa-miR-4442	miRNA	MIMAT0018960	Homo sapiens	U2AF2	protein	11338	Homo sapiens	CLIP-seq	starBase	None	0.5483
RAID02733555	mmu-mir-3064	miRNA	MI0014026	Mus musculus	Rbm3	protein	19652	Mus musculus	CLIP-seq	starBase	None	0.5483
RAID02735156	hsa-miR-451a	miRNA	MIMAT0001631	Homo sapiens	ALKBH5	protein	54890	Homo sapiens	CLIP-seq	starBase	None	0.5483
RAID02735687	hsa-miR-224-5p	miRNA	MIMAT0000281	Homo sapiens	PTBP1	protein	5725	Homo sapiens	CLIP-seq	starBase	None	0.5483
RAID02735829	hsa-miR-200a-3p	miRNA	MIMAT0000682	Homo sapiens	FXR1	protein	8087	Homo sapiens	CLIP-seq	starBase	None	0.5483
RAID02738127	hsa-miR-22-3p	miRNA	MIMAT0000077	Homo sapiens	LIN28A	protein	79727	Homo sapiens	CLIP-seq	starBase	None	0.5483
RAID02739510	hsa-miR-505-3p	miRNA	MIMAT0002876	Homo sapiens	LIN28B	protein	389421	Homo sapiens	CLIP-seq	starBase	None	0.5483
RAID02742208	hsa-miR-23b-3p	miRNA	MIMAT0000418	Homo sapiens	DGCR8	protein	54487	Homo sapiens	CLIP-seq	starBase	None	0.5483
RAID02744787	mmu-mir-16-1	miRNA	MI0000565	Mus musculus	Fus	protein	233908	Mus musculus	CLIP-seq	starBase	None	0.5483
RAID02746280	mmu-miR-193b-3p	miRNA	MIMAT0004859	Mus musculus	Fus	protein	233908	Mus musculus	CLIP-seq	starBase	None	0.5483
RAID02747752	hsa-miR-3609	miRNA	MIMAT0017986	Homo sapiens	FMR1	protein	2332	Homo sapiens	CLIP-seq	starBase	None	0.5483
RAID02747882	hsa-miR-107	miRNA	MIMAT0000104	Homo sapiens	FUS	protein	2521	Homo sapiens	CLIP-seq	starBase	None	0.5483
RAID02748989	hsa-miR-663a	miRNA	MIMAT0003326	Homo sapiens	EWSR1	protein	2130	Homo sapiens	CLIP	NPInter	24813895	0.5483
RAID02749064	hsa-miR-1587	miRNA	MIMAT0019077	Homo sapiens	EIF4A3	protein	9775	Homo sapiens	CLIP-seq	starBase	None	0.5483
RAID02749214	hsa-miR-3115	miRNA	MIMAT0014977	Homo sapiens	TNRC6A	protein	27327	Homo sapiens	CLIP-seq	starBase	None	0.5483
RAID02750334	hsa-miR-19a-3p	miRNA	MIMAT0000073	Homo sapiens	EIF4A3	protein	9775	Homo sapiens	CLIP-seq	starBase	None	0.5483
RAID02753290	hsa-miR-345-5p	miRNA	MIMAT0000772	Homo sapiens	LIN28A	protein	79727	Homo sapiens	CLIP-seq	starBase	None	0.5483
RAID02754198	hsa-miR-492	miRNA	MIMAT0002812	Homo sapiens	VEGFA	protein	7422	Homo sapiens	Nucleic acid transfection//Reporter Assay	NPInter	23802567	0.8808
RAID02758095	hsa-miR-548al	miRNA	MIMAT0019024	Homo sapiens	DGCR8	protein	54487	Homo sapiens	CLIP-seq	starBase	None	0.5483
RAID02759046	hsa-mir-4731	miRNA	MI0017368	Homo sapiens	FUS	protein	2521	Homo sapiens	CLIP-seq	starBase	None	0.5483
RAID02761290	hsa-miR-4519	miRNA	MIMAT0019056	Homo sapiens	EIF4A3	protein	9775	Homo sapiens	CLIP-seq	starBase	None	0.5483
RAID02761630	hsa-mir-3614	miRNA	MI0016004	Homo sapiens	ELAVL1	protein	1994	Homo sapiens	CLIP-seq	starBase	None	0.5483
RAID02764801	hsa-miR-29a-3p	miRNA	MIMAT0000086	Homo sapiens	LIN28A	protein	79727	Homo sapiens	CLIP-seq	starBase	None	0.5483
RAID02766681	hsa-mir-4709	miRNA	MI0017342	Homo sapiens	ELAVL1	protein	1994	Homo sapiens	CLIP-seq	starBase	None	0.5483
RAID02769096	hsa-miR-604	miRNA	MIMAT0003272	Homo sapiens	EIF4A3	protein	9775	Homo sapiens	CLIP-seq	starBase	None	0.5483
RAID02769578	mmu-mir-128-2	miRNA	MI0000726	Mus musculus	Fus	protein	233908	Mus musculus	CLIP-seq	starBase	None	0.5483
RAID02771107	hsa-miR-196b-5p	miRNA	MIMAT0001080	Homo sapiens	EIF4A3	protein	9775	Homo sapiens	CLIP-seq	starBase	None	0.5483
RAID02772027	hsa-miR-504-5p	miRNA	MIMAT0002875	Homo sapiens	FUS	protein	2521	Homo sapiens	CLIP-seq	starBase	None	0.5483
RAID02772448	hsa-miR-130a-3p	miRNA	MIMAT0000425	Homo sapiens	DGCR8	protein	54487	Homo sapiens	CLIP-seq	starBase	None	0.5483
RAID02776545	hsa-let-7f-2	miRNA	MI0000068	Homo sapiens	FUS	protein	2521	Homo sapiens	CLIP-seq	starBase	None	0.5483
RAID02779208	hsa-mir-29a	miRNA	MI0000087	Homo sapiens	MCL1	protein	4170	Homo sapiens	Western Blot//Northern Blot//Reporter Assay//RT-PCR	RAID	17404574	0.982
RAID02779272	hsa-miR-25-3p	miRNA	MIMAT0000081	Homo sapiens	FXR1	protein	8087	Homo sapiens	CLIP-seq	starBase	None	0.5483
RAID02780951	mmu-mir-125b-1	miRNA	MI0000725	Mus musculus	Fus	protein	233908	Mus musculus	CLIP-seq	starBase	None	0.5483
RAID02781209	hsa-mir-4645	miRNA	MI0017272	Homo sapiens	EIF4A3	protein	9775	Homo sapiens	CLIP-seq	starBase	None	0.5483
RAID02783334	mmu-miR-382-5p	miRNA	MIMAT0000747	Mus musculus	Fus	protein	233908	Mus musculus	CLIP-seq	starBase	None	0.5483
RAID02783721	hsa-miR-182-5p	miRNA	MIMAT0000259	Homo sapiens	LIN28B	protein	389421	Homo sapiens	CLIP-seq	starBase	None	0.5483
RAID02789924	hsa-miR-888-5p	miRNA	MIMAT0004916	Homo sapiens	FUS	protein	2521	Homo sapiens	CLIP-seq	starBase	None	0.5483
RAID02795551	hsa-miR-4426	miRNA	MIMAT0018941	Homo sapiens	FUS	protein	2521	Homo sapiens	CLIP-seq	starBase	None	0.5483
RAID02795682	hsa-mir-4668	miRNA	MI0017298	Homo sapiens	U2AF2	protein	11338	Homo sapiens	CLIP-seq	starBase	None	0.5483
RAID02798358	hsa-miR-99b-5p	miRNA	MIMAT0000689	Homo sapiens	FXR1	protein	8087	Homo sapiens	CLIP-seq	starBase	None	0.5483
RAID02799526	dme-miR-34-5p	miRNA	MIMAT0000350	Drosophila melanogaster	SmD1	protein	44668	Drosophila melanogaster	Western Blot//Reporter Assay//IP (immunoprecipitation)	RAID	26308709	0.9526
RAID02802518	hsa-miR-2278	miRNA	MIMAT0011778	Homo sapiens	DGCR8	protein	54487	Homo sapiens	CLIP-seq	starBase	None	0.5483
RAID02806944	hsa-miR-615-3p	miRNA	MIMAT0003283	Homo sapiens	FMR1	protein	2332	Homo sapiens	CLIP-seq	starBase	None	0.5483
RAID02808248	mmu-miR-5099	miRNA	MIMAT0020606	Mus musculus	Ezh2	protein	14056	Mus musculus	CLIP-seq	starBase	None	0.5483
RAID02809018	hsa-mir-3607	miRNA	MI0015997	Homo sapiens	FMR1	protein	2332	Homo sapiens	CLIP-seq	starBase	None	0.5483
RAID02809084	hsa-miR-623	miRNA	MIMAT0003292	Homo sapiens	EIF4A3	protein	9775	Homo sapiens	CLIP-seq	starBase	None	0.5483
RAID02809900	hsa-miR-23b-3p	miRNA	MIMAT0000418	Homo sapiens	ALKBH5	protein	54890	Homo sapiens	CLIP-seq	starBase	None	0.5483
RAID02810801	hsa-mir-1225	miRNA	MI0006311	Homo sapiens	FUS	protein	2521	Homo sapiens	CLIP-seq	starBase	None	0.5483
RAID02810825	hsa-mir-516b-1	miRNA	MI0003172	Homo sapiens	LIN28B	protein	389421	Homo sapiens	CLIP-seq	starBase	None	0.5483
RAID02811991	hsa-mir-3605	miRNA	MI0015995	Homo sapiens	FMR1	protein	2332	Homo sapiens	CLIP-seq	starBase	None	0.5483
RAID02813598	hsa-miR-23b-3p	miRNA	MIMAT0000418	Homo sapiens	RTCB	protein	51493	Homo sapiens	CLIP-seq	starBase	None	0.5483
RAID02813993	hsa-miR-182-5p	miRNA	MIMAT0000259	Homo sapiens	EIF4A3	protein	9775	Homo sapiens	CLIP-seq	starBase	None	0.5483
RAID02814066	hsa-let-7f-5p	miRNA	MIMAT0000067	Homo sapiens	IGF2BP1	protein	10642	Homo sapiens	RIP (RNA Immunoprecipitation)//PAR-CLIP	RAID	23069990	0.8785
RAID02816272	hsa-miR-92a-3p	miRNA	MIMAT0000092	Homo sapiens	AGO2	protein	27161	Homo sapiens	Northern Blot//IP (immunoprecipitation)	RAID	22844086	0.8808
RAID02816718	hsa-let-7c	miRNA	MI0000064	Homo sapiens	LIN28A	protein	79727	Homo sapiens	Nuclear magnetic resonance//EMSA (electrophoretic mobility shift assay)	RAID	26045559	0.8808
RAID02817037	hsa-mir-16-1	miRNA	MI0000070	Homo sapiens	LIN28B	protein	389421	Homo sapiens	CLIP-seq	starBase	None	0.5483
RAID02820832	hsa-mir-153-1	miRNA	MI0000463	Homo sapiens	FUS	protein	2521	Homo sapiens	CLIP-seq	starBase	None	0.5483
RAID02821559	mmu-miR-3066-5p	miRNA	MIMAT0014838	Mus musculus	Fus	protein	233908	Mus musculus	CLIP-seq	starBase	None	0.5483
RAID02821895	mmu-miR-686	miRNA	MIMAT0003464	Mus musculus	Mbnl2	protein	105559	Mus musculus	CLIP-seq	starBase	None	0.5483
RAID02821981	hsa-miR-4751	miRNA	MIMAT0019888	Homo sapiens	UPF1	protein	5976	Homo sapiens	CLIP-seq	starBase	None	0.5483
RAID02823140	hsa-miR-4461	miRNA	MIMAT0018983	Homo sapiens	IGF2BP3	protein	10643	Homo sapiens	CLIP-seq	starBase	None	0.5483
RAID02824631	hsa-mir-4444-1	miRNA	MI0016787	Homo sapiens	EIF4A3	protein	9775	Homo sapiens	CLIP-seq	starBase	None	0.5483
RAID02824677	mmu-mir-374b	miRNA	MI0004125	Mus musculus	Fus	protein	233908	Mus musculus	CLIP-seq	starBase	None	0.5483
RAID02825237	hsa-miR-126-3p	miRNA	MIMAT0000445	Homo sapiens	DGCR8	protein	54487	Homo sapiens	CLIP-seq	starBase	None	0.5483
RAID02825538	hsa-miR-193a-3p	miRNA	MIMAT0000459	Homo sapiens	LIN28A	protein	79727	Homo sapiens	CLIP-seq	starBase	None	0.5483
RAID02827110	hsa-miR-3940-3p	miRNA	MIMAT0018356	Homo sapiens	IGF2BP3	protein	10643	Homo sapiens	CLIP-seq	starBase	None	0.5483
RAID02829587	mmu-mir-496a	miRNA	MI0004589	Mus musculus	Fus	protein	233908	Mus musculus	CLIP-seq	starBase	None	0.5483
RAID02830424	hsa-miR-3936	miRNA	MIMAT0018351	Homo sapiens	EIF4A3	protein	9775	Homo sapiens	CLIP-seq	starBase	None	0.5483
RAID02830682	hsa-miR-221-3p	miRNA	MIMAT0000278	Homo sapiens	LIN28A	protein	79727	Homo sapiens	CLIP-seq	starBase	None	0.5483
RAID02831151	hsa-miR-744-5p	miRNA	MIMAT0004945	Homo sapiens	LIN28A	protein	79727	Homo sapiens	CLIP-seq	starBase	None	0.5483
RAID02837156	mmu-miR-551b-3p	miRNA	MIMAT0003890	Mus musculus	Fus	protein	233908	Mus musculus	CLIP-seq	starBase	None	0.5483
RAID02838288	mmu-miR-3078-5p	miRNA	MIMAT0014864	Mus musculus	Ptbp2	protein	56195	Mus musculus	CLIP-seq	starBase	None	0.5483
RAID02842662	hsa-miR-940	miRNA	MIMAT0004983	Homo sapiens	EIF4A3	protein	9775	Homo sapiens	CLIP-seq	starBase	None	0.5483
RAID02844738	hsa-miR-4647	miRNA	MIMAT0019709	Homo sapiens	RTCB	protein	51493	Homo sapiens	CLIP-seq	starBase	None	0.5483
RAID02846044	hsa-mir-92a-1	miRNA	MI0000093	Homo sapiens	ELAVL1	protein	1994	Homo sapiens	CLIP-seq	starBase	None	0.5483
RAID02846661	hsa-miR-361-5p	miRNA	MIMAT0000703	Homo sapiens	FXR1	protein	8087	Homo sapiens	CLIP-seq	starBase	None	0.5483
RAID02846747	hsa-miR-2355-5p	miRNA	MIMAT0016895	Homo sapiens	TNRC6A	protein	27327	Homo sapiens	CLIP-seq	starBase	None	0.5483
RAID02850063	hsa-mir-24-2	miRNA	MI0000081	Homo sapiens	UPF1	protein	5976	Homo sapiens	CLIP-seq	starBase	None	0.5483
RAID02861135	hsa-miR-3155a	miRNA	MIMAT0015029	Homo sapiens	TNRC6A	protein	27327	Homo sapiens	CLIP-seq	starBase	None	0.5483
RAID02865100	hsa-mir-4709	miRNA	MI0017342	Homo sapiens	IGF2BP3	protein	10643	Homo sapiens	CLIP-seq	starBase	None	0.5483
RAID02867296	mmu-miR-100-5p	miRNA	MIMAT0000655	Mus musculus	Igf1r	protein	16001	Mus musculus	Western Blot//RT-PCR	RAID	26191255	0.8808
RAID02867303	hsa-let-7d-3p	miRNA	MIMAT0004484	Homo sapiens	LIN28A	protein	79727	Homo sapiens	CLIP	NPInter	22959275	0.5483
RAID02867378	hsa-miR-190a-5p	miRNA	MIMAT0000458	Homo sapiens	DGCR8	protein	54487	Homo sapiens	CLIP-seq	starBase	None	0.5483
RAID02868667	hsa-mir-4722	miRNA	MI0017357	Homo sapiens	LIN28A	protein	79727	Homo sapiens	CLIP-seq	starBase	None	0.5483
RAID02868716	hsa-miR-4657	miRNA	MIMAT0019724	Homo sapiens	MOV10	protein	4343	Homo sapiens	CLIP-seq	starBase	None	0.5483
RAID02869817	hsa-miR-663a	miRNA	MIMAT0003326	Homo sapiens	FUS	protein	2521	Homo sapiens	CLIP-seq	starBase	None	0.5483
RAID02870333	cel-lin-4-5p	miRNA	MIMAT0000002	Caenorhabditis elegans	alg-2	protein	173468	Caenorhabditis elegans	RNA interference	NPInter	11461699	0.7311
RAID02871029	mmu-mir-30c-2	miRNA	MI0000548	Mus musculus	Fus	protein	233908	Mus musculus	CLIP-seq	starBase	None	0.5483
RAID02871612	hsa-miR-140-5p	miRNA	MIMAT0000431	Homo sapiens	DGCR8	protein	54487	Homo sapiens	CLIP-seq	starBase	None	0.5483
RAID02872199	hsa-miR-3129-5p	miRNA	MIMAT0014992	Homo sapiens	IGF2BP2	protein	10644	Homo sapiens	CLIP-seq	starBase	None	0.5483
RAID02873555	cel-miR-241-5p	miRNA	MIMAT0000297	Caenorhabditis elegans	flh-2	protein	175670	Caenorhabditis elegans	Yeast two-hybrid analysis	NPInter	18794349	0.7311
RAID02873912	mmu-mir-330	miRNA	MI0000607	Mus musculus	Fus	protein	233908	Mus musculus	CLIP-seq	starBase	None	0.5483
RAID02874176	hsa-miR-658	miRNA	MIMAT0003336	Homo sapiens	UPF1	protein	5976	Homo sapiens	CLIP-seq	starBase	None	0.5483
RAID02875785	hsa-miR-556-5p	miRNA	MIMAT0003220	Homo sapiens	DGCR8	protein	54487	Homo sapiens	CLIP-seq	starBase	None	0.5483
RAID02878660	hsa-miR-127-3p	miRNA	MIMAT0000446	Homo sapiens	DGCR8	protein	54487	Homo sapiens	CLIP-seq	starBase	None	0.5483
RAID02880469	hsa-miR-106b-5p	miRNA	MIMAT0000680	Homo sapiens	LIN28A	protein	79727	Homo sapiens	CLIP-seq//CLIP	NPInter//starBase	22959275	0.6606
RAID02880999	hsa-miR-18a-5p	miRNA	MIMAT0000072	Homo sapiens	U2AF2	protein	11338	Homo sapiens	CLIP-seq	starBase	None	0.5483
RAID02882116	hsa-miR-639	miRNA	MIMAT0003309	Homo sapiens	EIF4A3	protein	9775	Homo sapiens	CLIP-seq	starBase	None	0.5483
RAID02882729	hsa-miR-222-3p	miRNA	MIMAT0000279	Homo sapiens	LIN28B	protein	389421	Homo sapiens	CLIP-seq	starBase	None	0.5483
RAID02882779	mmu-miR-1251-5p	miRNA	MIMAT0014824	Mus musculus	Fus	protein	233908	Mus musculus	CLIP-seq	starBase	None	0.5483
RAID02884117	mmu-miR-1903	miRNA	MIMAT0007868	Mus musculus	Ptbp2	protein	56195	Mus musculus	CLIP-seq	starBase	None	0.5483
RAID02884349	mmu-mir-3064	miRNA	MI0014026	Mus musculus	Fus	protein	233908	Mus musculus	CLIP-seq	starBase	None	0.5483
RAID02884640	hsa-mir-4726	miRNA	MI0017363	Homo sapiens	EIF4A3	protein	9775	Homo sapiens	CLIP-seq	starBase	None	0.5483
RAID02888172	hsa-miR-195-5p	miRNA	MIMAT0000461	Homo sapiens	EIF4A3	protein	9775	Homo sapiens	CLIP-seq	starBase	None	0.5483
RAID02888565	mmu-mir-1906-2	miRNA	MI0015984	Mus musculus	Fus	protein	233908	Mus musculus	CLIP-seq	starBase	None	0.5483
RAID02891324	hsa-mir-624	miRNA	MI0003638	Homo sapiens	DGCR8	protein	54487	Homo sapiens	CLIP-seq	starBase	None	0.5483
RAID02891616	hsa-let-7a-5p	miRNA	MIMAT0000062	Homo sapiens	AGO3	protein	192669	Homo sapiens	Northern Blot//IP (immunoprecipitation)	RAID	22844086	0.8808
RAID02892059	mmu-mir-3064	miRNA	MI0014026	Mus musculus	Srsf1	protein	110809	Mus musculus	CLIP-seq	starBase	None	0.5483
RAID02893133	mmu-miR-412-3p	miRNA	MIMAT0001094	Mus musculus	Fus	protein	233908	Mus musculus	CLIP-seq	starBase	None	0.5483
RAID02893897	mmu-miR-484	miRNA	MIMAT0003127	Mus musculus	Fus	protein	233908	Mus musculus	CLIP-seq	starBase	None	0.5483
RAID02894612	hsa-miR-492	miRNA	MIMAT0002812	Homo sapiens	BRAF	protein	673	Homo sapiens	Western Blot	NPInter	23802567	0.7311
RAID02894780	hsa-miR-4449	miRNA	MIMAT0018968	Homo sapiens	DGCR8	protein	54487	Homo sapiens	CLIP-seq	starBase	None	0.5483
RAID02896893	hsa-miR-451a	miRNA	MIMAT0001631	Homo sapiens	AGO2	protein	27161	Homo sapiens	RT-PCR//IP (immunoprecipitation)//Northern Blot	RAID	22844086	0.9526
RAID02897858	hsa-miR-3660	miRNA	MIMAT0018081	Homo sapiens	EIF4A3	protein	9775	Homo sapiens	CLIP-seq	starBase	None	0.5483
RAID02904676	hsa-miR-423-3p	miRNA	MIMAT0001340	Homo sapiens	PTBP1	protein	5725	Homo sapiens	CLIP-seq	starBase	None	0.5483
RAID02904969	hsa-mir-4742	miRNA	MI0017380	Homo sapiens	EIF4A3	protein	9775	Homo sapiens	CLIP-seq	starBase	None	0.5483
RAID02908947	hsa-miR-3911	miRNA	MIMAT0018185	Homo sapiens	DGCR8	protein	54487	Homo sapiens	CLIP-seq	starBase	None	0.5483
RAID02912594	hsa-miR-937-3p	miRNA	MIMAT0004980	Homo sapiens	IGF2BP3	protein	10643	Homo sapiens	CLIP-seq	starBase	None	0.5483
RAID02914671	hsa-mir-4709	miRNA	MI0017342	Homo sapiens	LIN28A	protein	79727	Homo sapiens	CLIP-seq	starBase	None	0.5483
RAID02915656	hsa-miR-301a-3p	miRNA	MIMAT0000688	Homo sapiens	DGCR8	protein	54487	Homo sapiens	CLIP-seq	starBase	None	0.5483
RAID02916665	hsa-miR-30e-5p	miRNA	MIMAT0000692	Homo sapiens	LIN28A	protein	79727	Homo sapiens	CLIP-seq//CLIP	NPInter//starBase	22959275	0.6606
RAID02918800	hsa-miR-125a-5p	miRNA	MIMAT0000443	Homo sapiens	DGCR8	protein	54487	Homo sapiens	CLIP-seq	starBase	None	0.5483
RAID02919205	mmu-miR-20a-5p	miRNA	MIMAT0000529	Mus musculus	Rbm3	protein	19652	Mus musculus	CLIP-seq	starBase	None	0.5483
RAID02920316	hsa-mir-9-3	miRNA	MI0000468	Homo sapiens	FUS	protein	2521	Homo sapiens	CLIP-seq	starBase	None	0.5483
RAID02922711	hsa-mir-105-2	miRNA	MI0000112	Homo sapiens	FUS	protein	2521	Homo sapiens	CLIP-seq	starBase	None	0.5483
RAID02928877	hsa-miR-3682-3p	miRNA	MIMAT0018110	Homo sapiens	IGF2BP3	protein	10643	Homo sapiens	CLIP-seq	starBase	None	0.5483
RAID02929196	hsa-miR-32-5p	miRNA	MIMAT0000090	Homo sapiens	EIF4A3	protein	9775	Homo sapiens	CLIP-seq	starBase	None	0.5483
RAID02931970	hsa-miR-30d-5p	miRNA	MIMAT0000245	Homo sapiens	FUS	protein	2521	Homo sapiens	CLIP-seq	starBase	None	0.5483
RAID02933560	hsa-miR-4517	miRNA	MIMAT0019054	Homo sapiens	ZC3H7B	protein	23264	Homo sapiens	CLIP-seq	starBase	None	0.5483
RAID02933960	hsa-miR-612	miRNA	MIMAT0003280	Homo sapiens	EIF4A3	protein	9775	Homo sapiens	CLIP-seq	starBase	None	0.5483
RAID02934227	hsa-mir-320b-2	miRNA	MI0003839	Homo sapiens	DGCR8	protein	54487	Homo sapiens	CLIP-seq	starBase	None	0.5483
RAID02934319	hsa-miR-4744	miRNA	MIMAT0019875	Homo sapiens	EIF4A3	protein	9775	Homo sapiens	CLIP-seq	starBase	None	0.5483
RAID02935098	mmu-miR-30b-5p	miRNA	MIMAT0000130	Mus musculus	Fus	protein	233908	Mus musculus	CLIP-seq	starBase	None	0.5483
RAID02935312	mmu-miR-154-5p	miRNA	MIMAT0000164	Mus musculus	Fus	protein	233908	Mus musculus	CLIP-seq	starBase	None	0.5483
RAID02936062	hsa-mir-26a-1	miRNA	MI0000083	Homo sapiens	FUS	protein	2521	Homo sapiens	CLIP-seq	starBase	None	0.5483
RAID02937535	hsa-mir-4700	miRNA	MI0017333	Homo sapiens	UPF1	protein	5976	Homo sapiens	CLIP-seq	starBase	None	0.5483
RAID02940474	hsa-mir-4755	miRNA	MI0017395	Homo sapiens	DGCR8	protein	54487	Homo sapiens	CLIP-seq	starBase	None	0.5483
RAID02942589	hsa-miR-744-5p	miRNA	MIMAT0004945	Homo sapiens	LIN28B	protein	389421	Homo sapiens	CLIP-seq	starBase	None	0.5483
RAID02942815	hsa-miR-93-5p	miRNA	MIMAT0000093	Homo sapiens	RTCB	protein	51493	Homo sapiens	CLIP-seq	starBase	None	0.5483
RAID02943770	hsa-miR-25-3p	miRNA	MIMAT0000081	Homo sapiens	EIF4A3	protein	9775	Homo sapiens	CLIP-seq	starBase	None	0.5483
RAID02948653	hsa-miR-675-5p	miRNA	MIMAT0004284	Homo sapiens	EIF4A3	protein	9775	Homo sapiens	CLIP-seq	starBase	None	0.5483
RAID02950416	mmu-miR-21a-5p	miRNA	MIMAT0000530	Mus musculus	Sox2	protein	20674	Mus musculus	Western Blot//ISH (In Situ Hybridization)	RAID	26209818	0.8808
RAID02951030	mmu-miR-96-5p	miRNA	MIMAT0000541	Mus musculus	Rbm3	protein	19652	Mus musculus	CLIP-seq	starBase	None	0.5483
RAID02952785	hsa-mir-133a-1	miRNA	MI0000450	Homo sapiens	EIF4A3	protein	9775	Homo sapiens	CLIP-seq	starBase	None	0.5483
RAID02954610	hsa-miR-2277-3p	miRNA	MIMAT0011777	Homo sapiens	IGF2BP3	protein	10643	Homo sapiens	CLIP-seq	starBase	None	0.5483
RAID02958262	hsa-mir-3613	miRNA	MI0016003	Homo sapiens	IGF2BP2	protein	10644	Homo sapiens	CLIP-seq	starBase	None	0.5483
RAID02961576	hsa-miR-937-3p	miRNA	MIMAT0004980	Homo sapiens	EIF4A3	protein	9775	Homo sapiens	CLIP-seq	starBase	None	0.5483
RAID02963234	hsa-miR-5047	miRNA	MIMAT0020541	Homo sapiens	FXR2	protein	9513	Homo sapiens	CLIP-seq	starBase	None	0.5483
RAID02963264	hsa-miR-4721	miRNA	MIMAT0019835	Homo sapiens	RTCB	protein	51493	Homo sapiens	CLIP-seq	starBase	None	0.5483
RAID02965219	hsa-miR-4426	miRNA	MIMAT0018941	Homo sapiens	UPF1	protein	5976	Homo sapiens	CLIP-seq	starBase	None	0.5483
RAID02966750	hsa-miR-4642	miRNA	MIMAT0019702	Homo sapiens	ELAVL1	protein	1994	Homo sapiens	CLIP-seq	starBase	None	0.5483
RAID02967716	hsa-miR-222-3p	miRNA	MIMAT0000279	Homo sapiens	FUS	protein	2521	Homo sapiens	CLIP-seq	starBase	None	0.5483
RAID02968207	hsa-miR-5683	miRNA	MIMAT0022472	Homo sapiens	DGCR8	protein	54487	Homo sapiens	CLIP-seq	starBase	None	0.5483
RAID02968624	hsa-miR-922	miRNA	MIMAT0004972	Homo sapiens	FUS	protein	2521	Homo sapiens	CLIP-seq	starBase	None	0.5483
RAID02969188	hsa-miR-148b-3p	miRNA	MIMAT0000759	Homo sapiens	DGCR8	protein	54487	Homo sapiens	CLIP-seq	starBase	None	0.5483
RAID02969920	hsa-mir-194-2	miRNA	MI0000732	Homo sapiens	LIN28A	protein	79727	Homo sapiens	CLIP-seq	starBase	None	0.5483
RAID02971496	hsa-miR-30a-5p	miRNA	MIMAT0000087	Homo sapiens	AGO1	protein	26523	Homo sapiens	Western Blot//IP (immunoprecipitation)	RAID	26912082	0.8808
RAID02976419	hsa-miR-29c-3p	miRNA	MIMAT0000681	Homo sapiens	FUS	protein	2521	Homo sapiens	CLIP-seq	starBase	None	0.5483
RAID02977733	hsa-miR-10b-5p	miRNA	MIMAT0000254	Homo sapiens	FMR1	protein	2332	Homo sapiens	CLIP-seq	starBase	None	0.5483
RAID02979377	hsa-mir-4509-1	miRNA	MI0016873	Homo sapiens	FUS	protein	2521	Homo sapiens	CLIP-seq	starBase	None	0.5483
RAID02980734	hsa-let-7a-3	miRNA	MI0000062	Homo sapiens	DGCR8	protein	54487	Homo sapiens	CLIP-seq	starBase	None	0.5483
RAID02982436	hsa-mir-4667	miRNA	MI0017297	Homo sapiens	UPF1	protein	5976	Homo sapiens	CLIP-seq	starBase	None	0.5483
RAID02983639	hsa-mir-16-2	miRNA	MI0000115	Homo sapiens	LIN28B	protein	389421	Homo sapiens	CLIP-seq	starBase	None	0.5483
RAID02984660	hsa-mir-138-1	miRNA	MI0000476	Homo sapiens	FUS	protein	2521	Homo sapiens	CLIP-seq	starBase	None	0.5483
RAID02985232	hsa-miR-100-5p	miRNA	MIMAT0000098	Homo sapiens	LIN28B	protein	389421	Homo sapiens	CLIP-seq	starBase	None	0.5483
RAID02986921	hsa-mir-4639	miRNA	MI0017266	Homo sapiens	U2AF2	protein	11338	Homo sapiens	CLIP-seq	starBase	None	0.5483
RAID02987665	mmu-miR-677-5p	miRNA	MIMAT0003451	Mus musculus	Ezh2	protein	14056	Mus musculus	CLIP-seq	starBase	None	0.5483
RAID02989786	hsa-miR-1587	miRNA	MIMAT0019077	Homo sapiens	DGCR8	protein	54487	Homo sapiens	CLIP-seq	starBase	None	0.5483
RAID02991028	hsa-miR-191-5p	miRNA	MIMAT0000440	Homo sapiens	PTBP1	protein	5725	Homo sapiens	CLIP-seq	starBase	None	0.5483
RAID02991103	hsa-miR-1231	miRNA	MIMAT0005586	Homo sapiens	FUS	protein	2521	Homo sapiens	CLIP-seq	starBase	None	0.5483
RAID02991786	mmu-miR-667-3p	miRNA	MIMAT0003734	Mus musculus	Fus	protein	233908	Mus musculus	CLIP-seq	starBase	None	0.5483
RAID02993036	hsa-mir-3648-1	miRNA	MI0016048	Homo sapiens	FUS	protein	2521	Homo sapiens	CLIP-seq	starBase	None	0.5483
RAID02993060	hsa-miR-1307-3p	miRNA	MIMAT0005951	Homo sapiens	FUS	protein	2521	Homo sapiens	CLIP-seq	starBase	None	0.5483
RAID02994898	mmu-miR-30e-5p	miRNA	MIMAT0000248	Mus musculus	Fus	protein	233908	Mus musculus	CLIP-seq	starBase	None	0.5483
RAID02995181	hsa-miR-10a-5p	miRNA	MIMAT0000253	Homo sapiens	UPF1	protein	5976	Homo sapiens	CLIP-seq	starBase	None	0.5483
RAID02996850	hsa-miR-140-5p	miRNA	MIMAT0000431	Homo sapiens	LIN28B	protein	389421	Homo sapiens	CLIP-seq	starBase	None	0.5483
RAID02998653	hsa-mir-769	miRNA	MI0003834	Homo sapiens	PTBP1	protein	5725	Homo sapiens	CLIP-seq	starBase	None	0.5483
RAID02998757	hsa-miR-9-5p	miRNA	MIMAT0000441	Homo sapiens	NTRK3	protein	4916	Homo sapiens	Western Blot//Reporter Assay//RT-PCR	RAID	17483472	0.9526
RAID03003904	dre-miR-206-3p	miRNA	MIMAT0001866	Danio rerio	myod1	protein	30513	Danio rerio	RT-PCR	RAID	21798255	0.7311
RAID03004941	hsa-miR-545-3p	miRNA	MIMAT0003165	Homo sapiens	EIF4A3	protein	9775	Homo sapiens	CLIP-seq	starBase	None	0.5483
RAID03007586	hsa-miR-33b-5p	miRNA	MIMAT0003301	Homo sapiens	DGCR8	protein	54487	Homo sapiens	CLIP-seq	starBase	None	0.5483
RAID03007821	mmu-miR-10b-5p	miRNA	MIMAT0000208	Mus musculus	Cirbp	protein	12696	Mus musculus	CLIP-seq	starBase	None	0.5483
RAID03009899	hsa-miR-23b-3p	miRNA	MIMAT0000418	Homo sapiens	FMR1	protein	2332	Homo sapiens	CLIP-seq	starBase	None	0.5483
RAID03010957	mmu-mir-26a-1	miRNA	MI0000573	Mus musculus	Ptbp2	protein	56195	Mus musculus	CLIP-seq	starBase	None	0.5483
RAID03014107	hsa-miR-1272	miRNA	MIMAT0005925	Homo sapiens	EIF4A3	protein	9775	Homo sapiens	CLIP-seq	starBase	None	0.5483
RAID03016605	hsa-miR-19a-3p	miRNA	MIMAT0000073	Homo sapiens	DGCR8	protein	54487	Homo sapiens	CLIP-seq	starBase	None	0.5483
RAID03016833	hsa-miR-1226-3p	miRNA	MIMAT0005577	Homo sapiens	LIN28A	protein	79727	Homo sapiens	CLIP	NPInter	22959275	0.5483
RAID03019953	hsa-miR-4461	miRNA	MIMAT0018983	Homo sapiens	QKI	protein	9444	Homo sapiens	CLIP-seq	starBase	None	0.5483
RAID03025929	hsa-miR-3928-3p	miRNA	MIMAT0018205	Homo sapiens	DGCR8	protein	54487	Homo sapiens	CLIP-seq	starBase	None	0.5483
RAID03026526	hsa-let-7a-1	miRNA	MI0000060	Homo sapiens	LIN28A	protein	79727	Homo sapiens	RIP (RNA Immunoprecipitation)//RT-PCR//Reporter Assay//Northern Blot//Western Blot//ChIP (chromatin immunoprecipitation assay)	RAID	25479749//21297634	0.997
RAID03026966	mmu-miR-338-3p	miRNA	MIMAT0000582	Mus musculus	Fus	protein	233908	Mus musculus	CLIP-seq	starBase	None	0.5483
RAID03029700	hsa-miR-127-3p	miRNA	MIMAT0000446	Homo sapiens	FUS	protein	2521	Homo sapiens	CLIP-seq	starBase	None	0.5483
RAID03030228	hsa-mir-4793	miRNA	MI0017440	Homo sapiens	EIF4A3	protein	9775	Homo sapiens	CLIP-seq	starBase	None	0.5483
RAID03031323	mmu-miR-181c-5p	miRNA	MIMAT0000674	Mus musculus	Fus	protein	233908	Mus musculus	CLIP-seq	starBase	None	0.5483
RAID03032612	mmu-mir-138-1	miRNA	MI0000722	Mus musculus	Fus	protein	233908	Mus musculus	CLIP-seq	starBase	None	0.5483
RAID03033499	mmu-miR-493-3p	miRNA	MIMAT0004888	Mus musculus	Fus	protein	233908	Mus musculus	CLIP-seq	starBase	None	0.5483
RAID03034243	hsa-miR-196b-5p	miRNA	MIMAT0001080	Homo sapiens	DGCR8	protein	54487	Homo sapiens	CLIP-seq	starBase	None	0.5483
RAID03034404	hsa-miR-647	miRNA	MIMAT0003317	Homo sapiens	EIF4A3	protein	9775	Homo sapiens	CLIP-seq	starBase	None	0.5483
RAID03036398	hsa-miR-4254	miRNA	MIMAT0016884	Homo sapiens	DGCR8	protein	54487	Homo sapiens	CLIP-seq	starBase	None	0.5483
RAID03037430	hsa-mir-19b-1	miRNA	MI0000074	Homo sapiens	LIN28B	protein	389421	Homo sapiens	CLIP-seq	starBase	None	0.5483
RAID03039304	mmu-miR-20a-5p	miRNA	MIMAT0000529	Mus musculus	Fus	protein	233908	Mus musculus	CLIP-seq	starBase	None	0.5483
RAID03039521	hsa-miR-19a-3p	miRNA	MIMAT0000073	Homo sapiens	LIN28B	protein	389421	Homo sapiens	CLIP-seq	starBase	None	0.5483
RAID03040204	hsa-miR-150-5p	miRNA	MIMAT0000451	Homo sapiens	FUS	protein	2521	Homo sapiens	CLIP-seq	starBase	None	0.5483
RAID03044189	hsa-let-7b-5p	miRNA	MIMAT0000063	Homo sapiens	FMR1	protein	2332	Homo sapiens	CLIP-seq	starBase	None	0.5483
RAID03045699	hsa-miR-1266-5p	miRNA	MIMAT0005920	Homo sapiens	DGCR8	protein	54487	Homo sapiens	CLIP-seq	starBase	None	0.5483
RAID03046276	mmu-miR-300-3p	miRNA	MIMAT0000378	Mus musculus	Fus	protein	233908	Mus musculus	CLIP-seq	starBase	None	0.5483
RAID03046976	mmu-miR-30e-5p	miRNA	MIMAT0000248	Mus musculus	Ptbp2	protein	56195	Mus musculus	CLIP-seq	starBase	None	0.5483
RAID03050597	mmu-miR-5114	miRNA	MIMAT0020622	Mus musculus	Srsf1	protein	110809	Mus musculus	CLIP-seq	starBase	None	0.5483
RAID03051840	hsa-let-7c-5p	miRNA	MIMAT0000064	Homo sapiens	LIN28B	protein	389421	Homo sapiens	Western Blot//EMSA (electrophoretic mobility shift assay)//RT-PCR//CLIP-seq	starBase//RAID	26440890	0.9786
RAID03052032	hsa-miR-3159	miRNA	MIMAT0015033	Homo sapiens	DGCR8	protein	54487	Homo sapiens	CLIP-seq	starBase	None	0.5483
RAID03054063	hsa-miR-4518	miRNA	MIMAT0019055	Homo sapiens	FUS	protein	2521	Homo sapiens	CLIP-seq	starBase	None	0.5483
RAID03056057	mmu-miR-1193-3p	miRNA	MIMAT0005851	Mus musculus	Fus	protein	233908	Mus musculus	CLIP-seq	starBase	None	0.5483
RAID03057793	hsa-miR-1296-5p	miRNA	MIMAT0005794	Homo sapiens	PTBP1	protein	5725	Homo sapiens	CLIP-seq	starBase	None	0.5483
RAID03058363	mmu-miR-350-3p	miRNA	MIMAT0000605	Mus musculus	Fus	protein	233908	Mus musculus	CLIP-seq	starBase	None	0.5483
RAID03060234	hsa-miR-126-3p	miRNA	MIMAT0000445	Homo sapiens	FMR1	protein	2332	Homo sapiens	CLIP-seq	starBase	None	0.5483
RAID03061958	hsa-miR-150-5p	miRNA	MIMAT0000451	Homo sapiens	DGCR8	protein	54487	Homo sapiens	CLIP-seq	starBase	None	0.5483
RAID03062300	hsa-miR-4721	miRNA	MIMAT0019835	Homo sapiens	ELAVL1	protein	1994	Homo sapiens	CLIP-seq	starBase	None	0.5483
RAID03062773	hsa-miR-1228-3p	miRNA	MIMAT0005583	Homo sapiens	EIF4A3	protein	9775	Homo sapiens	CLIP-seq	starBase	None	0.5483
RAID03064004	mmu-miR-132-3p	miRNA	MIMAT0000144	Mus musculus	Fus	protein	233908	Mus musculus	CLIP-seq	starBase	None	0.5483
RAID03065194	mmu-miR-670-5p	miRNA	MIMAT0003736	Mus musculus	Fus	protein	233908	Mus musculus	CLIP-seq	starBase	None	0.5483
RAID03066524	hsa-mir-4714	miRNA	MI0017348	Homo sapiens	EIF4A3	protein	9775	Homo sapiens	CLIP-seq	starBase	None	0.5483
RAID03069531	hsa-miR-133b	miRNA	MIMAT0000770	Homo sapiens	FUS	protein	2521	Homo sapiens	CLIP-seq	starBase	None	0.5483
RAID03069554	hsa-miR-3173-3p	miRNA	MIMAT0015048	Homo sapiens	TNRC6A	protein	27327	Homo sapiens	CLIP-seq	starBase	None	0.5483
RAID03069842	hsa-miR-342-3p	miRNA	MIMAT0000753	Homo sapiens	LIN28B	protein	389421	Homo sapiens	CLIP-seq	starBase	None	0.5483
RAID03070381	hsa-miR-2682-5p	miRNA	MIMAT0013517	Homo sapiens	TNRC6A	protein	27327	Homo sapiens	CLIP-seq	starBase	None	0.5483
RAID03070624	hsa-mir-1255b-1	miRNA	MI0006435	Homo sapiens	EIF4A3	protein	9775	Homo sapiens	CLIP-seq	starBase	None	0.5483
RAID03070823	mmu-miR-669c-5p	miRNA	MIMAT0003479	Mus musculus	Fus	protein	233908	Mus musculus	CLIP-seq	starBase	None	0.5483
RAID03071691	hsa-let-7i-5p	miRNA	MIMAT0000415	Homo sapiens	EIF4A3	protein	9775	Homo sapiens	CLIP-seq	starBase	None	0.5483
RAID03072462	hsa-miR-181d-5p	miRNA	MIMAT0002821	Homo sapiens	LIN28A	protein	79727	Homo sapiens	CLIP-seq	starBase	None	0.5483
RAID03074857	hsa-miR-3191-3p	miRNA	MIMAT0015075	Homo sapiens	EIF4A3	protein	9775	Homo sapiens	CLIP-seq	starBase	None	0.5483
RAID03075736	hsa-miR-374a-5p	miRNA	MIMAT0000727	Homo sapiens	FMR1	protein	2332	Homo sapiens	CLIP-seq	starBase	None	0.5483
RAID03079847	mmu-miR-184-3p	miRNA	MIMAT0000213	Mus musculus	Ago2	protein	239528	Mus musculus	Western Blot//RT-PCR	RAID	26152724	0.8808
RAID03081569	hsa-miR-140-5p	miRNA	MIMAT0000431	Homo sapiens	LIN28A	protein	79727	Homo sapiens	CLIP-seq	starBase	None	0.5483
RAID03083862	hsa-mir-5010	miRNA	MI0017878	Homo sapiens	EIF4A3	protein	9775	Homo sapiens	CLIP-seq	starBase	None	0.5483
RAID03084188	hsa-miR-182-5p	miRNA	MIMAT0000259	Homo sapiens	DGCR8	protein	54487	Homo sapiens	CLIP-seq	starBase	None	0.5483
RAID03086339	hsa-miR-367-3p	miRNA	MIMAT0000719	Homo sapiens	LIN28A	protein	79727	Homo sapiens	CLIP	NPInter	22959275	0.5483
RAID03087265	mmu-miR-15a-5p	miRNA	MIMAT0000526	Mus musculus	Fus	protein	233908	Mus musculus	CLIP-seq	starBase	None	0.5483
RAID03087610	mmu-miR-295-3p	miRNA	MIMAT0000373	Mus musculus	Ezh2	protein	14056	Mus musculus	CLIP-seq	starBase	None	0.5483
RAID03087967	hsa-miR-940	miRNA	MIMAT0004983	Homo sapiens	DGCR8	protein	54487	Homo sapiens	CLIP-seq	starBase	None	0.5483
RAID03090069	hsa-mir-876	miRNA	MI0005542	Homo sapiens	FUS	protein	2521	Homo sapiens	CLIP-seq	starBase	None	0.5483
RAID03091220	hsa-mir-499a	miRNA	MI0003183	Homo sapiens	LIN28B	protein	389421	Homo sapiens	CLIP-seq	starBase	None	0.5483
RAID03095084	hsa-miR-125b-5p	miRNA	MIMAT0000423	Homo sapiens	TIAL1	protein	7073	Homo sapiens	RIP (RNA Immunoprecipitation)//Western Blot//Reporter Assay//RT-PCR	RAID	20435889	0.982
RAID03096235	mmu-miR-130a-3p	miRNA	MIMAT0000141	Mus musculus	Fus	protein	233908	Mus musculus	CLIP-seq	starBase	None	0.5483
RAID03096239	hsa-miR-758-3p	miRNA	MIMAT0003879	Homo sapiens	FUS	protein	2521	Homo sapiens	CLIP-seq	starBase	None	0.5483
RAID03097192	hsa-miR-18a-5p	miRNA	MIMAT0000072	Homo sapiens	ELAVL1	protein	1994	Homo sapiens	CLIP-seq	starBase	None	0.5483
RAID03097757	hsa-miR-3192-5p	miRNA	MIMAT0015076	Homo sapiens	EIF4A3	protein	9775	Homo sapiens	CLIP-seq	starBase	None	0.5483
RAID03097801	hsa-miR-4734	miRNA	MIMAT0019859	Homo sapiens	EIF4A3	protein	9775	Homo sapiens	CLIP-seq	starBase	None	0.5483
RAID03097807	hsa-mir-19b-2	miRNA	MI0000075	Homo sapiens	FUS	protein	2521	Homo sapiens	CLIP-seq	starBase	None	0.5483
RAID03099506	hsa-miR-19a-3p	miRNA	MIMAT0000073	Homo sapiens	LIN28A	protein	79727	Homo sapiens	CLIP-seq//CLIP	NPInter//starBase	22959275	0.6606
RAID03100024	hsa-miR-32-5p	miRNA	MIMAT0000090	Homo sapiens	PTBP1	protein	5725	Homo sapiens	CLIP-seq	starBase	None	0.5483
RAID03103302	hsa-miR-195-5p	miRNA	MIMAT0000461	Homo sapiens	PTBP1	protein	5725	Homo sapiens	CLIP-seq	starBase	None	0.5483
RAID03104805	mmu-let-7a-5p	miRNA	MIMAT0000521	Mus musculus	Lin28b	protein	380669	Mus musculus	RT-PCR	RAID	23811688//21512136	0.7311
RAID03106853	cel-miR-241-5p	miRNA	MIMAT0000297	Caenorhabditis elegans	flh-1	protein	177749	Caenorhabditis elegans	Yeast two-hybrid analysis	NPInter	18794349	0.7311
RAID03107245	mmu-mir-344d-1	miRNA	MI0004524	Mus musculus	Fus	protein	233908	Mus musculus	CLIP-seq	starBase	None	0.5483
RAID03107815	hsa-miR-1307-3p	miRNA	MIMAT0005951	Homo sapiens	LIN28A	protein	79727	Homo sapiens	CLIP-seq//CLIP	NPInter//starBase	22959275	0.6606
RAID03109427	hsa-mir-3614	miRNA	MI0016004	Homo sapiens	EIF4A3	protein	9775	Homo sapiens	CLIP-seq	starBase	None	0.5483
RAID03109763	hsa-miR-939-5p	miRNA	MIMAT0004982	Homo sapiens	EIF4A3	protein	9775	Homo sapiens	CLIP-seq	starBase	None	0.5483
RAID03111073	hsa-miR-3620-3p	miRNA	MIMAT0018001	Homo sapiens	DGCR8	protein	54487	Homo sapiens	CLIP-seq	starBase	None	0.5483
RAID03117596	hsa-miR-34a-5p	miRNA	MIMAT0000255	Homo sapiens	RTCB	protein	51493	Homo sapiens	CLIP-seq	starBase	None	0.5483
RAID03119403	mmu-miR-451a	miRNA	MIMAT0001632	Mus musculus	Rbm3	protein	19652	Mus musculus	CLIP-seq	starBase	None	0.5483
RAID03125418	hsa-miR-4683	miRNA	MIMAT0019768	Homo sapiens	IGF2BP3	protein	10643	Homo sapiens	CLIP-seq	starBase	None	0.5483
RAID03126046	hsa-miR-1229-3p	miRNA	MIMAT0005584	Homo sapiens	EIF4A3	protein	9775	Homo sapiens	CLIP-seq	starBase	None	0.5483
RAID03126409	hsa-mir-3605	miRNA	MI0015995	Homo sapiens	EIF4A3	protein	9775	Homo sapiens	CLIP-seq	starBase	None	0.5483
RAID03127398	hsa-miR-144-3p	miRNA	MIMAT0000436	Homo sapiens	LIN28A	protein	79727	Homo sapiens	CLIP-seq	starBase	None	0.5483
RAID03127521	hsa-miR-141-3p	miRNA	MIMAT0000432	Homo sapiens	FUS	protein	2521	Homo sapiens	CLIP-seq	starBase	None	0.5483
RAID03129046	hsa-miR-3664-5p	miRNA	MIMAT0018086	Homo sapiens	DGCR8	protein	54487	Homo sapiens	CLIP-seq	starBase	None	0.5483
RAID03129324	hsa-miR-1343-3p	miRNA	MIMAT0019776	Homo sapiens	DGCR8	protein	54487	Homo sapiens	CLIP-seq	starBase	None	0.5483
RAID03131735	hsa-miR-1226-3p	miRNA	MIMAT0005577	Homo sapiens	EIF4A3	protein	9775	Homo sapiens	CLIP-seq	starBase	None	0.5483
RAID03131915	hsa-mir-4709	miRNA	MI0017342	Homo sapiens	EIF4A3	protein	9775	Homo sapiens	CLIP-seq	starBase	None	0.5483
RAID03133656	hsa-mir-6723	miRNA	MI0022558	Homo sapiens	EWSR1	protein	2130	Homo sapiens	CLIP-seq	starBase	None	0.5483
RAID03134003	hsa-let-7a-3	miRNA	MI0000062	Homo sapiens	LIN28B	protein	389421	Homo sapiens	CLIP-seq	starBase	None	0.5483
RAID03134949	hsa-miR-4647	miRNA	MIMAT0019709	Homo sapiens	LIN28A	protein	79727	Homo sapiens	CLIP-seq	starBase	None	0.5483
RAID03137185	hsa-mir-218-1	miRNA	MI0000294	Homo sapiens	FUS	protein	2521	Homo sapiens	CLIP-seq	starBase	None	0.5483
RAID03137928	hsa-mir-9-2	miRNA	MI0000467	Homo sapiens	DGCR8	protein	54487	Homo sapiens	CLIP-seq	starBase	None	0.5483
RAID03137943	hsa-miR-3177-3p	miRNA	MIMAT0015054	Homo sapiens	IGF2BP1	protein	10642	Homo sapiens	CLIP-seq	starBase	None	0.5483
RAID03137990	hsa-miR-221-3p	miRNA	MIMAT0000278	Homo sapiens	FXR1	protein	8087	Homo sapiens	CLIP-seq	starBase	None	0.5483
RAID03138176	hsa-miR-187-3p	miRNA	MIMAT0000262	Homo sapiens	FUS	protein	2521	Homo sapiens	CLIP-seq	starBase	None	0.5483
RAID03139560	hsa-miR-375	miRNA	MIMAT0000728	Homo sapiens	LIN28B	protein	389421	Homo sapiens	CLIP-seq	starBase	None	0.5483
RAID03139731	hsa-miR-195-5p	miRNA	MIMAT0000461	Homo sapiens	DGCR8	protein	54487	Homo sapiens	CLIP-seq	starBase	None	0.5483
RAID03139778	hsa-miR-3652	miRNA	MIMAT0018072	Homo sapiens	U2AF2	protein	11338	Homo sapiens	CLIP-seq	starBase	None	0.5483
RAID03140893	hsa-miR-421	miRNA	MIMAT0003339	Homo sapiens	EIF4A3	protein	9775	Homo sapiens	CLIP-seq	starBase	None	0.5483
RAID03142708	hsa-miR-1825	miRNA	MIMAT0006765	Homo sapiens	FXR2	protein	9513	Homo sapiens	CLIP-seq	starBase	None	0.5483
RAID03143368	hsa-miR-29c-3p	miRNA	MIMAT0000681	Homo sapiens	FMR1	protein	2332	Homo sapiens	CLIP-seq	starBase	None	0.5483
RAID03149871	hsa-mir-4720	miRNA	MI0017355	Homo sapiens	ZC3H7B	protein	23264	Homo sapiens	CLIP-seq	starBase	None	0.5483
RAID03150189	hsa-miR-17-5p	miRNA	MIMAT0000070	Homo sapiens	U2AF2	protein	11338	Homo sapiens	CLIP-seq	starBase	None	0.5483
RAID03150270	hsa-miR-21-5p	miRNA	MIMAT0000076	Homo sapiens	ZC3H7B	protein	23264	Homo sapiens	CLIP-seq	starBase	None	0.5483
RAID03151328	hsa-let-7f-5p	miRNA	MIMAT0000067	Homo sapiens	LIN28A	protein	79727	Homo sapiens	IP (immunoprecipitation)//EMSA (electrophoretic mobility shift assay)//RT-PCR//Western Blot//CLIP	NPInter//RAID	20178735//22959275//26440890	0.9919
RAID03152492	hsa-miR-23a-3p	miRNA	MIMAT0000078	Homo sapiens	AGO2	protein	27161	Homo sapiens	Northern Blot//IP (immunoprecipitation)	RAID	22844086	0.8808
RAID03154388	hsa-miR-10a-5p	miRNA	MIMAT0000253	Homo sapiens	U2AF2	protein	11338	Homo sapiens	CLIP-seq	starBase	None	0.5483
RAID03154426	hsa-miR-133a-3p	miRNA	MIMAT0000427	Homo sapiens	HLA-G	protein	3135	Homo sapiens	RT-PCR	NPInter	22877943	0.7311
RAID03155780	mmu-miR-328-3p	miRNA	MIMAT0000565	Mus musculus	Fus	protein	233908	Mus musculus	CLIP-seq	starBase	None	0.5483
RAID03156649	hsa-miR-1271-5p	miRNA	MIMAT0005796	Homo sapiens	DGCR8	protein	54487	Homo sapiens	CLIP-seq	starBase	None	0.5483
RAID03157845	hsa-miR-377-3p	miRNA	MIMAT0000730	Homo sapiens	FUS	protein	2521	Homo sapiens	CLIP-seq	starBase	None	0.5483
RAID03158131	hsa-miR-182-5p	miRNA	MIMAT0000259	Homo sapiens	FUS	protein	2521	Homo sapiens	CLIP-seq	starBase	None	0.5483
RAID03158425	hsa-miR-361-5p	miRNA	MIMAT0000703	Homo sapiens	LIN28A	protein	79727	Homo sapiens	CLIP-seq	starBase	None	0.5483
RAID03159085	rno-miR-107-3p	miRNA	MIMAT0000826	Rattus norvegicus	Fadd	protein	266610	Rattus norvegicus	Reporter Assay//RT-PCR//Western Blot	RAID	26038570	0.9526
RAID03163216	hsa-mir-519a-2	miRNA	MI0003182	Homo sapiens	FUS	protein	2521	Homo sapiens	CLIP-seq	starBase	None	0.5483
RAID03164328	hsa-miR-3660	miRNA	MIMAT0018081	Homo sapiens	DGCR8	protein	54487	Homo sapiens	CLIP-seq	starBase	None	0.5483
RAID03165504	hsa-miR-30e-5p	miRNA	MIMAT0000692	Homo sapiens	FMR1	protein	2332	Homo sapiens	CLIP-seq	starBase	None	0.5483
RAID03167272	hsa-mir-92a-2	miRNA	MI0000094	Homo sapiens	FUS	protein	2521	Homo sapiens	CLIP-seq	starBase	None	0.5483
RAID03167408	hsa-mir-199a-1	miRNA	MI0000242	Homo sapiens	EIF4A3	protein	9775	Homo sapiens	CLIP-seq	starBase	None	0.5483
RAID03167434	mmu-mir-9-2	miRNA	MI0000157	Mus musculus	Ptbp2	protein	56195	Mus musculus	CLIP-seq	starBase	None	0.5483
RAID03170137	hsa-miR-495-3p	miRNA	MIMAT0002817	Homo sapiens	FUS	protein	2521	Homo sapiens	CLIP-seq	starBase	None	0.5483
RAID03172444	mmu-mir-29b-2	miRNA	MI0000712	Mus musculus	Fus	protein	233908	Mus musculus	CLIP-seq	starBase	None	0.5483
RAID03174819	hsa-miR-501-5p	miRNA	MIMAT0002872	Homo sapiens	EIF4A3	protein	9775	Homo sapiens	CLIP-seq	starBase	None	0.5483
RAID03175353	hsa-miR-10a-5p	miRNA	MIMAT0000253	Homo sapiens	FUS	protein	2521	Homo sapiens	CLIP-seq	starBase	None	0.5483
RAID03175467	hsa-miR-140-5p	miRNA	MIMAT0000431	Homo sapiens	FUS	protein	2521	Homo sapiens	CLIP-seq	starBase	None	0.5483
RAID03176271	hsa-miR-15b-5p	miRNA	MIMAT0000417	Homo sapiens	PTBP1	protein	5725	Homo sapiens	CLIP-seq	starBase	None	0.5483
RAID03178976	hsa-miR-612	miRNA	MIMAT0003280	Homo sapiens	DGCR8	protein	54487	Homo sapiens	CLIP-seq	starBase	None	0.5483
RAID03179665	hsa-mir-92a-1	miRNA	MI0000093	Homo sapiens	EIF4A3	protein	9775	Homo sapiens	CLIP-seq	starBase	None	0.5483
RAID03180368	hsa-miR-29a-3p	miRNA	MIMAT0000086	Homo sapiens	HNRNPA1	protein	3178	Homo sapiens	IP (immunoprecipitation)//RT-PCR	RAID	26494299	0.8808
RAID03182871	hsa-miR-675-5p	miRNA	MIMAT0004284	Homo sapiens	DGCR8	protein	54487	Homo sapiens	CLIP-seq	starBase	None	0.5483
RAID03183105	hsa-miR-4647	miRNA	MIMAT0019709	Homo sapiens	UPF1	protein	5976	Homo sapiens	CLIP-seq	starBase	None	0.5483
RAID03184928	hsa-miR-32-5p	miRNA	MIMAT0000090	Homo sapiens	DGCR8	protein	54487	Homo sapiens	CLIP-seq	starBase	None	0.5483
RAID03185740	hsa-miR-3136-5p	miRNA	MIMAT0015003	Homo sapiens	DGCR8	protein	54487	Homo sapiens	CLIP-seq	starBase	None	0.5483
RAID03186830	hsa-miR-1293	miRNA	MIMAT0005883	Homo sapiens	EIF4A3	protein	9775	Homo sapiens	CLIP-seq	starBase	None	0.5483
RAID03186857	hsa-miR-4458	miRNA	MIMAT0018980	Homo sapiens	UPF1	protein	5976	Homo sapiens	CLIP-seq	starBase	None	0.5483
[truncated: 522 more rows]
