# Supplementary material for: Predicting lncRNA–Protein Interactions With miRNAs as Mediators in a Heterogeneous Network Model
Source: Front Genet. 2020 Jan 22;10:1341. doi: 10.3389/fgene.2019.01341 (PMC6988623; doi:10.3389/fgene.2019.01341)
Supplement: Table S3 — 40668 experimentally verified lncRNA-protein interactions. [file Table_3.xlsx]

## Sheet: TableS3_LPI_TestingSet
RAID_id	Interactor1	Category1	Id1	Species1	Interactor2	Category2	Id2	Species2	Methods	Databases_source	References	Score
RAID04065772	4732490B19Rik	lncRNA	319871	Mus musculus	Ep300	protein	328572	Mus musculus	ChIP-seq	ChIPBase	None	0.5483
RAID04065785	LINC00271	lncRNA	100131814	Homo sapiens	DGCR8	protein	54487	Homo sapiens	CLIP-seq	starBase	None	0.5483
RAID04065801	Gm6277	lncRNA	621998	Mus musculus	Suz12	protein	52615	Mus musculus	ChIP-seq	ChIPBase	None	0.5483
RAID04065836	MALAT1	lncRNA	378938	Homo sapiens	TMEM184C	protein	55751	Homo sapiens	Microarray//RNA-seq	LncRNA2Target	None	0.6606
RAID04065902	CRNDE	lncRNA	643911	Homo sapiens	PTPRU	protein	10076	Homo sapiens	Microarray//RNA-seq	LncRNA2Target	None	0.6606
RAID04065903	2610020C07Rik	lncRNA	69918	Mus musculus	Rbbp5	protein	213464	Mus musculus	ChIP-seq	ChIPBase	None	0.5483
RAID04065919	PINK1-AS	lncRNA	100861548	Homo sapiens	LIN28A	protein	79727	Homo sapiens	CLIP-seq	starBase	None	0.5483
RAID04065927	Gm15942	lncRNA	105245925	Mus musculus	Cebpa	protein	12606	Mus musculus	ChIP-seq	ChIPBase	None	0.5483
RAID04065962	TUG1	lncRNA	55000	Homo sapiens	STAU2	protein	27067	Homo sapiens	Microarray//RNA-seq	LncRNA2Target	None	0.6606
RAID04066014	MALAT1	lncRNA	378938	Homo sapiens	GALNT5	protein	11227	Homo sapiens	Microarray//RNA-seq	LncRNA2Target	None	0.6606
RAID04066019	G730013B05Rik	lncRNA	619312	Mus musculus	Dlx2	protein	13392	Mus musculus	Microarray//RNA-seq	LncRNA2Target	None	0.6606
RAID04066020	CRNDE	lncRNA	643911	Homo sapiens	METTL25	protein	84190	Homo sapiens	Microarray//RNA-seq	LncRNA2Target	None	0.6606
RAID04066042	4833418N02Rik	lncRNA	74597	Mus musculus	Foxa2	protein	15376	Mus musculus	ChIP-seq	ChIPBase	None	0.5483
RAID04066044	C11orf95	lncRNA	65998	Homo sapiens	IGF2BP1	protein	10642	Homo sapiens	CLIP-seq	starBase	None	0.5483
RAID04066075	ANCR	lncRNA	282	Homo sapiens	SIPA1L2	protein	57568	Homo sapiens	Microarray//RNA-seq	LncRNA2Target	None	0.6606
RAID04066089	LOC647323	lncRNA	647323	Homo sapiens	FOS	protein	2353	Homo sapiens	ChIP-seq	ChIPBase	None	0.5483
RAID04066117	NORAD	lncRNA	647979	Homo sapiens	FMR1	protein	2332	Homo sapiens	CLIP-seq	starBase	None	0.5483
RAID04066158	SOX2-OT	lncRNA	347689	Homo sapiens	CDX2	protein	1045	Homo sapiens	ChIP-seq	ChIPBase	None	0.5483
RAID04066170	FTX	lncRNA	100302692	Homo sapiens	E2F6	protein	1876	Homo sapiens	ChIP-seq	ChIPBase	None	0.5483
RAID04066185	H19	lncRNA	283120	Homo sapiens	COL2A1	protein	1280	Homo sapiens	Western Blot//RT-PCR	LncRNA2Target	20529846	0.8808
RAID04066190	TUG1	lncRNA	55000	Homo sapiens	DNMBP	protein	23268	Homo sapiens	Microarray//RNA-seq	LncRNA2Target	None	0.6606
RAID04066230	4933407K13Rik	lncRNA	74396	Mus musculus	Srsf1	protein	110809	Mus musculus	CLIP-seq	starBase	None	0.5483
RAID04066304	G730013B05Rik	lncRNA	619312	Mus musculus	Als2cl	protein	235633	Mus musculus	Microarray//RNA-seq	LncRNA2Target	None	0.6606
RAID04066317	LINC-ROR	lncRNA	100885779	Homo sapiens	ZEB2	protein	9839	Homo sapiens	Western Blot//RT-PCR	LncRNA2Target	24922071	0.8808
RAID04066351	FGD5-AS1	lncRNA	100505641	Homo sapiens	FMR1	protein	2332	Homo sapiens	CLIP-seq	starBase	None	0.5483
RAID04066356	PCBP3	lncRNA	54039	Homo sapiens	CEBPA	protein	1050	Homo sapiens	ChIP-seq	ChIPBase	None	0.5483
RAID04066403	E530001K10Rik	lncRNA	414123	Mus musculus	Cebpb	protein	12608	Mus musculus	ChIP-seq	ChIPBase	None	0.5483
RAID04066416	G730013B05Rik	lncRNA	619312	Mus musculus	Ticam1	protein	106759	Mus musculus	Microarray//RNA-seq	LncRNA2Target	None	0.6606
RAID04066451	SNHG7	lncRNA	84973	Homo sapiens	PBX3	protein	5090	Homo sapiens	ChIP-seq	ChIPBase	None	0.5483
RAID04066458	OAF	lncRNA	220323	Homo sapiens	MAX	protein	4149	Homo sapiens	ChIP-seq	ChIPBase	None	0.5483
RAID04066460	ANCR	lncRNA	282	Homo sapiens	C15orf48	protein	84419	Homo sapiens	Microarray//RNA-seq	LncRNA2Target	None	0.6606
RAID04066464	G630018N14Rik	lncRNA	414126	Mus musculus	Ctcf	protein	13018	Mus musculus	ChIP-seq	ChIPBase	None	0.5483
RAID04066488	FENDRR	lncRNA	400550	Homo sapiens	AGGF1	protein	55109	Homo sapiens	Microarray//RNA-seq	LncRNA2Target	None	0.6606
RAID04066501	Miat	lncRNA	330166	Mus musculus	Klf4	protein	16600	Mus musculus	Western Blot//RT-PCR	LncRNA2Target	20026622	0.8808
RAID04066525	PSORS1C3	lncRNA	100130889	Homo sapiens	U2AF2	protein	11338	Homo sapiens	CLIP-seq	starBase	None	0.5483
RAID04066530	DMGDH	lncRNA	29958	Homo sapiens	FOSL2	protein	2355	Homo sapiens	ChIP-seq	ChIPBase	None	0.5483
RAID04066557	LOC654342	lncRNA	654342	Homo sapiens	EP300	protein	2033	Homo sapiens	ChIP-seq	ChIPBase	None	0.5483
RAID04066588	MALAT1	lncRNA	378938	Homo sapiens	MIA2	protein	117153	Homo sapiens	Western Blot//RT-PCR	LncRNA2Target	23243023	0.8808
RAID04066628	9930038B18Rik	lncRNA	319503	Mus musculus	Foxa2	protein	15376	Mus musculus	ChIP-seq	ChIPBase	None	0.5483
RAID04066701	Fendrr	lncRNA	68790	Mus musculus	Fam83g	protein	69640	Mus musculus	Microarray//RNA-seq	LncRNA2Target	None	0.6606
RAID04066702	ACAP2-IT1	lncRNA	100874306	Homo sapiens	NFYA	protein	4800	Homo sapiens	ChIP-seq	ChIPBase	None	0.5483
RAID04066717	TUG1	lncRNA	55000	Homo sapiens	PLPPR4	protein	9890	Homo sapiens	Microarray//RNA-seq	LncRNA2Target	None	0.6606
RAID04066730	2610028E06Rik	lncRNA	72395	Mus musculus	Tbx5	protein	21388	Mus musculus	ChIP-seq	ChIPBase	None	0.5483
RAID04066735	TTLL11-IT1	lncRNA	401550	Homo sapiens	E2F6	protein	1876	Homo sapiens	ChIP-seq	ChIPBase	None	0.5483
RAID04066746	MALAT1	lncRNA	378938	Homo sapiens	FOXD4	protein	2298	Homo sapiens	Microarray//RNA-seq	LncRNA2Target	None	0.6606
RAID04066771	CMBL	lncRNA	134147	Homo sapiens	E2F6	protein	1876	Homo sapiens	ChIP-seq	ChIPBase	None	0.5483
RAID04066842	MALAT1	lncRNA	378938	Homo sapiens	ATP6V1B2	protein	526	Homo sapiens	Microarray//RNA-seq	LncRNA2Target	None	0.6606
RAID04066854	5730480H06Rik	lncRNA	70592	Mus musculus	Srsf2	protein	20382	Mus musculus	CLIP-seq	starBase	None	0.5483
RAID04066893	RMST	lncRNA	196475	Homo sapiens	HNF4A	protein	3172	Homo sapiens	ChIP-seq	ChIPBase	None	0.5483
RAID04066966	MIR17HG	lncRNA	407975	Homo sapiens	STAT2	protein	6773	Homo sapiens	ChIP-seq	ChIPBase	None	0.5483
RAID04067015	MALAT1	lncRNA	378938	Homo sapiens	NEDD9	protein	4739	Homo sapiens	Microarray//RNA-seq	LncRNA2Target	None	0.6606
RAID04067026	CRYM-AS1	lncRNA	400508	Homo sapiens	FUS	protein	2521	Homo sapiens	CLIP-seq	starBase	None	0.5483
RAID04067035	FENDRR	lncRNA	400550	Homo sapiens	EIF2AK2	protein	5610	Homo sapiens	Microarray//RNA-seq	LncRNA2Target	None	0.6606
RAID04067050	CRNDE	lncRNA	643911	Homo sapiens	BTAF1	protein	9044	Homo sapiens	Microarray//RNA-seq	LncRNA2Target	None	0.6606
RAID04067081	MINOS1P1	lncRNA	100462953	Homo sapiens	SMARCC2	protein	6601	Homo sapiens	ChIP-seq	ChIPBase	None	0.5483
RAID04067114	CFAP58-AS1	lncRNA	100505869	Homo sapiens	UPF1	protein	5976	Homo sapiens	CLIP-seq	starBase	None	0.5483
RAID04067117	CYP1B1-AS1	lncRNA	285154	Homo sapiens	BCL11A	protein	53335	Homo sapiens	ChIP-seq	ChIPBase	None	0.5483
RAID04067161	FENDRR	lncRNA	400550	Homo sapiens	MAGED1	protein	9500	Homo sapiens	Microarray//RNA-seq	LncRNA2Target	None	0.6606
RAID04067168	Gm17382	lncRNA	102638016	Mus musculus	Gata1	protein	14460	Mus musculus	ChIP-seq	ChIPBase	None	0.5483
RAID04067195	Mir22hg	lncRNA	100042498	Mus musculus	Srsf1	protein	110809	Mus musculus	CLIP-seq	starBase	None	0.5483
RAID04067201	Mirg	lncRNA	100040724	Mus musculus	Fus	protein	233908	Mus musculus	CLIP-seq	starBase	None	0.5483
RAID04067215	HCCAT5	lncRNA	283902	Homo sapiens	HNF4A	protein	3172	Homo sapiens	ChIP-seq	ChIPBase	None	0.5483
RAID04067223	2310026I22Rik	lncRNA	69593	Mus musculus	Esrrb	protein	26380	Mus musculus	ChIP-seq	ChIPBase	None	0.5483
RAID04067224	TUG1	lncRNA	55000	Homo sapiens	TUBD1	protein	51174	Homo sapiens	Microarray//RNA-seq	LncRNA2Target	None	0.6606
RAID04067252	FENDRR	lncRNA	400550	Homo sapiens	E2F7	protein	144455	Homo sapiens	Microarray//RNA-seq	LncRNA2Target	None	0.6606
RAID04067255	1700109G15Rik	lncRNA	78471	Mus musculus	Rcor3	protein	214742	Mus musculus	ChIP-seq	ChIPBase	None	0.5483
RAID04067260	SNHG5	lncRNA	387066	Homo sapiens	CDX2	protein	1045	Homo sapiens	ChIP-seq	ChIPBase	None	0.5483
RAID04067337	FENDRR	lncRNA	400550	Homo sapiens	COL4A1	protein	1282	Homo sapiens	Microarray//RNA-seq	LncRNA2Target	None	0.6606
RAID04067353	WT1-AS	lncRNA	51352	Homo sapiens	SPI1	protein	6688	Homo sapiens	ChIP-seq	ChIPBase	None	0.5483
RAID04067373	4933421O10Rik	lncRNA	100504166	Mus musculus	Fus	protein	233908	Mus musculus	CLIP-seq	starBase	None	0.5483
RAID04067471	FENDRR	lncRNA	400550	Homo sapiens	ZNF507	protein	22847	Homo sapiens	Microarray//RNA-seq	LncRNA2Target	None	0.6606
RAID04067509	KDM5C-IT1	lncRNA	100874299	Homo sapiens	U2AF2	protein	11338	Homo sapiens	CLIP-seq	starBase	None	0.5483
RAID04067546	NKAPP1	lncRNA	158801	Homo sapiens	FOXA1	protein	3169	Homo sapiens	ChIP-seq	ChIPBase	None	0.5483
RAID04067548	FENDRR	lncRNA	400550	Homo sapiens	PSMD3	protein	5709	Homo sapiens	Microarray//RNA-seq	LncRNA2Target	None	0.6606
RAID04067556	LINC00208	lncRNA	83655	Homo sapiens	E2F4	protein	1874	Homo sapiens	ChIP-seq	ChIPBase	None	0.5483
RAID04067614	CSPG4P5	lncRNA	114817	Homo sapiens	FUS	protein	2521	Homo sapiens	CLIP-seq	starBase	None	0.5483
RAID04067654	Kantr	lncRNA	72997	Mus musculus	Cebpb	protein	12608	Mus musculus	ChIP-seq	ChIPBase	None	0.5483
RAID04067674	HIVEP3	lncRNA	59269	Homo sapiens	SMARCB1	protein	6598	Homo sapiens	ChIP-seq	ChIPBase	None	0.5483
RAID04067679	LOC100130992	lncRNA	100130992	Homo sapiens	EBF1	protein	1879	Homo sapiens	ChIP-seq	ChIPBase	None	0.5483
RAID04067684	2310075C17Rik	lncRNA	70194	Mus musculus	Ctcf	protein	13018	Mus musculus	ChIP-seq	ChIPBase	None	0.5483
RAID04067715	Gm13073	lncRNA	105247217	Mus musculus	Foxa2	protein	15376	Mus musculus	ChIP-seq	ChIPBase	None	0.5483
RAID04067732	FENDRR	lncRNA	400550	Homo sapiens	PPP2R5C	protein	5527	Homo sapiens	Microarray//RNA-seq	LncRNA2Target	None	0.6606
RAID04067738	DNAJC3-AS1	lncRNA	100289274	Homo sapiens	NFYB	protein	4801	Homo sapiens	ChIP-seq	ChIPBase	None	0.5483
RAID04067752	LRRC75A-AS1	lncRNA	125144	Homo sapiens	IGF2BP2	protein	10644	Homo sapiens	CLIP-seq	starBase	None	0.5483
RAID04067770	G730013B05Rik	lncRNA	619312	Mus musculus	Pax9	protein	18511	Mus musculus	Microarray//RNA-seq	LncRNA2Target	None	0.6606
RAID04067802	4931403M11Rik	lncRNA	70955	Mus musculus	Ep300	protein	328572	Mus musculus	ChIP-seq	ChIPBase	None	0.5483
RAID04067812	LINC00200	lncRNA	399706	Homo sapiens	TAF1	protein	6872	Homo sapiens	ChIP-seq	ChIPBase	None	0.5483
RAID04067867	CRNDE	lncRNA	643911	Homo sapiens	BABAM1	protein	29086	Homo sapiens	Microarray//RNA-seq	LncRNA2Target	None	0.6606
RAID04067884	CRNDE	lncRNA	643911	Homo sapiens	TMEM64	protein	169200	Homo sapiens	Microarray//RNA-seq	LncRNA2Target	None	0.6606
RAID04067914	TUG1	lncRNA	55000	Homo sapiens	LOC100287896	protein	100287896	Homo sapiens	Microarray//RNA-seq	LncRNA2Target	None	0.6606
RAID04067915	G730013B05Rik	lncRNA	619312	Mus musculus	Cobll1	protein	319876	Mus musculus	Microarray//RNA-seq	LncRNA2Target	None	0.6606
RAID04067918	FENDRR	lncRNA	400550	Homo sapiens	ZSCAN31	protein	64288	Homo sapiens	Microarray//RNA-seq	LncRNA2Target	None	0.6606
RAID04067924	2010015M23Rik	lncRNA	72087	Mus musculus	Zfx	protein	22764	Mus musculus	ChIP-seq	ChIPBase	None	0.5483
RAID04067939	FENDRR	lncRNA	400550	Homo sapiens	CYCS	protein	54205	Homo sapiens	Microarray//RNA-seq	LncRNA2Target	None	0.6606
RAID04067953	LOC389247	lncRNA	389247	Homo sapiens	EBF1	protein	1879	Homo sapiens	ChIP-seq	ChIPBase	None	0.5483
RAID04067971	LOC100272217	lncRNA	100272217	Homo sapiens	CDX2	protein	1045	Homo sapiens	ChIP-seq	ChIPBase	None	0.5483
RAID04067980	LINC00589	lncRNA	619351	Homo sapiens	POU2F2	protein	5452	Homo sapiens	ChIP-seq	ChIPBase	None	0.5483
RAID04067981	SNHG12	lncRNA	85028	Homo sapiens	NR2C2	protein	7182	Homo sapiens	ChIP-seq	ChIPBase	None	0.5483
RAID04068013	BANCR	lncRNA	100885775	Homo sapiens	C7orf69	protein	80099	Homo sapiens	Microarray//RNA-seq	LncRNA2Target	None	0.6606
RAID04068024	MALAT1	lncRNA	378938	Homo sapiens	IRGQ	protein	126298	Homo sapiens	Microarray//RNA-seq	LncRNA2Target	None	0.6606
RAID04068037	1700101I11Rik	lncRNA	100504641	Mus musculus	Foxa2	protein	15376	Mus musculus	ChIP-seq	ChIPBase	None	0.5483
RAID04068130	Epb41l4aos	lncRNA	69749	Mus musculus	Cebpa	protein	12606	Mus musculus	ChIP-seq	ChIPBase	None	0.5483
RAID04068143	G630030J09Rik	lncRNA	442824	Mus musculus	Foxa2	protein	15376	Mus musculus	ChIP-seq	ChIPBase	None	0.5483
RAID04068149	MALAT1	lncRNA	378938	Homo sapiens	CABLES1	protein	91768	Homo sapiens	Microarray//RNA-seq	LncRNA2Target	None	0.6606
RAID04068154	FENDRR	lncRNA	400550	Homo sapiens	BLOC1S6	protein	26258	Homo sapiens	Microarray//RNA-seq	LncRNA2Target	None	0.6606
RAID04068184	PVT1	lncRNA	5820	Homo sapiens	FOXP2	protein	93986	Homo sapiens	ChIP-seq	ChIPBase	None	0.5483
RAID04068226	LOC100130992	lncRNA	100130992	Homo sapiens	AR	protein	367	Homo sapiens	ChIP-seq	ChIPBase	None	0.5483
RAID04068250	AI854703	lncRNA	243373	Mus musculus	Ctcf	protein	13018	Mus musculus	ChIP-seq	ChIPBase	None	0.5483
RAID04068267	MIR3650	lncRNA	100500824	Homo sapiens	E2F4	protein	1874	Homo sapiens	ChIP-seq	ChIPBase	None	0.5483
RAID04068334	FENDRR	lncRNA	400550	Homo sapiens	TGM6	protein	343641	Homo sapiens	Microarray//RNA-seq	LncRNA2Target	None	0.6606
RAID04068345	OLMALINC	lncRNA	90271	Homo sapiens	MYC	protein	4609	Homo sapiens	ChIP-seq	ChIPBase	None	0.5483
RAID04068348	CRNDE	lncRNA	643911	Homo sapiens	BCAT1	protein	586	Homo sapiens	Microarray//RNA-seq	LncRNA2Target	None	0.6606
RAID04068349	Gm11466	lncRNA	102632249	Mus musculus	Klf4	protein	16600	Mus musculus	ChIP-seq	ChIPBase	None	0.5483
RAID04068352	FENDRR	lncRNA	400550	Homo sapiens	ASCC2	protein	84164	Homo sapiens	Microarray//RNA-seq	LncRNA2Target	None	0.6606
RAID04068384	LSINCT5	lncRNA	101234261	Homo sapiens	MAPK9	protein	5601	Homo sapiens	Western Blot//RT-PCR	LncRNA2Target	21532345	0.8808
RAID04068390	Gm16576	lncRNA	100504191	Mus musculus	Srsf1	protein	110809	Mus musculus	CLIP-seq	starBase	None	0.5483
RAID04068455	LOC152225	lncRNA	152225	Homo sapiens	JUN	protein	3725	Homo sapiens	ChIP-seq	ChIPBase	None	0.5483
RAID04068462	SUCLA2-AS1	lncRNA	101929410	Homo sapiens	CDX2	protein	1045	Homo sapiens	ChIP-seq	ChIPBase	None	0.5483
RAID04068470	FAM66C	lncRNA	440078	Homo sapiens	HEY1	protein	23462	Homo sapiens	ChIP-seq	ChIPBase	None	0.5483
RAID04068480	WWTR1-AS1	lncRNA	100128025	Homo sapiens	TCF12	protein	6938	Homo sapiens	ChIP-seq	ChIPBase	None	0.5483
RAID04068491	Platr6	lncRNA	628133	Mus musculus	Rbbp5	protein	213464	Mus musculus	ChIP-seq	ChIPBase	None	0.5483
RAID04068497	TUG1	lncRNA	55000	Homo sapiens	KIF18B	protein	146909	Homo sapiens	Microarray//RNA-seq	LncRNA2Target	None	0.6606
RAID04068499	FENDRR	lncRNA	400550	Homo sapiens	ZSCAN2	protein	54993	Homo sapiens	Microarray//RNA-seq	LncRNA2Target	None	0.6606
RAID04068596	FENDRR	lncRNA	400550	Homo sapiens	CEP89	protein	84902	Homo sapiens	Microarray//RNA-seq	LncRNA2Target	None	0.6606
RAID04068641	CRNDE	lncRNA	643911	Homo sapiens	TOP2A	protein	7153	Homo sapiens	Microarray//RNA-seq	LncRNA2Target	None	0.6606
RAID04068749	2500002B13Rik	lncRNA	78353	Mus musculus	Gata1	protein	14460	Mus musculus	ChIP-seq	ChIPBase	None	0.5483
RAID04068775	ERVK3-1	lncRNA	100507739	Homo sapiens	ERG	protein	2078	Homo sapiens	ChIP-seq	ChIPBase	None	0.5483
RAID04068787	CRNDE	lncRNA	643911	Homo sapiens	CA11	protein	770	Homo sapiens	Microarray//RNA-seq	LncRNA2Target	None	0.6606
RAID04068805	1700007L15Rik	lncRNA	100502742	Mus musculus	Edil3	protein	13612	Mus musculus	Microarray//RNA-seq	LncRNA2Target	None	0.6606
RAID04068807	TUG1	lncRNA	55000	Homo sapiens	ZADH2	protein	284273	Homo sapiens	Microarray//RNA-seq	LncRNA2Target	None	0.6606
RAID04068821	USP12-AS2	lncRNA	100874071	Homo sapiens	TCF7L2	protein	6934	Homo sapiens	ChIP-seq	ChIPBase	None	0.5483
RAID04068866	MALAT1	lncRNA	378938	Homo sapiens	HIST4H4	protein	121504	Homo sapiens	Microarray//RNA-seq	LncRNA2Target	None	0.6606
RAID04068869	TUG1	lncRNA	55000	Homo sapiens	UFM1	protein	51569	Homo sapiens	Microarray//RNA-seq	LncRNA2Target	None	0.6606
RAID04068870	CRNDE	lncRNA	643911	Homo sapiens	TFIP11	protein	24144	Homo sapiens	Microarray//RNA-seq	LncRNA2Target	None	0.6606
RAID04068883	CRNDE	lncRNA	643911	Homo sapiens	ANGPTL4	protein	51129	Homo sapiens	Microarray//RNA-seq	LncRNA2Target	None	0.6606
RAID04068937	CDC42-IT1	lncRNA	100874292	Homo sapiens	U2AF2	protein	11338	Homo sapiens	CLIP-seq	starBase	None	0.5483
RAID04068997	ERVH48-1	lncRNA	90625	Homo sapiens	LIN28A	protein	79727	Homo sapiens	CLIP-seq	starBase	None	0.5483
RAID04068999	1700028E10Rik	lncRNA	625175	Mus musculus	Rbbp5	protein	213464	Mus musculus	ChIP-seq	ChIPBase	None	0.5483
RAID04069008	LOC256880	lncRNA	256880	Homo sapiens	NR3C1	protein	2908	Homo sapiens	ChIP-seq	ChIPBase	None	0.5483
RAID04069009	LINC00668	lncRNA	400643	Homo sapiens	FUS	protein	2521	Homo sapiens	CLIP-seq	starBase	None	0.5483
RAID04069017	GS1-594A7.3	lncRNA	104798195	Homo sapiens	SMARCC2	protein	6601	Homo sapiens	ChIP-seq	ChIPBase	None	0.5483
RAID04069060	4930511A02Rik	lncRNA	74712	Mus musculus	Tbx5	protein	21388	Mus musculus	ChIP-seq	ChIPBase	None	0.5483
RAID04069076	SNHG5	lncRNA	387066	Homo sapiens	DGCR8	protein	54487	Homo sapiens	CLIP-seq	starBase	None	0.5483
RAID04069093	CRNDE	lncRNA	643911	Homo sapiens	RPL11	protein	6135	Homo sapiens	Microarray//RNA-seq	LncRNA2Target	None	0.6606
RAID04069150	LINC00283	lncRNA	100874057	Homo sapiens	DGCR8	protein	54487	Homo sapiens	CLIP-seq	starBase	None	0.5483
RAID04069172	LOC115110	lncRNA	115110	Homo sapiens	MYC	protein	4609	Homo sapiens	ChIP-seq	ChIPBase	None	0.5483
RAID04069213	2610020C07Rik	lncRNA	69918	Mus musculus	Cebpa	protein	12606	Mus musculus	ChIP-seq	ChIPBase	None	0.5483
RAID04069249	ABALON	lncRNA	103021294	Homo sapiens	CASP3	protein	836	Homo sapiens	Western Blot//RT-PCR	LncRNA2Target	24992962	0.8808
RAID04069266	CRNDE	lncRNA	643911	Homo sapiens	GATA6	protein	2627	Homo sapiens	Microarray//ChIP-seq//RNA-seq	ChIPBase//LncRNA2Target	None	0.7144
RAID04069267	2610035F20Rik	lncRNA	69248	Mus musculus	Mtf2	protein	17765	Mus musculus	ChIP-seq	ChIPBase	None	0.5483
RAID04069318	H19	lncRNA	283120	Homo sapiens	AKT1	protein	207	Homo sapiens	RT-PCR	RAID	17786216	0.7311
RAID04069375	RPS10P7	lncRNA	376693	Homo sapiens	LIN28A	protein	79727	Homo sapiens	CLIP-seq	starBase	None	0.5483
RAID04069428	TUG1	lncRNA	55000	Homo sapiens	FGD4	protein	121512	Homo sapiens	Microarray//RNA-seq	LncRNA2Target	None	0.6606
RAID04069433	FENDRR	lncRNA	400550	Homo sapiens	SOAT1	protein	6646	Homo sapiens	Microarray//RNA-seq	LncRNA2Target	None	0.6606
RAID04069471	GS1-278J22.2	lncRNA	105375283	Homo sapiens	CDX2	protein	1045	Homo sapiens	ChIP-seq	ChIPBase	None	0.5483
RAID04069475	5430416O09Rik	lncRNA	71406	Mus musculus	Cebpb	protein	12608	Mus musculus	ChIP-seq	ChIPBase	None	0.5483
RAID04069495	MALAT1	lncRNA	378938	Homo sapiens	LOC100131150	protein	100131150	Homo sapiens	Microarray//RNA-seq	LncRNA2Target	None	0.6606
RAID04069498	VPS11	lncRNA	55823	Homo sapiens	DGCR8	protein	54487	Homo sapiens	CLIP-seq	starBase	None	0.5483
RAID04069513	MALAT1	lncRNA	378938	Homo sapiens	B4GALT7	protein	11285	Homo sapiens	Microarray//RNA-seq	LncRNA2Target	None	0.6606
RAID04069578	G730013B05Rik	lncRNA	619312	Mus musculus	Naa60	protein	74763	Mus musculus	Microarray//RNA-seq	LncRNA2Target	None	0.6606
RAID04069582	FENDRR	lncRNA	400550	Homo sapiens	STK16	protein	8576	Homo sapiens	Microarray//RNA-seq	LncRNA2Target	None	0.6606
RAID04069623	FENDRR	lncRNA	400550	Homo sapiens	MAP2K3	protein	5606	Homo sapiens	Microarray//RNA-seq	LncRNA2Target	None	0.6606
RAID04069646	HCG14	lncRNA	414760	Homo sapiens	SP1	protein	6667	Homo sapiens	ChIP-seq	ChIPBase	None	0.5483
RAID04069818	HCG14	lncRNA	414760	Homo sapiens	FOXH1	protein	8928	Homo sapiens	ChIP-seq	ChIPBase	None	0.5483
RAID04069821	NKAPP1	lncRNA	158801	Homo sapiens	EIF4A3	protein	9775	Homo sapiens	CLIP-seq	starBase	None	0.5483
RAID04069845	SMG7-AS1	lncRNA	284649	Homo sapiens	ELF1	protein	1997	Homo sapiens	ChIP-seq	ChIPBase	None	0.5483
RAID04069876	FENDRR	lncRNA	400550	Homo sapiens	SLC39A9	protein	55334	Homo sapiens	Microarray//RNA-seq	LncRNA2Target	None	0.6606
RAID04069888	MALAT1	lncRNA	378938	Homo sapiens	HNRNPL	protein	3191	Homo sapiens	Microarray//RNA-seq	LncRNA2Target	None	0.6606
RAID04069893	CRNDE	lncRNA	643911	Homo sapiens	RAD50	protein	10111	Homo sapiens	Microarray//RNA-seq	LncRNA2Target	None	0.6606
RAID04069922	CRNDE	lncRNA	643911	Homo sapiens	NAA15	protein	80155	Homo sapiens	Microarray//RNA-seq	LncRNA2Target	None	0.6606
RAID04069933	G730013B05Rik	lncRNA	619312	Mus musculus	Slc2a10	protein	170441	Mus musculus	Microarray//RNA-seq	LncRNA2Target	None	0.6606
RAID04069937	TUG1	lncRNA	55000	Homo sapiens	NFKBIA	protein	4792	Homo sapiens	Microarray//RNA-seq	LncRNA2Target	None	0.6606
RAID04069963	Kirrel3os	lncRNA	442804	Mus musculus	Fus	protein	233908	Mus musculus	CLIP-seq	starBase	None	0.5483
RAID04069988	CCNJL	lncRNA	79616	Homo sapiens	SMARCC1	protein	6599	Homo sapiens	ChIP-seq	ChIPBase	None	0.5483
RAID04069995	Ace3	lncRNA	217246	Mus musculus	Hnf4a	protein	15378	Mus musculus	ChIP-seq	ChIPBase	None	0.5483
RAID04070021	PNKD	lncRNA	25953	Homo sapiens	CDX2	protein	1045	Homo sapiens	ChIP-seq	ChIPBase	None	0.5483
RAID04070024	1110036E04Rik	lncRNA	68697	Mus musculus	Cdx2	protein	12591	Mus musculus	ChIP-seq	ChIPBase	None	0.5483
RAID04070032	D630044L22Rik	lncRNA	240054	Mus musculus	Mtf2	protein	17765	Mus musculus	ChIP-seq	ChIPBase	None	0.5483
RAID04070039	LOC91450	lncRNA	91450	Homo sapiens	TCF12	protein	6938	Homo sapiens	ChIP-seq	ChIPBase	None	0.5483
RAID04070055	FENDRR	lncRNA	400550	Homo sapiens	SDHB	protein	6390	Homo sapiens	Microarray//RNA-seq	LncRNA2Target	None	0.6606
RAID04070070	MALAT1	lncRNA	378938	Homo sapiens	FANCB	protein	2187	Homo sapiens	Microarray//RNA-seq	LncRNA2Target	None	0.6606
RAID04070075	G730013B05Rik	lncRNA	619312	Mus musculus	Zfp607	protein	545938	Mus musculus	Microarray//RNA-seq	LncRNA2Target	None	0.6606
RAID04070087	SLC2A1-AS1	lncRNA	440584	Homo sapiens	PTBP1	protein	5725	Homo sapiens	CLIP-seq	starBase	None	0.5483
RAID04070156	ANCR	lncRNA	282	Homo sapiens	NLRP10	protein	338322	Homo sapiens	Microarray//RNA-seq	LncRNA2Target	None	0.6606
RAID04070181	SCAMP1	lncRNA	9522	Homo sapiens	ZC3H7B	protein	23264	Homo sapiens	CLIP-seq	starBase	None	0.5483
RAID04070211	TUG1	lncRNA	55000	Homo sapiens	NUDT12	protein	83594	Homo sapiens	Microarray//RNA-seq	LncRNA2Target	None	0.6606
RAID04070263	TINCR	lncRNA	257000	Homo sapiens	NEFM	protein	4741	Homo sapiens	Microarray//RNA-seq	LncRNA2Target	None	0.6606
RAID04070267	TUG1	lncRNA	55000	Homo sapiens	C9orf142	protein	286257	Homo sapiens	Microarray//RNA-seq	LncRNA2Target	None	0.6606
RAID04070271	Fendrr	lncRNA	68790	Mus musculus	Adamts1	protein	11504	Mus musculus	Microarray//RNA-seq	LncRNA2Target	None	0.6606
RAID04070274	TUG1	lncRNA	55000	Homo sapiens	FXR1	protein	8087	Homo sapiens	CLIP-seq	starBase	None	0.5483
RAID04070363	TPPP2	lncRNA	122664	Homo sapiens	E2F6	protein	1876	Homo sapiens	ChIP-seq	ChIPBase	None	0.5483
RAID04070447	KCNQ1OT1	lncRNA	10984	Homo sapiens	EHMT2	protein	10919	Homo sapiens	RIP (RNA Immunoprecipitation)//Western Blot	RAID	19571010	0.8808
RAID04070451	LINC01310	lncRNA	100128946	Homo sapiens	MED12	protein	9968	Homo sapiens	ChIP-seq	ChIPBase	None	0.5483
RAID04070456	LINC00111	lncRNA	54090	Homo sapiens	HSF1	protein	3297	Homo sapiens	ChIP-seq	ChIPBase	None	0.5483
RAID04070487	ANKRD44-IT1	lncRNA	101927547	Homo sapiens	PTBP1	protein	5725	Homo sapiens	CLIP-seq	starBase	None	0.5483
RAID04070496	MALAT1	lncRNA	378938	Homo sapiens	SCN7A	protein	6332	Homo sapiens	Microarray//RNA-seq	LncRNA2Target	None	0.6606
RAID04070582	OR7D2	lncRNA	162998	Homo sapiens	ZNF711	protein	7552	Homo sapiens	ChIP-seq	ChIPBase	None	0.5483
RAID04070633	LOC648987	lncRNA	648987	Homo sapiens	E2F1	protein	1869	Homo sapiens	ChIP-seq	ChIPBase	None	0.5483
RAID04070663	CRNDE	lncRNA	643911	Homo sapiens	BPIFB2	protein	80341	Homo sapiens	Microarray//RNA-seq	LncRNA2Target	None	0.6606
RAID04070720	KTN1-AS1	lncRNA	100129075	Homo sapiens	E2F1	protein	1869	Homo sapiens	ChIP-seq	ChIPBase	None	0.5483
RAID04070727	HCG18	lncRNA	414777	Homo sapiens	FOXP2	protein	93986	Homo sapiens	ChIP-seq	ChIPBase	None	0.5483
RAID04070748	LOC729609	lncRNA	729609	Homo sapiens	SMARCC2	protein	6601	Homo sapiens	ChIP-seq	ChIPBase	None	0.5483
RAID04070805	Gm17586	lncRNA	100504040	Mus musculus	E2f4	protein	104394	Mus musculus	ChIP-seq	ChIPBase	None	0.5483
RAID04070807	Bbip1	lncRNA	100503572	Mus musculus	Klf4	protein	16600	Mus musculus	ChIP-seq	ChIPBase	None	0.5483
RAID04070831	RHPN1-AS1	lncRNA	78998	Homo sapiens	NANOG	protein	79923	Homo sapiens	ChIP-seq	ChIPBase	None	0.5483
RAID04070895	FENDRR	lncRNA	400550	Homo sapiens	PFDN2	protein	5202	Homo sapiens	Microarray//RNA-seq	LncRNA2Target	None	0.6606
RAID04070927	FLJ42969	lncRNA	441374	Homo sapiens	NR3C1	protein	2908	Homo sapiens	ChIP-seq	ChIPBase	None	0.5483
RAID04070955	LL0XNC01-116E7.2	lncRNA	100128594	Homo sapiens	MAX	protein	4149	Homo sapiens	ChIP-seq	ChIPBase	None	0.5483
RAID04070958	FENDRR	lncRNA	400550	Homo sapiens	RFNG	protein	5986	Homo sapiens	Microarray//RNA-seq	LncRNA2Target	None	0.6606
RAID04070983	ANCR	lncRNA	282	Homo sapiens	TMEM200B	protein	399474	Homo sapiens	Microarray//RNA-seq	LncRNA2Target	None	0.6606
RAID04070987	9330198N18Rik	lncRNA	77516	Mus musculus	Spi1	protein	20375	Mus musculus	ChIP-seq	ChIPBase	None	0.5483
RAID04070994	TUG1	lncRNA	55000	Homo sapiens	TRANK1	protein	9881	Homo sapiens	Microarray//RNA-seq	LncRNA2Target	None	0.6606
RAID04071007	4930455D15Rik	lncRNA	75795	Mus musculus	Zfx	protein	22764	Mus musculus	ChIP-seq	ChIPBase	None	0.5483
RAID04071011	CRNDE	lncRNA	643911	Homo sapiens	IFI6	protein	2537	Homo sapiens	Microarray//RNA-seq	LncRNA2Target	None	0.6606
RAID04071037	SNX29P2	lncRNA	440352	Homo sapiens	SRSF1	protein	6426	Homo sapiens	CLIP-seq	starBase	None	0.5483
RAID04071097	B930082K07Rik	lncRNA	320947	Mus musculus	E2f4	protein	104394	Mus musculus	ChIP-seq	ChIPBase	None	0.5483
RAID04071131	TUG1	lncRNA	55000	Homo sapiens	ICAM1	protein	3383	Homo sapiens	Microarray//RNA-seq	LncRNA2Target	None	0.6606
RAID04071141	Gm17399	lncRNA	100502695	Mus musculus	E2f4	protein	104394	Mus musculus	ChIP-seq	ChIPBase	None	0.5483
RAID04071147	FENDRR	lncRNA	400550	Homo sapiens	ZFP1	protein	162239	Homo sapiens	Microarray//RNA-seq	LncRNA2Target	None	0.6606
RAID04071159	CRNDE	lncRNA	643911	Homo sapiens	ZNF720	protein	124411	Homo sapiens	Microarray//RNA-seq	LncRNA2Target	None	0.6606
RAID04071160	INGX	lncRNA	27160	Homo sapiens	CDX2	protein	1045	Homo sapiens	ChIP-seq	ChIPBase	None	0.5483
RAID04071166	ABCA17P	lncRNA	650655	Homo sapiens	JUND	protein	3727	Homo sapiens	ChIP-seq	ChIPBase	None	0.5483
RAID04071174	MALAT1	lncRNA	378938	Homo sapiens	MSX2	protein	4488	Homo sapiens	Microarray//RNA-seq	LncRNA2Target	None	0.6606
RAID04071257	FENDRR	lncRNA	400550	Homo sapiens	MX1	protein	4599	Homo sapiens	Microarray//RNA-seq	LncRNA2Target	None	0.6606
RAID04071259	4932435O22Rik	lncRNA	319819	Mus musculus	Wdr5	protein	140858	Mus musculus	ChIP-seq	ChIPBase	None	0.5483
RAID04071267	RHPN1-AS1	lncRNA	78998	Homo sapiens	NFYA	protein	4800	Homo sapiens	ChIP-seq	ChIPBase	None	0.5483
RAID04071310	MALAT1	lncRNA	378938	Homo sapiens	ESAM	protein	90952	Homo sapiens	Microarray//RNA-seq	LncRNA2Target	None	0.6606
RAID04071325	Gm16853	lncRNA	330902	Mus musculus	Ebf1	protein	13591	Mus musculus	ChIP-seq	ChIPBase	None	0.5483
RAID04071401	WT1-AS	lncRNA	51352	Homo sapiens	SMAD4	protein	4089	Homo sapiens	ChIP-seq	ChIPBase	None	0.5483
RAID04071406	TUG1	lncRNA	55000	Homo sapiens	DOK1	protein	1796	Homo sapiens	Microarray//RNA-seq	LncRNA2Target	None	0.6606
RAID04071426	FLJ22447	lncRNA	400221	Homo sapiens	FOXH1	protein	8928	Homo sapiens	ChIP-seq	ChIPBase	None	0.5483
RAID04071445	DKFZP434I0714	lncRNA	54553	Homo sapiens	ETS1	protein	2113	Homo sapiens	ChIP-seq	ChIPBase	None	0.5483
RAID04071463	Gm16677	lncRNA	100504477	Mus musculus	Cebpa	protein	12606	Mus musculus	ChIP-seq	ChIPBase	None	0.5483
RAID04071472	MALAT1	lncRNA	378938	Homo sapiens	TIFA	protein	92610	Homo sapiens	Microarray//RNA-seq	LncRNA2Target	None	0.6606
RAID04071479	GHRHR	lncRNA	2692	Homo sapiens	ERG	protein	2078	Homo sapiens	ChIP-seq	ChIPBase	None	0.5483
RAID04071489	D830044I16Rik	lncRNA	381922	Mus musculus	Rbbp5	protein	213464	Mus musculus	ChIP-seq	ChIPBase	None	0.5483
RAID04071617	CRNDE	lncRNA	643911	Homo sapiens	VNN1	protein	8876	Homo sapiens	Microarray//RNA-seq	LncRNA2Target	None	0.6606
RAID04071634	TFEB	lncRNA	7942	Homo sapiens	HNF4A	protein	3172	Homo sapiens	ChIP-seq	ChIPBase	None	0.5483
RAID04071665	MCF2L-AS1	lncRNA	100289410	Homo sapiens	DGCR8	protein	54487	Homo sapiens	CLIP-seq	starBase	None	0.5483
RAID04071667	4732419C18Rik	lncRNA	100042484	Mus musculus	Sirt1	protein	93759	Mus musculus	ChIP-seq	ChIPBase	None	0.5483
RAID04071692	FENDRR	lncRNA	400550	Homo sapiens	SPATS2	protein	65244	Homo sapiens	Microarray//RNA-seq	LncRNA2Target	None	0.6606
RAID04071730	Gm16675	lncRNA	100503498	Mus musculus	Erg	protein	13876	Mus musculus	ChIP-seq	ChIPBase	None	0.5483
RAID04071804	NDUFB2-AS1	lncRNA	100134713	Homo sapiens	EIF4A3	protein	9775	Homo sapiens	CLIP-seq	starBase	None	0.5483
RAID04071805	1700061J23Rik	lncRNA	76993	Mus musculus	Foxa1	protein	15375	Mus musculus	ChIP-seq	ChIPBase	None	0.5483
RAID04071964	FENDRR	lncRNA	400550	Homo sapiens	TMEM154	protein	201799	Homo sapiens	Microarray//RNA-seq	LncRNA2Target	None	0.6606
RAID04072037	FENDRR	lncRNA	400550	Homo sapiens	TMEM133	protein	83935	Homo sapiens	Microarray//RNA-seq	LncRNA2Target	None	0.6606
RAID04072109	LOC339803	lncRNA	339803	Homo sapiens	NANOG	protein	79923	Homo sapiens	ChIP-seq	ChIPBase	None	0.5483
RAID04072110	ANCR	lncRNA	282	Homo sapiens	KRT16	protein	3868	Homo sapiens	Microarray//RNA-seq	LncRNA2Target	None	0.6606
RAID04072131	2310001H17Rik	lncRNA	76432	Mus musculus	Lmo2	protein	16909	Mus musculus	ChIP-seq	ChIPBase	None	0.5483
RAID04072157	MAFG-AS1	lncRNA	92659	Homo sapiens	EIF4A3	protein	9775	Homo sapiens	CLIP-seq	starBase	None	0.5483
RAID04072164	TUG1	lncRNA	55000	Homo sapiens	UBE2D4	protein	51619	Homo sapiens	Microarray//RNA-seq	LncRNA2Target	None	0.6606
RAID04072168	G730013B05Rik	lncRNA	619312	Mus musculus	Ak3	protein	56248	Mus musculus	Microarray//RNA-seq	LncRNA2Target	None	0.6606
RAID04072216	LOC284578	lncRNA	284578	Homo sapiens	HNF4A	protein	3172	Homo sapiens	ChIP-seq	ChIPBase	None	0.5483
RAID04072271	2310002F09Rik	lncRNA	100504720	Mus musculus	Erg	protein	13876	Mus musculus	ChIP-seq	ChIPBase	None	0.5483
RAID04072276	LINC00475	lncRNA	158314	Homo sapiens	MAX	protein	4149	Homo sapiens	ChIP-seq	ChIPBase	None	0.5483
RAID04072338	ADRA1A	lncRNA	148	Homo sapiens	EP300	protein	2033	Homo sapiens	ChIP-seq	ChIPBase	None	0.5483
RAID04072349	G730013B05Rik	lncRNA	619312	Mus musculus	Cdx2	protein	12591	Mus musculus	Microarray//RNA-seq	LncRNA2Target	None	0.6606
RAID04072351	PVT1	lncRNA	5820	Homo sapiens	MYC	protein	4609	Homo sapiens	ChIP-seq	ChIPBase//ncRDeathDB2.0	24926545	0.5483
RAID04072389	CRNDE	lncRNA	643911	Homo sapiens	CSF3	protein	1440	Homo sapiens	Microarray//RNA-seq	LncRNA2Target	None	0.6606
RAID04072473	G730013B05Rik	lncRNA	619312	Mus musculus	Eras	protein	353283	Mus musculus	Microarray//RNA-seq	LncRNA2Target	None	0.6606
RAID04072532	Gm2093	lncRNA	100039196	Mus musculus	Gata4	protein	14463	Mus musculus	ChIP-seq	ChIPBase	None	0.5483
RAID04072561	LOC728730	lncRNA	728730	Homo sapiens	MYC	protein	4609	Homo sapiens	ChIP-seq	ChIPBase	None	0.5483
RAID04072574	MAPKAPK5-AS1	lncRNA	51275	Homo sapiens	JUN	protein	3725	Homo sapiens	ChIP-seq	ChIPBase	None	0.5483
RAID04072675	LINC00533	lncRNA	387055	Homo sapiens	JUND	protein	3727	Homo sapiens	ChIP-seq	ChIPBase	None	0.5483
RAID04072676	Gm6117	lncRNA	619959	Mus musculus	Lyl1	protein	17095	Mus musculus	ChIP-seq	ChIPBase	None	0.5483
RAID04072682	LINC00852	lncRNA	84657	Homo sapiens	IGF2BP1	protein	10642	Homo sapiens	CLIP-seq	starBase	None	0.5483
RAID04072685	FENDRR	lncRNA	400550	Homo sapiens	FLNC	protein	2318	Homo sapiens	Microarray//RNA-seq	LncRNA2Target	None	0.6606
RAID04072802	1010001N08Rik	lncRNA	68434	Mus musculus	Tbx5	protein	21388	Mus musculus	ChIP-seq	ChIPBase	None	0.5483
RAID04072804	POLDIP2	lncRNA	26073	Homo sapiens	MOV10	protein	4343	Homo sapiens	CLIP-seq	starBase	None	0.5483
RAID04072811	Gm13056	lncRNA	100503810	Mus musculus	Foxa1	protein	15375	Mus musculus	ChIP-seq	ChIPBase	None	0.5483
RAID04072814	FENDRR	lncRNA	400550	Homo sapiens	GTF3C3	protein	9330	Homo sapiens	Microarray//RNA-seq	LncRNA2Target	None	0.6606
RAID04072839	Gm11770	lncRNA	105243647	Mus musculus	Fus	protein	233908	Mus musculus	CLIP-seq	starBase	None	0.5483
RAID04072846	FENDRR	lncRNA	400550	Homo sapiens	MCAT	protein	27349	Homo sapiens	Microarray//RNA-seq	LncRNA2Target	None	0.6606
RAID04072943	Gm17238	lncRNA	100503627	Mus musculus	Gfi1b	protein	14582	Mus musculus	ChIP-seq	ChIPBase	None	0.5483
RAID04072949	5330429C05Rik	lncRNA	78071	Mus musculus	Spi1	protein	20375	Mus musculus	ChIP-seq	ChIPBase	None	0.5483
RAID04072954	FENDRR	lncRNA	400550	Homo sapiens	BCAM	protein	4059	Homo sapiens	Microarray//RNA-seq	LncRNA2Target	None	0.6606
RAID04072968	TUG1	lncRNA	55000	Homo sapiens	PSMC2	protein	5701	Homo sapiens	Microarray//RNA-seq	LncRNA2Target	None	0.6606
RAID04073013	RNY1	lncRNA	6084	Homo sapiens	PTBP1	protein	5725	Homo sapiens	RIP (RNA Immunoprecipitation)//Western Blot//IP (immunoprecipitation)//Northern Blot	RAID	11279198//12096904	0.982
RAID04073015	FENDRR	lncRNA	400550	Homo sapiens	B4GAT1	protein	11041	Homo sapiens	Microarray//RNA-seq	LncRNA2Target	None	0.6606
RAID04073036	MACROD2-IT1	lncRNA	140848	Homo sapiens	MAX	protein	4149	Homo sapiens	ChIP-seq	ChIPBase	None	0.5483
RAID04073060	1700028E10Rik	lncRNA	625175	Mus musculus	Ep300	protein	328572	Mus musculus	ChIP-seq	ChIPBase	None	0.5483
RAID04073104	2410080I02Rik	lncRNA	68248	Mus musculus	Rbbp5	protein	213464	Mus musculus	ChIP-seq	ChIPBase	None	0.5483
RAID04073115	LMO7-AS1	lncRNA	101927155	Homo sapiens	EP300	protein	2033	Homo sapiens	ChIP-seq	ChIPBase	None	0.5483
RAID04073124	SNRPN	lncRNA	6638	Homo sapiens	FOXA1	protein	3169	Homo sapiens	ChIP-seq	ChIPBase	None	0.5483
RAID04073128	GPC5-IT1	lncRNA	100874293	Homo sapiens	SETDB1	protein	9869	Homo sapiens	ChIP-seq	ChIPBase	None	0.5483
RAID04073190	RPL30	lncRNA	6156	Homo sapiens	E2F6	protein	1876	Homo sapiens	ChIP-seq	ChIPBase	None	0.5483
RAID04073201	Gm12718	lncRNA	622167	Mus musculus	Foxa2	protein	15376	Mus musculus	ChIP-seq	ChIPBase	None	0.5483
RAID04073307	ERICH1-AS1	lncRNA	619343	Homo sapiens	FUS	protein	2521	Homo sapiens	CLIP-seq	starBase	None	0.5483
RAID04073354	MALAT1	lncRNA	378938	Homo sapiens	RNMT	protein	8731	Homo sapiens	Microarray//RNA-seq	LncRNA2Target	None	0.6606
RAID04073393	GRM8	lncRNA	2918	Homo sapiens	SPI1	protein	6688	Homo sapiens	ChIP-seq	ChIPBase	None	0.5483
RAID04073406	FENDRR	lncRNA	400550	Homo sapiens	C17orf97	protein	400566	Homo sapiens	Microarray//RNA-seq	LncRNA2Target	None	0.6606
RAID04073456	PTRHD1	lncRNA	391356	Homo sapiens	CDX2	protein	1045	Homo sapiens	ChIP-seq	ChIPBase	None	0.5483
RAID04073491	MALAT1	lncRNA	378938	Homo sapiens	EXO1	protein	9156	Homo sapiens	Microarray//RNA-seq	LncRNA2Target	None	0.6606
RAID04073516	SUZ12P1	lncRNA	440423	Homo sapiens	PBX3	protein	5090	Homo sapiens	ChIP-seq	ChIPBase	None	0.5483
RAID04073544	LINC00518	lncRNA	221718	Homo sapiens	SMARCC1	protein	6599	Homo sapiens	ChIP-seq	ChIPBase	None	0.5483
RAID04073568	ZNRF3-AS1	lncRNA	100874123	Homo sapiens	UPF1	protein	5976	Homo sapiens	CLIP-seq	starBase	None	0.5483
RAID04073640	FAM212B	lncRNA	55924	Homo sapiens	STAT1	protein	6772	Homo sapiens	ChIP-seq	ChIPBase	None	0.5483
RAID04073642	ZBED9	lncRNA	114821	Homo sapiens	HNF4A	protein	3172	Homo sapiens	ChIP-seq	ChIPBase	None	0.5483
RAID04073700	USP46-AS1	lncRNA	643783	Homo sapiens	EIF4A3	protein	9775	Homo sapiens	CLIP-seq	starBase	None	0.5483
RAID04073777	Fendrr	lncRNA	68790	Mus musculus	Rrp8	protein	101867	Mus musculus	Microarray//RNA-seq	LncRNA2Target	None	0.6606
RAID04073830	LINC00476	lncRNA	100128782	Homo sapiens	REST	protein	5978	Homo sapiens	ChIP-seq	ChIPBase	None	0.5483
RAID04073832	C330006A16Rik	lncRNA	109299	Mus musculus	Mycn	protein	18109	Mus musculus	ChIP-seq	ChIPBase	None	0.5483
RAID04073840	LINC00324	lncRNA	284029	Homo sapiens	SIRT6	protein	51548	Homo sapiens	ChIP-seq	ChIPBase	None	0.5483
RAID04073891	LINC00339	lncRNA	29092	Homo sapiens	HEY1	protein	23462	Homo sapiens	ChIP-seq	ChIPBase	None	0.5483
RAID04073892	H19	lncRNA	283120	Homo sapiens	SETDB1	protein	9869	Homo sapiens	ChIP-seq	ChIPBase	None	0.5483
RAID04073895	LINC00641	lncRNA	283624	Homo sapiens	LIN28B	protein	389421	Homo sapiens	CLIP-seq	starBase	None	0.5483
RAID04073901	FENDRR	lncRNA	400550	Homo sapiens	HMGCS1	protein	3157	Homo sapiens	Microarray//RNA-seq	LncRNA2Target	None	0.6606
RAID04073905	ANCR	lncRNA	282	Homo sapiens	TGFBR2	protein	7048	Homo sapiens	Microarray//RNA-seq	LncRNA2Target	None	0.6606
RAID04074012	NAALADL2-AS2	lncRNA	100874244	Homo sapiens	FUS	protein	2521	Homo sapiens	CLIP-seq	starBase	None	0.5483
RAID04074044	3110056K07Rik	lncRNA	73204	Mus musculus	Wdr5	protein	140858	Mus musculus	ChIP-seq	ChIPBase	None	0.5483
RAID04074096	1700071G01Rik	lncRNA	73485	Mus musculus	Spi1	protein	20375	Mus musculus	ChIP-seq	ChIPBase	None	0.5483
RAID04074121	LOC400958	lncRNA	400958	Homo sapiens	BATF	protein	10538	Homo sapiens	ChIP-seq	ChIPBase	None	0.5483
RAID04074127	B930082K07Rik	lncRNA	320947	Mus musculus	Spi1	protein	20375	Mus musculus	ChIP-seq	ChIPBase	None	0.5483
RAID04074215	FENDRR	lncRNA	400550	Homo sapiens	NME5	protein	8382	Homo sapiens	Microarray//RNA-seq	LncRNA2Target	None	0.6606
RAID04074232	FAM53C	lncRNA	51307	Homo sapiens	SRF	protein	6722	Homo sapiens	ChIP-seq	ChIPBase	None	0.5483
RAID04074282	8430436N08Rik	lncRNA	71510	Mus musculus	Cebpa	protein	12606	Mus musculus	ChIP-seq	ChIPBase	None	0.5483
RAID04074386	ANKRD10-IT1	lncRNA	100505494	Homo sapiens	PBX3	protein	5090	Homo sapiens	ChIP-seq	ChIPBase	None	0.5483
RAID04074407	LOC100507391	lncRNA	100507391	Homo sapiens	NANOG	protein	79923	Homo sapiens	ChIP-seq	ChIPBase	None	0.5483
RAID04074426	TUG1	lncRNA	55000	Homo sapiens	RUBCN	protein	9711	Homo sapiens	Microarray//RNA-seq	LncRNA2Target	None	0.6606
RAID04074435	SIK3-IT1	lncRNA	100874315	Homo sapiens	HNRNPC	protein	3183	Homo sapiens	CLIP-seq	starBase	None	0.5483
RAID04074466	Gm13110	lncRNA	102634517	Mus musculus	Fus	protein	233908	Mus musculus	CLIP-seq	starBase	None	0.5483
RAID04074475	FENDRR	lncRNA	400550	Homo sapiens	ADAM23	protein	8745	Homo sapiens	Microarray//RNA-seq	LncRNA2Target	None	0.6606
RAID04074477	BANCR	lncRNA	100885775	Homo sapiens	CCDC27	protein	148870	Homo sapiens	Microarray//RNA-seq	LncRNA2Target	None	0.6606
RAID04074546	Gm16336	lncRNA	100504184	Mus musculus	Fus	protein	233908	Mus musculus	CLIP-seq	starBase	None	0.5483
RAID04074571	THAP9-AS1	lncRNA	100499177	Homo sapiens	U2AF2	protein	11338	Homo sapiens	CLIP-seq	starBase	None	0.5483
RAID04074645	CRNDE	lncRNA	643911	Homo sapiens	AR	protein	367	Homo sapiens	Microarray//ChIP-seq//RNA-seq	ChIPBase//LncRNA2Target	None	0.7144
RAID04074721	Dleu2	lncRNA	668253	Mus musculus	Ctcf	protein	13018	Mus musculus	ChIP-seq	ChIPBase	None	0.5483
RAID04074737	C230035I16Rik	lncRNA	320842	Mus musculus	Spi1	protein	20375	Mus musculus	ChIP-seq	ChIPBase	None	0.5483
RAID04074762	D630024D03Rik	lncRNA	414116	Mus musculus	Cebpb	protein	12608	Mus musculus	ChIP-seq	ChIPBase	None	0.5483
RAID04074783	TUG1	lncRNA	55000	Homo sapiens	PHKA1	protein	5255	Homo sapiens	Microarray//RNA-seq	LncRNA2Target	None	0.6606
RAID04074799	RPL23AP7	lncRNA	118433	Homo sapiens	SRSF1	protein	6426	Homo sapiens	CLIP-seq	starBase	None	0.5483
RAID04074815	SND1-IT1	lncRNA	27099	Homo sapiens	PBX3	protein	5090	Homo sapiens	ChIP-seq	ChIPBase	None	0.5483
RAID04074840	Snhg5	lncRNA	72655	Mus musculus	Cebpb	protein	12608	Mus musculus	ChIP-seq	ChIPBase	None	0.5483
RAID04074844	FENDRR	lncRNA	400550	Homo sapiens	KDM4B	protein	23030	Homo sapiens	Microarray//RNA-seq	LncRNA2Target	None	0.6606
RAID04074849	HCG11	lncRNA	493812	Homo sapiens	MAX	protein	4149	Homo sapiens	ChIP-seq	ChIPBase	None	0.5483
RAID04074916	CRHR1-IT1	lncRNA	147081	Homo sapiens	QKI	protein	9444	Homo sapiens	CLIP-seq	starBase	None	0.5483
RAID04074981	FENDRR	lncRNA	400550	Homo sapiens	CNRIP1	protein	25927	Homo sapiens	Microarray//RNA-seq	LncRNA2Target	None	0.6606
RAID04074993	Gm17494	lncRNA	100503394	Mus musculus	Ctcf	protein	13018	Mus musculus	ChIP-seq	ChIPBase	None	0.5483
RAID04075011	SNHG11	lncRNA	128439	Homo sapiens	SPI1	protein	6688	Homo sapiens	ChIP-seq	ChIPBase	None	0.5483
RAID04075038	LHFPL3-AS1	lncRNA	645591	Homo sapiens	FUS	protein	2521	Homo sapiens	CLIP-seq	starBase	None	0.5483
RAID04075110	FENDRR	lncRNA	400550	Homo sapiens	ZNF600	protein	162966	Homo sapiens	Microarray//RNA-seq	LncRNA2Target	None	0.6606
RAID04075146	TUG1	lncRNA	55000	Homo sapiens	NID2	protein	22795	Homo sapiens	Microarray//RNA-seq	LncRNA2Target	None	0.6606
RAID04075211	MIR210HG	lncRNA	100506211	Homo sapiens	FUS	protein	2521	Homo sapiens	CLIP-seq	starBase	None	0.5483
RAID04075235	4930594M22Rik	lncRNA	654799	Mus musculus	Ezh2	protein	14056	Mus musculus	CLIP-seq	starBase	None	0.5483
RAID04075282	MIR3179-3	lncRNA	100423006	Homo sapiens	ERG	protein	2078	Homo sapiens	ChIP-seq	ChIPBase	None	0.5483
RAID04075333	FENDRR	lncRNA	400550	Homo sapiens	HHAT	protein	55733	Homo sapiens	Microarray//RNA-seq	LncRNA2Target	None	0.6606
RAID04075345	NKAPP1	lncRNA	158801	Homo sapiens	HEY1	protein	23462	Homo sapiens	ChIP-seq	ChIPBase	None	0.5483
RAID04075352	WSPAR	lncRNA	105664404	Homo sapiens	SMARCB1	protein	6598	Homo sapiens	RIP (RNA Immunoprecipitation)//Western Blot//EMSA (electrophoretic mobility shift assay)//RIP-ChIP//ChIP (chromatin immunoprecipitation assay)	RAID	25842979	0.9839
RAID04075442	MALAT1	lncRNA	378938	Homo sapiens	FAM234A	protein	83986	Homo sapiens	Microarray//RNA-seq	LncRNA2Target	None	0.6606
RAID04075457	FENDRR	lncRNA	400550	Homo sapiens	UBXN7	protein	26043	Homo sapiens	Microarray//RNA-seq	LncRNA2Target	None	0.6606
RAID04075475	CIDECP	lncRNA	152302	Homo sapiens	GATA2	protein	2624	Homo sapiens	ChIP-seq	ChIPBase	None	0.5483
RAID04075496	MALAT1	lncRNA	378938	Homo sapiens	DPM1	protein	8813	Homo sapiens	Microarray//RNA-seq	LncRNA2Target	None	0.6606
RAID04075537	TUG1	lncRNA	55000	Homo sapiens	KCNK1	protein	3775	Homo sapiens	Microarray//RNA-seq	LncRNA2Target	None	0.6606
RAID04075567	LINC00304	lncRNA	283860	Homo sapiens	ESRRA	protein	2101	Homo sapiens	ChIP-seq	ChIPBase	None	0.5483
RAID04075647	FENDRR	lncRNA	400550	Homo sapiens	LRRC8D	protein	55144	Homo sapiens	Microarray//RNA-seq	LncRNA2Target	None	0.6606
RAID04075649	JAG1	lncRNA	182	Homo sapiens	DGCR8	protein	54487	Homo sapiens	CLIP-seq	starBase	None	0.5483
RAID04075691	MALAT1	lncRNA	378938	Homo sapiens	PTPRS	protein	5802	Homo sapiens	Microarray//RNA-seq	LncRNA2Target	None	0.6606
RAID04075787	MICAL2	lncRNA	9645	Homo sapiens	HEY1	protein	23462	Homo sapiens	ChIP-seq	ChIPBase	None	0.5483
RAID04075879	D930032P07Rik	lncRNA	320176	Mus musculus	Cebpb	protein	12608	Mus musculus	ChIP-seq	ChIPBase	None	0.5483
RAID04075891	Gm14636	lncRNA	100038616	Mus musculus	Ptbp2	protein	56195	Mus musculus	CLIP-seq	starBase	None	0.5483
RAID04075940	MALAT1	lncRNA	378938	Homo sapiens	OXTR	protein	5021	Homo sapiens	Microarray//RNA-seq	LncRNA2Target	None	0.6606
RAID04075955	CTB-178M22.2	lncRNA	101927862	Homo sapiens	GATA6	protein	2627	Homo sapiens	ChIP-seq	ChIPBase	None	0.5483
RAID04075971	SNHG8	lncRNA	100093630	Homo sapiens	UPF1	protein	5976	Homo sapiens	CLIP-seq	starBase	None	0.5483
RAID04076000	4933405E24Rik	lncRNA	71056	Mus musculus	Cebpa	protein	12606	Mus musculus	ChIP-seq	ChIPBase	None	0.5483
RAID04076021	CRNDE	lncRNA	643911	Homo sapiens	FTSJ3	protein	117246	Homo sapiens	Microarray//RNA-seq	LncRNA2Target	None	0.6606
RAID04076033	FENDRR	lncRNA	400550	Homo sapiens	FDX1L	protein	112812	Homo sapiens	Microarray//RNA-seq	LncRNA2Target	None	0.6606
RAID04076045	FENDRR	lncRNA	400550	Homo sapiens	WDR4	protein	10785	Homo sapiens	Microarray//RNA-seq	LncRNA2Target	None	0.6606
RAID04076047	VTRNA2-1	lncRNA	100126299	Homo sapiens	EIF4A3	protein	9775	Homo sapiens	CLIP-seq	starBase	None	0.5483
RAID04076096	LINC00319	lncRNA	284836	Homo sapiens	ERG	protein	2078	Homo sapiens	ChIP-seq	ChIPBase	None	0.5483
RAID04076100	LINC00163	lncRNA	727699	Homo sapiens	UPF1	protein	5976	Homo sapiens	CLIP-seq	starBase	None	0.5483
RAID04076113	CPS1-IT1	lncRNA	29034	Homo sapiens	E2F6	protein	1876	Homo sapiens	ChIP-seq	ChIPBase	None	0.5483
RAID04076125	FENDRR	lncRNA	400550	Homo sapiens	PCTP	protein	58488	Homo sapiens	Microarray//RNA-seq	LncRNA2Target	None	0.6606
RAID04076151	FENDRR	lncRNA	400550	Homo sapiens	GPX8	protein	493869	Homo sapiens	Microarray//RNA-seq	LncRNA2Target	None	0.6606
RAID04076166	TSSC2	lncRNA	650368	Homo sapiens	AR	protein	367	Homo sapiens	ChIP-seq	ChIPBase	None	0.5483
RAID04076169	BCDIN3D-AS1	lncRNA	100286844	Homo sapiens	FUS	protein	2521	Homo sapiens	CLIP-seq	starBase	None	0.5483
RAID04076174	SND1-IT1	lncRNA	27099	Homo sapiens	NELFE	protein	7936	Homo sapiens	ChIP-seq	ChIPBase	None	0.5483
RAID04076257	TUG1	lncRNA	55000	Homo sapiens	KIF2C	protein	11004	Homo sapiens	Microarray//RNA-seq	LncRNA2Target	None	0.6606
RAID04076304	Gm11527	lncRNA	100040014	Mus musculus	Ep300	protein	328572	Mus musculus	ChIP-seq	ChIPBase	None	0.5483
RAID04076321	DLEU2	lncRNA	8847	Homo sapiens	MYC	protein	4609	Homo sapiens	ChIP-seq	ChIPBase	None	0.5483
RAID04076344	CMBL	lncRNA	134147	Homo sapiens	ZNF263	protein	10127	Homo sapiens	ChIP-seq	ChIPBase	None	0.5483
RAID04076345	FENDRR	lncRNA	400550	Homo sapiens	CSPP1	protein	79848	Homo sapiens	Microarray//RNA-seq	LncRNA2Target	None	0.6606
RAID04076360	Gm4673	lncRNA	100043823	Mus musculus	Zfx	protein	22764	Mus musculus	ChIP-seq	ChIPBase	None	0.5483
RAID04076416	CHODL-AS1	lncRNA	54075	Homo sapiens	SPDEF	protein	25803	Homo sapiens	ChIP-seq	ChIPBase	None	0.5483
RAID04076441	4930471M09Rik	lncRNA	75787	Mus musculus	Cebpb	protein	12608	Mus musculus	ChIP-seq	ChIPBase	None	0.5483
RAID04076494	D830044I16Rik	lncRNA	381922	Mus musculus	Ep300	protein	328572	Mus musculus	ChIP-seq	ChIPBase	None	0.5483
RAID04076514	PAXBP1-AS1	lncRNA	100506215	Homo sapiens	DGCR8	protein	54487	Homo sapiens	CLIP-seq	starBase	None	0.5483
RAID04076584	Gm11691	lncRNA	100038601	Mus musculus	Lmo2	protein	16909	Mus musculus	ChIP-seq	ChIPBase	None	0.5483
RAID04076622	Gm1720	lncRNA	382255	Mus musculus	Cebpb	protein	12608	Mus musculus	ChIP-seq	ChIPBase	None	0.5483
RAID04076674	ERVK3-1	lncRNA	100507739	Homo sapiens	EBF1	protein	1879	Homo sapiens	ChIP-seq	ChIPBase	None	0.5483
RAID04076714	TINCR	lncRNA	257000	Homo sapiens	NUF2	protein	83540	Homo sapiens	Microarray//RNA-seq	LncRNA2Target	None	0.6606
RAID04076717	LOC284950	lncRNA	284950	Homo sapiens	POU2F2	protein	5452	Homo sapiens	ChIP-seq	ChIPBase	None	0.5483
RAID04076723	KIZ	lncRNA	55857	Homo sapiens	U2AF2	protein	11338	Homo sapiens	CLIP-seq	starBase	None	0.5483
RAID04076746	LOC100130899	lncRNA	100130899	Homo sapiens	SPI1	protein	6688	Homo sapiens	ChIP-seq	ChIPBase	None	0.5483
RAID04076807	LOC286177	lncRNA	286177	Homo sapiens	GATA6	protein	2627	Homo sapiens	ChIP-seq	ChIPBase	None	0.5483
RAID04076809	SMA4	lncRNA	11039	Homo sapiens	NANOG	protein	79923	Homo sapiens	ChIP-seq	ChIPBase	None	0.5483
RAID04076862	GLRA3	lncRNA	8001	Homo sapiens	ZZZ3	protein	26009	Homo sapiens	ChIP-seq	ChIPBase	None	0.5483
RAID04076895	DMGDH	lncRNA	29958	Homo sapiens	JUN	protein	3725	Homo sapiens	ChIP-seq	ChIPBase	None	0.5483
RAID04076918	LINC00094	lncRNA	266655	Homo sapiens	EIF4A3	protein	9775	Homo sapiens	CLIP-seq	starBase	None	0.5483
RAID04076923	DLEU1	lncRNA	10301	Homo sapiens	IRF4	protein	3662	Homo sapiens	ChIP-seq	ChIPBase	None	0.5483
RAID04076942	Gm13383	lncRNA	102632086	Mus musculus	Cebpa	protein	12606	Mus musculus	ChIP-seq	ChIPBase	None	0.5483
RAID04076955	SNHG6	lncRNA	641638	Homo sapiens	UPF1	protein	5976	Homo sapiens	CLIP-seq	starBase	None	0.5483
RAID04076983	LINC00595	lncRNA	414243	Homo sapiens	HNF4A	protein	3172	Homo sapiens	ChIP-seq	ChIPBase	None	0.5483
RAID04076988	Fmr1os	lncRNA	100038638	Mus musculus	Spi1	protein	20375	Mus musculus	ChIP-seq	ChIPBase	None	0.5483
RAID04077002	MALAT1	lncRNA	378938	Homo sapiens	KLHL21	protein	9903	Homo sapiens	Microarray//RNA-seq	LncRNA2Target	None	0.6606
RAID04077010	DANCR	lncRNA	57291	Homo sapiens	NFYA	protein	4800	Homo sapiens	ChIP-seq	ChIPBase	None	0.5483
RAID04077033	4833422M21Rik	lncRNA	75768	Mus musculus	Esrrb	protein	26380	Mus musculus	ChIP-seq	ChIPBase	None	0.5483
RAID04077052	Cep83os	lncRNA	67723	Mus musculus	Kdm5a	protein	214899	Mus musculus	ChIP-seq	ChIPBase	None	0.5483
RAID04077115	MALAT1	lncRNA	378938	Homo sapiens	YWHAZ	protein	7534	Homo sapiens	Microarray//RNA-seq	LncRNA2Target	None	0.6606
RAID04077199	LOC441242	lncRNA	441242	Homo sapiens	EBF1	protein	1879	Homo sapiens	ChIP-seq	ChIPBase	None	0.5483
RAID04077202	CLUHP3	lncRNA	100132341	Homo sapiens	SMARCB1	protein	6598	Homo sapiens	ChIP-seq	ChIPBase	None	0.5483
RAID04077213	A930029G22Rik	lncRNA	654806	Mus musculus	E2f4	protein	104394	Mus musculus	ChIP-seq	ChIPBase	None	0.5483
RAID04077215	FLVCR1-AS1	lncRNA	642946	Homo sapiens	E2F1	protein	1869	Homo sapiens	ChIP-seq	ChIPBase	None	0.5483
RAID04077224	LOC100506368	lncRNA	100506368	Homo sapiens	MYC	protein	4609	Homo sapiens	ChIP-seq	ChIPBase	None	0.5483
RAID04077292	HOTAIR	lncRNA	100124700	Homo sapiens	MMP1	protein	4312	Homo sapiens	Western Blot//RT-PCR	LncRNA2Target	23847441	0.8808
RAID04077317	FENDRR	lncRNA	400550	Homo sapiens	GLG1	protein	2734	Homo sapiens	Microarray//RNA-seq	LncRNA2Target	None	0.6606
RAID04077414	SNAI3-AS1	lncRNA	197187	Homo sapiens	DGCR8	protein	54487	Homo sapiens	CLIP-seq	starBase	None	0.5483
RAID04077476	4833413E03Rik	lncRNA	78104	Mus musculus	Gfi1b	protein	14582	Mus musculus	ChIP-seq	ChIPBase	None	0.5483
RAID04077519	GLB1	lncRNA	2720	Homo sapiens	CEBPB	protein	1051	Homo sapiens	ChIP-seq	ChIPBase	None	0.5483
RAID04077525	WWTR1-AS1	lncRNA	100128025	Homo sapiens	EP300	protein	2033	Homo sapiens	ChIP-seq	ChIPBase	None	0.5483
RAID04077539	TUG1	lncRNA	55000	Homo sapiens	LAS1L	protein	81887	Homo sapiens	Microarray//RNA-seq	LncRNA2Target	None	0.6606
RAID04077639	FOXN3-AS2	lncRNA	29018	Homo sapiens	CDX2	protein	1045	Homo sapiens	ChIP-seq	ChIPBase	None	0.5483
RAID04077721	9930038B18Rik	lncRNA	319503	Mus musculus	Rad21	protein	19357	Mus musculus	ChIP-seq	ChIPBase	None	0.5483
RAID04077775	Gm15676	lncRNA	100503974	Mus musculus	Srsf2	protein	20382	Mus musculus	CLIP-seq	starBase	None	0.5483
RAID04077796	TUG1	lncRNA	55000	Homo sapiens	BCAS3	protein	54828	Homo sapiens	Microarray//RNA-seq	LncRNA2Target	None	0.6606
RAID04077824	LOC100132356	lncRNA	100132356	Homo sapiens	NANOG	protein	79923	Homo sapiens	ChIP-seq	ChIPBase	None	0.5483
RAID04077875	9130213A22Rik	lncRNA	100038433	Mus musculus	Srf	protein	20807	Mus musculus	ChIP-seq	ChIPBase	None	0.5483
RAID04077895	Platr22	lncRNA	100503474	Mus musculus	Mycn	protein	18109	Mus musculus	ChIP-seq	ChIPBase	None	0.5483
RAID04077993	FLJ36000	lncRNA	284124	Homo sapiens	NANOG	protein	79923	Homo sapiens	ChIP-seq	ChIPBase	None	0.5483
RAID04077995	ZNF503-AS2	lncRNA	100131213	Homo sapiens	PTBP1	protein	5725	Homo sapiens	CLIP-seq	starBase	None	0.5483
RAID04078010	LINC00324	lncRNA	284029	Homo sapiens	TAF1	protein	6872	Homo sapiens	ChIP-seq	ChIPBase	None	0.5483
RAID04078025	1200007C13Rik	lncRNA	74119	Mus musculus	Erg	protein	13876	Mus musculus	ChIP-seq	ChIPBase	None	0.5483
RAID04078082	GAS5	lncRNA	60674	Homo sapiens	E2F6	protein	1876	Homo sapiens	ChIP-seq	ChIPBase	None	0.5483
RAID04078109	FENDRR	lncRNA	400550	Homo sapiens	NFKBIE	protein	4794	Homo sapiens	Microarray//RNA-seq	LncRNA2Target	None	0.6606
RAID04078185	SCARNA9L	lncRNA	100158262	Homo sapiens	POU2F2	protein	5452	Homo sapiens	ChIP-seq	ChIPBase	None	0.5483
RAID04078218	MALAT1	lncRNA	378938	Homo sapiens	SLC31A2	protein	1318	Homo sapiens	Microarray//RNA-seq	LncRNA2Target	None	0.6606
RAID04078223	HELLPAR	lncRNA	101101692	Homo sapiens	ERBIN	protein	55914	Homo sapiens	RT-PCR	RAID	26173455	0.7311
RAID04078263	NBPF25P	lncRNA	101929780	Homo sapiens	POU2F2	protein	5452	Homo sapiens	ChIP-seq	ChIPBase	None	0.5483
RAID04078291	2810430I11Rik	lncRNA	641385	Mus musculus	Fus	protein	233908	Mus musculus	CLIP-seq	starBase	None	0.5483
RAID04078309	LOC401177	lncRNA	401177	Homo sapiens	HNF4A	protein	3172	Homo sapiens	ChIP-seq	ChIPBase	None	0.5483
RAID04078321	Platr3	lncRNA	102642414	Mus musculus	Lmo2	protein	16909	Mus musculus	ChIP-seq	ChIPBase	None	0.5483
RAID04078332	C130060C02Rik	lncRNA	100502653	Mus musculus	Wdr5	protein	140858	Mus musculus	ChIP-seq	ChIPBase	None	0.5483
RAID04078348	ANP32A	lncRNA	8125	Homo sapiens	MAX	protein	4149	Homo sapiens	ChIP-seq	ChIPBase	None	0.5483
RAID04078361	RERG-AS1	lncRNA	100873980	Homo sapiens	FOS	protein	2353	Homo sapiens	ChIP-seq	ChIPBase	None	0.5483
RAID04078404	A830009L08Rik	lncRNA	320297	Mus musculus	Ctcf	protein	13018	Mus musculus	ChIP-seq	ChIPBase	None	0.5483
RAID04078414	FENDRR	lncRNA	400550	Homo sapiens	SLC6A18	protein	348932	Homo sapiens	Microarray//RNA-seq	LncRNA2Target	None	0.6606
RAID04078441	4930471M09Rik	lncRNA	75787	Mus musculus	E2f1	protein	13555	Mus musculus	ChIP-seq	ChIPBase	None	0.5483
RAID04078493	C430014B12Rik	lncRNA	320829	Mus musculus	Fli1	protein	14247	Mus musculus	ChIP-seq	ChIPBase	None	0.5483
RAID04078496	FENDRR	lncRNA	400550	Homo sapiens	SLC35F3	protein	148641	Homo sapiens	Microarray//RNA-seq	LncRNA2Target	None	0.6606
RAID04078498	LOC100129917	lncRNA	100129917	Homo sapiens	HEY1	protein	23462	Homo sapiens	ChIP-seq	ChIPBase	None	0.5483
RAID04078501	FENDRR	lncRNA	400550	Homo sapiens	GIP	protein	2695	Homo sapiens	Microarray//RNA-seq	LncRNA2Target	None	0.6606
RAID04078550	TUG1	lncRNA	55000	Homo sapiens	KIF14	protein	9928	Homo sapiens	Microarray//RNA-seq	LncRNA2Target	None	0.6606
RAID04078570	TUG1	lncRNA	55000	Homo sapiens	MCM8	protein	84515	Homo sapiens	Microarray//RNA-seq	LncRNA2Target	None	0.6606
RAID04078579	3110045C21Rik	lncRNA	67303	Mus musculus	Cebpa	protein	12606	Mus musculus	ChIP-seq	ChIPBase	None	0.5483
RAID04078597	Pet100	lncRNA	100503890	Mus musculus	Sin3b	protein	20467	Mus musculus	ChIP-seq	ChIPBase	None	0.5483
RAID04078688	Gm10614	lncRNA	100038388	Mus musculus	Srf	protein	20807	Mus musculus	ChIP-seq	ChIPBase	None	0.5483
RAID04078781	FENDRR	lncRNA	400550	Homo sapiens	FBXO6	protein	26270	Homo sapiens	Microarray//RNA-seq	LncRNA2Target	None	0.6606
RAID04078792	C530050E15Rik	lncRNA	320489	Mus musculus	Mtf2	protein	17765	Mus musculus	ChIP-seq	ChIPBase	None	0.5483
RAID04078811	HULC	lncRNA	728655	Homo sapiens	X	protein	944566	Hepatitis B virus	Western Blot//Reporter Assay//RT-PCR//ChIP (chromatin immunoprecipitation assay)	RAID//ViRBase	22685290	0.9786
RAID04078812	ABCA17P	lncRNA	650655	Homo sapiens	SMARCA4	protein	6597	Homo sapiens	ChIP-seq	ChIPBase	None	0.5483
RAID04078835	PIP5K1B	lncRNA	8395	Homo sapiens	MAX	protein	4149	Homo sapiens	ChIP-seq	ChIPBase	None	0.5483
RAID04078861	NEAT1	lncRNA	283131	Homo sapiens	E2F1	protein	1869	Homo sapiens	ChIP-seq	ChIPBase	None	0.5483
RAID04078871	Mir17hg	lncRNA	75957	Mus musculus	Sirt1	protein	93759	Mus musculus	ChIP-seq	ChIPBase	None	0.5483
RAID04078878	2410080I02Rik	lncRNA	68248	Mus musculus	Cebpb	protein	12608	Mus musculus	ChIP-seq	ChIPBase	None	0.5483
RAID04078914	G730013B05Rik	lncRNA	619312	Mus musculus	Rap2a	protein	76108	Mus musculus	Microarray//RNA-seq	LncRNA2Target	None	0.6606
RAID04078994	FGF14-IT1	lncRNA	283480	Homo sapiens	TAF1	protein	6872	Homo sapiens	ChIP-seq	ChIPBase	None	0.5483
RAID04079015	G630030J09Rik	lncRNA	442824	Mus musculus	Rad21	protein	19357	Mus musculus	ChIP-seq	ChIPBase	None	0.5483
RAID04079054	Gm8705	lncRNA	667563	Mus musculus	Mef2a	protein	17258	Mus musculus	ChIP-seq	ChIPBase	None	0.5483
RAID04079095	LINC00662	lncRNA	148189	Homo sapiens	CAPRIN1	protein	4076	Homo sapiens	CLIP-seq	starBase	None	0.5483
RAID04079101	F730035M05Rik	lncRNA	414124	Mus musculus	Foxa2	protein	15376	Mus musculus	ChIP-seq	ChIPBase	None	0.5483
RAID04079141	G730013B05Rik	lncRNA	619312	Mus musculus	Tgm1	protein	21816	Mus musculus	Microarray//RNA-seq	LncRNA2Target	None	0.6606
RAID04079155	LOC388942	lncRNA	388942	Homo sapiens	MYC	protein	4609	Homo sapiens	ChIP-seq	ChIPBase	None	0.5483
RAID04079164	Snhg3	lncRNA	399101	Mus musculus	Srsf1	protein	110809	Mus musculus	CLIP-seq	starBase	None	0.5483
RAID04079335	PVT1	lncRNA	5820	Homo sapiens	SERPINE1	protein	5054	Homo sapiens	Western Blot//RT-PCR	LncRNA2Target	21526116	0.8808
RAID04079372	STK24-AS1	lncRNA	100874069	Homo sapiens	PBX3	protein	5090	Homo sapiens	ChIP-seq	ChIPBase	None	0.5483
RAID04079426	PRKCE	lncRNA	5581	Homo sapiens	HNF4A	protein	3172	Homo sapiens	ChIP-seq	ChIPBase	None	0.5483
RAID04079439	TINCR	lncRNA	257000	Homo sapiens	NEB	protein	4703	Homo sapiens	Microarray//RNA-seq	LncRNA2Target	None	0.6606
RAID04079499	Fendrr	lncRNA	68790	Mus musculus	Alkbh5	protein	268420	Mus musculus	Microarray//RNA-seq	LncRNA2Target	None	0.6606
RAID04079523	LINC00324	lncRNA	284029	Homo sapiens	EP300	protein	2033	Homo sapiens	ChIP-seq	ChIPBase	None	0.5483
RAID04079551	LINC00630	lncRNA	100287765	Homo sapiens	MAX	protein	4149	Homo sapiens	ChIP-seq	ChIPBase	None	0.5483
RAID04079572	SNHG10	lncRNA	283596	Homo sapiens	CDX2	protein	1045	Homo sapiens	ChIP-seq	ChIPBase	None	0.5483
RAID04079596	G730013B05Rik	lncRNA	619312	Mus musculus	Patl2	protein	67578	Mus musculus	Microarray//RNA-seq	LncRNA2Target	None	0.6606
RAID04079633	1700125G22Rik	lncRNA	76657	Mus musculus	Mycn	protein	18109	Mus musculus	ChIP-seq	ChIPBase	None	0.5483
RAID04079675	LOC90246	lncRNA	90246	Homo sapiens	HNF4A	protein	3172	Homo sapiens	ChIP-seq	ChIPBase	None	0.5483
RAID04079712	MEF2C-AS1	lncRNA	101929423	Homo sapiens	FUS	protein	2521	Homo sapiens	CLIP-seq	starBase	None	0.5483
RAID04079771	MALAT1	lncRNA	378938	Homo sapiens	INHBA	protein	3624	Homo sapiens	Microarray//RNA-seq	LncRNA2Target	None	0.6606
RAID04079820	HCG11	lncRNA	493812	Homo sapiens	E2F1	protein	1869	Homo sapiens	ChIP-seq	ChIPBase	None	0.5483
RAID04079833	FENDRR	lncRNA	400550	Homo sapiens	DUS1L	protein	64118	Homo sapiens	Microarray//RNA-seq	LncRNA2Target	None	0.6606
RAID04079893	TMSB15B	lncRNA	286527	Homo sapiens	TAF1	protein	6872	Homo sapiens	ChIP-seq	ChIPBase	None	0.5483
RAID04079971	G730013B05Rik	lncRNA	619312	Mus musculus	Mid1ip1	protein	68041	Mus musculus	Microarray//RNA-seq	LncRNA2Target	None	0.6606
RAID04079984	2610037D02Rik	lncRNA	70040	Mus musculus	Tbx5	protein	21388	Mus musculus	ChIP-seq	ChIPBase	None	0.5483
RAID04080008	1700086O06Rik	lncRNA	73516	Mus musculus	E2f4	protein	104394	Mus musculus	ChIP-seq	ChIPBase	None	0.5483
RAID04080044	4930534D22Rik	lncRNA	78187	Mus musculus	E2f4	protein	104394	Mus musculus	ChIP-seq	ChIPBase	None	0.5483
RAID04080094	FENDRR	lncRNA	400550	Homo sapiens	PDP1	protein	54704	Homo sapiens	Microarray//RNA-seq	LncRNA2Target	None	0.6606
RAID04080148	4933406C10Rik	lncRNA	74076	Mus musculus	Sin3b	protein	20467	Mus musculus	ChIP-seq	ChIPBase	None	0.5483
RAID04080177	SMCR2	lncRNA	105371564	Homo sapiens	E2F6	protein	1876	Homo sapiens	ChIP-seq	ChIPBase	None	0.5483
RAID04080178	PPP1R16A	lncRNA	84988	Homo sapiens	SREBF1	protein	6720	Homo sapiens	ChIP-seq	ChIPBase	None	0.5483
RAID04080225	LINC00112	lncRNA	54089	Homo sapiens	JUN	protein	3725	Homo sapiens	ChIP-seq	ChIPBase	None	0.5483
RAID04080250	FLVCR1-AS1	lncRNA	642946	Homo sapiens	MAX	protein	4149	Homo sapiens	ChIP-seq	ChIPBase	None	0.5483
RAID04080254	TUG1	lncRNA	55000	Homo sapiens	DCAF12	protein	25853	Homo sapiens	Microarray//RNA-seq	LncRNA2Target	None	0.6606
RAID04080259	THSD1P1	lncRNA	374500	Homo sapiens	FOXA1	protein	3169	Homo sapiens	ChIP-seq	ChIPBase	None	0.5483
RAID04080274	FENDRR	lncRNA	400550	Homo sapiens	TRAK1	protein	22906	Homo sapiens	Microarray//RNA-seq	LncRNA2Target	None	0.6606
RAID04080276	AGAP11	lncRNA	119385	Homo sapiens	FMR1	protein	2332	Homo sapiens	CLIP-seq	starBase	None	0.5483
RAID04080298	G730013B05Rik	lncRNA	619312	Mus musculus	Mlec	protein	109154	Mus musculus	Microarray//RNA-seq	LncRNA2Target	None	0.6606
RAID04080306	TUG1	lncRNA	55000	Homo sapiens	PGGT1B	protein	5229	Homo sapiens	Microarray//RNA-seq	LncRNA2Target	None	0.6606
RAID04080315	LOC100288069	lncRNA	100288069	Homo sapiens	TAF1	protein	6872	Homo sapiens	ChIP-seq	ChIPBase	None	0.5483
RAID04080320	CRNDE	lncRNA	643911	Homo sapiens	AP2M1	protein	1173	Homo sapiens	Microarray//RNA-seq	LncRNA2Target	None	0.6606
RAID04080342	CASC2	lncRNA	255082	Homo sapiens	AR	protein	367	Homo sapiens	ChIP-seq	ChIPBase	None	0.5483
RAID04080409	FENDRR	lncRNA	400550	Homo sapiens	ATRIP	protein	84126	Homo sapiens	Microarray//RNA-seq	LncRNA2Target	None	0.6606
RAID04080466	2610037D02Rik	lncRNA	70040	Mus musculus	E2f1	protein	13555	Mus musculus	ChIP-seq	ChIPBase	None	0.5483
RAID04080467	LOC100132356	lncRNA	100132356	Homo sapiens	STAT2	protein	6773	Homo sapiens	ChIP-seq	ChIPBase	None	0.5483
RAID04080484	FENDRR	lncRNA	400550	Homo sapiens	MAMDC2	protein	256691	Homo sapiens	Microarray//RNA-seq	LncRNA2Target	None	0.6606
RAID04080500	Epb41l4aos	lncRNA	69749	Mus musculus	Ctcf	protein	13018	Mus musculus	ChIP-seq	ChIPBase	None	0.5483
RAID04080512	C1QTNF9B-AS1	lncRNA	542767	Homo sapiens	STAT1	protein	6772	Homo sapiens	ChIP-seq	ChIPBase	None	0.5483
RAID04080577	4930480K23Rik	lncRNA	75016	Mus musculus	Foxa2	protein	15376	Mus musculus	ChIP-seq	ChIPBase	None	0.5483
RAID04080701	3110039I08Rik	lncRNA	73144	Mus musculus	Gata4	protein	14463	Mus musculus	ChIP-seq	ChIPBase	None	0.5483
RAID04080764	Gm11527	lncRNA	100040014	Mus musculus	Rbbp5	protein	213464	Mus musculus	ChIP-seq	ChIPBase	None	0.5483
RAID04080829	LMO7-AS1	lncRNA	101927155	Homo sapiens	TCF12	protein	6938	Homo sapiens	ChIP-seq	ChIPBase	None	0.5483
RAID04080836	MALAT1	lncRNA	378938	Homo sapiens	NPM3	protein	10360	Homo sapiens	Microarray//RNA-seq	LncRNA2Target	None	0.6606
RAID04080961	CRNDE	lncRNA	643911	Homo sapiens	DYRK1B	protein	9149	Homo sapiens	Microarray//RNA-seq	LncRNA2Target	None	0.6606
RAID04080967	FENDRR	lncRNA	400550	Homo sapiens	ZNF436	protein	80818	Homo sapiens	Microarray//RNA-seq	LncRNA2Target	None	0.6606
RAID04080986	FENDRR	lncRNA	400550	Homo sapiens	BNIP3L	protein	665	Homo sapiens	Microarray//RNA-seq	LncRNA2Target	None	0.6606
RAID04081000	FENDRR	lncRNA	400550	Homo sapiens	MLN	protein	4295	Homo sapiens	Microarray//RNA-seq	LncRNA2Target	None	0.6606
RAID04081007	BANCR	lncRNA	100885775	Homo sapiens	GAL3ST4	protein	79690	Homo sapiens	Microarray//RNA-seq	LncRNA2Target	None	0.6606
RAID04081028	LINC00114	lncRNA	400866	Homo sapiens	NFYA	protein	4800	Homo sapiens	ChIP-seq	ChIPBase	None	0.5483
RAID04081050	MALAT1	lncRNA	378938	Homo sapiens	PIGQ	protein	9091	Homo sapiens	Microarray//RNA-seq	LncRNA2Target	None	0.6606
RAID04081108	Gm10804	lncRNA	100038525	Mus musculus	Spi1	protein	20375	Mus musculus	ChIP-seq	ChIPBase	None	0.5483
RAID04081188	TUG1	lncRNA	55000	Homo sapiens	TREX1	protein	11277	Homo sapiens	Microarray//RNA-seq	LncRNA2Target	None	0.6606
RAID04081222	JPX	lncRNA	554203	Homo sapiens	U2AF2	protein	11338	Homo sapiens	CLIP-seq	starBase	None	0.5483
RAID04081238	Kcnq1ot1	lncRNA	63830	Mus musculus	Dnmt1	protein	13433	Mus musculus	RIP (RNA Immunoprecipitation)//RT-PCR	LncRNADisease//RAID	20573698//21256239	0.8808
RAID04081244	Gm2529	lncRNA	100039975	Mus musculus	Erg	protein	13876	Mus musculus	ChIP-seq	ChIPBase	None	0.5483
RAID04081252	4833413E03Rik	lncRNA	78104	Mus musculus	Mycn	protein	18109	Mus musculus	ChIP-seq	ChIPBase	None	0.5483
RAID04081267	CRNDE	lncRNA	643911	Homo sapiens	CDKL1	protein	8814	Homo sapiens	Microarray//RNA-seq	LncRNA2Target	None	0.6606
RAID04081321	FENDRR	lncRNA	400550	Homo sapiens	EPHB2	protein	2048	Homo sapiens	Microarray//RNA-seq	LncRNA2Target	None	0.6606
RAID04081394	SNX29P2	lncRNA	440352	Homo sapiens	EIF4A3	protein	9775	Homo sapiens	CLIP-seq	starBase	None	0.5483
RAID04081403	SNHG1	lncRNA	23642	Homo sapiens	RTCB	protein	51493	Homo sapiens	CLIP-seq	starBase	None	0.5483
RAID04081446	FENDRR	lncRNA	400550	Homo sapiens	NUP155	protein	9631	Homo sapiens	Microarray//RNA-seq	LncRNA2Target	None	0.6606
RAID04081530	MGC16025	lncRNA	85009	Homo sapiens	JUN	protein	3725	Homo sapiens	ChIP-seq	ChIPBase	None	0.5483
RAID04081602	TUG1	lncRNA	55000	Homo sapiens	RAB40B	protein	10966	Homo sapiens	Microarray//RNA-seq	LncRNA2Target	None	0.6606
RAID04081604	LOC100134868	lncRNA	100134868	Homo sapiens	STAT1	protein	6772	Homo sapiens	ChIP-seq	ChIPBase	None	0.5483
RAID04081631	DLEU1	lncRNA	10301	Homo sapiens	NFYB	protein	4801	Homo sapiens	ChIP-seq	ChIPBase	None	0.5483
RAID04081646	Gm12992	lncRNA	545681	Mus musculus	Fus	protein	233908	Mus musculus	CLIP-seq	starBase	None	0.5483
RAID04081669	AI854517	lncRNA	101694	Mus musculus	Nkx2-5	protein	18091	Mus musculus	ChIP-seq	ChIPBase	None	0.5483
RAID04081677	1700037F24Rik	lncRNA	73285	Mus musculus	Srf	protein	20807	Mus musculus	ChIP-seq	ChIPBase	None	0.5483
RAID04081684	GRK4	lncRNA	2868	Homo sapiens	FOSL2	protein	2355	Homo sapiens	ChIP-seq	ChIPBase	None	0.5483
RAID04081686	SNHG7	lncRNA	84973	Homo sapiens	AR	protein	367	Homo sapiens	ChIP-seq	ChIPBase	None	0.5483
RAID04081707	MALAT1	lncRNA	378938	Homo sapiens	PARN	protein	5073	Homo sapiens	Microarray//RNA-seq	LncRNA2Target	None	0.6606
RAID04081776	CRNDE	lncRNA	643911	Homo sapiens	JUND	protein	3727	Homo sapiens	ChIP-seq	ChIPBase	None	0.5483
RAID04081782	FENDRR	lncRNA	400550	Homo sapiens	TXNL4B	protein	54957	Homo sapiens	Microarray//RNA-seq	LncRNA2Target	None	0.6606
RAID04081807	6030443J06Rik	lncRNA	320719	Mus musculus	E2f1	protein	13555	Mus musculus	ChIP-seq	ChIPBase	None	0.5483
RAID04081834	CRNDE	lncRNA	643911	Homo sapiens	SGK1	protein	6446	Homo sapiens	Microarray//RNA-seq	LncRNA2Target	None	0.6606
RAID04081838	Platr22	lncRNA	100503474	Mus musculus	Srf	protein	20807	Mus musculus	ChIP-seq	ChIPBase	None	0.5483
RAID04081840	LINC00612	lncRNA	253128	Homo sapiens	ZNF263	protein	10127	Homo sapiens	ChIP-seq	ChIPBase	None	0.5483
RAID04081841	FENDRR	lncRNA	400550	Homo sapiens	KRBOX1	protein	100506243	Homo sapiens	Microarray//RNA-seq	LncRNA2Target	None	0.6606
RAID04081843	A230056P14Rik	lncRNA	320845	Mus musculus	Fus	protein	233908	Mus musculus	CLIP-seq	starBase	None	0.5483
RAID04081858	FENDRR	lncRNA	400550	Homo sapiens	MRPL37	protein	51253	Homo sapiens	Microarray//RNA-seq	LncRNA2Target	None	0.6606
RAID04081948	Gm16160	lncRNA	102636385	Mus musculus	Tbx5	protein	21388	Mus musculus	ChIP-seq	ChIPBase	None	0.5483
RAID04081966	ANKRD10-IT1	lncRNA	100505494	Homo sapiens	STAT2	protein	6773	Homo sapiens	ChIP-seq	ChIPBase	None	0.5483
RAID04082107	Ttc39aos1	lncRNA	102635290	Mus musculus	Nfkb1	protein	18033	Mus musculus	Western Blot//RT-PCR	LncRNA2Target	22155924	0.8808
RAID04082164	Gm10827	lncRNA	100038405	Mus musculus	Sirt1	protein	93759	Mus musculus	ChIP-seq	ChIPBase	None	0.5483
RAID04082165	CRNDE	lncRNA	643911	Homo sapiens	CCDC149	protein	91050	Homo sapiens	Microarray//RNA-seq	LncRNA2Target	None	0.6606
RAID04082176	Gm17399	lncRNA	100502695	Mus musculus	Rbbp5	protein	213464	Mus musculus	ChIP-seq	ChIPBase	None	0.5483
RAID04082209	CRNDE	lncRNA	643911	Homo sapiens	DOCK6	protein	57572	Homo sapiens	Microarray//RNA-seq	LncRNA2Target	None	0.6606
RAID04082227	6430710C18Rik	lncRNA	76218	Mus musculus	Cebpa	protein	12606	Mus musculus	ChIP-seq	ChIPBase	None	0.5483
RAID04082268	G730013B05Rik	lncRNA	619312	Mus musculus	Lpin2	protein	64898	Mus musculus	Microarray//RNA-seq	LncRNA2Target	None	0.6606
RAID04082292	TUG1	lncRNA	55000	Homo sapiens	VANGL1	protein	81839	Homo sapiens	Microarray//RNA-seq	LncRNA2Target	None	0.6606
RAID04082296	MALAT1	lncRNA	378938	Homo sapiens	LMBR1	protein	64327	Homo sapiens	Microarray//RNA-seq	LncRNA2Target	None	0.6606
RAID04082303	TUG1	lncRNA	55000	Homo sapiens	SLC12A8	protein	84561	Homo sapiens	Microarray//RNA-seq	LncRNA2Target	None	0.6606
RAID04082311	XLOC_009911	lncRNA	105500240	Homo sapiens	SMARCC1	protein	6599	Homo sapiens	ChIP-seq	ChIPBase	None	0.5483
RAID04082315	GHRHR	lncRNA	2692	Homo sapiens	IRF4	protein	3662	Homo sapiens	ChIP-seq	ChIPBase	None	0.5483
RAID04082331	MALAT1	lncRNA	378938	Homo sapiens	TAS2R5	protein	54429	Homo sapiens	Microarray//RNA-seq	LncRNA2Target	None	0.6606
RAID04082363	FENDRR	lncRNA	400550	Homo sapiens	COMMD8	protein	54951	Homo sapiens	Microarray//RNA-seq	LncRNA2Target	None	0.6606
RAID04082392	KLHL7-AS1	lncRNA	100775104	Homo sapiens	EIF4A3	protein	9775	Homo sapiens	CLIP-seq	starBase	None	0.5483
RAID04082403	Mkln1os	lncRNA	100503869	Mus musculus	Fus	protein	233908	Mus musculus	CLIP-seq	starBase	None	0.5483
RAID04082474	MYO16-AS2	lncRNA	100874067	Homo sapiens	FOXA1	protein	3169	Homo sapiens	ChIP-seq	ChIPBase	None	0.5483
RAID04082579	FLJ27354	lncRNA	400761	Homo sapiens	E2F4	protein	1874	Homo sapiens	ChIP-seq	ChIPBase	None	0.5483
RAID04082590	G730013B05Rik	lncRNA	619312	Mus musculus	Tmem37	protein	170706	Mus musculus	Microarray//RNA-seq	LncRNA2Target	None	0.6606
RAID04082591	LINC00152	lncRNA	112597	Homo sapiens	EBF1	protein	1879	Homo sapiens	ChIP-seq	ChIPBase	None	0.5483
RAID04082716	CRNDE	lncRNA	643911	Homo sapiens	UBE2L3	protein	7332	Homo sapiens	Microarray//RNA-seq	LncRNA2Target	None	0.6606
RAID04082724	MALAT1	lncRNA	378938	Homo sapiens	MRPS10	protein	55173	Homo sapiens	Microarray//RNA-seq	LncRNA2Target	None	0.6606
RAID04082753	FAM212B	lncRNA	55924	Homo sapiens	TAF1	protein	6872	Homo sapiens	ChIP-seq	ChIPBase	None	0.5483
RAID04082856	LRRC8C	lncRNA	84230	Homo sapiens	SPI1	protein	6688	Homo sapiens	ChIP-seq	ChIPBase	None	0.5483
RAID04082895	B930082K07Rik	lncRNA	320947	Mus musculus	Rbbp5	protein	213464	Mus musculus	ChIP-seq	ChIPBase	None	0.5483
RAID04082901	MAGI1-IT1	lncRNA	151877	Homo sapiens	FUS	protein	2521	Homo sapiens	CLIP-seq	starBase	None	0.5483
RAID04082912	CRNDE	lncRNA	643911	Homo sapiens	SYCE1L	protein	100130958	Homo sapiens	Microarray//RNA-seq	LncRNA2Target	None	0.6606
RAID04082920	HCG18	lncRNA	414777	Homo sapiens	TAF1	protein	6872	Homo sapiens	ChIP-seq	ChIPBase	None	0.5483
RAID04082921	G730013B05Rik	lncRNA	619312	Mus musculus	2310039H08Rik	protein	67101	Mus musculus	Microarray//RNA-seq	LncRNA2Target	None	0.6606
RAID04082924	MIR155HG	lncRNA	114614	Homo sapiens	JUND	protein	3727	Homo sapiens	ChIP-seq	ChIPBase	None	0.5483
RAID04082929	CRNDE	lncRNA	643911	Homo sapiens	YWHAE	protein	7531	Homo sapiens	Microarray//RNA-seq	LncRNA2Target	None	0.6606
RAID04082946	FLVCR1-AS1	lncRNA	642946	Homo sapiens	AR	protein	367	Homo sapiens	ChIP-seq	ChIPBase	None	0.5483
RAID04082962	GHR	lncRNA	2690	Homo sapiens	RAD21	protein	5885	Homo sapiens	ChIP-seq	ChIPBase	None	0.5483
RAID04083026	FENDRR	lncRNA	400550	Homo sapiens	PPCDC	protein	60490	Homo sapiens	Microarray//RNA-seq	LncRNA2Target	None	0.6606
RAID04083049	TUG1	lncRNA	55000	Homo sapiens	GCC2	protein	9648	Homo sapiens	Microarray//RNA-seq	LncRNA2Target	None	0.6606
RAID04083052	FENDRR	lncRNA	400550	Homo sapiens	DVL3	protein	1857	Homo sapiens	Microarray//RNA-seq	LncRNA2Target	None	0.6606
RAID04083070	Snhg4	lncRNA	100503380	Mus musculus	Tbx5	protein	21388	Mus musculus	ChIP-seq	ChIPBase	None	0.5483
RAID04083106	CRNDE	lncRNA	643911	Homo sapiens	PLXND1	protein	23129	Homo sapiens	Microarray//RNA-seq	LncRNA2Target	None	0.6606
RAID04083114	MYC	lncRNA	4609	Homo sapiens	BATF	protein	10538	Homo sapiens	ChIP-seq	ChIPBase	None	0.5483
RAID04083151	MALAT1	lncRNA	378938	Homo sapiens	EFNA5	protein	1946	Homo sapiens	Microarray//RNA-seq	LncRNA2Target	None	0.6606
RAID04083163	CRNDE	lncRNA	643911	Homo sapiens	CLN3	protein	1201	Homo sapiens	Microarray//RNA-seq	LncRNA2Target	None	0.6606
RAID04083170	CRNDE	lncRNA	643911	Homo sapiens	RAB30	protein	27314	Homo sapiens	Microarray//RNA-seq	LncRNA2Target	None	0.6606
RAID04083225	LOC100132356	lncRNA	100132356	Homo sapiens	SMARCC1	protein	6599	Homo sapiens	ChIP-seq	ChIPBase	None	0.5483
RAID04083279	LOC100506368	lncRNA	100506368	Homo sapiens	FOXP2	protein	93986	Homo sapiens	ChIP-seq	ChIPBase	None	0.5483
RAID04083298	CRNDE	lncRNA	643911	Homo sapiens	KIDINS220	protein	57498	Homo sapiens	Microarray//RNA-seq	LncRNA2Target	None	0.6606
RAID04083306	G730013B05Rik	lncRNA	619312	Mus musculus	Shisa5	protein	66940	Mus musculus	Microarray//RNA-seq	LncRNA2Target	None	0.6606
RAID04083308	LOC440028	lncRNA	440028	Homo sapiens	NANOG	protein	79923	Homo sapiens	ChIP-seq	ChIPBase	None	0.5483
RAID04083336	9030407P20Rik	lncRNA	100504389	Mus musculus	Gata4	protein	14463	Mus musculus	ChIP-seq	ChIPBase	None	0.5483
RAID04083372	Snhg4	lncRNA	100503380	Mus musculus	E2f1	protein	13555	Mus musculus	ChIP-seq	ChIPBase	None	0.5483
RAID04083382	DLEU1	lncRNA	10301	Homo sapiens	CEBPA	protein	1050	Homo sapiens	ChIP-seq	ChIPBase	None	0.5483
RAID04083397	HOXA11-AS	lncRNA	221883	Homo sapiens	IGF2BP3	protein	10643	Homo sapiens	CLIP-seq	starBase	None	0.5483
RAID04083399	CASP8AP2	lncRNA	9994	Homo sapiens	IGF2BP1	protein	10642	Homo sapiens	CLIP-seq	starBase	None	0.5483
RAID04083431	FENDRR	lncRNA	400550	Homo sapiens	XPR1	protein	9213	Homo sapiens	Microarray//RNA-seq	LncRNA2Target	None	0.6606
RAID04083460	6820431F20Rik	lncRNA	547150	Mus musculus	Spi1	protein	20375	Mus musculus	ChIP-seq	ChIPBase	None	0.5483
RAID04083490	MALAT1	lncRNA	378938	Homo sapiens	MMP16	protein	4325	Homo sapiens	Microarray//RNA-seq	LncRNA2Target	None	0.6606
RAID04083512	UHRF1	lncRNA	29128	Homo sapiens	PTBP1	protein	5725	Homo sapiens	CLIP-seq	starBase	None	0.5483
RAID04083556	LINC01216	lncRNA	100874275	Homo sapiens	FUS	protein	2521	Homo sapiens	CLIP-seq	starBase	None	0.5483
RAID04083599	G730013B05Rik	lncRNA	619312	Mus musculus	Smyd2	protein	226830	Mus musculus	Microarray//RNA-seq	LncRNA2Target	None	0.6606
RAID04083602	CRNDE	lncRNA	643911	Homo sapiens	TMEM173	protein	340061	Homo sapiens	Microarray//RNA-seq	LncRNA2Target	None	0.6606
RAID04083648	LOC143666	lncRNA	143666	Homo sapiens	STAT1	protein	6772	Homo sapiens	ChIP-seq	ChIPBase	None	0.5483
RAID04083659	Gm17508	lncRNA	100503725	Mus musculus	Tbx5	protein	21388	Mus musculus	ChIP-seq	ChIPBase	None	0.5483
RAID04083684	CTD-3080P12.3	lncRNA	101928857	Homo sapiens	JUND	protein	3727	Homo sapiens	ChIP-seq	ChIPBase	None	0.5483
RAID04083725	LINC00324	lncRNA	284029	Homo sapiens	TCF12	protein	6938	Homo sapiens	ChIP-seq	ChIPBase	None	0.5483
RAID04083809	LOC643770	lncRNA	643770	Homo sapiens	PPARG	protein	5468	Homo sapiens	ChIP-seq	ChIPBase	None	0.5483
RAID04083815	Gm17066	lncRNA	100502987	Mus musculus	Ezh2	protein	14056	Mus musculus	CLIP-seq	starBase	None	0.5483
RAID04083837	FENDRR	lncRNA	400550	Homo sapiens	CYB5D2	protein	124936	Homo sapiens	Microarray//RNA-seq	LncRNA2Target	None	0.6606
RAID04083864	CRNDE	lncRNA	643911	Homo sapiens	WBP2	protein	23558	Homo sapiens	Microarray//RNA-seq	LncRNA2Target	None	0.6606
RAID04083875	SNHG11	lncRNA	128439	Homo sapiens	FMR1	protein	2332	Homo sapiens	CLIP-seq	starBase	None	0.5483
RAID04083949	Gm16576	lncRNA	100504191	Mus musculus	Myb	protein	17863	Mus musculus	ChIP-seq	ChIPBase	None	0.5483
RAID04083982	HCG27	lncRNA	253018	Homo sapiens	STAT1	protein	6772	Homo sapiens	ChIP-seq	ChIPBase	None	0.5483
RAID04083995	FENDRR	lncRNA	400550	Homo sapiens	HYAL2	protein	8692	Homo sapiens	Microarray//RNA-seq	LncRNA2Target	None	0.6606
RAID04084093	MGST3	lncRNA	4259	Homo sapiens	POU5F1	protein	5460	Homo sapiens	ChIP-seq	ChIPBase	None	0.5483
RAID04084165	KIAA0825	lncRNA	285600	Homo sapiens	SPI1	protein	6688	Homo sapiens	ChIP-seq	ChIPBase	None	0.5483
RAID04084172	MALAT1	lncRNA	378938	Homo sapiens	CHIC2	protein	26511	Homo sapiens	Microarray//RNA-seq	LncRNA2Target	None	0.6606
RAID04084237	BACH1-IT2	lncRNA	100874322	Homo sapiens	U2AF2	protein	11338	Homo sapiens	CLIP-seq	starBase	None	0.5483
RAID04084283	FENDRR	lncRNA	400550	Homo sapiens	APLP1	protein	333	Homo sapiens	Microarray//RNA-seq	LncRNA2Target	None	0.6606
RAID04084286	MINOS1P1	lncRNA	100462953	Homo sapiens	SETDB1	protein	9869	Homo sapiens	ChIP-seq	ChIPBase	None	0.5483
RAID04084316	LINC00310	lncRNA	114036	Homo sapiens	POLR3A	protein	11128	Homo sapiens	ChIP-seq	ChIPBase	None	0.5483
RAID04084347	5430405H02Rik	lncRNA	74487	Mus musculus	Srsf2	protein	20382	Mus musculus	CLIP-seq	starBase	None	0.5483
RAID04084349	SLC7A11-AS1	lncRNA	641364	Homo sapiens	FUS	protein	2521	Homo sapiens	CLIP-seq	starBase	None	0.5483
RAID04084377	Gm12589	lncRNA	102631997	Mus musculus	Cebpb	protein	12608	Mus musculus	ChIP-seq	ChIPBase	None	0.5483
RAID04084384	SNHG20	lncRNA	654434	Homo sapiens	MOV10	protein	4343	Homo sapiens	CLIP-seq	starBase	None	0.5483
RAID04084446	CRNDE	lncRNA	643911	Homo sapiens	TGFB2	protein	7042	Homo sapiens	Microarray//RNA-seq	LncRNA2Target	None	0.6606
RAID04084452	JAZF1-AS1	lncRNA	100128081	Homo sapiens	FUS	protein	2521	Homo sapiens	CLIP-seq	starBase	None	0.5483
RAID04084500	LINC00222	lncRNA	387111	Homo sapiens	JUND	protein	3727	Homo sapiens	ChIP-seq	ChIPBase	None	0.5483
RAID04084551	TUG1	lncRNA	55000	Homo sapiens	ZNF91	protein	7644	Homo sapiens	Microarray//RNA-seq	LncRNA2Target	None	0.6606
RAID04084584	CYP1B1-AS1	lncRNA	285154	Homo sapiens	BATF	protein	10538	Homo sapiens	ChIP-seq	ChIPBase	None	0.5483
RAID04084614	NDST1	lncRNA	3340	Homo sapiens	CEBPA	protein	1050	Homo sapiens	ChIP-seq	ChIPBase	None	0.5483
RAID04084637	FLJ42969	lncRNA	441374	Homo sapiens	E2F6	protein	1876	Homo sapiens	ChIP-seq	ChIPBase	None	0.5483
RAID04084671	Gm2694	lncRNA	100040294	Mus musculus	Dcbld2	protein	73379	Mus musculus	Microarray//RNA-seq	LncRNA2Target	None	0.6606
RAID04084707	LOC100272217	lncRNA	100272217	Homo sapiens	TFAP2A	protein	7020	Homo sapiens	ChIP-seq	ChIPBase	None	0.5483
RAID04084747	MGST3	lncRNA	4259	Homo sapiens	NANOG	protein	79923	Homo sapiens	ChIP-seq	ChIPBase	None	0.5483
RAID04084805	WHAMMP3	lncRNA	339005	Homo sapiens	SPI1	protein	6688	Homo sapiens	ChIP-seq	ChIPBase	None	0.5483
RAID04084813	OTUD6B-AS1	lncRNA	100506365	Homo sapiens	TCF7L2	protein	6934	Homo sapiens	ChIP-seq	ChIPBase	None	0.5483
RAID04084828	4930547M16Rik	lncRNA	75299	Mus musculus	Sirt1	protein	93759	Mus musculus	ChIP-seq	ChIPBase	None	0.5483
RAID04084843	CRNDE	lncRNA	643911	Homo sapiens	PDE6B	protein	5158	Homo sapiens	Microarray//RNA-seq	LncRNA2Target	None	0.6606
RAID04084911	SNHG7	lncRNA	84973	Homo sapiens	STAT2	protein	6773	Homo sapiens	ChIP-seq	ChIPBase	None	0.5483
RAID04084996	FENDRR	lncRNA	400550	Homo sapiens	RPN2	protein	6185	Homo sapiens	Microarray//RNA-seq	LncRNA2Target	None	0.6606
RAID04085037	MALAT1	lncRNA	378938	Homo sapiens	MYH10	protein	4628	Homo sapiens	Microarray//RNA-seq	LncRNA2Target	None	0.6606
RAID04085041	FENDRR	lncRNA	400550	Homo sapiens	FGF2	protein	2247	Homo sapiens	Microarray//RNA-seq	LncRNA2Target	None	0.6606
RAID04085055	MIR210HG	lncRNA	100506211	Homo sapiens	GATA6	protein	2627	Homo sapiens	ChIP-seq	ChIPBase	None	0.5483
RAID04085071	MALAT1	lncRNA	378938	Homo sapiens	HUNK	protein	30811	Homo sapiens	Microarray//RNA-seq	LncRNA2Target	None	0.6606
RAID04085079	TUG1	lncRNA	55000	Homo sapiens	CELF1	protein	10658	Homo sapiens	Microarray//RNA-seq	LncRNA2Target	None	0.6606
RAID04085101	FENDRR	lncRNA	400550	Homo sapiens	TAF9B	protein	51616	Homo sapiens	Microarray//RNA-seq	LncRNA2Target	None	0.6606
RAID04085164	6030443J06Rik	lncRNA	320719	Mus musculus	Tbx5	protein	21388	Mus musculus	ChIP-seq	ChIPBase	None	0.5483
RAID04085179	TUG1	lncRNA	55000	Homo sapiens	GPN2	protein	54707	Homo sapiens	Microarray//RNA-seq	LncRNA2Target	None	0.6606
RAID04085180	FENDRR	lncRNA	400550	Homo sapiens	CDV3	protein	55573	Homo sapiens	Microarray//RNA-seq	LncRNA2Target	None	0.6606
RAID04085186	PPARGC1A	lncRNA	10891	Homo sapiens	JUN	protein	3725	Homo sapiens	ChIP-seq	ChIPBase	None	0.5483
RAID04085328	LINC00341	lncRNA	79686	Homo sapiens	EIF4A3	protein	9775	Homo sapiens	CLIP-seq	starBase	None	0.5483
RAID04085360	CFL1P1	lncRNA	142913	Homo sapiens	EBF1	protein	1879	Homo sapiens	ChIP-seq	ChIPBase	None	0.5483
RAID04085385	LINC00111	lncRNA	54090	Homo sapiens	SREBF1	protein	6720	Homo sapiens	ChIP-seq	ChIPBase	None	0.5483
RAID04085449	CRNDE	lncRNA	643911	Homo sapiens	SPOCK1	protein	6695	Homo sapiens	Microarray//RNA-seq	LncRNA2Target	None	0.6606
RAID04085480	SOX21-AS1	lncRNA	100507533	Homo sapiens	SUZ12	protein	23512	Homo sapiens	ChIP-seq	ChIPBase	None	0.5483
RAID04085486	FENDRR	lncRNA	400550	Homo sapiens	KCNE1	protein	3753	Homo sapiens	Microarray//RNA-seq	LncRNA2Target	None	0.6606
RAID04085535	FENDRR	lncRNA	400550	Homo sapiens	TMEM98	protein	26022	Homo sapiens	Microarray//RNA-seq	LncRNA2Target	None	0.6606
RAID04085652	5430405H02Rik	lncRNA	74487	Mus musculus	Srsf1	protein	110809	Mus musculus	CLIP-seq	starBase	None	0.5483
RAID04085707	ERVK3-1	lncRNA	100507739	Homo sapiens	PTBP1	protein	5725	Homo sapiens	CLIP-seq	starBase	None	0.5483
RAID04085720	4930471M09Rik	lncRNA	75787	Mus musculus	Tbx5	protein	21388	Mus musculus	ChIP-seq	ChIPBase	None	0.5483
RAID04085743	SNHG6	lncRNA	641638	Homo sapiens	FMR1	protein	2332	Homo sapiens	CLIP-seq	starBase	None	0.5483
RAID04085750	FLJ42969	lncRNA	441374	Homo sapiens	HNF4A	protein	3172	Homo sapiens	ChIP-seq	ChIPBase	None	0.5483
RAID04085757	TUG1	lncRNA	55000	Homo sapiens	FAM171A1	protein	221061	Homo sapiens	Microarray//RNA-seq	LncRNA2Target	None	0.6606
RAID04085766	MGC16025	lncRNA	85009	Homo sapiens	MED12	protein	9968	Homo sapiens	ChIP-seq	ChIPBase	None	0.5483
RAID04085792	LINC00114	lncRNA	400866	Homo sapiens	EBF1	protein	1879	Homo sapiens	ChIP-seq	ChIPBase	None	0.5483
RAID04085820	A730020E08Rik	lncRNA	100504262	Mus musculus	Mtf2	protein	17765	Mus musculus	ChIP-seq	ChIPBase	None	0.5483
RAID04085878	A330023F24Rik	lncRNA	320977	Mus musculus	Tbx5	protein	21388	Mus musculus	ChIP-seq	ChIPBase	None	0.5483
RAID04085926	FENDRR	lncRNA	400550	Homo sapiens	DNAJA1	protein	3301	Homo sapiens	Microarray//RNA-seq	LncRNA2Target	None	0.6606
RAID04085927	FENDRR	lncRNA	400550	Homo sapiens	UBA52	protein	7311	Homo sapiens	Microarray//RNA-seq	LncRNA2Target	None	0.6606
RAID04085954	TUG1	lncRNA	55000	Homo sapiens	LAMA4	protein	3910	Homo sapiens	Microarray//RNA-seq	LncRNA2Target	None	0.6606
RAID04086040	EMG1	lncRNA	10436	Homo sapiens	ELAVL1	protein	1994	Homo sapiens	CLIP-seq	starBase	None	0.5483
RAID04086064	9330111N05Rik	lncRNA	319983	Mus musculus	E2f4	protein	104394	Mus musculus	ChIP-seq	ChIPBase	None	0.5483
RAID04086093	MALAT1	lncRNA	378938	Homo sapiens	ZNF140	protein	7699	Homo sapiens	Microarray//RNA-seq	LncRNA2Target	None	0.6606
RAID04086130	MALAT1	lncRNA	378938	Homo sapiens	VCAM1	protein	7412	Homo sapiens	Microarray//RNA-seq	LncRNA2Target	None	0.6606
RAID04086146	4931403G20Rik	lncRNA	70934	Mus musculus	Spi1	protein	20375	Mus musculus	ChIP-seq	ChIPBase	None	0.5483
RAID04086196	4930432B10Rik	lncRNA	74619	Mus musculus	Ep300	protein	328572	Mus musculus	ChIP-seq	ChIPBase	None	0.5483
RAID04086202	TUG1	lncRNA	55000	Homo sapiens	TMEM19	protein	55266	Homo sapiens	Microarray//RNA-seq	LncRNA2Target	None	0.6606
RAID04086235	FLJ33534	lncRNA	285150	Homo sapiens	SP1	protein	6667	Homo sapiens	ChIP-seq	ChIPBase	None	0.5483
RAID04086272	PTRHD1	lncRNA	391356	Homo sapiens	EP300	protein	2033	Homo sapiens	ChIP-seq	ChIPBase	None	0.5483
RAID04086281	MALAT1	lncRNA	378938	Homo sapiens	LIG3	protein	3980	Homo sapiens	Microarray//RNA-seq	LncRNA2Target	None	0.6606
RAID04086341	TBC1D3P1-DHX40P1	lncRNA	653645	Homo sapiens	EIF4A3	protein	9775	Homo sapiens	CLIP-seq	starBase	None	0.5483
RAID04086343	LINC00235	lncRNA	64493	Homo sapiens	JUND	protein	3727	Homo sapiens	ChIP-seq	ChIPBase	None	0.5483
RAID04086368	MALAT1	lncRNA	378938	Homo sapiens	LMTK2	protein	22853	Homo sapiens	Microarray//RNA-seq	LncRNA2Target	None	0.6606
RAID04086375	FENDRR	lncRNA	400550	Homo sapiens	TBP	protein	6908	Homo sapiens	Microarray//RNA-seq	LncRNA2Target	None	0.6606
RAID04086403	LINC00526	lncRNA	147525	Homo sapiens	TFAP2A	protein	7020	Homo sapiens	ChIP-seq	ChIPBase	None	0.5483
RAID04086421	LOC100506178	lncRNA	100506178	Homo sapiens	JUN	protein	3725	Homo sapiens	ChIP-seq	ChIPBase	None	0.5483
RAID04086484	LOC100303749	lncRNA	100303749	Homo sapiens	HNF4A	protein	3172	Homo sapiens	ChIP-seq	ChIPBase	None	0.5483
RAID04086500	LOC100129917	lncRNA	100129917	Homo sapiens	FOXA1	protein	3169	Homo sapiens	ChIP-seq	ChIPBase	None	0.5483
RAID04086549	RAI1	lncRNA	10743	Homo sapiens	SMARCA4	protein	6597	Homo sapiens	ChIP-seq	ChIPBase	None	0.5483
RAID04086564	ZNF664	lncRNA	144348	Homo sapiens	EBF1	protein	1879	Homo sapiens	ChIP-seq	ChIPBase	None	0.5483
RAID04086592	DSCR9	lncRNA	257203	Homo sapiens	BCL11A	protein	53335	Homo sapiens	ChIP-seq	ChIPBase	None	0.5483
RAID04086596	Gm2449	lncRNA	100039837	Mus musculus	Foxa2	protein	15376	Mus musculus	ChIP-seq	ChIPBase	None	0.5483
RAID04086603	FENDRR	lncRNA	400550	Homo sapiens	DCK	protein	1633	Homo sapiens	Microarray//RNA-seq	LncRNA2Target	None	0.6606
RAID04086692	G630030J09Rik	lncRNA	442824	Mus musculus	Ctcf	protein	13018	Mus musculus	ChIP-seq	ChIPBase	None	0.5483
RAID04086724	C030014I23Rik	lncRNA	77381	Mus musculus	Gata4	protein	14463	Mus musculus	ChIP-seq	ChIPBase	None	0.5483
RAID04086795	BANCR	lncRNA	100885775	Homo sapiens	C11orf45	protein	219833	Homo sapiens	Microarray//RNA-seq	LncRNA2Target	None	0.6606
RAID04086808	4930596I21Rik	lncRNA	78229	Mus musculus	Fus	protein	233908	Mus musculus	CLIP-seq	starBase	None	0.5483
RAID04086822	CRHR1-IT1	lncRNA	147081	Homo sapiens	FUS	protein	2521	Homo sapiens	CLIP-seq	starBase	None	0.5483
RAID04086826	A330023F24Rik	lncRNA	320977	Mus musculus	Gfi1b	protein	14582	Mus musculus	ChIP-seq	ChIPBase	None	0.5483
RAID04086859	CYP1B1-AS1	lncRNA	285154	Homo sapiens	LIN28B	protein	389421	Homo sapiens	CLIP-seq	starBase	None	0.5483
RAID04086863	LINC01187	lncRNA	100507267	Homo sapiens	FOXH1	protein	8928	Homo sapiens	ChIP-seq	ChIPBase	None	0.5483
RAID04086881	CTD-2194D22.4	lncRNA	101929081	Homo sapiens	SUZ12	protein	23512	Homo sapiens	ChIP-seq	ChIPBase	None	0.5483
RAID04086895	PYY2	lncRNA	23615	Homo sapiens	U2AF2	protein	11338	Homo sapiens	CLIP-seq	starBase	None	0.5483
RAID04086915	CRNDE	lncRNA	643911	Homo sapiens	SF3B4	protein	10262	Homo sapiens	Microarray//RNA-seq	LncRNA2Target	None	0.6606
RAID04086989	TUG1	lncRNA	55000	Homo sapiens	TRPC6	protein	7225	Homo sapiens	Microarray//RNA-seq	LncRNA2Target	None	0.6606
RAID04086996	6230400D17Rik	lncRNA	76133	Mus musculus	Esrrb	protein	26380	Mus musculus	ChIP-seq	ChIPBase	None	0.5483
RAID04087006	LOC284080	lncRNA	284080	Homo sapiens	IRF4	protein	3662	Homo sapiens	ChIP-seq	ChIPBase	None	0.5483
RAID04087033	TINCR	lncRNA	257000	Homo sapiens	EPCAM	protein	4072	Homo sapiens	Microarray//RNA-seq	LncRNA2Target	None	0.6606
RAID04087050	SNHG7	lncRNA	84973	Homo sapiens	ZBTB33	protein	10009	Homo sapiens	ChIP-seq	ChIPBase	None	0.5483
RAID04087090	FENDRR	lncRNA	400550	Homo sapiens	DLG5	protein	9231	Homo sapiens	Microarray//RNA-seq	LncRNA2Target	None	0.6606
RAID04087109	CRNDE	lncRNA	643911	Homo sapiens	SDAD1	protein	55153	Homo sapiens	Microarray//RNA-seq	LncRNA2Target	None	0.6606
RAID04087137	DIRC3	lncRNA	729582	Homo sapiens	BCL11A	protein	53335	Homo sapiens	ChIP-seq	ChIPBase	None	0.5483
RAID04087139	TUG1	lncRNA	55000	Homo sapiens	PHTF2	protein	57157	Homo sapiens	Microarray//RNA-seq	LncRNA2Target	None	0.6606
RAID04087258	TFEB	lncRNA	7942	Homo sapiens	POU5F1	protein	5460	Homo sapiens	ChIP-seq	ChIPBase	None	0.5483
RAID04087275	CRNDE	lncRNA	643911	Homo sapiens	LIMS1	protein	3987	Homo sapiens	Microarray//RNA-seq	LncRNA2Target	None	0.6606
RAID04087338	MALAT1	lncRNA	378938	Homo sapiens	DBNL	protein	28988	Homo sapiens	Microarray//RNA-seq	LncRNA2Target	None	0.6606
RAID04087385	Gm17733	lncRNA	100503783	Mus musculus	Esrrb	protein	26380	Mus musculus	ChIP-seq	ChIPBase	None	0.5483
RAID04087386	G730013B05Rik	lncRNA	619312	Mus musculus	Cd2ap	protein	12488	Mus musculus	Microarray//RNA-seq	LncRNA2Target	None	0.6606
RAID04087389	TUG1	lncRNA	55000	Homo sapiens	EXTL2	protein	2135	Homo sapiens	Microarray//RNA-seq	LncRNA2Target	None	0.6606
RAID04087392	MALAT1	lncRNA	378938	Homo sapiens	TRMT2B	protein	79979	Homo sapiens	Microarray//RNA-seq	LncRNA2Target	None	0.6606
RAID04087398	AI480526	lncRNA	100675	Mus musculus	Klf4	protein	16600	Mus musculus	ChIP-seq	ChIPBase	None	0.5483
RAID04087459	LINC00240	lncRNA	100133205	Homo sapiens	POU2F2	protein	5452	Homo sapiens	ChIP-seq	ChIPBase	None	0.5483
RAID04087500	THSD1P1	lncRNA	374500	Homo sapiens	JUN	protein	3725	Homo sapiens	ChIP-seq	ChIPBase	None	0.5483
RAID04087536	Gm16160	lncRNA	102636385	Mus musculus	Sirt1	protein	93759	Mus musculus	ChIP-seq	ChIPBase	None	0.5483
RAID04087572	LOC100270746	lncRNA	100270746	Homo sapiens	EP300	protein	2033	Homo sapiens	ChIP-seq	ChIPBase	None	0.5483
RAID04087573	TUG1	lncRNA	55000	Homo sapiens	LIN28B	protein	389421	Homo sapiens	CLIP-seq	starBase	None	0.5483
RAID04087591	LOC100505782	lncRNA	100505782	Homo sapiens	TCF7L2	protein	6934	Homo sapiens	ChIP-seq	ChIPBase	None	0.5483
RAID04087663	MAL2	lncRNA	114569	Homo sapiens	EIF4A3	protein	9775	Homo sapiens	CLIP-seq	starBase	None	0.5483
RAID04087689	THSD1P1	lncRNA	374500	Homo sapiens	JUND	protein	3727	Homo sapiens	ChIP-seq	ChIPBase	None	0.5483
RAID04087731	LINC00159	lncRNA	100551499	Homo sapiens	ZNF263	protein	10127	Homo sapiens	ChIP-seq	ChIPBase	None	0.5483
RAID04087735	PVT1	lncRNA	5820	Homo sapiens	SMARCC2	protein	6601	Homo sapiens	ChIP-seq	ChIPBase	None	0.5483
RAID04087759	FENDRR	lncRNA	400550	Homo sapiens	PTDSS1	protein	9791	Homo sapiens	Microarray//RNA-seq	LncRNA2Target	None	0.6606
RAID04087760	STAMBPL1	lncRNA	57559	Homo sapiens	SMARCC2	protein	6601	Homo sapiens	ChIP-seq	ChIPBase	None	0.5483
RAID04087829	CRNDE	lncRNA	643911	Homo sapiens	PER2	protein	8864	Homo sapiens	Microarray//RNA-seq	LncRNA2Target	None	0.6606
RAID04087849	FENDRR	lncRNA	400550	Homo sapiens	TSPAN12	protein	23554	Homo sapiens	Microarray//RNA-seq	LncRNA2Target	None	0.6606
RAID04087854	SNHG15	lncRNA	285958	Homo sapiens	UPF1	protein	5976	Homo sapiens	CLIP-seq	starBase	None	0.5483
RAID04087863	TUG1	lncRNA	55000	Homo sapiens	MKNK2	protein	2872	Homo sapiens	Microarray//RNA-seq	LncRNA2Target	None	0.6606
RAID04087958	PPP1R9B	lncRNA	84687	Homo sapiens	IGF2BP3	protein	10643	Homo sapiens	CLIP-seq	starBase	None	0.5483
RAID04087967	MALAT1	lncRNA	378938	Homo sapiens	LOC100129974	protein	100129974	Homo sapiens	Microarray//RNA-seq	LncRNA2Target	None	0.6606
RAID04087987	LINC00324	lncRNA	284029	Homo sapiens	LIN28B	protein	389421	Homo sapiens	CLIP-seq	starBase	None	0.5483
RAID04088039	LOC283683	lncRNA	283683	Homo sapiens	E2F6	protein	1876	Homo sapiens	ChIP-seq	ChIPBase	None	0.5483
RAID04088099	MIR17HG	lncRNA	407975	Homo sapiens	TAF1	protein	6872	Homo sapiens	ChIP-seq	ChIPBase	None	0.5483
RAID04088114	CRNDE	lncRNA	643911	Homo sapiens	ARF1	protein	375	Homo sapiens	Microarray//RNA-seq	LncRNA2Target	None	0.6606
RAID04088144	MALAT1	lncRNA	378938	Homo sapiens	VAT1L	protein	57687	Homo sapiens	Microarray//RNA-seq	LncRNA2Target	None	0.6606
RAID04088148	LINC00337	lncRNA	148645	Homo sapiens	MYC	protein	4609	Homo sapiens	ChIP-seq	ChIPBase	None	0.5483
RAID04088163	Gm14243	lncRNA	100126880	Mus musculus	E2f1	protein	13555	Mus musculus	ChIP-seq	ChIPBase	None	0.5483
RAID04088168	Snhg20	lncRNA	76972	Mus musculus	Srsf2	protein	20382	Mus musculus	CLIP-seq	starBase	None	0.5483
RAID04088199	FENDRR	lncRNA	400550	Homo sapiens	TRAF3IP2	protein	10758	Homo sapiens	Microarray//RNA-seq	LncRNA2Target	None	0.6606
RAID04088283	TUG1	lncRNA	55000	Homo sapiens	CTR9	protein	9646	Homo sapiens	Microarray//RNA-seq	LncRNA2Target	None	0.6606
RAID04088289	MALAT1	lncRNA	378938	Homo sapiens	ARF6	protein	382	Homo sapiens	Microarray//RNA-seq	LncRNA2Target	None	0.6606
RAID04088309	SNHG5	lncRNA	387066	Homo sapiens	NELFE	protein	7936	Homo sapiens	ChIP-seq	ChIPBase	None	0.5483
RAID04088363	TUG1	lncRNA	55000	Homo sapiens	SCIN	protein	85477	Homo sapiens	Microarray//RNA-seq	LncRNA2Target	None	0.6606
RAID04088400	BANCR	lncRNA	100885775	Homo sapiens	ACCS	protein	84680	Homo sapiens	Microarray//RNA-seq	LncRNA2Target	None	0.6606
RAID04088401	G730013B05Rik	lncRNA	619312	Mus musculus	Rerg	protein	232441	Mus musculus	Microarray//RNA-seq	LncRNA2Target	None	0.6606
RAID04088454	TNKS2-AS1	lncRNA	100507633	Homo sapiens	FUS	protein	2521	Homo sapiens	CLIP-seq	starBase	None	0.5483
RAID04088483	Gm14286	lncRNA	102637388	Mus musculus	Srsf1	protein	110809	Mus musculus	CLIP-seq	starBase	None	0.5483
RAID04088488	SSR4P1	lncRNA	728039	Homo sapiens	TAF1	protein	6872	Homo sapiens	ChIP-seq	ChIPBase	None	0.5483
RAID04088527	G730013B05Rik	lncRNA	619312	Mus musculus	Il4ra	protein	16190	Mus musculus	Microarray//RNA-seq	LncRNA2Target	None	0.6606
RAID04088541	LOC90784	lncRNA	90784	Homo sapiens	IRF4	protein	3662	Homo sapiens	ChIP-seq	ChIPBase	None	0.5483
RAID04088562	STARD13-IT1	lncRNA	100874373	Homo sapiens	POU2F2	protein	5452	Homo sapiens	ChIP-seq	ChIPBase	None	0.5483
RAID04088645	CRNDE	lncRNA	643911	Homo sapiens	ANKRD37	protein	353322	Homo sapiens	Microarray//RNA-seq	LncRNA2Target	None	0.6606
RAID04088659	FENDRR	lncRNA	400550	Homo sapiens	MATN2	protein	4147	Homo sapiens	Microarray//RNA-seq	LncRNA2Target	None	0.6606
RAID04088726	FENDRR	lncRNA	400550	Homo sapiens	METTL7A	protein	25840	Homo sapiens	Microarray//RNA-seq	LncRNA2Target	None	0.6606
RAID04088734	CRNDE	lncRNA	643911	Homo sapiens	PCDHB8	protein	56128	Homo sapiens	Microarray//RNA-seq	LncRNA2Target	None	0.6606
RAID04088768	MALAT1	lncRNA	378938	Homo sapiens	KIF20B	protein	9585	Homo sapiens	Microarray//RNA-seq	LncRNA2Target	None	0.6606
RAID04088772	ANCR	lncRNA	282	Homo sapiens	MED18	protein	54797	Homo sapiens	Microarray//RNA-seq	LncRNA2Target	None	0.6606
RAID04088816	SRSF10	lncRNA	10772	Homo sapiens	NELFE	protein	7936	Homo sapiens	ChIP-seq	ChIPBase	None	0.5483
RAID04088853	DCP1A	lncRNA	55802	Homo sapiens	PUM2	protein	23369	Homo sapiens	CLIP-seq	starBase	None	0.5483
RAID04088896	GRK4	lncRNA	2868	Homo sapiens	SMARCA4	protein	6597	Homo sapiens	ChIP-seq	ChIPBase	None	0.5483
RAID04088935	TUG1	lncRNA	55000	Homo sapiens	C19orf66	protein	55337	Homo sapiens	Microarray//RNA-seq	LncRNA2Target	None	0.6606
RAID04088984	4933406C10Rik	lncRNA	74076	Mus musculus	Gata4	protein	14463	Mus musculus	ChIP-seq	ChIPBase	None	0.5483
RAID04089089	MALAT1	lncRNA	378938	Homo sapiens	TRPV1	protein	7442	Homo sapiens	Microarray//RNA-seq	LncRNA2Target	None	0.6606
RAID04089105	Gm12596	lncRNA	101055769	Mus musculus	Cebpb	protein	12608	Mus musculus	ChIP-seq	ChIPBase	None	0.5483
RAID04089143	HCG16	lncRNA	414766	Homo sapiens	NANOG	protein	79923	Homo sapiens	ChIP-seq	ChIPBase	None	0.5483
RAID04089144	TUG1	lncRNA	55000	Homo sapiens	STAT1	protein	6772	Homo sapiens	Microarray//RNA-seq	LncRNA2Target	None	0.6606
RAID04089148	C030034L19Rik	lncRNA	320088	Mus musculus	Gfi1b	protein	14582	Mus musculus	ChIP-seq	ChIPBase	None	0.5483
RAID04089208	FLJ25758	lncRNA	497049	Homo sapiens	SPI1	protein	6688	Homo sapiens	ChIP-seq	ChIPBase	None	0.5483
RAID04089221	4930455D15Rik	lncRNA	75795	Mus musculus	Fli1	protein	14247	Mus musculus	ChIP-seq	ChIPBase	None	0.5483
RAID04089228	TUG1	lncRNA	55000	Homo sapiens	SNAI2	protein	6591	Homo sapiens	Microarray//RNA-seq	LncRNA2Target	None	0.6606
RAID04089289	MALAT1	lncRNA	378938	Homo sapiens	HIST1H4B	protein	8366	Homo sapiens	Microarray//RNA-seq	LncRNA2Target	None	0.6606
RAID04089303	MALAT1	lncRNA	378938	Homo sapiens	DDB2	protein	1643	Homo sapiens	Microarray//RNA-seq	LncRNA2Target	None	0.6606
RAID04089331	A330048O09Rik	lncRNA	320315	Mus musculus	Rad21	protein	19357	Mus musculus	ChIP-seq	ChIPBase	None	0.5483
RAID04089368	FENDRR	lncRNA	400550	Homo sapiens	IFIT2	protein	3433	Homo sapiens	Microarray//RNA-seq	LncRNA2Target	None	0.6606
RAID04089373	G730013B05Rik	lncRNA	619312	Mus musculus	Clstn2	protein	64085	Mus musculus	Microarray//RNA-seq	LncRNA2Target	None	0.6606
RAID04089433	WDFY3-AS2	lncRNA	404201	Homo sapiens	CDX2	protein	1045	Homo sapiens	ChIP-seq	ChIPBase	None	0.5483
RAID04089454	TUG1	lncRNA	55000	Homo sapiens	CEMIP	protein	57214	Homo sapiens	Microarray//RNA-seq	LncRNA2Target	None	0.6606
RAID04089511	CTD-2154B17.1	lncRNA	102723441	Homo sapiens	BCL3	protein	602	Homo sapiens	ChIP-seq	ChIPBase	None	0.5483
RAID04089531	TUG1	lncRNA	55000	Homo sapiens	THNSL1	protein	79896	Homo sapiens	Microarray//RNA-seq	LncRNA2Target	None	0.6606
RAID04089539	FENDRR	lncRNA	400550	Homo sapiens	ADCK2	protein	90956	Homo sapiens	Microarray//RNA-seq	LncRNA2Target	None	0.6606
RAID04089553	THSD1P1	lncRNA	374500	Homo sapiens	STAT1	protein	6772	Homo sapiens	ChIP-seq	ChIPBase	None	0.5483
RAID04089564	FENDRR	lncRNA	400550	Homo sapiens	MAP3K1	protein	4214	Homo sapiens	Microarray//RNA-seq	LncRNA2Target	None	0.6606
RAID04089568	TUG1	lncRNA	55000	Homo sapiens	U2AF2	protein	11338	Homo sapiens	CLIP-seq	starBase	None	0.5483
RAID04089576	ANCR	lncRNA	282	Homo sapiens	STMN3	protein	50861	Homo sapiens	Microarray//RNA-seq	LncRNA2Target	None	0.6606
RAID04089614	2700012I20Rik	lncRNA	72588	Mus musculus	Erg	protein	13876	Mus musculus	ChIP-seq	ChIPBase	None	0.5483
RAID04089678	TUG1	lncRNA	55000	Homo sapiens	KIF20A	protein	10112	Homo sapiens	Microarray//RNA-seq	LncRNA2Target	None	0.6606
RAID04089711	C030047K22Rik	lncRNA	77618	Mus musculus	Rad21	protein	19357	Mus musculus	ChIP-seq	ChIPBase	None	0.5483
RAID04089781	PRIM2	lncRNA	5558	Homo sapiens	E2F1	protein	1869	Homo sapiens	ChIP-seq	ChIPBase	None	0.5483
RAID04089810	LINC00200	lncRNA	399706	Homo sapiens	E2F6	protein	1876	Homo sapiens	ChIP-seq	ChIPBase	None	0.5483
RAID04089825	FENDRR	lncRNA	400550	Homo sapiens	DUSP3	protein	1845	Homo sapiens	Microarray//RNA-seq	LncRNA2Target	None	0.6606
RAID04089857	CRNDE	lncRNA	643911	Homo sapiens	TMEM168	protein	64418	Homo sapiens	Microarray//RNA-seq	LncRNA2Target	None	0.6606
RAID04089877	LINC00837	lncRNA	100507605	Homo sapiens	DGCR8	protein	54487	Homo sapiens	CLIP-seq	starBase	None	0.5483
RAID04089889	RBM48	lncRNA	84060	Homo sapiens	CDX2	protein	1045	Homo sapiens	ChIP-seq	ChIPBase	None	0.5483
RAID04089892	MIR155HG	lncRNA	114614	Homo sapiens	BATF	protein	10538	Homo sapiens	ChIP-seq	ChIPBase	None	0.5483
RAID04089920	C9orf3	lncRNA	84909	Homo sapiens	JUND	protein	3727	Homo sapiens	ChIP-seq	ChIPBase	None	0.5483
RAID04089979	4930509E16Rik	lncRNA	75115	Mus musculus	Spi1	protein	20375	Mus musculus	ChIP-seq	ChIPBase	None	0.5483
RAID04089981	TUG1	lncRNA	55000	Homo sapiens	MC1R	protein	4157	Homo sapiens	Microarray//RNA-seq	LncRNA2Target	None	0.6606
RAID04090069	FENDRR	lncRNA	400550	Homo sapiens	CRYAB	protein	1410	Homo sapiens	Microarray//RNA-seq	LncRNA2Target	None	0.6606
RAID04090172	Gm15322	lncRNA	102636826	Mus musculus	Nkx2-5	protein	18091	Mus musculus	ChIP-seq	ChIPBase	None	0.5483
RAID04090177	2700038G22Rik	lncRNA	67194	Mus musculus	Foxa2	protein	15376	Mus musculus	ChIP-seq	ChIPBase	None	0.5483
RAID04090257	FENDRR	lncRNA	400550	Homo sapiens	GLMP	protein	112770	Homo sapiens	Microarray//RNA-seq	LncRNA2Target	None	0.6606
RAID04090377	TUG1	lncRNA	55000	Homo sapiens	CLN8	protein	2055	Homo sapiens	Microarray//RNA-seq	LncRNA2Target	None	0.6606
RAID04090417	CHIT1	lncRNA	1118	Homo sapiens	TCF12	protein	6938	Homo sapiens	ChIP-seq	ChIPBase	None	0.5483
RAID04090431	TUG1	lncRNA	55000	Homo sapiens	RAP2C	protein	57826	Homo sapiens	Microarray//RNA-seq	LncRNA2Target	None	0.6606
RAID04090446	Gm15408	lncRNA	100503307	Mus musculus	E2f1	protein	13555	Mus musculus	ChIP-seq	ChIPBase	None	0.5483
RAID04090456	MALAT1	lncRNA	378938	Homo sapiens	KIAA0753	protein	9851	Homo sapiens	Microarray//RNA-seq	LncRNA2Target	None	0.6606
RAID04090466	TUG1	lncRNA	55000	Homo sapiens	GOT1	protein	2805	Homo sapiens	Microarray//RNA-seq	LncRNA2Target	None	0.6606
RAID04090482	RBM26-AS1	lncRNA	100505538	Homo sapiens	ERG	protein	2078	Homo sapiens	ChIP-seq	ChIPBase	None	0.5483
RAID04090504	Gm15458	lncRNA	100042744	Mus musculus	Fus	protein	233908	Mus musculus	CLIP-seq	starBase	None	0.5483
RAID04090509	TPD52	lncRNA	7163	Homo sapiens	POU5F1	protein	5460	Homo sapiens	ChIP-seq	ChIPBase	None	0.5483
RAID04090539	Gm2078	lncRNA	100039168	Mus musculus	Ctcf	protein	13018	Mus musculus	ChIP-seq	ChIPBase	None	0.5483
RAID04090625	ABCA17P	lncRNA	650655	Homo sapiens	SETDB1	protein	9869	Homo sapiens	ChIP-seq	ChIPBase	None	0.5483
RAID04090649	Gm12866	lncRNA	433751	Mus musculus	Ctcf	protein	13018	Mus musculus	ChIP-seq	ChIPBase	None	0.5483
RAID04090674	ZDHHC8P1	lncRNA	150244	Homo sapiens	NR3C1	protein	2908	Homo sapiens	ChIP-seq	ChIPBase	None	0.5483
RAID04090697	LOC100506178	lncRNA	100506178	Homo sapiens	FOXA1	protein	3169	Homo sapiens	ChIP-seq	ChIPBase	None	0.5483
RAID04090745	1700023C21Rik	lncRNA	73257	Mus musculus	Spi1	protein	20375	Mus musculus	ChIP-seq	ChIPBase	None	0.5483
RAID04090760	NUTM2A-AS1	lncRNA	728190	Homo sapiens	DGCR8	protein	54487	Homo sapiens	CLIP-seq	starBase	None	0.5483
RAID04090960	APBB3	lncRNA	10307	Homo sapiens	YY1	protein	7528	Homo sapiens	ChIP-seq	ChIPBase	None	0.5483
RAID04091003	Gm15663	lncRNA	327812	Mus musculus	Foxa2	protein	15376	Mus musculus	ChIP-seq	ChIPBase	None	0.5483
RAID04091018	Gm13572	lncRNA	102636022	Mus musculus	Cebpb	protein	12608	Mus musculus	ChIP-seq	ChIPBase	None	0.5483
RAID04091063	LOC100130992	lncRNA	100130992	Homo sapiens	BCL11A	protein	53335	Homo sapiens	ChIP-seq	ChIPBase	None	0.5483
RAID04091075	NEAT1	lncRNA	283131	Homo sapiens	TSGA10	protein	80705	Homo sapiens	Microarray//RNA-seq	LncRNA2Target	None	0.6606
RAID04091098	CRNDE	lncRNA	643911	Homo sapiens	MPP1	protein	4354	Homo sapiens	Microarray//RNA-seq	LncRNA2Target	None	0.6606
RAID04091165	CRNDE	lncRNA	643911	Homo sapiens	GUF1	protein	60558	Homo sapiens	Microarray//RNA-seq	LncRNA2Target	None	0.6606
RAID04091185	Xist	lncRNA	213742	Mus musculus	Lbr	protein	98386	Mus musculus	Mass spectrometry//Nucleic acid uv cross-linking assay	RAID	25915022	0.8808
RAID04091212	D230017M19Rik	lncRNA	320933	Mus musculus	Ep300	protein	328572	Mus musculus	ChIP-seq	ChIPBase	None	0.5483
RAID04091227	TUG1	lncRNA	55000	Homo sapiens	CYBRD1	protein	79901	Homo sapiens	Microarray//RNA-seq	LncRNA2Target	None	0.6606
RAID04091236	LOC728730	lncRNA	728730	Homo sapiens	HEY1	protein	23462	Homo sapiens	ChIP-seq	ChIPBase	None	0.5483
RAID04091252	CRNDE	lncRNA	643911	Homo sapiens	SERPINA1	protein	5265	Homo sapiens	Microarray//RNA-seq	LncRNA2Target	None	0.6606
RAID04091255	ANCR	lncRNA	282	Homo sapiens	PLPP2	protein	8612	Homo sapiens	Microarray//RNA-seq	LncRNA2Target	None	0.6606
RAID04091292	LINC00324	lncRNA	284029	Homo sapiens	POLR3A	protein	11128	Homo sapiens	ChIP-seq	ChIPBase	None	0.5483
RAID04091329	C330019F10Rik	lncRNA	442849	Mus musculus	Meis1	protein	17268	Mus musculus	ChIP-seq	ChIPBase	None	0.5483
RAID04091343	1700007L15Rik	lncRNA	100502742	Mus musculus	Sox9	protein	20682	Mus musculus	Microarray//RNA-seq	LncRNA2Target	None	0.6606
RAID04091388	Gm4262	lncRNA	100043147	Mus musculus	Gata4	protein	14463	Mus musculus	ChIP-seq	ChIPBase	None	0.5483
RAID04091395	Gm16619	lncRNA	100503470	Mus musculus	Cebpb	protein	12608	Mus musculus	ChIP-seq	ChIPBase	None	0.5483
RAID04091406	FENDRR	lncRNA	400550	Homo sapiens	MVD	protein	4597	Homo sapiens	Microarray//RNA-seq	LncRNA2Target	None	0.6606
RAID04091422	G730013B05Rik	lncRNA	619312	Mus musculus	Idh2	protein	269951	Mus musculus	Microarray//RNA-seq	LncRNA2Target	None	0.6606
RAID04091434	Fendrr	lncRNA	68790	Mus musculus	Igtp	protein	16145	Mus musculus	Microarray//RNA-seq	LncRNA2Target	None	0.6606
RAID04091455	ANCR	lncRNA	282	Homo sapiens	COL22A1	protein	169044	Homo sapiens	Microarray//RNA-seq	LncRNA2Target	None	0.6606
RAID04091539	B230206H07Rik	lncRNA	320871	Mus musculus	Fus	protein	233908	Mus musculus	CLIP-seq	starBase	None	0.5483
RAID04091575	RAET1K	lncRNA	646024	Homo sapiens	EP300	protein	2033	Homo sapiens	ChIP-seq	ChIPBase	None	0.5483
RAID04091587	H19	lncRNA	283120	Homo sapiens	TP53	protein	7157	Homo sapiens	RIP (RNA Immunoprecipitation)//IP (immunoprecipitation)//Pull down Assay//Reporter Assay//Nucleic acid transfection//Western Blot//RT-PCR	MNDR//ncRDeathDB2.0//RAID//NPInter	23222637//20380817//9620557//22776265	0.9991
RAID04091661	Rab10os	lncRNA	74173	Mus musculus	Tardbp	protein	230908	Mus musculus	CLIP-seq	starBase	None	0.5483
RAID04091820	LINC00162	lncRNA	378825	Homo sapiens	E2F1	protein	1869	Homo sapiens	ChIP-seq	ChIPBase	None	0.5483
RAID04091825	LOC389247	lncRNA	389247	Homo sapiens	BCL3	protein	602	Homo sapiens	ChIP-seq	ChIPBase	None	0.5483
RAID04091861	Gm16793	lncRNA	100504714	Mus musculus	Mtf2	protein	17765	Mus musculus	ChIP-seq	ChIPBase	None	0.5483
RAID04091868	4930432B10Rik	lncRNA	74619	Mus musculus	Zfx	protein	22764	Mus musculus	ChIP-seq	ChIPBase	None	0.5483
RAID04091900	MALAT1	lncRNA	378938	Homo sapiens	HTR7	protein	3363	Homo sapiens	Microarray//RNA-seq	LncRNA2Target	None	0.6606
RAID04091914	DICER1-AS1	lncRNA	400242	Homo sapiens	LIN28A	protein	79727	Homo sapiens	CLIP-seq	starBase	None	0.5483
RAID04091917	FENDRR	lncRNA	400550	Homo sapiens	LARP4	protein	113251	Homo sapiens	Microarray//RNA-seq	LncRNA2Target	None	0.6606
RAID04091942	CTB-1I21.1	lncRNA	105379191	Homo sapiens	GATA6	protein	2627	Homo sapiens	ChIP-seq	ChIPBase	None	0.5483
RAID04091974	MALAT1	lncRNA	378938	Homo sapiens	LRRC8E	protein	80131	Homo sapiens	Microarray//RNA-seq	LncRNA2Target	None	0.6606
RAID04091998	TUG1	lncRNA	55000	Homo sapiens	NFYA	protein	4800	Homo sapiens	ChIP-seq	ChIPBase	None	0.5483
RAID04092023	LINC00094	lncRNA	266655	Homo sapiens	UPF1	protein	5976	Homo sapiens	CLIP-seq	starBase	None	0.5483
RAID04092122	GRIP2	lncRNA	80852	Homo sapiens	EIF4A3	protein	9775	Homo sapiens	CLIP-seq	starBase	None	0.5483
RAID04092170	Frs3os	lncRNA	100126242	Mus musculus	Fus	protein	233908	Mus musculus	CLIP-seq	starBase	None	0.5483
RAID04092218	Gm16740	lncRNA	100504029	Mus musculus	Rbbp5	protein	213464	Mus musculus	ChIP-seq	ChIPBase	None	0.5483
RAID04092250	TUG1	lncRNA	55000	Homo sapiens	MELK	protein	9833	Homo sapiens	Microarray//RNA-seq	LncRNA2Target	None	0.6606
RAID04092265	CRNDE	lncRNA	643911	Homo sapiens	MRPS26	protein	64949	Homo sapiens	Microarray//RNA-seq	LncRNA2Target	None	0.6606
RAID04092284	FLVCR1-AS1	lncRNA	642946	Homo sapiens	ERG	protein	2078	Homo sapiens	ChIP-seq	ChIPBase	None	0.5483
RAID04092293	CRNDE	lncRNA	643911	Homo sapiens	GSTA3	protein	2940	Homo sapiens	Microarray//RNA-seq	LncRNA2Target	None	0.6606
RAID04092298	SNHG8	lncRNA	100093630	Homo sapiens	SRSF1	protein	6426	Homo sapiens	CLIP-seq	starBase	None	0.5483
RAID04092299	LOC729609	lncRNA	729609	Homo sapiens	HNF4A	protein	3172	Homo sapiens	ChIP-seq	ChIPBase	None	0.5483
RAID04092300	ENPP2	lncRNA	5168	Homo sapiens	POU2F2	protein	5452	Homo sapiens	ChIP-seq	ChIPBase	None	0.5483
RAID04092338	FENDRR	lncRNA	400550	Homo sapiens	KAZN	protein	23254	Homo sapiens	Microarray//RNA-seq	LncRNA2Target	None	0.6606
RAID04092366	C8orf46	lncRNA	254778	Homo sapiens	JUND	protein	3727	Homo sapiens	ChIP-seq	ChIPBase	None	0.5483
RAID04092376	MALAT1	lncRNA	378938	Homo sapiens	PCNP	protein	57092	Homo sapiens	Microarray//RNA-seq	LncRNA2Target	None	0.6606
RAID04092390	LOC339807	lncRNA	339807	Homo sapiens	TFAP2A	protein	7020	Homo sapiens	ChIP-seq	ChIPBase	None	0.5483
RAID04092393	FENDRR	lncRNA	400550	Homo sapiens	TMEM70	protein	54968	Homo sapiens	Microarray//RNA-seq	LncRNA2Target	None	0.6606
RAID04092421	CRNDE	lncRNA	643911	Homo sapiens	GINS4	protein	84296	Homo sapiens	Microarray//RNA-seq	LncRNA2Target	None	0.6606
RAID04092452	HIVEP3	lncRNA	59269	Homo sapiens	TCF12	protein	6938	Homo sapiens	ChIP-seq	ChIPBase	None	0.5483
RAID04092456	SNHG8	lncRNA	100093630	Homo sapiens	FMR1	protein	2332	Homo sapiens	CLIP-seq	starBase	None	0.5483
RAID04092460	FENDRR	lncRNA	400550	Homo sapiens	ZNF865	protein	100507290	Homo sapiens	Microarray//RNA-seq	LncRNA2Target	None	0.6606
RAID04092514	HCG18	lncRNA	414777	Homo sapiens	EP300	protein	2033	Homo sapiens	ChIP-seq	ChIPBase	None	0.5483
RAID04092569	TTC28-AS1	lncRNA	284900	Homo sapiens	LIN28A	protein	79727	Homo sapiens	CLIP-seq	starBase	None	0.5483
RAID04092578	ZNF37BP	lncRNA	100129482	Homo sapiens	JUN	protein	3725	Homo sapiens	ChIP-seq	ChIPBase	None	0.5483
RAID04092607	1110036E04Rik	lncRNA	68697	Mus musculus	Myb	protein	17863	Mus musculus	ChIP-seq	ChIPBase	None	0.5483
RAID04092622	FAM138D	lncRNA	677784	Homo sapiens	MYC	protein	4609	Homo sapiens	ChIP-seq	ChIPBase	None	0.5483
RAID04092684	SMCR2	lncRNA	105371564	Homo sapiens	CTCF	protein	10664	Homo sapiens	ChIP-seq	ChIPBase	None	0.5483
RAID04092741	MALAT1	lncRNA	378938	Homo sapiens	CCDC62	protein	84660	Homo sapiens	Microarray//RNA-seq	LncRNA2Target	None	0.6606
RAID04092749	GALNT5	lncRNA	11227	Homo sapiens	JUN	protein	3725	Homo sapiens	ChIP-seq	ChIPBase	None	0.5483
RAID04092769	FENDRR	lncRNA	400550	Homo sapiens	UPP1	protein	7378	Homo sapiens	Microarray//RNA-seq	LncRNA2Target	None	0.6606
RAID04092772	TUG1	lncRNA	55000	Homo sapiens	HOXB7	protein	3217	Homo sapiens	Western Blot//RT-PCR	LncRNA2Target	24853421	0.8808
RAID04092798	ANCR	lncRNA	282	Homo sapiens	EIF2AK4	protein	440275	Homo sapiens	Microarray//RNA-seq	LncRNA2Target	None	0.6606
RAID04092810	LOC100505622	lncRNA	100505622	Homo sapiens	AR	protein	367	Homo sapiens	ChIP-seq	ChIPBase	None	0.5483
RAID04092898	FENDRR	lncRNA	400550	Homo sapiens	DPY19L3	protein	147991	Homo sapiens	Microarray//RNA-seq	LncRNA2Target	None	0.6606
RAID04092994	MIR4500HG	lncRNA	642345	Homo sapiens	HNF4A	protein	3172	Homo sapiens	ChIP-seq	ChIPBase	None	0.5483
RAID04092999	LINC00473	lncRNA	90632	Homo sapiens	TIAL1	protein	7073	Homo sapiens	CLIP-seq	starBase	None	0.5483
RAID04093015	Gm15663	lncRNA	327812	Mus musculus	Rad21	protein	19357	Mus musculus	ChIP-seq	ChIPBase	None	0.5483
RAID04093050	HAR1A	lncRNA	768096	Homo sapiens	ZNF263	protein	10127	Homo sapiens	ChIP-seq	ChIPBase	None	0.5483
RAID04093061	G730013B05Rik	lncRNA	619312	Mus musculus	Cdca3	protein	14793	Mus musculus	Microarray//RNA-seq	LncRNA2Target	None	0.6606
RAID04093085	TUG1	lncRNA	55000	Homo sapiens	FARSA	protein	2193	Homo sapiens	Microarray//RNA-seq	LncRNA2Target	None	0.6606
RAID04093144	MIR600HG	lncRNA	81571	Homo sapiens	ELAVL1	protein	1994	Homo sapiens	CLIP-seq	starBase	None	0.5483
RAID04093171	MALAT1	lncRNA	378938	Homo sapiens	NDUFC2	protein	4718	Homo sapiens	Microarray//RNA-seq	LncRNA2Target	None	0.6606
RAID04093181	CROCCP2	lncRNA	84809	Homo sapiens	EIF4A3	protein	9775	Homo sapiens	CLIP-seq	starBase	None	0.5483
RAID04093194	Gm12349	lncRNA	100040491	Mus musculus	Fus	protein	233908	Mus musculus	CLIP-seq	starBase	None	0.5483
RAID04093207	LINC00189	lncRNA	193629	Homo sapiens	UPF1	protein	5976	Homo sapiens	CLIP-seq	starBase	None	0.5483
RAID04093226	6230400D17Rik	lncRNA	76133	Mus musculus	Cebpb	protein	12608	Mus musculus	ChIP-seq	ChIPBase	None	0.5483
RAID04093277	EMG1	lncRNA	10436	Homo sapiens	HNRNPC	protein	3183	Homo sapiens	CLIP-seq	starBase	None	0.5483
RAID04093278	FENDRR	lncRNA	400550	Homo sapiens	TM4SF1	protein	4071	Homo sapiens	Microarray//RNA-seq	LncRNA2Target	None	0.6606
RAID04093308	Gm13391	lncRNA	100040387	Mus musculus	Tbx5	protein	21388	Mus musculus	ChIP-seq	ChIPBase	None	0.5483
RAID04093341	ANCR	lncRNA	282	Homo sapiens	CFL2	protein	1073	Homo sapiens	Microarray//RNA-seq	LncRNA2Target	None	0.6606
RAID04093351	TUG1	lncRNA	55000	Homo sapiens	SNTB1	protein	6641	Homo sapiens	Microarray//RNA-seq	LncRNA2Target	None	0.6606
RAID04093355	FENDRR	lncRNA	400550	Homo sapiens	ZNF395	protein	55893	Homo sapiens	Microarray//RNA-seq	LncRNA2Target	None	0.6606
RAID04093368	2010015M23Rik	lncRNA	72087	Mus musculus	Foxa2	protein	15376	Mus musculus	ChIP-seq	ChIPBase	None	0.5483
RAID04093387	2410080I02Rik	lncRNA	68248	Mus musculus	Esrrb	protein	26380	Mus musculus	ChIP-seq	ChIPBase	None	0.5483
RAID04093390	Gm9917	lncRNA	100038755	Mus musculus	Cebpb	protein	12608	Mus musculus	ChIP-seq	ChIPBase	None	0.5483
RAID04093453	ZNF503	lncRNA	84858	Homo sapiens	CDX2	protein	1045	Homo sapiens	ChIP-seq	ChIPBase	None	0.5483
RAID04093532	FAM201A	lncRNA	158228	Homo sapiens	LIN28A	protein	79727	Homo sapiens	CLIP-seq	starBase	None	0.5483
RAID04093594	Gm2449	lncRNA	100039837	Mus musculus	Sin3a	protein	20466	Mus musculus	ChIP-seq	ChIPBase	None	0.5483
RAID04093598	FENDRR	lncRNA	400550	Homo sapiens	ANKRD28	protein	23243	Homo sapiens	Microarray//RNA-seq	LncRNA2Target	None	0.6606
RAID04093643	CRNDE	lncRNA	643911	Homo sapiens	SYT1	protein	6857	Homo sapiens	Microarray//RNA-seq	LncRNA2Target	None	0.6606
RAID04093665	FENDRR	lncRNA	400550	Homo sapiens	SLC2A8	protein	29988	Homo sapiens	Microarray//RNA-seq	LncRNA2Target	None	0.6606
RAID04093686	MFI2-AS1	lncRNA	100507057	Homo sapiens	U2AF2	protein	11338	Homo sapiens	CLIP-seq	starBase	None	0.5483
RAID04093695	AA06	lncRNA	100506677	Homo sapiens	SMAD4	protein	4089	Homo sapiens	ChIP-seq	ChIPBase	None	0.5483
RAID04093742	TUG1	lncRNA	55000	Homo sapiens	CRIP2	protein	1397	Homo sapiens	Microarray//RNA-seq	LncRNA2Target	None	0.6606
RAID04093849	MATN1-AS1	lncRNA	100129196	Homo sapiens	FUS	protein	2521	Homo sapiens	CLIP-seq	starBase	None	0.5483
RAID04093892	FENDRR	lncRNA	400550	Homo sapiens	DDT	protein	1652	Homo sapiens	Microarray//RNA-seq	LncRNA2Target	None	0.6606
RAID04093894	Pisd-ps2	lncRNA	328734	Mus musculus	Wdr5	protein	140858	Mus musculus	ChIP-seq	ChIPBase	None	0.5483
RAID04093902	LOC100272217	lncRNA	100272217	Homo sapiens	POLR3A	protein	11128	Homo sapiens	ChIP-seq	ChIPBase	None	0.5483
RAID04093912	MALAT1	lncRNA	378938	Homo sapiens	PLCE1	protein	51196	Homo sapiens	Microarray//RNA-seq	LncRNA2Target	None	0.6606
RAID04093917	LOC100270746	lncRNA	100270746	Homo sapiens	TCF12	protein	6938	Homo sapiens	ChIP-seq	ChIPBase	None	0.5483
RAID04093928	4930529I22Rik	lncRNA	75231	Mus musculus	Ptbp2	protein	56195	Mus musculus	CLIP-seq	starBase	None	0.5483
RAID04094055	Gm17259	lncRNA	100502757	Mus musculus	Erg	protein	13876	Mus musculus	ChIP-seq	ChIPBase	None	0.5483
RAID04094073	FENDRR	lncRNA	400550	Homo sapiens	SNAI1	protein	6615	Homo sapiens	Microarray//RNA-seq	LncRNA2Target	None	0.6606
RAID04094080	LINC00511	lncRNA	400619	Homo sapiens	FUS	protein	2521	Homo sapiens	CLIP-seq	starBase	None	0.5483
RAID04094113	MIR210HG	lncRNA	100506211	Homo sapiens	REST	protein	5978	Homo sapiens	ChIP-seq	ChIPBase	None	0.5483
RAID04094164	CRNDE	lncRNA	643911	Homo sapiens	HIST1H1E	protein	3008	Homo sapiens	Microarray//RNA-seq	LncRNA2Target	None	0.6606
RAID04094165	TUG1	lncRNA	55000	Homo sapiens	ACTR1A	protein	10121	Homo sapiens	Microarray//RNA-seq	LncRNA2Target	None	0.6606
RAID04094177	LOC100288069	lncRNA	100288069	Homo sapiens	E2F6	protein	1876	Homo sapiens	ChIP-seq	ChIPBase	None	0.5483
RAID04094188	Gm10822	lncRNA	100038532	Mus musculus	E2f4	protein	104394	Mus musculus	ChIP-seq	ChIPBase	None	0.5483
RAID04094249	EGFR-AS1	lncRNA	100507500	Homo sapiens	FUS	protein	2521	Homo sapiens	CLIP-seq	starBase	None	0.5483
RAID04094286	FENDRR	lncRNA	400550	Homo sapiens	ATP6V0D1	protein	9114	Homo sapiens	Microarray//RNA-seq	LncRNA2Target	None	0.6606
RAID04094325	Gm12907	lncRNA	102634068	Mus musculus	Cebpb	protein	12608	Mus musculus	ChIP-seq	ChIPBase	None	0.5483
RAID04094355	DGCR5	lncRNA	26220	Homo sapiens	HNF4A	protein	3172	Homo sapiens	ChIP-seq	ChIPBase	None	0.5483
RAID04094360	Platr22	lncRNA	100503474	Mus musculus	Smad1	protein	17125	Mus musculus	ChIP-seq	ChIPBase	None	0.5483
RAID04094447	JPX	lncRNA	554203	Homo sapiens	PBX3	protein	5090	Homo sapiens	ChIP-seq	ChIPBase	None	0.5483
RAID04094484	RAET1K	lncRNA	646024	Homo sapiens	TCF12	protein	6938	Homo sapiens	ChIP-seq	ChIPBase	None	0.5483
RAID04094495	1700007L15Rik	lncRNA	100502742	Mus musculus	St3gal6	protein	54613	Mus musculus	Microarray//RNA-seq	LncRNA2Target	None	0.6606
RAID04094508	HCG27	lncRNA	253018	Homo sapiens	ETS1	protein	2113	Homo sapiens	ChIP-seq	ChIPBase	None	0.5483
RAID04094568	LOC63930	lncRNA	63930	Homo sapiens	SMARCB1	protein	6598	Homo sapiens	ChIP-seq	ChIPBase	None	0.5483
RAID04094598	MALAT1	lncRNA	378938	Homo sapiens	CDCA5	protein	113130	Homo sapiens	Microarray//RNA-seq	LncRNA2Target	None	0.6606
RAID04094672	LINC00324	lncRNA	284029	Homo sapiens	AR	protein	367	Homo sapiens	ChIP-seq	ChIPBase	None	0.5483
RAID04094705	RPL23AP82	lncRNA	284942	Homo sapiens	RXRA	protein	6256	Homo sapiens	ChIP-seq	ChIPBase	None	0.5483
RAID04094713	FENDRR	lncRNA	400550	Homo sapiens	ZNF117	protein	51351	Homo sapiens	Microarray//RNA-seq	LncRNA2Target	None	0.6606
RAID04094756	TUG1	lncRNA	55000	Homo sapiens	EDEM3	protein	80267	Homo sapiens	Microarray//RNA-seq	LncRNA2Target	None	0.6606
RAID04094779	ATP11A-AS1	lncRNA	100874205	Homo sapiens	HSF1	protein	3297	Homo sapiens	ChIP-seq	ChIPBase	None	0.5483
RAID04094782	ST7-AS2	lncRNA	93654	Homo sapiens	UPF1	protein	5976	Homo sapiens	CLIP-seq	starBase	None	0.5483
RAID04094811	FENDRR	lncRNA	400550	Homo sapiens	STXBP2	protein	6813	Homo sapiens	Microarray//RNA-seq	LncRNA2Target	None	0.6606
RAID04094830	XXYLT1-AS2	lncRNA	101410543	Homo sapiens	FUS	protein	2521	Homo sapiens	CLIP-seq	starBase	None	0.5483
RAID04094837	LOC283038	lncRNA	283038	Homo sapiens	CDX2	protein	1045	Homo sapiens	ChIP-seq	ChIPBase	None	0.5483
RAID04094883	NKAPP1	lncRNA	158801	Homo sapiens	RXRA	protein	6256	Homo sapiens	ChIP-seq	ChIPBase	None	0.5483
RAID04094888	GAS5	lncRNA	60674	Homo sapiens	U2AF2	protein	11338	Homo sapiens	CLIP-seq	starBase	None	0.5483
RAID04094920	4632411P08Rik	lncRNA	78263	Mus musculus	Pparg	protein	19016	Mus musculus	ChIP-seq	ChIPBase	None	0.5483
RAID04094921	FENDRR	lncRNA	400550	Homo sapiens	TMEM248	protein	55069	Homo sapiens	Microarray//RNA-seq	LncRNA2Target	None	0.6606
RAID04094927	FENDRR	lncRNA	400550	Homo sapiens	UGCG	protein	7357	Homo sapiens	Microarray//RNA-seq	LncRNA2Target	None	0.6606
RAID04094963	LRRTM3	lncRNA	347731	Homo sapiens	PBX3	protein	5090	Homo sapiens	ChIP-seq	ChIPBase	None	0.5483
RAID04094984	NEAT1	lncRNA	283131	Homo sapiens	FOSL2	protein	2355	Homo sapiens	ChIP-seq	ChIPBase	None	0.5483
RAID04094996	LINC00323	lncRNA	284835	Homo sapiens	SMARCB1	protein	6598	Homo sapiens	ChIP-seq	ChIPBase	None	0.5483
RAID04095010	CNIH3	lncRNA	149111	Homo sapiens	SMARCC1	protein	6599	Homo sapiens	ChIP-seq	ChIPBase	None	0.5483
RAID04095034	MALAT1	lncRNA	378938	Homo sapiens	ANAPC10	protein	10393	Homo sapiens	Microarray//RNA-seq	LncRNA2Target	None	0.6606
RAID04095049	G730013B05Rik	lncRNA	619312	Mus musculus	Lrp2	protein	14725	Mus musculus	Microarray//RNA-seq	LncRNA2Target	None	0.6606
RAID04095052	LINC00656	lncRNA	200261	Homo sapiens	FUS	protein	2521	Homo sapiens	CLIP-seq	starBase	None	0.5483
RAID04095135	XLOC_009911	lncRNA	105500240	Homo sapiens	AR	protein	367	Homo sapiens	ChIP-seq	ChIPBase	None	0.5483
RAID04095138	4833418N02Rik	lncRNA	74597	Mus musculus	Sin3b	protein	20467	Mus musculus	ChIP-seq	ChIPBase	None	0.5483
RAID04095182	OLMALINC	lncRNA	90271	Homo sapiens	GATA2	protein	2624	Homo sapiens	ChIP-seq	ChIPBase	None	0.5483
RAID04095186	MALAT1	lncRNA	378938	Homo sapiens	EEF2K	protein	29904	Homo sapiens	Microarray//RNA-seq	LncRNA2Target	None	0.6606
RAID04095228	ANCR	lncRNA	282	Homo sapiens	MYRFL	protein	196446	Homo sapiens	Microarray//RNA-seq	LncRNA2Target	None	0.6606
RAID04095361	FENDRR	lncRNA	400550	Homo sapiens	MFGE8	protein	4240	Homo sapiens	Microarray//RNA-seq	LncRNA2Target	None	0.6606
RAID04095447	FKSG49	lncRNA	400949	Homo sapiens	FOSL2	protein	2355	Homo sapiens	ChIP-seq	ChIPBase	None	0.5483
RAID04095482	Ptpmt1	lncRNA	66461	Mus musculus	Fus	protein	233908	Mus musculus	CLIP-seq	starBase	None	0.5483
RAID04095496	C1QTNF9B-AS1	lncRNA	542767	Homo sapiens	SMARCC1	protein	6599	Homo sapiens	ChIP-seq	ChIPBase	None	0.5483
RAID04095507	AU019990	lncRNA	767814	Mus musculus	gr	protein	14781	Mus musculus	ChIP-seq	ChIPBase	None	0.5483
RAID04095530	TP53TG1	lncRNA	11257	Homo sapiens	SMARCC2	protein	6601	Homo sapiens	ChIP-seq	ChIPBase	None	0.5483
RAID04095599	HCG16	lncRNA	414766	Homo sapiens	FOSL2	protein	2355	Homo sapiens	ChIP-seq	ChIPBase	None	0.5483
RAID04095617	MALAT1	lncRNA	378938	Homo sapiens	ZNF385A	protein	25946	Homo sapiens	Microarray//RNA-seq	LncRNA2Target	None	0.6606
RAID04095652	FENDRR	lncRNA	400550	Homo sapiens	PLK3	protein	1263	Homo sapiens	Microarray//RNA-seq	LncRNA2Target	None	0.6606
RAID04095706	6030443J06Rik	lncRNA	320719	Mus musculus	Gata1	protein	14460	Mus musculus	ChIP-seq	ChIPBase	None	0.5483
RAID04095849	TUG1	lncRNA	55000	Homo sapiens	CEP89	protein	84902	Homo sapiens	Microarray//RNA-seq	LncRNA2Target	None	0.6606
RAID04095867	ANCR	lncRNA	282	Homo sapiens	ZNF785	protein	146540	Homo sapiens	Microarray//RNA-seq	LncRNA2Target	None	0.6606
RAID04095878	FENDRR	lncRNA	400550	Homo sapiens	LRRC59	protein	55379	Homo sapiens	Microarray//RNA-seq	LncRNA2Target	None	0.6606
RAID04095880	LINC00235	lncRNA	64493	Homo sapiens	JUN	protein	3725	Homo sapiens	ChIP-seq	ChIPBase	None	0.5483
RAID04095919	CRNDE	lncRNA	643911	Homo sapiens	HPSE2	protein	60495	Homo sapiens	Microarray//RNA-seq	LncRNA2Target	None	0.6606
RAID04095925	Gm12069	lncRNA	102637005	Mus musculus	Spi1	protein	20375	Mus musculus	ChIP-seq	ChIPBase	None	0.5483
RAID04095937	LY86-AS1	lncRNA	285780	Homo sapiens	EBF1	protein	1879	Homo sapiens	ChIP-seq	ChIPBase	None	0.5483
RAID04095968	LINC00222	lncRNA	387111	Homo sapiens	FOXA2	protein	3170	Homo sapiens	ChIP-seq	ChIPBase	None	0.5483
RAID04095989	LOC256880	lncRNA	256880	Homo sapiens	HNF4A	protein	3172	Homo sapiens	ChIP-seq	ChIPBase	None	0.5483
RAID04095991	LOC100289230	lncRNA	100289230	Homo sapiens	SPI1	protein	6688	Homo sapiens	ChIP-seq	ChIPBase	None	0.5483
RAID04095996	BANCR	lncRNA	100885775	Homo sapiens	MGARP	protein	84709	Homo sapiens	Microarray//RNA-seq	LncRNA2Target	None	0.6606
RAID04096000	ANCR	lncRNA	282	Homo sapiens	RASEF	protein	158158	Homo sapiens	Microarray//RNA-seq	LncRNA2Target	None	0.6606
RAID04096076	TUG1	lncRNA	55000	Homo sapiens	TGFB1	protein	7040	Homo sapiens	Microarray//RNA-seq	LncRNA2Target	None	0.6606
RAID04096079	CRNDE	lncRNA	643911	Homo sapiens	EVL	protein	51466	Homo sapiens	Microarray//RNA-seq	LncRNA2Target	None	0.6606
RAID04096087	LOC401324	lncRNA	401324	Homo sapiens	CDX2	protein	1045	Homo sapiens	ChIP-seq	ChIPBase	None	0.5483
RAID04096088	MAPKAPK5-AS1	lncRNA	51275	Homo sapiens	ZNF711	protein	7552	Homo sapiens	ChIP-seq	ChIPBase	None	0.5483
RAID04096130	MALAT1	lncRNA	378938	Homo sapiens	TCHP	protein	84260	Homo sapiens	Microarray//RNA-seq	LncRNA2Target	None	0.6606
RAID04096169	LINC00869	lncRNA	57234	Homo sapiens	FUS	protein	2521	Homo sapiens	CLIP-seq	starBase	None	0.5483
RAID04096203	FENDRR	lncRNA	400550	Homo sapiens	ANKRD13C	protein	81573	Homo sapiens	Microarray//RNA-seq	LncRNA2Target	None	0.6606
RAID04096211	MALAT1	lncRNA	378938	Homo sapiens	ZNF432	protein	9668	Homo sapiens	Microarray//RNA-seq	LncRNA2Target	None	0.6606
RAID04096236	FENDRR	lncRNA	400550	Homo sapiens	CSNK1G2	protein	1455	Homo sapiens	Microarray//RNA-seq	LncRNA2Target	None	0.6606
RAID04096354	ERICH1	lncRNA	157697	Homo sapiens	CDX2	protein	1045	Homo sapiens	ChIP-seq	ChIPBase	None	0.5483
RAID04096361	SNHG6	lncRNA	641638	Homo sapiens	SPI1	protein	6688	Homo sapiens	ChIP-seq	ChIPBase	None	0.5483
RAID04096412	Fendrr	lncRNA	68790	Mus musculus	Comt	protein	12846	Mus musculus	Microarray//RNA-seq	LncRNA2Target	None	0.6606
RAID04096454	MALAT1	lncRNA	378938	Homo sapiens	WDR26	protein	80232	Homo sapiens	Microarray//RNA-seq	LncRNA2Target	None	0.6606
RAID04096485	LOC284080	lncRNA	284080	Homo sapiens	SMARCB1	protein	6598	Homo sapiens	ChIP-seq	ChIPBase	None	0.5483
RAID04096505	NEAT1	lncRNA	283131	Homo sapiens	TCF7L2	protein	6934	Homo sapiens	ChIP-seq	ChIPBase	None	0.5483
RAID04096509	LOC728752	lncRNA	728752	Homo sapiens	HEY1	protein	23462	Homo sapiens	ChIP-seq	ChIPBase	None	0.5483
RAID04096518	G730013B05Rik	lncRNA	619312	Mus musculus	1810043G02Rik	protein	67884	Mus musculus	Microarray//RNA-seq	LncRNA2Target	None	0.6606
RAID04096537	Gm16677	lncRNA	100504477	Mus musculus	Wdr5	protein	140858	Mus musculus	ChIP-seq	ChIPBase	None	0.5483
RAID04096582	TUSC8	lncRNA	400128	Homo sapiens	FOXA1	protein	3169	Homo sapiens	ChIP-seq	ChIPBase	None	0.5483
RAID04096608	PRKAA1	lncRNA	5562	Homo sapiens	SP1	protein	6667	Homo sapiens	ChIP-seq	ChIPBase	None	0.5483
RAID04096619	Gm16576	lncRNA	100504191	Mus musculus	Fli1	protein	14247	Mus musculus	ChIP-seq	ChIPBase	None	0.5483
RAID04096628	AMPD3	lncRNA	272	Homo sapiens	ZZZ3	protein	26009	Homo sapiens	ChIP-seq	ChIPBase	None	0.5483
RAID04096635	LINC00324	lncRNA	284029	Homo sapiens	E2F6	protein	1876	Homo sapiens	ChIP-seq	ChIPBase	None	0.5483
RAID04096662	MALAT1	lncRNA	378938	Homo sapiens	BLVRA	protein	644	Homo sapiens	Microarray//RNA-seq	LncRNA2Target	None	0.6606
RAID04096664	4931440J10Rik	lncRNA	71000	Mus musculus	E2f1	protein	13555	Mus musculus	ChIP-seq	ChIPBase	None	0.5483
RAID04096702	FENDRR	lncRNA	400550	Homo sapiens	TOM1L1	protein	10040	Homo sapiens	Microarray//RNA-seq	LncRNA2Target	None	0.6606
RAID04096707	TOP1P2	lncRNA	7152	Homo sapiens	GATA6	protein	2627	Homo sapiens	ChIP-seq	ChIPBase	None	0.5483
RAID04096727	Snhg5	lncRNA	72655	Mus musculus	Srsf1	protein	110809	Mus musculus	CLIP-seq	starBase	None	0.5483
RAID04096738	LOC100133985	lncRNA	100133985	Homo sapiens	CDX2	protein	1045	Homo sapiens	ChIP-seq	ChIPBase	None	0.5483
RAID04096739	DSCR9	lncRNA	257203	Homo sapiens	HEY1	protein	23462	Homo sapiens	ChIP-seq	ChIPBase	None	0.5483
RAID04096811	SNHG1	lncRNA	23642	Homo sapiens	BCL11A	protein	53335	Homo sapiens	ChIP-seq	ChIPBase	None	0.5483
RAID04096826	MALAT1	lncRNA	378938	Homo sapiens	SPCS2	protein	9789	Homo sapiens	Microarray//RNA-seq	LncRNA2Target	None	0.6606
RAID04096841	BANCR	lncRNA	100885775	Homo sapiens	MAPKBP1	protein	23005	Homo sapiens	Microarray//RNA-seq	LncRNA2Target	None	0.6606
RAID04096867	TSTD3	lncRNA	100130890	Homo sapiens	UPF1	protein	5976	Homo sapiens	CLIP-seq	starBase	None	0.5483
RAID04096919	FENDRR	lncRNA	400550	Homo sapiens	LUM	protein	4060	Homo sapiens	Microarray//RNA-seq	LncRNA2Target	None	0.6606
RAID04096947	MALAT1	lncRNA	378938	Homo sapiens	WNT16	protein	51384	Homo sapiens	Microarray//RNA-seq	LncRNA2Target	None	0.6606
RAID04096971	TPTE	lncRNA	7179	Homo sapiens	SPI1	protein	6688	Homo sapiens	ChIP-seq	ChIPBase	None	0.5483
RAID04097018	FAM208B	lncRNA	54906	Homo sapiens	HEY1	protein	23462	Homo sapiens	ChIP-seq	ChIPBase	None	0.5483
RAID04097019	HCG18	lncRNA	414777	Homo sapiens	E2F6	protein	1876	Homo sapiens	ChIP-seq	ChIPBase	None	0.5483
RAID04097047	CIDECP	lncRNA	152302	Homo sapiens	ERG	protein	2078	Homo sapiens	ChIP-seq	ChIPBase	None	0.5483
RAID04097107	Ttc39aos1	lncRNA	102635290	Mus musculus	Fadd	protein	14082	Mus musculus	Western Blot//RT-PCR	LncRNA2Target	22155924	0.8808
RAID04097145	SNHG3	lncRNA	8420	Homo sapiens	FUS	protein	2521	Homo sapiens	CLIP-seq	starBase	None	0.5483
RAID04097197	FENDRR	lncRNA	400550	Homo sapiens	ADGRL2	protein	23266	Homo sapiens	Microarray//RNA-seq	LncRNA2Target	None	0.6606
RAID04097213	Mirt1	lncRNA	381232	Mus musculus	Gfi1b	protein	14582	Mus musculus	ChIP-seq	ChIPBase	None	0.5483
RAID04097230	A230028O05Rik	lncRNA	319487	Mus musculus	gr	protein	14781	Mus musculus	ChIP-seq	ChIPBase	None	0.5483
RAID04097234	ANCR	lncRNA	282	Homo sapiens	FN1	protein	2335	Homo sapiens	Microarray//RNA-seq	LncRNA2Target	None	0.6606
RAID04097261	LY86-AS1	lncRNA	285780	Homo sapiens	HNF4A	protein	3172	Homo sapiens	ChIP-seq	ChIPBase	None	0.5483
RAID04097288	TUG1	lncRNA	55000	Homo sapiens	CLDN8	protein	9073	Homo sapiens	Microarray//RNA-seq	LncRNA2Target	None	0.6606
RAID04097323	MALAT1	lncRNA	378938	Homo sapiens	KIT	protein	3815	Homo sapiens	Microarray//RNA-seq	LncRNA2Target	None	0.6606
RAID04097337	Malat1	lncRNA	72289	Mus musculus	Ezh2	protein	14056	Mus musculus	CLIP-seq	starBase	None	0.5483
RAID04097347	Gm16365	lncRNA	102634129	Mus musculus	Srsf1	protein	110809	Mus musculus	CLIP-seq	starBase	None	0.5483
RAID04097360	MEG3	lncRNA	55384	Homo sapiens	CDX2	protein	1045	Homo sapiens	ChIP-seq	ChIPBase	None	0.5483
RAID04097377	SNHG9	lncRNA	735301	Homo sapiens	STAT1	protein	6772	Homo sapiens	ChIP-seq	ChIPBase	None	0.5483
RAID04097378	Gm11378	lncRNA	100041312	Mus musculus	Suz12	protein	52615	Mus musculus	ChIP-seq	ChIPBase	None	0.5483
RAID04097415	LOC730101	lncRNA	730101	Homo sapiens	PBX3	protein	5090	Homo sapiens	ChIP-seq	ChIPBase	None	0.5483
RAID04097447	Gm12296	lncRNA	100093714	Mus musculus	Fus	protein	233908	Mus musculus	CLIP-seq	starBase	None	0.5483
RAID04097519	LINC00094	lncRNA	266655	Homo sapiens	MYC	protein	4609	Homo sapiens	ChIP-seq	ChIPBase	None	0.5483
RAID04097612	FENDRR	lncRNA	400550	Homo sapiens	WDR1	protein	9948	Homo sapiens	Microarray//RNA-seq	LncRNA2Target	None	0.6606
RAID04097628	9130213A22Rik	lncRNA	100038433	Mus musculus	Mtf2	protein	17765	Mus musculus	ChIP-seq	ChIPBase	None	0.5483
RAID04097694	MALAT1	lncRNA	378938	Homo sapiens	ZNF274	protein	10782	Homo sapiens	Microarray//RNA-seq	LncRNA2Target	None	0.6606
RAID04097734	TUG1	lncRNA	55000	Homo sapiens	ITGB3BP	protein	23421	Homo sapiens	Microarray//RNA-seq	LncRNA2Target	None	0.6606
RAID04097842	WWTR1-AS1	lncRNA	100128025	Homo sapiens	MAX	protein	4149	Homo sapiens	ChIP-seq	ChIPBase	None	0.5483
RAID04097885	LOC100505715	lncRNA	100505715	Homo sapiens	SETDB1	protein	9869	Homo sapiens	ChIP-seq	ChIPBase	None	0.5483
RAID04097914	FENDRR	lncRNA	400550	Homo sapiens	LY6K	protein	54742	Homo sapiens	Microarray//RNA-seq	LncRNA2Target	None	0.6606
RAID04097958	4933417D19Rik	lncRNA	71186	Mus musculus	Ctcf	protein	13018	Mus musculus	ChIP-seq	ChIPBase	None	0.5483
RAID04097982	PDE3B	lncRNA	5140	Homo sapiens	GATA6	protein	2627	Homo sapiens	ChIP-seq	ChIPBase	None	0.5483
RAID04098008	LOC100130899	lncRNA	100130899	Homo sapiens	HNF4A	protein	3172	Homo sapiens	ChIP-seq	ChIPBase	None	0.5483
RAID04098033	LOC648987	lncRNA	648987	Homo sapiens	CTCF	protein	10664	Homo sapiens	ChIP-seq	ChIPBase	None	0.5483
RAID04098068	CABIN1	lncRNA	23523	Homo sapiens	E2F1	protein	1869	Homo sapiens	ChIP-seq	ChIPBase	None	0.5483
RAID04098093	CRNDE	lncRNA	643911	Homo sapiens	C2CD4A	protein	145741	Homo sapiens	Microarray//RNA-seq	LncRNA2Target	None	0.6606
RAID04098109	HCG11	lncRNA	493812	Homo sapiens	ERG	protein	2078	Homo sapiens	ChIP-seq	ChIPBase	None	0.5483
RAID04098122	FENDRR	lncRNA	400550	Homo sapiens	CSNK2A1	protein	1457	Homo sapiens	Microarray//RNA-seq	LncRNA2Target	None	0.6606
RAID04098146	CRNDE	lncRNA	643911	Homo sapiens	TUBG1	protein	7283	Homo sapiens	Microarray//RNA-seq	LncRNA2Target	None	0.6606
RAID04098166	SNHG6	lncRNA	641638	Homo sapiens	PUM2	protein	23369	Homo sapiens	CLIP-seq	starBase	None	0.5483
RAID04098190	ERVK3-1	lncRNA	100507739	Homo sapiens	POU2F2	protein	5452	Homo sapiens	ChIP-seq	ChIPBase	None	0.5483
RAID04098243	TUG1	lncRNA	55000	Homo sapiens	SEMA3A	protein	10371	Homo sapiens	Microarray//RNA-seq	LncRNA2Target	None	0.6606
RAID04098262	FENDRR	lncRNA	400550	Homo sapiens	BAMBI	protein	25805	Homo sapiens	Microarray//RNA-seq	LncRNA2Target	None	0.6606
RAID04098285	MLLT4-AS1	lncRNA	653483	Homo sapiens	CEBPA	protein	1050	Homo sapiens	ChIP-seq	ChIPBase	None	0.5483
RAID04098288	Platr27	lncRNA	78316	Mus musculus	Cebpb	protein	12608	Mus musculus	ChIP-seq	ChIPBase	None	0.5483
RAID04098317	4933406I18Rik	lncRNA	71045	Mus musculus	Rbbp5	protein	213464	Mus musculus	ChIP-seq	ChIPBase	None	0.5483
RAID04098326	LINC00471	lncRNA	151477	Homo sapiens	U2AF2	protein	11338	Homo sapiens	CLIP-seq	starBase	None	0.5483
RAID04098349	Gm16896	lncRNA	100502844	Mus musculus	Cebpb	protein	12608	Mus musculus	ChIP-seq	ChIPBase	None	0.5483
RAID04098354	LOC647323	lncRNA	647323	Homo sapiens	SMARCB1	protein	6598	Homo sapiens	ChIP-seq	ChIPBase	None	0.5483
RAID04098368	SLIT2-IT1	lncRNA	100505893	Homo sapiens	NANOG	protein	79923	Homo sapiens	ChIP-seq	ChIPBase	None	0.5483
RAID04098443	Emc1	lncRNA	230866	Mus musculus	Kdm5a	protein	214899	Mus musculus	ChIP-seq	ChIPBase	None	0.5483
RAID04098468	MALAT1	lncRNA	378938	Homo sapiens	KIF17	protein	57576	Homo sapiens	Microarray//RNA-seq	LncRNA2Target	None	0.6606
RAID04098571	FENDRR	lncRNA	400550	Homo sapiens	KRT4	protein	3851	Homo sapiens	Microarray//RNA-seq	LncRNA2Target	None	0.6606
RAID04098653	9530026P05Rik	lncRNA	330385	Mus musculus	Tbx5	protein	21388	Mus musculus	ChIP-seq	ChIPBase	None	0.5483
RAID04098654	SNHG6	lncRNA	641638	Homo sapiens	FOSL2	protein	2355	Homo sapiens	ChIP-seq	ChIPBase	None	0.5483
RAID04098707	Xist	lncRNA	213742	Mus musculus	Ptbp1	protein	19205	Mus musculus	Mass spectrometry//Nucleic acid uv cross-linking assay	RAID	25915022	0.8808
RAID04098713	LINC00672	lncRNA	100505576	Homo sapiens	U2AF2	protein	11338	Homo sapiens	CLIP-seq	starBase	None	0.5483
RAID04098727	BANCR	lncRNA	100885775	Homo sapiens	TMED6	protein	146456	Homo sapiens	Microarray//RNA-seq	LncRNA2Target	None	0.6606
RAID04098763	Gm2529	lncRNA	100039975	Mus musculus	Ctcf	protein	13018	Mus musculus	ChIP-seq	ChIPBase	None	0.5483
RAID04098794	HCG18	lncRNA	414777	Homo sapiens	TCF12	protein	6938	Homo sapiens	ChIP-seq	ChIPBase	None	0.5483
RAID04098832	FENDRR	lncRNA	400550	Homo sapiens	NUP93	protein	9688	Homo sapiens	Microarray//RNA-seq	LncRNA2Target	None	0.6606
RAID04098842	MALAT1	lncRNA	378938	Homo sapiens	PSMC3	protein	5702	Homo sapiens	Microarray//RNA-seq	LncRNA2Target	None	0.6606
RAID04098856	Gm6277	lncRNA	621998	Mus musculus	Cebpb	protein	12608	Mus musculus	ChIP-seq	ChIPBase	None	0.5483
RAID04098863	AI504432	lncRNA	229694	Mus musculus	Hnrnpk	protein	15387	Mus musculus	CLIP-seq	starBase	None	0.5483
RAID04098934	PVT1	lncRNA	5820	Homo sapiens	SMAD4	protein	4089	Homo sapiens	ChIP-seq	ChIPBase	None	0.5483
RAID04098951	FLVCR1-AS1	lncRNA	642946	Homo sapiens	HNF4A	protein	3172	Homo sapiens	ChIP-seq	ChIPBase	None	0.5483
RAID04099007	LOC730101	lncRNA	730101	Homo sapiens	GATA6	protein	2627	Homo sapiens	ChIP-seq	ChIPBase	None	0.5483
RAID04099016	MIR3180-3	lncRNA	100422836	Homo sapiens	POU5F1	protein	5460	Homo sapiens	ChIP-seq	ChIPBase	None	0.5483
RAID04099042	Gm15348	lncRNA	100038554	Mus musculus	Cebpa	protein	12606	Mus musculus	ChIP-seq	ChIPBase	None	0.5483
RAID04099068	LINC00303	lncRNA	284573	Homo sapiens	CDX2	protein	1045	Homo sapiens	ChIP-seq	ChIPBase	None	0.5483
RAID04099098	ANKRD10-IT1	lncRNA	100505494	Homo sapiens	POU2F2	protein	5452	Homo sapiens	ChIP-seq	ChIPBase	None	0.5483
RAID04099128	TUG1	lncRNA	55000	Homo sapiens	SLC41A3	protein	54946	Homo sapiens	Microarray//RNA-seq	LncRNA2Target	None	0.6606
RAID04099138	LINC00475	lncRNA	158314	Homo sapiens	BATF	protein	10538	Homo sapiens	ChIP-seq	ChIPBase	None	0.5483
RAID04099139	LINC00237	lncRNA	101180898	Homo sapiens	BATF	protein	10538	Homo sapiens	ChIP-seq	ChIPBase	None	0.5483
RAID04099163	GYG1	lncRNA	2992	Homo sapiens	SMARCC2	protein	6601	Homo sapiens	ChIP-seq	ChIPBase	None	0.5483
RAID04099201	Emc1	lncRNA	230866	Mus musculus	Gata1	protein	14460	Mus musculus	ChIP-seq	ChIPBase	None	0.5483
RAID04099203	Gm11587	lncRNA	102638129	Mus musculus	Ep300	protein	328572	Mus musculus	ChIP-seq	ChIPBase	None	0.5483
RAID04099215	SNHG12	lncRNA	85028	Homo sapiens	IRF4	protein	3662	Homo sapiens	ChIP-seq	ChIPBase	None	0.5483
RAID04099220	TUG1	lncRNA	55000	Homo sapiens	NOV	protein	4856	Homo sapiens	Microarray//RNA-seq	LncRNA2Target	None	0.6606
RAID04099225	ZNF37BP	lncRNA	100129482	Homo sapiens	ZNF263	protein	10127	Homo sapiens	ChIP-seq	ChIPBase	None	0.5483
RAID04099258	LOC100132167	lncRNA	100132167	Homo sapiens	YY1	protein	7528	Homo sapiens	ChIP-seq	ChIPBase	None	0.5483
RAID04099344	LINC00173	lncRNA	100287569	Homo sapiens	NANOG	protein	79923	Homo sapiens	ChIP-seq	ChIPBase	None	0.5483
RAID04099415	B230344G16Rik	lncRNA	100038636	Mus musculus	Tbx5	protein	21388	Mus musculus	ChIP-seq	ChIPBase	None	0.5483
RAID04099421	MALAT1	lncRNA	378938	Homo sapiens	SNTB2	protein	6645	Homo sapiens	Microarray//RNA-seq	LncRNA2Target	None	0.6606
RAID04099469	MGC72080	lncRNA	389538	Homo sapiens	HNF4A	protein	3172	Homo sapiens	ChIP-seq	ChIPBase	None	0.5483
RAID04099493	LOC730101	lncRNA	730101	Homo sapiens	RAD21	protein	5885	Homo sapiens	ChIP-seq	ChIPBase	None	0.5483
RAID04099515	Gm16897	lncRNA	320400	Mus musculus	Zfx	protein	22764	Mus musculus	ChIP-seq	ChIPBase	None	0.5483
RAID04099520	4930426I24Rik	lncRNA	100504512	Mus musculus	Jarid2	protein	16468	Mus musculus	ChIP-seq	ChIPBase	None	0.5483
RAID04099541	Gm16712	lncRNA	100504333	Mus musculus	Pparg	protein	19016	Mus musculus	ChIP-seq	ChIPBase	None	0.5483
RAID04099567	TUG1	lncRNA	55000	Homo sapiens	TMEM159	protein	57146	Homo sapiens	Microarray//RNA-seq	LncRNA2Target	None	0.6606
RAID04099649	4930578M01Rik	lncRNA	75951	Mus musculus	Erg	protein	13876	Mus musculus	ChIP-seq	ChIPBase	None	0.5483
RAID04099666	TUG1	lncRNA	55000	Homo sapiens	SLC25A30	protein	253512	Homo sapiens	Microarray//RNA-seq	LncRNA2Target	None	0.6606
RAID04099674	TUG1	lncRNA	55000	Homo sapiens	EMC4	protein	51234	Homo sapiens	Microarray//RNA-seq	LncRNA2Target	None	0.6606
RAID04099680	LOC645166	lncRNA	645166	Homo sapiens	NANOG	protein	79923	Homo sapiens	ChIP-seq	ChIPBase	None	0.5483
RAID04099749	FAM212B	lncRNA	55924	Homo sapiens	POU2F2	protein	5452	Homo sapiens	ChIP-seq	ChIPBase	None	0.5483
RAID04099767	FARP1	lncRNA	10160	Homo sapiens	TAF1	protein	6872	Homo sapiens	ChIP-seq	ChIPBase	None	0.5483
RAID04099783	Gm17281	lncRNA	100503319	Mus musculus	Klf4	protein	16600	Mus musculus	ChIP-seq	ChIPBase	None	0.5483
RAID04099810	TUG1	lncRNA	55000	Homo sapiens	JARID2	protein	3720	Homo sapiens	Microarray//RNA-seq	LncRNA2Target	None	0.6606
RAID04099840	LINC00205	lncRNA	102723489	Homo sapiens	CDX2	protein	1045	Homo sapiens	ChIP-seq	ChIPBase	None	0.5483
RAID04099887	HECW1	lncRNA	23072	Homo sapiens	SPDEF	protein	25803	Homo sapiens	ChIP-seq	ChIPBase	None	0.5483
RAID04099916	CA13	lncRNA	377677	Homo sapiens	ERG	protein	2078	Homo sapiens	ChIP-seq	ChIPBase	None	0.5483
RAID04099918	TUG1	lncRNA	55000	Homo sapiens	DNMT3B	protein	1789	Homo sapiens	Microarray//RNA-seq	LncRNA2Target	None	0.6606
RAID04099931	Rab26os	lncRNA	75614	Mus musculus	Fus	protein	233908	Mus musculus	CLIP-seq	starBase	None	0.5483
RAID04099946	LINC00322	lncRNA	100126693	Homo sapiens	TFAP2A	protein	7020	Homo sapiens	ChIP-seq	ChIPBase	None	0.5483
RAID04099983	FENDRR	lncRNA	400550	Homo sapiens	GRAMD1A	protein	57655	Homo sapiens	Microarray//RNA-seq	LncRNA2Target	None	0.6606
RAID04099990	G730013B05Rik	lncRNA	619312	Mus musculus	Myct1	protein	68632	Mus musculus	Microarray//RNA-seq	LncRNA2Target	None	0.6606
RAID04100012	CSAG4	lncRNA	100130935	Homo sapiens	U2AF2	protein	11338	Homo sapiens	CLIP-seq	starBase	None	0.5483
RAID04100019	G730013B05Rik	lncRNA	619312	Mus musculus	Dph3	protein	105638	Mus musculus	Microarray//RNA-seq	LncRNA2Target	None	0.6606
RAID04100061	TUG1	lncRNA	55000	Homo sapiens	NDE1	protein	54820	Homo sapiens	Microarray//RNA-seq	LncRNA2Target	None	0.6606
RAID04100101	SPSB4	lncRNA	92369	Homo sapiens	TCF7L2	protein	6934	Homo sapiens	ChIP-seq	ChIPBase	None	0.5483
RAID04100133	TUSC8	lncRNA	400128	Homo sapiens	HEY1	protein	23462	Homo sapiens	ChIP-seq	ChIPBase	None	0.5483
RAID04100250	FENDRR	lncRNA	400550	Homo sapiens	DSC1	protein	1823	Homo sapiens	Microarray//RNA-seq	LncRNA2Target	None	0.6606
RAID04100284	WHAMMP2	lncRNA	440253	Homo sapiens	HEY1	protein	23462	Homo sapiens	ChIP-seq	ChIPBase	None	0.5483
RAID04100315	FENDRR	lncRNA	400550	Homo sapiens	WSB2	protein	55884	Homo sapiens	Microarray//RNA-seq	LncRNA2Target	None	0.6606
RAID04100337	CRNDE	lncRNA	643911	Homo sapiens	KIT	protein	3815	Homo sapiens	Microarray//RNA-seq	LncRNA2Target	None	0.6606
RAID04100348	CRNDE	lncRNA	643911	Homo sapiens	FH	protein	2271	Homo sapiens	Microarray//RNA-seq	LncRNA2Target	None	0.6606
RAID04100387	ANP32A	lncRNA	8125	Homo sapiens	CEBPB	protein	1051	Homo sapiens	ChIP-seq	ChIPBase	None	0.5483
RAID04100390	MALAT1	lncRNA	378938	Homo sapiens	FAM175A	protein	84142	Homo sapiens	Microarray//RNA-seq	LncRNA2Target	None	0.6606
RAID04100437	TUG1	lncRNA	55000	Homo sapiens	RAD51AP1	protein	10635	Homo sapiens	Microarray//RNA-seq	LncRNA2Target	None	0.6606
RAID04100459	LOC643441	lncRNA	643441	Homo sapiens	JUN	protein	3725	Homo sapiens	ChIP-seq	ChIPBase	None	0.5483
RAID04100507	TUG1	lncRNA	55000	Homo sapiens	DHCR24	protein	1718	Homo sapiens	Microarray//RNA-seq	LncRNA2Target	None	0.6606
RAID04100510	C14orf169	lncRNA	79697	Homo sapiens	IGF2BP3	protein	10643	Homo sapiens	CLIP-seq	starBase	None	0.5483
RAID04100514	CDKN2B-AS1	lncRNA	100048912	Homo sapiens	VAMP3	protein	9341	Homo sapiens	Western Blot//RT-PCR	LncRNA2Target	23813974	0.8808
RAID04100522	ENDOV	lncRNA	284131	Homo sapiens	NRF1	protein	4899	Homo sapiens	ChIP-seq	ChIPBase	None	0.5483
RAID04100535	TSSC2	lncRNA	650368	Homo sapiens	JUND	protein	3727	Homo sapiens	ChIP-seq	ChIPBase	None	0.5483
RAID04100630	TUG1	lncRNA	55000	Homo sapiens	C16orf52	protein	730094	Homo sapiens	Microarray//RNA-seq	LncRNA2Target	None	0.6606
RAID04100641	CRNDE	lncRNA	643911	Homo sapiens	C12orf49	protein	79794	Homo sapiens	Microarray//RNA-seq	LncRNA2Target	None	0.6606
RAID04100672	MGST3	lncRNA	4259	Homo sapiens	HEY1	protein	23462	Homo sapiens	ChIP-seq	ChIPBase	None	0.5483
RAID04100679	2610035F20Rik	lncRNA	69248	Mus musculus	Suz12	protein	52615	Mus musculus	ChIP-seq	ChIPBase	None	0.5483
RAID04100699	4732491K20Rik	lncRNA	224523	Mus musculus	Cebpb	protein	12608	Mus musculus	ChIP-seq	ChIPBase	None	0.5483
RAID04100722	1810019N24Rik	lncRNA	69086	Mus musculus	Spi1	protein	20375	Mus musculus	ChIP-seq	ChIPBase	None	0.5483
RAID04100729	4930552P12Rik	lncRNA	77594	Mus musculus	Foxa2	protein	15376	Mus musculus	ChIP-seq	ChIPBase	None	0.5483
RAID04100797	Snhg5	lncRNA	72655	Mus musculus	Esrrb	protein	26380	Mus musculus	ChIP-seq	ChIPBase	None	0.5483
RAID04100812	NORAD	lncRNA	647979	Homo sapiens	LIN28A	protein	79727	Homo sapiens	CLIP-seq	starBase	None	0.5483
RAID04100894	LOC439994	lncRNA	439994	Homo sapiens	ERG	protein	2078	Homo sapiens	ChIP-seq	ChIPBase	None	0.5483
RAID04100926	CRNDE	lncRNA	643911	Homo sapiens	CAMK1	protein	8536	Homo sapiens	Microarray//RNA-seq	LncRNA2Target	None	0.6606
RAID04100937	LINC00648	lncRNA	100506433	Homo sapiens	LIN28B	protein	389421	Homo sapiens	CLIP-seq	starBase	None	0.5483
RAID04100952	KIAA0825	lncRNA	285600	Homo sapiens	NANOG	protein	79923	Homo sapiens	ChIP-seq	ChIPBase	None	0.5483
RAID04100967	MALAT1	lncRNA	378938	Homo sapiens	LOC100129280	protein	100129280	Homo sapiens	Microarray//RNA-seq	LncRNA2Target	None	0.6606
RAID04100981	1700112J16Rik	lncRNA	76628	Mus musculus	Foxa2	protein	15376	Mus musculus	ChIP-seq	ChIPBase	None	0.5483
RAID04100985	FAR1-IT1	lncRNA	106478978	Homo sapiens	EIF4A3	protein	9775	Homo sapiens	CLIP-seq	starBase	None	0.5483
RAID04101016	G730013B05Rik	lncRNA	619312	Mus musculus	Pdzrn3	protein	55983	Mus musculus	Microarray//RNA-seq	LncRNA2Target	None	0.6606
RAID04101024	MALAT1	lncRNA	378938	Homo sapiens	SPDYA	protein	245711	Homo sapiens	Microarray//RNA-seq	LncRNA2Target	None	0.6606
RAID04101027	SNHG11	lncRNA	128439	Homo sapiens	EIF4A3	protein	9775	Homo sapiens	CLIP-seq	starBase	None	0.5483
RAID04101081	UG0898H09	lncRNA	643763	Homo sapiens	TAF1	protein	6872	Homo sapiens	ChIP-seq	ChIPBase	None	0.5483
RAID04101132	MALAT1	lncRNA	378938	Homo sapiens	SLC2A10	protein	81031	Homo sapiens	Microarray//RNA-seq	LncRNA2Target	None	0.6606
RAID04101192	2810002D19Rik	lncRNA	66457	Mus musculus	Fus	protein	233908	Mus musculus	CLIP-seq	starBase	None	0.5483
RAID04101200	ANCR	lncRNA	282	Homo sapiens	GPX3	protein	2878	Homo sapiens	Microarray//RNA-seq	LncRNA2Target	None	0.6606
RAID04101238	5730420D15Rik	lncRNA	70523	Mus musculus	Pparg	protein	19016	Mus musculus	ChIP-seq	ChIPBase	None	0.5483
RAID04101290	1010001N08Rik	lncRNA	68434	Mus musculus	Pparg	protein	19016	Mus musculus	ChIP-seq	ChIPBase	None	0.5483
RAID04101371	TUG1	lncRNA	55000	Homo sapiens	HBEGF	protein	1839	Homo sapiens	Microarray//RNA-seq	LncRNA2Target	None	0.6606
RAID04101392	GLB1	lncRNA	2720	Homo sapiens	EP300	protein	2033	Homo sapiens	ChIP-seq	ChIPBase	None	0.5483
RAID04101454	FENDRR	lncRNA	400550	Homo sapiens	POLA2	protein	23649	Homo sapiens	Microarray//RNA-seq	LncRNA2Target	None	0.6606
RAID04101487	HAR1A	lncRNA	768096	Homo sapiens	PBX3	protein	5090	Homo sapiens	ChIP-seq	ChIPBase	None	0.5483
RAID04101488	LOC285696	lncRNA	285696	Homo sapiens	JUND	protein	3727	Homo sapiens	ChIP-seq	ChIPBase	None	0.5483
RAID04101494	DDR1-AS1	lncRNA	414771	Homo sapiens	FOSL2	protein	2355	Homo sapiens	ChIP-seq	ChIPBase	None	0.5483
RAID04101512	ANCR	lncRNA	282	Homo sapiens	NOG	protein	9241	Homo sapiens	Microarray//RNA-seq	LncRNA2Target	None	0.6606
RAID04101533	E030044B06Rik	lncRNA	381223	Mus musculus	Tcf3	protein	21423	Mus musculus	ChIP-seq	ChIPBase	None	0.5483
RAID04101549	MACROD2-AS1	lncRNA	100379174	Homo sapiens	E2F4	protein	1874	Homo sapiens	ChIP-seq	ChIPBase	None	0.5483
RAID04101570	VPS11	lncRNA	55823	Homo sapiens	PTBP1	protein	5725	Homo sapiens	CLIP-seq	starBase	None	0.5483
RAID04101574	LINC00630	lncRNA	100287765	Homo sapiens	UPF1	protein	5976	Homo sapiens	CLIP-seq	starBase	None	0.5483
RAID04101629	NBPF25P	lncRNA	101929780	Homo sapiens	TAF1	protein	6872	Homo sapiens	ChIP-seq	ChIPBase	None	0.5483
RAID04101631	CRNDE	lncRNA	643911	Homo sapiens	ZNF512	protein	84450	Homo sapiens	Microarray//RNA-seq	LncRNA2Target	None	0.6606
RAID04101703	Gm2694	lncRNA	100040294	Mus musculus	Cpxm2	protein	55987	Mus musculus	Microarray//RNA-seq	LncRNA2Target	None	0.6606
RAID04101711	CIDECP	lncRNA	152302	Homo sapiens	EIF4A3	protein	9775	Homo sapiens	CLIP-seq	starBase	None	0.5483
RAID04101713	MIR600HG	lncRNA	81571	Homo sapiens	IGF2BP2	protein	10644	Homo sapiens	CLIP-seq	starBase	None	0.5483
RAID04101715	MALAT1	lncRNA	378938	Homo sapiens	SEC62	protein	7095	Homo sapiens	Microarray//RNA-seq	LncRNA2Target	None	0.6606
RAID04101750	SMCR5	lncRNA	140771	Homo sapiens	EIF4A3	protein	9775	Homo sapiens	CLIP-seq	starBase	None	0.5483
RAID04101788	Gm17586	lncRNA	100504040	Mus musculus	E2f1	protein	13555	Mus musculus	ChIP-seq	ChIPBase	None	0.5483
RAID04101827	MALAT1	lncRNA	378938	Homo sapiens	DSP	protein	1832	Homo sapiens	Microarray//RNA-seq	LncRNA2Target	None	0.6606
RAID04101858	CRNDE	lncRNA	643911	Homo sapiens	RUVBL2	protein	10856	Homo sapiens	Microarray//RNA-seq	LncRNA2Target	None	0.6606
RAID04101874	RAMP2-AS1	lncRNA	100190938	Homo sapiens	EIF4A3	protein	9775	Homo sapiens	CLIP-seq	starBase	None	0.5483
RAID04101885	MALAT1	lncRNA	378938	Homo sapiens	PHACTR2	protein	9749	Homo sapiens	Microarray//RNA-seq	LncRNA2Target	None	0.6606
RAID04101940	C530050E15Rik	lncRNA	320489	Mus musculus	Runx1	protein	12394	Mus musculus	ChIP-seq	ChIPBase	None	0.5483
RAID04101954	SNHG11	lncRNA	128439	Homo sapiens	SMAD4	protein	4089	Homo sapiens	ChIP-seq	ChIPBase	None	0.5483
RAID04101978	G730013B05Rik	lncRNA	619312	Mus musculus	Slit2	protein	20563	Mus musculus	Microarray//RNA-seq	LncRNA2Target	None	0.6606
RAID04101987	FENDRR	lncRNA	400550	Homo sapiens	BACE2	protein	25825	Homo sapiens	Microarray//RNA-seq	LncRNA2Target	None	0.6606
RAID04102014	TUG1	lncRNA	55000	Homo sapiens	TRIM25	protein	7706	Homo sapiens	Microarray//RNA-seq	LncRNA2Target	None	0.6606
RAID04102075	2610020C07Rik	lncRNA	69918	Mus musculus	E2f1	protein	13555	Mus musculus	ChIP-seq	ChIPBase	None	0.5483
RAID04102103	LOC440934	lncRNA	440934	Homo sapiens	E2F4	protein	1874	Homo sapiens	ChIP-seq	ChIPBase	None	0.5483
RAID04102104	LINC00476	lncRNA	100128782	Homo sapiens	SMARCC1	protein	6599	Homo sapiens	ChIP-seq	ChIPBase	None	0.5483
RAID04102119	FLJ42351	lncRNA	400999	Homo sapiens	SMAD4	protein	4089	Homo sapiens	ChIP-seq	ChIPBase	None	0.5483
RAID04102147	FENDRR	lncRNA	400550	Homo sapiens	DTHD1	protein	401124	Homo sapiens	Microarray//RNA-seq	LncRNA2Target	None	0.6606
RAID04102156	CRNDE	lncRNA	643911	Homo sapiens	A1BG	protein	1	Homo sapiens	Microarray//RNA-seq	LncRNA2Target	None	0.6606
RAID04102193	TUG1	lncRNA	55000	Homo sapiens	SMAD6	protein	4091	Homo sapiens	Microarray//RNA-seq	LncRNA2Target	None	0.6606
RAID04102206	GAS5	lncRNA	60674	Homo sapiens	BCL3	protein	602	Homo sapiens	ChIP-seq	ChIPBase	None	0.5483
RAID04102207	ZFAS1	lncRNA	441951	Homo sapiens	SMARCC2	protein	6601	Homo sapiens	ChIP-seq	ChIPBase	None	0.5483
RAID04102269	ANCR	lncRNA	282	Homo sapiens	KCNN4	protein	3783	Homo sapiens	Microarray//RNA-seq	LncRNA2Target	None	0.6606
RAID04102270	CRNDE	lncRNA	643911	Homo sapiens	MEX3A	protein	92312	Homo sapiens	Microarray//RNA-seq	LncRNA2Target	None	0.6606
RAID04102367	FAM212B	lncRNA	55924	Homo sapiens	E2F6	protein	1876	Homo sapiens	ChIP-seq	ChIPBase	None	0.5483
RAID04102440	FENDRR	lncRNA	400550	Homo sapiens	ERMARD	protein	55780	Homo sapiens	Microarray//RNA-seq	LncRNA2Target	None	0.6606
RAID04102448	Fendrr	lncRNA	68790	Mus musculus	Rbm4	protein	19653	Mus musculus	Microarray//RNA-seq	LncRNA2Target	None	0.6606
RAID04102467	MALAT1	lncRNA	378938	Homo sapiens	PTOV1	protein	53635	Homo sapiens	Microarray//RNA-seq	LncRNA2Target	None	0.6606
RAID04102527	MLLT4-AS1	lncRNA	653483	Homo sapiens	E2F6	protein	1876	Homo sapiens	ChIP-seq	ChIPBase	None	0.5483
RAID04102559	AU019990	lncRNA	767814	Mus musculus	Pparg	protein	19016	Mus musculus	ChIP-seq	ChIPBase	None	0.5483
RAID04102630	2010015M23Rik	lncRNA	72087	Mus musculus	Fli1	protein	14247	Mus musculus	ChIP-seq	ChIPBase	None	0.5483
RAID04102638	LOC400620	lncRNA	400620	Homo sapiens	NANOG	protein	79923	Homo sapiens	ChIP-seq	ChIPBase	None	0.5483
RAID04102657	FENDRR	lncRNA	400550	Homo sapiens	MEST	protein	4232	Homo sapiens	Microarray//RNA-seq	LncRNA2Target	None	0.6606
RAID04102661	TUG1	lncRNA	55000	Homo sapiens	IFT88	protein	8100	Homo sapiens	Microarray//RNA-seq	LncRNA2Target	None	0.6606
RAID04102706	AI115009	lncRNA	99542	Mus musculus	Ezh2	protein	14056	Mus musculus	ChIP-seq	ChIPBase	None	0.5483
RAID04102714	TUG1	lncRNA	55000	Homo sapiens	ZNF618	protein	114991	Homo sapiens	Microarray//RNA-seq	LncRNA2Target	None	0.6606
RAID04102743	FENDRR	lncRNA	400550	Homo sapiens	DIMT1	protein	27292	Homo sapiens	Microarray//RNA-seq	LncRNA2Target	None	0.6606
RAID04102787	Gm17586	lncRNA	100504040	Mus musculus	Tbx5	protein	21388	Mus musculus	ChIP-seq	ChIPBase	None	0.5483
RAID04102811	CNPY4	lncRNA	245812	Homo sapiens	SIX5	protein	147912	Homo sapiens	ChIP-seq	ChIPBase	None	0.5483
RAID04102813	GPC5-IT1	lncRNA	100874293	Homo sapiens	EBF1	protein	1879	Homo sapiens	ChIP-seq	ChIPBase	None	0.5483
RAID04102830	MALAT1	lncRNA	378938	Homo sapiens	DOT1L	protein	84444	Homo sapiens	Microarray//RNA-seq	LncRNA2Target	None	0.6606
RAID04102875	FENDRR	lncRNA	400550	Homo sapiens	BMP4	protein	652	Homo sapiens	Microarray//RNA-seq	LncRNA2Target	None	0.6606
RAID04102879	Gm17281	lncRNA	100503319	Mus musculus	Suz12	protein	52615	Mus musculus	ChIP-seq	ChIPBase	None	0.5483
RAID04102912	5031425F14Rik	lncRNA	319684	Mus musculus	Cebpa	protein	12606	Mus musculus	ChIP-seq	ChIPBase	None	0.5483
RAID04102921	Malat1	lncRNA	72289	Mus musculus	Cebpa	protein	12606	Mus musculus	ChIP-seq	ChIPBase	None	0.5483
RAID04102962	ANCR	lncRNA	282	Homo sapiens	AQP9	protein	366	Homo sapiens	Microarray//RNA-seq	LncRNA2Target	None	0.6606
RAID04102972	MALAT1	lncRNA	378938	Homo sapiens	DPYSL2	protein	1808	Homo sapiens	Microarray//RNA-seq	LncRNA2Target	None	0.6606
RAID04103018	Gm16755	lncRNA	100861766	Mus musculus	Srf	protein	20807	Mus musculus	ChIP-seq	ChIPBase	None	0.5483
RAID04103027	FENDRR	lncRNA	400550	Homo sapiens	KIF18A	protein	81930	Homo sapiens	Microarray//RNA-seq	LncRNA2Target	None	0.6606
RAID04103139	TUG1	lncRNA	55000	Homo sapiens	IGF2BP1	protein	10642	Homo sapiens	CLIP-seq	starBase	None	0.5483
RAID04103144	PKI55	lncRNA	150967	Homo sapiens	CDX2	protein	1045	Homo sapiens	ChIP-seq	ChIPBase	None	0.5483
RAID04103159	TUG1	lncRNA	55000	Homo sapiens	HLTF	protein	6596	Homo sapiens	Microarray//RNA-seq	LncRNA2Target	None	0.6606
RAID04103170	ANCR	lncRNA	282	Homo sapiens	CDSN	protein	1041	Homo sapiens	Microarray//RNA-seq	LncRNA2Target	None	0.6606
RAID04103181	FENDRR	lncRNA	400550	Homo sapiens	PET100	protein	100131801	Homo sapiens	Microarray//RNA-seq	LncRNA2Target	None	0.6606
RAID04103264	HEIH	lncRNA	100859930	Homo sapiens	CDKN1A	protein	1026	Homo sapiens	Western Blot//RT-PCR	LncRNA2Target	21769904	0.8808
RAID04103295	MALAT1	lncRNA	378938	Homo sapiens	ZNF585A	protein	199704	Homo sapiens	Microarray//RNA-seq	LncRNA2Target	None	0.6606
RAID04103312	LINC00094	lncRNA	266655	Homo sapiens	LIN28A	protein	79727	Homo sapiens	CLIP-seq	starBase	None	0.5483
RAID04103334	OIP5-AS1	lncRNA	729082	Homo sapiens	PTBP1	protein	5725	Homo sapiens	CLIP-seq	starBase	None	0.5483
RAID04103362	FENDRR	lncRNA	400550	Homo sapiens	PARVA	protein	55742	Homo sapiens	Microarray//RNA-seq	LncRNA2Target	None	0.6606
RAID04103459	MYC	lncRNA	4609	Homo sapiens	NANOG	protein	79923	Homo sapiens	ChIP-seq	ChIPBase	None	0.5483
RAID04103489	FENDRR	lncRNA	400550	Homo sapiens	PAQR7	protein	164091	Homo sapiens	Microarray//RNA-seq	LncRNA2Target	None	0.6606
RAID04103496	G730013B05Rik	lncRNA	619312	Mus musculus	Gabarap	protein	56486	Mus musculus	Microarray//RNA-seq	LncRNA2Target	None	0.6606
RAID04103512	HCG16	lncRNA	414766	Homo sapiens	NFYA	protein	4800	Homo sapiens	ChIP-seq	ChIPBase	None	0.5483
RAID04103550	LINC00857	lncRNA	439990	Homo sapiens	EIF4A3	protein	9775	Homo sapiens	CLIP-seq	starBase	None	0.5483
RAID04103593	Gm16897	lncRNA	320400	Mus musculus	Spi1	protein	20375	Mus musculus	ChIP-seq	ChIPBase	None	0.5483
RAID04103632	3110099E03Rik	lncRNA	100043232	Mus musculus	Cebpa	protein	12606	Mus musculus	ChIP-seq	ChIPBase	None	0.5483
RAID04103755	Gm16351	lncRNA	102632686	Mus musculus	Cebpa	protein	12606	Mus musculus	ChIP-seq	ChIPBase	None	0.5483
RAID04103781	DLG2	lncRNA	1740	Homo sapiens	SMARCB1	protein	6598	Homo sapiens	ChIP-seq	ChIPBase	None	0.5483
RAID04103799	LINC00162	lncRNA	378825	Homo sapiens	MYC	protein	4609	Homo sapiens	ChIP-seq	ChIPBase	None	0.5483
RAID04103815	STAMBPL1	lncRNA	57559	Homo sapiens	MAX	protein	4149	Homo sapiens	ChIP-seq	ChIPBase	None	0.5483
RAID04103824	MALAT1	lncRNA	378938	Homo sapiens	SMAD7	protein	4092	Homo sapiens	Microarray//RNA-seq	LncRNA2Target	None	0.6606
RAID04103904	BANCR	lncRNA	100885775	Homo sapiens	PPP2R3B	protein	28227	Homo sapiens	Microarray//RNA-seq	LncRNA2Target	None	0.6606
RAID04103915	SCUBE1	lncRNA	80274	Homo sapiens	FOSL2	protein	2355	Homo sapiens	ChIP-seq	ChIPBase	None	0.5483
RAID04103939	FENDRR	lncRNA	400550	Homo sapiens	NCOA7	protein	135112	Homo sapiens	Microarray//RNA-seq	LncRNA2Target	None	0.6606
RAID04103955	LOC145474	lncRNA	145474	Homo sapiens	SPI1	protein	6688	Homo sapiens	ChIP-seq	ChIPBase	None	0.5483
RAID04103957	TUG1	lncRNA	55000	Homo sapiens	NR2F2	protein	7026	Homo sapiens	Microarray//RNA-seq	LncRNA2Target	None	0.6606
RAID04104019	LOC100505918	lncRNA	100505918	Homo sapiens	FOXH1	protein	8928	Homo sapiens	ChIP-seq	ChIPBase	None	0.5483
RAID04104052	Runx2os1	lncRNA	100038355	Mus musculus	Fus	protein	233908	Mus musculus	CLIP-seq	starBase	None	0.5483
RAID04104063	TMEM191A	lncRNA	84222	Homo sapiens	ETS1	protein	2113	Homo sapiens	ChIP-seq	ChIPBase	None	0.5483
RAID04104072	MALAT1	lncRNA	378938	Homo sapiens	SUPT3H	protein	8464	Homo sapiens	Microarray//RNA-seq	LncRNA2Target	None	0.6606
RAID04104101	CRNDE	lncRNA	643911	Homo sapiens	CCBE1	protein	147372	Homo sapiens	Microarray//RNA-seq	LncRNA2Target	None	0.6606
RAID04104127	ANCR	lncRNA	282	Homo sapiens	HR	protein	55806	Homo sapiens	Microarray//RNA-seq	LncRNA2Target	None	0.6606
RAID04104148	LOC553137	lncRNA	553137	Homo sapiens	HNF4A	protein	3172	Homo sapiens	ChIP-seq	ChIPBase	None	0.5483
RAID04104191	EAF1-AS1	lncRNA	100873956	Homo sapiens	EIF4A3	protein	9775	Homo sapiens	CLIP-seq	starBase	None	0.5483
RAID04104212	Gm15408	lncRNA	100503307	Mus musculus	Tbx5	protein	21388	Mus musculus	ChIP-seq	ChIPBase	None	0.5483
RAID04104232	FAM208B	lncRNA	54906	Homo sapiens	IRF4	protein	3662	Homo sapiens	ChIP-seq	ChIPBase	None	0.5483
RAID04104234	MALAT1	lncRNA	378938	Homo sapiens	TM9SF4	protein	9777	Homo sapiens	Microarray//RNA-seq	LncRNA2Target	None	0.6606
RAID04104241	LINC00339	lncRNA	29092	Homo sapiens	STAT1	protein	6772	Homo sapiens	ChIP-seq	ChIPBase	None	0.5483
RAID04104250	Gm12536	lncRNA	102638251	Mus musculus	Cebpa	protein	12606	Mus musculus	ChIP-seq	ChIPBase	None	0.5483
RAID04104262	9530052C20Rik	lncRNA	320229	Mus musculus	Foxa2	protein	15376	Mus musculus	ChIP-seq	ChIPBase	None	0.5483
RAID04104268	Platr27	lncRNA	78316	Mus musculus	E2f1	protein	13555	Mus musculus	ChIP-seq	ChIPBase	None	0.5483
RAID04104269	TPD52	lncRNA	7163	Homo sapiens	IRF4	protein	3662	Homo sapiens	ChIP-seq	ChIPBase	None	0.5483
RAID04104284	ERVK13-1	lncRNA	100507321	Homo sapiens	EIF4A3	protein	9775	Homo sapiens	CLIP-seq	starBase	None	0.5483
RAID04104308	MALAT1	lncRNA	378938	Homo sapiens	HPSE	protein	10855	Homo sapiens	EMSA (electrophoretic mobility shift assay)//RT-PCR	RAID	19625619	0.8808
RAID04104348	ANCR	lncRNA	282	Homo sapiens	ETV4	protein	2118	Homo sapiens	Microarray//RNA-seq	LncRNA2Target	None	0.6606
RAID04104375	ITCH-IT1	lncRNA	100874302	Homo sapiens	EIF4A3	protein	9775	Homo sapiens	CLIP-seq	starBase	None	0.5483
RAID04104429	SMPD4P1	lncRNA	645280	Homo sapiens	FUS	protein	2521	Homo sapiens	CLIP-seq	starBase	None	0.5483
RAID04104436	CRNDE	lncRNA	643911	Homo sapiens	LIFR	protein	3977	Homo sapiens	Microarray//RNA-seq	LncRNA2Target	None	0.6606
RAID04104450	PRIM2	lncRNA	5558	Homo sapiens	TAF1	protein	6872	Homo sapiens	ChIP-seq	ChIPBase	None	0.5483
RAID04104488	TUG1	lncRNA	55000	Homo sapiens	GSDMB	protein	55876	Homo sapiens	Microarray//RNA-seq	LncRNA2Target	None	0.6606
RAID04104518	LINC00158	lncRNA	54072	Homo sapiens	CDX2	protein	1045	Homo sapiens	ChIP-seq	ChIPBase	None	0.5483
RAID04104537	LOC389247	lncRNA	389247	Homo sapiens	TAF1	protein	6872	Homo sapiens	ChIP-seq	ChIPBase	None	0.5483
RAID04104572	SNHG20	lncRNA	654434	Homo sapiens	CAPRIN1	protein	4076	Homo sapiens	CLIP-seq	starBase	None	0.5483
RAID04104661	FENDRR	lncRNA	400550	Homo sapiens	CARS2	protein	79587	Homo sapiens	Microarray//RNA-seq	LncRNA2Target	None	0.6606
RAID04104690	Raxos1	lncRNA	360222	Mus musculus	Wdr5	protein	140858	Mus musculus	ChIP-seq	ChIPBase	None	0.5483
RAID04104770	CRNDE	lncRNA	643911	Homo sapiens	POLR3F	protein	10621	Homo sapiens	Microarray//RNA-seq	LncRNA2Target	None	0.6606
RAID04104794	Mir706	lncRNA	735290	Mus musculus	Tcf3	protein	21423	Mus musculus	ChIP-seq	ChIPBase	None	0.5483
RAID04104797	LINC00476	lncRNA	100128782	Homo sapiens	STAT2	protein	6773	Homo sapiens	ChIP-seq	ChIPBase	None	0.5483
RAID04104861	6030442K20Rik	lncRNA	77876	Mus musculus	Cebpb	protein	12608	Mus musculus	ChIP-seq	ChIPBase	None	0.5483
RAID04104936	H19	lncRNA	283120	Homo sapiens	BAX	protein	581	Homo sapiens	Western Blot//RT-PCR	LncRNA2Target	22776265	0.8808
RAID04104954	LOC100130992	lncRNA	100130992	Homo sapiens	TAF1	protein	6872	Homo sapiens	ChIP-seq	ChIPBase	None	0.5483
RAID04104962	LINC00319	lncRNA	284836	Homo sapiens	FOSL2	protein	2355	Homo sapiens	ChIP-seq	ChIPBase	None	0.5483
RAID04104969	MALAT1	lncRNA	378938	Homo sapiens	RB1CC1	protein	9821	Homo sapiens	Microarray//RNA-seq	LncRNA2Target	None	0.6606
RAID04105032	Gm17315	lncRNA	100502912	Mus musculus	Klf4	protein	16600	Mus musculus	ChIP-seq	ChIPBase	None	0.5483
RAID04105113	LOC400940	lncRNA	400940	Homo sapiens	REST	protein	5978	Homo sapiens	ChIP-seq	ChIPBase	None	0.5483
RAID04105125	MALAT1	lncRNA	378938	Homo sapiens	REV3L	protein	5980	Homo sapiens	Microarray//RNA-seq	LncRNA2Target	None	0.6606
RAID04105131	TUG1	lncRNA	55000	Homo sapiens	FKBP5	protein	2289	Homo sapiens	Microarray//RNA-seq	LncRNA2Target	None	0.6606
RAID04105132	MALAT1	lncRNA	378938	Homo sapiens	HIST1H3A	protein	8350	Homo sapiens	Microarray//RNA-seq	LncRNA2Target	None	0.6606
RAID04105240	CWC15	lncRNA	51503	Homo sapiens	NCBP3	protein	55421	Homo sapiens	CLIP-seq	starBase	None	0.5483
RAID04105247	FLJ42351	lncRNA	400999	Homo sapiens	JUN	protein	3725	Homo sapiens	ChIP-seq	ChIPBase	None	0.5483
RAID04105249	RHPN1-AS1	lncRNA	78998	Homo sapiens	EBF1	protein	1879	Homo sapiens	ChIP-seq	ChIPBase	None	0.5483
RAID04105259	SNHG6	lncRNA	641638	Homo sapiens	ELAVL1	protein	1994	Homo sapiens	CLIP-seq	starBase	None	0.5483
RAID04105310	LOC729970	lncRNA	729970	Homo sapiens	FOXH1	protein	8928	Homo sapiens	ChIP-seq	ChIPBase	None	0.5483
RAID04105313	LINC01193	lncRNA	348120	Homo sapiens	FUS	protein	2521	Homo sapiens	CLIP-seq	starBase	None	0.5483
RAID04105328	RNF216-IT1	lncRNA	100874342	Homo sapiens	FUS	protein	2521	Homo sapiens	CLIP-seq	starBase	None	0.5483
RAID04105333	CRNDE	lncRNA	643911	Homo sapiens	HEATR5B	protein	54497	Homo sapiens	Microarray//RNA-seq	LncRNA2Target	None	0.6606
RAID04105337	Gm4117	lncRNA	100042940	Mus musculus	Ptbp2	protein	56195	Mus musculus	CLIP-seq	starBase	None	0.5483
RAID04105388	C1orf186	lncRNA	440712	Homo sapiens	CEBPB	protein	1051	Homo sapiens	ChIP-seq	ChIPBase	None	0.5483
RAID04105402	THAP7-AS1	lncRNA	439931	Homo sapiens	U2AF2	protein	11338	Homo sapiens	CLIP-seq	starBase	None	0.5483
RAID04105408	FENDRR	lncRNA	400550	Homo sapiens	UROD	protein	7389	Homo sapiens	Microarray//RNA-seq	LncRNA2Target	None	0.6606
RAID04105429	CASP8AP2	lncRNA	9994	Homo sapiens	MOV10	protein	4343	Homo sapiens	CLIP-seq	starBase	None	0.5483
RAID04105452	LOC100132356	lncRNA	100132356	Homo sapiens	E2F4	protein	1874	Homo sapiens	ChIP-seq	ChIPBase	None	0.5483
RAID04105461	FOXO3B	lncRNA	2310	Homo sapiens	UPF1	protein	5976	Homo sapiens	CLIP-seq	starBase	None	0.5483
RAID04105465	Gm4755	lncRNA	208941	Mus musculus	Sirt1	protein	93759	Mus musculus	ChIP-seq	ChIPBase	None	0.5483
RAID04105520	MYEOV	lncRNA	26579	Homo sapiens	CDX2	protein	1045	Homo sapiens	ChIP-seq	ChIPBase	None	0.5483
RAID04105529	F730043M19Rik	lncRNA	320046	Mus musculus	Srsf1	protein	110809	Mus musculus	CLIP-seq	starBase	None	0.5483
RAID04105554	MALAT1	lncRNA	378938	Homo sapiens	OSGIN2	protein	734	Homo sapiens	Microarray//RNA-seq	LncRNA2Target	None	0.6606
RAID04105586	FLJ27354	lncRNA	400761	Homo sapiens	GATA6	protein	2627	Homo sapiens	ChIP-seq	ChIPBase	None	0.5483
RAID04105657	MALAT1	lncRNA	378938	Homo sapiens	DYRK3	protein	8444	Homo sapiens	Microarray//RNA-seq	LncRNA2Target	None	0.6606
RAID04105699	MALAT1	lncRNA	378938	Homo sapiens	OR1A2	protein	26189	Homo sapiens	Microarray//RNA-seq	LncRNA2Target	None	0.6606
RAID04105832	CRNDE	lncRNA	643911	Homo sapiens	ELMO2	protein	63916	Homo sapiens	Microarray//RNA-seq	LncRNA2Target	None	0.6606
RAID04105839	LINC00638	lncRNA	196872	Homo sapiens	FMR1	protein	2332	Homo sapiens	CLIP-seq	starBase	None	0.5483
RAID04105940	1700007M16Rik	lncRNA	72237	Mus musculus	Mycn	protein	18109	Mus musculus	ChIP-seq	ChIPBase	None	0.5483
RAID04105966	4931440J10Rik	lncRNA	71000	Mus musculus	Tbx5	protein	21388	Mus musculus	ChIP-seq	ChIPBase	None	0.5483
RAID04105969	MALAT1	lncRNA	378938	Homo sapiens	DYRK1A	protein	1859	Homo sapiens	Microarray//RNA-seq	LncRNA2Target	None	0.6606
RAID04106026	RPL23AP7	lncRNA	118433	Homo sapiens	NR3C1	protein	2908	Homo sapiens	ChIP-seq	ChIPBase	None	0.5483
RAID04106030	MALAT1	lncRNA	378938	Homo sapiens	SLC25A46	protein	91137	Homo sapiens	Microarray//RNA-seq	LncRNA2Target	None	0.6606
RAID04106033	Tmem14c	lncRNA	66154	Mus musculus	Rest	protein	19712	Mus musculus	RIP (RNA Immunoprecipitation)	NPInter	24063527	0.7311
RAID04106081	ANCR	lncRNA	282	Homo sapiens	SEC14L2	protein	23541	Homo sapiens	Microarray//RNA-seq	LncRNA2Target	None	0.6606
RAID04106090	BANCR	lncRNA	100885775	Homo sapiens	BLZF1	protein	8548	Homo sapiens	Microarray//RNA-seq	LncRNA2Target	None	0.6606
RAID04106095	A330032B11Rik	lncRNA	319931	Mus musculus	Ezh2	protein	14056	Mus musculus	ChIP-seq	ChIPBase	None	0.5483
RAID04106101	PDE3B	lncRNA	5140	Homo sapiens	E2F4	protein	1874	Homo sapiens	ChIP-seq	ChIPBase	None	0.5483
RAID04106136	ANCR	lncRNA	282	Homo sapiens	PLA2G4F	protein	255189	Homo sapiens	Microarray//RNA-seq	LncRNA2Target	None	0.6606
RAID04106143	Gm12415	lncRNA	105247161	Mus musculus	Spi1	protein	20375	Mus musculus	ChIP-seq	ChIPBase	None	0.5483
RAID04106156	FENDRR	lncRNA	400550	Homo sapiens	WDR92	protein	116143	Homo sapiens	Microarray//RNA-seq	LncRNA2Target	None	0.6606
RAID04106207	G730013B05Rik	lncRNA	619312	Mus musculus	Eya4	protein	14051	Mus musculus	Microarray//RNA-seq	LncRNA2Target	None	0.6606
RAID04106261	MALAT1	lncRNA	378938	Homo sapiens	TMEM204	protein	79652	Homo sapiens	Microarray//RNA-seq	LncRNA2Target	None	0.6606
RAID04106288	CRNDE	lncRNA	643911	Homo sapiens	SPATC1L	protein	84221	Homo sapiens	Microarray//RNA-seq	LncRNA2Target	None	0.6606
RAID04106296	ABCA17P	lncRNA	650655	Homo sapiens	ETS1	protein	2113	Homo sapiens	ChIP-seq	ChIPBase	None	0.5483
RAID04106300	FENDRR	lncRNA	400550	Homo sapiens	SLC12A8	protein	84561	Homo sapiens	Microarray//RNA-seq	LncRNA2Target	None	0.6606
RAID04106352	HCG27	lncRNA	253018	Homo sapiens	SMARCC2	protein	6601	Homo sapiens	ChIP-seq	ChIPBase	None	0.5483
RAID04106355	LINC00152	lncRNA	112597	Homo sapiens	CEBPB	protein	1051	Homo sapiens	ChIP-seq	ChIPBase	None	0.5483
RAID04106369	ANCR	lncRNA	282	Homo sapiens	KRT1	protein	3848	Homo sapiens	Microarray//RNA-seq	LncRNA2Target	None	0.6606
RAID04106430	MIAT	lncRNA	440823	Homo sapiens	ERG	protein	2078	Homo sapiens	ChIP-seq	ChIPBase	None	0.5483
RAID04106442	Gm9581	lncRNA	672884	Mus musculus	Srsf1	protein	110809	Mus musculus	CLIP-seq	starBase	None	0.5483
RAID04106497	MALAT1	lncRNA	378938	Homo sapiens	ZNF160	protein	90338	Homo sapiens	Microarray//RNA-seq	LncRNA2Target	None	0.6606
RAID04106515	LOC440117	lncRNA	440117	Homo sapiens	CDX2	protein	1045	Homo sapiens	ChIP-seq	ChIPBase	None	0.5483
RAID04106523	MIR17HG	lncRNA	407975	Homo sapiens	E2F6	protein	1876	Homo sapiens	ChIP-seq	ChIPBase	None	0.5483
RAID04106567	Gm9917	lncRNA	100038755	Mus musculus	Ep300	protein	328572	Mus musculus	ChIP-seq	ChIPBase	None	0.5483
RAID04106571	HCG16	lncRNA	414766	Homo sapiens	NFE2	protein	4778	Homo sapiens	ChIP-seq	ChIPBase	None	0.5483
RAID04106651	Gm5544	lncRNA	433632	Mus musculus	Spi1	protein	20375	Mus musculus	ChIP-seq	ChIPBase	None	0.5483
RAID04106679	MALAT1	lncRNA	378938	Homo sapiens	PPM1M	protein	132160	Homo sapiens	Microarray//RNA-seq	LncRNA2Target	None	0.6606
RAID04106745	SFTA1P	lncRNA	207107	Homo sapiens	PPARG	protein	5468	Homo sapiens	ChIP-seq	ChIPBase	None	0.5483
RAID04106835	XIST	lncRNA	7503	Homo sapiens	NXF1	protein	10482	Homo sapiens	Western Blot//IP (immunoprecipitation)//RT-PCR	NPInter//LncRNADisease//RAID	17333237	0.9526
RAID04106837	C1orf186	lncRNA	440712	Homo sapiens	SP1	protein	6667	Homo sapiens	ChIP-seq	ChIPBase	None	0.5483
RAID04106847	CD27-AS1	lncRNA	678655	Homo sapiens	U2AF2	protein	11338	Homo sapiens	CLIP-seq	starBase	None	0.5483
RAID04106863	DNAJC3-AS1	lncRNA	100289274	Homo sapiens	E2F4	protein	1874	Homo sapiens	ChIP-seq	ChIPBase	None	0.5483
RAID04106871	MALAT1	lncRNA	378938	Homo sapiens	DNAJB5	protein	25822	Homo sapiens	Microarray//RNA-seq	LncRNA2Target	None	0.6606
RAID04106910	ANO10	lncRNA	55129	Homo sapiens	CEBPB	protein	1051	Homo sapiens	ChIP-seq	ChIPBase	None	0.5483
RAID04106940	CRNDE	lncRNA	643911	Homo sapiens	CEMIP	protein	57214	Homo sapiens	Microarray//RNA-seq	LncRNA2Target	None	0.6606
RAID04106979	MINOS1P1	lncRNA	100462953	Homo sapiens	SPI1	protein	6688	Homo sapiens	ChIP-seq	ChIPBase	None	0.5483
RAID04107024	Gm15348	lncRNA	100038554	Mus musculus	Wdr5	protein	140858	Mus musculus	ChIP-seq	ChIPBase	None	0.5483
RAID04107064	ANCR	lncRNA	282	Homo sapiens	FAXC	protein	84553	Homo sapiens	Microarray//RNA-seq	LncRNA2Target	None	0.6606
RAID04107082	FENDRR	lncRNA	400550	Homo sapiens	YIPF4	protein	84272	Homo sapiens	Microarray//RNA-seq	LncRNA2Target	None	0.6606
RAID04107084	FAM201A	lncRNA	158228	Homo sapiens	EIF4A3	protein	9775	Homo sapiens	CLIP-seq	starBase	None	0.5483
RAID04107086	DNAJC3-AS1	lncRNA	100289274	Homo sapiens	FOS	protein	2353	Homo sapiens	ChIP-seq	ChIPBase	None	0.5483
RAID04107263	Gm12052	lncRNA	100042827	Mus musculus	Ctcf	protein	13018	Mus musculus	ChIP-seq	ChIPBase	None	0.5483
RAID04107269	ZNF718	lncRNA	255403	Homo sapiens	IGF2BP3	protein	10643	Homo sapiens	CLIP-seq	starBase	None	0.5483
RAID04107291	FENDRR	lncRNA	400550	Homo sapiens	LYSMD1	protein	388695	Homo sapiens	Microarray//RNA-seq	LncRNA2Target	None	0.6606
RAID04107308	Gm11538	lncRNA	432593	Mus musculus	Wdr5	protein	140858	Mus musculus	ChIP-seq	ChIPBase	None	0.5483
RAID04107334	MALAT1	lncRNA	378938	Homo sapiens	AOC2	protein	314	Homo sapiens	Microarray//RNA-seq	LncRNA2Target	None	0.6606
RAID04107346	SNHG11	lncRNA	128439	Homo sapiens	ELF1	protein	1997	Homo sapiens	ChIP-seq	ChIPBase	None	0.5483
RAID04107358	PINK1-AS	lncRNA	100861548	Homo sapiens	DGCR8	protein	54487	Homo sapiens	CLIP-seq	starBase	None	0.5483
RAID04107370	FENDRR	lncRNA	400550	Homo sapiens	ZNF235	protein	9310	Homo sapiens	Microarray//RNA-seq	LncRNA2Target	None	0.6606
RAID04107382	MALAT1	lncRNA	378938	Homo sapiens	DCLK2	protein	166614	Homo sapiens	Microarray//RNA-seq	LncRNA2Target	None	0.6606
RAID04107404	LINC00472	lncRNA	79940	Homo sapiens	SMARCB1	protein	6598	Homo sapiens	ChIP-seq	ChIPBase	None	0.5483
RAID04107446	A2ML1-AS2	lncRNA	106478979	Homo sapiens	FOXA1	protein	3169	Homo sapiens	ChIP-seq	ChIPBase	None	0.5483
RAID04107471	CRNDE	lncRNA	643911	Homo sapiens	GHDC	protein	84514	Homo sapiens	Microarray//RNA-seq	LncRNA2Target	None	0.6606
RAID04107504	LOC115110	lncRNA	115110	Homo sapiens	RAD21	protein	5885	Homo sapiens	ChIP-seq	ChIPBase	None	0.5483
RAID04107505	ZNF37BP	lncRNA	100129482	Homo sapiens	TCF7L2	protein	6934	Homo sapiens	ChIP-seq	ChIPBase	None	0.5483
RAID04107509	LOC727710	lncRNA	727710	Homo sapiens	NFYA	protein	4800	Homo sapiens	ChIP-seq	ChIPBase	None	0.5483
RAID04107521	MALAT1	lncRNA	378938	Homo sapiens	FAR1	protein	84188	Homo sapiens	Microarray//RNA-seq	LncRNA2Target	None	0.6606
RAID04107590	Platr29	lncRNA	102631976	Mus musculus	Tbx5	protein	21388	Mus musculus	ChIP-seq	ChIPBase	None	0.5483
RAID04107606	TUG1	lncRNA	55000	Homo sapiens	IRS1	protein	3667	Homo sapiens	Microarray//RNA-seq	LncRNA2Target	None	0.6606
RAID04107673	FENDRR	lncRNA	400550	Homo sapiens	RPE	protein	6120	Homo sapiens	Microarray//RNA-seq	LncRNA2Target	None	0.6606
RAID04107694	Gm16740	lncRNA	100504029	Mus musculus	Tcf3	protein	21423	Mus musculus	ChIP-seq	ChIPBase	None	0.5483
RAID04107788	WWTR1-AS1	lncRNA	100128025	Homo sapiens	HEY1	protein	23462	Homo sapiens	ChIP-seq	ChIPBase	None	0.5483
RAID04107791	ANP32A	lncRNA	8125	Homo sapiens	TCF12	protein	6938	Homo sapiens	ChIP-seq	ChIPBase	None	0.5483
RAID04107810	LINC00200	lncRNA	399706	Homo sapiens	MAX	protein	4149	Homo sapiens	ChIP-seq	ChIPBase	None	0.5483
RAID04107815	FAM212B	lncRNA	55924	Homo sapiens	SMARCB1	protein	6598	Homo sapiens	ChIP-seq	ChIPBase	None	0.5483
RAID04107847	TUG1	lncRNA	55000	Homo sapiens	SLFN12	protein	55106	Homo sapiens	Microarray//RNA-seq	LncRNA2Target	None	0.6606
RAID04107856	TUG1	lncRNA	55000	Homo sapiens	EHD3	protein	30845	Homo sapiens	Microarray//RNA-seq	LncRNA2Target	None	0.6606
RAID04107860	TUG1	lncRNA	55000	Homo sapiens	ENTPD7	protein	57089	Homo sapiens	Microarray//RNA-seq	LncRNA2Target	None	0.6606
RAID04107866	ATP6V0E2-AS1	lncRNA	401431	Homo sapiens	FUS	protein	2521	Homo sapiens	CLIP-seq	starBase	None	0.5483
RAID04107877	HCG9	lncRNA	10255	Homo sapiens	PPARG	protein	5468	Homo sapiens	ChIP-seq	ChIPBase	None	0.5483
RAID04107966	LINC00094	lncRNA	266655	Homo sapiens	SPI1	protein	6688	Homo sapiens	ChIP-seq	ChIPBase	None	0.5483
RAID04107978	A930024N18Rik	lncRNA	328748	Mus musculus	Mtf2	protein	17765	Mus musculus	ChIP-seq	ChIPBase	None	0.5483
RAID04107981	Platr29	lncRNA	102631976	Mus musculus	E2f1	protein	13555	Mus musculus	ChIP-seq	ChIPBase	None	0.5483
RAID04108017	Miat	lncRNA	330166	Mus musculus	T	protein	20997	Mus musculus	Western Blot//RT-PCR	LncRNA2Target	20026622	0.8808
RAID04108047	RNY5	lncRNA	6090	Homo sapiens	SMARCC2	protein	6601	Homo sapiens	ChIP-seq	ChIPBase	None	0.5483
RAID04108072	CRNDE	lncRNA	643911	Homo sapiens	ZBTB47	protein	92999	Homo sapiens	Microarray//RNA-seq	LncRNA2Target	None	0.6606
RAID04108076	FENDRR	lncRNA	400550	Homo sapiens	ZFY	protein	7544	Homo sapiens	Microarray//RNA-seq	LncRNA2Target	None	0.6606
RAID04108100	C030047K22Rik	lncRNA	77618	Mus musculus	Sin3b	protein	20467	Mus musculus	ChIP-seq	ChIPBase	None	0.5483
RAID04108202	LOC401177	lncRNA	401177	Homo sapiens	BDP1	protein	55814	Homo sapiens	ChIP-seq	ChIPBase	None	0.5483
RAID04108203	LOC100505715	lncRNA	100505715	Homo sapiens	SPDEF	protein	25803	Homo sapiens	ChIP-seq	ChIPBase	None	0.5483
RAID04108332	A230009B12Rik	lncRNA	319750	Mus musculus	Fus	protein	233908	Mus musculus	CLIP-seq	starBase	None	0.5483
RAID04108343	HIVEP3	lncRNA	59269	Homo sapiens	PBX3	protein	5090	Homo sapiens	ChIP-seq	ChIPBase	None	0.5483
RAID04108353	PCBP1-AS1	lncRNA	400960	Homo sapiens	HNRNPC	protein	3183	Homo sapiens	CLIP-seq	starBase	None	0.5483
RAID04108367	MALAT1	lncRNA	378938	Homo sapiens	FAM173B	protein	134145	Homo sapiens	Microarray//RNA-seq	LncRNA2Target	None	0.6606
RAID04108470	ANP32A	lncRNA	8125	Homo sapiens	ERG	protein	2078	Homo sapiens	ChIP-seq	ChIPBase	None	0.5483
RAID04108487	ZFAS1	lncRNA	441951	Homo sapiens	MED12	protein	9968	Homo sapiens	ChIP-seq	ChIPBase	None	0.5483
RAID04108524	PRKAR2A-AS1	lncRNA	100506637	Homo sapiens	U2AF2	protein	11338	Homo sapiens	CLIP-seq	starBase	None	0.5483
RAID04108554	JPX	lncRNA	554203	Homo sapiens	LIN28A	protein	79727	Homo sapiens	CLIP-seq	starBase	None	0.5483
RAID04108576	1700007L15Rik	lncRNA	100502742	Mus musculus	Sirt1	protein	93759	Mus musculus	ChIP-seq	ChIPBase	None	0.5483
RAID04108582	Gm17586	lncRNA	100504040	Mus musculus	Rbbp5	protein	213464	Mus musculus	ChIP-seq	ChIPBase	None	0.5483
RAID04108604	HCG27	lncRNA	253018	Homo sapiens	FOXH1	protein	8928	Homo sapiens	ChIP-seq	ChIPBase	None	0.5483
RAID04108619	ZFAS1	lncRNA	441951	Homo sapiens	E2F4	protein	1874	Homo sapiens	ChIP-seq	ChIPBase	None	0.5483
RAID04108757	TUG1	lncRNA	55000	Homo sapiens	BVES	protein	11149	Homo sapiens	Microarray//RNA-seq	LncRNA2Target	None	0.6606
RAID04108771	SND1-IT1	lncRNA	27099	Homo sapiens	SREBF1	protein	6720	Homo sapiens	ChIP-seq	ChIPBase	None	0.5483
RAID04108779	LOC100506274	lncRNA	100506274	Homo sapiens	AR	protein	367	Homo sapiens	ChIP-seq	ChIPBase	None	0.5483
RAID04108831	USP6NL	lncRNA	9712	Homo sapiens	ZC3H7B	protein	23264	Homo sapiens	CLIP-seq	starBase	None	0.5483
RAID04108850	4930448E22Rik	lncRNA	74681	Mus musculus	Sox2	protein	20674	Mus musculus	ChIP-seq	ChIPBase	None	0.5483
RAID04108855	TUG1	lncRNA	55000	Homo sapiens	UBE2C	protein	11065	Homo sapiens	Microarray//RNA-seq	LncRNA2Target	None	0.6606
RAID04108856	CRNDE	lncRNA	643911	Homo sapiens	ARRDC3	protein	57561	Homo sapiens	Microarray//RNA-seq	LncRNA2Target	None	0.6606
RAID04108857	FENDRR	lncRNA	400550	Homo sapiens	KPNA1	protein	3836	Homo sapiens	Microarray//RNA-seq	LncRNA2Target	None	0.6606
RAID04108863	MYC	lncRNA	4609	Homo sapiens	SPI1	protein	6688	Homo sapiens	ChIP-seq	ChIPBase	None	0.5483
RAID04108893	FENDRR	lncRNA	400550	Homo sapiens	ANP32E	protein	81611	Homo sapiens	Microarray//RNA-seq	LncRNA2Target	None	0.6606
RAID04108895	5730422E09Rik	lncRNA	433966	Mus musculus	E2f1	protein	13555	Mus musculus	ChIP-seq	ChIPBase	None	0.5483
RAID04108897	LOC440028	lncRNA	440028	Homo sapiens	IRF4	protein	3662	Homo sapiens	ChIP-seq	ChIPBase	None	0.5483
RAID04108905	PTENP1	lncRNA	11191	Homo sapiens	IGF2BP3	protein	10643	Homo sapiens	CLIP-seq	starBase	None	0.5483
RAID04108932	LINC00843	lncRNA	102902672	Homo sapiens	UPF1	protein	5976	Homo sapiens	CLIP-seq	starBase	None	0.5483
RAID04108954	TUG1	lncRNA	55000	Homo sapiens	IRAK1	protein	3654	Homo sapiens	Microarray//RNA-seq	LncRNA2Target	None	0.6606
RAID04109002	CLUHP3	lncRNA	100132341	Homo sapiens	PTBP1	protein	5725	Homo sapiens	CLIP-seq	starBase	None	0.5483
RAID04109009	A330023F24Rik	lncRNA	320977	Mus musculus	E2f4	protein	104394	Mus musculus	ChIP-seq	ChIPBase	None	0.5483
RAID04109078	MACROD2-IT1	lncRNA	140848	Homo sapiens	ERG	protein	2078	Homo sapiens	ChIP-seq	ChIPBase	None	0.5483
RAID04109214	FENDRR	lncRNA	400550	Homo sapiens	ETFB	protein	2109	Homo sapiens	Microarray//RNA-seq	LncRNA2Target	None	0.6606
RAID04109234	TM4SF1-AS1	lncRNA	100874091	Homo sapiens	EIF4A3	protein	9775	Homo sapiens	CLIP-seq	starBase	None	0.5483
RAID04109257	Fam120aos	lncRNA	68128	Mus musculus	E2f1	protein	13555	Mus musculus	ChIP-seq	ChIPBase	None	0.5483
RAID04109284	GS1-594A7.3	lncRNA	104798195	Homo sapiens	BRF2	protein	55290	Homo sapiens	ChIP-seq	ChIPBase	None	0.5483
RAID04109323	FENDRR	lncRNA	400550	Homo sapiens	PRDM2	protein	7799	Homo sapiens	Microarray//RNA-seq	LncRNA2Target	None	0.6606
RAID04109331	CRNDE	lncRNA	643911	Homo sapiens	ZNF175	protein	7728	Homo sapiens	Microarray//RNA-seq	LncRNA2Target	None	0.6606
RAID04109349	GRB10	lncRNA	2887	Homo sapiens	CTCF	protein	10664	Homo sapiens	ChIP-seq	ChIPBase	None	0.5483
RAID04109352	LOC400548	lncRNA	400548	Homo sapiens	NANOG	protein	79923	Homo sapiens	ChIP-seq	ChIPBase	None	0.5483
RAID04109406	MALAT1	lncRNA	378938	Homo sapiens	MMP10	protein	4319	Homo sapiens	Microarray//RNA-seq	LncRNA2Target	None	0.6606
RAID04109424	FENDRR	lncRNA	400550	Homo sapiens	PPP3R1	protein	5534	Homo sapiens	Microarray//RNA-seq	LncRNA2Target	None	0.6606
RAID04109437	FAM138B	lncRNA	654412	Homo sapiens	AR	protein	367	Homo sapiens	ChIP-seq	ChIPBase	None	0.5483
RAID04109447	MALAT1	lncRNA	378938	Homo sapiens	POLH	protein	5429	Homo sapiens	Microarray//RNA-seq	LncRNA2Target	None	0.6606
RAID04109464	MALAT1	lncRNA	378938	Homo sapiens	UQCC1	protein	55245	Homo sapiens	Microarray//RNA-seq	LncRNA2Target	None	0.6606
RAID04109480	SEC22B	lncRNA	9554	Homo sapiens	IGF2BP2	protein	10644	Homo sapiens	CLIP-seq	starBase	None	0.5483
RAID04109511	LINC00466	lncRNA	199899	Homo sapiens	ZNF263	protein	10127	Homo sapiens	ChIP-seq	ChIPBase	None	0.5483
RAID04109519	PRIM2	lncRNA	5558	Homo sapiens	HNRNPC	protein	3183	Homo sapiens	CLIP-seq	starBase	None	0.5483
RAID04109520	LL22NC03-104C7.1	lncRNA	105373004	Homo sapiens	SMARCC1	protein	6599	Homo sapiens	ChIP-seq	ChIPBase	None	0.5483
RAID04109539	TPT1-AS1	lncRNA	100190939	Homo sapiens	SRSF1	protein	6426	Homo sapiens	CLIP-seq	starBase	None	0.5483
RAID04109567	9630001P10Rik	lncRNA	319251	Mus musculus	Tbx5	protein	21388	Mus musculus	ChIP-seq	ChIPBase	None	0.5483
RAID04109623	RPL30	lncRNA	6156	Homo sapiens	STAT1	protein	6772	Homo sapiens	ChIP-seq	ChIPBase	None	0.5483
RAID04109644	FENDRR	lncRNA	400550	Homo sapiens	ACTRT3	protein	84517	Homo sapiens	Microarray//RNA-seq	LncRNA2Target	None	0.6606
RAID04109719	SRSF10	lncRNA	10772	Homo sapiens	JUN	protein	3725	Homo sapiens	ChIP-seq	ChIPBase	None	0.5483
RAID04109726	LINC00475	lncRNA	158314	Homo sapiens	ERG	protein	2078	Homo sapiens	ChIP-seq	ChIPBase	None	0.5483
RAID04109776	MALAT1	lncRNA	378938	Homo sapiens	ZCCHC14	protein	23174	Homo sapiens	Microarray//RNA-seq	LncRNA2Target	None	0.6606
RAID04109784	BANCR	lncRNA	100885775	Homo sapiens	NLRP2	protein	55655	Homo sapiens	Microarray//RNA-seq	LncRNA2Target	None	0.6606
RAID04109809	TUG1	lncRNA	55000	Homo sapiens	CDYL	protein	9425	Homo sapiens	Microarray//RNA-seq	LncRNA2Target	None	0.6606
RAID04109815	HCG11	lncRNA	493812	Homo sapiens	CTCF	protein	10664	Homo sapiens	ChIP-seq	ChIPBase	None	0.5483
RAID04109831	MYEOV	lncRNA	26579	Homo sapiens	STAT2	protein	6773	Homo sapiens	ChIP-seq	ChIPBase	None	0.5483
RAID04109848	USP12-AS2	lncRNA	100874071	Homo sapiens	SMARCC1	protein	6599	Homo sapiens	ChIP-seq	ChIPBase	None	0.5483
RAID04109851	ACAP2-IT1	lncRNA	100874306	Homo sapiens	EBF1	protein	1879	Homo sapiens	ChIP-seq	ChIPBase	None	0.5483
RAID04109856	TSSC2	lncRNA	650368	Homo sapiens	GATA6	protein	2627	Homo sapiens	ChIP-seq	ChIPBase	None	0.5483
RAID04109962	ASMTL-AS1	lncRNA	80161	Homo sapiens	FUS	protein	2521	Homo sapiens	CLIP-seq	starBase	None	0.5483
RAID04109966	LINC00689	lncRNA	154822	Homo sapiens	HNRNPC	protein	3183	Homo sapiens	CLIP-seq	starBase	None	0.5483
RAID04109983	HSD52	lncRNA	729467	Homo sapiens	PBX3	protein	5090	Homo sapiens	ChIP-seq	ChIPBase	None	0.5483
RAID04110014	Mirt1	lncRNA	381232	Mus musculus	Lmo2	protein	16909	Mus musculus	ChIP-seq	ChIPBase	None	0.5483
RAID04110025	TUG1	lncRNA	55000	Homo sapiens	C1orf43	protein	25912	Homo sapiens	Microarray//RNA-seq	LncRNA2Target	None	0.6606
RAID04110027	LOC115110	lncRNA	115110	Homo sapiens	YY1	protein	7528	Homo sapiens	ChIP-seq	ChIPBase	None	0.5483
RAID04110081	DLEU2	lncRNA	8847	Homo sapiens	YY1	protein	7528	Homo sapiens	ChIP-seq	ChIPBase	None	0.5483
RAID04110099	LOC100506585	lncRNA	100506585	Homo sapiens	ERG	protein	2078	Homo sapiens	ChIP-seq	ChIPBase	None	0.5483
RAID04110110	FENDRR	lncRNA	400550	Homo sapiens	ARPC5	protein	10092	Homo sapiens	Microarray//RNA-seq	LncRNA2Target	None	0.6606
RAID04110123	CRNDE	lncRNA	643911	Homo sapiens	GAS2L3	protein	283431	Homo sapiens	Microarray//RNA-seq	LncRNA2Target	None	0.6606
RAID04110130	CRNDE	lncRNA	643911	Homo sapiens	DCAF16	protein	54876	Homo sapiens	Microarray//RNA-seq	LncRNA2Target	None	0.6606
RAID04110230	EIF2D	lncRNA	1939	Homo sapiens	ETS1	protein	2113	Homo sapiens	ChIP-seq	ChIPBase	None	0.5483
RAID04110317	PDXDC2P	lncRNA	283970	Homo sapiens	DGCR8	protein	54487	Homo sapiens	CLIP-seq	starBase	None	0.5483
RAID04110363	TPD52	lncRNA	7163	Homo sapiens	NFYB	protein	4801	Homo sapiens	ChIP-seq	ChIPBase	None	0.5483
RAID04110385	FENDRR	lncRNA	400550	Homo sapiens	MTUS1	protein	57509	Homo sapiens	Microarray//RNA-seq	LncRNA2Target	None	0.6606
RAID04110411	ANCR	lncRNA	282	Homo sapiens	ARHGEF28	protein	64283	Homo sapiens	Microarray//RNA-seq	LncRNA2Target	None	0.6606
RAID04110447	GRK4	lncRNA	2868	Homo sapiens	AR	protein	367	Homo sapiens	ChIP-seq	ChIPBase	None	0.5483
RAID04110503	FENDRR	lncRNA	400550	Homo sapiens	ILVBL	protein	10994	Homo sapiens	Microarray//RNA-seq	LncRNA2Target	None	0.6606
RAID04110522	PIP5K1B	lncRNA	8395	Homo sapiens	ERG	protein	2078	Homo sapiens	ChIP-seq	ChIPBase	None	0.5483
RAID04110542	CRNDE	lncRNA	643911	Homo sapiens	SLC16A3	protein	9123	Homo sapiens	Microarray//RNA-seq	LncRNA2Target	None	0.6606
RAID04110609	CCNJL	lncRNA	79616	Homo sapiens	CDX2	protein	1045	Homo sapiens	ChIP-seq	ChIPBase	None	0.5483
RAID04110783	G730013B05Rik	lncRNA	619312	Mus musculus	Kidins220	protein	77480	Mus musculus	Microarray//RNA-seq	LncRNA2Target	None	0.6606
RAID04110889	OAF	lncRNA	220323	Homo sapiens	ERG	protein	2078	Homo sapiens	ChIP-seq	ChIPBase	None	0.5483
RAID04110896	SNHG1	lncRNA	23642	Homo sapiens	AR	protein	367	Homo sapiens	ChIP-seq	ChIPBase	None	0.5483
RAID04110906	SNHG7	lncRNA	84973	Homo sapiens	LIN28B	protein	389421	Homo sapiens	CLIP-seq	starBase	None	0.5483
RAID04110922	BANCR	lncRNA	100885775	Homo sapiens	CABLES1	protein	91768	Homo sapiens	Microarray//RNA-seq	LncRNA2Target	None	0.6606
RAID04110924	Xist	lncRNA	213742	Mus musculus	Wtap	protein	60532	Mus musculus	ChiRP-Seq (Chromatin Isolation by RNA purification)	NPInter	25843628	0.5483
RAID04110950	ANCR	lncRNA	282	Homo sapiens	TCTA	protein	6988	Homo sapiens	Microarray//RNA-seq	LncRNA2Target	None	0.6606
RAID04110966	LOC644838	lncRNA	644838	Homo sapiens	HNF4A	protein	3172	Homo sapiens	ChIP-seq	ChIPBase	None	0.5483
RAID04110990	MT1JP	lncRNA	4498	Homo sapiens	FUS	protein	2521	Homo sapiens	CLIP-seq	starBase	None	0.5483
RAID04111019	MALAT1	lncRNA	378938	Homo sapiens	ARFGEF1	protein	10565	Homo sapiens	Microarray//RNA-seq	LncRNA2Target	None	0.6606
RAID04111063	MALAT1	lncRNA	378938	Homo sapiens	CHN1	protein	1123	Homo sapiens	Microarray//RNA-seq	LncRNA2Target	None	0.6606
RAID04111085	SEC22B	lncRNA	9554	Homo sapiens	LIN28A	protein	79727	Homo sapiens	CLIP-seq	starBase	None	0.5483
RAID04111237	LOC100132781	lncRNA	100132781	Homo sapiens	AR	protein	367	Homo sapiens	ChIP-seq	ChIPBase	None	0.5483
RAID04111242	Gm11378	lncRNA	100041312	Mus musculus	Cebpb	protein	12608	Mus musculus	ChIP-seq	ChIPBase	None	0.5483
RAID04111253	4933439K11Rik	lncRNA	71319	Mus musculus	Tbx5	protein	21388	Mus musculus	ChIP-seq	ChIPBase	None	0.5483
RAID04111367	PVRL3-AS1	lncRNA	100506555	Homo sapiens	E2F4	protein	1874	Homo sapiens	ChIP-seq	ChIPBase	None	0.5483
RAID04111370	Gm2990	lncRNA	100040834	Mus musculus	Mtf2	protein	17765	Mus musculus	ChIP-seq	ChIPBase	None	0.5483
RAID04111489	LRRTM3	lncRNA	347731	Homo sapiens	HNF4A	protein	3172	Homo sapiens	ChIP-seq	ChIPBase	None	0.5483
RAID04111513	MALAT1	lncRNA	378938	Homo sapiens	SLC39A13	protein	91252	Homo sapiens	Microarray//RNA-seq	LncRNA2Target	None	0.6606
RAID04111530	ANCR	lncRNA	282	Homo sapiens	EVPL	protein	2125	Homo sapiens	Microarray//RNA-seq	LncRNA2Target	None	0.6606
RAID04111629	FLJ27354	lncRNA	400761	Homo sapiens	SMARCA4	protein	6597	Homo sapiens	ChIP-seq	ChIPBase	None	0.5483
RAID04111690	FENDRR	lncRNA	400550	Homo sapiens	CNOT2	protein	4848	Homo sapiens	Microarray//RNA-seq	LncRNA2Target	None	0.6606
RAID04111708	TUG1	lncRNA	55000	Homo sapiens	NAV2	protein	89797	Homo sapiens	Microarray//RNA-seq	LncRNA2Target	None	0.6606
RAID04111733	MALAT1	lncRNA	378938	Homo sapiens	BORCS6	protein	54785	Homo sapiens	Microarray//RNA-seq	LncRNA2Target	None	0.6606
RAID04111747	1810014B01Rik	lncRNA	66263	Mus musculus	Spi1	protein	20375	Mus musculus	ChIP-seq	ChIPBase	None	0.5483
RAID04111774	LOC643770	lncRNA	643770	Homo sapiens	SREBF2	protein	6721	Homo sapiens	ChIP-seq	ChIPBase	None	0.5483
RAID04111878	MIR941-2	lncRNA	100126339	Homo sapiens	CDX2	protein	1045	Homo sapiens	ChIP-seq	ChIPBase	None	0.5483
RAID04111936	FENDRR	lncRNA	400550	Homo sapiens	TMEM47	protein	83604	Homo sapiens	Microarray//RNA-seq	LncRNA2Target	None	0.6606
RAID04112007	Gm17276	lncRNA	100504381	Mus musculus	Gata1	protein	14460	Mus musculus	ChIP-seq	ChIPBase	None	0.5483
RAID04112086	LINC00472	lncRNA	79940	Homo sapiens	E2F1	protein	1869	Homo sapiens	ChIP-seq	ChIPBase	None	0.5483
RAID04112192	Ptgs2os	lncRNA	320019	Mus musculus	Suz12	protein	52615	Mus musculus	ChIP-seq	ChIPBase	None	0.5483
RAID04112197	MALAT1	lncRNA	378938	Homo sapiens	SYPL1	protein	6856	Homo sapiens	Microarray//RNA-seq	LncRNA2Target	None	0.6606
RAID04112206	1700007L15Rik	lncRNA	100502742	Mus musculus	D630023F18Rik	protein	98303	Mus musculus	Microarray//RNA-seq	LncRNA2Target	None	0.6606
RAID04112213	FOXN3-AS2	lncRNA	29018	Homo sapiens	NANOG	protein	79923	Homo sapiens	ChIP-seq	ChIPBase	None	0.5483
RAID04112234	FENDRR	lncRNA	400550	Homo sapiens	PATZ1	protein	23598	Homo sapiens	Microarray//RNA-seq	LncRNA2Target	None	0.6606
RAID04112247	ANCR	lncRNA	282	Homo sapiens	PLBD1	protein	79887	Homo sapiens	Microarray//RNA-seq	LncRNA2Target	None	0.6606
RAID04112289	2700069I18Rik	lncRNA	72608	Mus musculus	Cebpa	protein	12606	Mus musculus	ChIP-seq	ChIPBase	None	0.5483
RAID04112304	ABCA1	lncRNA	19	Homo sapiens	RXRA	protein	6256	Homo sapiens	ChIP-seq	ChIPBase	None	0.5483
RAID04112314	FENDRR	lncRNA	400550	Homo sapiens	OTUD6B	protein	51633	Homo sapiens	Microarray//RNA-seq	LncRNA2Target	None	0.6606
RAID04112337	MALAT1	lncRNA	378938	Homo sapiens	STAT2	protein	6773	Homo sapiens	Microarray//ChIP-seq//RNA-seq	ChIPBase//LncRNA2Target	None	0.7144
RAID04112352	XIST	lncRNA	7503	Homo sapiens	HNF4A	protein	3172	Homo sapiens	ChIP-seq	ChIPBase	None	0.5483
RAID04112411	PRKAA1	lncRNA	5562	Homo sapiens	GATA2	protein	2624	Homo sapiens	ChIP-seq	ChIPBase	None	0.5483
RAID04112446	EWSAT1	lncRNA	283673	Homo sapiens	POU5F1	protein	5460	Homo sapiens	ChIP-seq	ChIPBase	None	0.5483
RAID04112471	Gm11527	lncRNA	100040014	Mus musculus	Cebpa	protein	12606	Mus musculus	ChIP-seq	ChIPBase	None	0.5483
RAID04112518	TUG1	lncRNA	55000	Homo sapiens	ELK1	protein	2002	Homo sapiens	Microarray//RNA-seq	LncRNA2Target	None	0.6606
RAID04112590	FENDRR	lncRNA	400550	Homo sapiens	OAS2	protein	4939	Homo sapiens	Microarray//RNA-seq	LncRNA2Target	None	0.6606
RAID04112612	TUG1	lncRNA	55000	Homo sapiens	CIAO1	protein	9391	Homo sapiens	Microarray//RNA-seq	LncRNA2Target	None	0.6606
RAID04112660	FENDRR	lncRNA	400550	Homo sapiens	PTGS1	protein	5742	Homo sapiens	Microarray//RNA-seq	LncRNA2Target	None	0.6606
RAID04112757	HOTTIP	lncRNA	100316868	Homo sapiens	SMARCB1	protein	6598	Homo sapiens	ChIP-seq	ChIPBase	None	0.5483
RAID04112775	DMGDH	lncRNA	29958	Homo sapiens	POLR3A	protein	11128	Homo sapiens	ChIP-seq	ChIPBase	None	0.5483
RAID04112787	2010015M23Rik	lncRNA	72087	Mus musculus	Sin3b	protein	20467	Mus musculus	ChIP-seq	ChIPBase	None	0.5483
RAID04112812	CRNDE	lncRNA	643911	Homo sapiens	TCTN2	protein	79867	Homo sapiens	Microarray//RNA-seq	LncRNA2Target	None	0.6606
RAID04112829	1700039M10Rik	lncRNA	67518	Mus musculus	Spi1	protein	20375	Mus musculus	ChIP-seq	ChIPBase	None	0.5483
RAID04112898	G730013B05Rik	lncRNA	619312	Mus musculus	Tnfrsf11b	protein	18383	Mus musculus	Microarray//RNA-seq	LncRNA2Target	None	0.6606
RAID04112910	LOC389033	lncRNA	389033	Homo sapiens	CDX2	protein	1045	Homo sapiens	ChIP-seq	ChIPBase	None	0.5483
RAID04112921	Platr4	lncRNA	78706	Mus musculus	Spi1	protein	20375	Mus musculus	ChIP-seq	ChIPBase	None	0.5483
RAID04113028	SNHG16	lncRNA	100507246	Homo sapiens	FXR2	protein	9513	Homo sapiens	CLIP-seq	starBase	None	0.5483
RAID04113039	FAM99B	lncRNA	100132464	Homo sapiens	MYC	protein	4609	Homo sapiens	ChIP-seq	ChIPBase	None	0.5483
RAID04113045	Gm15762	lncRNA	100039736	Mus musculus	Pparg	protein	19016	Mus musculus	ChIP-seq	ChIPBase	None	0.5483
RAID04113055	HOTAIRM1	lncRNA	100506311	Homo sapiens	FOS	protein	2353	Homo sapiens	ChIP-seq	ChIPBase	None	0.5483
RAID04113066	FUBP1	lncRNA	8880	Homo sapiens	CTCF	protein	10664	Homo sapiens	ChIP-seq	ChIPBase	None	0.5483
RAID04113115	Gm4349	lncRNA	100043305	Mus musculus	Gata1	protein	14460	Mus musculus	ChIP-seq	ChIPBase	None	0.5483
RAID04113144	FAM138D	lncRNA	677784	Homo sapiens	GTF2B	protein	2959	Homo sapiens	ChIP-seq	ChIPBase	None	0.5483
RAID04113155	MALAT1	lncRNA	378938	Homo sapiens	BTG1	protein	694	Homo sapiens	Microarray//RNA-seq	LncRNA2Target	None	0.6606
RAID04113156	FENDRR	lncRNA	400550	Homo sapiens	TMEM156	protein	80008	Homo sapiens	Microarray//RNA-seq	LncRNA2Target	None	0.6606
RAID04113192	4930405D11Rik	lncRNA	73922	Mus musculus	Erg	protein	13876	Mus musculus	ChIP-seq	ChIPBase	None	0.5483
RAID04113316	LINC01617	lncRNA	101926947	Homo sapiens	SP1	protein	6667	Homo sapiens	ChIP-seq	ChIPBase	None	0.5483
RAID04113318	Gm15246	lncRNA	100040950	Mus musculus	Srsf2	protein	20382	Mus musculus	CLIP-seq	starBase	None	0.5483
RAID04113326	4632428C04Rik	lncRNA	100043102	Mus musculus	Gfi1b	protein	14582	Mus musculus	ChIP-seq	ChIPBase	None	0.5483
RAID04113335	ZNRD1-AS1	lncRNA	80862	Homo sapiens	HNRNPC	protein	3183	Homo sapiens	CLIP-seq	starBase	None	0.5483
RAID04113367	PYY2	lncRNA	23615	Homo sapiens	EP300	protein	2033	Homo sapiens	ChIP-seq	ChIPBase	None	0.5483
RAID04113379	CTBP1-AS2	lncRNA	92070	Homo sapiens	TIAL1	protein	7073	Homo sapiens	CLIP-seq	starBase	None	0.5483
RAID04113392	FARP1	lncRNA	10160	Homo sapiens	E2F6	protein	1876	Homo sapiens	ChIP-seq	ChIPBase	None	0.5483
RAID04113397	Prss56	lncRNA	69453	Mus musculus	Tbx5	protein	21388	Mus musculus	ChIP-seq	ChIPBase	None	0.5483
RAID04113430	LOC100507205	lncRNA	100507205	Homo sapiens	SPI1	protein	6688	Homo sapiens	ChIP-seq	ChIPBase	None	0.5483
RAID04113456	LINC00237	lncRNA	101180898	Homo sapiens	JUND	protein	3727	Homo sapiens	ChIP-seq	ChIPBase	None	0.5483
RAID04113486	G730013B05Rik	lncRNA	619312	Mus musculus	Ctsb	protein	13030	Mus musculus	Microarray//RNA-seq	LncRNA2Target	None	0.6606
RAID04113533	4930534D22Rik	lncRNA	78187	Mus musculus	Rad21	protein	19357	Mus musculus	ChIP-seq	ChIPBase	None	0.5483
RAID04113561	ANCR	lncRNA	282	Homo sapiens	TLCD2	protein	727910	Homo sapiens	Microarray//RNA-seq	LncRNA2Target	None	0.6606
RAID04113563	Gm2885	lncRNA	100040654	Mus musculus	Cebpa	protein	12606	Mus musculus	ChIP-seq	ChIPBase	None	0.5483
RAID04113639	Gm16938	lncRNA	330599	Mus musculus	Rbbp5	protein	213464	Mus musculus	ChIP-seq	ChIPBase	None	0.5483
RAID04113651	4930401G09Rik	lncRNA	73792	Mus musculus	Rad21	protein	19357	Mus musculus	ChIP-seq	ChIPBase	None	0.5483
RAID04113662	LOC441242	lncRNA	441242	Homo sapiens	TAF1	protein	6872	Homo sapiens	ChIP-seq	ChIPBase	None	0.5483
RAID04113681	MYLK-AS1	lncRNA	100506826	Homo sapiens	UPF1	protein	5976	Homo sapiens	CLIP-seq	starBase	None	0.5483
RAID04113695	MALAT1	lncRNA	378938	Homo sapiens	DDX55	protein	57696	Homo sapiens	Microarray//RNA-seq	LncRNA2Target	None	0.6606
RAID04113707	UG0898H09	lncRNA	643763	Homo sapiens	E2F6	protein	1876	Homo sapiens	ChIP-seq	ChIPBase	None	0.5483
RAID04113736	LOC439994	lncRNA	439994	Homo sapiens	REST	protein	5978	Homo sapiens	ChIP-seq	ChIPBase	None	0.5483
RAID04113769	KCNC4-AS1	lncRNA	100873974	Homo sapiens	EBF1	protein	1879	Homo sapiens	ChIP-seq	ChIPBase	None	0.5483
RAID04113782	FENDRR	lncRNA	400550	Homo sapiens	NNT	protein	23530	Homo sapiens	Microarray//RNA-seq	LncRNA2Target	None	0.6606
RAID04113794	LMO7-AS1	lncRNA	101927155	Homo sapiens	HEY1	protein	23462	Homo sapiens	ChIP-seq	ChIPBase	None	0.5483
RAID04113797	A830052D11Rik	lncRNA	402767	Mus musculus	Suz12	protein	52615	Mus musculus	ChIP-seq	ChIPBase	None	0.5483
RAID04113807	TUG1	lncRNA	55000	Homo sapiens	RGS4	protein	5999	Homo sapiens	Microarray//RNA-seq	LncRNA2Target	None	0.6606
RAID04113814	Ttc39aos1	lncRNA	102635290	Mus musculus	Cideb	protein	12684	Mus musculus	Western Blot//RT-PCR	LncRNA2Target	22155924	0.8808
RAID04113820	FENDRR	lncRNA	400550	Homo sapiens	RPS27L	protein	51065	Homo sapiens	Microarray//RNA-seq	LncRNA2Target	None	0.6606
RAID04113839	Gm11454	lncRNA	100504589	Mus musculus	Ebf1	protein	13591	Mus musculus	ChIP-seq	ChIPBase	None	0.5483
RAID04113847	ITPK1-AS1	lncRNA	319085	Homo sapiens	BCL11A	protein	53335	Homo sapiens	ChIP-seq	ChIPBase	None	0.5483
RAID04113883	FENDRR	lncRNA	400550	Homo sapiens	C1orf115	protein	79762	Homo sapiens	Microarray//RNA-seq	LncRNA2Target	None	0.6606
RAID04113940	MALAT1	lncRNA	378938	Homo sapiens	GPR155	protein	151556	Homo sapiens	Microarray//RNA-seq	LncRNA2Target	None	0.6606
RAID04113948	CRNDE	lncRNA	643911	Homo sapiens	UBE3D	protein	90025	Homo sapiens	Microarray//RNA-seq	LncRNA2Target	None	0.6606
RAID04113983	ANCR	lncRNA	282	Homo sapiens	THBS1	protein	7057	Homo sapiens	Microarray//RNA-seq	LncRNA2Target	None	0.6606
RAID04114036	Gm17586	lncRNA	100504040	Mus musculus	Ep300	protein	328572	Mus musculus	ChIP-seq	ChIPBase	None	0.5483
RAID04114046	FENDRR	lncRNA	400550	Homo sapiens	GABARAPL1	protein	23710	Homo sapiens	Microarray//RNA-seq	LncRNA2Target	None	0.6606
RAID04114102	ZDHHC8P1	lncRNA	150244	Homo sapiens	HNF4A	protein	3172	Homo sapiens	ChIP-seq	ChIPBase	None	0.5483
RAID04114123	LINC00708	lncRNA	100507143	Homo sapiens	CDX2	protein	1045	Homo sapiens	ChIP-seq	ChIPBase	None	0.5483
RAID04114127	MYEOV	lncRNA	26579	Homo sapiens	POU2F2	protein	5452	Homo sapiens	ChIP-seq	ChIPBase	None	0.5483
RAID04114181	BANCR	lncRNA	100885775	Homo sapiens	TCP11L2	protein	255394	Homo sapiens	Microarray//RNA-seq	LncRNA2Target	None	0.6606
RAID04114255	TUG1	lncRNA	55000	Homo sapiens	HELLS	protein	3070	Homo sapiens	Microarray//RNA-seq	LncRNA2Target	None	0.6606
RAID04114369	LINC00475	lncRNA	105379831	Homo sapiens	REST	protein	5978	Homo sapiens	ChIP-seq	ChIPBase	None	0.5483
RAID04114385	LOC100131655	lncRNA	100131655	Homo sapiens	SP1	protein	6667	Homo sapiens	ChIP-seq	ChIPBase	None	0.5483
RAID04114405	PWRN2	lncRNA	791115	Homo sapiens	FUS	protein	2521	Homo sapiens	CLIP-seq	starBase	None	0.5483
RAID04114428	SMG7-AS1	lncRNA	284649	Homo sapiens	PBX3	protein	5090	Homo sapiens	ChIP-seq	ChIPBase	None	0.5483
RAID04114446	TUG1	lncRNA	55000	Homo sapiens	PMPCB	protein	9512	Homo sapiens	Microarray//RNA-seq	LncRNA2Target	None	0.6606
RAID04114465	FENDRR	lncRNA	400550	Homo sapiens	ABCF3	protein	55324	Homo sapiens	Microarray//RNA-seq	LncRNA2Target	None	0.6606
RAID04114474	4933408J17Rik	lncRNA	74454	Mus musculus	Foxa2	protein	15376	Mus musculus	ChIP-seq	ChIPBase	None	0.5483
RAID04114480	MINOS1P1	lncRNA	100462953	Homo sapiens	CTCF	protein	10664	Homo sapiens	ChIP-seq	ChIPBase	None	0.5483
RAID04114485	FENDRR	lncRNA	400550	Homo sapiens	MLH1	protein	4292	Homo sapiens	Microarray//RNA-seq	LncRNA2Target	None	0.6606
RAID04114489	LINC00339	lncRNA	29092	Homo sapiens	ERG	protein	2078	Homo sapiens	ChIP-seq	ChIPBase	None	0.5483
RAID04114507	Gm5091	lncRNA	328747	Mus musculus	E2f1	protein	13555	Mus musculus	ChIP-seq	ChIPBase	None	0.5483
RAID04114556	Gm12603	lncRNA	100040617	Mus musculus	Lmo2	protein	16909	Mus musculus	ChIP-seq	ChIPBase	None	0.5483
RAID04114580	G730013B05Rik	lncRNA	619312	Mus musculus	Srsf10	protein	14105	Mus musculus	Microarray//RNA-seq	LncRNA2Target	None	0.6606
RAID04114591	MTMR2	lncRNA	8898	Homo sapiens	SMARCB1	protein	6598	Homo sapiens	ChIP-seq	ChIPBase	None	0.5483
RAID04114600	TUG1	lncRNA	55000	Homo sapiens	DENND6A	protein	201627	Homo sapiens	Microarray//RNA-seq	LncRNA2Target	None	0.6606
RAID04114673	Gm4675	lncRNA	100043825	Mus musculus	Fus	protein	233908	Mus musculus	CLIP-seq	starBase	None	0.5483
RAID04114722	LINC00235	lncRNA	64493	Homo sapiens	TCF7L2	protein	6934	Homo sapiens	ChIP-seq	ChIPBase	None	0.5483
RAID04114768	HNRNPU	lncRNA	3192	Homo sapiens	RTCB	protein	51493	Homo sapiens	CLIP-seq	starBase	None	0.5483
RAID04114778	LRRC8C	lncRNA	84230	Homo sapiens	SMAD4	protein	4089	Homo sapiens	ChIP-seq	ChIPBase	None	0.5483
RAID04114799	CRNDE	lncRNA	643911	Homo sapiens	PLPPR4	protein	9890	Homo sapiens	Microarray//RNA-seq	LncRNA2Target	None	0.6606
RAID04114805	Fendrr	lncRNA	68790	Mus musculus	Ccdc121	protein	403180	Mus musculus	Microarray//RNA-seq	LncRNA2Target	None	0.6606
RAID04114827	CMBL	lncRNA	134147	Homo sapiens	GATA6	protein	2627	Homo sapiens	ChIP-seq	ChIPBase	None	0.5483
RAID04114999	Nctc1	lncRNA	330677	Mus musculus	Fus	protein	233908	Mus musculus	CLIP-seq	starBase	None	0.5483
RAID04115003	FAM223A	lncRNA	100132967	Homo sapiens	NR3C1	protein	2908	Homo sapiens	ChIP-seq	ChIPBase	None	0.5483
RAID04115026	SEPT7P2	lncRNA	641977	Homo sapiens	TAF1	protein	6872	Homo sapiens	ChIP-seq	ChIPBase	None	0.5483
RAID04115043	TUG1	lncRNA	55000	Homo sapiens	ZNF565	protein	147929	Homo sapiens	Microarray//RNA-seq	LncRNA2Target	None	0.6606
RAID04115054	CRNDE	lncRNA	643911	Homo sapiens	RNF121	protein	55298	Homo sapiens	Microarray//RNA-seq	LncRNA2Target	None	0.6606
RAID04115083	ANCR	lncRNA	282	Homo sapiens	FAM114A1	protein	92689	Homo sapiens	Microarray//RNA-seq	LncRNA2Target	None	0.6606
RAID04115090	G730013B05Rik	lncRNA	619312	Mus musculus	Phc2	protein	54383	Mus musculus	Microarray//RNA-seq	LncRNA2Target	None	0.6606
RAID04115115	LINC00518	lncRNA	221718	Homo sapiens	U2AF2	protein	11338	Homo sapiens	CLIP-seq	starBase	None	0.5483
RAID04115209	TUG1	lncRNA	55000	Homo sapiens	HSD17B14	protein	51171	Homo sapiens	Microarray//RNA-seq	LncRNA2Target	None	0.6606
RAID04115258	CNPY4	lncRNA	245812	Homo sapiens	BCL3	protein	602	Homo sapiens	ChIP-seq	ChIPBase	None	0.5483
RAID04115265	LINC00630	lncRNA	100287765	Homo sapiens	FMR1	protein	2332	Homo sapiens	CLIP-seq	starBase	None	0.5483
RAID04115301	MALAT1	lncRNA	378938	Homo sapiens	TC2N	protein	123036	Homo sapiens	Microarray//RNA-seq	LncRNA2Target	None	0.6606
RAID04115355	CHRM3	lncRNA	1131	Homo sapiens	CTCF	protein	10664	Homo sapiens	ChIP-seq	ChIPBase	None	0.5483
RAID04115359	MALAT1	lncRNA	378938	Homo sapiens	HIST1H2AB	protein	8335	Homo sapiens	Microarray//RNA-seq	LncRNA2Target	None	0.6606
RAID04115412	LINC00315	lncRNA	246704	Homo sapiens	BCL3	protein	602	Homo sapiens	ChIP-seq	ChIPBase	None	0.5483
RAID04115422	CRNDE	lncRNA	643911	Homo sapiens	NFKBIA	protein	4792	Homo sapiens	Microarray//RNA-seq	LncRNA2Target	None	0.6606
RAID04115441	ZNF736	lncRNA	728927	Homo sapiens	E2F4	protein	1874	Homo sapiens	ChIP-seq	ChIPBase	None	0.5483
RAID04115452	RAI1	lncRNA	10743	Homo sapiens	MAX	protein	4149	Homo sapiens	ChIP-seq	ChIPBase	None	0.5483
RAID04115505	EMX2OS	lncRNA	105378503	Homo sapiens	CDX2	protein	1045	Homo sapiens	ChIP-seq	ChIPBase	None	0.5483
RAID04115506	D430036J16Rik	lncRNA	319405	Mus musculus	Mtf2	protein	17765	Mus musculus	ChIP-seq	ChIPBase	None	0.5483
RAID04115556	SLC37A4	lncRNA	2542	Homo sapiens	LIN28A	protein	79727	Homo sapiens	CLIP-seq	starBase	None	0.5483
RAID04115585	TUG1	lncRNA	55000	Homo sapiens	FAM26F	protein	441168	Homo sapiens	Microarray//RNA-seq	LncRNA2Target	None	0.6606
RAID04115595	SNHG8	lncRNA	100093630	Homo sapiens	EIF4A3	protein	9775	Homo sapiens	CLIP-seq	starBase	None	0.5483
RAID04115618	MALAT1	lncRNA	378938	Homo sapiens	TMEM43	protein	79188	Homo sapiens	Microarray//RNA-seq	LncRNA2Target	None	0.6606
RAID04115653	BC065403	lncRNA	100502819	Mus musculus	Ctcf	protein	13018	Mus musculus	ChIP-seq	ChIPBase	None	0.5483
RAID04115658	Gm12063	lncRNA	100042256	Mus musculus	Ptbp2	protein	56195	Mus musculus	CLIP-seq	starBase	None	0.5483
RAID04115659	TPD52	lncRNA	7163	Homo sapiens	RAD21	protein	5885	Homo sapiens	ChIP-seq	ChIPBase	None	0.5483
RAID04115711	1700028E10Rik	lncRNA	625175	Mus musculus	Ctcf	protein	13018	Mus musculus	ChIP-seq	ChIPBase	None	0.5483
RAID04115730	MALAT1	lncRNA	378938	Homo sapiens	C3orf17	protein	25871	Homo sapiens	Microarray//RNA-seq	LncRNA2Target	None	0.6606
RAID04115736	LINC00167	lncRNA	440072	Homo sapiens	DGCR8	protein	54487	Homo sapiens	CLIP-seq	starBase	None	0.5483
RAID04115775	Gm17435	lncRNA	100503374	Mus musculus	Fli1	protein	14247	Mus musculus	ChIP-seq	ChIPBase	None	0.5483
RAID04115828	G730013B05Rik	lncRNA	619312	Mus musculus	Lpin3	protein	64899	Mus musculus	Microarray//RNA-seq	LncRNA2Target	None	0.6606
RAID04115849	ANCR	lncRNA	282	Homo sapiens	MUC1	protein	4582	Homo sapiens	Microarray//RNA-seq	LncRNA2Target	None	0.6606
RAID04115907	FENDRR	lncRNA	400550	Homo sapiens	GALNT15	protein	117248	Homo sapiens	Microarray//RNA-seq	LncRNA2Target	None	0.6606
RAID04115937	MIR3179-3	lncRNA	100423006	Homo sapiens	CEBPB	protein	1051	Homo sapiens	ChIP-seq	ChIPBase	None	0.5483
RAID04115940	THUMPD3-AS1	lncRNA	440944	Homo sapiens	FUS	protein	2521	Homo sapiens	CLIP-seq	starBase	None	0.5483
RAID04115951	FENDRR	lncRNA	400550	Homo sapiens	PJA2	protein	9867	Homo sapiens	Microarray//RNA-seq	LncRNA2Target	None	0.6606
RAID04116012	ZNF503-AS1	lncRNA	253264	Homo sapiens	NFYB	protein	4801	Homo sapiens	ChIP-seq	ChIPBase	None	0.5483
RAID04116034	HAR1B	lncRNA	768097	Homo sapiens	TCF12	protein	6938	Homo sapiens	ChIP-seq	ChIPBase	None	0.5483
RAID04116038	TUG1	lncRNA	55000	Homo sapiens	CAMK2D	protein	817	Homo sapiens	Microarray//RNA-seq	LncRNA2Target	None	0.6606
RAID04116039	CRNDE	lncRNA	643911	Homo sapiens	NT5C3B	protein	115024	Homo sapiens	Microarray//RNA-seq	LncRNA2Target	None	0.6606
RAID04116051	TUG1	lncRNA	55000	Homo sapiens	TMOD2	protein	29767	Homo sapiens	Microarray//RNA-seq	LncRNA2Target	None	0.6606
RAID04116093	TPD52	lncRNA	7163	Homo sapiens	GATA6	protein	2627	Homo sapiens	ChIP-seq	ChIPBase	None	0.5483
RAID04116108	NBPF25P	lncRNA	101929780	Homo sapiens	E2F6	protein	1876	Homo sapiens	ChIP-seq	ChIPBase	None	0.5483
RAID04116153	AAA1	lncRNA	100329167	Homo sapiens	PPARG	protein	5468	Homo sapiens	ChIP-seq	ChIPBase	None	0.5483
RAID04116182	XIST	lncRNA	7503	Homo sapiens	SUZ12	protein	23512	Homo sapiens	EMSA (electrophoretic mobility shift assay)//Nucleic acid uv cross-linking assay//NGS (Next Generation Sequencing)	RAID	26883116//26177152//26183952	0.9462
RAID04116215	SNHG12	lncRNA	85028	Homo sapiens	BATF	protein	10538	Homo sapiens	ChIP-seq	ChIPBase	None	0.5483
RAID04116252	1700007L15Rik	lncRNA	100502742	Mus musculus	Kcnj9	protein	16524	Mus musculus	Microarray//RNA-seq	LncRNA2Target	None	0.6606
RAID04116260	CFL1	lncRNA	1072	Homo sapiens	PBX3	protein	5090	Homo sapiens	ChIP-seq	ChIPBase	None	0.5483
RAID04116262	MATN1-AS1	lncRNA	100129196	Homo sapiens	PTBP1	protein	5725	Homo sapiens	CLIP-seq	starBase	None	0.5483
RAID04116272	TUG1	lncRNA	55000	Homo sapiens	SLC36A1	protein	206358	Homo sapiens	Microarray//RNA-seq	LncRNA2Target	None	0.6606
RAID04116293	LINC00327	lncRNA	100506697	Homo sapiens	FUS	protein	2521	Homo sapiens	CLIP-seq	starBase	None	0.5483
RAID04116379	DANCR	lncRNA	57291	Homo sapiens	JUN	protein	3725	Homo sapiens	ChIP-seq	ChIPBase	None	0.5483
RAID04116403	PTRHD1	lncRNA	391356	Homo sapiens	TCF12	protein	6938	Homo sapiens	ChIP-seq	ChIPBase	None	0.5483
RAID04116479	TTLL7-IT1	lncRNA	100874314	Homo sapiens	DGCR8	protein	54487	Homo sapiens	CLIP-seq	starBase	None	0.5483
RAID04116523	MALAT1	lncRNA	378938	Homo sapiens	TGM2	protein	7052	Homo sapiens	Microarray//RNA-seq	LncRNA2Target	None	0.6606
RAID04116535	Gm16702	lncRNA	100504601	Mus musculus	Spi1	protein	20375	Mus musculus	ChIP-seq	ChIPBase	None	0.5483
RAID04116560	SSR4P1	lncRNA	728039	Homo sapiens	E2F6	protein	1876	Homo sapiens	ChIP-seq	ChIPBase	None	0.5483
RAID04116573	LOC646268	lncRNA	646268	Homo sapiens	MAX	protein	4149	Homo sapiens	ChIP-seq	ChIPBase	None	0.5483
RAID04116591	G730013B05Rik	lncRNA	619312	Mus musculus	Frk	protein	14302	Mus musculus	Microarray//RNA-seq	LncRNA2Target	None	0.6606
RAID04116637	SNHG6	lncRNA	641638	Homo sapiens	MAX	protein	4149	Homo sapiens	ChIP-seq	ChIPBase	None	0.5483
RAID04116638	LOC648987	lncRNA	648987	Homo sapiens	AR	protein	367	Homo sapiens	ChIP-seq	ChIPBase	None	0.5483
RAID04116671	LINC00299	lncRNA	339789	Homo sapiens	HEY1	protein	23462	Homo sapiens	ChIP-seq	ChIPBase	None	0.5483
RAID04116695	5730422E09Rik	lncRNA	433966	Mus musculus	Sin3a	protein	20466	Mus musculus	ChIP-seq	ChIPBase	None	0.5483
RAID04116719	ANCR	lncRNA	282	Homo sapiens	SKA1	protein	220134	Homo sapiens	Microarray//RNA-seq	LncRNA2Target	None	0.6606
RAID04116742	MALAT1	lncRNA	378938	Homo sapiens	DPF3	protein	8110	Homo sapiens	Microarray//RNA-seq	LncRNA2Target	None	0.6606
RAID04116783	LINC00094	lncRNA	266655	Homo sapiens	FMR1	protein	2332	Homo sapiens	CLIP-seq	starBase	None	0.5483
RAID04116815	VSIG10	lncRNA	54621	Homo sapiens	E2F1	protein	1869	Homo sapiens	ChIP-seq	ChIPBase	None	0.5483
RAID04116885	HCG20	lncRNA	105375013	Homo sapiens	SMARCB1	protein	6598	Homo sapiens	ChIP-seq	ChIPBase	None	0.5483
RAID04116892	Gm10629	lncRNA	100038487	Mus musculus	Cebpa	protein	12606	Mus musculus	ChIP-seq	ChIPBase	None	0.5483
RAID04116898	MALAT1	lncRNA	378938	Homo sapiens	TCF25	protein	22980	Homo sapiens	Microarray//RNA-seq	LncRNA2Target	None	0.6606
RAID04116917	LINC00271	lncRNA	100131814	Homo sapiens	BATF	protein	10538	Homo sapiens	ChIP-seq	ChIPBase	None	0.5483
RAID04116924	Gm17619	lncRNA	100502923	Mus musculus	E2f1	protein	13555	Mus musculus	ChIP-seq	ChIPBase	None	0.5483
RAID04116971	Sox5os4	lncRNA	102633928	Mus musculus	Runx1	protein	12394	Mus musculus	ChIP-seq	ChIPBase	None	0.5483
RAID04116976	RPL23AP82	lncRNA	284942	Homo sapiens	SP1	protein	6667	Homo sapiens	ChIP-seq	ChIPBase	None	0.5483
RAID04116988	MIAT	lncRNA	440823	Homo sapiens	TAF1	protein	6872	Homo sapiens	ChIP-seq	ChIPBase	None	0.5483
RAID04117025	UCN2	lncRNA	90226	Homo sapiens	SRP9	protein	6726	Homo sapiens	X-ray crystallography	RAID	11089964	0.7311
RAID04117044	ERVK3-1	lncRNA	100507739	Homo sapiens	TAF1	protein	6872	Homo sapiens	ChIP-seq	ChIPBase	None	0.5483
RAID04117049	5330416C01Rik	lncRNA	403201	Mus musculus	Gata1	protein	14460	Mus musculus	ChIP-seq	ChIPBase	None	0.5483
RAID04117061	MALAT1	lncRNA	378938	Homo sapiens	ARMCX2	protein	9823	Homo sapiens	Microarray//RNA-seq	LncRNA2Target	None	0.6606
RAID04117130	TUG1	lncRNA	55000	Homo sapiens	SP1	protein	6667	Homo sapiens	ChIP-seq	ChIPBase	None	0.5483
RAID04117186	SNHG7	lncRNA	84973	Homo sapiens	HNRNPC	protein	3183	Homo sapiens	CLIP-seq	starBase	None	0.5483
RAID04117313	MALAT1	lncRNA	378938	Homo sapiens	LOC100129363	protein	100129363	Homo sapiens	Microarray//RNA-seq	LncRNA2Target	None	0.6606
RAID04117360	GTSE1-AS1	lncRNA	150384	Homo sapiens	SPDEF	protein	25803	Homo sapiens	ChIP-seq	ChIPBase	None	0.5483
RAID04117371	FENDRR	lncRNA	400550	Homo sapiens	IL24	protein	11009	Homo sapiens	Microarray//RNA-seq	LncRNA2Target	None	0.6606
RAID04117427	CA13	lncRNA	377677	Homo sapiens	CDX2	protein	1045	Homo sapiens	ChIP-seq	ChIPBase	None	0.5483
RAID04117482	CRNDE	lncRNA	643911	Homo sapiens	GTF2A2	protein	2958	Homo sapiens	Microarray//RNA-seq	LncRNA2Target	None	0.6606
RAID04117502	MALAT1	lncRNA	378938	Homo sapiens	ATP2A1	protein	487	Homo sapiens	Microarray//RNA-seq	LncRNA2Target	None	0.6606
RAID04117529	LOC645166	lncRNA	645166	Homo sapiens	CDX2	protein	1045	Homo sapiens	ChIP-seq	ChIPBase	None	0.5483
RAID04117554	PYY2	lncRNA	23615	Homo sapiens	CDX2	protein	1045	Homo sapiens	ChIP-seq	ChIPBase	None	0.5483
RAID04117555	LINC00237	lncRNA	101180898	Homo sapiens	SUZ12	protein	23512	Homo sapiens	ChIP-seq	ChIPBase	None	0.5483
RAID04117631	FENDRR	lncRNA	400550	Homo sapiens	SLC35B4	protein	84912	Homo sapiens	Microarray//RNA-seq	LncRNA2Target	None	0.6606
RAID04117640	FENDRR	lncRNA	400550	Homo sapiens	NMRK1	protein	54981	Homo sapiens	Microarray//RNA-seq	LncRNA2Target	None	0.6606
RAID04117651	LOC728730	lncRNA	728730	Homo sapiens	YY1	protein	7528	Homo sapiens	ChIP-seq	ChIPBase	None	0.5483
RAID04117653	1700041M05Rik	lncRNA	73260	Mus musculus	Ctcf	protein	13018	Mus musculus	ChIP-seq	ChIPBase	None	0.5483
RAID04117660	MALAT1	lncRNA	378938	Homo sapiens	NPLOC4	protein	55666	Homo sapiens	Microarray//RNA-seq	LncRNA2Target	None	0.6606
RAID04117678	CRNDE	lncRNA	643911	Homo sapiens	THOP1	protein	7064	Homo sapiens	Microarray//RNA-seq	LncRNA2Target	None	0.6606
RAID04117718	SMIM10L2A	lncRNA	399668	Homo sapiens	DGCR8	protein	54487	Homo sapiens	CLIP-seq	starBase	None	0.5483
RAID04117814	Gm15340	lncRNA	100040997	Mus musculus	Cebpa	protein	12606	Mus musculus	ChIP-seq	ChIPBase	None	0.5483
RAID04117851	5730422E09Rik	lncRNA	433966	Mus musculus	Foxa2	protein	15376	Mus musculus	ChIP-seq	ChIPBase	None	0.5483
RAID04117865	Gm16853	lncRNA	330902	Mus musculus	Cebpb	protein	12608	Mus musculus	ChIP-seq	ChIPBase	None	0.5483
RAID04117911	C030010L15Rik	lncRNA	77312	Mus musculus	Wdr5	protein	140858	Mus musculus	ChIP-seq	ChIPBase	None	0.5483
RAID04117918	TUG1	lncRNA	55000	Homo sapiens	DACT3	protein	147906	Homo sapiens	Microarray//RNA-seq	LncRNA2Target	None	0.6606
RAID04117944	ZBED9	lncRNA	114821	Homo sapiens	BDP1	protein	55814	Homo sapiens	ChIP-seq	ChIPBase	None	0.5483
RAID04117951	TUG1	lncRNA	55000	Homo sapiens	RHBDD2	protein	57414	Homo sapiens	Microarray//RNA-seq	LncRNA2Target	None	0.6606
RAID04118008	FENDRR	lncRNA	400550	Homo sapiens	PACSIN3	protein	29763	Homo sapiens	Microarray//RNA-seq	LncRNA2Target	None	0.6606
RAID04118017	PVT1	lncRNA	5820	Homo sapiens	FUS	protein	2521	Homo sapiens	CLIP-seq	starBase	None	0.5483
RAID04118020	DGCR9	lncRNA	25787	Homo sapiens	STAT1	protein	6772	Homo sapiens	ChIP-seq	ChIPBase	None	0.5483
RAID04118067	LINC00244	lncRNA	64433	Homo sapiens	BCL11A	protein	53335	Homo sapiens	ChIP-seq	ChIPBase	None	0.5483
RAID04118113	PDE4DIP	lncRNA	9659	Homo sapiens	POU5F1	protein	5460	Homo sapiens	ChIP-seq	ChIPBase	None	0.5483
RAID04118252	Mir706	lncRNA	735290	Mus musculus	Rbbp5	protein	213464	Mus musculus	ChIP-seq	ChIPBase	None	0.5483
RAID04118294	4930480K23Rik	lncRNA	75016	Mus musculus	Sin3b	protein	20467	Mus musculus	ChIP-seq	ChIPBase	None	0.5483
RAID04118316	FENDRR	lncRNA	400550	Homo sapiens	SMAP1	protein	60682	Homo sapiens	Microarray//RNA-seq	LncRNA2Target	None	0.6606
RAID04118375	CRNDE	lncRNA	643911	Homo sapiens	TCEAL7	protein	56849	Homo sapiens	Microarray//RNA-seq	LncRNA2Target	None	0.6606
RAID04118387	Gm13056	lncRNA	100503810	Mus musculus	Foxa2	protein	15376	Mus musculus	ChIP-seq	ChIPBase	None	0.5483
RAID04118416	TUG1	lncRNA	55000	Homo sapiens	ARSE	protein	415	Homo sapiens	Microarray//RNA-seq	LncRNA2Target	None	0.6606
RAID04118520	Gm16350	lncRNA	102638701	Mus musculus	Fus	protein	233908	Mus musculus	CLIP-seq	starBase	None	0.5483
RAID04118545	Gm4651	lncRNA	100043793	Mus musculus	Spi1	protein	20375	Mus musculus	ChIP-seq	ChIPBase	None	0.5483
RAID04118562	LINC00322	lncRNA	100126693	Homo sapiens	JUN	protein	3725	Homo sapiens	ChIP-seq	ChIPBase	None	0.5483
RAID04118618	FENDRR	lncRNA	400550	Homo sapiens	JAM2	protein	58494	Homo sapiens	Microarray//RNA-seq	LncRNA2Target	None	0.6606
RAID04118633	JRK	lncRNA	8629	Homo sapiens	IGF2BP3	protein	10643	Homo sapiens	CLIP-seq	starBase	None	0.5483
RAID04118647	CRNDE	lncRNA	643911	Homo sapiens	ACAT2	protein	39	Homo sapiens	Microarray//RNA-seq	LncRNA2Target	None	0.6606
RAID04118662	LOC100272217	lncRNA	100272217	Homo sapiens	GTF2B	protein	2959	Homo sapiens	ChIP-seq	ChIPBase	None	0.5483
RAID04118681	MIR4500HG	lncRNA	642345	Homo sapiens	MYC	protein	4609	Homo sapiens	ChIP-seq	ChIPBase	None	0.5483
RAID04118697	Gm17238	lncRNA	100503627	Mus musculus	E2f4	protein	104394	Mus musculus	ChIP-seq	ChIPBase	None	0.5483
RAID04118762	BEAN1-AS1	lncRNA	101927726	Homo sapiens	EIF4A3	protein	9775	Homo sapiens	CLIP-seq	starBase	None	0.5483
RAID04118780	CLUHP3	lncRNA	100132341	Homo sapiens	NFYB	protein	4801	Homo sapiens	ChIP-seq	ChIPBase	None	0.5483
RAID04118826	LOC100288911	lncRNA	100288911	Homo sapiens	HNF4A	protein	3172	Homo sapiens	ChIP-seq	ChIPBase	None	0.5483
RAID04118862	GRK4	lncRNA	2868	Homo sapiens	SMARCC1	protein	6599	Homo sapiens	ChIP-seq	ChIPBase	None	0.5483
RAID04118889	Malat1	lncRNA	72289	Mus musculus	Myb	protein	17863	Mus musculus	ChIP-seq	ChIPBase	None	0.5483
RAID04118891	MALAT1	lncRNA	378938	Homo sapiens	LLGL1	protein	3996	Homo sapiens	Microarray//RNA-seq	LncRNA2Target	None	0.6606
RAID04118916	TUG1	lncRNA	55000	Homo sapiens	C8G	protein	733	Homo sapiens	Microarray//RNA-seq	LncRNA2Target	None	0.6606
RAID04118933	LINC00184	lncRNA	100302691	Homo sapiens	NRF1	protein	4899	Homo sapiens	ChIP-seq	ChIPBase	None	0.5483
RAID04118939	ITGB6	lncRNA	3694	Homo sapiens	RAD21	protein	5885	Homo sapiens	ChIP-seq	ChIPBase	None	0.5483
RAID04118970	MIAT	lncRNA	440823	Homo sapiens	TCF12	protein	6938	Homo sapiens	ChIP-seq	ChIPBase	None	0.5483
RAID04119015	LOC283585	lncRNA	283585	Homo sapiens	CDX2	protein	1045	Homo sapiens	ChIP-seq	ChIPBase	None	0.5483
RAID04119028	4930465M20Rik	lncRNA	74968	Mus musculus	Cebpb	protein	12608	Mus musculus	ChIP-seq	ChIPBase	None	0.5483
RAID04119034	CRNDE	lncRNA	643911	Homo sapiens	SPRY2	protein	10253	Homo sapiens	Microarray//RNA-seq	LncRNA2Target	None	0.6606
RAID04119037	FENDRR	lncRNA	400550	Homo sapiens	FXR1	protein	8087	Homo sapiens	Microarray//RNA-seq	LncRNA2Target	None	0.6606
RAID04119107	MALAT1	lncRNA	378938	Homo sapiens	P3H1	protein	64175	Homo sapiens	Microarray//RNA-seq	LncRNA2Target	None	0.6606
RAID04119130	ANCR	lncRNA	282	Homo sapiens	DHRS9	protein	10170	Homo sapiens	Microarray//RNA-seq	LncRNA2Target	None	0.6606
RAID04119141	MALAT1	lncRNA	378938	Homo sapiens	GNA15	protein	2769	Homo sapiens	Microarray//RNA-seq	LncRNA2Target	None	0.6606
RAID04119158	HULC	lncRNA	728655	Homo sapiens	CNOT1	protein	23019	Homo sapiens	RNA interference	NPInter	23728852	0.7311
RAID04119196	6430562O15Rik	lncRNA	320893	Mus musculus	Erg	protein	13876	Mus musculus	ChIP-seq	ChIPBase	None	0.5483
RAID04119305	LOC389641	lncRNA	389641	Homo sapiens	CDX2	protein	1045	Homo sapiens	ChIP-seq	ChIPBase	None	0.5483
RAID04119333	TUG1	lncRNA	55000	Homo sapiens	C17orf80	protein	55028	Homo sapiens	Microarray//RNA-seq	LncRNA2Target	None	0.6606
RAID04119337	SNHG7	lncRNA	84973	Homo sapiens	ELAVL1	protein	1994	Homo sapiens	CLIP-seq	starBase	None	0.5483
RAID04119346	PSMG3-AS1	lncRNA	114796	Homo sapiens	FUS	protein	2521	Homo sapiens	CLIP-seq	starBase	None	0.5483
RAID04119399	MALAT1	lncRNA	378938	Homo sapiens	CDKN2AIP	protein	55602	Homo sapiens	Microarray//RNA-seq	LncRNA2Target	None	0.6606
RAID04119403	MALAT1	lncRNA	378938	Homo sapiens	YPEL2	protein	388403	Homo sapiens	Microarray//RNA-seq	LncRNA2Target	None	0.6606
RAID04119443	2610020C07Rik	lncRNA	69918	Mus musculus	Tbx5	protein	21388	Mus musculus	ChIP-seq	ChIPBase	None	0.5483
RAID04119463	FENDRR	lncRNA	400550	Homo sapiens	KIAA0907	protein	22889	Homo sapiens	Microarray//RNA-seq	LncRNA2Target	None	0.6606
RAID04119482	FENDRR	lncRNA	400550	Homo sapiens	MRTO4	protein	51154	Homo sapiens	Microarray//RNA-seq	LncRNA2Target	None	0.6606
RAID04119508	PTENP1	lncRNA	11191	Homo sapiens	U2AF2	protein	11338	Homo sapiens	CLIP-seq	starBase	None	0.5483
RAID04119514	Gm16938	lncRNA	330599	Mus musculus	Ep300	protein	328572	Mus musculus	ChIP-seq	ChIPBase	None	0.5483
RAID04119549	Gm7677	lncRNA	665540	Mus musculus	Gata1	protein	14460	Mus musculus	ChIP-seq	ChIPBase	None	0.5483
RAID04119615	ANCR	lncRNA	282	Homo sapiens	EPB41L3	protein	23136	Homo sapiens	Microarray//RNA-seq	LncRNA2Target	None	0.6606
RAID04119622	Gm15850	lncRNA	329253	Mus musculus	Sirt1	protein	93759	Mus musculus	ChIP-seq	ChIPBase	None	0.5483
RAID04119681	CRNDE	lncRNA	643911	Homo sapiens	MST1	protein	4485	Homo sapiens	Microarray//RNA-seq	LncRNA2Target	None	0.6606
RAID04119693	CYP4B1	lncRNA	1580	Homo sapiens	GATA6	protein	2627	Homo sapiens	ChIP-seq	ChIPBase	None	0.5483
RAID04119738	Malat1	lncRNA	72289	Mus musculus	Spi1	protein	20375	Mus musculus	ChIP-seq	ChIPBase	None	0.5483
RAID04119782	1700061J23Rik	lncRNA	76993	Mus musculus	Rad21	protein	19357	Mus musculus	ChIP-seq	ChIPBase	None	0.5483
RAID04119797	Fendrr	lncRNA	68790	Mus musculus	Gm8362	protein	666918	Mus musculus	Microarray//RNA-seq	LncRNA2Target	None	0.6606
RAID04119831	UHRF1	lncRNA	29128	Homo sapiens	IGF2BP1	protein	10642	Homo sapiens	CLIP-seq	starBase	None	0.5483
RAID04119835	Gm2694	lncRNA	100040294	Mus musculus	Sirt1	protein	93759	Mus musculus	ChIP-seq	ChIPBase	None	0.5483
RAID04119873	Gm10629	lncRNA	100038487	Mus musculus	Tbx5	protein	21388	Mus musculus	ChIP-seq	ChIPBase	None	0.5483
RAID04119874	MALAT1	lncRNA	378938	Homo sapiens	DTD1	protein	92675	Homo sapiens	Microarray//RNA-seq	LncRNA2Target	None	0.6606
RAID04119887	PNKD	lncRNA	25953	Homo sapiens	BCL3	protein	602	Homo sapiens	ChIP-seq	ChIPBase	None	0.5483
RAID04119901	LINC00324	lncRNA	284029	Homo sapiens	HEY1	protein	23462	Homo sapiens	ChIP-seq	ChIPBase	None	0.5483
RAID04119948	SNHG15	lncRNA	285958	Homo sapiens	FMR1	protein	2332	Homo sapiens	CLIP-seq	starBase	None	0.5483
RAID04119955	ANCR	lncRNA	282	Homo sapiens	SCNN1B	protein	6338	Homo sapiens	Microarray//RNA-seq	LncRNA2Target	None	0.6606
RAID04119979	4930598A11Rik	lncRNA	117170	Mus musculus	Tbx5	protein	21388	Mus musculus	ChIP-seq	ChIPBase	None	0.5483
RAID04120001	Gm2694	lncRNA	100040294	Mus musculus	Flna	protein	192176	Mus musculus	Microarray//RNA-seq	LncRNA2Target	None	0.6606
RAID04120006	EHHADH-AS1	lncRNA	339926	Homo sapiens	DGCR8	protein	54487	Homo sapiens	CLIP-seq	starBase	None	0.5483
RAID04120008	HOTAIRM1	lncRNA	100506311	Homo sapiens	FOXH1	protein	8928	Homo sapiens	ChIP-seq	ChIPBase	None	0.5483
RAID04120097	C1QTNF9B-AS1	lncRNA	542767	Homo sapiens	FOXP2	protein	93986	Homo sapiens	ChIP-seq	ChIPBase	None	0.5483
RAID04120129	CRNDE	lncRNA	643911	Homo sapiens	GLE1	protein	2733	Homo sapiens	Microarray//RNA-seq	LncRNA2Target	None	0.6606
RAID04120133	2500002B13Rik	lncRNA	78353	Mus musculus	Sin3a	protein	20466	Mus musculus	ChIP-seq	ChIPBase	None	0.5483
RAID04120168	BANCR	lncRNA	100885775	Homo sapiens	MLC1	protein	23209	Homo sapiens	Microarray//RNA-seq	LncRNA2Target	None	0.6606
RAID04120189	PRIM2	lncRNA	5558	Homo sapiens	ELAVL1	protein	1994	Homo sapiens	CLIP-seq	starBase	None	0.5483
RAID04120197	5031434O11Rik	lncRNA	100039684	Mus musculus	Gata4	protein	14463	Mus musculus	ChIP-seq	ChIPBase	None	0.5483
RAID04120270	SNHG1	lncRNA	23642	Homo sapiens	POU2F2	protein	5452	Homo sapiens	ChIP-seq	ChIPBase	None	0.5483
RAID04120283	9530026P05Rik	lncRNA	330385	Mus musculus	Cebpb	protein	12608	Mus musculus	ChIP-seq	ChIPBase	None	0.5483
RAID04120290	LOC283856	lncRNA	283856	Homo sapiens	SMARCB1	protein	6598	Homo sapiens	ChIP-seq	ChIPBase	None	0.5483
RAID04120293	ANP32A	lncRNA	8125	Homo sapiens	EP300	protein	2033	Homo sapiens	ChIP-seq	ChIPBase	None	0.5483
RAID04120295	HAR1A	lncRNA	768096	Homo sapiens	MAX	protein	4149	Homo sapiens	ChIP-seq	ChIPBase	None	0.5483
RAID04120311	MALAT1	lncRNA	378938	Homo sapiens	NSUN2	protein	54888	Homo sapiens	Microarray//RNA-seq	LncRNA2Target	None	0.6606
RAID04120352	LINC00211	lncRNA	101929559	Homo sapiens	SMARCC2	protein	6601	Homo sapiens	ChIP-seq	ChIPBase	None	0.5483
RAID04120359	PRKCE	lncRNA	5581	Homo sapiens	RXRA	protein	6256	Homo sapiens	ChIP-seq	ChIPBase	None	0.5483
RAID04120380	CRNDE	lncRNA	643911	Homo sapiens	DNAJC11	protein	55735	Homo sapiens	Microarray//RNA-seq	LncRNA2Target	None	0.6606
RAID04120414	CRNDE	lncRNA	643911	Homo sapiens	ORMDL3	protein	94103	Homo sapiens	Microarray//RNA-seq	LncRNA2Target	None	0.6606
RAID04120479	FENDRR	lncRNA	400550	Homo sapiens	SRA1	protein	10011	Homo sapiens	Microarray//RNA-seq	LncRNA2Target	None	0.6606
RAID04120511	FENDRR	lncRNA	400550	Homo sapiens	WNT5B	protein	81029	Homo sapiens	Microarray//RNA-seq	LncRNA2Target	None	0.6606
RAID04120516	C21orf91-OT1	lncRNA	246312	Homo sapiens	FUS	protein	2521	Homo sapiens	CLIP-seq	starBase	None	0.5483
RAID04120521	1500011K16Rik	lncRNA	67885	Mus musculus	Fli1	protein	14247	Mus musculus	ChIP-seq	ChIPBase	None	0.5483
RAID04120555	9330175E14Rik	lncRNA	320377	Mus musculus	Stat3	protein	20848	Mus musculus	ChIP-seq	ChIPBase	None	0.5483
RAID04120564	TUG1	lncRNA	55000	Homo sapiens	MPC1	protein	51660	Homo sapiens	Microarray//RNA-seq	LncRNA2Target	None	0.6606
RAID04120567	FENDRR	lncRNA	400550	Homo sapiens	AMMECR1L	protein	83607	Homo sapiens	Microarray//RNA-seq	LncRNA2Target	None	0.6606
RAID04120636	TFEB	lncRNA	7942	Homo sapiens	JUND	protein	3727	Homo sapiens	ChIP-seq	ChIPBase	None	0.5483
RAID04120677	MALAT1	lncRNA	378938	Homo sapiens	TSKU	protein	25987	Homo sapiens	Microarray//RNA-seq	LncRNA2Target	None	0.6606
RAID04120678	WDR7-OT1	lncRNA	105601840	Homo sapiens	U2AF2	protein	11338	Homo sapiens	CLIP-seq	starBase	None	0.5483
RAID04120685	CRNDE	lncRNA	643911	Homo sapiens	FMOD	protein	2331	Homo sapiens	Microarray//RNA-seq	LncRNA2Target	None	0.6606
RAID04120724	MAGI2-AS3	lncRNA	100505881	Homo sapiens	SUZ12	protein	23512	Homo sapiens	ChIP-seq	ChIPBase	None	0.5483
RAID04120735	FENDRR	lncRNA	400550	Homo sapiens	ING4	protein	51147	Homo sapiens	Microarray//RNA-seq	LncRNA2Target	None	0.6606
RAID04120747	LOC285627	lncRNA	285627	Homo sapiens	HNF4A	protein	3172	Homo sapiens	ChIP-seq	ChIPBase	None	0.5483
RAID04120815	LOC284648	lncRNA	284648	Homo sapiens	POU2F2	protein	5452	Homo sapiens	ChIP-seq	ChIPBase	None	0.5483
RAID04120867	FENDRR	lncRNA	400550	Homo sapiens	ADGRE5	protein	976	Homo sapiens	Microarray//RNA-seq	LncRNA2Target	None	0.6606
RAID04120943	CRNDE	lncRNA	643911	Homo sapiens	PALLD	protein	23022	Homo sapiens	Microarray//RNA-seq	LncRNA2Target	None	0.6606
RAID04120954	Gm13056	lncRNA	100503810	Mus musculus	Rad21	protein	19357	Mus musculus	ChIP-seq	ChIPBase	None	0.5483
RAID04120986	DANCR	lncRNA	57291	Homo sapiens	EBF1	protein	1879	Homo sapiens	ChIP-seq	ChIPBase	None	0.5483
RAID04120987	TMEM161B-AS1	lncRNA	100505894	Homo sapiens	SRSF1	protein	6426	Homo sapiens	CLIP-seq	starBase	None	0.5483
RAID04121038	LINC00319	lncRNA	284836	Homo sapiens	TAF1	protein	6872	Homo sapiens	ChIP-seq	ChIPBase	None	0.5483
RAID04121041	LINC00304	lncRNA	283860	Homo sapiens	EP300	protein	2033	Homo sapiens	ChIP-seq	ChIPBase	None	0.5483
RAID04121083	MALAT1	lncRNA	378938	Homo sapiens	SLK	protein	9748	Homo sapiens	Microarray//RNA-seq	LncRNA2Target	None	0.6606
RAID04121119	G730013B05Rik	lncRNA	619312	Mus musculus	Btd	protein	26363	Mus musculus	Microarray//RNA-seq	LncRNA2Target	None	0.6606
RAID04121138	LOC285696	lncRNA	285696	Homo sapiens	POU2F2	protein	5452	Homo sapiens	ChIP-seq	ChIPBase	None	0.5483
RAID04121253	LOC339593	lncRNA	339593	Homo sapiens	NANOG	protein	79923	Homo sapiens	ChIP-seq	ChIPBase	None	0.5483
RAID04121281	LINC00152	lncRNA	112597	Homo sapiens	TIAL1	protein	7073	Homo sapiens	CLIP-seq	starBase	None	0.5483
RAID04121336	LOC285626	lncRNA	285626	Homo sapiens	TCF7L2	protein	6934	Homo sapiens	ChIP-seq	ChIPBase	None	0.5483
RAID04121337	G730013B05Rik	lncRNA	619312	Mus musculus	Bmper	protein	73230	Mus musculus	Microarray//RNA-seq	LncRNA2Target	None	0.6606
RAID04121344	CRNDE	lncRNA	643911	Homo sapiens	CTSH	protein	1512	Homo sapiens	Microarray//RNA-seq	LncRNA2Target	None	0.6606
RAID04121375	1700061J23Rik	lncRNA	76993	Mus musculus	Foxa2	protein	15376	Mus musculus	ChIP-seq	ChIPBase	None	0.5483
RAID04121386	GTSE1-AS1	lncRNA	150384	Homo sapiens	NRF1	protein	4899	Homo sapiens	ChIP-seq	ChIPBase	None	0.5483
RAID04121454	TPD52	lncRNA	7163	Homo sapiens	NANOG	protein	79923	Homo sapiens	ChIP-seq	ChIPBase	None	0.5483
RAID04121488	2700038G22Rik	lncRNA	67194	Mus musculus	Erg	protein	13876	Mus musculus	ChIP-seq	ChIPBase	None	0.5483
RAID04121491	SMG7-AS1	lncRNA	284649	Homo sapiens	SREBF1	protein	6720	Homo sapiens	ChIP-seq	ChIPBase	None	0.5483
RAID04121529	LOC100506178	lncRNA	100506178	Homo sapiens	STAT1	protein	6772	Homo sapiens	ChIP-seq	ChIPBase	None	0.5483
RAID04121535	TUG1	lncRNA	55000	Homo sapiens	HBP1	protein	26959	Homo sapiens	Microarray//RNA-seq	LncRNA2Target	None	0.6606
RAID04121573	USP12-AS2	lncRNA	100874071	Homo sapiens	JUN	protein	3725	Homo sapiens	ChIP-seq	ChIPBase	None	0.5483
RAID04121585	NKAPP1	lncRNA	158801	Homo sapiens	STAT1	protein	6772	Homo sapiens	ChIP-seq	ChIPBase	None	0.5483
RAID04121614	A230028O05Rik	lncRNA	319487	Mus musculus	Pparg	protein	19016	Mus musculus	ChIP-seq	ChIPBase	None	0.5483
RAID04121635	A730017L22Rik	lncRNA	613258	Mus musculus	Hnrnpk	protein	15387	Mus musculus	CLIP-seq	starBase	None	0.5483
RAID04121645	CRNDE	lncRNA	643911	Homo sapiens	GLDN	protein	342035	Homo sapiens	Microarray//RNA-seq	LncRNA2Target	None	0.6606
RAID04121651	1110019D14Rik	lncRNA	76311	Mus musculus	Cebpa	protein	12606	Mus musculus	ChIP-seq	ChIPBase	None	0.5483
RAID04121680	TUG1	lncRNA	55000	Homo sapiens	RNFT1	protein	51136	Homo sapiens	Microarray//RNA-seq	LncRNA2Target	None	0.6606
RAID04121690	4930401G09Rik	lncRNA	73792	Mus musculus	Spi1	protein	20375	Mus musculus	ChIP-seq	ChIPBase	None	0.5483
RAID04121704	GNAI2	lncRNA	2771	Homo sapiens	RAD21	protein	5885	Homo sapiens	ChIP-seq	ChIPBase	None	0.5483
RAID04121750	SEMA3B	lncRNA	7869	Homo sapiens	TNRC6A	protein	27327	Homo sapiens	CLIP-seq	starBase	None	0.5483
RAID04121873	FENDRR	lncRNA	400550	Homo sapiens	AFF3	protein	3899	Homo sapiens	Microarray//RNA-seq	LncRNA2Target	None	0.6606
RAID04121887	1700086O06Rik	lncRNA	73516	Mus musculus	Zfx	protein	22764	Mus musculus	ChIP-seq	ChIPBase	None	0.5483
RAID04121920	TUG1	lncRNA	55000	Homo sapiens	MPDU1	protein	9526	Homo sapiens	Microarray//RNA-seq	LncRNA2Target	None	0.6606
RAID04121937	FENDRR	lncRNA	400550	Homo sapiens	CNPY4	protein	245812	Homo sapiens	Microarray//RNA-seq	LncRNA2Target	None	0.6606
RAID04121976	TUG1	lncRNA	55000	Homo sapiens	EPHA4	protein	2043	Homo sapiens	Microarray//RNA-seq	LncRNA2Target	None	0.6606
RAID04121997	MALAT1	lncRNA	378938	Homo sapiens	CUL2	protein	8453	Homo sapiens	Microarray//RNA-seq	LncRNA2Target	None	0.6606
RAID04122092	MALAT1	lncRNA	378938	Homo sapiens	RCE1	protein	9986	Homo sapiens	Microarray//RNA-seq	LncRNA2Target	None	0.6606
RAID04122147	BANCR	lncRNA	100885775	Homo sapiens	APOBEC3A	protein	200315	Homo sapiens	Microarray//RNA-seq	LncRNA2Target	None	0.6606
RAID04122151	DLEU2	lncRNA	8847	Homo sapiens	E2F1	protein	1869	Homo sapiens	ChIP-seq	ChIPBase	None	0.5483
RAID04122152	TUG1	lncRNA	55000	Homo sapiens	DEFB124	protein	245937	Homo sapiens	Microarray//RNA-seq	LncRNA2Target	None	0.6606
RAID04122157	TUG1	lncRNA	55000	Homo sapiens	DCTN5	protein	84516	Homo sapiens	Microarray//RNA-seq	LncRNA2Target	None	0.6606
RAID04122160	MALAT1	lncRNA	378938	Homo sapiens	ZBTB11	protein	27107	Homo sapiens	Microarray//RNA-seq	LncRNA2Target	None	0.6606
RAID04122177	C11orf95	lncRNA	65998	Homo sapiens	SRSF1	protein	6426	Homo sapiens	CLIP-seq	starBase	None	0.5483
RAID04122233	SNHG6	lncRNA	641638	Homo sapiens	HNRNPC	protein	3183	Homo sapiens	CLIP-seq	starBase	None	0.5483
RAID04122241	CRNDE	lncRNA	643911	Homo sapiens	RHNO1	protein	83695	Homo sapiens	Microarray//RNA-seq	LncRNA2Target	None	0.6606
RAID04122289	CRNDE	lncRNA	643911	Homo sapiens	CHST14	protein	113189	Homo sapiens	Microarray//RNA-seq	LncRNA2Target	None	0.6606
RAID04122296	SPDL1	lncRNA	54908	Homo sapiens	NANOG	protein	79923	Homo sapiens	ChIP-seq	ChIPBase	None	0.5483
RAID04122324	FENDRR	lncRNA	400550	Homo sapiens	UBE2K	protein	3093	Homo sapiens	Microarray//RNA-seq	LncRNA2Target	None	0.6606
RAID04122353	SEPT7P2	lncRNA	641977	Homo sapiens	CEBPB	protein	1051	Homo sapiens	ChIP-seq	ChIPBase	None	0.5483
RAID04122409	FTX	lncRNA	100302692	Homo sapiens	MAX	protein	4149	Homo sapiens	ChIP-seq	ChIPBase	None	0.5483
RAID04122423	CRNDE	lncRNA	643911	Homo sapiens	CXCL3	protein	2921	Homo sapiens	Microarray//RNA-seq	LncRNA2Target	None	0.6606
RAID04122517	ZNF664	lncRNA	144348	Homo sapiens	SMARCC1	protein	6599	Homo sapiens	ChIP-seq	ChIPBase	None	0.5483
RAID04122550	MALAT1	lncRNA	378938	Homo sapiens	TARS2	protein	80222	Homo sapiens	Microarray//RNA-seq	LncRNA2Target	None	0.6606
RAID04122560	HULC	lncRNA	728655	Homo sapiens	CWF19L1	protein	55280	Homo sapiens	Western Blot//RT-PCR	LncRNA2Target	17241883	0.8808
RAID04122597	FENDRR	lncRNA	400550	Homo sapiens	MYEOV2	protein	150678	Homo sapiens	Microarray//RNA-seq	LncRNA2Target	None	0.6606
RAID04122638	Gm12580	lncRNA	433711	Mus musculus	Cebpa	protein	12606	Mus musculus	ChIP-seq	ChIPBase	None	0.5483
RAID04122640	A330032B11Rik	lncRNA	319931	Mus musculus	Spi1	protein	20375	Mus musculus	ChIP-seq	ChIPBase	None	0.5483
RAID04122645	PNKD	lncRNA	25953	Homo sapiens	MYC	protein	4609	Homo sapiens	ChIP-seq	ChIPBase	None	0.5483
RAID04122677	LOC728752	lncRNA	728752	Homo sapiens	MAX	protein	4149	Homo sapiens	ChIP-seq	ChIPBase	None	0.5483
RAID04122701	RAET1K	lncRNA	646024	Homo sapiens	SMARCB1	protein	6598	Homo sapiens	ChIP-seq	ChIPBase	None	0.5483
RAID04122713	CRNDE	lncRNA	643911	Homo sapiens	ETS1	protein	2113	Homo sapiens	ChIP-seq	ChIPBase	None	0.5483
RAID04122721	TUG1	lncRNA	55000	Homo sapiens	C6orf120	protein	387263	Homo sapiens	Microarray//RNA-seq	LncRNA2Target	None	0.6606
RAID04122740	TFEB	lncRNA	7942	Homo sapiens	SP1	protein	6667	Homo sapiens	ChIP-seq	ChIPBase	None	0.5483
RAID04122742	MALAT1	lncRNA	378938	Homo sapiens	ZNF654	protein	55279	Homo sapiens	Microarray//RNA-seq	LncRNA2Target	None	0.6606
RAID04122769	CTC-338M12.4	lncRNA	101928649	Homo sapiens	LIN28A	protein	79727	Homo sapiens	CLIP-seq	starBase	None	0.5483
RAID04122863	Gm6410	lncRNA	623223	Mus musculus	Ep300	protein	328572	Mus musculus	ChIP-seq	ChIPBase	None	0.5483
RAID04122876	LINC00526	lncRNA	147525	Homo sapiens	IRF4	protein	3662	Homo sapiens	ChIP-seq	ChIPBase	None	0.5483
RAID04122882	MALAT1	lncRNA	378938	Homo sapiens	PECAM1	protein	5175	Homo sapiens	Microarray//RNA-seq	LncRNA2Target	None	0.6606
RAID04122906	GYG1	lncRNA	2992	Homo sapiens	E2F4	protein	1874	Homo sapiens	ChIP-seq	ChIPBase	None	0.5483
RAID04122933	TUG1	lncRNA	55000	Homo sapiens	DACT1	protein	51339	Homo sapiens	Microarray//RNA-seq	LncRNA2Target	None	0.6606
RAID04122934	SCAMP1	lncRNA	9522	Homo sapiens	TNRC6A	protein	27327	Homo sapiens	CLIP-seq	starBase	None	0.5483
RAID04122946	TUG1	lncRNA	55000	Homo sapiens	ACADS	protein	35	Homo sapiens	Microarray//RNA-seq	LncRNA2Target	None	0.6606
RAID04123014	TUG1	lncRNA	55000	Homo sapiens	PRDM1	protein	639	Homo sapiens	Microarray//RNA-seq	LncRNA2Target	None	0.6606
RAID04123024	MALAT1	lncRNA	378938	Homo sapiens	SARS	protein	6301	Homo sapiens	Microarray//RNA-seq	LncRNA2Target	None	0.6606
RAID04123027	G730013B05Rik	lncRNA	619312	Mus musculus	St8sia4	protein	20452	Mus musculus	Microarray//RNA-seq	LncRNA2Target	None	0.6606
RAID04123054	HCG18	lncRNA	414777	Homo sapiens	HEY1	protein	23462	Homo sapiens	ChIP-seq	ChIPBase	None	0.5483
RAID04123063	KCNC4-AS1	lncRNA	100873974	Homo sapiens	MAX	protein	4149	Homo sapiens	ChIP-seq	ChIPBase	None	0.5483
RAID04123064	LINC00337	lncRNA	148645	Homo sapiens	FUS	protein	2521	Homo sapiens	CLIP-seq	starBase	None	0.5483
RAID04123085	FENDRR	lncRNA	400550	Homo sapiens	DDX39A	protein	10212	Homo sapiens	Microarray//RNA-seq	LncRNA2Target	None	0.6606
RAID04123086	TUG1	lncRNA	55000	Homo sapiens	LARP4	protein	113251	Homo sapiens	Microarray//RNA-seq	LncRNA2Target	None	0.6606
RAID04123093	RASA3-IT1	lncRNA	100874321	Homo sapiens	EBF1	protein	1879	Homo sapiens	ChIP-seq	ChIPBase	None	0.5483
RAID04123124	Gm11412	lncRNA	100040144	Mus musculus	Spi1	protein	20375	Mus musculus	ChIP-seq	ChIPBase	None	0.5483
RAID04123132	2700038G22Rik	lncRNA	67194	Mus musculus	Ctcf	protein	13018	Mus musculus	ChIP-seq	ChIPBase	None	0.5483
RAID04123163	CLIC5	lncRNA	53405	Homo sapiens	GATA6	protein	2627	Homo sapiens	ChIP-seq	ChIPBase	None	0.5483
RAID04123188	G730013B05Rik	lncRNA	619312	Mus musculus	Fzd10	protein	93897	Mus musculus	Microarray//RNA-seq	LncRNA2Target	None	0.6606
RAID04123216	4930509G22Rik	lncRNA	67734	Mus musculus	Slc22a2	protein	20518	Mus musculus	ChIP-seq	ChIPBase	None	0.5483
RAID04123243	LINC00240	lncRNA	100133205	Homo sapiens	IRF4	protein	3662	Homo sapiens	ChIP-seq	ChIPBase	None	0.5483
RAID04123245	LOC648987	lncRNA	648987	Homo sapiens	NR3C1	protein	2908	Homo sapiens	ChIP-seq	ChIPBase	None	0.5483
RAID04123271	FENDRR	lncRNA	400550	Homo sapiens	STX4	protein	6810	Homo sapiens	Microarray//RNA-seq	LncRNA2Target	None	0.6606
RAID04123315	2700033N17Rik	lncRNA	72603	Mus musculus	Ezh2	protein	14056	Mus musculus	ChIP-seq	ChIPBase	None	0.5483
RAID04123356	CRNDE	lncRNA	643911	Homo sapiens	ITPR1	protein	3708	Homo sapiens	Microarray//RNA-seq	LncRNA2Target	None	0.6606
RAID04123362	LINC00094	lncRNA	266655	Homo sapiens	MED12	protein	9968	Homo sapiens	ChIP-seq	ChIPBase	None	0.5483
RAID04123365	MMP24-AS1	lncRNA	101410538	Homo sapiens	ELAVL1	protein	1994	Homo sapiens	CLIP-seq	starBase	None	0.5483
RAID04123370	DLEU2	lncRNA	8847	Homo sapiens	CEBPA	protein	1050	Homo sapiens	ChIP-seq	ChIPBase	None	0.5483
RAID04123451	OR7D2	lncRNA	162998	Homo sapiens	CDX2	protein	1045	Homo sapiens	ChIP-seq	ChIPBase	None	0.5483
RAID04123461	DGCR5	lncRNA	26220	Homo sapiens	REST	protein	5978	Homo sapiens	RT-PCR//ChIP (chromatin immunoprecipitation assay)	MNDR//RAID//NPInter	19050060	0.8785
RAID04123470	TUG1	lncRNA	55000	Homo sapiens	IVL	protein	3713	Homo sapiens	Microarray//RNA-seq	LncRNA2Target	None	0.6606
RAID04123478	1700023C21Rik	lncRNA	73257	Mus musculus	Cebpb	protein	12608	Mus musculus	ChIP-seq	ChIPBase	None	0.5483
RAID04123488	PCAT4	lncRNA	118425	Homo sapiens	SPI1	protein	6688	Homo sapiens	ChIP-seq	ChIPBase	None	0.5483
RAID04123489	ANO10	lncRNA	55129	Homo sapiens	TCF12	protein	6938	Homo sapiens	ChIP-seq	ChIPBase	None	0.5483
RAID04123493	PPP1R9B	lncRNA	84687	Homo sapiens	HNRNPC	protein	3183	Homo sapiens	CLIP-seq	starBase	None	0.5483
RAID04123498	LINC00615	lncRNA	439916	Homo sapiens	SPI1	protein	6688	Homo sapiens	ChIP-seq	ChIPBase	None	0.5483
RAID04123518	BC028471	lncRNA	414071	Mus musculus	Fus	protein	233908	Mus musculus	CLIP-seq	starBase	None	0.5483
RAID04123525	1700113A16Rik	lncRNA	76642	Mus musculus	Erg	protein	13876	Mus musculus	ChIP-seq	ChIPBase	None	0.5483
RAID04123546	C1orf186	lncRNA	440712	Homo sapiens	TCF12	protein	6938	Homo sapiens	ChIP-seq	ChIPBase	None	0.5483
RAID04123582	LOC100289650	lncRNA	100289650	Homo sapiens	AR	protein	367	Homo sapiens	ChIP-seq	ChIPBase	None	0.5483
RAID04123585	LINC00161	lncRNA	118421	Homo sapiens	JUN	protein	3725	Homo sapiens	ChIP-seq	ChIPBase	None	0.5483
RAID04123636	CRNDE	lncRNA	643911	Homo sapiens	EVA1C	protein	59271	Homo sapiens	Microarray//RNA-seq	LncRNA2Target	None	0.6606
RAID04123661	Gm14424	lncRNA	667804	Mus musculus	Ezh2	protein	14056	Mus musculus	ChIP-seq	ChIPBase	None	0.5483
RAID04123671	ZNF664	lncRNA	144348	Homo sapiens	TAF1	protein	6872	Homo sapiens	ChIP-seq	ChIPBase	None	0.5483
RAID04123688	TUG1	lncRNA	55000	Homo sapiens	GSTA4	protein	2941	Homo sapiens	Microarray//RNA-seq	LncRNA2Target	None	0.6606
RAID04123735	CRNDE	lncRNA	643911	Homo sapiens	ARHGAP11A	protein	9824	Homo sapiens	Microarray//RNA-seq	LncRNA2Target	None	0.6606
RAID04123816	LINC00520	lncRNA	645687	Homo sapiens	POU5F1	protein	5460	Homo sapiens	ChIP-seq	ChIPBase	None	0.5483
RAID04123879	LRRC8C	lncRNA	84230	Homo sapiens	JUN	protein	3725	Homo sapiens	ChIP-seq	ChIPBase	None	0.5483
RAID04123959	MALAT1	lncRNA	378938	Homo sapiens	NCAPG2	protein	54892	Homo sapiens	Microarray//RNA-seq	LncRNA2Target	None	0.6606
RAID04124072	TUG1	lncRNA	55000	Homo sapiens	MICU1	protein	10367	Homo sapiens	Microarray//RNA-seq	LncRNA2Target	None	0.6606
RAID04124089	FENDRR	lncRNA	400550	Homo sapiens	ZSWIM1	protein	90204	Homo sapiens	Microarray//RNA-seq	LncRNA2Target	None	0.6606
RAID04124090	TUG1	lncRNA	55000	Homo sapiens	DEGS1	protein	8560	Homo sapiens	Microarray//RNA-seq	LncRNA2Target	None	0.6606
RAID04124113	FENDRR	lncRNA	400550	Homo sapiens	NECTIN3	protein	25945	Homo sapiens	Microarray//RNA-seq	LncRNA2Target	None	0.6606
RAID04124130	HEIH	lncRNA	100859930	Homo sapiens	CDKN2B	protein	1030	Homo sapiens	Western Blot//RT-PCR	LncRNA2Target	21769904	0.8808
RAID04124149	FENDRR	lncRNA	400550	Homo sapiens	OAT	protein	4942	Homo sapiens	Microarray//RNA-seq	LncRNA2Target	None	0.6606
RAID04124183	FENDRR	lncRNA	400550	Homo sapiens	JAG1	protein	182	Homo sapiens	Microarray//RNA-seq	LncRNA2Target	None	0.6606
RAID04124210	OLMALINC	lncRNA	90271	Homo sapiens	FUS	protein	2521	Homo sapiens	CLIP-seq	starBase	None	0.5483
RAID04124226	Gm13847	lncRNA	102634036	Mus musculus	Gata1	protein	14460	Mus musculus	ChIP-seq	ChIPBase	None	0.5483
RAID04124238	Gm15498	lncRNA	100134986	Mus musculus	Tbx5	protein	21388	Mus musculus	ChIP-seq	ChIPBase	None	0.5483
RAID04124246	1700007L15Rik	lncRNA	100502742	Mus musculus	Tmem163	protein	72160	Mus musculus	Microarray//RNA-seq	LncRNA2Target	None	0.6606
RAID04124261	MIR99AHG	lncRNA	388815	Homo sapiens	SPDEF	protein	25803	Homo sapiens	ChIP-seq	ChIPBase	None	0.5483
RAID04124273	FENDRR	lncRNA	400550	Homo sapiens	PPP4R4	protein	57718	Homo sapiens	Microarray//RNA-seq	LncRNA2Target	None	0.6606
RAID04124277	MALAT1	lncRNA	378938	Homo sapiens	PLK1	protein	5347	Homo sapiens	Microarray//RNA-seq	LncRNA2Target	None	0.6606
RAID04124278	THAP9-AS1	lncRNA	100499177	Homo sapiens	PUM2	protein	23369	Homo sapiens	CLIP-seq	starBase	None	0.5483
RAID04124314	Gm2694	lncRNA	100040294	Mus musculus	Stoml1	protein	69106	Mus musculus	Microarray//RNA-seq	LncRNA2Target	None	0.6606
RAID04124352	SNHG9	lncRNA	735301	Homo sapiens	CDX2	protein	1045	Homo sapiens	ChIP-seq	ChIPBase	None	0.5483
RAID04124355	2700046G09Rik	lncRNA	67188	Mus musculus	Erg	protein	13876	Mus musculus	ChIP-seq	ChIPBase	None	0.5483
RAID04124362	CABIN1	lncRNA	23523	Homo sapiens	U2AF2	protein	11338	Homo sapiens	CLIP-seq	starBase	None	0.5483
RAID04124401	LINC00319	lncRNA	284836	Homo sapiens	E2F6	protein	1876	Homo sapiens	ChIP-seq	ChIPBase	None	0.5483
RAID04124418	RHPN1-AS1	lncRNA	78998	Homo sapiens	GATA6	protein	2627	Homo sapiens	ChIP-seq	ChIPBase	None	0.5483
RAID04124524	FENDRR	lncRNA	400550	Homo sapiens	PCOLCE	protein	5118	Homo sapiens	Microarray//RNA-seq	LncRNA2Target	None	0.6606
RAID04124540	FTX	lncRNA	100302692	Homo sapiens	U2AF2	protein	11338	Homo sapiens	CLIP-seq	starBase	None	0.5483
RAID04124573	MALAT1	lncRNA	378938	Homo sapiens	SKIV2L	protein	6499	Homo sapiens	Microarray//RNA-seq	LncRNA2Target	None	0.6606
RAID04124612	LINC00160	lncRNA	54064	Homo sapiens	SMARCB1	protein	6598	Homo sapiens	ChIP-seq	ChIPBase	None	0.5483
RAID04124637	KU-MEL-3	lncRNA	497048	Homo sapiens	CEBPA	protein	1050	Homo sapiens	ChIP-seq	ChIPBase	None	0.5483
RAID04124714	MALAT1	lncRNA	378938	Homo sapiens	SLIT2	protein	9353	Homo sapiens	Microarray//RNA-seq	LncRNA2Target	None	0.6606
[truncated: 38,669 more rows]
